# Supplementary material for: Rainbow Trout Red Blood Cells Exposed to Viral Hemorrhagic Septicemia Virus Up-Regulate Antigen-Processing Mechanisms and MHC I&II, CD86, and CD83 Antigen-presenting Cell Markers
Source: MDPI journal article supplement (doi:10.3390/cells8050386), 2019-04-27

**Supplementary Figure S5.** Venn diagram of the common omics products identified by transcriptomics at 4 and 72 hpe and proteomics at 72 hpe.

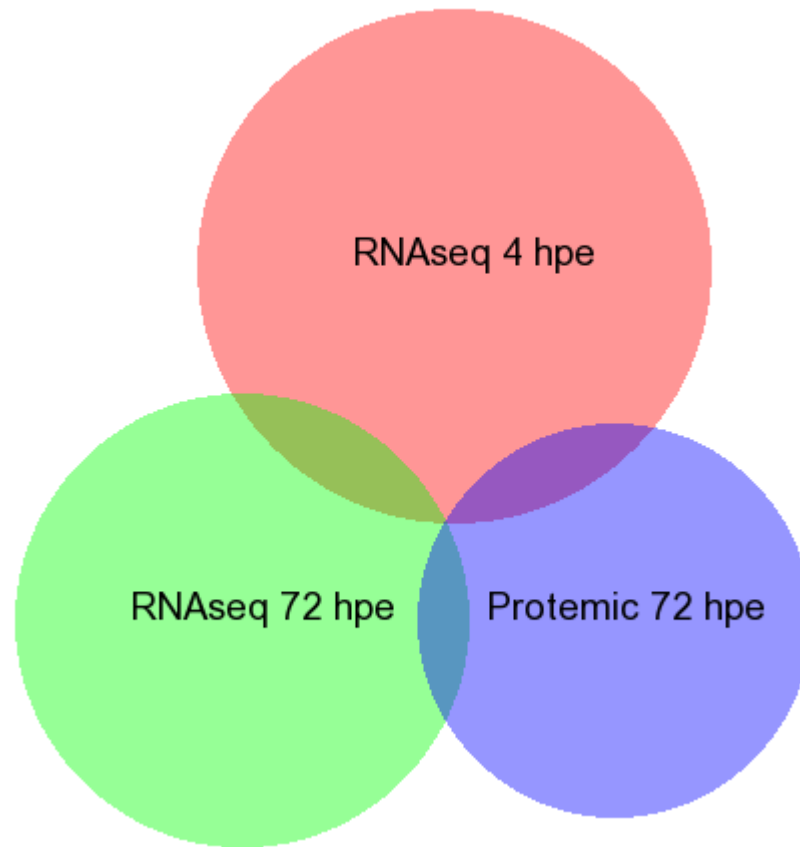

Supplement: s1 [file s1]
