# Supplementary material for: Rainbow Trout Red Blood Cells Exposed to Viral Hemorrhagic Septicemia Virus Up-Regulate Antigen-Processing Mechanisms and MHC I&II, CD86, and CD83 Antigen-presenting Cell Markers
Source: MDPI journal article supplement (doi:10.3390/cells8050386), 2019-04-27

**Supplementary Figure S4.** Validation of RNASeq results by RT-qPCR representing fold change of *cul3*, *psmb5*, *keap1*, *sec13*, *ikbkb*, *rab7* and *traf6* genes in the transcriptomic analysis of VHSV-exposed RBCs at 4 and 72 hpe. Gene expression values were calculated with normalization to unexposed RBCs. Data represent the mean  $\pm$  SD (n=4). A Mann-Whitney test was used to test statistical significances between VHSV-exposed and unexposed RBCs.

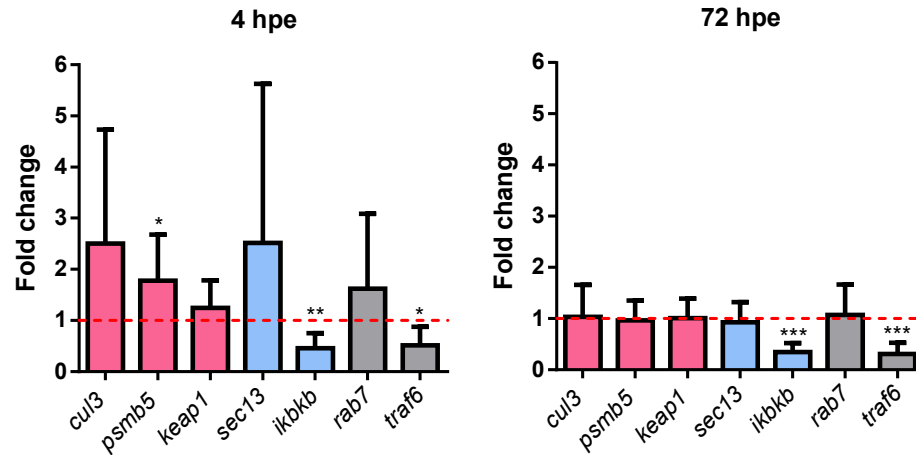

Supplement: s1 [file s1]
