# Supplementary material for: Rainbow Trout Red Blood Cells Exposed to Viral Hemorrhagic Septicemia Virus Up-Regulate Antigen-Processing Mechanisms and MHC I&II, CD86, and CD83 Antigen-presenting Cell Markers
Source: MDPI journal article supplement (doi:10.3390/cells8050386), 2019-04-27

**Supplementary Figure S7.** Time-course expression of the autophagy-related genes *beclin1*, *ULK1*, and *gabarap* at 0, 3, 6, 24, 48, and 72 hpe from unexposed and VHSV-exposed (MOI 1) RBCs. Data represent the mean  $\pm$  SD (n = 5) relative to control cells (black dotted line). A Two-way ANOVA with Sidak's multiple comparisons test was performed to test statistical significance between unexposed and VHSV-exposed RBCs at each time point.

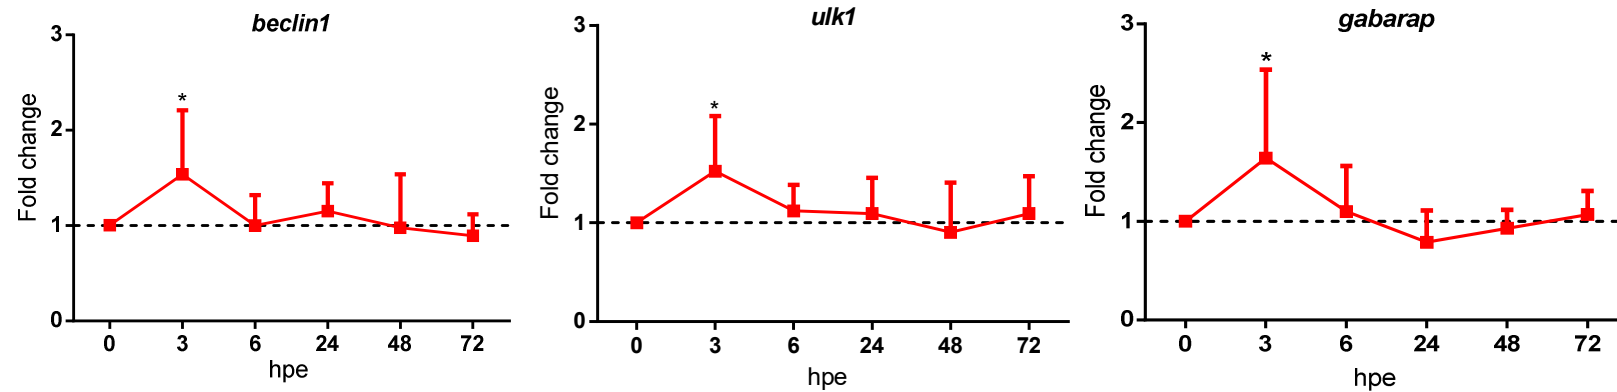

Supplement: s1 [file s1]
