# Supplementary material for: Rainbow Trout Red Blood Cells Exposed to Viral Hemorrhagic Septicemia Virus Up-Regulate Antigen-Processing Mechanisms and MHC I&II, CD86, and CD83 Antigen-presenting Cell Markers
Source: Cells. 2019 Apr 27;8(5):386. doi: 10.3390/cells8050386 (PMC6562805; doi:10.3390/cells8050386)
Supplement: Supplementary file 1 [file cells-08-00386-s001.zip]

Archive with 11 entries (11 files):
- Supplementary Table S3.xlsx
- Supplementary Table S1.xlsx
- Supplementary Table S4.xlsx
- Supplementary Table S2.xlsx
- Supplementary Figure S7.pdf
- Supplementary Figure S1.pdf
- Supplementary Figure S2.pdf
- Supplementary Figure S3.pdf
- Supplementary Figure S4_2.pdf
- Supplementary Figure S5_2.pdf
- Supplementary Figure S6.pdf
