# Supplementary material for: Rainbow Trout Red Blood Cells Exposed to Viral Hemorrhagic Septicemia Virus Up-Regulate Antigen-Processing Mechanisms and MHC I&II, CD86, and CD83 Antigen-presenting Cell Markers
Source: Cells. 2019 Apr 27;8(5):386. doi: 10.3390/cells8050386 (PMC6562805; doi:10.3390/cells8050386)
Supplement: Supplementary file 1 [file cells-08-00386-s001.zip › Supplementary Table S1.xlsx]

## Sheet: Cytoscape processes RNAseq 4h
GOID	GOTerm	Ontology Source	Term PValue	Term PValue Corrected with Bonferroni step down	Group PValue	Group PValue Corrected with Bonferroni step down	GOLevels	GOGroups	% Associated Genes	Nr. Genes	Cluster	Genes Cluster #1	Genes Cluster #2	%Genes Cluster #1	%Genes Cluster #2	Associated Genes Found
GO:0006611	protein export from nucleus	GO_BiologicalProcess-EBI-QuickGO-GOA_20.11.2017_00h00	5.88914e-05	0.0291513	5.88914e-05	5.88914e-05	[5, 6, 7, 8, 9]	Group0	10.6383	20	None Specific Cluster	[CPSF1, EIF6, ENY2, NUP43, NXT1, POLDIP3, PRKACA, RBMX2, SRSF5, YWHAE]	[ANP32B, CCHCR1, CTDSPL2, EIF4E, NOL6, NUP58, SRRM1, SRSF3, SUPT6H, XPO7]	50	50	[ANP32B, CCHCR1, CPSF1, CTDSPL2, EIF4E, EIF6, ENY2, NOL6, NUP43, NUP58, NXT1, POLDIP3, PRKACA, RBMX2, SRRM1, SRSF3, SRSF5, SUPT6H, XPO7, YWHAE]
R-HSA:5696398	Nucleotide Excision Repair	REACTOME_Pathways_20.11.2017	7.58502e-06	0.00399731	7.58502e-06	1.517e-05	[-1]	Group1	14.4144	16	Specific for Cluster #1	[ACTR8, CETN2, COPS2, NFRKB, POLD3, POLE3, RAD23A, TFPT, UBE2I, UVSSA]	[CDK7, GTF2H5, POLR2J, POLR2K, RPA1, USP7]	62.5	37.5	[ACTR8, CDK7, CETN2, COPS2, GTF2H5, NFRKB, POLD3, POLE3, POLR2J, POLR2K, RAD23A, RPA1, TFPT, UBE2I, USP7, UVSSA]
R-HSA:597592	Post-translational protein modification	REACTOME_Pathways_20.11.2017	5.34294e-11	3.01876e-08	5.34294e-11	3.20576e-10	[-1]	Group2	7.61974	105	None Specific Cluster	[ACTR8, ALG12, ALG2, ARFGAP2, BECN1, C1GALT1C1, CANX, CETN2, COPS2, CUL3, DCAF7, DYNLL2, EEF2, F2, FAM20C, GNE, HCFC1, HDAC1, KEAP1, KLHL13, LMAN2, NFRKB, NUP43, PIGH, POMGNT2, PSMA6, PSMB5, PSMB7, PSMD12, PSMD6, PSME3, RAB18, RAD23A, RING1, RNF168, SEC13, SMAD2, STX5, SUDS3, TFG, TFPT, TRAPPC2L, TRAPPC5, TTLL9, UBE2D1, UBE2I, UBE2W, USP19]	[ADAMTS13, ARCN1, ARSA, ASB5, B3GNT2, BABAM1, CALM3, CDC34, CISH, COPB2, COPZ1, CUL1, DCAF6, DCTN2, DYNC1I2, FAM20A, FBXL4, FBXL8, GGCX, GMPPA, GOSR1, JOSD1, MBD6, MGAT1, MPDU1, MUL1, NSMCE1, NUP58, PDIA3, PIGV, PSMA2, PSMC4, PSMD9, RAB1B, RAB2A, RAB3A, RAB5C, RNF139, RPA1, SAR1B, SEC22A, SEC31A, SENP1, SMAD1, ST3GAL3, STAG2, TADA3, TDG, TMED7, TMEM129, TRAPPC4, TRAPPC6B, TRIM25, UBE2A, UBE2G1, U…	45.7143	54.2857	[ACTR8, ADAMTS13, ALG12, ALG2, ARCN1, ARFGAP2, ARSA, ASB5, B3GNT2, BABAM1, BECN1, C1GALT1C1, CALM3, CANX, CDC34, CETN2, CISH, COPB2, COPS2, COPZ1, CUL1, CUL3, DCAF6, DCAF7, DCTN2, DYNC1I2, DYNLL2, EEF2, F2, FAM20A, FAM20C, FBXL4, FBXL8, GGCX, GMPPA, GNE, GOSR1, HCFC1, HDAC1, JOSD1, KEAP1, KLHL13, LMAN2, MBD6, MGAT1, MPDU1, MUL1, NFRKB, NSMCE1, NUP43, NUP58, PDIA3, PIGH, PIGV, POMGNT2, PSMA2, PSMA…
R-HSA:199977	ER to Golgi Anterograde Transport	REACTOME_Pathways_20.11.2017	8.50942e-07	0.000467167	2.02713e-06	6.08138e-06	[-1]	Group3	13.5484	21	Specific for Cluster #2	[ARFGAP2, DYNLL2, LMAN2, SEC13, STX5, TFG, TRAPPC2L, TRAPPC5]	[ARCN1, COPB2, COPZ1, DCTN2, DYNC1I2, GOSR1, RAB1B, SAR1B, SEC22A, SEC31A, TMED7, TRAPPC4, TRAPPC6B]	38.0952	61.9048	[ARCN1, ARFGAP2, COPB2, COPZ1, DCTN2, DYNC1I2, DYNLL2, GOSR1, LMAN2, RAB1B, SAR1B, SEC13, SEC22A, SEC31A, STX5, TFG, TMED7, TRAPPC2L, TRAPPC4, TRAPPC5, TRAPPC6B]
R-HSA:204005	COPII (Coat Protein 2) Mediated Vesicle Transport	REACTOME_Pathways_20.11.2017	1.2914e-05	0.00668947	2.02713e-06	6.08138e-06	[-1]	Group3	17.6471	12	None Specific Cluster	[LMAN2, SEC13, STX5, TFG, TRAPPC2L, TRAPPC5]	[RAB1B, SAR1B, SEC22A, SEC31A, TRAPPC4, TRAPPC6B]	50	50	[LMAN2, RAB1B, SAR1B, SEC13, SEC22A, SEC31A, STX5, TFG, TRAPPC2L, TRAPPC4, TRAPPC5, TRAPPC6B]
R-HSA:446203	Asparagine N-linked glycosylation	REACTOME_Pathways_20.11.2017	1.61191e-06	0.000878489	2.02713e-06	6.08138e-06	[-1]	Group3	10.1639	31	Specific for Cluster #2	[ALG12, ALG2, ARFGAP2, CANX, DYNLL2, GNE, LMAN2, SEC13, STX5, TFG, TRAPPC2L, TRAPPC5]	[ARCN1, COPB2, COPZ1, DCTN2, DYNC1I2, GMPPA, GOSR1, MGAT1, MPDU1, PDIA3, RAB1B, RNF139, SAR1B, SEC22A, SEC31A, ST3GAL3, TMED7, TRAPPC4, TRAPPC6B]	38.7097	61.2903	[ALG12, ALG2, ARCN1, ARFGAP2, CANX, COPB2, COPZ1, DCTN2, DYNC1I2, DYNLL2, GMPPA, GNE, GOSR1, LMAN2, MGAT1, MPDU1, PDIA3, RAB1B, RNF139, SAR1B, SEC13, SEC22A, SEC31A, ST3GAL3, STX5, TFG, TMED7, TRAPPC2L, TRAPPC4, TRAPPC5, TRAPPC6B]
R-HSA:948021	Transport to the Golgi and subsequent modification	REACTOME_Pathways_20.11.2017	4.70004e-06	0.00251452	2.02713e-06	6.08138e-06	[-1]	Group3	11.828	22	Specific for Cluster #2	[ARFGAP2, DYNLL2, LMAN2, SEC13, STX5, TFG, TRAPPC2L, TRAPPC5]	[ARCN1, COPB2, COPZ1, DCTN2, DYNC1I2, GOSR1, MGAT1, RAB1B, SAR1B, SEC22A, SEC31A, TMED7, TRAPPC4, TRAPPC6B]	36.3636	63.6364	[ARCN1, ARFGAP2, COPB2, COPZ1, DCTN2, DYNC1I2, DYNLL2, GOSR1, LMAN2, MGAT1, RAB1B, SAR1B, SEC13, SEC22A, SEC31A, STX5, TFG, TMED7, TRAPPC2L, TRAPPC4, TRAPPC5, TRAPPC6B]
GO:0006888	ER to Golgi vesicle-mediated transport	GO_BiologicalProcess-EBI-QuickGO-GOA_20.11.2017_00h00	1.54663e-07	8.63019e-05	2.02713e-06	6.08138e-06	[4, 5, 6]	Group3	13.089	25	Specific for Cluster #2	[ARFGAP2, CUL3, DYNLL2, F2, SEC13, SPAST, STX5, TFG, TRAPPC2L, TRAPPC5]	[ARCN1, COPB2, COPZ1, DCTN2, DYNC1I2, GOSR1, RAB1B, RAB2A, RNF139, SAR1B, SEC22A, SEC31A, TMED7, TRAPPC4, TRAPPC6B]	40	60	[ARCN1, ARFGAP2, COPB2, COPZ1, CUL3, DCTN2, DYNC1I2, DYNLL2, F2, GOSR1, RAB1B, RAB2A, RNF139, SAR1B, SEC13, SEC22A, SEC31A, SPAST, STX5, TFG, TMED7, TRAPPC2L, TRAPPC4, TRAPPC5, TRAPPC6B]
GO:0048199	vesicle targeting, to, from or within Golgi	GO_BiologicalProcess-EBI-QuickGO-GOA_20.11.2017_00h00	2.35729e-05	0.0120693	2.02713e-06	6.08138e-06	[3, 6, 7]	Group3	16.6667	12	None Specific Cluster	[CUL3, SEC13, STX5, TFG, TRAPPC2L, TRAPPC5]	[GOSR1, RAB1B, SAR1B, SEC31A, TRAPPC4, TRAPPC6B]	50	50	[CUL3, GOSR1, RAB1B, SAR1B, SEC13, SEC31A, STX5, TFG, TRAPPC2L, TRAPPC4, TRAPPC5, TRAPPC6B]
GO:0048208	COPII vesicle coating	GO_BiologicalProcess-EBI-QuickGO-GOA_20.11.2017_00h00	4.43238e-05	0.0222062	2.02713e-06	6.08138e-06	[5, 6, 7, 8, 9]	Group3	16.9231	11	None Specific Cluster	[CUL3, SEC13, STX5, TFG, TRAPPC2L, TRAPPC5]	[RAB1B, SAR1B, SEC31A, TRAPPC4, TRAPPC6B]	54.5455	45.4545	[CUL3, RAB1B, SAR1B, SEC13, SEC31A, STX5, TFG, TRAPPC2L, TRAPPC4, TRAPPC5, TRAPPC6B]
R-HSA:72163	mRNA Splicing - Major Pathway	REACTOME_Pathways_20.11.2017	1.23239e-05	0.00639611	2.13352e-08	1.06676e-07	[-1]	Group4	11.4754	21	None Specific Cluster	[CPSF1, GTF2F2, HNRNPA0, HNRNPH1, HNRNPL, LSM5, RBM17, SF3B1, SNRPD3, SRSF5]	[CWC15, DHX15, HNRNPR, POLR2J, POLR2K, PTBP1, SF3A1, SNRPA1, SRRM1, SRSF3, U2AF1L5]	47.619	52.381	[CPSF1, CWC15, DHX15, GTF2F2, HNRNPA0, HNRNPH1, HNRNPL, HNRNPR, LSM5, POLR2J, POLR2K, PTBP1, RBM17, SF3A1, SF3B1, SNRPA1, SNRPD3, SRRM1, SRSF3, SRSF5, U2AF1L5]
R-HSA:72172	mRNA Splicing	REACTOME_Pathways_20.11.2017	7.24612e-06	0.00382595	2.13352e-08	1.06676e-07	[-1]	Group4	11.5183	22	None Specific Cluster	[CPSF1, GTF2F2, HNRNPA0, HNRNPH1, HNRNPL, LSM5, RBM17, SF3B1, SNRPD3, SRSF5, ZMAT5]	[CWC15, DHX15, HNRNPR, POLR2J, POLR2K, PTBP1, SF3A1, SNRPA1, SRRM1, SRSF3, U2AF1L5]	50	50	[CPSF1, CWC15, DHX15, GTF2F2, HNRNPA0, HNRNPH1, HNRNPL, HNRNPR, LSM5, POLR2J, POLR2K, PTBP1, RBM17, SF3A1, SF3B1, SNRPA1, SNRPD3, SRRM1, SRSF3, SRSF5, U2AF1L5, ZMAT5]
R-HSA:72203	Processing of Capped Intron-Containing Pre-mRNA	REACTOME_Pathways_20.11.2017	4.21378e-07	0.000234286	2.13352e-08	1.06676e-07	[-1]	Group4	11.5226	28	None Specific Cluster	[CPSF1, GTF2F2, HNRNPA0, HNRNPH1, HNRNPL, LSM5, NUP43, NXT1, POLDIP3, RBM17, SF3B1, SNRPD3, SRSF5, ZMAT5]	[CWC15, DHX15, EIF4E, HNRNPR, NUP58, POLR2J, POLR2K, PTBP1, SF3A1, SNRPA1, SRRM1, SRSF3, U2AF1L5, WTAP]	50	50	[CPSF1, CWC15, DHX15, EIF4E, GTF2F2, HNRNPA0, HNRNPH1, HNRNPL, HNRNPR, LSM5, NUP43, NUP58, NXT1, POLDIP3, POLR2J, POLR2K, PTBP1, RBM17, SF3A1, SF3B1, SNRPA1, SNRPD3, SRRM1, SRSF3, SRSF5, U2AF1L5, WTAP, ZMAT5]
R-HSA:8953854	Metabolism of RNA	REACTOME_Pathways_20.11.2017	5.1539e-07	0.000285526	2.13352e-08	1.06676e-07	[-1]	Group4	8.12408	55	None Specific Cluster	[CNOT3, CPSF1, EIF4A1, FBL, GTF2F2, HNRNPA0, HNRNPH1, HNRNPL, LSM5, NUP43, NXT1, POLDIP3, PSMA6, PSMB5, PSMB7, PSMD12, PSMD6, PSME3, RBM17, RPL3L, RPLP2, RPP38, RPS11, SF3B1, SNRPD3, SRSF5, TRMT112, WDR4, ZMAT5]	[CDK7, CNOT2, CTU2, CWC15, DHX15, EIF4E, GTF2H5, HNRNPR, NOL6, NUP58, POLR2J, POLR2K, POP5, PSMA2, PSMC4, PSMD9, PTBP1, RPL18, RPS15A, SF3A1, SNRPA1, SRRM1, SRSF3, U2AF1L5, UTP11, WTAP]	52.7273	47.2727	[CDK7, CNOT2, CNOT3, CPSF1, CTU2, CWC15, DHX15, EIF4A1, EIF4E, FBL, GTF2F2, GTF2H5, HNRNPA0, HNRNPH1, HNRNPL, HNRNPR, LSM5, NOL6, NUP43, NUP58, NXT1, POLDIP3, POLR2J, POLR2K, POP5, PSMA2, PSMA6, PSMB5, PSMB7, PSMC4, PSMD12, PSMD6, PSMD9, PSME3, PTBP1, RBM17, RPL18, RPL3L, RPLP2, RPP38, RPS11, RPS15A, SF3A1, SF3B1, SNRPA1, SNRPD3, SRRM1, SRSF3, SRSF5, TRMT112, U2AF1L5, UTP11, WDR4, WTAP, ZMAT5]
WP:411	mRNA Processing	WikiPathways_20.11.2017	6.06155e-07	0.000334598	2.13352e-08	1.06676e-07	[-1]	Group4	14.9606	19	None Specific Cluster	[CPSF1, HNRNPAB, HNRNPH1, HNRNPL, RBM17, SF3B1, SNRPD3, SPOP, SRSF5]	[CELF1, DHX15, HNRNPR, PTBP1, RBM39, SF3A1, SNRPA1, SRRM1, SRSF3, U2AF1L5]	47.3684	52.6316	[CELF1, CPSF1, DHX15, HNRNPAB, HNRNPH1, HNRNPL, HNRNPR, PTBP1, RBM17, RBM39, SF3A1, SF3B1, SNRPA1, SNRPD3, SPOP, SRRM1, SRSF3, SRSF5, U2AF1L5]
GO:0016071	mRNA metabolic process	GO_BiologicalProcess-EBI-QuickGO-GOA_20.11.2017_00h00	5.71715e-08	3.20732e-05	2.13352e-08	1.06676e-07	[5, 6, 7]	Group4	7.93839	67	None Specific Cluster	[CNOT3, CPSF1, DAZAP1, DDX41, DHX40, EIF4A1, GTF2F2, HNRNPA0, HNRNPH1, HNRNPL, LSM5, MOV10, POLDIP3, PRKACA, PSMA6, PSMB5, PSMB7, PSMD12, PSMD6, PSME3, RBM17, RBM4, RBMX2, RPLP2, RPS11, SF3B1, SLTM, SNRPD3, SRSF5, SUPT4H1, TRUB2, ZCCHC8, ZMAT5]	[CDK12, CDK7, CELF1, CNOT2, CWC15, DHX15, EIF4E, ESRP2, GTF2H5, HNRNPR, HSF1, KHDC4, NOVA2, POLR2J, POLR2K, PPP4R2, PSMA2, PSMC4, PSMD9, PTBP1, RBM39, RPL18, RPS15A, SAFB2, SF3A1, SNRPA1, SRRM1, SRSF3, SUPT6H, TRUB1, U2AF1L5, WTAP, ZHX2, ZMAT2]	49.2537	50.7463	[CDK12, CDK7, CELF1, CNOT2, CNOT3, CPSF1, CWC15, DAZAP1, DDX41, DHX15, DHX40, EIF4A1, EIF4E, ESRP2, GTF2F2, GTF2H5, HNRNPA0, HNRNPH1, HNRNPL, HNRNPR, HSF1, KHDC4, LSM5, MOV10, NOVA2, POLDIP3, POLR2J, POLR2K, PPP4R2, PRKACA, PSMA2, PSMA6, PSMB5, PSMB7, PSMC4, PSMD12, PSMD6, PSMD9, PSME3, PTBP1, RBM17, RBM39, RBM4, RBMX2, RPL18, RPLP2, RPS11, RPS15A, SAFB2, SF3A1, SF3B1, SLTM, SNRPA1, SNRPD3, SRRM1…
GO:0006397	mRNA processing	GO_BiologicalProcess-EBI-QuickGO-GOA_20.11.2017_00h00	8.24716e-08	4.61841e-05	2.13352e-08	1.06676e-07	[6, 7, 8]	Group4	9.25197	47	None Specific Cluster	[CPSF1, DAZAP1, DDX41, DHX40, GTF2F2, HNRNPA0, HNRNPH1, HNRNPL, LSM5, POLDIP3, PRKACA, RBM17, RBM4, RBMX2, SF3B1, SLTM, SNRPD3, SRSF5, SUPT4H1, TRUB2, ZCCHC8, ZMAT5]	[CDK12, CDK7, CELF1, CWC15, DHX15, ESRP2, GTF2H5, HNRNPR, HSF1, KHDC4, NOVA2, POLR2J, POLR2K, PPP4R2, PTBP1, RBM39, SAFB2, SF3A1, SNRPA1, SRRM1, SRSF3, SUPT6H, U2AF1L5, WTAP, ZMAT2]	46.8085	53.1915	[CDK12, CDK7, CELF1, CPSF1, CWC15, DAZAP1, DDX41, DHX15, DHX40, ESRP2, GTF2F2, GTF2H5, HNRNPA0, HNRNPH1, HNRNPL, HNRNPR, HSF1, KHDC4, LSM5, NOVA2, POLDIP3, POLR2J, POLR2K, PPP4R2, PRKACA, PTBP1, RBM17, RBM39, RBM4, RBMX2, SAFB2, SF3A1, SF3B1, SLTM, SNRPA1, SNRPD3, SRRM1, SRSF3, SRSF5, SUPT4H1, SUPT6H, TRUB2, U2AF1L5, WTAP, ZCCHC8, ZMAT2, ZMAT5]
GO:0008380	RNA splicing	GO_BiologicalProcess-EBI-QuickGO-GOA_20.11.2017_00h00	3.42083e-06	0.00184382	2.13352e-08	1.06676e-07	[6, 7, 8]	Group4	8.76404	39	None Specific Cluster	[CPSF1, DAZAP1, DDX41, DHX40, GTF2F2, HNRNPA0, HNRNPH1, HNRNPL, LSM5, RBM17, RBM4, RBMX2, RRAGC, SF3B1, SNRPD3, SRSF5, ZCCHC8, ZMAT5]	[CDK12, CELF1, CWC15, DHX15, ESRP2, HNRNPR, KHDC4, NOVA2, POLR2J, POLR2K, PPP4R2, PTBP1, RBM39, SF3A1, SNRPA1, SRRM1, SRSF3, SUPT6H, U2AF1L5, WTAP, ZMAT2]	46.1538	53.8462	[CDK12, CELF1, CPSF1, CWC15, DAZAP1, DDX41, DHX15, DHX40, ESRP2, GTF2F2, HNRNPA0, HNRNPH1, HNRNPL, HNRNPR, KHDC4, LSM5, NOVA2, POLR2J, POLR2K, PPP4R2, PTBP1, RBM17, RBM39, RBM4, RBMX2, RRAGC, SF3A1, SF3B1, SNRPA1, SNRPD3, SRRM1, SRSF3, SRSF5, SUPT6H, U2AF1L5, WTAP, ZCCHC8, ZMAT2, ZMAT5]
GO:0000398	mRNA splicing, via spliceosome	GO_BiologicalProcess-EBI-QuickGO-GOA_20.11.2017_00h00	4.25857e-07	0.000236351	2.13352e-08	1.06676e-07	[7, 8, 9, 10, 11]	Group4	10.241	34	None Specific Cluster	[CPSF1, DAZAP1, DDX41, DHX40, GTF2F2, HNRNPA0, HNRNPH1, HNRNPL, LSM5, RBM17, RBM4, RBMX2, SF3B1, SNRPD3, SRSF5, ZCCHC8, ZMAT5]	[CELF1, CWC15, DHX15, ESRP2, HNRNPR, KHDC4, NOVA2, POLR2J, POLR2K, PTBP1, SF3A1, SNRPA1, SRRM1, SRSF3, U2AF1L5, WTAP, ZMAT2]	50	50	[CELF1, CPSF1, CWC15, DAZAP1, DDX41, DHX15, DHX40, ESRP2, GTF2F2, HNRNPA0, HNRNPH1, HNRNPL, HNRNPR, KHDC4, LSM5, NOVA2, POLR2J, POLR2K, PTBP1, RBM17, RBM4, RBMX2, SF3A1, SF3B1, SNRPA1, SNRPD3, SRRM1, SRSF3, SRSF5, U2AF1L5, WTAP, ZCCHC8, ZMAT2, ZMAT5]
R-HSA:5368286	Mitochondrial translation initiation	REACTOME_Pathways_20.11.2017	1.27433e-06	0.000697058	2.62539e-07	1.05015e-06	[-1]	Group5	17.4419	15	Specific for Cluster #2	[MRPL46, MRPL57, MRPS25, MRPS36]	[MRPL22, MRPL27, MRPL28, MRPL35, MRPL40, MRPL41, MRPL49, MRPL55, MRPL9, MRPS18A, MRPS34]	26.6667	73.3333	[MRPL22, MRPL27, MRPL28, MRPL35, MRPL40, MRPL41, MRPL46, MRPL49, MRPL55, MRPL57, MRPL9, MRPS18A, MRPS25, MRPS34, MRPS36]
R-HSA:5368287	Mitochondrial translation	REACTOME_Pathways_20.11.2017	3.07465e-06	0.00166338	2.62539e-07	1.05015e-06	[-1]	Group5	16.3043	15	Specific for Cluster #2	[MRPL46, MRPL57, MRPS25, MRPS36]	[MRPL22, MRPL27, MRPL28, MRPL35, MRPL40, MRPL41, MRPL49, MRPL55, MRPL9, MRPS18A, MRPS34]	26.6667	73.3333	[MRPL22, MRPL27, MRPL28, MRPL35, MRPL40, MRPL41, MRPL46, MRPL49, MRPL55, MRPL57, MRPL9, MRPS18A, MRPS25, MRPS34, MRPS36]
R-HSA:5389840	Mitochondrial translation elongation	REACTOME_Pathways_20.11.2017	1.27433e-06	0.000697058	2.62539e-07	1.05015e-06	[-1]	Group5	17.4419	15	Specific for Cluster #2	[MRPL46, MRPL57, MRPS25, MRPS36]	[MRPL22, MRPL27, MRPL28, MRPL35, MRPL40, MRPL41, MRPL49, MRPL55, MRPL9, MRPS18A, MRPS34]	26.6667	73.3333	[MRPL22, MRPL27, MRPL28, MRPL35, MRPL40, MRPL41, MRPL46, MRPL49, MRPL55, MRPL57, MRPL9, MRPS18A, MRPS25, MRPS34, MRPS36]
R-HSA:5419276	Mitochondrial translation termination	REACTOME_Pathways_20.11.2017	1.27433e-06	0.000697058	2.62539e-07	1.05015e-06	[-1]	Group5	17.4419	15	Specific for Cluster #2	[MRPL46, MRPL57, MRPS25, MRPS36]	[MRPL22, MRPL27, MRPL28, MRPL35, MRPL40, MRPL41, MRPL49, MRPL55, MRPL9, MRPS18A, MRPS34]	26.6667	73.3333	[MRPL22, MRPL27, MRPL28, MRPL35, MRPL40, MRPL41, MRPL46, MRPL49, MRPL55, MRPL57, MRPL9, MRPS18A, MRPS25, MRPS34, MRPS36]
R-HSA:72766	Translation	REACTOME_Pathways_20.11.2017	6.32062e-07	0.000348266	2.62539e-07	1.05015e-06	[-1]	Group5	10.6164	31	None Specific Cluster	[AIMP1, DARS, EEF2, EIF4A1, MRPL46, MRPL57, MRPS25, MRPS36, RPL3L, RPLP2, RPS11, SPCS1, SRP14, TRMT112]	[EIF4E, EIF4H, MRPL22, MRPL27, MRPL28, MRPL35, MRPL40, MRPL41, MRPL49, MRPL55, MRPL9, MRPS18A, MRPS34, RPL18, RPS15A, SEC11A, SRP19]	45.1613	54.8387	[AIMP1, DARS, EEF2, EIF4A1, EIF4E, EIF4H, MRPL22, MRPL27, MRPL28, MRPL35, MRPL40, MRPL41, MRPL46, MRPL49, MRPL55, MRPL57, MRPL9, MRPS18A, MRPS25, MRPS34, MRPS36, RPL18, RPL3L, RPLP2, RPS11, RPS15A, SEC11A, SPCS1, SRP14, SRP19, TRMT112]
GO:0043604	amide biosynthetic process	GO_BiologicalProcess-EBI-QuickGO-GOA_20.11.2017_00h00	2.0436e-06	0.00110968	2.62539e-07	1.05015e-06	[5]	Group5	7.46634	61	None Specific Cluster	[AIMP1, ASNSD1, B3GALT2, CNOT3, DARS, EEF2, EIF4A1, EIF6, GAPDH, GCH1, HIST2H3A, MOV10, MRPL46, MRPL57, MRPS25, MRPS36, NUP43, ORMDL2, POLDIP3, PPP1CA, PPP3CA, RBM4, RPL3L, RPLP2, RPS11, RWDD1, SMAD2, TRMT112]	[C12orf65, CELF1, CERS2, CNOT2, COA3, EIF4E, EIF4H, HNRNPR, LIN28A, MRPL22, MRPL27, MRPL28, MRPL35, MRPL40, MRPL41, MRPL49, MRPL55, MRPL9, MRPS18A, MRPS34, MTHFD1, NSMAF, NUP58, OGFOD1, ORMDL3, PAIP2, POLR2J, POLR2K, RNF139, RPL18, RPS15A, SMAD1, YTHDF1]	45.9016	54.0984	[AIMP1, ASNSD1, B3GALT2, C12orf65, CELF1, CERS2, CNOT2, CNOT3, COA3, DARS, EEF2, EIF4A1, EIF4E, EIF4H, EIF6, GAPDH, GCH1, HIST2H3A, HNRNPR, LIN28A, MOV10, MRPL22, MRPL27, MRPL28, MRPL35, MRPL40, MRPL41, MRPL46, MRPL49, MRPL55, MRPL57, MRPL9, MRPS18A, MRPS25, MRPS34, MRPS36, MTHFD1, NSMAF, NUP43, NUP58, OGFOD1, ORMDL2, ORMDL3, PAIP2, POLDIP3, POLR2J, POLR2K, PPP1CA, PPP3CA, RBM4, RNF139, RPL18, RP…
GO:0006412	translation	GO_BiologicalProcess-EBI-QuickGO-GOA_20.11.2017_00h00	7.08758e-06	0.00374933	2.62539e-07	1.05015e-06	[5, 6, 7]	Group5	7.52841	53	None Specific Cluster	[AIMP1, CNOT3, DARS, EEF2, EIF4A1, EIF6, GAPDH, HIST2H3A, MOV10, MRPL46, MRPL57, MRPS25, MRPS36, NUP43, POLDIP3, PPP1CA, PPP3CA, RBM4, RPL3L, RPLP2, RPS11, RWDD1, SMAD2, TRMT112]	[C12orf65, CELF1, CNOT2, COA3, EIF4E, EIF4H, HNRNPR, LIN28A, MRPL22, MRPL27, MRPL28, MRPL35, MRPL40, MRPL41, MRPL49, MRPL55, MRPL9, MRPS18A, MRPS34, NUP58, OGFOD1, PAIP2, POLR2J, POLR2K, RNF139, RPL18, RPS15A, SMAD1, YTHDF1]	45.283	54.717	[AIMP1, C12orf65, CELF1, CNOT2, CNOT3, COA3, DARS, EEF2, EIF4A1, EIF4E, EIF4H, EIF6, GAPDH, HIST2H3A, HNRNPR, LIN28A, MOV10, MRPL22, MRPL27, MRPL28, MRPL35, MRPL40, MRPL41, MRPL46, MRPL49, MRPL55, MRPL57, MRPL9, MRPS18A, MRPS25, MRPS34, MRPS36, NUP43, NUP58, OGFOD1, PAIP2, POLDIP3, POLR2J, POLR2K, PPP1CA, PPP3CA, RBM4, RNF139, RPL18, RPL3L, RPLP2, RPS11, RPS15A, RWDD1, SMAD1, SMAD2, TRMT112, YTHD…
GO:0006414	translational elongation	GO_BiologicalProcess-EBI-QuickGO-GOA_20.11.2017_00h00	4.65331e-06	0.00249417	2.62539e-07	1.05015e-06	[5, 6, 7, 8]	Group5	13.6364	18	Specific for Cluster #2	[EEF2, MRPL46, MRPL57, MRPS25, MRPS36, RPLP2]	[C12orf65, MRPL22, MRPL27, MRPL28, MRPL35, MRPL40, MRPL41, MRPL49, MRPL55, MRPL9, MRPS18A, MRPS34]	33.3333	66.6667	[C12orf65, EEF2, MRPL22, MRPL27, MRPL28, MRPL35, MRPL40, MRPL41, MRPL46, MRPL49, MRPL55, MRPL57, MRPL9, MRPS18A, MRPS25, MRPS34, MRPS36, RPLP2]
GO:0006415	translational termination	GO_BiologicalProcess-EBI-QuickGO-GOA_20.11.2017_00h00	1.08855e-07	6.085e-05	2.62539e-07	1.05015e-06	[6, 7, 8]	Group5	17.4757	18	Specific for Cluster #2	[MRPL46, MRPL57, MRPS25, MRPS36, TRMT112]	[C12orf65, MRPL22, MRPL27, MRPL28, MRPL35, MRPL40, MRPL41, MRPL49, MRPL55, MRPL9, MRPS18A, MRPS34, OGFOD1]	27.7778	72.2222	[C12orf65, MRPL22, MRPL27, MRPL28, MRPL35, MRPL40, MRPL41, MRPL46, MRPL49, MRPL55, MRPL57, MRPL9, MRPS18A, MRPS25, MRPS34, MRPS36, OGFOD1, TRMT112]
GO:0032543	mitochondrial translation	GO_BiologicalProcess-EBI-QuickGO-GOA_20.11.2017_00h00	7.90977e-06	0.00415263	2.62539e-07	1.05015e-06	[6, 7, 8]	Group5	13.7097	17	Specific for Cluster #2	[MRPL46, MRPL57, MRPS25, MRPS36]	[C12orf65, COA3, MRPL22, MRPL27, MRPL28, MRPL35, MRPL40, MRPL41, MRPL49, MRPL55, MRPL9, MRPS18A, MRPS34]	23.5294	76.4706	[C12orf65, COA3, MRPL22, MRPL27, MRPL28, MRPL35, MRPL40, MRPL41, MRPL46, MRPL49, MRPL55, MRPL57, MRPL9, MRPS18A, MRPS25, MRPS34, MRPS36]
GO:0070125	mitochondrial translational elongation	GO_BiologicalProcess-EBI-QuickGO-GOA_20.11.2017_00h00	1.48427e-06	0.000810411	2.62539e-07	1.05015e-06	[6, 7, 8, 9]	Group5	17.2414	15	Specific for Cluster #2	[MRPL46, MRPL57, MRPS25, MRPS36]	[MRPL22, MRPL27, MRPL28, MRPL35, MRPL40, MRPL41, MRPL49, MRPL55, MRPL9, MRPS18A, MRPS34]	26.6667	73.3333	[MRPL22, MRPL27, MRPL28, MRPL35, MRPL40, MRPL41, MRPL46, MRPL49, MRPL55, MRPL57, MRPL9, MRPS18A, MRPS25, MRPS34, MRPS36]
R-HSA:1168372	Downstream signaling events of B Cell Receptor (BCR)	REACTOME_Pathways_20.11.2017	2.17089e-05	0.0111367	5.28046e-12	3.69632e-11	[-1]	Group6	15.6627	13	Specific for Cluster #1	[IKBKB, PPP3CA, PSMA6, PSMB5, PSMB7, PSMD12, PSMD6, PSME3]	[CALM3, CUL1, PSMA2, PSMC4, PSMD9]	61.5385	38.4615	[CALM3, CUL1, IKBKB, PPP3CA, PSMA2, PSMA6, PSMB5, PSMB7, PSMC4, PSMD12, PSMD6, PSMD9, PSME3]
R-HSA:1169091	Activation of NF-kappaB in B cells	REACTOME_Pathways_20.11.2017	5.92243e-05	0.0292568	5.28046e-12	3.69632e-11	[-1]	Group6	16.4179	11	Specific for Cluster #1	[IKBKB, PSMA6, PSMB5, PSMB7, PSMD12, PSMD6, PSME3]	[CUL1, PSMA2, PSMC4, PSMD9]	63.6364	36.3636	[CUL1, IKBKB, PSMA2, PSMA6, PSMB5, PSMB7, PSMC4, PSMD12, PSMD6, PSMD9, PSME3]
R-HSA:1640170	Cell Cycle	REACTOME_Pathways_20.11.2017	6.57084e-06	0.00349569	5.28046e-12	3.69632e-11	[-1]	Group6	7.78816	50	None Specific Cluster	[CDK6, CDKN2B, CETN2, DYNLL2, GINS1, HDAC1, HIST2H3A, MZT2B, NDE1, NUF2, NUP43, PCM1, POLD3, POLE3, PRKACA, PSMA6, PSMB5, PSMB7, PSMD12, PSMD6, PSME3, RNF168, SEC13, UBE2D1, UBE2I, WRAP53, YWHAE]	[ANAPC11, BABAM1, CDC26, CDK7, CUL1, DCTN2, DYNC1I2, ESCO1, FZR1, KMT5A, LIN37, NEDD1, NUP58, PSMA2, PSMC4, PSMD9, RAB1B, RAB2A, RPA1, STAG2, SUN2, SYCP3, WAPL]	54	46	[ANAPC11, BABAM1, CDC26, CDK6, CDK7, CDKN2B, CETN2, CUL1, DCTN2, DYNC1I2, DYNLL2, ESCO1, FZR1, GINS1, HDAC1, HIST2H3A, KMT5A, LIN37, MZT2B, NDE1, NEDD1, NUF2, NUP43, NUP58, PCM1, POLD3, POLE3, PRKACA, PSMA2, PSMA6, PSMB5, PSMB7, PSMC4, PSMD12, PSMD6, PSMD9, PSME3, RAB1B, RAB2A, RNF168, RPA1, SEC13, STAG2, SUN2, SYCP3, UBE2D1, UBE2I, WAPL, WRAP53, YWHAE]
R-HSA:174084	Autodegradation of Cdh1 by Cdh1:APC/C	REACTOME_Pathways_20.11.2017	8.90234e-07	0.000487848	5.28046e-12	3.69632e-11	[-1]	Group6	20.6349	13	None Specific Cluster	[PSMA6, PSMB5, PSMB7, PSMD12, PSMD6, PSME3, UBE2D1]	[ANAPC11, CDC26, FZR1, PSMA2, PSMC4, PSMD9]	53.8462	46.1538	[ANAPC11, CDC26, FZR1, PSMA2, PSMA6, PSMB5, PSMB7, PSMC4, PSMD12, PSMD6, PSMD9, PSME3, UBE2D1]
R-HSA:174113	SCF-beta-TrCP mediated degradation of Emi1	REACTOME_Pathways_20.11.2017	8.492e-06	0.00444981	5.28046e-12	3.69632e-11	[-1]	Group6	20	11	None Specific Cluster	[PSMA6, PSMB5, PSMB7, PSMD12, PSMD6, PSME3]	[CUL1, FZR1, PSMA2, PSMC4, PSMD9]	54.5455	45.4545	[CUL1, FZR1, PSMA2, PSMA6, PSMB5, PSMB7, PSMC4, PSMD12, PSMD6, PSMD9, PSME3]
R-HSA:174143	APC/C-mediated degradation of cell cycle proteins	REACTOME_Pathways_20.11.2017	6.65475e-06	0.00353367	5.28046e-12	3.69632e-11	[-1]	Group6	16.2791	14	None Specific Cluster	[PSMA6, PSMB5, PSMB7, PSMD12, PSMD6, PSME3, UBE2D1]	[ANAPC11, CDC26, CUL1, FZR1, PSMA2, PSMC4, PSMD9]	50	50	[ANAPC11, CDC26, CUL1, FZR1, PSMA2, PSMA6, PSMB5, PSMB7, PSMC4, PSMD12, PSMD6, PSMD9, PSME3, UBE2D1]
R-HSA:174154	APC/C:Cdc20 mediated degradation of Securin	REACTOME_Pathways_20.11.2017	1.10273e-05	0.00573422	5.28046e-12	3.69632e-11	[-1]	Group6	17.9104	12	None Specific Cluster	[PSMA6, PSMB5, PSMB7, PSMD12, PSMD6, PSME3, UBE2D1]	[ANAPC11, CDC26, PSMA2, PSMC4, PSMD9]	58.3333	41.6667	[ANAPC11, CDC26, PSMA2, PSMA6, PSMB5, PSMB7, PSMC4, PSMD12, PSMD6, PSMD9, PSME3, UBE2D1]
R-HSA:174178	APC/C:Cdh1 mediated degradation of Cdc20 and other APC/C:Cdh1 targeted proteins in late mitosis/early G1	REACTOME_Pathways_20.11.2017	4.3428e-06	0.00233209	5.28046e-12	3.69632e-11	[-1]	Group6	18.0556	13	None Specific Cluster	[PSMA6, PSMB5, PSMB7, PSMD12, PSMD6, PSME3, UBE2D1]	[ANAPC11, CDC26, FZR1, PSMA2, PSMC4, PSMD9]	53.8462	46.1538	[ANAPC11, CDC26, FZR1, PSMA2, PSMA6, PSMB5, PSMB7, PSMC4, PSMD12, PSMD6, PSMD9, PSME3, UBE2D1]
R-HSA:174184	Cdc20:Phospho-APC/C mediated degradation of Cyclin A	REACTOME_Pathways_20.11.2017	2.35729e-05	0.0120693	5.28046e-12	3.69632e-11	[-1]	Group6	16.6667	12	None Specific Cluster	[PSMA6, PSMB5, PSMB7, PSMD12, PSMD6, PSME3, UBE2D1]	[ANAPC11, CDC26, PSMA2, PSMC4, PSMD9]	58.3333	41.6667	[ANAPC11, CDC26, PSMA2, PSMA6, PSMB5, PSMB7, PSMC4, PSMD12, PSMD6, PSMD9, PSME3, UBE2D1]
R-HSA:176408	Regulation of APC/C activators between G1/S and early anaphase	REACTOME_Pathways_20.11.2017	2.75413e-06	0.00149274	5.28046e-12	3.69632e-11	[-1]	Group6	17.5	14	None Specific Cluster	[PSMA6, PSMB5, PSMB7, PSMD12, PSMD6, PSME3, UBE2D1]	[ANAPC11, CDC26, CUL1, FZR1, PSMA2, PSMC4, PSMD9]	50	50	[ANAPC11, CDC26, CUL1, FZR1, PSMA2, PSMA6, PSMB5, PSMB7, PSMC4, PSMD12, PSMD6, PSMD9, PSME3, UBE2D1]
R-HSA:176409	APC/C:Cdc20 mediated degradation of mitotic proteins	REACTOME_Pathways_20.11.2017	3.59624e-05	0.0183049	5.28046e-12	3.69632e-11	[-1]	Group6	16	12	None Specific Cluster	[PSMA6, PSMB5, PSMB7, PSMD12, PSMD6, PSME3, UBE2D1]	[ANAPC11, CDC26, PSMA2, PSMC4, PSMD9]	58.3333	41.6667	[ANAPC11, CDC26, PSMA2, PSMA6, PSMB5, PSMB7, PSMC4, PSMD12, PSMD6, PSMD9, PSME3, UBE2D1]
R-HSA:176814	Activation of APC/C and APC/C:Cdc20 mediated degradation of mitotic proteins	REACTOME_Pathways_20.11.2017	4.11893e-05	0.0207182	5.28046e-12	3.69632e-11	[-1]	Group6	15.7895	12	None Specific Cluster	[PSMA6, PSMB5, PSMB7, PSMD12, PSMD6, PSME3, UBE2D1]	[ANAPC11, CDC26, PSMA2, PSMC4, PSMD9]	58.3333	41.6667	[ANAPC11, CDC26, PSMA2, PSMA6, PSMB5, PSMB7, PSMC4, PSMD12, PSMD6, PSMD9, PSME3, UBE2D1]
R-HSA:179419	APC:Cdc20 mediated degradation of cell cycle proteins prior to satisfation of the cell cycle checkpoint	REACTOME_Pathways_20.11.2017	2.7208e-05	0.0139033	5.28046e-12	3.69632e-11	[-1]	Group6	16.4384	12	None Specific Cluster	[PSMA6, PSMB5, PSMB7, PSMD12, PSMD6, PSME3, UBE2D1]	[ANAPC11, CDC26, PSMA2, PSMC4, PSMD9]	58.3333	41.6667	[ANAPC11, CDC26, PSMA2, PSMA6, PSMB5, PSMB7, PSMC4, PSMD12, PSMD6, PSMD9, PSME3, UBE2D1]
R-HSA:2454202	Fc epsilon receptor (FCERI) signaling	REACTOME_Pathways_20.11.2017	8.1281e-05	0.0395026	5.28046e-12	3.69632e-11	[-1]	Group6	11.9403	16	None Specific Cluster	[IKBKB, PPP3CA, PSMA6, PSMB5, PSMB7, PSMD12, PSMD6, PSME3, UBE2D1]	[CALM3, CDC34, CUL1, PAK1, PSMA2, PSMC4, PSMD9]	56.25	43.75	[CALM3, CDC34, CUL1, IKBKB, PAK1, PPP3CA, PSMA2, PSMA6, PSMB5, PSMB7, PSMC4, PSMD12, PSMD6, PSMD9, PSME3, UBE2D1]
R-HSA:2467813	Separation of Sister Chromatids	REACTOME_Pathways_20.11.2017	7.35867e-05	0.0359103	5.28046e-12	3.69632e-11	[-1]	Group6	10.4712	20	Specific for Cluster #1	[DYNLL2, NDE1, NUF2, NUP43, PSMA6, PSMB5, PSMB7, PSMD12, PSMD6, PSME3, SEC13, UBE2D1]	[ANAPC11, CDC26, DYNC1I2, PSMA2, PSMC4, PSMD9, STAG2, WAPL]	60	40	[ANAPC11, CDC26, DYNC1I2, DYNLL2, NDE1, NUF2, NUP43, PSMA2, PSMA6, PSMB5, PSMB7, PSMC4, PSMD12, PSMD6, PSMD9, PSME3, SEC13, STAG2, UBE2D1, WAPL]
R-HSA:2871837	FCERI mediated NF-kB activation	REACTOME_Pathways_20.11.2017	1.89866e-05	0.00977808	5.28046e-12	3.69632e-11	[-1]	Group6	15.8537	13	Specific for Cluster #1	[IKBKB, PSMA6, PSMB5, PSMB7, PSMD12, PSMD6, PSME3, UBE2D1]	[CDC34, CUL1, PSMA2, PSMC4, PSMD9]	61.5385	38.4615	[CDC34, CUL1, IKBKB, PSMA2, PSMA6, PSMB5, PSMB7, PSMC4, PSMD12, PSMD6, PSMD9, PSME3, UBE2D1]
R-HSA:453274	Mitotic G2-G2/M phases	REACTOME_Pathways_20.11.2017	4.05871e-05	0.0204559	5.28046e-12	3.69632e-11	[-1]	Group6	10.6061	21	None Specific Cluster	[CETN2, MZT2B, NDE1, PCM1, PRKACA, PSMA6, PSMB5, PSMB7, PSMD12, PSMD6, PSME3, YWHAE]	[CDK7, CUL1, DCTN2, DYNC1I2, LIN37, NEDD1, PSMA2, PSMC4, PSMD9]	57.1429	42.8571	[CDK7, CETN2, CUL1, DCTN2, DYNC1I2, LIN37, MZT2B, NDE1, NEDD1, PCM1, PRKACA, PSMA2, PSMA6, PSMB5, PSMB7, PSMC4, PSMD12, PSMD6, PSMD9, PSME3, YWHAE]
R-HSA:453276	Regulation of mitotic cell cycle	REACTOME_Pathways_20.11.2017	6.65475e-06	0.00353367	5.28046e-12	3.69632e-11	[-1]	Group6	16.2791	14	None Specific Cluster	[PSMA6, PSMB5, PSMB7, PSMD12, PSMD6, PSME3, UBE2D1]	[ANAPC11, CDC26, CUL1, FZR1, PSMA2, PSMC4, PSMD9]	50	50	[ANAPC11, CDC26, CUL1, FZR1, PSMA2, PSMA6, PSMB5, PSMB7, PSMC4, PSMD12, PSMD6, PSMD9, PSME3, UBE2D1]
R-HSA:453279	Mitotic G1-G1/S phases	REACTOME_Pathways_20.11.2017	7.37956e-05	0.0359384	5.28046e-12	3.69632e-11	[-1]	Group6	11.5646	17	None Specific Cluster	[CDK6, CDKN2B, HDAC1, POLE3, PSMA6, PSMB5, PSMB7, PSMD12, PSMD6, PSME3]	[CDK7, CUL1, LIN37, PSMA2, PSMC4, PSMD9, RPA1]	58.8235	41.1765	[CDK6, CDK7, CDKN2B, CUL1, HDAC1, LIN37, POLE3, PSMA2, PSMA6, PSMB5, PSMB7, PSMC4, PSMD12, PSMD6, PSMD9, PSME3, RPA1]
R-HSA:4641258	Degradation of DVL	REACTOME_Pathways_20.11.2017	7.13931e-05	0.0349112	5.28046e-12	3.69632e-11	[-1]	Group6	17.5439	10	Specific for Cluster #1	[CUL3, PSMA6, PSMB5, PSMB7, PSMD12, PSMD6, PSME3]	[PSMA2, PSMC4, PSMD9]	70	30	[CUL3, PSMA2, PSMA6, PSMB5, PSMB7, PSMC4, PSMD12, PSMD6, PSMD9, PSME3]
R-HSA:5607764	CLEC7A (Dectin-1) signaling	REACTOME_Pathways_20.11.2017	1.00368e-05	0.00522916	5.28046e-12	3.69632e-11	[-1]	Group6	14.8515	15	Specific for Cluster #1	[IKBKB, PPP3CA, PSMA6, PSMB5, PSMB7, PSMD12, PSMD6, PSME3, UBE2D1]	[CALM3, CDC34, CUL1, PSMA2, PSMC4, PSMD9]	60	40	[CALM3, CDC34, CUL1, IKBKB, PPP3CA, PSMA2, PSMA6, PSMB5, PSMB7, PSMC4, PSMD12, PSMD6, PSMD9, PSME3, UBE2D1]
R-HSA:5610780	Degradation of GLI1 by the proteasome	REACTOME_Pathways_20.11.2017	2.03138e-05	0.0104413	5.28046e-12	3.69632e-11	[-1]	Group6	18.3333	11	Specific for Cluster #1	[PRKACA, PSMA6, PSMB5, PSMB7, PSMD12, PSMD6, PSME3]	[CUL1, PSMA2, PSMC4, PSMD9]	63.6364	36.3636	[CUL1, PRKACA, PSMA2, PSMA6, PSMB5, PSMB7, PSMC4, PSMD12, PSMD6, PSMD9, PSME3]
R-HSA:5610783	Degradation of GLI2 by the proteasome	REACTOME_Pathways_20.11.2017	2.03138e-05	0.0104413	5.28046e-12	3.69632e-11	[-1]	Group6	18.3333	11	Specific for Cluster #1	[PRKACA, PSMA6, PSMB5, PSMB7, PSMD12, PSMD6, PSME3]	[CUL1, PSMA2, PSMC4, PSMD9]	63.6364	36.3636	[CUL1, PRKACA, PSMA2, PSMA6, PSMB5, PSMB7, PSMC4, PSMD12, PSMD6, PSMD9, PSME3]
R-HSA:5610785	GLI3 is processed to GLI3R by the proteasome	REACTOME_Pathways_20.11.2017	2.03138e-05	0.0104413	5.28046e-12	3.69632e-11	[-1]	Group6	18.3333	11	Specific for Cluster #1	[PRKACA, PSMA6, PSMB5, PSMB7, PSMD12, PSMD6, PSME3]	[CUL1, PSMA2, PSMC4, PSMD9]	63.6364	36.3636	[CUL1, PRKACA, PSMA2, PSMA6, PSMB5, PSMB7, PSMC4, PSMD12, PSMD6, PSMD9, PSME3]
R-HSA:5621481	C-type lectin receptors (CLRs)	REACTOME_Pathways_20.11.2017	5.20021e-05	0.025845	5.28046e-12	3.69632e-11	[-1]	Group6	11.8881	17	None Specific Cluster	[IKBKB, PPP3CA, PRKACA, PSMA6, PSMB5, PSMB7, PSMD12, PSMD6, PSME3, UBE2D1]	[CALM3, CDC34, CUL1, PAK1, PSMA2, PSMC4, PSMD9]	58.8235	41.1765	[CALM3, CDC34, CUL1, IKBKB, PAK1, PPP3CA, PRKACA, PSMA2, PSMA6, PSMB5, PSMB7, PSMC4, PSMD12, PSMD6, PSMD9, PSME3, UBE2D1]
R-HSA:5676590	NIK-->noncanonical NF-kB signaling	REACTOME_Pathways_20.11.2017	9.67241e-05	0.046621	5.28046e-12	3.69632e-11	[-1]	Group6	16.9492	10	Specific for Cluster #1	[PSMA6, PSMB5, PSMB7, PSMD12, PSMD6, PSME3]	[CUL1, PSMA2, PSMC4, PSMD9]	60	40	[CUL1, PSMA2, PSMA6, PSMB5, PSMB7, PSMC4, PSMD12, PSMD6, PSMD9, PSME3]
R-HSA:5687128	MAPK6/MAPK4 signaling	REACTOME_Pathways_20.11.2017	1.00299e-05	0.00523559	5.28046e-12	3.69632e-11	[-1]	Group6	15.7303	14	Specific for Cluster #1	[CDC42, DNAJB1, MOV10, PRKACA, PSMA6, PSMB5, PSMB7, PSMD12, PSMD6, PSME3]	[PAK1, PSMA2, PSMC4, PSMD9]	71.4286	28.5714	[CDC42, DNAJB1, MOV10, PAK1, PRKACA, PSMA2, PSMA6, PSMB5, PSMB7, PSMC4, PSMD12, PSMD6, PSMD9, PSME3]
R-HSA:5688426	Deubiquitination	REACTOME_Pathways_20.11.2017	7.63853e-06	0.00401787	5.28046e-12	3.69632e-11	[-1]	Group6	9.76431	29	None Specific Cluster	[ACTR8, BECN1, HCFC1, KEAP1, NFRKB, PSMA6, PSMB5, PSMB7, PSMD12, PSMD6, PSME3, RAD23A, SMAD2, SUDS3, TFPT, UBE2D1, USP19]	[BABAM1, JOSD1, MBD6, MUL1, PSMA2, PSMC4, PSMD9, SMAD1, TADA3, TRIM25, USP7, VDAC1]	58.6207	41.3793	[ACTR8, BABAM1, BECN1, HCFC1, JOSD1, KEAP1, MBD6, MUL1, NFRKB, PSMA2, PSMA6, PSMB5, PSMB7, PSMC4, PSMD12, PSMD6, PSMD9, PSME3, RAD23A, SMAD1, SMAD2, SUDS3, TADA3, TFPT, TRIM25, UBE2D1, USP19, USP7, VDAC1]
R-HSA:5689603	UCH proteinases	REACTOME_Pathways_20.11.2017	4.86215e-05	0.0242622	5.28046e-12	3.69632e-11	[-1]	Group6	13.7255	14	Specific for Cluster #1	[ACTR8, HCFC1, NFRKB, PSMA6, PSMB5, PSMB7, PSMD12, PSMD6, PSME3, TFPT]	[MBD6, PSMA2, PSMC4, PSMD9]	71.4286	28.5714	[ACTR8, HCFC1, MBD6, NFRKB, PSMA2, PSMA6, PSMB5, PSMB7, PSMC4, PSMD12, PSMD6, PSMD9, PSME3, TFPT]
R-HSA:6807070	PTEN Regulation	REACTOME_Pathways_20.11.2017	3.96084e-05	0.0200418	5.28046e-12	3.69632e-11	[-1]	Group6	12.1429	17	Specific for Cluster #1	[GATAD2B, HDAC1, LAMTOR2, MOV10, PSMA6, PSMB5, PSMB7, PSMD12, PSMD6, PSME3, RING1, RRAGC, STUB1]	[PSMA2, PSMC4, PSMD9, USP7]	76.4706	23.5294	[GATAD2B, HDAC1, LAMTOR2, MOV10, PSMA2, PSMA6, PSMB5, PSMB7, PSMC4, PSMD12, PSMD6, PSMD9, PSME3, RING1, RRAGC, STUB1, USP7]
R-HSA:69202	Cyclin E associated events during G1/S transition	REACTOME_Pathways_20.11.2017	8.8572e-05	0.0428688	5.28046e-12	3.69632e-11	[-1]	Group6	14.6341	12	None Specific Cluster	[PSMA6, PSMB5, PSMB7, PSMD12, PSMD6, PSME3]	[CDK7, CUL1, LIN37, PSMA2, PSMC4, PSMD9]	50	50	[CDK7, CUL1, LIN37, PSMA2, PSMA6, PSMB5, PSMB7, PSMC4, PSMD12, PSMD6, PSMD9, PSME3]
R-HSA:69239	Synthesis of DNA	REACTOME_Pathways_20.11.2017	3.88658e-05	0.0197438	5.28046e-12	3.69632e-11	[-1]	Group6	14	14	Specific for Cluster #1	[GINS1, POLD3, POLE3, PSMA6, PSMB5, PSMB7, PSMD12, PSMD6, PSME3]	[FZR1, PSMA2, PSMC4, PSMD9, RPA1]	64.2857	35.7143	[FZR1, GINS1, POLD3, POLE3, PSMA2, PSMA6, PSMB5, PSMB7, PSMC4, PSMD12, PSMD6, PSMD9, PSME3, RPA1]
R-HSA:69242	S Phase	REACTOME_Pathways_20.11.2017	5.85378e-07	0.000323714	5.28046e-12	3.69632e-11	[-1]	Group6	14.3885	20	None Specific Cluster	[GINS1, POLD3, POLE3, PSMA6, PSMB5, PSMB7, PSMD12, PSMD6, PSME3]	[CDK7, CUL1, ESCO1, FZR1, LIN37, PSMA2, PSMC4, PSMD9, RPA1, STAG2, WAPL]	45	55	[CDK7, CUL1, ESCO1, FZR1, GINS1, LIN37, POLD3, POLE3, PSMA2, PSMA6, PSMB5, PSMB7, PSMC4, PSMD12, PSMD6, PSMD9, PSME3, RPA1, STAG2, WAPL]
R-HSA:69275	G2/M Transition	REACTOME_Pathways_20.11.2017	3.49085e-05	0.0178034	5.28046e-12	3.69632e-11	[-1]	Group6	10.7143	21	None Specific Cluster	[CETN2, MZT2B, NDE1, PCM1, PRKACA, PSMA6, PSMB5, PSMB7, PSMD12, PSMD6, PSME3, YWHAE]	[CDK7, CUL1, DCTN2, DYNC1I2, LIN37, NEDD1, PSMA2, PSMC4, PSMD9]	57.1429	42.8571	[CDK7, CETN2, CUL1, DCTN2, DYNC1I2, LIN37, MZT2B, NDE1, NEDD1, PCM1, PRKACA, PSMA2, PSMA6, PSMB5, PSMB7, PSMC4, PSMD12, PSMD6, PSMD9, PSME3, YWHAE]
R-HSA:69278	Cell Cycle, Mitotic	REACTOME_Pathways_20.11.2017	4.82265e-06	0.0025753	5.28046e-12	3.69632e-11	[-1]	Group6	8.20895	44	None Specific Cluster	[CDK6, CDKN2B, CETN2, DYNLL2, GINS1, HDAC1, HIST2H3A, MZT2B, NDE1, NUF2, NUP43, PCM1, POLD3, POLE3, PRKACA, PSMA6, PSMB5, PSMB7, PSMD12, PSMD6, PSME3, SEC13, UBE2D1, YWHAE]	[ANAPC11, CDC26, CDK7, CUL1, DCTN2, DYNC1I2, ESCO1, FZR1, KMT5A, LIN37, NEDD1, NUP58, PSMA2, PSMC4, PSMD9, RAB1B, RAB2A, RPA1, STAG2, WAPL]	54.5455	45.4545	[ANAPC11, CDC26, CDK6, CDK7, CDKN2B, CETN2, CUL1, DCTN2, DYNC1I2, DYNLL2, ESCO1, FZR1, GINS1, HDAC1, HIST2H3A, KMT5A, LIN37, MZT2B, NDE1, NEDD1, NUF2, NUP43, NUP58, PCM1, POLD3, POLE3, PRKACA, PSMA2, PSMA6, PSMB5, PSMB7, PSMC4, PSMD12, PSMD6, PSMD9, PSME3, RAB1B, RAB2A, RPA1, SEC13, STAG2, UBE2D1, WAPL, YWHAE]
R-HSA:69306	DNA Replication	REACTOME_Pathways_20.11.2017	9.18399e-05	0.0443586	5.28046e-12	3.69632e-11	[-1]	Group6	12.963	14	Specific for Cluster #1	[GINS1, POLD3, POLE3, PSMA6, PSMB5, PSMB7, PSMD12, PSMD6, PSME3]	[FZR1, PSMA2, PSMC4, PSMD9, RPA1]	64.2857	35.7143	[FZR1, GINS1, POLD3, POLE3, PSMA2, PSMA6, PSMB5, PSMB7, PSMC4, PSMD12, PSMD6, PSMD9, PSME3, RPA1]
R-HSA:69656	Cyclin A:Cdk2-associated events at S phase entry	REACTOME_Pathways_20.11.2017	1.65681e-05	0.00854915	5.28046e-12	3.69632e-11	[-1]	Group6	16.0494	13	None Specific Cluster	[PSMA6, PSMB5, PSMB7, PSMD12, PSMD6, PSME3]	[CDK7, CUL1, FZR1, LIN37, PSMA2, PSMC4, PSMD9]	46.1538	53.8462	[CDK7, CUL1, FZR1, LIN37, PSMA2, PSMA6, PSMB5, PSMB7, PSMC4, PSMD12, PSMD6, PSMD9, PSME3]
R-HSA:8854050	FBXL7 down-regulates AURKA during mitotic entry and in early mitosis	REACTOME_Pathways_20.11.2017	4.40339e-05	0.022105	5.28046e-12	3.69632e-11	[-1]	Group6	18.5185	10	Specific for Cluster #1	[PSMA6, PSMB5, PSMB7, PSMD12, PSMD6, PSME3]	[CUL1, PSMA2, PSMC4, PSMD9]	60	40	[CUL1, PSMA2, PSMA6, PSMB5, PSMB7, PSMC4, PSMD12, PSMD6, PSMD9, PSME3]
R-HSA:8878166	Transcriptional regulation by RUNX2	REACTOME_Pathways_20.11.2017	8.76265e-05	0.0424988	5.28046e-12	3.69632e-11	[-1]	Group6	12.3967	15	None Specific Cluster	[PSMA6, PSMB5, PSMB7, PSMD12, PSMD6, PSME3, STUB1]	[BAX, CUL1, PSMA2, PSMC4, PSMD9, SMAD1, STAT1, YAP1]	46.6667	53.3333	[BAX, CUL1, PSMA2, PSMA6, PSMB5, PSMB7, PSMC4, PSMD12, PSMD6, PSMD9, PSME3, SMAD1, STAT1, STUB1, YAP1]
R-HSA:8939902	Regulation of RUNX2 expression and activity	REACTOME_Pathways_20.11.2017	2.7208e-05	0.0139033	5.28046e-12	3.69632e-11	[-1]	Group6	16.4384	12	None Specific Cluster	[PSMA6, PSMB5, PSMB7, PSMD12, PSMD6, PSME3, STUB1]	[CUL1, PSMA2, PSMC4, PSMD9, STAT1]	58.3333	41.6667	[CUL1, PSMA2, PSMA6, PSMB5, PSMB7, PSMC4, PSMD12, PSMD6, PSMD9, PSME3, STAT1, STUB1]
R-HSA:8953897	Cellular responses to external stimuli	REACTOME_Pathways_20.11.2017	3.95384e-05	0.020046	5.28046e-12	3.69632e-11	[-1]	Group6	7.87402	40	Specific for Cluster #1	[ATG9A, BAG5, BECN1, CAT, CDK6, CDKN2B, DNAJA4, DNAJB1, DYNLL2, HIST2H3A, LAMTOR2, MOV10, NUP43, PSMA6, PSMB5, PSMB7, PSMD12, PSMD6, PSME3, RING1, RRAGC, ST13, STIP1, UBE2D1, ULK1, YWHAE]	[ANAPC11, ATG12, CDC26, DCTN2, DYNC1I2, FZR1, HSBP1, HSF1, MT1F, NUP58, PSMA2, PSMC4, PSMD9, RPA1]	65	35	[ANAPC11, ATG12, ATG9A, BAG5, BECN1, CAT, CDC26, CDK6, CDKN2B, DCTN2, DNAJA4, DNAJB1, DYNC1I2, DYNLL2, FZR1, HIST2H3A, HSBP1, HSF1, LAMTOR2, MOV10, MT1F, NUP43, NUP58, PSMA2, PSMA6, PSMB5, PSMB7, PSMC4, PSMD12, PSMD6, PSMD9, PSME3, RING1, RPA1, RRAGC, ST13, STIP1, UBE2D1, ULK1, YWHAE]
R-HSA:983168	Antigen processing: Ubiquitination & Proteasome degradation	REACTOME_Pathways_20.11.2017	9.62073e-06	0.00503164	5.28046e-12	3.69632e-11	[-1]	Group6	9.67742	30	None Specific Cluster	[CUL3, KEAP1, KLHL13, PSMA6, PSMB5, PSMB7, PSMD12, PSMD6, PSME3, SIAH1, STUB1, TRIM39, UBE2D1, UBE2W]	[ANAPC11, ASB5, CDC26, CDC34, CUL1, FBXL4, FBXL8, FZR1, PSMA2, PSMC4, PSMD9, RBCK1, RNF130, UBAC1, UBE2A, UBE2G1]	46.6667	53.3333	[ANAPC11, ASB5, CDC26, CDC34, CUL1, CUL3, FBXL4, FBXL8, FZR1, KEAP1, KLHL13, PSMA2, PSMA6, PSMB5, PSMB7, PSMC4, PSMD12, PSMD6, PSMD9, PSME3, RBCK1, RNF130, SIAH1, STUB1, TRIM39, UBAC1, UBE2A, UBE2D1, UBE2G1, UBE2W]
R-HSA:983169	Class I MHC mediated antigen processing & presentation	REACTOME_Pathways_20.11.2017	2.94206e-07	0.000163872	5.28046e-12	3.69632e-11	[-1]	Group6	9.91957	37	None Specific Cluster	[CANX, CUL3, IKBKB, KEAP1, KLHL13, PSMA6, PSMB5, PSMB7, PSMD12, PSMD6, PSME3, SEC13, SIAH1, STUB1, TRIM39, UBE2D1, UBE2W]	[ANAPC11, ASB5, CDC26, CDC34, CUL1, ERAP2, FBXL4, FBXL8, FZR1, PDIA3, PSMA2, PSMC4, PSMD9, RBCK1, RNF130, SAR1B, SEC31A, UBAC1, UBE2A, UBE2G1]	45.9459	54.0541	[ANAPC11, ASB5, CANX, CDC26, CDC34, CUL1, CUL3, ERAP2, FBXL4, FBXL8, FZR1, IKBKB, KEAP1, KLHL13, PDIA3, PSMA2, PSMA6, PSMB5, PSMB7, PSMC4, PSMD12, PSMD6, PSMD9, PSME3, RBCK1, RNF130, SAR1B, SEC13, SEC31A, SIAH1, STUB1, TRIM39, UBAC1, UBE2A, UBE2D1, UBE2G1, UBE2W]
GO:0002474	antigen processing and presentation of peptide antigen via MHC class I	GO_BiologicalProcess-EBI-QuickGO-GOA_20.11.2017_00h00	1.63499e-06	0.000889436	5.28046e-12	3.69632e-11	[4]	Group6	16.1616	16	None Specific Cluster	[CANX, IKBKB, PSMA6, PSMB5, PSMB7, PSMD12, PSMD6, PSME3, SEC13]	[ERAP2, PDIA3, PSMA2, PSMC4, PSMD9, SAR1B, SEC31A]	56.25	43.75	[CANX, ERAP2, IKBKB, PDIA3, PSMA2, PSMA6, PSMB5, PSMB7, PSMC4, PSMD12, PSMD6, PSMD9, PSME3, SAR1B, SEC13, SEC31A]
GO:0001736	establishment of planar polarity	GO_BiologicalProcess-EBI-QuickGO-GOA_20.11.2017_00h00	5.62446e-05	0.0278973	5.28046e-12	3.69632e-11	[4, 5, 6, 7]	Group6	12.3077	16	None Specific Cluster	[CDC42, PSMA6, PSMB5, PSMB7, PSMD12, PSMD6, PSME3, RORA]	[CTHRC1, DAAM1, IFT20, PSMA2, PSMC4, PSMD9, RYK, SFRP2]	50	50	[CDC42, CTHRC1, DAAM1, IFT20, PSMA2, PSMA6, PSMB5, PSMB7, PSMC4, PSMD12, PSMD6, PSMD9, PSME3, RORA, RYK, SFRP2]
GO:0002244	hematopoietic progenitor cell differentiation	GO_BiologicalProcess-EBI-QuickGO-GOA_20.11.2017_00h00	4.56487e-05	0.0228244	5.28046e-12	3.69632e-11	[4, 5, 6, 7, 8]	Group6	11.1765	19	Specific for Cluster #1	[CDK6, CHD2, EEF2, GATA2, HIST2H3A, MEOX1, PSMA6, PSMB5, PSMB7, PSMD12, PSMD6, PSME3, RBM47]	[BCL2, PSMA2, PSMC4, PSMD9, TAL1, YAP1]	68.4211	31.5789	[BCL2, CDK6, CHD2, EEF2, GATA2, HIST2H3A, MEOX1, PSMA2, PSMA6, PSMB5, PSMB7, PSMC4, PSMD12, PSMD6, PSMD9, PSME3, RBM47, TAL1, YAP1]
GO:1903362	regulation of cellular protein catabolic process	GO_BiologicalProcess-EBI-QuickGO-GOA_20.11.2017_00h00	6.67926e-05	0.0327951	5.28046e-12	3.69632e-11	[5, 6, 7]	Group6	9.0301	27	None Specific Cluster	[BAG5, CLEC16A, KEAP1, N4BP1, PRKACA, PSMA6, PSMB5, PSMB7, PSMD12, PSMD6, PSME3, RAD23A, STUB1, TRIM39, UBE2D1, USP19]	[ANAPC11, ANKIB1, CDC26, CUL1, FZR1, PSMA2, PSMC4, PSMD9, RNF139, SENP1, WDR91]	59.2593	40.7407	[ANAPC11, ANKIB1, BAG5, CDC26, CLEC16A, CUL1, FZR1, KEAP1, N4BP1, PRKACA, PSMA2, PSMA6, PSMB5, PSMB7, PSMC4, PSMD12, PSMD6, PSMD9, PSME3, RAD23A, RNF139, SENP1, STUB1, TRIM39, UBE2D1, USP19, WDR91]
GO:0010498	proteasomal protein catabolic process	GO_BiologicalProcess-EBI-QuickGO-GOA_20.11.2017_00h00	3.89123e-08	2.18687e-05	5.28046e-12	3.69632e-11	[5, 6, 7, 8]	Group6	9.8434	44	None Specific Cluster	[ATE1, BAG5, BTBD2, CLEC16A, CRBN, CUL3, GID4, KEAP1, N4BP1, PRKACA, PSMA6, PSMB5, PSMB7, PSMD12, PSMD6, PSME3, RAD23A, SIAH1, SPOP, STUB1, UBE2D1, UBE2I, UBE2W, USP19]	[ANAPC11, ANKIB1, CDC26, CDC34, CUL1, FZR1, KCTD5, NR1D1, PSMA2, PSMC4, PSMD9, RBCK1, RNF121, RNF139, SENP1, TMEM129, TRIM25, UBE2A, UBE4B, UBXN8]	54.5455	45.4545	[ANAPC11, ANKIB1, ATE1, BAG5, BTBD2, CDC26, CDC34, CLEC16A, CRBN, CUL1, CUL3, FZR1, GID4, KCTD5, KEAP1, N4BP1, NR1D1, PRKACA, PSMA2, PSMA6, PSMB5, PSMB7, PSMC4, PSMD12, PSMD6, PSMD9, PSME3, RAD23A, RBCK1, RNF121, RNF139, SENP1, SIAH1, SPOP, STUB1, TMEM129, TRIM25, UBE2A, UBE2D1, UBE2I, UBE2W, UBE4B, UBXN8, USP19]
GO:0070646	protein modification by small protein removal	GO_BiologicalProcess-EBI-QuickGO-GOA_20.11.2017_00h00	1.6194e-05	0.00837231	5.28046e-12	3.69632e-11	[5, 6, 7, 8]	Group6	9.28793	30	Specific for Cluster #1	[ACTR8, BECN1, COPS2, ENY2, HCFC1, KEAP1, NFRKB, PSMA6, PSMB5, PSMB7, PSMD12, PSMD6, PSME3, RAD23A, SMAD2, SUDS3, TFPT, UBE2D1, USP19]	[BABAM1, JOSD1, MBD6, PSMA2, PSMC4, PSMD9, SENP1, SMAD1, TADA3, TRIM25, USP7]	63.3333	36.6667	[ACTR8, BABAM1, BECN1, COPS2, ENY2, HCFC1, JOSD1, KEAP1, MBD6, NFRKB, PSMA2, PSMA6, PSMB5, PSMB7, PSMC4, PSMD12, PSMD6, PSMD9, PSME3, RAD23A, SENP1, SMAD1, SMAD2, SUDS3, TADA3, TFPT, TRIM25, UBE2D1, USP19, USP7]
GO:0070647	protein modification by small protein conjugation or removal	GO_BiologicalProcess-EBI-QuickGO-GOA_20.11.2017_00h00	3.60754e-08	2.03104e-05	5.28046e-12	3.69632e-11	[6, 7]	Group6	7.30868	85	None Specific Cluster	[ACTR8, BAG5, BECN1, BTBD2, CDC42, COPS2, CRBN, CUL3, DCAF7, E4F1, ENY2, GID4, HCFC1, KEAP1, KLHL13, MED10, MED18, MED21, N4BP1, NDFIP1, NFRKB, NUP43, PAX6, PSMA6, PSMB5, PSMB7, PSMD12, PSMD6, PSME3, RAD23A, RING1, RNF168, RNF212, SIAH1, SMAD2, SOCS7, SPOP, STUB1, SUDS3, TFPT, TMEM189, TRIM39, UBE2D1, UBE2I, UBE2W, USP19, UVSSA]	[AKTIP, ANAPC11, ANKIB1, ASB5, BABAM1, BCL2, CDC26, CDC34, CISH, CUL1, DCAF6, FBXL4, FBXL8, FZR1, JOSD1, MARCH2, MBD6, MUL1, NSMCE1, NUP58, PSMA2, PSMC4, PSMD9, RBCK1, RNF121, RNF130, RNF139, SENP1, SMAD1, TADA3, TMEM129, TRIM25, TRIM44, UBAC1, UBE2A, UBE2G1, UBE4B, USP7]	55.2941	44.7059	[ACTR8, AKTIP, ANAPC11, ANKIB1, ASB5, BABAM1, BAG5, BCL2, BECN1, BTBD2, CDC26, CDC34, CDC42, CISH, COPS2, CRBN, CUL1, CUL3, DCAF6, DCAF7, E4F1, ENY2, FBXL4, FBXL8, FZR1, GID4, HCFC1, JOSD1, KEAP1, KLHL13, MARCH2, MBD6, MED10, MED18, MED21, MUL1, N4BP1, NDFIP1, NFRKB, NSMCE1, NUP43, NUP58, PAX6, PSMA2, PSMA6, PSMB5, PSMB7, PSMC4, PSMD12, PSMD6, PSMD9, PSME3, RAD23A, RBCK1, RING1, RNF121, RNF130, R…
GO:0060218	hematopoietic stem cell differentiation	GO_BiologicalProcess-EBI-QuickGO-GOA_20.11.2017_00h00	6.87018e-07	0.00037786	5.28046e-12	3.69632e-11	[5, 6, 7, 8, 9]	Group6	17.2043	16	Specific for Cluster #1	[CDK6, CHD2, GATA2, HIST2H3A, MEOX1, PSMA6, PSMB5, PSMB7, PSMD12, PSMD6, PSME3]	[PSMA2, PSMC4, PSMD9, TAL1, YAP1]	68.75	31.25	[CDK6, CHD2, GATA2, HIST2H3A, MEOX1, PSMA2, PSMA6, PSMB5, PSMB7, PSMC4, PSMD12, PSMD6, PSMD9, PSME3, TAL1, YAP1]
GO:0016579	protein deubiquitination	GO_BiologicalProcess-EBI-QuickGO-GOA_20.11.2017_00h00	3.96607e-05	0.0200286	5.28046e-12	3.69632e-11	[6, 7, 8, 9]	Group6	9.15033	28	Specific for Cluster #1	[ACTR8, BECN1, ENY2, HCFC1, KEAP1, NFRKB, PSMA6, PSMB5, PSMB7, PSMD12, PSMD6, PSME3, RAD23A, SMAD2, SUDS3, TFPT, UBE2D1, USP19]	[BABAM1, JOSD1, MBD6, PSMA2, PSMC4, PSMD9, SMAD1, TADA3, TRIM25, USP7]	64.2857	35.7143	[ACTR8, BABAM1, BECN1, ENY2, HCFC1, JOSD1, KEAP1, MBD6, NFRKB, PSMA2, PSMA6, PSMB5, PSMB7, PSMC4, PSMD12, PSMD6, PSMD9, PSME3, RAD23A, SMAD1, SMAD2, SUDS3, TADA3, TFPT, TRIM25, UBE2D1, USP19, USP7]
GO:0060071	Wnt signaling pathway, planar cell polarity pathway	GO_BiologicalProcess-EBI-QuickGO-GOA_20.11.2017_00h00	5.93033e-05	0.0292365	5.28046e-12	3.69632e-11	[6, 7, 8, 9]	Group6	12.8205	15	None Specific Cluster	[CDC42, PSMA6, PSMB5, PSMB7, PSMD12, PSMD6, PSME3, RORA]	[CTHRC1, DAAM1, PSMA2, PSMC4, PSMD9, RYK, SFRP2]	53.3333	46.6667	[CDC42, CTHRC1, DAAM1, PSMA2, PSMA6, PSMB5, PSMB7, PSMC4, PSMD12, PSMD6, PSMD9, PSME3, RORA, RYK, SFRP2]
GO:0006511	ubiquitin-dependent protein catabolic process	GO_BiologicalProcess-EBI-QuickGO-GOA_20.11.2017_00h00	3.17403e-06	0.00171397	5.28046e-12	3.69632e-11	[7, 8, 9]	Group6	8.0402	48	None Specific Cluster	[ATE1, BAG5, BTBD2, CLEC16A, CRBN, CUL3, GID4, KEAP1, N4BP1, PSMA6, PSMB5, PSMB7, PSMD12, PSMD6, PSME3, RAD23A, RNF168, SIAH1, SPOP, STUB1, TRIM39, UBE2D1, UBE2I, UBE2W, USP19]	[ANAPC11, ANKIB1, CDC26, CDC34, CUL1, FBXL4, FZR1, KCTD5, PSMA2, PSMC4, PSMD9, RBCK1, RNF121, RNF139, SENP1, TMEM129, TRIM25, UBE2A, UBE2G1, UBE4B, UBXN8, USP7, VPS4A]	52.0833	47.9167	[ANAPC11, ANKIB1, ATE1, BAG5, BTBD2, CDC26, CDC34, CLEC16A, CRBN, CUL1, CUL3, FBXL4, FZR1, GID4, KCTD5, KEAP1, N4BP1, PSMA2, PSMA6, PSMB5, PSMB7, PSMC4, PSMD12, PSMD6, PSMD9, PSME3, RAD23A, RBCK1, RNF121, RNF139, RNF168, SENP1, SIAH1, SPOP, STUB1, TMEM129, TRIM25, TRIM39, UBE2A, UBE2D1, UBE2G1, UBE2I, UBE2W, UBE4B, UBXN8, USP19, USP7, VPS4A]
GO:0043161	proteasome-mediated ubiquitin-dependent protein catabolic process	GO_BiologicalProcess-EBI-QuickGO-GOA_20.11.2017_00h00	1.87995e-08	1.06029e-05	5.28046e-12	3.69632e-11	[6, 7, 8, 9, 10]	Group6	10.3797	41	None Specific Cluster	[BAG5, BTBD2, CLEC16A, CRBN, CUL3, GID4, KEAP1, N4BP1, PSMA6, PSMB5, PSMB7, PSMD12, PSMD6, PSME3, RAD23A, SIAH1, SPOP, STUB1, UBE2D1, UBE2I, UBE2W, USP19]	[ANAPC11, ANKIB1, CDC26, CDC34, CUL1, FZR1, KCTD5, PSMA2, PSMC4, PSMD9, RBCK1, RNF121, RNF139, SENP1, TMEM129, TRIM25, UBE2A, UBE4B, UBXN8]	53.6585	46.3415	[ANAPC11, ANKIB1, BAG5, BTBD2, CDC26, CDC34, CLEC16A, CRBN, CUL1, CUL3, FZR1, GID4, KCTD5, KEAP1, N4BP1, PSMA2, PSMA6, PSMB5, PSMB7, PSMC4, PSMD12, PSMD6, PSMD9, PSME3, RAD23A, RBCK1, RNF121, RNF139, SENP1, SIAH1, SPOP, STUB1, TMEM129, TRIM25, UBE2A, UBE2D1, UBE2I, UBE2W, UBE4B, UBXN8, USP19]
GO:0002223	stimulatory C-type lectin receptor signaling pathway	GO_BiologicalProcess-EBI-QuickGO-GOA_20.11.2017_00h00	5.11642e-05	0.0254798	5.28046e-12	3.69632e-11	[6, 7, 8, 9, 10, 11]	Group6	12.4031	16	Specific for Cluster #1	[IKBKB, PKN1, PRKACA, PSMA6, PSMB5, PSMB7, PSMD12, PSMD6, PSME3, UBE2D1]	[CUL1, PAK1, PKN2, PSMA2, PSMC4, PSMD9]	62.5	37.5	[CUL1, IKBKB, PAK1, PKN1, PKN2, PRKACA, PSMA2, PSMA6, PSMB5, PSMB7, PSMC4, PSMD12, PSMD6, PSMD9, PSME3, UBE2D1]
GO:0051438	regulation of ubiquitin-protein transferase activity	GO_BiologicalProcess-EBI-QuickGO-GOA_20.11.2017_00h00	6.17636e-05	0.0303877	5.28046e-12	3.69632e-11	[5, 8, 9, 10, 11]	Group6	12.2137	16	None Specific Cluster	[BAG5, PSMA6, PSMB5, PSMB7, PSMD12, PSMD6, PSME3, STUB1, UBE2D1]	[ANAPC11, CDC26, CUL1, FZR1, PSMA2, PSMC4, PSMD9]	56.25	43.75	[ANAPC11, BAG5, CDC26, CUL1, FZR1, PSMA2, PSMA6, PSMB5, PSMB7, PSMC4, PSMD12, PSMD6, PSMD9, PSME3, STUB1, UBE2D1]
GO:0031145	anaphase-promoting complex-dependent catabolic process	GO_BiologicalProcess-EBI-QuickGO-GOA_20.11.2017_00h00	3.73182e-06	0.00200772	5.28046e-12	3.69632e-11	[7, 8, 9, 10, 11]	Group6	17.0732	14	None Specific Cluster	[CUL3, PSMA6, PSMB5, PSMB7, PSMD12, PSMD6, PSME3, UBE2D1]	[ANAPC11, CDC26, FZR1, PSMA2, PSMC4, PSMD9]	57.1429	42.8571	[ANAPC11, CDC26, CUL3, FZR1, PSMA2, PSMA6, PSMB5, PSMB7, PSMC4, PSMD12, PSMD6, PSMD9, PSME3, UBE2D1]
GO:0031397	negative regulation of protein ubiquitination	GO_BiologicalProcess-EBI-QuickGO-GOA_20.11.2017_00h00	6.77039e-05	0.0331749	5.28046e-12	3.69632e-11	[7, 8, 9, 10, 11]	Group6	11.6438	17	None Specific Cluster	[BAG5, N4BP1, PSMA6, PSMB5, PSMB7, PSMD12, PSMD6, PSME3, TRIM39, UBE2D1]	[ANAPC11, CDC26, FZR1, PSMA2, PSMC4, PSMD9, TRIM44]	58.8235	41.1765	[ANAPC11, BAG5, CDC26, FZR1, N4BP1, PSMA2, PSMA6, PSMB5, PSMB7, PSMC4, PSMD12, PSMD6, PSMD9, PSME3, TRIM39, TRIM44, UBE2D1]
GO:0042787	protein ubiquitination involved in ubiquitin-dependent protein catabolic process	GO_BiologicalProcess-EBI-QuickGO-GOA_20.11.2017_00h00	6.7021e-06	0.00355211	5.28046e-12	3.69632e-11	[8, 9, 10]	Group6	10.9589	24	None Specific Cluster	[BTBD2, CUL3, PSMA6, PSMB5, PSMB7, PSMD12, PSMD6, PSME3, SIAH1, SPOP, STUB1, TRIM39, UBE2D1]	[ANAPC11, ANKIB1, CDC26, CUL1, FZR1, PSMA2, PSMC4, PSMD9, RNF139, TRIM25, UBE4B]	54.1667	45.8333	[ANAPC11, ANKIB1, BTBD2, CDC26, CUL1, CUL3, FZR1, PSMA2, PSMA6, PSMB5, PSMB7, PSMC4, PSMD12, PSMD6, PSMD9, PSME3, RNF139, SIAH1, SPOP, STUB1, TRIM25, TRIM39, UBE2D1, UBE4B]
GO:2000058	regulation of protein ubiquitination involved in ubiquitin-dependent protein catabolic process	GO_BiologicalProcess-EBI-QuickGO-GOA_20.11.2017_00h00	7.58502e-06	0.00399731	5.28046e-12	3.69632e-11	[7, 8, 9, 10, 11]	Group6	14.4144	16	None Specific Cluster	[PSMA6, PSMB5, PSMB7, PSMD12, PSMD6, PSME3, TRIM39, UBE2D1]	[ANAPC11, CDC26, CUL1, FZR1, PSMA2, PSMC4, PSMD9, RNF139]	50	50	[ANAPC11, CDC26, CUL1, FZR1, PSMA2, PSMA6, PSMB5, PSMB7, PSMC4, PSMD12, PSMD6, PSMD9, PSME3, RNF139, TRIM39, UBE2D1]
GO:0051444	negative regulation of ubiquitin-protein transferase activity	GO_BiologicalProcess-EBI-QuickGO-GOA_20.11.2017_00h00	1.00299e-05	0.00523559	5.28046e-12	3.69632e-11	[6, 8, 9, 10, 11, 12]	Group6	15.7303	14	None Specific Cluster	[BAG5, PSMA6, PSMB5, PSMB7, PSMD12, PSMD6, PSME3, UBE2D1]	[ANAPC11, CDC26, FZR1, PSMA2, PSMC4, PSMD9]	57.1429	42.8571	[ANAPC11, BAG5, CDC26, FZR1, PSMA2, PSMA6, PSMB5, PSMB7, PSMC4, PSMD12, PSMD6, PSMD9, PSME3, UBE2D1]
GO:0051436	negative regulation of ubiquitin-protein ligase activity involved in mitotic cell cycle	GO_BiologicalProcess-EBI-QuickGO-GOA_20.11.2017_00h00	5.09471e-06	0.00271548	5.28046e-12	3.69632e-11	[5, 6, 8, 10, 11, 12, 13, 14]	Group6	17.8082	13	None Specific Cluster	[PSMA6, PSMB5, PSMB7, PSMD12, PSMD6, PSME3, UBE2D1]	[ANAPC11, CDC26, FZR1, PSMA2, PSMC4, PSMD9]	53.8462	46.1538	[ANAPC11, CDC26, FZR1, PSMA2, PSMA6, PSMB5, PSMB7, PSMC4, PSMD12, PSMD6, PSMD9, PSME3, UBE2D1]
GO:0002474	antigen processing and presentation of peptide antigen via MHC class I	GO_ImmuneSystemProcess-EBI-QuickGO-GOA_20.11.2017_00h00	6.51514e-06	0.000156363	1.90895e-05	1.90895e-05	[3]	Group0	16.1616	16	None Specific Cluster	[CANX, IKBKB, PSMA6, PSMB5, PSMB7, PSMD12, PSMD6, PSME3, SEC13]	[ERAP2, PDIA3, PSMA2, PSMC4, PSMD9, SAR1B, SEC31A]	56.25	43.75	[CANX, ERAP2, IKBKB, PDIA3, PSMA2, PSMA6, PSMB5, PSMB7, PSMC4, PSMD12, PSMD6, PSMD9, PSME3, SAR1B, SEC13, SEC31A]
GO:0002478	antigen processing and presentation of exogenous peptide antigen	GO_ImmuneSystemProcess-EBI-QuickGO-GOA_20.11.2017_00h00	0.000669905	0.0133981	1.90895e-05	1.90895e-05	[3]	Group0	10.3261	19	None Specific Cluster	[AP1G1, CANX, DYNLL2, IKBKB, PSMA6, PSMB5, PSMB7, PSMD12, PSMD6, PSME3, SEC13]	[DCTN2, DYNC1I2, PDIA3, PSMA2, PSMC4, PSMD9, SAR1B, SEC31A]	57.8947	42.1053	[AP1G1, CANX, DCTN2, DYNC1I2, DYNLL2, IKBKB, PDIA3, PSMA2, PSMA6, PSMB5, PSMB7, PSMC4, PSMD12, PSMD6, PSMD9, PSME3, SAR1B, SEC13, SEC31A]
GO:0002244	hematopoietic progenitor cell differentiation	GO_ImmuneSystemProcess-EBI-QuickGO-GOA_20.11.2017_00h00	0.000187933	0.0039466	1.90895e-05	1.90895e-05	[4]	Group0	11.1765	19	Specific for Cluster #1	[CDK6, CHD2, EEF2, GATA2, HIST2H3A, MEOX1, PSMA6, PSMB5, PSMB7, PSMD12, PSMD6, PSME3, RBM47]	[BCL2, PSMA2, PSMC4, PSMD9, TAL1, YAP1]	68.4211	31.5789	[BCL2, CDK6, CHD2, EEF2, GATA2, HIST2H3A, MEOX1, PSMA2, PSMA6, PSMB5, PSMB7, PSMC4, PSMD12, PSMD6, PSMD9, PSME3, RBM47, TAL1, YAP1]
GO:0002479	antigen processing and presentation of exogenous peptide antigen via MHC class I, TAP-dependent	GO_ImmuneSystemProcess-EBI-QuickGO-GOA_20.11.2017_00h00	0.000834791	0.015861	1.90895e-05	1.90895e-05	[5]	Group0	13.75	11	Specific for Cluster #1	[IKBKB, PSMA6, PSMB5, PSMB7, PSMD12, PSMD6, PSME3]	[PDIA3, PSMA2, PSMC4, PSMD9]	63.6364	36.3636	[IKBKB, PDIA3, PSMA2, PSMA6, PSMB5, PSMB7, PSMC4, PSMD12, PSMD6, PSMD9, PSME3]
GO:0060218	hematopoietic stem cell differentiation	GO_ImmuneSystemProcess-EBI-QuickGO-GOA_20.11.2017_00h00	2.78003e-06	6.95009e-05	1.90895e-05	1.90895e-05	[5]	Group0	17.2043	16	Specific for Cluster #1	[CDK6, CHD2, GATA2, HIST2H3A, MEOX1, PSMA6, PSMB5, PSMB7, PSMD12, PSMD6, PSME3]	[PSMA2, PSMC4, PSMD9, TAL1, YAP1]	68.75	31.25	[CDK6, CHD2, GATA2, HIST2H3A, MEOX1, PSMA2, PSMA6, PSMB5, PSMB7, PSMC4, PSMD12, PSMD6, PSMD9, PSME3, TAL1, YAP1]
GO:1902036	regulation of hematopoietic stem cell differentiation	GO_ImmuneSystemProcess-EBI-QuickGO-GOA_20.11.2017_00h00	1.33678e-05	0.000307458	1.90895e-05	1.90895e-05	[4, 6]	Group0	17.0732	14	Specific for Cluster #1	[CDK6, GATA2, HIST2H3A, PSMA6, PSMB5, PSMB7, PSMD12, PSMD6, PSME3]	[PSMA2, PSMC4, PSMD9, TAL1, YAP1]	64.2857	35.7143	[CDK6, GATA2, HIST2H3A, PSMA2, PSMA6, PSMB5, PSMB7, PSMC4, PSMD12, PSMD6, PSMD9, PSME3, TAL1, YAP1]
GO:0002223	stimulatory C-type lectin receptor signaling pathway	GO_ImmuneSystemProcess-EBI-QuickGO-GOA_20.11.2017_00h00	0.000187894	0.00413367	1.90895e-05	1.90895e-05	[5, 7, 8]	Group0	12.4031	16	Specific for Cluster #1	[IKBKB, PKN1, PRKACA, PSMA6, PSMB5, PSMB7, PSMD12, PSMD6, PSME3, UBE2D1]	[CUL1, PAK1, PKN2, PSMA2, PSMC4, PSMD9]	62.5	37.5	[CUL1, IKBKB, PAK1, PKN1, PKN2, PRKACA, PSMA2, PSMA6, PSMB5, PSMB7, PSMC4, PSMD12, PSMD6, PSMD9, PSME3, UBE2D1]

## Sheet: Cytoscape processes RNAseq 72h
GOID	GOTerm	Ontology Source	Term PValue	Term PValue Corrected with Bonferroni step down	Group PValue	Group PValue Corrected with Bonferroni step down	GOLevels	GOGroups	% Associated Genes	Nr. Genes	Cluster	Genes Cluster #1	Genes Cluster #2	%Genes Cluster #1	%Genes Cluster #2	Associated Genes Found
GO:0006865	amino acid transport	GO_BiologicalProcess-EBI-QuickGO-GOA_20.11.2017_00h00	6.18347e-05	0.0312884	6.18347e-05	0.000123669	[5, 7, 8]	Group0	10.4167	15	Specific for Cluster #2	[NLRP3, SLC25A38]	[AVPR1A, GRM7, HRH3, OSR1, SERINC4, SLC17A5, SLC1A2, SLC1A4, SLC6A17, SLC7A5, SLC7A9, STK39, TSPOAP1]	13.3333	86.6667	[AVPR1A, GRM7, HRH3, NLRP3, OSR1, SERINC4, SLC17A5, SLC1A2, SLC1A4, SLC25A38, SLC6A17, SLC7A5, SLC7A9, STK39, TSPOAP1]
R-HSA:8856825	Cargo recognition for clathrin-mediated endocytosis	REACTOME_Pathways_20.11.2017	1.6517e-05	0.00858885	1.6517e-05	6.60681e-05	[-1]	Group1	13.1313	13	Specific for Cluster #2	[AP2S1, CLTB, SLC2A8]	[AAK1, CHRM2, EPN1, FCHO2, HGS, KIAA0319, REPS2, STAM, TACR1, VAMP4]	23.0769	76.9231	[AAK1, AP2S1, CHRM2, CLTB, EPN1, FCHO2, HGS, KIAA0319, REPS2, SLC2A8, STAM, TACR1, VAMP4]
GO:0050804	modulation of chemical synaptic transmission	GO_BiologicalProcess-EBI-QuickGO-GOA_20.11.2017_00h00	9.60805e-05	0.0483285	8.15567e-05	8.15567e-05	[3, 4, 5, 7, 8]	Group2	7.50751	25	Specific for Cluster #2	[CPEB3, GRIN1, LGI1, PPP1R9B, ZMYND8]	[ABHD6, BAIAP2, C1QTNF1, CNTN2, CREB1, DMPK, GRID2IP, GRIK1, GRIK3, GRM1, GRM7, KCNB1, NAPA, NLGN2, PPP1R9A, PPP3CA, PRKCZ, RAPGEF2, RIMS2, TACR1]	20	80	[ABHD6, BAIAP2, C1QTNF1, CNTN2, CPEB3, CREB1, DMPK, GRID2IP, GRIK1, GRIK3, GRIN1, GRM1, GRM7, KCNB1, LGI1, NAPA, NLGN2, PPP1R9A, PPP1R9B, PPP3CA, PRKCZ, RAPGEF2, RIMS2, TACR1, ZMYND8]
GO:0007268	chemical synaptic transmission	GO_BiologicalProcess-EBI-QuickGO-GOA_20.11.2017_00h00	8.15567e-05	0.0411046	8.15567e-05	8.15567e-05	[6, 7]	Group2	6.22084	40	Specific for Cluster #2	[CACNB4, CPEB3, GRIN1, LGI1, PPP1R9B, ZMYND8]	[ABHD6, ASIC2, BAIAP2, C1QTNF1, CHRM2, CNTN2, CREB1, DMPK, DOC2B, GJC1, GRID2IP, GRIK1, GRIK3, GRM1, GRM7, HRH3, KCNB1, KCNMB3, KCNN1, MYO5A, NAPA, NLGN2, PDYN, PPP1R9A, PPP3CA, PRKCZ, RAPGEF2, RIMS2, SLC1A2, SLC1A4, SYT6, TACR1, TSPOAP1, VIPR1]	15	85	[ABHD6, ASIC2, BAIAP2, C1QTNF1, CACNB4, CHRM2, CNTN2, CPEB3, CREB1, DMPK, DOC2B, GJC1, GRID2IP, GRIK1, GRIK3, GRIN1, GRM1, GRM7, HRH3, KCNB1, KCNMB3, KCNN1, LGI1, MYO5A, NAPA, NLGN2, PDYN, PPP1R9A, PPP1R9B, PPP3CA, PRKCZ, RAPGEF2, RIMS2, SLC1A2, SLC1A4, SYT6, TACR1, TSPOAP1, VIPR1, ZMYND8]
GO:0044057	regulation of system process	GO_BiologicalProcess-EBI-QuickGO-GOA_20.11.2017_00h00	1.3678e-05	0.00713993	5.2866e-07	2.6433e-06	[3, 4]	Group3	6.94184	37	Specific for Cluster #2	[CACNB4, HCAR2, KCNH2, KCNIP4, NLRP3, PDE4D, TNNT1]	[ASIC2, ATP1B2, ATP1B3, AVPR1A, C1QTNF1, CACNA1C, CACNA2D4, CHRM2, DMD, DMPK, EHD3, FGFR1, GJC1, GRM1, HDAC4, HRC, KCNIP1, KCNMB3, KCNQ1, NLGN2, NOV, NRG1, PKN1, PPP3CA, PRKG1, SPTBN4, STK39, TACR1, THRA, ZC3H12A]	18.9189	81.0811	[ASIC2, ATP1B2, ATP1B3, AVPR1A, C1QTNF1, CACNA1C, CACNA2D4, CACNB4, CHRM2, DMD, DMPK, EHD3, FGFR1, GJC1, GRM1, HCAR2, HDAC4, HRC, KCNH2, KCNIP1, KCNIP4, KCNMB3, KCNQ1, NLGN2, NLRP3, NOV, NRG1, PDE4D, PKN1, PPP3CA, PRKG1, SPTBN4, STK39, TACR1, THRA, TNNT1, ZC3H12A]
GO:0043269	regulation of ion transport	GO_BiologicalProcess-EBI-QuickGO-GOA_20.11.2017_00h00	1.17898e-05	0.00616609	5.2866e-07	2.6433e-06	[4, 5]	Group3	6.43275	44	Specific for Cluster #2	[ANO1, CACNB4, FHL1, GRIN1, KCNH2, KCNIP4, NLRP3, PDE4D, VDAC2]	[ASIC2, ATP1B2, ATP1B3, ATP8A2, AVPR1A, B2M, CACNA1C, CACNA2D4, CNGA3, CRACR2A, DMD, DMPK, EHD3, GJC2, GRM7, HCN2, HRC, HRH3, KCNAB2, KCNB1, KCNC1, KCNIP1, KCNQ1, KCNT1, MYO5A, NETO2, NLGN2, OSR1, REST, SIK1, SPTBN4, STK39, TPCN1, TRPM5, TTYH1]	20.4545	79.5455	[ANO1, ASIC2, ATP1B2, ATP1B3, ATP8A2, AVPR1A, B2M, CACNA1C, CACNA2D4, CACNB4, CNGA3, CRACR2A, DMD, DMPK, EHD3, FHL1, GJC2, GRIN1, GRM7, HCN2, HRC, HRH3, KCNAB2, KCNB1, KCNC1, KCNH2, KCNIP1, KCNIP4, KCNQ1, KCNT1, MYO5A, NETO2, NLGN2, NLRP3, OSR1, PDE4D, REST, SIK1, SPTBN4, STK39, TPCN1, TRPM5, TTYH1, VDAC2]
GO:1903522	regulation of blood circulation	GO_BiologicalProcess-EBI-QuickGO-GOA_20.11.2017_00h00	9.89868e-06	0.00518691	5.2866e-07	2.6433e-06	[4, 5]	Group3	8.5034	25	Specific for Cluster #2	[CACNB4, KCNH2, KCNIP4, NLRP3, PDE4D]	[ASIC2, ATP1B2, ATP1B3, AVPR1A, CACNA1C, CACNA2D4, CHRM2, DMD, DMPK, EHD3, GJC1, HDAC4, HRC, KCNIP1, KCNMB3, KCNQ1, SPTBN4, TACR1, THRA, ZC3H12A]	20	80	[ASIC2, ATP1B2, ATP1B3, AVPR1A, CACNA1C, CACNA2D4, CACNB4, CHRM2, DMD, DMPK, EHD3, GJC1, HDAC4, HRC, KCNH2, KCNIP1, KCNIP4, KCNMB3, KCNQ1, NLRP3, PDE4D, SPTBN4, TACR1, THRA, ZC3H12A]
GO:0060047	heart contraction	GO_BiologicalProcess-EBI-QuickGO-GOA_20.11.2017_00h00	2.73576e-05	0.0140344	5.2866e-07	2.6433e-06	[5]	Group3	8.39416	23	Specific for Cluster #2	[CACNB4, KCNH2, KCNIP4, PDE4D]	[ATP1B2, ATP1B3, AVPR1A, CACNA1C, CACNA2D4, CHRM2, DMD, DMPK, EHD3, GJC1, HDAC4, HRC, KCNIP1, KCNQ1, SGCD, SPTBN4, THRA, TTN, ZC3H12A]	17.3913	82.6087	[ATP1B2, ATP1B3, AVPR1A, CACNA1C, CACNA2D4, CACNB4, CHRM2, DMD, DMPK, EHD3, GJC1, HDAC4, HRC, KCNH2, KCNIP1, KCNIP4, KCNQ1, PDE4D, SGCD, SPTBN4, THRA, TTN, ZC3H12A]
GO:0061337	cardiac conduction	GO_BiologicalProcess-EBI-QuickGO-GOA_20.11.2017_00h00	6.69722e-05	0.033821	5.2866e-07	2.6433e-06	[3, 6, 7]	Group3	10.3448	15	Specific for Cluster #2	[CACNB4, KCNH2, KCNIP4, PDE4D]	[ATP1B2, ATP1B3, CACNA1C, CACNA2D4, DMPK, EHD3, GJC1, HRC, KCNIP1, KCNQ1, SPTBN4]	26.6667	73.3333	[ATP1B2, ATP1B3, CACNA1C, CACNA2D4, CACNB4, DMPK, EHD3, GJC1, HRC, KCNH2, KCNIP1, KCNIP4, KCNQ1, PDE4D, SPTBN4]
GO:0008016	regulation of heart contraction	GO_BiologicalProcess-EBI-QuickGO-GOA_20.11.2017_00h00	3.72979e-05	0.0190965	5.2866e-07	2.6433e-06	[5, 6]	Group3	8.67769	21	Specific for Cluster #2	[CACNB4, KCNH2, KCNIP4, PDE4D]	[ATP1B2, ATP1B3, AVPR1A, CACNA1C, CACNA2D4, CHRM2, DMD, DMPK, EHD3, GJC1, HDAC4, HRC, KCNIP1, KCNQ1, SPTBN4, THRA, ZC3H12A]	19.0476	80.9524	[ATP1B2, ATP1B3, AVPR1A, CACNA1C, CACNA2D4, CACNB4, CHRM2, DMD, DMPK, EHD3, GJC1, HDAC4, HRC, KCNH2, KCNIP1, KCNIP4, KCNQ1, PDE4D, SPTBN4, THRA, ZC3H12A]
GO:0034765	regulation of ion transmembrane transport	GO_BiologicalProcess-EBI-QuickGO-GOA_20.11.2017_00h00	7.71546e-06	0.00407376	5.2866e-07	2.6433e-06	[5, 6]	Group3	7.32218	35	Specific for Cluster #2	[ANO1, CACNB4, FHL1, GRIN1, KCNH2, KCNIP4, PDE4D, VDAC2]	[ASIC2, ATP1B2, ATP1B3, B2M, CACNA1C, CACNA2D4, CNGA3, CRACR2A, DMD, EHD3, GJC2, HCN2, HRC, KCNAB2, KCNB1, KCNC1, KCNIP1, KCNQ1, KCNT1, MYO5A, NETO2, NLGN2, OSR1, REST, STK39, TPCN1, TRPM5]	22.8571	77.1429	[ANO1, ASIC2, ATP1B2, ATP1B3, B2M, CACNA1C, CACNA2D4, CACNB4, CNGA3, CRACR2A, DMD, EHD3, FHL1, GJC2, GRIN1, HCN2, HRC, KCNAB2, KCNB1, KCNC1, KCNH2, KCNIP1, KCNIP4, KCNQ1, KCNT1, MYO5A, NETO2, NLGN2, OSR1, PDE4D, REST, STK39, TPCN1, TRPM5, VDAC2]
GO:1901379	regulation of potassium ion transmembrane transport	GO_BiologicalProcess-EBI-QuickGO-GOA_20.11.2017_00h00	1.73031e-05	0.008963	5.2866e-07	2.6433e-06	[3, 4, 7, 8, 9, 10]	Group3	15.2778	11	Specific for Cluster #2	[FHL1, KCNH2, KCNIP4]	[ATP1B2, ATP1B3, KCNAB2, KCNC1, KCNIP1, KCNQ1, NETO2, STK39]	27.2727	72.7273	[ATP1B2, ATP1B3, FHL1, KCNAB2, KCNC1, KCNH2, KCNIP1, KCNIP4, KCNQ1, NETO2, STK39]
GO:0042391	regulation of membrane potential	GO_BiologicalProcess-EBI-QuickGO-GOA_20.11.2017_00h00	7.53356e-06	0.00398525	4.9743e-08	2.98458e-07	[3]	Group4	7.58294	32	Specific for Cluster #2	[CACNB4, FHL1, GRIN1, KCNH2, ZMYND8]	[ASIC2, ATP1B2, ATP1B3, B2M, BAIAP2, CACNA1C, CNGA3, DMD, DMPK, EHD3, GJC1, GRIK1, GRIK3, HCN2, KCNB1, KCNMB3, KCNQ1, NLGN2, NRCAM, PPP1R9A, PPP3CA, PRKCZ, RIMS2, TACR1, TPCN1, TUSC2, VCP]	15.625	84.375	[ASIC2, ATP1B2, ATP1B3, B2M, BAIAP2, CACNA1C, CACNB4, CNGA3, DMD, DMPK, EHD3, FHL1, GJC1, GRIK1, GRIK3, GRIN1, HCN2, KCNB1, KCNH2, KCNMB3, KCNQ1, NLGN2, NRCAM, PPP1R9A, PPP3CA, PRKCZ, RIMS2, TACR1, TPCN1, TUSC2, VCP, ZMYND8]
GO:0051049	regulation of transport	GO_BiologicalProcess-EBI-QuickGO-GOA_20.11.2017_00h00	6.83957e-07	0.000368653	4.9743e-08	2.98458e-07	[3, 4]	Group4	5.19153	103	Specific for Cluster #2	[ADGRE2, ANO1, AP2S1, CACNB4, CTDSPL2, CXXC1, DYRK2, FHL1, GRIN1, HCAR2, HES1, HYAL2, KCNH2, KCNIP4, NLRP3, PDE4D, TNK2, VDAC2]	[AAK1, ANKRD1, AP1G1, APBB1, ASIC2, ATP1B2, ATP1B3, ATP8A2, AVPR1A, B2M, BMP7, C1QTNF1, C1QTNF2, C21orf33, CACNA1C, CACNA2D4, CD2AP, CDK5R1, CNGA3, CRACR2A, CREB1, CYFIP1, DMD, DMPK, DOC2B, EHD3, ELMOD1, EVI5L, FAF1, FGFR1, GDI1, GJC2, GRB10, GRM7, HCN2, HGS, HRC, HRH3, IL17A, KCNAB2, KCNB1, KCNC1, KCNIP1, KCNQ1, KCNT1, LLGL2, MAGI2, MAPK14, MFF, MSN, MYO5A, NAPA, NDRG4, NETO2, NLGN2, NLRP12, NOV…	17.4757	82.5243	[AAK1, ADGRE2, ANKRD1, ANO1, AP1G1, AP2S1, APBB1, ASIC2, ATP1B2, ATP1B3, ATP8A2, AVPR1A, B2M, BMP7, C1QTNF1, C1QTNF2, C21orf33, CACNA1C, CACNA2D4, CACNB4, CD2AP, CDK5R1, CNGA3, CRACR2A, CREB1, CTDSPL2, CXXC1, CYFIP1, DMD, DMPK, DOC2B, DYRK2, EHD3, ELMOD1, EVI5L, FAF1, FGFR1, FHL1, GDI1, GJC2, GRB10, GRIN1, GRM7, HCAR2, HCN2, HES1, HGS, HRC, HRH3, HYAL2, IL17A, KCNAB2, KCNB1, KCNC1, KCNH2, KCNIP1,…
GO:0006811	ion transport	GO_BiologicalProcess-EBI-QuickGO-GOA_20.11.2017_00h00	2.67248e-05	0.0137633	4.9743e-08	2.98458e-07	[4]	Group4	5.0694	84	Specific for Cluster #2	[ANO1, CACNB4, FHL1, GRIN1, KCNH2, KCNIP4, NLRP3, ORAI2, PDE4D, SLC25A38, SLC25A42, SLC2A8, SLC5A3, VDAC2]	[ACACA, ASIC2, ATP1B2, ATP1B3, ATP8A2, ATP9A, AVPR1A, B2M, CACNA1C, CACNA2D4, CNGA3, CNNM2, CRACR2A, DMD, DMPK, EHD3, FAM155A, FGFR1, FXN, GABRA6, GJC1, GJC2, GRIK1, GRIK3, GRM7, HCN2, HRC, HRH3, KCNAB2, KCNB1, KCNC1, KCNIP1, KCNMB3, KCNN1, KCNQ1, KCNT1, MICU1, MYO5A, NETO2, NLGN2, OSR1, PPP3CA, PRELID3A, PSEN2, REST, RHAG, SERINC4, SIK1, SLC17A5, SLC1A2, SLC1A4, SLC25A14, SLC25A25, SLC25A26, SLC…	16.6667	83.3333	[ACACA, ANO1, ASIC2, ATP1B2, ATP1B3, ATP8A2, ATP9A, AVPR1A, B2M, CACNA1C, CACNA2D4, CACNB4, CNGA3, CNNM2, CRACR2A, DMD, DMPK, EHD3, FAM155A, FGFR1, FHL1, FXN, GABRA6, GJC1, GJC2, GRIK1, GRIK3, GRIN1, GRM7, HCN2, HRC, HRH3, KCNAB2, KCNB1, KCNC1, KCNH2, KCNIP1, KCNIP4, KCNMB3, KCNN1, KCNQ1, KCNT1, MICU1, MYO5A, NETO2, NLGN2, NLRP3, ORAI2, OSR1, PDE4D, PPP3CA, PRELID3A, PSEN2, REST, RHAG, SERINC4, S…
GO:0043269	regulation of ion transport	GO_BiologicalProcess-EBI-QuickGO-GOA_20.11.2017_00h00	1.17898e-05	0.00616609	4.9743e-08	2.98458e-07	[4, 5]	Group4	6.43275	44	Specific for Cluster #2	[ANO1, CACNB4, FHL1, GRIN1, KCNH2, KCNIP4, NLRP3, PDE4D, VDAC2]	[ASIC2, ATP1B2, ATP1B3, ATP8A2, AVPR1A, B2M, CACNA1C, CACNA2D4, CNGA3, CRACR2A, DMD, DMPK, EHD3, GJC2, GRM7, HCN2, HRC, HRH3, KCNAB2, KCNB1, KCNC1, KCNIP1, KCNQ1, KCNT1, MYO5A, NETO2, NLGN2, OSR1, REST, SIK1, SPTBN4, STK39, TPCN1, TRPM5, TTYH1]	20.4545	79.5455	[ANO1, ASIC2, ATP1B2, ATP1B3, ATP8A2, AVPR1A, B2M, CACNA1C, CACNA2D4, CACNB4, CNGA3, CRACR2A, DMD, DMPK, EHD3, FHL1, GJC2, GRIN1, GRM7, HCN2, HRC, HRH3, KCNAB2, KCNB1, KCNC1, KCNH2, KCNIP1, KCNIP4, KCNQ1, KCNT1, MYO5A, NETO2, NLGN2, NLRP3, OSR1, PDE4D, REST, SIK1, SPTBN4, STK39, TPCN1, TRPM5, TTYH1, VDAC2]
GO:1903522	regulation of blood circulation	GO_BiologicalProcess-EBI-QuickGO-GOA_20.11.2017_00h00	9.89868e-06	0.00518691	4.9743e-08	2.98458e-07	[4, 5]	Group4	8.5034	25	Specific for Cluster #2	[CACNB4, KCNH2, KCNIP4, NLRP3, PDE4D]	[ASIC2, ATP1B2, ATP1B3, AVPR1A, CACNA1C, CACNA2D4, CHRM2, DMD, DMPK, EHD3, GJC1, HDAC4, HRC, KCNIP1, KCNMB3, KCNQ1, SPTBN4, TACR1, THRA, ZC3H12A]	20	80	[ASIC2, ATP1B2, ATP1B3, AVPR1A, CACNA1C, CACNA2D4, CACNB4, CHRM2, DMD, DMPK, EHD3, GJC1, HDAC4, HRC, KCNH2, KCNIP1, KCNIP4, KCNMB3, KCNQ1, NLRP3, PDE4D, SPTBN4, TACR1, THRA, ZC3H12A]
GO:0006812	cation transport	GO_BiologicalProcess-EBI-QuickGO-GOA_20.11.2017_00h00	2.73087e-05	0.0140367	4.9743e-08	2.98458e-07	[5]	Group4	5.49738	63	Specific for Cluster #2	[ANO1, CACNB4, FHL1, GRIN1, KCNH2, KCNIP4, ORAI2, PDE4D, SLC25A38, SLC25A42, SLC2A8, SLC5A3]	[ASIC2, ATP1B2, ATP1B3, B2M, CACNA1C, CACNA2D4, CNGA3, CNNM2, CRACR2A, DMD, DMPK, EHD3, FAM155A, GJC2, HCN2, HRC, HRH3, KCNAB2, KCNB1, KCNC1, KCNIP1, KCNMB3, KCNN1, KCNQ1, KCNT1, MICU1, MYO5A, NETO2, NLGN2, OSR1, PPP3CA, PSEN2, REST, RHAG, SERINC4, SIK1, SLC17A5, SLC1A4, SLC25A14, SLC25A25, SLC25A37, SLC40A1, SLC4A10, SLC5A12, SLC6A17, SPTBN4, STEAP3, STK39, TPCN1, TRPM5, TTYH1]	19.0476	80.9524	[ANO1, ASIC2, ATP1B2, ATP1B3, B2M, CACNA1C, CACNA2D4, CACNB4, CNGA3, CNNM2, CRACR2A, DMD, DMPK, EHD3, FAM155A, FHL1, GJC2, GRIN1, HCN2, HRC, HRH3, KCNAB2, KCNB1, KCNC1, KCNH2, KCNIP1, KCNIP4, KCNMB3, KCNN1, KCNQ1, KCNT1, MICU1, MYO5A, NETO2, NLGN2, ORAI2, OSR1, PDE4D, PPP3CA, PSEN2, REST, RHAG, SERINC4, SIK1, SLC17A5, SLC1A4, SLC25A14, SLC25A25, SLC25A37, SLC25A38, SLC25A42, SLC2A8, SLC40A1, SLC4…
GO:0034220	ion transmembrane transport	GO_BiologicalProcess-EBI-QuickGO-GOA_20.11.2017_00h00	2.16381e-05	0.0111653	4.9743e-08	2.98458e-07	[5]	Group4	5.56054	62	Specific for Cluster #2	[ANO1, CACNB4, FHL1, GRIN1, KCNH2, KCNIP4, ORAI2, PDE4D, SLC25A42, VDAC2]	[ACACA, ASIC2, ATP1B2, ATP1B3, B2M, CACNA1C, CACNA2D4, CNGA3, CNNM2, CRACR2A, DMD, EHD3, FAM155A, GABRA6, GJC1, GJC2, GRIK1, GRIK3, HCN2, HRC, KCNAB2, KCNB1, KCNC1, KCNIP1, KCNMB3, KCNN1, KCNQ1, KCNT1, MICU1, MYO5A, NETO2, NLGN2, OSR1, REST, RHAG, SLC17A5, SLC1A2, SLC1A4, SLC25A25, SLC25A37, SLC40A1, SLC4A10, SLC5A12, SLC6A17, SLC7A5, SLC7A9, STEAP3, STK39, TNPO1, TPCN1, TRPM5, TTYH1]	16.129	83.871	[ACACA, ANO1, ASIC2, ATP1B2, ATP1B3, B2M, CACNA1C, CACNA2D4, CACNB4, CNGA3, CNNM2, CRACR2A, DMD, EHD3, FAM155A, FHL1, GABRA6, GJC1, GJC2, GRIK1, GRIK3, GRIN1, HCN2, HRC, KCNAB2, KCNB1, KCNC1, KCNH2, KCNIP1, KCNIP4, KCNMB3, KCNN1, KCNQ1, KCNT1, MICU1, MYO5A, NETO2, NLGN2, ORAI2, OSR1, PDE4D, REST, RHAG, SLC17A5, SLC1A2, SLC1A4, SLC25A25, SLC25A37, SLC25A42, SLC40A1, SLC4A10, SLC5A12, SLC6A17, SLC7…
GO:0061337	cardiac conduction	GO_BiologicalProcess-EBI-QuickGO-GOA_20.11.2017_00h00	6.69722e-05	0.033821	4.9743e-08	2.98458e-07	[3, 6, 7]	Group4	10.3448	15	Specific for Cluster #2	[CACNB4, KCNH2, KCNIP4, PDE4D]	[ATP1B2, ATP1B3, CACNA1C, CACNA2D4, DMPK, EHD3, GJC1, HRC, KCNIP1, KCNQ1, SPTBN4]	26.6667	73.3333	[ATP1B2, ATP1B3, CACNA1C, CACNA2D4, CACNB4, DMPK, EHD3, GJC1, HRC, KCNH2, KCNIP1, KCNIP4, KCNQ1, PDE4D, SPTBN4]
GO:0008016	regulation of heart contraction	GO_BiologicalProcess-EBI-QuickGO-GOA_20.11.2017_00h00	3.72979e-05	0.0190965	4.9743e-08	2.98458e-07	[5, 6]	Group4	8.67769	21	Specific for Cluster #2	[CACNB4, KCNH2, KCNIP4, PDE4D]	[ATP1B2, ATP1B3, AVPR1A, CACNA1C, CACNA2D4, CHRM2, DMD, DMPK, EHD3, GJC1, HDAC4, HRC, KCNIP1, KCNQ1, SPTBN4, THRA, ZC3H12A]	19.0476	80.9524	[ATP1B2, ATP1B3, AVPR1A, CACNA1C, CACNA2D4, CACNB4, CHRM2, DMD, DMPK, EHD3, GJC1, HDAC4, HRC, KCNH2, KCNIP1, KCNIP4, KCNQ1, PDE4D, SPTBN4, THRA, ZC3H12A]
GO:0034765	regulation of ion transmembrane transport	GO_BiologicalProcess-EBI-QuickGO-GOA_20.11.2017_00h00	7.71546e-06	0.00407376	4.9743e-08	2.98458e-07	[5, 6]	Group4	7.32218	35	Specific for Cluster #2	[ANO1, CACNB4, FHL1, GRIN1, KCNH2, KCNIP4, PDE4D, VDAC2]	[ASIC2, ATP1B2, ATP1B3, B2M, CACNA1C, CACNA2D4, CNGA3, CRACR2A, DMD, EHD3, GJC2, HCN2, HRC, KCNAB2, KCNB1, KCNC1, KCNIP1, KCNQ1, KCNT1, MYO5A, NETO2, NLGN2, OSR1, REST, STK39, TPCN1, TRPM5]	22.8571	77.1429	[ANO1, ASIC2, ATP1B2, ATP1B3, B2M, CACNA1C, CACNA2D4, CACNB4, CNGA3, CRACR2A, DMD, EHD3, FHL1, GJC2, GRIN1, HCN2, HRC, KCNAB2, KCNB1, KCNC1, KCNH2, KCNIP1, KCNIP4, KCNQ1, KCNT1, MYO5A, NETO2, NLGN2, OSR1, PDE4D, REST, STK39, TPCN1, TRPM5, VDAC2]
GO:0030001	metal ion transport	GO_BiologicalProcess-EBI-QuickGO-GOA_20.11.2017_00h00	5.24857e-05	0.0266103	4.9743e-08	2.98458e-07	[6]	Group4	5.74972	51	Specific for Cluster #2	[CACNB4, FHL1, GRIN1, KCNH2, KCNIP4, ORAI2, PDE4D, SLC5A3]	[ASIC2, ATP1B2, ATP1B3, B2M, CACNA1C, CACNA2D4, CNGA3, CNNM2, CRACR2A, DMD, DMPK, EHD3, FAM155A, GJC2, HCN2, HRC, KCNAB2, KCNB1, KCNC1, KCNIP1, KCNMB3, KCNN1, KCNQ1, KCNT1, MICU1, MYO5A, NETO2, OSR1, PPP3CA, PSEN2, REST, SIK1, SLC25A25, SLC25A37, SLC40A1, SLC4A10, SLC5A12, SPTBN4, STEAP3, STK39, TPCN1, TRPM5, TTYH1]	15.6863	84.3137	[ASIC2, ATP1B2, ATP1B3, B2M, CACNA1C, CACNA2D4, CACNB4, CNGA3, CNNM2, CRACR2A, DMD, DMPK, EHD3, FAM155A, FHL1, GJC2, GRIN1, HCN2, HRC, KCNAB2, KCNB1, KCNC1, KCNH2, KCNIP1, KCNIP4, KCNMB3, KCNN1, KCNQ1, KCNT1, MICU1, MYO5A, NETO2, ORAI2, OSR1, PDE4D, PPP3CA, PSEN2, REST, SIK1, SLC25A25, SLC25A37, SLC40A1, SLC4A10, SLC5A12, SLC5A3, SPTBN4, STEAP3, STK39, TPCN1, TRPM5, TTYH1]
GO:0071805	potassium ion transmembrane transport	GO_BiologicalProcess-EBI-QuickGO-GOA_20.11.2017_00h00	1.89043e-05	0.00977353	4.9743e-08	2.98458e-07	[3, 8, 9]	Group4	9.69388	19	Specific for Cluster #2	[FHL1, KCNH2, KCNIP4]	[ATP1B2, ATP1B3, CNGA3, HCN2, KCNAB2, KCNB1, KCNC1, KCNIP1, KCNMB3, KCNN1, KCNQ1, KCNT1, NETO2, REST, STK39, TRPM5]	15.7895	84.2105	[ATP1B2, ATP1B3, CNGA3, FHL1, HCN2, KCNAB2, KCNB1, KCNC1, KCNH2, KCNIP1, KCNIP4, KCNMB3, KCNN1, KCNQ1, KCNT1, NETO2, REST, STK39, TRPM5]
GO:1901379	regulation of potassium ion transmembrane transport	GO_BiologicalProcess-EBI-QuickGO-GOA_20.11.2017_00h00	1.73031e-05	0.008963	4.9743e-08	2.98458e-07	[3, 4, 7, 8, 9, 10]	Group4	15.2778	11	Specific for Cluster #2	[FHL1, KCNH2, KCNIP4]	[ATP1B2, ATP1B3, KCNAB2, KCNC1, KCNIP1, KCNQ1, NETO2, STK39]	27.2727	72.7273	[ATP1B2, ATP1B3, FHL1, KCNAB2, KCNC1, KCNH2, KCNIP1, KCNIP4, KCNQ1, NETO2, STK39]
GO:0098662	inorganic cation transmembrane transport	GO_BiologicalProcess-EBI-QuickGO-GOA_20.11.2017_00h00	9.95574e-05	0.0499778	4.9743e-08	2.98458e-07	[7]	Group4	5.95399	44	Specific for Cluster #2	[CACNB4, FHL1, GRIN1, KCNH2, KCNIP4, ORAI2, PDE4D]	[ASIC2, ATP1B2, ATP1B3, B2M, CACNA1C, CACNA2D4, CNGA3, CNNM2, CRACR2A, DMD, EHD3, FAM155A, GJC2, HCN2, HRC, KCNAB2, KCNB1, KCNC1, KCNIP1, KCNMB3, KCNN1, KCNQ1, KCNT1, MICU1, MYO5A, NETO2, OSR1, REST, SLC25A25, SLC25A37, SLC40A1, SLC4A10, STEAP3, STK39, TPCN1, TRPM5, TTYH1]	15.9091	84.0909	[ASIC2, ATP1B2, ATP1B3, B2M, CACNA1C, CACNA2D4, CACNB4, CNGA3, CNNM2, CRACR2A, DMD, EHD3, FAM155A, FHL1, GJC2, GRIN1, HCN2, HRC, KCNAB2, KCNB1, KCNC1, KCNH2, KCNIP1, KCNIP4, KCNMB3, KCNN1, KCNQ1, KCNT1, MICU1, MYO5A, NETO2, ORAI2, OSR1, PDE4D, REST, SLC25A25, SLC25A37, SLC40A1, SLC4A10, STEAP3, STK39, TPCN1, TRPM5, TTYH1]
GO:0030030	cell projection organization	GO_BiologicalProcess-EBI-QuickGO-GOA_20.11.2017_00h00	3.29161e-06	0.00174455	4.29115e-05	0.000128735	[3]	Group5	5.40541	80	Specific for Cluster #2	[CPEB3, CXXC1, FEZ2, GRIN1, HES1, LGI1, MAP2, OLFM1, PLXNB1, PPP1R9B, RAP1GAP, TMEM107, TSKU, TTC8, UNC5B, VASP, ZMYND8, ZNF335]	[AGRN, ANKRD1, APBB1, APBB2, ARHGEF4, ATP8A2, B2M, BAIAP2, BMP7, C21orf33, CARMIL1, CD2AP, CDK5R1, CERS2, CNTN2, COBL, CREB1, CSMD3, CTNND2, CYFIP1, DCTN2, DMD, DNAH6, EFNB2, EHD3, ENAH, EVI5L, EXT1, FAM92B, FGFR1, GDI1, GRB10, HDAC4, IFT46, JAM3, KIAA0319, LAMC1, LRRC4C, MAGI2, MAP6, MEGF8, NDE1, NDRG4, NRCAM, NRG1, PKN1, PPP1R9A, PPP3CA, PRKCZ, PRKG1, PSD, RAPGEF2, RAPH1, RIMS2, SEMA3F, SEPT7, …	22.5	77.5	[AGRN, ANKRD1, APBB1, APBB2, ARHGEF4, ATP8A2, B2M, BAIAP2, BMP7, C21orf33, CARMIL1, CD2AP, CDK5R1, CERS2, CNTN2, COBL, CPEB3, CREB1, CSMD3, CTNND2, CXXC1, CYFIP1, DCTN2, DMD, DNAH6, EFNB2, EHD3, ENAH, EVI5L, EXT1, FAM92B, FEZ2, FGFR1, GDI1, GRB10, GRIN1, HDAC4, HES1, IFT46, JAM3, KIAA0319, LAMC1, LGI1, LRRC4C, MAGI2, MAP2, MAP6, MEGF8, NDE1, NDRG4, NRCAM, NRG1, OLFM1, PKN1, PLXNB1, PPP1R9A, PPP1R…
GO:0032989	cellular component morphogenesis	GO_BiologicalProcess-EBI-QuickGO-GOA_20.11.2017_00h00	1.76906e-06	0.000939369	4.29115e-05	0.000128735	[3, 4]	Group5	5.93692	64	Specific for Cluster #2	[CXXC1, FEZ2, GRIN1, HES1, LGI1, MAP2, MYOM2, OLFM1, PLXNB1, POLDIP2, RAP1GAP, RASA1, TSKU, UNC5B, VASP, VRK3, ZNF335]	[ANKRD1, APBB1, APBB2, ATP8A2, BAIAP2, BMP7, C21orf33, CARMIL1, CDK5R1, CNTN2, COBL, CREB1, CRYGB, CTNND2, CYFIP1, DLC1, EFNB2, ENAH, EXT1, GDI1, GRB10, LAMC1, LRRC4C, MAP6, MAPK14, MEGF8, MFF, MSN, MYH11, NRCAM, NRG1, PKN1, PPP1R9A, PPP3CA, PRKCZ, RADIL, RAPGEF2, RAPH1, RIMS2, SEMA3F, SEPT7, SPTBN4, SS18L1, TAL1, TCTN1, TTBK1, TTN]	26.5625	73.4375	[ANKRD1, APBB1, APBB2, ATP8A2, BAIAP2, BMP7, C21orf33, CARMIL1, CDK5R1, CNTN2, COBL, CREB1, CRYGB, CTNND2, CXXC1, CYFIP1, DLC1, EFNB2, ENAH, EXT1, FEZ2, GDI1, GRB10, GRIN1, HES1, LAMC1, LGI1, LRRC4C, MAP2, MAP6, MAPK14, MEGF8, MFF, MSN, MYH11, MYOM2, NRCAM, NRG1, OLFM1, PKN1, PLXNB1, POLDIP2, PPP1R9A, PPP3CA, PRKCZ, RADIL, RAP1GAP, RAPGEF2, RAPH1, RASA1, RIMS2, SEMA3F, SEPT7, SPTBN4, SS18L1, TAL1…
GO:0000902	cell morphogenesis	GO_BiologicalProcess-EBI-QuickGO-GOA_20.11.2017_00h00	9.32929e-06	0.00490721	4.29115e-05	0.000128735	[4, 5]	Group5	5.90031	58	Specific for Cluster #2	[CXXC1, FEZ2, GRIN1, HES1, LGI1, MAP2, OLFM1, PLXNB1, RAP1GAP, RASA1, TSKU, UNC5B, VASP, VRK3, ZNF335]	[APBB1, APBB2, ATP8A2, BAIAP2, BMP7, C21orf33, CARMIL1, CDK5R1, CNTN2, COBL, CREB1, CRYGB, CTNND2, CYFIP1, DLC1, EFNB2, ENAH, EXT1, GDI1, GRB10, LAMC1, LRRC4C, MAP6, MAPK14, MEGF8, MSN, NRCAM, NRG1, PKN1, PPP1R9A, PPP3CA, PRKCZ, RADIL, RAPGEF2, RAPH1, RIMS2, SEMA3F, SEPT7, SPTBN4, SS18L1, TAL1, TCTN1, TTBK1]	25.8621	74.1379	[APBB1, APBB2, ATP8A2, BAIAP2, BMP7, C21orf33, CARMIL1, CDK5R1, CNTN2, COBL, CREB1, CRYGB, CTNND2, CXXC1, CYFIP1, DLC1, EFNB2, ENAH, EXT1, FEZ2, GDI1, GRB10, GRIN1, HES1, LAMC1, LGI1, LRRC4C, MAP2, MAP6, MAPK14, MEGF8, MSN, NRCAM, NRG1, OLFM1, PKN1, PLXNB1, PPP1R9A, PPP3CA, PRKCZ, RADIL, RAP1GAP, RAPGEF2, RAPH1, RASA1, RIMS2, SEMA3F, SEPT7, SPTBN4, SS18L1, TAL1, TCTN1, TSKU, TTBK1, UNC5B, VASP, V…
GO:0032990	cell part morphogenesis	GO_BiologicalProcess-EBI-QuickGO-GOA_20.11.2017_00h00	3.80791e-07	0.000206389	4.29115e-05	0.000128735	[4, 5]	Group5	7.11044	47	Specific for Cluster #2	[CXXC1, FEZ2, GRIN1, LGI1, MAP2, OLFM1, PLXNB1, POLDIP2, RAP1GAP, TSKU, UNC5B, VASP, ZNF335]	[APBB1, APBB2, ATP8A2, BAIAP2, BMP7, CDK5R1, CNTN2, COBL, CREB1, CTNND2, CYFIP1, EFNB2, ENAH, EXT1, GDI1, GRB10, LAMC1, LRRC4C, MAP6, MEGF8, MFF, NRCAM, NRG1, PKN1, PPP1R9A, PPP3CA, PRKCZ, RAPGEF2, RAPH1, RIMS2, SEMA3F, SPTBN4, SS18L1, TCTN1]	27.6596	72.3404	[APBB1, APBB2, ATP8A2, BAIAP2, BMP7, CDK5R1, CNTN2, COBL, CREB1, CTNND2, CXXC1, CYFIP1, EFNB2, ENAH, EXT1, FEZ2, GDI1, GRB10, GRIN1, LAMC1, LGI1, LRRC4C, MAP2, MAP6, MEGF8, MFF, NRCAM, NRG1, OLFM1, PKN1, PLXNB1, POLDIP2, PPP1R9A, PPP3CA, PRKCZ, RAP1GAP, RAPGEF2, RAPH1, RIMS2, SEMA3F, SPTBN4, SS18L1, TCTN1, TSKU, UNC5B, VASP, ZNF335]
GO:0060284	regulation of cell development	GO_BiologicalProcess-EBI-QuickGO-GOA_20.11.2017_00h00	1.71531e-05	0.00890246	4.29115e-05	0.000128735	[4, 5]	Group5	5.97701	52	Specific for Cluster #2	[CPEB3, CXXC1, GRIN1, HES1, LIN28A, MAP2, OLFM1, PLXNB1, SOCS2, TGIF2, ZMYND8, ZNF335]	[ANKRD1, APBB1, ATP8A2, B2M, BAIAP2, BMP7, C21orf33, CARMIL1, CDK5R1, CERS2, CNTN2, COBL, CREB1, CSMD3, CYFIP1, DMD, EFNB2, FGFR1, GDI1, GJC2, GPRC5B, HDAC4, KIAA0319, LRRC4C, MAGI2, MEGF8, NDRG4, NF2, NRCAM, NRG1, PKN1, PPP1R9A, PPP3CA, RAPGEF2, REST, RIMS2, SEMA3F, SLC45A3, SS18L1, TTBK1]	23.0769	76.9231	[ANKRD1, APBB1, ATP8A2, B2M, BAIAP2, BMP7, C21orf33, CARMIL1, CDK5R1, CERS2, CNTN2, COBL, CPEB3, CREB1, CSMD3, CXXC1, CYFIP1, DMD, EFNB2, FGFR1, GDI1, GJC2, GPRC5B, GRIN1, HDAC4, HES1, KIAA0319, LIN28A, LRRC4C, MAGI2, MAP2, MEGF8, NDRG4, NF2, NRCAM, NRG1, OLFM1, PKN1, PLXNB1, PPP1R9A, PPP3CA, RAPGEF2, REST, RIMS2, SEMA3F, SLC45A3, SOCS2, SS18L1, TGIF2, TTBK1, ZMYND8, ZNF335]
GO:0000904	cell morphogenesis involved in differentiation	GO_BiologicalProcess-EBI-QuickGO-GOA_20.11.2017_00h00	1.04667e-06	0.000562064	4.29115e-05	0.000128735	[4, 5, 6]	Group5	6.77966	48	Specific for Cluster #2	[CXXC1, FEZ2, GRIN1, HES1, LGI1, MAP2, OLFM1, PLXNB1, RAP1GAP, TSKU, UNC5B, VASP]	[APBB1, APBB2, ATP8A2, BAIAP2, BMP7, C21orf33, CARMIL1, CDK5R1, CNTN2, COBL, CREB1, CRYGB, CTNND2, CYFIP1, EFNB2, ENAH, EXT1, GDI1, GRB10, LAMC1, LRRC4C, MAP6, MEGF8, NRCAM, NRG1, PKN1, PPP1R9A, PPP3CA, RADIL, RAPGEF2, RAPH1, SEMA3F, SPTBN4, SS18L1, TAL1, TCTN1]	25	75	[APBB1, APBB2, ATP8A2, BAIAP2, BMP7, C21orf33, CARMIL1, CDK5R1, CNTN2, COBL, CREB1, CRYGB, CTNND2, CXXC1, CYFIP1, EFNB2, ENAH, EXT1, FEZ2, GDI1, GRB10, GRIN1, HES1, LAMC1, LGI1, LRRC4C, MAP2, MAP6, MEGF8, NRCAM, NRG1, OLFM1, PKN1, PLXNB1, PPP1R9A, PPP3CA, RADIL, RAP1GAP, RAPGEF2, RAPH1, SEMA3F, SPTBN4, SS18L1, TAL1, TCTN1, TSKU, UNC5B, VASP]
GO:0031346	positive regulation of cell projection organization	GO_BiologicalProcess-EBI-QuickGO-GOA_20.11.2017_00h00	4.72594e-05	0.0240078	4.29115e-05	0.000128735	[4, 5, 6]	Group5	7.52089	27	Specific for Cluster #2	[CPEB3, PLXNB1, ZMYND8]	[AGRN, ANKRD1, APBB1, ATP8A2, BAIAP2, BMP7, CARMIL1, COBL, CYFIP1, DMD, FGFR1, GDI1, HDAC4, MAGI2, MEGF8, NDRG4, NRG1, PKN1, PPP1R9A, RAPGEF2, RIMS2, SEPT7, SEPT9, SS18L1]	11.1111	88.8889	[AGRN, ANKRD1, APBB1, ATP8A2, BAIAP2, BMP7, CARMIL1, COBL, CPEB3, CYFIP1, DMD, FGFR1, GDI1, HDAC4, MAGI2, MEGF8, NDRG4, NRG1, PKN1, PLXNB1, PPP1R9A, RAPGEF2, RIMS2, SEPT7, SEPT9, SS18L1, ZMYND8]
GO:0051960	regulation of nervous system development	GO_BiologicalProcess-EBI-QuickGO-GOA_20.11.2017_00h00	1.62894e-06	0.000866593	4.29115e-05	0.000128735	[4, 5, 6]	Group5	6.42093	54	Specific for Cluster #2	[CPEB3, CXXC1, GRIN1, HES1, LIN28A, MAP2, OLFM1, PLXNB1, SOCS2, TGIF2, ZMYND8, ZNF335]	[AGRN, ANKRD1, APBB1, ASIC2, ATP8A2, B2M, BAIAP2, BMP7, C21orf33, CDK5R1, CERS2, CNTN2, COBL, CREB1, CSMD3, CYFIP1, DMD, EFNB2, FGFR1, GDI1, GJC2, GPRC5B, KIAA0319, LRRC4B, LRRC4C, MAGI2, MEGF8, NDRG4, NF2, NLGN2, NRCAM, NRG1, PKN1, PPP1R9A, PPP3CA, RAPGEF2, REST, RIMS2, SEMA3F, SLC45A3, SS18L1, TTBK1]	22.2222	77.7778	[AGRN, ANKRD1, APBB1, ASIC2, ATP8A2, B2M, BAIAP2, BMP7, C21orf33, CDK5R1, CERS2, CNTN2, COBL, CPEB3, CREB1, CSMD3, CXXC1, CYFIP1, DMD, EFNB2, FGFR1, GDI1, GJC2, GPRC5B, GRIN1, HES1, KIAA0319, LIN28A, LRRC4B, LRRC4C, MAGI2, MAP2, MEGF8, NDRG4, NF2, NLGN2, NRCAM, NRG1, OLFM1, PKN1, PLXNB1, PPP1R9A, PPP3CA, RAPGEF2, REST, RIMS2, SEMA3F, SLC45A3, SOCS2, SS18L1, TGIF2, TTBK1, ZMYND8, ZNF335]
GO:0051962	positive regulation of nervous system development	GO_BiologicalProcess-EBI-QuickGO-GOA_20.11.2017_00h00	9.05997e-06	0.0047746	4.29115e-05	0.000128735	[3, 4, 5, 6, 7]	Group5	7.08661	36	Specific for Cluster #2	[CPEB3, HES1, LIN28A, PLXNB1, SOCS2, TGIF2, ZMYND8, ZNF335]	[AGRN, ANKRD1, APBB1, ASIC2, ATP8A2, BAIAP2, BMP7, C21orf33, COBL, CYFIP1, DMD, FGFR1, GDI1, GJC2, GPRC5B, LRRC4B, MAGI2, MEGF8, NDRG4, NLGN2, NRCAM, NRG1, PKN1, PPP1R9A, RAPGEF2, RIMS2, SS18L1, TTBK1]	22.2222	77.7778	[AGRN, ANKRD1, APBB1, ASIC2, ATP8A2, BAIAP2, BMP7, C21orf33, COBL, CPEB3, CYFIP1, DMD, FGFR1, GDI1, GJC2, GPRC5B, HES1, LIN28A, LRRC4B, MAGI2, MEGF8, NDRG4, NLGN2, NRCAM, NRG1, PKN1, PLXNB1, PPP1R9A, RAPGEF2, RIMS2, SOCS2, SS18L1, TGIF2, TTBK1, ZMYND8, ZNF335]
GO:0120035	regulation of plasma membrane bounded cell projection organization	GO_BiologicalProcess-EBI-QuickGO-GOA_20.11.2017_00h00	9.15977e-07	0.000492796	4.29115e-05	0.000128735	[5, 6]	Group5	7.17781	44	Specific for Cluster #2	[CPEB3, CXXC1, GRIN1, MAP2, OLFM1, PLXNB1, RAP1GAP, ZMYND8]	[AGRN, ANKRD1, APBB1, ATP8A2, B2M, BAIAP2, BMP7, CARMIL1, CDK5R1, CERS2, CNTN2, COBL, CSMD3, CYFIP1, DMD, EFNB2, EVI5L, FGFR1, GDI1, HDAC4, KIAA0319, LRRC4C, MAGI2, MEGF8, NDRG4, NRCAM, NRG1, PKN1, PPP1R9A, PPP3CA, RAPGEF2, RIMS2, SEMA3F, SEPT7, SEPT9, SS18L1]	18.1818	81.8182	[AGRN, ANKRD1, APBB1, ATP8A2, B2M, BAIAP2, BMP7, CARMIL1, CDK5R1, CERS2, CNTN2, COBL, CPEB3, CSMD3, CXXC1, CYFIP1, DMD, EFNB2, EVI5L, FGFR1, GDI1, GRIN1, HDAC4, KIAA0319, LRRC4C, MAGI2, MAP2, MEGF8, NDRG4, NRCAM, NRG1, OLFM1, PKN1, PLXNB1, PPP1R9A, PPP3CA, RAP1GAP, RAPGEF2, RIMS2, SEMA3F, SEPT7, SEPT9, SS18L1, ZMYND8]
GO:0048699	generation of neurons	GO_BiologicalProcess-EBI-QuickGO-GOA_20.11.2017_00h00	9.51833e-06	0.00499712	4.29115e-05	0.000128735	[5, 6, 7]	Group5	5.29891	78	Specific for Cluster #2	[CPEB3, CXXC1, FEZ2, GRIN1, HES1, LGI1, LIN28A, MAP2, OLFM1, PLXNB1, RAP1GAP, SOCS2, TGIF2, TSKU, UNC5B, VASP, ZMYND8, ZNF335]	[AGRN, ANKRD1, APBB1, APBB2, ATP8A2, B2M, BAIAP2, BMP7, C21orf33, CDK5R1, CERS2, CNTN2, COBL, CREB1, CSMD3, CTNND2, CYFIP1, DMD, EFNB2, EMX2, ENAH, EXT1, FGFR1, GDI1, GJC2, GPRC5B, GRB10, JAM3, KIAA0319, LAMC1, LRRC4C, MAGI2, MAP6, MEGF8, NAPA, NAV1, NDE1, NDRG4, NF2, NRCAM, NRG1, PKN1, PPP1R9A, PPP3CA, PRKCZ, PRKG1, PSD, RAPGEF2, RAPH1, REST, RIMS2, RUNX3, SEMA3F, SLC45A3, SLC4A10, SPTBN4, SS18L…	23.0769	76.9231	[AGRN, ANKRD1, APBB1, APBB2, ATP8A2, B2M, BAIAP2, BMP7, C21orf33, CDK5R1, CERS2, CNTN2, COBL, CPEB3, CREB1, CSMD3, CTNND2, CXXC1, CYFIP1, DMD, EFNB2, EMX2, ENAH, EXT1, FEZ2, FGFR1, GDI1, GJC2, GPRC5B, GRB10, GRIN1, HES1, JAM3, KIAA0319, LAMC1, LGI1, LIN28A, LRRC4C, MAGI2, MAP2, MAP6, MEGF8, NAPA, NAV1, NDE1, NDRG4, NF2, NRCAM, NRG1, OLFM1, PKN1, PLXNB1, PPP1R9A, PPP3CA, PRKCZ, PRKG1, PSD, RAP1GAP…
GO:0030182	neuron differentiation	GO_BiologicalProcess-EBI-QuickGO-GOA_20.11.2017_00h00	1.58937e-05	0.0082806	4.29115e-05	0.000128735	[4, 6, 7, 8]	Group5	5.38922	72	Specific for Cluster #2	[CPEB3, CXXC1, FEZ2, GRIN1, HES1, LGI1, LIN28A, MAP2, OLFM1, PLXNB1, RAP1GAP, SOCS2, TGIF2, TSKU, UNC5B, VASP, ZMYND8, ZNF335]	[AGRN, ANKRD1, APBB1, APBB2, ATP8A2, B2M, BAIAP2, BMP7, C21orf33, CDK5R1, CERS2, CNTN2, COBL, CREB1, CSMD3, CTNND2, CYFIP1, DMD, EFNB2, EMX2, ENAH, EXT1, FGFR1, GDI1, GPRC5B, GRB10, JAM3, KIAA0319, LAMC1, LRRC4C, MAGI2, MAP6, MEGF8, NAPA, NDRG4, NRCAM, NRG1, PKN1, PPP1R9A, PPP3CA, PRKCZ, PRKG1, PSD, RAPGEF2, RAPH1, REST, RIMS2, RUNX3, SEMA3F, SLC4A10, SPTBN4, SS18L1, TAL1, TCTN1]	25	75	[AGRN, ANKRD1, APBB1, APBB2, ATP8A2, B2M, BAIAP2, BMP7, C21orf33, CDK5R1, CERS2, CNTN2, COBL, CPEB3, CREB1, CSMD3, CTNND2, CXXC1, CYFIP1, DMD, EFNB2, EMX2, ENAH, EXT1, FEZ2, FGFR1, GDI1, GPRC5B, GRB10, GRIN1, HES1, JAM3, KIAA0319, LAMC1, LGI1, LIN28A, LRRC4C, MAGI2, MAP2, MAP6, MEGF8, NAPA, NDRG4, NRCAM, NRG1, OLFM1, PKN1, PLXNB1, PPP1R9A, PPP3CA, PRKCZ, PRKG1, PSD, RAP1GAP, RAPGEF2, RAPH1, REST,…
GO:0048666	neuron development	GO_BiologicalProcess-EBI-QuickGO-GOA_20.11.2017_00h00	1.54045e-06	0.000821062	4.29115e-05	0.000128735	[4, 5, 7, 8, 9]	Group5	5.98131	64	Specific for Cluster #2	[CPEB3, CXXC1, FEZ2, GRIN1, HES1, LGI1, MAP2, OLFM1, PLXNB1, RAP1GAP, TSKU, UNC5B, VASP, ZMYND8, ZNF335]	[AGRN, ANKRD1, APBB1, APBB2, ATP8A2, B2M, BAIAP2, BMP7, C21orf33, CDK5R1, CERS2, CNTN2, COBL, CREB1, CSMD3, CTNND2, CYFIP1, DMD, EFNB2, ENAH, EXT1, FGFR1, GDI1, GRB10, JAM3, KIAA0319, LAMC1, LRRC4C, MAGI2, MAP6, MEGF8, NDRG4, NRCAM, NRG1, PKN1, PPP1R9A, PPP3CA, PRKCZ, PRKG1, PSD, RAPGEF2, RAPH1, RIMS2, RUNX3, SEMA3F, SLC4A10, SPTBN4, SS18L1, TCTN1]	23.4375	76.5625	[AGRN, ANKRD1, APBB1, APBB2, ATP8A2, B2M, BAIAP2, BMP7, C21orf33, CDK5R1, CERS2, CNTN2, COBL, CPEB3, CREB1, CSMD3, CTNND2, CXXC1, CYFIP1, DMD, EFNB2, ENAH, EXT1, FEZ2, FGFR1, GDI1, GRB10, GRIN1, HES1, JAM3, KIAA0319, LAMC1, LGI1, LRRC4C, MAGI2, MAP2, MAP6, MEGF8, NDRG4, NRCAM, NRG1, OLFM1, PKN1, PLXNB1, PPP1R9A, PPP3CA, PRKCZ, PRKG1, PSD, RAP1GAP, RAPGEF2, RAPH1, RIMS2, RUNX3, SEMA3F, SLC4A10, SP…
GO:0050767	regulation of neurogenesis	GO_BiologicalProcess-EBI-QuickGO-GOA_20.11.2017_00h00	1.11182e-06	0.000595938	4.29115e-05	0.000128735	[5, 6, 7, 8]	Group5	6.68449	50	Specific for Cluster #2	[CPEB3, CXXC1, GRIN1, HES1, LIN28A, MAP2, OLFM1, PLXNB1, SOCS2, TGIF2, ZMYND8, ZNF335]	[ANKRD1, APBB1, ATP8A2, B2M, BAIAP2, BMP7, C21orf33, CDK5R1, CERS2, CNTN2, COBL, CREB1, CSMD3, CYFIP1, DMD, EFNB2, FGFR1, GDI1, GJC2, GPRC5B, KIAA0319, LRRC4C, MAGI2, MEGF8, NDRG4, NF2, NRCAM, NRG1, PKN1, PPP1R9A, PPP3CA, RAPGEF2, REST, RIMS2, SEMA3F, SLC45A3, SS18L1, TTBK1]	24	76	[ANKRD1, APBB1, ATP8A2, B2M, BAIAP2, BMP7, C21orf33, CDK5R1, CERS2, CNTN2, COBL, CPEB3, CREB1, CSMD3, CXXC1, CYFIP1, DMD, EFNB2, FGFR1, GDI1, GJC2, GPRC5B, GRIN1, HES1, KIAA0319, LIN28A, LRRC4C, MAGI2, MAP2, MEGF8, NDRG4, NF2, NRCAM, NRG1, OLFM1, PKN1, PLXNB1, PPP1R9A, PPP3CA, RAPGEF2, REST, RIMS2, SEMA3F, SLC45A3, SOCS2, SS18L1, TGIF2, TTBK1, ZMYND8, ZNF335]
GO:0045664	regulation of neuron differentiation	GO_BiologicalProcess-EBI-QuickGO-GOA_20.11.2017_00h00	4.87376e-07	0.000263671	4.29115e-05	0.000128735	[5, 6, 7, 8, 9]	Group5	7.23684	44	Specific for Cluster #2	[CPEB3, CXXC1, GRIN1, HES1, LIN28A, MAP2, OLFM1, PLXNB1, SOCS2, TGIF2, ZMYND8]	[ANKRD1, APBB1, ATP8A2, B2M, BAIAP2, BMP7, C21orf33, CDK5R1, CERS2, CNTN2, COBL, CSMD3, CYFIP1, DMD, EFNB2, FGFR1, GDI1, GPRC5B, KIAA0319, LRRC4C, MAGI2, MEGF8, NDRG4, NRCAM, NRG1, PKN1, PPP1R9A, PPP3CA, RAPGEF2, REST, RIMS2, SEMA3F, SS18L1]	25	75	[ANKRD1, APBB1, ATP8A2, B2M, BAIAP2, BMP7, C21orf33, CDK5R1, CERS2, CNTN2, COBL, CPEB3, CSMD3, CXXC1, CYFIP1, DMD, EFNB2, FGFR1, GDI1, GPRC5B, GRIN1, HES1, KIAA0319, LIN28A, LRRC4C, MAGI2, MAP2, MEGF8, NDRG4, NRCAM, NRG1, OLFM1, PKN1, PLXNB1, PPP1R9A, PPP3CA, RAPGEF2, REST, RIMS2, SEMA3F, SOCS2, SS18L1, TGIF2, ZMYND8]
GO:0031175	neuron projection development	GO_BiologicalProcess-EBI-QuickGO-GOA_20.11.2017_00h00	1.94925e-07	0.000106039	4.29115e-05	0.000128735	[5, 6, 8, 9, 10]	Group5	6.4482	61	Specific for Cluster #2	[CPEB3, CXXC1, FEZ2, GRIN1, HES1, LGI1, MAP2, OLFM1, PLXNB1, RAP1GAP, TSKU, UNC5B, VASP, ZMYND8, ZNF335]	[ANKRD1, APBB1, APBB2, ATP8A2, B2M, BAIAP2, BMP7, C21orf33, CDK5R1, CERS2, CNTN2, COBL, CREB1, CSMD3, CTNND2, CYFIP1, DMD, EFNB2, ENAH, EXT1, FGFR1, GDI1, GRB10, JAM3, KIAA0319, LAMC1, LRRC4C, MAGI2, MAP6, MEGF8, NDRG4, NRCAM, NRG1, PKN1, PPP1R9A, PPP3CA, PRKCZ, PRKG1, PSD, RAPGEF2, RAPH1, RIMS2, SEMA3F, SPTBN4, SS18L1, TCTN1]	24.5902	75.4098	[ANKRD1, APBB1, APBB2, ATP8A2, B2M, BAIAP2, BMP7, C21orf33, CDK5R1, CERS2, CNTN2, COBL, CPEB3, CREB1, CSMD3, CTNND2, CXXC1, CYFIP1, DMD, EFNB2, ENAH, EXT1, FEZ2, FGFR1, GDI1, GRB10, GRIN1, HES1, JAM3, KIAA0319, LAMC1, LGI1, LRRC4C, MAGI2, MAP2, MAP6, MEGF8, NDRG4, NRCAM, NRG1, OLFM1, PKN1, PLXNB1, PPP1R9A, PPP3CA, PRKCZ, PRKG1, PSD, RAP1GAP, RAPGEF2, RAPH1, RIMS2, SEMA3F, SPTBN4, SS18L1, TCTN1, T…
GO:0045666	positive regulation of neuron differentiation	GO_BiologicalProcess-EBI-QuickGO-GOA_20.11.2017_00h00	3.87181e-05	0.019785	4.29115e-05	0.000128735	[5, 6, 7, 8, 9, 10]	Group5	7.64873	27	Specific for Cluster #2	[CPEB3, LIN28A, PLXNB1, SOCS2, TGIF2, ZMYND8]	[ANKRD1, APBB1, ATP8A2, BAIAP2, BMP7, COBL, CYFIP1, DMD, FGFR1, GDI1, GPRC5B, MAGI2, MEGF8, NDRG4, NRCAM, NRG1, PKN1, PPP1R9A, RAPGEF2, RIMS2, SS18L1]	22.2222	77.7778	[ANKRD1, APBB1, ATP8A2, BAIAP2, BMP7, COBL, CPEB3, CYFIP1, DMD, FGFR1, GDI1, GPRC5B, LIN28A, MAGI2, MEGF8, NDRG4, NRCAM, NRG1, PKN1, PLXNB1, PPP1R9A, RAPGEF2, RIMS2, SOCS2, SS18L1, TGIF2, ZMYND8]
GO:0048667	cell morphogenesis involved in neuron differentiation	GO_BiologicalProcess-EBI-QuickGO-GOA_20.11.2017_00h00	7.01899e-08	3.82535e-05	4.29115e-05	0.000128735	[5, 6, 7, 8, 9, 10]	Group5	7.76014	44	Specific for Cluster #2	[CXXC1, FEZ2, GRIN1, HES1, LGI1, MAP2, OLFM1, PLXNB1, RAP1GAP, TSKU, UNC5B, VASP]	[APBB1, APBB2, ATP8A2, BAIAP2, BMP7, C21orf33, CDK5R1, CNTN2, COBL, CREB1, CTNND2, CYFIP1, EFNB2, ENAH, EXT1, GDI1, GRB10, LAMC1, LRRC4C, MAP6, MEGF8, NRCAM, NRG1, PKN1, PPP1R9A, PPP3CA, RAPGEF2, RAPH1, SEMA3F, SPTBN4, SS18L1, TCTN1]	27.2727	72.7273	[APBB1, APBB2, ATP8A2, BAIAP2, BMP7, C21orf33, CDK5R1, CNTN2, COBL, CREB1, CTNND2, CXXC1, CYFIP1, EFNB2, ENAH, EXT1, FEZ2, GDI1, GRB10, GRIN1, HES1, LAMC1, LGI1, LRRC4C, MAP2, MAP6, MEGF8, NRCAM, NRG1, OLFM1, PKN1, PLXNB1, PPP1R9A, PPP3CA, RAP1GAP, RAPGEF2, RAPH1, SEMA3F, SPTBN4, SS18L1, TCTN1, TSKU, UNC5B, VASP]
GO:0010975	regulation of neuron projection development	GO_BiologicalProcess-EBI-QuickGO-GOA_20.11.2017_00h00	2.18707e-07	0.000118758	4.29115e-05	0.000128735	[6, 7, 8, 9, 10, 11]	Group5	8.14978	37	Specific for Cluster #2	[CPEB3, CXXC1, GRIN1, MAP2, OLFM1, PLXNB1, ZMYND8]	[ANKRD1, APBB1, ATP8A2, B2M, BAIAP2, BMP7, CDK5R1, CERS2, CNTN2, COBL, CSMD3, CYFIP1, DMD, EFNB2, FGFR1, GDI1, KIAA0319, LRRC4C, MAGI2, MEGF8, NDRG4, NRCAM, NRG1, PKN1, PPP1R9A, PPP3CA, RAPGEF2, RIMS2, SEMA3F, SS18L1]	18.9189	81.0811	[ANKRD1, APBB1, ATP8A2, B2M, BAIAP2, BMP7, CDK5R1, CERS2, CNTN2, COBL, CPEB3, CSMD3, CXXC1, CYFIP1, DMD, EFNB2, FGFR1, GDI1, GRIN1, KIAA0319, LRRC4C, MAGI2, MAP2, MEGF8, NDRG4, NRCAM, NRG1, OLFM1, PKN1, PLXNB1, PPP1R9A, PPP3CA, RAPGEF2, RIMS2, SEMA3F, SS18L1, ZMYND8]
GO:0010976	positive regulation of neuron projection development	GO_BiologicalProcess-EBI-QuickGO-GOA_20.11.2017_00h00	4.04898e-05	0.0206498	4.29115e-05	0.000128735	[5, 6, 7, 8, 9, 10, 11, 12]	Group5	8.39695	22	Specific for Cluster #2	[CPEB3, PLXNB1, ZMYND8]	[ANKRD1, APBB1, ATP8A2, BAIAP2, BMP7, COBL, CYFIP1, DMD, FGFR1, GDI1, MAGI2, MEGF8, NDRG4, NRG1, PKN1, PPP1R9A, RAPGEF2, RIMS2, SS18L1]	13.6364	86.3636	[ANKRD1, APBB1, ATP8A2, BAIAP2, BMP7, COBL, CPEB3, CYFIP1, DMD, FGFR1, GDI1, MAGI2, MEGF8, NDRG4, NRG1, PKN1, PLXNB1, PPP1R9A, RAPGEF2, RIMS2, SS18L1, ZMYND8]
GO:0048812	neuron projection morphogenesis	GO_BiologicalProcess-EBI-QuickGO-GOA_20.11.2017_00h00	6.27048e-07	0.000338606	4.29115e-05	0.000128735	[6, 7, 8, 9, 10, 11]	Group5	7.2	45	Specific for Cluster #2	[CXXC1, FEZ2, GRIN1, LGI1, MAP2, OLFM1, PLXNB1, RAP1GAP, TSKU, UNC5B, VASP, ZNF335]	[APBB1, APBB2, ATP8A2, BAIAP2, BMP7, CDK5R1, CNTN2, COBL, CREB1, CTNND2, CYFIP1, EFNB2, ENAH, EXT1, GDI1, GRB10, LAMC1, LRRC4C, MAP6, MEGF8, NRCAM, NRG1, PKN1, PPP1R9A, PPP3CA, PRKCZ, RAPGEF2, RAPH1, RIMS2, SEMA3F, SPTBN4, SS18L1, TCTN1]	26.6667	73.3333	[APBB1, APBB2, ATP8A2, BAIAP2, BMP7, CDK5R1, CNTN2, COBL, CREB1, CTNND2, CXXC1, CYFIP1, EFNB2, ENAH, EXT1, FEZ2, GDI1, GRB10, GRIN1, LAMC1, LGI1, LRRC4C, MAP2, MAP6, MEGF8, NRCAM, NRG1, OLFM1, PKN1, PLXNB1, PPP1R9A, PPP3CA, PRKCZ, RAP1GAP, RAPGEF2, RAPH1, RIMS2, SEMA3F, SPTBN4, SS18L1, TCTN1, TSKU, UNC5B, VASP, ZNF335]
GO:0061564	axon development	GO_BiologicalProcess-EBI-QuickGO-GOA_20.11.2017_00h00	1.20225e-06	0.000643202	4.29115e-05	0.000128735	[6, 7, 9, 10, 11]	Group5	7.50988	38	Specific for Cluster #2	[CXXC1, FEZ2, GRIN1, LGI1, MAP2, OLFM1, PLXNB1, RAP1GAP, TSKU, UNC5B, VASP]	[APBB1, APBB2, ATP8A2, BAIAP2, BMP7, CDK5R1, CERS2, CNTN2, COBL, CREB1, CYFIP1, EFNB2, ENAH, EXT1, GDI1, GRB10, JAM3, LAMC1, LRRC4C, MEGF8, NRCAM, NRG1, PKN1, RAPH1, SEMA3F, SPTBN4, TCTN1]	28.9474	71.0526	[APBB1, APBB2, ATP8A2, BAIAP2, BMP7, CDK5R1, CERS2, CNTN2, COBL, CREB1, CXXC1, CYFIP1, EFNB2, ENAH, EXT1, FEZ2, GDI1, GRB10, GRIN1, JAM3, LAMC1, LGI1, LRRC4C, MAP2, MEGF8, NRCAM, NRG1, OLFM1, PKN1, PLXNB1, RAP1GAP, RAPH1, SEMA3F, SPTBN4, TCTN1, TSKU, UNC5B, VASP]
GO:0050773	regulation of dendrite development	GO_BiologicalProcess-EBI-QuickGO-GOA_20.11.2017_00h00	4.09845e-05	0.0208611	4.29115e-05	0.000128735	[4, 7, 8, 9, 10, 11, 12]	Group5	10.7914	15	Specific for Cluster #2	[CPEB3, GRIN1, ZMYND8]	[BAIAP2, BMP7, CDK5R1, COBL, CSMD3, CYFIP1, KIAA0319, NRG1, PPP1R9A, PPP3CA, RAPGEF2, SS18L1]	20	80	[BAIAP2, BMP7, CDK5R1, COBL, CPEB3, CSMD3, CYFIP1, GRIN1, KIAA0319, NRG1, PPP1R9A, PPP3CA, RAPGEF2, SS18L1, ZMYND8]
GO:0007409	axonogenesis	GO_BiologicalProcess-EBI-QuickGO-GOA_20.11.2017_00h00	1.2529e-06	0.000669047	4.29115e-05	0.000128735	[6, 7, 8, 9, 10, 11, 12]	Group5	7.75862	36	Specific for Cluster #2	[CXXC1, FEZ2, GRIN1, LGI1, MAP2, OLFM1, PLXNB1, RAP1GAP, TSKU, UNC5B, VASP]	[APBB1, APBB2, ATP8A2, BAIAP2, BMP7, CDK5R1, CNTN2, COBL, CREB1, CYFIP1, EFNB2, ENAH, EXT1, GDI1, GRB10, LAMC1, LRRC4C, MEGF8, NRCAM, NRG1, PKN1, RAPH1, SEMA3F, SPTBN4, TCTN1]	30.5556	69.4444	[APBB1, APBB2, ATP8A2, BAIAP2, BMP7, CDK5R1, CNTN2, COBL, CREB1, CXXC1, CYFIP1, EFNB2, ENAH, EXT1, FEZ2, GDI1, GRB10, GRIN1, LAMC1, LGI1, LRRC4C, MAP2, MEGF8, NRCAM, NRG1, OLFM1, PKN1, PLXNB1, RAP1GAP, RAPH1, SEMA3F, SPTBN4, TCTN1, TSKU, UNC5B, VASP]
