# Supplementary material for: Rainbow Trout Red Blood Cells Exposed to Viral Hemorrhagic Septicemia Virus Up-Regulate Antigen-Processing Mechanisms and MHC I&II, CD86, and CD83 Antigen-presenting Cell Markers
Source: Cells. 2019 Apr 27;8(5):386. doi: 10.3390/cells8050386 (PMC6562805; doi:10.3390/cells8050386)
Supplement: Supplementary file 1 [file cells-08-00386-s001.zip › Supplementary Table S2.xlsx]

## Sheet: RNAseq 4h FDR<0,05
GeneName	Gene description	Log₂ fold change	Fold change	P-value	FDR p-value
TMEM50A	transmembrane protein 50A	13.9998	16381.4	7.47222e-06	0.00444485
CHD2	chromodomain helicase DNA binding protein 2	13.3665	10561.5	6.10724e-05	0.017564
DNAJA4	DnaJ heat shock protein family (Hsp40) member A4	12.9021	7654.47	4.22457e-05	0.0137392
STAU1	staufen double-stranded RNA binding protein 1	12.7714	6991.35	6.83413e-05	0.0189497
PARVA	parvin alpha	12.609	6247.18	6.66573e-05	0.0185197
HIGD1C	HIG1 hypoxia inducible domain family member 1C	12.6024	6218.56	8.73625e-05	0.0220251
RPLP2	ribosomal protein lateral stalk subunit P2	12.4795	5710.86	9.61702e-05	0.0232403
ACOT11	acyl-CoA thioesterase 11	12.392	5375	0.000183702	0.0351726
HNRNPAB	heterogeneous nuclear ribonucleoprotein A/B	12.2246	4785.87	0.000218563	0.0392554
TPST2	tyrosylprotein sulfotransferase 2	12.196	4692.05	0.000222514	0.0397088
SLC35E4	solute carrier family 35 member E4	11.9027	3828.76	0.000295519	0.0469566
BBX	BBX, HMG-box containing	11.5471	2992.44	0.000224877	0.0399767
TSSC4	tumor suppressing subtransferable candidate 4	11.5311	2959.39	0.00026061	0.0432557
SPNS1	sphingolipid transporter 1 (putative)	11.5277	2952.5	0.000229165	0.040288
TAF11	TATA-box binding protein associated factor 11	11.4954	2887.09	0.000242724	0.041711
TRIOBP	TRIO and F-actin binding protein	11.3105	2539.72	0.000286589	0.0459054
SULT1A1	sulfotransferase family 1A member 1	11.2815	2489.29	0.000259432	0.0432557
MTCH1	mitochondrial carrier 1	11.2007	2353.68	0.000311362	0.0483706
PPP3CA	protein phosphatase 3 catalytic subunit alpha	9.31957	638.957	1.03338e-06	0.00122941
TRMT112	tRNA methyltransferase subunit 11-2	8.91437	482.496	4.03296e-07	0.000674762
OSTC	oligosaccharyltransferase complex non-catalytic subunit	8.77293	437.437	3.7328e-07	0.000662892
RRP15	ribosomal RNA processing 15 homolog	8.66185	405.019	4.34214e-06	0.0032104
TCHH	trichohyalin	8.60729	389.989	1.91779e-06	0.00180369
CETN2	centrin 2	8.5781	382.179	2.31447e-06	0.00206129
RBMX2	RNA binding motif protein X-linked 2	8.00118	256.209	5.09221e-07	0.000746116
NUP43	nucleoporin 43	7.90237	239.249	1.359e-07	0.000372569
PAFAH1B3	platelet activating factor acetylhydrolase 1b catalytic subunit 3	7.8667	233.407	5.58234e-06	0.00368263
AVPR1A	arginine vasopressin receptor 1A	7.61308	195.778	7.74291e-09	5.38887e-05
KEAP1	kelch like ECH associated protein 1	7.56674	189.59	1.01981e-07	0.000315451
BTG3	BTG anti-proliferation factor 3	7.50126	181.178	3.26868e-06	0.00264525
BTBD2	BTB domain containing 2	7.47859	178.353	1.28989e-07	0.000367773
PSME3	proteasome activator subunit 3	7.45041	174.903	3.06585e-06	0.00254018
SHPK	sedoheptulokinase	7.37643	166.16	5.49919e-07	0.000789133
DNAJC17	DnaJ heat shock protein family (Hsp40) member C17	7.35703	163.94	2.04885e-07	0.000483372
SPCS1	signal peptidase complex subunit 1	7.34089	162.116	6.78876e-09	4.97348e-05
DCAF7	DDB1 and CUL4 associated factor 7	7.34035	162.057	2.30692e-09	3.21111e-05
SESN1	sestrin 1	7.33594	161.562	4.40258e-08	0.00018024
ZNF81	zinc finger protein 81	7.32212	160.022	5.29501e-07	0.000767749
SPATA6L	spermatogenesis associated 6 like	7.19613	146.64	1.16874e-05	0.00574851
UBE2I	ubiquitin conjugating enzyme E2 I	7.15856	142.87	1.41e-05	0.00645608
CTBS	chitobiase	7.06227	133.646	3.95903e-06	0.00304462
ABT1	activator of basal transcription 1	7.00841	128.748	9.97104e-07	0.00121359
N4BP1	NEDD4 binding protein 1	7.0011	128.098	7.2653e-06	0.0043779
POLDIP3	DNA polymerase delta interacting protein 3	6.98832	126.968	7.24339e-05	0.0194108
PRKACA	protein kinase cAMP-activated catalytic subunit alpha	6.88354	118.073	2.39178e-07	0.000545729
CDKN2B	cyclin dependent kinase inhibitor 2B	6.87788	117.611	1.84906e-07	0.000456321
SF3B1	splicing factor 3b subunit 1	6.8765	117.499	5.40584e-08	0.000198017
UBE2W	ubiquitin conjugating enzyme E2 W	6.83305	114.012	8.53629e-06	0.00470923
STK19	serine/threonine kinase 19	6.78909	110.591	2.33882e-05	0.00884654
RTN3	reticulon 3	6.7795	109.858	1.95518e-08	0.000100797
DNAJB1	DnaJ heat shock protein family (Hsp40) member B1	6.77946	109.855	3.86226e-06	0.00299825
COPS2	COP9 signalosome subunit 2	6.7566	108.129	7.27497e-07	0.00095532
B3GALT2	beta-1,3-galactosyltransferase 2	6.71943	105.378	3.53762e-05	0.0121585
GATA2	GATA binding protein 2	6.70815	104.557	9.50203e-07	0.00119156
HMGN3	high mobility group nucleosomal binding domain 3	6.70097	104.038	3.50981e-09	3.90333e-05
SPART	spartin	6.6951	103.616	4.07253e-07	0.000674762
DAZAP1	DAZ associated protein 1	6.68438	102.849	1.42224e-08	8.24872e-05
ORMDL2	ORMDL sphingolipid biosynthesis regulator 2	6.67857	102.435	9.24227e-07	0.00116953
CCDC90B	coiled-coil domain containing 90B	6.62074	98.4105	1.66102e-07	0.000436238
STIP1	stress induced phosphoprotein 1	6.6044	97.3025	1.57441e-07	0.000421442
DYNLL2	dynein light chain LC8-type 2	6.58018	95.6824	2.48021e-08	0.000119046
GAPDH	glyceraldehyde-3-phosphate dehydrogenase	6.55777	94.2073	3.6881e-07	0.000662892
C14orf28	chromosome 14 open reading frame 28	6.55572	94.0735	5.3733e-08	0.000198017
FAM207A	family with sequence similarity 207 member A	6.51337	91.3522	1.16581e-06	0.0013193
IDI1	isopentenyl-diphosphate delta isomerase 1	6.50643	90.9142	9.61257e-07	0.00119466
CHIC1	cysteine rich hydrophobic domain 1	6.47252	88.8021	1.40361e-05	0.00645608
HSDL2	hydroxysteroid dehydrogenase like 2	6.41862	85.5457	3.81054e-05	0.0128118
ATXN2L	ataxin 2 like	6.40668	84.8402	1.57675e-06	0.00159041
HSF2	heat shock transcription factor 2	6.39935	84.4104	9.97513e-08	0.000315451
STUB1	STIP1 homology and U-box containing protein 1	6.37522	83.0104	1.98797e-05	0.00809292
NAXD	NAD(P)HX dehydratase	6.36937	82.6747	9.70482e-05	0.0233713
ATP6V1F	ATPase H+ transporting V1 subunit F	6.3692	82.6646	7.58458e-08	0.000263934
TRUB2	TruB pseudouridine synthase family member 2	6.35662	81.9471	4.36013e-06	0.0032104
PIGH	phosphatidylinositol glycan anchor biosynthesis class H	6.35099	81.6277	4.56118e-05	0.0143967
DNAJB5	DnaJ heat shock protein family (Hsp40) member B5	6.30129	78.8635	3.87719e-06	0.00299825
MRPS25	mitochondrial ribosomal protein S25	6.27881	77.6442	4.54874e-05	0.01439
LSM5	LSM5 homolog, U6 small nuclear RNA and mRNA degradation associated	6.26182	76.7354	5.21174e-06	0.00353877
GALC	galactosylceramidase	6.24827	76.018	5.87953e-05	0.0170856
NAMPT	nicotinamide phosphoribosyltransferase	6.23598	75.3732	7.56388e-06	0.00446509
POLR3GL	RNA polymerase III subunit G like	6.23072	75.099	8.59691e-05	0.0219069
ING5	inhibitor of growth family member 5	6.21009	74.0327	1.63405e-05	0.0070857
MEOX1	mesenchyme homeobox 1	6.20972	74.0137	8.45405e-08	0.000273665
PICALM	phosphatidylinositol binding clathrin assembly protein	6.19772	73.4006	2.15038e-06	0.00197881
MACO1	macoilin 1	6.18852	72.9338	4.2219e-06	0.0032104
FNTA	farnesyltransferase, CAAX box, alpha	6.17844	72.4262	7.67985e-05	0.0202462
NDUFS6	NADH:ubiquinone oxidoreductase subunit S6	6.14269	70.6535	2.16085e-06	0.00197881
MRPL46	mitochondrial ribosomal protein L46	6.14049	70.5457	4.74359e-07	0.000732384
SLTM	SAFB like transcription modulator	6.1308	70.0735	4.4744e-06	0.0032104
VBP1	VHL binding protein 1	6.12639	69.8596	1.00934e-06	0.00121359
TFG	TRK-fused gene	6.08976	68.1082	8.31853e-06	0.00467699
IFIT5	interferon induced protein with tetratricopeptide repeats 5	6.08729	67.9918	0.000109168	0.0249518
NPY1R	neuropeptide Y receptor Y1	6.08504	67.8861	0.000174422	0.0339088
UBE2D1	ubiquitin conjugating enzyme E2 D1	6.07945	67.6233	1.03797e-05	0.0053511
B3GAT1	beta-1,3-glucuronyltransferase 1	6.07885	67.5953	3.17392e-07	0.000654473
MTMR7	myotubularin related protein 7	6.07503	67.4167	9.48397e-06	0.00501579
CDC42	cell division cycle 42	6.01638	64.731	1.47613e-06	0.0015045
YWHAE	tyrosine 3-monooxygenase/tryptophan 5-monooxygenase activation protein epsilon	6.01194	64.532	1.83823e-07	0.000456321
NFRKB	nuclear factor related to kappaB binding protein	6.00609	64.2705	3.60787e-06	0.0028697
HCFC1	host cell factor C1	5.98365	63.2788	4.3675e-06	0.0032104
NXT1	nuclear transport factor 2 like export factor 1	5.94833	61.7486	8.67559e-06	0.00473568
TMA7	translation machinery associated 7 homolog	5.9384	61.3248	2.32496e-06	0.00206129
CFAP298	cilia and flagella associated protein 298	5.91549	60.3589	5.27737e-05	0.0159692
DPEP2	dipeptidase 2	5.89416	59.4728	1.25019e-05	0.00604239
DARS	aspartyl-tRNA synthetase	5.89098	59.3418	2.1163e-06	0.00197704
GDPGP1	GDP-D-glucose phosphorylase 1	5.87285	58.6007	2.28774e-05	0.00874841
HNRNPUL2	heterogeneous nuclear ribonucleoprotein U like 2	5.85089	57.7155	0.000102196	0.0238677
GNL1	G protein nucleolar 1 (putative)	5.7955	55.5416	2.05761e-05	0.0082777
RING1	ring finger protein 1	5.75745	54.0961	4.46346e-06	0.0032104
SMIM15	small integral membrane protein 15	5.75388	53.9622	2.77037e-06	0.00235135
WDR82	WD repeat domain 82	5.75172	53.8815	8.37689e-06	0.00468282
LYRM4	LYR motif containing 4	5.74929	53.791	3.39861e-06	0.00271879
TRIM65	tripartite motif containing 65	5.74466	53.6185	7.88728e-06	0.00454209
TIMM8A	translocase of inner mitochondrial membrane 8A	5.74012	53.4502	1.40625e-05	0.00645608
GJB1	gap junction protein beta 1	5.73235	53.1631	3.32555e-05	0.0116015
EMC10	ER membrane protein complex subunit 10	5.7006	52.0057	2.5179e-07	0.000556315
IKBKB	inhibitor of nuclear factor kappa B kinase subunit beta	5.69779	51.9047	5.87096e-07	0.000810811
KIAA0513	KIAA0513	5.69502	51.8051	0.000250728	0.0425092
NDE1	nudE neurodevelopment protein 1	5.67263	51.0072	0.000301466	0.047469
ADNP	activity dependent neuroprotector homeobox	5.66308	50.6707	1.22497e-06	0.00136407
NDUFS8	NADH:ubiquinone oxidoreductase core subunit S8	5.66035	50.5751	7.08277e-06	0.00434311
DPY30	dpy-30, histone methyltransferase complex regulatory subunit	5.64563	50.0615	3.29479e-05	0.0115231
NLRP1	NLR family pyrin domain containing 1	5.64446	50.021	5.80738e-06	0.00381301
RBM4	RNA binding motif protein 4	5.62479	49.3436	4.84064e-07	0.000732384
RPP38	ribonuclease P/MRP subunit p38	5.62037	49.1925	0.000100597	0.0238017
GPR137B	G protein-coupled receptor 137B	5.61957	49.1653	4.34191e-07	0.000691351
IRF2BP1	interferon regulatory factor 2 binding protein 1	5.60117	48.5424	1.31032e-06	0.00141387
USH1G	USH1 protein network component sans	5.59504	48.3363	3.92461e-05	0.0129987
BAG5	BCL2 associated athanogene 5	5.58673	48.059	0.000325197	0.049688
CNOT3	CCR4-NOT transcription complex subunit 3	5.5717	47.5609	1.99423e-05	0.00809292
PCNX1	pecanex 1	5.56246	47.257	7.85558e-06	0.00454209
BECN1	beclin 1	5.55544	47.0278	6.80761e-06	0.00423029
SIAH1	siah E3 ubiquitin protein ligase 1	5.53041	46.2187	9.15466e-07	0.00116907
ATP5IF1	ATP synthase inhibitory factor subunit 1	5.52329	45.9914	0.0002542	0.0428792
C12orf57	chromosome 12 open reading frame 57	5.51769	45.8133	2.67537e-06	0.00230001
LGALS9B	galectin 9B	5.49414	45.0715	2.32063e-05	0.00880162
JUP	junction plakoglobin	5.4934	45.0482	0.000244251	0.041793
NUF2	NUF2, NDC80 kinetochore complex component	5.48527	44.7952	0.000170424	0.0334114
NFE2L1	nuclear factor, erythroid 2 like 1	5.46695	44.23	0.000239444	0.0414031
MRPL57	mitochondrial ribosomal protein L57	5.46663	44.2201	7.58207e-06	0.00446509
TMEM189	transmembrane protein 189	5.45153	43.7597	1.52004e-05	0.00670522
NDUFV2	NADH:ubiquinone oxidoreductase core subunit V2	5.44852	43.6686	7.60247e-06	0.00446509
FAM20C	FAM20C, golgi associated secretory pathway kinase	5.44789	43.6493	0.000279089	0.0451194
GID4	GID complex subunit 4 homolog	5.44309	43.5044	0.000131758	0.0284784
SUDS3	SDS3 homolog, SIN3A corepressor complex component	5.44104	43.4426	4.43662e-05	0.0142084
NR2F1	nuclear receptor subfamily 2 group F member 1	5.4357	43.2821	1.31606e-05	0.00616798
RALYL	RALY RNA binding protein like	5.42922	43.0882	2.21781e-05	0.00862313
HNRNPH1	heterogeneous nuclear ribonucleoprotein H1	5.42315	42.9073	1.38772e-06	0.00145236
NATTL	Natterin-like protein	5.42231	42.8824	7.97029e-08	0.000264149
PDHB	pyruvate dehydrogenase E1 beta subunit	5.42048	42.828	3.69785e-07	0.000662892
WDR4	WD repeat domain 4	5.41904	42.7853	3.24427e-07	0.000654473
SUPT4H1	SPT4 homolog, DSIF elongation factor subunit	5.41869	42.775	2.43897e-05	0.00917548
ATP4A	ATPase H+/K+ transporting subunit alpha	5.41214	42.581	4.99867e-05	0.0154313
CAPN7	calpain 7	5.4116	42.5652	1.42777e-05	0.00649472
ASNSD1	asparagine synthetase domain containing 1	5.41056	42.5346	0.000269083	0.0441167
POLE3	DNA polymerase epsilon 3, accessory subunit	5.4013	42.2624	0.000232064	0.0404972
CASP1	caspase 1	5.39274	42.0124	2.57467e-05	0.0095824
GIMAP7	GTPase, IMAP family member 7	5.3861	41.8194	5.13114e-05	0.0156335
TFPT	TCF3 fusion partner	5.37421	41.4761	7.03119e-05	0.0191528
PFKFB4	6-phosphofructo-2-kinase/fructose-2,6-biphosphatase 4	5.36732	41.2784	3.54124e-07	0.000662892
KLHL13	kelch like family member 13	5.36468	41.203	8.14925e-05	0.021163
RAB18	RAB18, member RAS oncogene family	5.36209	41.129	5.5331e-06	0.0036712
TRAPPC5	trafficking protein particle complex 5	5.35837	41.0233	2.70204e-06	0.00230743
SEC13	SEC13 homolog, nuclear pore and COPII coat complex component	5.35641	40.9676	4.09973e-05	0.013459
DHX40	DEAH-box helicase 40	5.35271	40.8627	5.13554e-05	0.0156335
RAI14	retinoic acid induced 14	5.35263	40.8603	5.31155e-05	0.0160378
WRAP53	WD repeat containing antisense to TP53	5.33893	40.4743	2.43078e-07	0.000545729
BEND3	BEN domain containing 3	5.32985	40.2202	4.34425e-05	0.0140301
CYSTM1	cysteine rich transmembrane module containing 1	5.32884	40.1922	6.88119e-06	0.00425574
CAPSL	calcyphosine like	5.30532	39.5421	0.000197931	0.0369317
ATP6V1B2	ATPase H+ transporting V1 subunit B2	5.30013	39.4	1.07507e-05	0.00550165
SNRPD3	small nuclear ribonucleoprotein D3 polypeptide	5.29822	39.348	1.2891e-06	0.00140185
AS3MT	arsenite methyltransferase	5.29649	39.3009	0.000174344	0.0339088
C6orf203	chromosome 6 open reading frame 203	5.29422	39.2392	9.5588e-05	0.0231398
NT5DC2	5'-nucleotidase domain containing 2	5.27604	38.7477	3.84878e-06	0.00299825
GNE	glucosamine (UDP-N-acetyl)-2-epimerase/N-acetylmannosamine kinase	5.27412	38.6962	9.72404e-05	0.0233725
MIP18	Mitotic spindle-associated MMXD complex subunit	5.27122	38.6186	4.706e-06	0.00332514
PPHLN1	periphilin 1	5.26615	38.4829	7.04967e-05	0.0191656
STN1	STN1, CST complex subunit	5.26302	38.3995	0.000320104	0.0491255
ATP6V0A2	ATPase H+ transporting V0 subunit a2	5.26133	38.3547	0.000143166	0.0301939
RBMS1	RNA binding motif single stranded interacting protein 1	5.23079	37.5511	1.48077e-06	0.0015045
GBP2	guanylate binding protein 2	5.23034	37.5395	3.86491e-05	0.0129321
ST13	ST13, Hsp70 interacting protein	5.22954	37.5187	0.000162543	0.0325906
GJD2	gap junction protein delta 2	5.22823	37.4848	0.000161886	0.0325162
RBM17	RNA binding motif protein 17	5.22677	37.4468	3.35866e-05	0.0116877
PCM1	pericentriolar material 1	5.21097	37.039	8.78188e-05	0.0220251
EEF2	eukaryotic translation elongation factor 2	5.19208	36.5571	0.000108612	0.0249066
DUSP22	dual specificity phosphatase 22	5.17141	36.037	2.07961e-05	0.00831816
RBM47	RNA binding motif protein 47	5.17111	36.0296	7.19747e-07	0.000954145
ZNF382	zinc finger protein 382	5.16608	35.9042	5.8381e-05	0.0170007
CNBP	CCHC-type zinc finger nucleic acid binding protein	5.16536	35.8863	0.000255127	0.0428792
ARL2	ADP ribosylation factor like GTPase 2	5.16476	35.8712	0.000116814	0.0262681
AIMP1	aminoacyl tRNA synthetase complex interacting multifunctional protein 1	5.16111	35.7807	7.01272e-05	0.0191399
ZNF432	zinc finger protein 432	5.15639	35.6638	9.2923e-06	0.00495571
FUNDC2	FUN14 domain containing 2	5.14418	35.3632	2.67683e-06	0.00230001
HMGB3	high mobility group box 3	5.12124	34.8055	5.38944e-06	0.00362407
FAM104A	family with sequence similarity 104 member A	5.10876	34.5057	9.06458e-06	0.0048716
PPP1R14A	protein phosphatase 1 regulatory inhibitor subunit 14A	5.09072	34.0768	0.000113122	0.0256032
EMC6	ER membrane protein complex subunit 6	5.09033	34.0677	0.000166299	0.0329503
MZT2B	mitotic spindle organizing protein 2B	5.06121	33.387	0.000252967	0.0427845
ARPIN	actin related protein 2/3 complex inhibitor	5.05595	33.2655	3.2282e-05	0.0113472
SFMBT1	Scm like with four mbt domains 1	5.04969	33.1213	0.000204631	0.0376768
CRELD2	cysteine rich with EGF like domains 2	5.04808	33.0845	0.000110274	0.0251071
MED10	mediator complex subunit 10	5.03228	32.724	0.000132087	0.0284832
GINS1	GINS complex subunit 1	5.03015	32.6758	3.29266e-05	0.0115231
SLC7A2	solute carrier family 7 member 2	5.02707	32.6061	1.3232e-06	0.0014168
PKN1	protein kinase N1	5.02412	32.5394	0.000260725	0.0432557
PSMA6	proteasome subunit alpha 6	5.02352	32.526	5.98548e-06	0.0039115
EFCAB14	EF-hand calcium binding domain 14	5.02043	32.4565	2.92914e-05	0.0105902
C17orf75	chromosome 17 open reading frame 75	5.00258	32.0573	2.10268e-05	0.00838631
AMACR	alpha-methylacyl-CoA racemase	4.99111	31.8034	0.0001481	0.0307225
BLOC1S1	biogenesis of lysosomal organelles complex 1 subunit 1	4.98113	31.5842	1.8031e-06	0.00170736
UVSSA	UV stimulated scaffold protein A	4.97802	31.5162	3.03129e-05	0.0109311
PLP2	proteolipid protein 2	4.96767	31.2909	8.77762e-05	0.0220251
ZNF45	zinc finger protein 45	4.95443	31.005	1.20272e-05	0.00587413
OR2M3	olfactory receptor family 2 subfamily M member 3	4.95189	30.9504	2.21228e-05	0.00862313
ERRFI1	ERBB receptor feedback inhibitor 1	4.95113	30.9342	0.000273738	0.0446171
C1GALT1C1	C1GALT1 specific chaperone 1	4.94919	30.8927	6.29603e-05	0.0178504
RAPGEF6	Rap guanine nucleotide exchange factor 6	4.94524	30.8082	4.88486e-05	0.0152114
PALLD	palladin, cytoskeletal associated protein	4.9419	30.7369	0.000229438	0.040288
C19orf47	chromosome 19 open reading frame 47	4.93174	30.5212	6.417e-06	0.0040786
EIF6	eukaryotic translation initiation factor 6	4.92355	30.3484	0.00020904	0.0379861
SPAST	spastin	4.91493	30.1676	0.000178971	0.0345518
CDIPT	CDP-diacylglycerol--inositol 3-phosphatidyltransferase	4.91028	30.0707	0.000168577	0.0332366
LITAF	lipopolysaccharide induced TNF factor	4.90761	30.015	2.3151e-05	0.00880162
SEMA3F	semaphorin 3F	4.89146	29.6809	1.0226e-05	0.00533109
DPYSL2	dihydropyrimidinase like 2	4.88895	29.6293	0.000149149	0.0308023
NDUFV1	NADH:ubiquinone oxidoreductase core subunit V1	4.8748	29.3401	0.000147788	0.0307225
CD83	CD83 molecule	4.87443	29.3326	6.05436e-07	0.000826212
SRSF5	serine and arginine rich splicing factor 5	4.87148	29.2727	2.59346e-05	0.00962658
SMAD2	SMAD family member 2	4.87028	29.2484	0.000181684	0.034834
TBC1D17	TBC1 domain family member 17	4.86054	29.0515	0.000243903	0.041793
TTLL9	tubulin tyrosine ligase like 9	4.85705	28.9813	6.5887e-06	0.00413114
TMEM199	transmembrane protein 199	4.85405	28.9211	2.16139e-05	0.00854702
CCDC106	coiled-coil domain containing 106	4.83541	28.5499	1.3029e-05	0.0061477
MYLPF	myosin light chain, phosphorylatable, fast skeletal muscle	4.82784	28.4005	0.000206177	0.0377572
C1orf131	chromosome 1 open reading frame 131	4.82228	28.2912	3.23522e-06	0.00263371
MCOLN1	mucolipin 1	4.80921	28.036	1.81368e-05	0.00765015
PGPEP1	pyroglutamyl-peptidase I	4.8066	27.9854	1.76873e-06	0.00168629
BLCAP	BLCAP, apoptosis inducing factor	4.80287	27.9132	1.48535e-05	0.00664801
LYSMD3	LysM domain containing 3	4.79326	27.7278	0.000311927	0.0483781
A2M	alpha-2-macroglobulin	4.78829	27.6325	3.87617e-05	0.0129387
PPP2R3C	protein phosphatase 2 regulatory subunit B''gamma	4.78547	27.5785	0.000187948	0.0355937
HIST2H3A	histone cluster 2 H3 family member a	4.78384	27.5473	0.000171898	0.033561
CUL3	cullin 3	4.77004	27.2851	2.26856e-05	0.00869897
CYB561	cytochrome b561	4.7671	27.2295	0.000305139	0.0477234
CMPK2	cytidine/uridine monophosphate kinase 2	4.76256	27.144	7.00147e-05	0.0191399
MCOLN2	mucolipin 2	4.75551	27.0116	2.39049e-05	0.00901747
FIBP	FGF1 intracellular binding protein	4.75375	26.9787	0.000271188	0.0443057
PCDHGB3	protocadherin gamma subfamily B, 3	4.73927	26.7093	0.000164772	0.0327649
FASTKD3	FAST kinase domains 3	4.73775	26.6812	0.00012456	0.0273041
COA6	cytochrome c oxidase assembly factor 6	4.73704	26.6681	7.77892e-05	0.0203915
ALG12	ALG12, alpha-1,6-mannosyltransferase	4.71989	26.353	0.000107235	0.024672
CANT1	calcium activated nucleotidase 1	4.71088	26.1889	7.20966e-05	0.0194108
MINOS1	mitochondrial inner membrane organizing system 1	4.70397	26.0636	9.28312e-06	0.00495571
ENY2	ENY2, transcription and export complex 2 subunit	4.69762	25.9492	2.43245e-06	0.00212946
NDUFA2	NADH:ubiquinone oxidoreductase subunit A2	4.69301	25.8664	2.83369e-05	0.0103526
GCH1	GTP cyclohydrolase 1	4.67814	25.6012	1.28917e-05	0.0061477
EIF4A1	eukaryotic translation initiation factor 4A1	4.67697	25.5804	1.56762e-05	0.00686178
NDFIP1	Nedd4 family interacting protein 1	4.67478	25.5417	0.000101985	0.0238586
TRAPPC2L	trafficking protein particle complex 2 like	4.67243	25.5001	1.14091e-05	0.00565156
CCDC6	coiled-coil domain containing 6	4.66636	25.393	2.20716e-05	0.00862313
UQCRC1	ubiquinol-cytochrome c reductase core protein 1	4.6615	25.3075	5.97709e-05	0.017261
ACTR8	ARP8 actin related protein 8 homolog	4.65337	25.1653	0.000212552	0.038421
TSSK1B	testis specific serine kinase 1B	4.64721	25.0582	4.4918e-05	0.0142748
CPSF1	cleavage and polyadenylation specific factor 1	4.64266	24.9793	0.000255333	0.0428792
SERAC1	serine active site containing 1	4.64127	24.9552	1.02865e-05	0.00534262
ARFGAP2	ADP ribosylation factor GTPase activating protein 2	4.63634	24.87	1.52222e-05	0.00670522
NKX2-2	NK2 homeobox 2	4.63602	24.8645	0.000230002	0.040288
SRP14	signal recognition particle 14	4.63213	24.7976	0.000321582	0.0492981
METTL7B	methyltransferase like 7B	4.62491	24.6739	7.34679e-05	0.0195533
HDAC1	histone deacetylase 1	4.62286	24.6387	5.37431e-05	0.0161223
SPOP	speckle type BTB/POZ protein	4.61425	24.4922	0.000316521	0.0486974
GRINA	glutamate ionotropic receptor NMDA type subunit associated protein 1	4.6136	24.4812	0.000101228	0.0238416
NIPA1	NIPA magnesium transporter 1	4.60838	24.3928	0.000195408	0.036608
GCK	glucokinase	4.59766	24.2121	1.39617e-05	0.00645608
SOCS7	suppressor of cytokine signaling 7	4.59357	24.1436	2.26463e-05	0.00869897
RPS11	ribosomal protein S11	4.59278	24.1305	0.000194303	0.0365486
CAT	catalase	4.58817	24.0534	1.09699e-05	0.00556876
GRM1	glutamate metabotropic receptor 1	4.58247	23.9585	5.70243e-05	0.0167458
ZFAND3	zinc finger AN1-type containing 3	4.57265	23.7961	0.000282212	0.045373
UEVLD	UEV and lactate/malate dehyrogenase domains	4.55864	23.5661	0.000266337	0.043722
TECR	trans-2,3-enoyl-CoA reductase	4.5506	23.4351	0.000102782	0.0239644
SLC25A25	solute carrier family 25 member 25	4.54273	23.3076	0.000218904	0.0392658
CD99L2	CD99 molecule like 2	4.52755	23.0636	1.93424e-05	0.00793891
AP1G1	adaptor related protein complex 1 subunit gamma 1	4.52296	22.9904	0.000248621	0.042255
METTL26	methyltransferase like 26	4.51687	22.8936	0.000112223	0.0254411
FXN	frataxin	4.50451	22.6982	7.09734e-05	0.0192576
HNRNPA0	heterogeneous nuclear ribonucleoprotein A0	4.48745	22.4315	0.000125047	0.0273678
CCDC82	coiled-coil domain containing 82	4.48609	22.4102	0.000134604	0.0289138
CEACAM18	carcinoembryonic antigen related cell adhesion molecule 18	4.4825	22.3545	8.49074e-05	0.0218057
UBL3	ubiquitin like 3	4.46883	22.1438	0.0003094	0.0481733
PSMD12	proteasome 26S subunit, non-ATPase 12	4.46507	22.0861	2.15714e-05	0.00854702
DDX41	DEAD-box helicase 41	4.45699	21.9627	4.95419e-06	0.00343084
GPR88	G protein-coupled receptor 88	4.45536	21.938	0.000257976	0.0431225
HERPUD2	HERPUD family member 2	4.45284	21.8997	0.000228732	0.040288
TACC1	transforming acidic coiled-coil containing protein 1	4.44544	21.7877	7.25141e-05	0.0194108
USP19	ubiquitin specific peptidase 19	4.43991	21.7042	4.61918e-05	0.0145468
GBA2	glucosylceramidase beta 2	4.41879	21.3888	9.94335e-05	0.0237372
ATE1	arginyltransferase 1	4.41685	21.3601	2.0644e-05	0.00828112
PHF12	PHD finger protein 12	4.41192	21.2872	0.000227231	0.0401899
PAX6	paired box 6	4.41013	21.2609	6.8767e-05	0.0190156
RRAGC	Ras related GTP binding C	4.408	21.2296	2.55986e-05	0.00955282
NRXN2	neurexin 2	4.39032	20.971	0.000179875	0.0346302
SUCLG1	succinate-CoA ligase alpha subunit	4.38976	20.9627	6.28177e-06	0.00401097
FAM204A	family with sequence similarity 204 member A	4.37902	20.8074	0.000326928	0.049843
FBXO28	F-box protein 28	4.35575	20.4744	1.37898e-05	0.00639826
RORA	RAR related orphan receptor A	4.35201	20.4214	7.32923e-05	0.0195439
PKNOX1	PBX/knotted 1 homeobox 1	4.34875	20.3753	5.40657e-05	0.0161469
MRPS36	mitochondrial ribosomal protein S36	4.34698	20.3504	1.88219e-05	0.00786759
GATAD2B	GATA zinc finger domain containing 2B	4.34592	20.3353	0.000328738	0.0498954
NDUFB2	NADH:ubiquinone oxidoreductase subunit B2	4.33434	20.1728	1.75043e-05	0.00742837
CLEC16A	C-type lectin domain containing 16A	4.32565	20.0517	0.000227715	0.0402244
ARHGDIA	Rho GDP dissociation inhibitor alpha	4.32297	20.0144	7.47142e-06	0.00444485
CANX	calnexin	4.31891	19.9582	0.000179619	0.0346288
ARHGAP32	Rho GTPase activating protein 32	4.30901	19.8217	0.000241533	0.0416092
FGD4	FYVE, RhoGEF and PH domain containing 4	4.30726	19.7976	0.000159245	0.0322176
ZCCHC8	zinc finger CCHC-type containing 8	4.27507	19.3608	0.000275672	0.0446707
PPP1CA	protein phosphatase 1 catalytic subunit alpha	4.27485	19.3579	4.45312e-06	0.0032104
LETMD1	LETM1 domain containing 1	4.25865	19.1418	0.000304423	0.047665
ABL2	ABL proto-oncogene 2, non-receptor tyrosine kinase	4.25406	19.081	0.000101873	0.0238586
MFSD3	major facilitator superfamily domain containing 3	4.24348	18.9415	0.000184479	0.0351761
LMAN2	lectin, mannose binding 2	4.23912	18.8844	1.05996e-05	0.00544433
STX5	syntaxin 5	4.23808	18.8707	0.000221054	0.0394989
RNF212	ring finger protein 212	4.23451	18.8242	8.58923e-05	0.0219069
PPP6R2	protein phosphatase 6 regulatory subunit 2	4.20766	18.4771	9.73889e-05	0.0233725
HS6ST1	heparan sulfate 6-O-sulfotransferase 1	4.19949	18.3727	0.000164029	0.0327107
RAB11FIP3	RAB11 family interacting protein 3	4.17482	18.0612	0.000101871	0.0238586
ZNF277	zinc finger protein 277	4.16967	17.9968	2.82638e-05	0.0103526
LLGL2	LLGL2, scribble cell polarity complex component	4.15874	17.861	4.04411e-05	0.0133078
TRIM39	tripartite motif containing 39	4.13453	17.5638	0.000198364	0.0369629
TMEM18	transmembrane protein 18	4.11542	17.3326	2.90454e-05	0.0105402
RAD23A	RAD23 homolog A, nucleotide excision repair protein	4.09599	17.1007	0.000117857	0.0264173
TMEM131	transmembrane protein 131	4.08294	16.9467	0.000247527	0.0421205
CRBN	cereblon	4.07871	16.8972	9.98597e-05	0.0237439
GTF2E2	general transcription factor IIE subunit 2	4.07636	16.8697	0.000158059	0.032209
E4F1	E4F transcription factor 1	4.07564	16.8613	0.000147168	0.0307225
FAM102A	family with sequence similarity 102 member A	4.06587	16.7475	9.7021e-05	0.0233713
GTF2F2	general transcription factor IIF subunit 2	4.05495	16.6212	0.00031406	0.048519
CSTB	cystatin B	4.05073	16.5726	0.000239898	0.0414301
NFYB	nuclear transcription factor Y subunit beta	4.04492	16.506	2.79233e-05	0.0102554
LRAT	lecithin retinol acyltransferase	4.02782	16.3115	0.000299182	0.0473773
C16orf58	chromosome 16 open reading frame 58	3.98584	15.8437	0.000241883	0.0416179
TRIM16	tripartite motif containing 16	3.97146	15.6866	0.00023756	0.0411284
SPRYD3	SPRY domain containing 3	3.95021	15.4572	0.000129186	0.028097
CCT3	chaperonin containing TCP1 subunit 3	3.93191	15.2624	9.84421e-05	0.0235703
W07G4.4	#N/A	3.91905	15.1269	0.000162725	0.0325906
CKAP2	cytoskeleton associated protein 2	3.90022	14.9308	0.000233089	0.0405378
PDP1	pyruvate dehyrogenase phosphatase catalytic subunit 1	3.87748	14.6974	0.00020594	0.0377572
DNASE2	deoxyribonuclease 2, lysosomal	3.87272	14.6489	0.000108805	0.0249096
ESYT1	extended synaptotagmin 1	3.86925	14.6137	0.000158737	0.032209
FIBIN	fin bud initiation factor homolog	3.86479	14.5686	0.000183997	0.0351761
GJA5	gap junction protein alpha 5	3.85749	14.4951	0.000138395	0.0293656
CDK6	cyclin dependent kinase 6	3.85491	14.4692	0.00012343	0.0271849
PURB	purine rich element binding protein B	3.83146	14.2358	7.44858e-05	0.0197864
CENPV	centromere protein V	3.82093	14.1323	0.000159474	0.0322176
RWDD1	RWD domain containing 1	3.80831	14.0093	2.19059e-05	0.00861355
PSMB7	proteasome subunit beta 7	3.80106	13.939	3.85416e-05	0.0129272
ZMAT5	zinc finger matrin-type 5	3.76724	13.616	0.000145599	0.0305682
HNRNPL	heterogeneous nuclear ribonucleoprotein L	3.75894	13.538	8.74269e-05	0.0220251
POMGNT2	protein O-linked mannose N-acetylglucosaminyltransferase 2 (beta 1,4-)	3.75591	13.5096	0.000233275	0.0405378
FBL	fibrillarin	3.75226	13.4755	0.000257658	0.0431225
CCR5	C-C motif chemokine receptor 5 (gene/pseudogene)	3.74092	13.37	0.000161866	0.0325162
PPP1R3B	protein phosphatase 1 regulatory subunit 3B	3.73163	13.2841	0.000327938	0.0498878
DHRS1	dehydrogenase/reductase 1	3.73107	13.2789	5.35462e-05	0.016098
PSMB5	proteasome subunit beta 5	3.72794	13.2502	0.000136236	0.0291296
MED18	mediator complex subunit 18	3.7267	13.2388	0.000158557	0.032209
MED21	mediator complex subunit 21	3.7196	13.1738	0.000264919	0.0435977
PSMD6	proteasome 26S subunit, non-ATPase 6	3.71956	13.1735	6.35501e-05	0.0179066
NDUFS4	NADH:ubiquinone oxidoreductase subunit S4	3.70888	13.0763	0.000243862	0.041793
ATG9A	autophagy related 9A	3.69762	12.9746	0.000234259	0.040658
ORAI2	ORAI calcium release-activated calcium modulator 2	3.69239	12.9277	0.000226481	0.0401082
PP2D1	protein phosphatase 2C like domain containing 1	3.63948	12.4621	0.000301314	0.047469
EMC7	ER membrane protein complex subunit 7	3.63774	12.4471	0.000147974	0.0307225
TTBK1	tau tubulin kinase 1	3.62512	12.3387	0.000212182	0.0384065
TMCO3	transmembrane and coiled-coil domains 3	3.59562	12.089	0.000313718	0.048519
POLD3	DNA polymerase delta 3, accessory subunit	3.58909	12.0344	0.000229721	0.040288
MOV10	Mov10 RISC complex RNA helicase	3.57961	11.9556	0.000134215	0.0288748
TMEM87A	transmembrane protein 87A	3.55564	11.7586	0.000157581	0.032209
F2	coagulation factor II, thrombin	3.51813	11.4568	0.000216754	0.0389807
ULK1	unc-51 like autophagy activating kinase 1	3.46418	11.0362	0.000189728	0.0358334
RPL3L	ribosomal protein L3 like	3.4593	10.999	0.000176216	0.0341145
FABP7	fatty acid binding protein 7	3.44243	10.8711	0.000212814	0.038421
PPIF	peptidylprolyl isomerase F	3.41352	10.6554	0.000315501	0.0486876
LAMTOR2	late endosomal/lysosomal adaptor, MAPK and MTOR activator 2	3.3451	10.1619	0.000266362	0.043722
ALG2	ALG2, alpha-1,3/1,6-mannosyltransferase	3.28948	9.7776	0.000321959	0.0493015
RNF168	ring finger protein 168	3.24353	9.47109	0.000206978	0.0377905
EPYC	epiphycan	-3.26245	-9.59614	0.000166651	0.0329503
C6orf120	chromosome 6 open reading frame 120	-3.33205	-10.0704	0.000105933	0.0244128
PIGV	phosphatidylinositol glycan anchor biosynthesis class V	-3.42534	-10.7431	0.000259817	0.0432557
SMARCAD1	SWI/SNF-related, matrix-associated actin-dependent regulator of chromatin, subfamily a, containing DEAD/H box 1	-3.54797	-11.6962	0.000237154	0.0411092
MTFR1	mitochondrial fission regulator 1	-3.56692	-11.8509	0.000135306	0.0290199
CEP104	centrosomal protein 104	-3.59472	-12.0814	0.000282692	0.0453856
DCTN2	dynactin subunit 2	-3.60239	-12.1458	9.23071e-05	0.0227266
NEDD1	neural precursor cell expressed, developmentally down-regulated 1	-3.61107	-12.2191	0.000175221	0.0340166
FRYL	FRY like transcription coactivator	-3.66174	-12.6559	0.000103321	0.0240096
NOVA2	NOVA alternative splicing regulator 2	-3.66315	-12.6683	0.000186601	0.0353867
ATP2B1	ATPase plasma membrane Ca2+ transporting 1	-3.66502	-12.6848	5.2768e-05	0.0159692
NAA15	N(alpha)-acetyltransferase 15, NatA auxiliary subunit	-3.68185	-12.8336	0.000288866	0.0461639
CDK7	cyclin dependent kinase 7	-3.72682	-13.2399	0.000272555	0.0444763
STAT1	signal transducer and activator of transcription 1	-3.73926	-13.3546	4.12773e-05	0.0135191
CREM	cAMP responsive element modulator	-3.7475	-13.431	0.000313632	0.048519
MTHFD1	methylenetetrahydrofolate dehydrogenase, cyclohydrolase and formyltetrahydrofolate synthetase 1	-3.76414	-13.5868	3.9315e-05	0.0129987
RAB1B	RAB1B, member RAS oncogene family	-3.78125	-13.7489	0.000261827	0.043387
SYDE2	synapse defective Rho GTPase homolog 2	-3.78308	-13.7664	0.000256225	0.0429702
CERS2	ceramide synthase 2	-3.78472	-13.7821	0.000109349	0.0249521
NCAM1	neural cell adhesion molecule 1	-3.80979	-14.0236	0.000202714	0.0374142
ARSA	arylsulfatase A	-3.81071	-14.0326	0.000184364	0.0351761
RASEF	RAS and EF-hand domain containing	-3.81862	-14.1098	0.000194862	0.0366043
C18orf21	chromosome 18 open reading frame 21	-3.84693	-14.3893	0.00023324	0.0405378
FKBP3	FK506 binding protein 3	-3.85109	-14.431	0.000224847	0.0399767
ZBTB44	zinc finger and BTB domain containing 44	-3.89652	-14.8926	0.000122181	0.0269952
SCCPDH	saccharopine dehydrogenase (putative)	-3.92699	-15.2105	0.000263725	0.0435459
NAT9	N-acetyltransferase 9 (putative)	-3.93166	-15.2598	0.000287181	0.0459473
RMDN3	regulator of microtubule dynamics 3	-3.93288	-15.2727	9.306e-05	0.0227266
SRSF3	serine and arginine rich splicing factor 3	-3.95212	-15.4778	5.14396e-05	0.0156335
FAM168B	family with sequence similarity 168 member B	-3.97263	-15.6993	0.00020876	0.0379848
ZNF646	zinc finger protein 646	-3.98327	-15.8155	0.000223018	0.0397477
FBXL4	F-box and leucine rich repeat protein 4	-4.00902	-16.1003	0.000294862	0.0469067
VDAC1	voltage dependent anion channel 1	-4.02451	-16.2742	0.000130774	0.0283407
ZNF319	zinc finger protein 319	-4.04431	-16.4991	0.000169869	0.0333497
LIN28A	lin-28 homolog A	-4.0544	-16.6148	3.97373e-05	0.0131072
XPO7	exportin 7	-4.06331	-16.7178	0.000286515	0.0459054
U2AF1L5	U2 small nuclear RNA auxiliary factor 1 like 5	-4.10216	-17.1741	0.000154417	0.031749
VCAM1	vascular cell adhesion molecule 1	-4.12132	-17.4036	7.64025e-05	0.0202183
HSD17B7	hydroxysteroid 17-beta dehydrogenase 7	-4.14016	-17.6324	8.17651e-05	0.0211942
MRPL9	mitochondrial ribosomal protein L9	-4.14821	-17.7311	0.000118839	0.0265443
LHX2	LIM homeobox 2	-4.1579	-17.8506	0.000300993	0.047469
TM2D1	TM2 domain containing 1	-4.17418	-18.0531	0.000124518	0.0273041
MAPK15	mitogen-activated protein kinase 15	-4.19836	-18.3583	8.8969e-05	0.0221539
ENTPD4	ectonucleoside triphosphate diphosphohydrolase 4	-4.20167	-18.4005	0.000220179	0.0393931
CILP	cartilage intermediate layer protein	-4.20602	-18.4561	8.96592e-05	0.0222462
PSMG4	proteasome assembly chaperone 4	-4.22028	-18.6394	6.88522e-05	0.0190156
KPNA2	karyopherin subunit alpha 2	-4.22896	-18.7518	1.32627e-05	0.00619498
AGPAT3	1-acylglycerol-3-phosphate O-acyltransferase 3	-4.23238	-18.7964	7.18878e-05	0.019409
WAPL	WAPL cohesin release factor	-4.23559	-18.8381	0.00012079	0.0268156
MEA1	male-enhanced antigen 1	-4.2376	-18.8645	0.000158401	0.032209
TRIM25	tripartite motif containing 25	-4.24731	-18.9918	2.31257e-05	0.00880162
TBC1D9B	TBC1 domain family member 9B	-4.25498	-19.0931	0.000100716	0.0238017
ZHX2	zinc fingers and homeoboxes 2	-4.26556	-19.2336	0.000138961	0.0293962
PRKD2	protein kinase D2	-4.28917	-19.551	8.27856e-05	0.0213791
TMEM129	transmembrane protein 129	-4.29379	-19.6138	0.000282287	0.045373
MDH1B	malate dehydrogenase 1B	-4.29974	-19.6947	0.000158143	0.032209
ANKRD33B	ankyrin repeat domain 33B	-4.30106	-19.7128	0.00012194	0.0269849
ZBTB7C	zinc finger and BTB domain containing 7C	-4.30229	-19.7296	7.98229e-05	0.020807
NSMAF	neutral sphingomyelinase activation associated factor	-4.30932	-19.826	0.000205927	0.0377572
UTP23	UTP23, small subunit processome component	-4.31185	-19.8608	0.000166648	0.0329503
OVOL1	ovo like transcriptional repressor 1	-4.31501	-19.9043	0.000105082	0.0243156
CCDC77	coiled-coil domain containing 77	-4.32374	-20.0252	5.4926e-05	0.0162323
SUPT6H	SPT6 homolog, histone chaperone	-4.3354	-20.1877	0.000138874	0.0293962
LHPP	phospholysine phosphohistidine inorganic pyrophosphate phosphatase	-4.35065	-20.4021	0.000230345	0.040288
UBTF	upstream binding transcription factor	-4.35451	-20.4568	1.67018e-05	0.00721991
RGMA	repulsive guidance molecule BMP co-receptor a	-4.38268	-20.8602	0.000276018	0.0446748
GIT2	GIT ArfGAP 2	-4.3889	-20.9503	1.08049e-05	0.00550909
IPO7	importin 7	-4.39441	-21.0304	0.000147673	0.0307225
RNF130	ring finger protein 130	-4.41138	-21.2794	0.000205318	0.0377534
RPL18	ribosomal protein L18	-4.4287	-21.5364	0.000104489	0.0242405
PARP14	poly(ADP-ribose) polymerase family member 14	-4.45148	-21.8791	8.80522e-05	0.0220439
UTP11	UTP11, small subunit processome component	-4.45483	-21.9299	8.06816e-05	0.0209915
RPF1	ribosome production factor 1 homolog	-4.47219	-22.1955	0.000163391	0.0326696
YPEL5	yippee like 5	-4.4723	-22.1971	1.30902e-05	0.00615572
KAT8	lysine acetyltransferase 8	-4.48398	-22.3776	0.000118792	0.0265443
ELP6	elongator acetyltransferase complex subunit 6	-4.49147	-22.4941	0.000155752	0.0318822
INSR	insulin receptor	-4.49219	-22.5053	6.56667e-05	0.018281
SFRP2	secreted frizzled related protein 2	-4.49297	-22.5174	6.30943e-05	0.0178504
METTL25	methyltransferase like 25	-4.50255	-22.6675	0.000189012	0.0357466
SSSCA1	Sjogren syndrome/scleroderma autoantigen 1	-4.50396	-22.6897	0.000207999	0.0378959
BCKDK	branched chain ketoacid dehydrogenase kinase	-4.51405	-22.8489	0.000155521	0.0318822
ARCN1	archain 1	-4.51685	-22.8933	8.12272e-06	0.00463378
MRPL27	mitochondrial ribosomal protein L27	-4.52037	-22.9492	0.000185606	0.0352462
KTI12	KTI12 chromatin associated homolog	-4.52299	-22.9909	0.00031031	0.0482611
MRPL55	mitochondrial ribosomal protein L55	-4.52847	-23.0784	3.56102e-05	0.0122088
AQP10	aquaporin 10	-4.52972	-23.0984	0.000123089	0.0271528
SAFB2	scaffold attachment factor B2	-4.5349	-23.1814	0.000260288	0.0432557
SARG	Specifically androgen-regulated gene protein	-4.5389	-23.2459	0.000316615	0.0486974
KMT5A	lysine methyltransferase 5A	-4.54672	-23.3722	0.000280623	0.0452623
GK	glycerol kinase	-4.55399	-23.4902	8.87719e-05	0.0221445
PSMA2	proteasome subunit alpha 2	-4.55616	-23.5256	5.29269e-06	0.00357629
CCDC50	coiled-coil domain containing 50	-4.55786	-23.5533	0.000115507	0.0260584
MYNN	myoneurin	-4.56339	-23.6438	6.18395e-05	0.0177423
MPDU1	mannose-P-dolichol utilization defect 1	-4.57275	-23.7977	0.000329808	0.0499539
UBXN8	UBX domain protein 8	-4.57746	-23.8754	0.000270437	0.0442864
HLX	H2.0 like homeobox	-4.57976	-23.9136	0.000130917	0.0283407
WDR91	WD repeat domain 91	-4.58605	-24.0181	0.000199503	0.0370265
SPIN1	spindlin 1	-4.60396	-24.3181	0.000163588	0.0326696
HBE1	hemoglobin subunit epsilon 1	-4.60721	-24.373	0.00010855	0.0249066
UCKL1	uridine-cytidine kinase 1 like 1	-4.6183	-24.561	0.000328449	0.0498954
ATP10D	ATPase phospholipid transporting 10D (putative)	-4.62287	-24.639	9.48215e-05	0.0230343
RCOR3	REST corepressor 3	-4.62706	-24.7106	0.000326423	0.0498207
ADAMTS13	ADAM metallopeptidase with thrombospondin type 1 motif 13	-4.63049	-24.7695	0.000119403	0.0265925
HOXD9	homeobox D9	-4.63374	-24.8253	0.000169676	0.0333497
BCL2	BCL2, apoptosis regulator	-4.64989	-25.1047	3.69205e-05	0.0125345
ANKIB1	ankyrin repeat and IBR domain containing 1	-4.66536	-25.3755	9.95909e-05	0.0237372
ABHD2	abhydrolase domain containing 2	-4.67078	-25.4709	0.000101055	0.0238412
RBM39	RNA binding motif protein 39	-4.67315	-25.5128	9.52586e-05	0.0231002
FAM20A	FAM20A, golgi associated secretory pathway pseudokinase	-4.67375	-25.5234	0.000254965	0.0428792
ZFPL1	zinc finger protein like 1	-4.67904	-25.6172	0.000185481	0.0352462
ESCO1	establishment of sister chromatid cohesion N-acetyltransferase 1	-4.68282	-25.6844	0.000198643	0.0369655
VTCN1	V-set domain containing T cell activation inhibitor 1	-4.68499	-25.723	1.41692e-05	0.00646649
MFSD5	major facilitator superfamily domain containing 5	-4.68704	-25.7597	2.47732e-05	0.00926963
EBP	EBP, cholestenol delta-isomerase	-4.69339	-25.8732	0.000255375	0.0428792
VPS4A	vacuolar protein sorting 4 homolog A	-4.69408	-25.8857	5.55936e-05	0.0163948
ASTE1	asteroid homolog 1	-4.69942	-25.9816	3.08264e-05	0.011059
RPS6KA4	ribosomal protein S6 kinase A4	-4.70182	-26.0249	2.6777e-05	0.00986037
TMEM127	transmembrane protein 127	-4.71333	-26.2334	2.2428e-05	0.00867183
MRPS34	mitochondrial ribosomal protein S34	-4.73359	-26.6044	6.93327e-05	0.0190871
PAK1	p21 (RAC1) activated kinase 1	-4.73787	-26.6834	0.000184761	0.0351816
FIGNL1	fidgetin like 1	-4.74067	-26.7353	0.000166641	0.0329503
CCHCR1	coiled-coil alpha-helical rod protein 1	-4.76074	-27.1098	5.45871e-05	0.0161665
CABLES1	Cdk5 and Abl enzyme substrate 1	-4.77115	-27.3061	9.89023e-06	0.00519498
CISH	cytokine inducible SH2 containing protein	-4.77382	-27.3566	7.15729e-06	0.00435048
CUL1	cullin 1	-4.79146	-27.6932	8.21007e-05	0.0212417
SAR1B	secretion associated Ras related GTPase 1B	-4.79263	-27.7157	5.97258e-05	0.017261
ANAPC11	anaphase promoting complex subunit 11	-4.79357	-27.7338	8.37089e-05	0.0215376
ZNF239	zinc finger protein 239	-4.80489	-27.9522	2.64008e-05	0.00977358
GPR182	G protein-coupled receptor 182	-4.81041	-28.0594	5.74101e-05	0.0168236
DAAM1	dishevelled associated activator of morphogenesis 1	-4.81437	-28.1365	0.000230391	0.040288
GTF2H5	general transcription factor IIH subunit 5	-4.82002	-28.2468	6.32869e-05	0.0178686
ZNF227	zinc finger protein 227	-4.82288	-28.3029	2.04096e-05	0.00823452
TRAPPC6B	trafficking protein particle complex 6B	-4.82368	-28.3186	0.000329064	0.0498954
WISP1	WNT1 inducible signaling pathway protein 1	-4.83421	-28.5261	2.01974e-05	0.00817262
ARL4D	ADP ribosylation factor like GTPase 4D	-4.83507	-28.543	1.48216e-05	0.00664801
FEZ2	fasciculation and elongation protein zeta 2	-4.84782	-28.7965	0.000137995	0.0293597
CNPY2	canopy FGF signaling regulator 2	-4.84823	-28.8046	0.000137642	0.0293597
HNRNPR	heterogeneous nuclear ribonucleoprotein R	-4.84954	-28.8308	8.72017e-05	0.0220251
PGBD3	piggyBac transposable element derived 3	-4.85977	-29.0361	1.59783e-06	0.00159341
PLAGL2	PLAG1 like zinc finger 2	-4.86278	-29.0967	0.00014778	0.0307225
COPB2	coatomer protein complex subunit beta 2	-4.86775	-29.197	0.000275556	0.0446707
NLRC3	NLR family CARD domain containing 3	-4.88776	-29.6048	6.56559e-05	0.018281
DOPEY2	Protein dopey-2	-4.89364	-29.7258	5.16225e-06	0.00352235
TOMM40	translocase of outer mitochondrial membrane 40	-4.89534	-29.7607	0.000160725	0.032417
RPA1	replication protein A1	-4.91659	-30.2025	7.92936e-06	0.00454209
TSPAN15	tetraspanin 15	-4.9213	-30.3011	9.33121e-05	0.0227266
PPID	peptidylprolyl isomerase D	-4.92975	-30.4791	0.000323267	0.0494474
CDC26	cell division cycle 26	-4.93263	-30.5401	4.8182e-05	0.0150712
FAM208A	family with sequence similarity 208 member A	-4.94416	-30.7851	0.000148425	0.0307441
ZNF236	zinc finger protein 236	-4.9512	-30.9356	0.000181059	0.0348101
VPS41	VPS41, HOPS complex subunit	-4.95448	-31.0062	3.91885e-05	0.0129987
RHOC	ras homolog family member C	-4.9626	-31.181	1.01136e-06	0.00121359
GPATCH2L	G-patch domain containing 2 like	-4.96612	-31.2572	0.000114433	0.0258579
CALCB	calcitonin related polypeptide beta	-4.9689	-31.3176	0.000126154	0.0275668
MFAP3L	microfibril associated protein 3 like	-4.98623	-31.696	7.27804e-05	0.0194447
HSH2D	hematopoietic SH2 domain containing	-4.98781	-31.7308	5.11571e-05	0.0156335
ALDH3A1	aldehyde dehydrogenase 3 family member A1	-4.99903	-31.9785	9.33916e-05	0.0227266
SNRPA1	small nuclear ribonucleoprotein polypeptide A'	-5.00126	-32.028	4.97733e-05	0.0154313
RPRD1A	regulation of nuclear pre-mRNA domain containing 1A	-5.0119	-32.2651	0.00029585	0.0469566
ACTA1	actin, alpha 1, skeletal muscle	-5.04293	-32.9665	3.60586e-05	0.0122718
NUP58	nucleoporin 58	-5.04944	-33.1157	7.19499e-05	0.019409
ASB5	ankyrin repeat and SOCS box containing 5	-5.05258	-33.1878	6.93853e-05	0.0190871
SERPINE1	serpin family E member 1	-5.05707	-33.2913	1.29736e-05	0.0061477
GRB10	growth factor receptor bound protein 10	-5.05939	-33.3448	0.000319095	0.0490247
SUN2	Sad1 and UNC84 domain containing 2	-5.05971	-33.3522	7.20699e-06	0.00436164
KCTD5	potassium channel tetramerization domain containing 5	-5.06043	-33.3688	0.000105176	0.0243156
LYSMD1	LysM domain containing 1	-5.06155	-33.3947	9.32897e-05	0.0227266
BCL2L1	BCL2 like 1	-5.06189	-33.4026	1.93917e-05	0.00793891
BRD3	bromodomain containing 3	-5.09594	-34.2004	0.000271191	0.0443057
MUL1	mitochondrial E3 ubiquitin protein ligase 1	-5.10445	-34.4026	7.1235e-07	0.000953419
ANP32B	acidic nuclear phosphoprotein 32 family member B	-5.11813	-34.7304	0.000159028	0.0322176
CNOT2	CCR4-NOT transcription complex subunit 2	-5.12668	-34.937	1.62711e-06	0.00159497
CGAS	cyclic GMP-AMP synthase	-5.13393	-35.113	5.42023e-05	0.0161469
CWC15	CWC15 spliceosome associated protein homolog	-5.13777	-35.2066	4.06434e-06	0.00310844
RBCK1	RANBP2-type and C3HC4-type zinc finger containing 1	-5.13871	-35.2294	0.000100226	0.0237666
PFN2	profilin 2	-5.14053	-35.274	5.90261e-05	0.017117
ACADS	acyl-CoA dehydrogenase short chain	-5.14186	-35.3065	1.11932e-05	0.00560443
DGAT1	diacylglycerol O-acyltransferase 1	-5.15055	-35.5199	0.000303684	0.0476582
MTMR10	myotubularin related protein 10	-5.16777	-35.9464	8.5933e-06	0.00470923
BABAM1	BRISC and BRCA1 A complex member 1	-5.17835	-36.2108	1.11837e-06	0.00128654
ORMDL3	ORMDL sphingolipid biosynthesis regulator 3	-5.18581	-36.3986	1.11926e-05	0.00560443
HSCB	HscB mitochondrial iron-sulfur cluster cochaperone	-5.19555	-36.6452	6.46487e-05	0.0181427
RALGAPA2	Ral GTPase activating protein catalytic alpha subunit 2	-5.22912	-37.5079	3.44012e-05	0.0118527
TSKU	tsukushi, small leucine rich proteoglycan	-5.23093	-37.5549	0.000275106	0.0446707
PTBP1	polypyrimidine tract binding protein 1	-5.24032	-37.8001	4.99983e-05	0.0154313
PDAP1	PDGFA associated protein 1	-5.24153	-37.8318	5.53865e-06	0.0036712
TADA3	transcriptional adaptor 3	-5.24567	-37.9405	1.30099e-05	0.0061477
CFAP45	cilia and flagella associated protein 45	-5.25002	-38.0551	8.84238e-05	0.0220972
DIRC2	disrupted in renal carcinoma 2	-5.25209	-38.1097	2.90774e-05	0.0105402
KHDC4	KH domain containing 4, pre-mRNA splicing factor	-5.2553	-38.1946	4.44006e-05	0.0142084
KANSL3	KAT8 regulatory NSL complex subunit 3	-5.25886	-38.2891	1.89683e-05	0.00790505
COA7	cytochrome c oxidase assembly factor 7 (putative)	-5.26738	-38.5158	2.86759e-05	0.0104491
PSMG2	proteasome assembly chaperone 2	-5.28274	-38.9281	2.03909e-07	0.000483372
EWSR1	EWS RNA binding protein 1	-5.29273	-39.1986	6.56011e-05	0.018281
GRHPR	glyoxylate and hydroxypyruvate reductase	-5.29615	-39.2917	2.54178e-06	0.00221127
RAB2A	RAB2A, member RAS oncogene family	-5.30104	-39.425	0.000137797	0.0293597
PAIP2	poly(A) binding protein interacting protein 2	-5.30948	-39.6564	1.75742e-05	0.00743536
GOSR1	golgi SNAP receptor complex member 1	-5.31064	-39.6882	6.2961e-05	0.0178504
ZNF846	zinc finger protein 846	-5.32727	-40.1484	6.5785e-06	0.00413114
CHCHD4	coiled-coil-helix-coiled-coil-helix domain containing 4	-5.33612	-40.3954	8.82608e-06	0.00479
AADAT	aminoadipate aminotransferase	-5.34308	-40.5907	8.31057e-05	0.021422
RPS15A	ribosomal protein S15a	-5.35817	-41.0176	2.14669e-06	0.00197881
CXCL13	C-X-C motif chemokine ligand 13	-5.3614	-41.1095	0.00014456	0.0304255
ZNF384	zinc finger protein 384	-5.36402	-41.1842	8.75635e-05	0.0220251
YAP1	Yes associated protein 1	-5.37167	-41.4031	6.53987e-05	0.018281
CIPC	CLOCK interacting pacemaker	-5.38109	-41.6744	6.30559e-05	0.0178504
FAM13B	family with sequence similarity 13 member B	-5.38865	-41.8932	4.52382e-05	0.0143438
MRPS18A	mitochondrial ribosomal protein S18A	-5.39407	-42.0509	6.19472e-05	0.0177423
ZSCAN2	zinc finger and SCAN domain containing 2	-5.39959	-42.2123	9.25772e-05	0.0227266
PHOSPHO1	phosphoethanolamine/phosphocholine phosphatase	-5.40471	-42.3623	1.93532e-05	0.00793891
IFT20	intraflagellar transport 20	-5.43004	-43.1125	3.13419e-05	0.0111576
FTH1	ferritin heavy chain 1	-5.43295	-43.1997	0.000215353	0.0387789
RNF139	ring finger protein 139	-5.4341	-43.2342	0.000196021	0.0366634
BMF	Bcl2 modifying factor	-5.43733	-43.3312	1.18934e-06	0.00133509
MARCH2	membrane associated ring-CH-type finger 2	-5.44154	-43.4578	1.1299e-05	0.00563249
TBC1D31	TBC1 domain family member 31	-5.46867	-44.2826	0.00019288	0.03633
YTHDF1	YTH N6-methyladenosine RNA binding protein 1	-5.4714	-44.3665	6.98626e-05	0.0191399
HSBP1	heat shock factor binding protein 1	-5.47345	-44.4296	1.47273e-05	0.00663417
EIF4E	eukaryotic translation initiation factor 4E	-5.48695	-44.8474	7.81713e-07	0.00101692
GGA3	golgi associated, gamma adaptin ear containing, ARF binding protein 3	-5.48904	-44.9124	5.05562e-05	0.015569
TPBGL	trophoblast glycoprotein like	-5.4915	-44.9891	7.72971e-05	0.0203391
WNK4	WNK lysine deficient protein kinase 4	-5.49909	-45.2264	8.44766e-06	0.00468475
HCCS	holocytochrome c synthase	-5.51346	-45.6789	1.11043e-07	0.000330625
NOL6	nucleolar protein 6	-5.52267	-45.9715	3.76274e-05	0.0127434
NKX6-2	NK6 homeobox 2	-5.52835	-46.1528	9.11411e-05	0.0225335
CLPP	caseinolytic mitochondrial matrix peptidase proteolytic subunit	-5.52955	-46.1913	4.18087e-05	0.013629
POP5	POP5 homolog, ribonuclease P/MRP subunit	-5.53145	-46.2523	1.93501e-05	0.00793891
MRPL41	mitochondrial ribosomal protein L41	-5.55647	-47.0613	1.45618e-05	0.00660165
GADD45B	growth arrest and DNA damage inducible beta	-5.56553	-47.3578	1.11332e-06	0.00128654
SVIL	supervillin	-5.56714	-47.4106	3.0906e-05	0.011059
SH3PXD2B	SH3 and PX domains 2B	-5.57504	-47.6711	3.7948e-05	0.0127898
CD40	CD40 molecule	-5.57601	-47.703	6.26401e-06	0.00401097
UBE2G1	ubiquitin conjugating enzyme E2 G1	-5.58216	-47.907	7.55152e-05	0.0200216
POU6F1	POU class 6 homeobox 1	-5.5937	-48.2916	3.59463e-05	0.0122636
ZNF853	zinc finger protein 853	-5.60793	-48.7702	1.13301e-05	0.00563249
TAAR13c	Trace amine-associated receptor 13c	-5.61152	-48.8919	5.10172e-05	0.0156335
SAP30BP	SAP30 binding protein	-5.614	-48.976	4.83843e-05	0.0151006
NUCL2	#N/A	-5.62075	-49.2056	1.49174e-05	0.00665523
LYRM9	LYR motif containing 9	-5.63562	-49.7153	8.54601e-05	0.0218891
ARID1B	AT-rich interaction domain 1B	-5.637	-49.7631	4.15214e-07	0.000674762
MYCBP	MYC binding protein	-5.6529	-50.3143	6.07727e-06	0.0039353
NDUFB11	NADH:ubiquinone oxidoreductase subunit B11	-5.66775	-50.8349	7.11928e-06	0.00434635
PSMC4	proteasome 26S subunit, ATPase 4	-5.67957	-51.2534	2.24184e-05	0.00867183
NPPC	natriuretic peptide C	-5.69824	-51.9206	3.2081e-05	0.0113338
GGCX	gamma-glutamyl carboxylase	-5.70802	-52.2738	2.13077e-05	0.00847407
TRUB1	TruB pseudouridine synthase family member 1	-5.7101	-52.3493	1.10019e-05	0.00556876
CTHRC1	collagen triple helix repeat containing 1	-5.72247	-52.8003	1.85444e-05	0.00779846
ATF5	activating transcription factor 5	-5.73775	-53.3623	4.44027e-05	0.0142084
SF3A1	splicing factor 3a subunit 1	-5.74055	-53.4661	4.73592e-06	0.00332938
WTAP	WT1 associated protein	-5.74875	-53.7707	1.5999e-05	0.00696535
IER5	immediate early response 5	-5.78706	-55.2178	6.24134e-05	0.0178025
TVP23B	trans-golgi network vesicle protein 23 homolog B	-5.78814	-55.2591	4.82821e-06	0.00336031
ATG12	autophagy related 12	-5.8118	-56.1729	0.000121369	0.0269013
GFI1B	growth factor independent 1B transcriptional repressor	-5.83906	-57.2443	1.35349e-05	0.00630099
STAG2	stromal antigen 2	-5.84556	-57.503	8.87834e-06	0.00479
CELF1	CUGBP Elav-like family member 1	-5.85591	-57.9169	5.65372e-05	0.0166378
SRP19	signal recognition particle 19	-5.85768	-57.9879	1.03563e-05	0.0053511
SEC31A	SEC31 homolog A, COPII coat complex component	-5.86363	-58.2277	5.07129e-05	0.0155828
PTH2R	parathyroid hormone 2 receptor	-5.8871	-59.1827	6.0818e-06	0.0039353
TRAPPC4	trafficking protein particle complex 4	-5.89031	-59.3144	3.3944e-07	0.000659648
SNX12	sorting nexin 12	-5.89217	-59.3907	3.87394e-07	0.000665721
ISL2	ISL LIM homeobox 2	-5.91071	-60.1591	5.45446e-05	0.0161665
ACTR6	ARP6 actin related protein 6 homolog	-5.92542	-60.7758	1.99163e-05	0.00809292
ZNF37A	zinc finger protein 37A	-5.9271	-60.8462	8.95829e-09	5.93785e-05
HASPIN	histone H3 associated protein kinase	-5.93575	-61.2124	3.76224e-07	0.000662892
CTU2	cytosolic thiouridylase subunit 2	-5.93747	-61.2854	7.71041e-06	0.00449059
IGBP1	immunoglobulin binding protein 1	-5.94597	-61.6474	4.37077e-07	0.000691351
GPBP1L1	GC-rich promoter binding protein 1 like 1	-5.94633	-61.6628	5.06447e-06	0.00347265
NSMCE1	NSE1 homolog, SMC5-SMC6 complex component	-5.94893	-61.7741	7.12595e-05	0.0192976
SCP2	sterol carrier protein 2	-5.94936	-61.7927	1.72314e-05	0.00735745
OGFOD1	2-oxoglutarate and iron dependent oxygenase domain containing 1	-5.95993	-62.2469	4.45538e-05	0.014224
MRPL28	mitochondrial ribosomal protein L28	-5.98309	-63.254	8.17749e-06	0.00464598
RAP1A	RAP1A, member of RAS oncogene family	-5.98322	-63.2598	6.90971e-06	0.00425574
FAM213A	family with sequence similarity 213 member A	-6.00218	-64.0968	0.000316576	0.0486974
CCDC61	coiled-coil domain containing 61	-6.00588	-64.2615	0.000181623	0.034834
ANXA11	annexin A11	-6.02559	-65.1455	1.6513e-06	0.00160736
EIF4H	eukaryotic translation initiation factor 4H	-6.05111	-66.308	2.37092e-06	0.00208873
JOSD1	Josephin domain containing 1	-6.05896	-66.6695	2.80619e-06	0.00236732
COPZ1	coatomer protein complex subunit zeta 1	-6.07482	-67.4066	4.99984e-06	0.00344531
C12orf65	chromosome 12 open reading frame 65	-6.07802	-67.5564	4.56905e-06	0.00324484
IRF4	interferon regulatory factor 4	-6.11113	-69.1249	2.3138e-06	0.00206129
MPV17	MPV17, mitochondrial inner membrane protein	-6.11229	-69.1802	0.000279788	0.0451798
POLR2J	RNA polymerase II subunit J	-6.1331	-70.1857	1.26913e-06	0.00139099
DIAPH1	diaphanous related formin 1	-6.14303	-70.6704	2.20504e-06	0.00199305
USP7	ubiquitin specific peptidase 7	-6.19614	-73.3202	1.14946e-05	0.00567373
RAB3A	RAB3A, member RAS oncogene family	-6.19718	-73.3732	0.000199215	0.0370223
PFDN4	prefoldin subunit 4	-6.19993	-73.5131	3.81615e-07	0.000663987
UBAC1	UBA domain containing 1	-6.20552	-73.7987	4.5598e-07	0.000713147
NAA20	N(alpha)-acetyltransferase 20, NatB catalytic subunit	-6.22403	-74.7513	1.36506e-07	0.000372569
CD99	CD99 molecule (Xg blood group)	-6.23204	-75.1678	7.45128e-06	0.00444485
NOP16	NOP16 nucleolar protein	-6.26198	-76.744	9.51305e-06	0.00501579
MGAT1	mannosyl (alpha-1,3-)-glycoprotein beta-1,2-N-acetylglucosaminyltransferase	-6.28584	-78.0234	1.73957e-05	0.00740489
ZNF174	zinc finger protein 174	-6.31163	-79.431	7.65271e-06	0.00447571
GLRK	Glutamate receptor U1	-6.33166	-80.5416	1.5459e-05	0.00678807
TMED7	transmembrane p24 trafficking protein 7	-6.33288	-80.6097	8.57182e-06	0.00470923
UBALD1	UBA like domain containing 1	-6.34303	-81.1786	1.23905e-05	0.00600939
RYK	receptor-like tyrosine kinase	-6.37093	-82.7637	3.59189e-08	0.000156242
PSMD9	proteasome 26S subunit, non-ATPase 9	-6.37192	-82.821	1.41169e-06	0.00146642
TXNDC9	thioredoxin domain containing 9	-6.38008	-83.2903	3.44828e-07	0.000659648
CTRB2	chymotrypsinogen B2	-6.38082	-83.333	3.41727e-05	0.0118031
RAB5C	RAB5C, member RAS oncogene family	-6.38881	-83.7963	1.90622e-05	0.00792047
DYNC1I2	dynein cytoplasmic 1 intermediate chain 2	-6.38915	-83.8155	1.1074e-05	0.00558493
ATP5PF	ATP synthase peripheral stalk subunit F6	-6.40315	-84.633	1.14764e-06	0.0013094
SLC18B1	solute carrier family 18 member B1	-6.40673	-84.8435	1.34774e-06	0.00143205
HSPB11	heat shock protein family B (small) member 11	-6.4166	-85.4255	1.7831e-07	0.000456321
MT1F	metallothionein 1F	-6.42065	-85.6661	4.27453e-06	0.0032104
PI4KB	phosphatidylinositol 4-kinase beta	-6.44968	-87.407	3.14721e-05	0.0111754
MIF	macrophage migration inhibitory factor	-6.48259	-89.4242	6.07043e-05	0.0174943
PDIA3	protein disulfide isomerase family A member 3	-6.4918	-89.9967	4.14165e-05	0.0135328
ARFIP1	ADP ribosylation factor interacting protein 1	-6.49375	-90.1182	5.7911e-07	0.000810811
MRPL49	mitochondrial ribosomal protein L49	-6.50817	-91.0237	3.84127e-06	0.00299825
AKTIP	AKT interacting protein	-6.51231	-91.2852	2.88194e-08	0.000133361
TIMM44	translocase of inner mitochondrial membrane 44	-6.524	-92.0278	1.12145e-08	6.78695e-05
CSGA	#N/A	-6.5341	-92.6744	3.38877e-06	0.00271879
IGSF21	immunoglobin superfamily member 21	-6.54501	-93.3778	3.11069e-05	0.0111024
COX7A2	cytochrome c oxidase subunit 7A2	-6.58646	-96.0995	9.99594e-07	0.00121359
ERAP2	endoplasmic reticulum aminopeptidase 2	-6.58953	-96.3042	5.33271e-05	0.0160668
ZNF74	zinc finger protein 74	-6.62828	-98.9263	4.82457e-06	0.00336031
FZR1	fizzy and cell division cycle 20 related 1	-6.63625	-99.4742	4.45744e-06	0.0032104
ABCD3	ATP binding cassette subfamily D member 3	-6.64345	-99.972	1.37738e-06	0.00145236
JUND	JunD proto-oncogene, AP-1 transcription factor subunit	-6.65975	-101.108	4.99972e-08	0.000198017
SYCP3	synaptonemal complex protein 3	-6.70219	-104.126	3.30811e-07	0.000657818
MBD6	methyl-CpG binding domain protein 6	-6.70946	-104.652	1.00367e-05	0.00525209
ZFAND1	zinc finger AN1-type containing 1	-6.71199	-104.836	8.86252e-06	0.00479
CATSPER1	cation channel sperm associated 1	-6.72225	-105.584	3.16817e-06	0.00260943
GMPPA	GDP-mannose pyrophosphorylase A	-6.74125	-106.984	1.46015e-06	0.0015045
HSF1	heat shock transcription factor 1	-6.75194	-107.78	3.66153e-07	0.000662892
GPS2	G protein pathway suppressor 2	-6.7543	-107.956	2.46438e-05	0.00924609
PHF1	PHD finger protein 1	-6.81696	-112.748	1.11637e-07	0.000330625
FBXL8	F-box and leucine rich repeat protein 8	-6.84222	-114.74	4.98665e-05	0.0154313
PRDM12	PR/SET domain 12	-6.84976	-115.341	1.76392e-06	0.00168629
ESRP2	epithelial splicing regulatory protein 2	-6.87846	-117.659	8.2791e-06	0.00467699
ZC4H2	zinc finger C4H2-type containing	-6.9375	-122.574	4.7502e-05	0.014892
TEDC2	tubulin epsilon and delta complex 2	-6.96819	-125.209	3.79636e-08	0.000160132
ATPAF1	ATP synthase mitochondrial F1 complex assembly factor 1	-6.97808	-126.07	2.19625e-06	0.00199305
GCA	grancalcin	-6.9981	-127.832	4.31769e-06	0.0032104
BAX	BCL2 associated X, apoptosis regulator	-7.00569	-128.506	5.28369e-08	0.000198017
SLC35D1	solute carrier family 35 member D1	-7.01583	-129.412	5.88325e-07	0.000810811
ZNF629	zinc finger protein 629	-7.02158	-129.929	3.64549e-09	3.90333e-05
DHX15	DEAH-box helicase 15	-7.05271	-132.763	1.46076e-05	0.00660165
PKN2	protein kinase N2	-7.06657	-134.045	1.51971e-05	0.00670522
UBE2A	ubiquitin conjugating enzyme E2 A	-7.16789	-143.797	2.66847e-05	0.00985247
CCDC166	coiled-coil domain containing 166	-7.17792	-144.8	1.29592e-05	0.0061477
DCAF6	DDB1 and CUL4 associated factor 6	-7.19192	-146.212	4.93737e-07	0.000738987
POLR2K	RNA polymerase II subunit K	-7.20764	-147.814	1.60129e-05	0.00696535
PLEKHA1	pleckstrin homology domain containing A1	-7.29851	-157.424	2.17701e-05	0.00858438
PPP4R2	protein phosphatase 4 regulatory subunit 2	-7.3679	-165.18	4.99544e-07	0.000739723
ZNF513	zinc finger protein 513	-7.37491	-165.985	1.86862e-07	0.000456321
SENP1	SUMO specific peptidase 1	-7.46262	-176.389	6.10673e-06	0.0039353
MRPL40	mitochondrial ribosomal protein L40	-7.51575	-183.006	3.02936e-06	0.00252498
OSGIN1	oxidative stress induced growth inhibitor 1	-7.55361	-187.872	7.03777e-07	0.00095109
LGALS9	galectin 9	-7.5726	-190.361	1.29465e-07	0.000367773
SRRM1	serine and arginine repetitive matrix 1	-7.6253	-197.444	5.17478e-09	4.5019e-05
CALM3	calmodulin 3	-7.63771	-199.15	1.61543e-06	0.00159475
COA3	cytochrome c oxidase assembly factor 3	-7.67346	-204.146	7.90089e-06	0.00454209
ZMAT2	zinc finger matrin-type 2	-7.67387	-204.204	1.25959e-06	0.00139099
TLK1	tousled like kinase 1	-7.76983	-218.249	2.97007e-08	0.000133361
TDG	thymine DNA glycosylase	-7.77309	-218.743	1.03933e-08	6.57589e-05
ST3GAL3	ST3 beta-galactoside alpha-2,3-sialyltransferase 3	-7.79437	-221.993	3.22075e-07	0.000654473
SLC16A6	solute carrier family 16 member 6	-7.80393	-223.469	1.17176e-09	1.81225e-05
MRPL35	mitochondrial ribosomal protein L35	-7.84745	-230.313	1.04868e-06	0.00123704
TFE3	transcription factor binding to IGHM enhancer 3	-7.89627	-238.24	1.87037e-08	0.000100133
SEC11A	SEC11 homolog A, signal peptidase complex subunit	-7.96718	-250.243	5.67126e-07	0.000805521
RALB	RAS like proto-oncogene B	-7.99055	-254.328	7.03451e-08	0.000251069
TAL1	TAL bHLH transcription factor 1, erythroid differentiation factor	-8.04887	-264.821	2.67661e-07	0.000565341
MRPL22	mitochondrial ribosomal protein L22	-8.09644	-273.698	9.34949e-10	1.62675e-05
CDK12	cyclin dependent kinase 12	-8.34809	-325.855	4.02309e-09	3.97264e-05
LIN37	lin-37 DREAM MuvB core complex component	-8.43748	-346.685	4.82805e-07	0.000732384
ATP5MC3	ATP synthase membrane subunit c locus 3	-8.53664	-371.35	7.85388e-10	1.56174e-05
ANXA4	annexin A4	-8.56838	-379.611	7.97949e-11	1.85118e-06
DEXI	Dexi homolog	-8.84914	-461.166	2.68059e-07	0.000565341
B3GNT2	UDP-GlcNAc:betaGal beta-1,3-N-acetylglucosaminyltransferase 2	-9.06784	-536.65	5.78312e-09	4.61882e-05
ZNF436	zinc finger protein 436	-9.11787	-555.587	3.45949e-07	0.000659648
NR1D1	nuclear receptor subfamily 1 group D member 1	-9.55218	-750.746	4.28102e-09	3.97264e-05
PRELID3B	PRELI domain containing 3B	-10.9335	-1955.68	0.000245234	0.041793
ZFAND5	zinc finger AN1-type containing 5	-11.1172	-2221.27	0.000195203	0.036608
SMAD1	SMAD family member 1	-11.1321	-2244.4	0.000274936	0.0446707
SEC22A	SEC22 homolog A, vesicle trafficking protein	-11.1991	-2351.14	0.000259559	0.0432557
ZNF511	zinc finger protein 511	-11.2166	-2379.69	0.00024146	0.0416092
CTDSPL2	CTD small phosphatase like 2	-11.5457	-2989.53	0.000282118	0.045373
ACLY	ATP citrate lyase	-11.5878	-3077.98	0.000275296	0.0446707
NEMP1	nuclear envelope integral membrane protein 1	-11.6005	-3105.3	0.000293542	0.0468496
TRIM44	tripartite motif containing 44	-11.6571	-3229.62	0.000262253	0.0434059
UBE4B	ubiquitination factor E4B	-11.7918	-3545.53	0.000228992	0.040288
HIRIP3	HIRA interacting protein 3	-11.9073	-3840.99	0.000214927	0.0387522
SETD6	SET domain containing 6	-12.1908	-4675.08	6.40001e-05	0.017997
RNF121	ring finger protein 121	-12.2257	-4789.54	5.82653e-05	0.0170007
CDC34	cell division cycle 34	-12.2708	-4941.8	0.000148664	0.0307478
IMPG2	interphotoreceptor matrix proteoglycan 2	-12.3049	-5059.88	5.4289e-05	0.0161469
SRI	sorcin	-12.572	-6088.88	3.90875e-05	0.0129987
ZBTB18	zinc finger and BTB domain containing 18	-13.6449	-12809.5	8.44315e-06	0.00468475
PRKAR1A	protein kinase cAMP-dependent type I regulatory subunit alpha	-14.2706	-19764.4	3.2355e-06	0.00263371
GTF2IRD1	GTF2I repeat domain containing 1	-14.4446	-22297.3	3.00113e-06	0.00251652

## Sheet: RNAseq 72h FDR<0,05
Gene Name	Gene description	Log₂ fold change	Fold change	P-value	FDR p-value
ARID5A	AT-rich interaction domain 5A	11.738	3415.69	5.46426e-05	0.0178964
PPP1R9B	protein phosphatase 1 regulatory subunit 9B	10.1351	1124.54	0.000174114	0.0384086
ORAI2	ORAI calcium release-activated calcium modulator 2	7.36305	164.627	1.07314e-10	5.74522e-07
SLC2A8	solute carrier family 2 member 8	6.65444	100.737	1.3346e-10	6.88038e-07
SLC5A3	solute carrier family 5 member 3	5.58866	48.1232	3.96835e-07	0.000506765
ANO1	anoctamin 1	5.1832	36.3328	0	0
TNNT1	troponin T1, slow skeletal type	4.95148	30.9417	3.34254e-05	0.01296
HNRNPM	heterogeneous nuclear ribonucleoprotein M	4.95144	30.9407	3.21552e-05	0.0125726
ANGEL2	angel homolog 2	4.83958	28.6326	4.55335e-09	1.44046e-05
MAP2	microtubule associated protein 2	4.46263	22.0489	6.08838e-05	0.0194374
PPAT	phosphoribosyl pyrophosphate amidotransferase	4.43779	21.6725	5.95691e-05	0.0191495
ARHGAP12	Rho GTPase activating protein 12	4.4044	21.1767	5.5389e-13	6.4249e-09
FEZ2	fasciculation and elongation protein zeta 2	4.38139	20.8416	2.9372e-07	0.000393119
HEMGN	hemogen	4.33007	20.1131	7.20528e-05	0.0217961
TNK2	tyrosine kinase non receptor 2	4.32807	20.0853	2.49082e-08	5.50333e-05
AAMDC	adipogenesis associated Mth938 domain containing	4.20028	18.3827	0.000217079	0.0446141
PTGR1	prostaglandin reductase 1	4.1432	17.6696	0.000254901	0.0499161
SIK2	salt inducible kinase 2	4.09278	17.0627	5.07109e-05	0.0170441
RHBDL2	rhomboid like 2	4.04625	16.5212	6.79105e-05	0.0210062
TMEM71	transmembrane protein 71	3.95402	15.4981	7.9607e-07	0.00089448
NFYA	nuclear transcription factor Y subunit alpha	3.86738	14.5948	1.64562e-05	0.00783033
LGI1	leucine rich glioma inactivated 1	3.8423	14.3432	5.37334e-09	1.60164e-05
UIMC1	ubiquitin interaction motif containing 1	3.83514	14.2722	7.80055e-05	0.0228589
C18orf25	chromosome 18 open reading frame 25	3.68708	12.8802	1.84098e-07	0.000280809
RPS6KA1	ribosomal protein S6 kinase A1	3.58834	12.0282	3.24319e-09	1.10106e-05
DLX3	distal-less homeobox 3	3.55243	11.7324	1.01351e-06	0.00103145
PLD5	phospholipase D family member 5	3.49324	11.2608	3.18284e-08	6.42079e-05
SLC25A38	solute carrier family 25 member 38	3.46416	11.0361	0.000132764	0.0319173
CLTB	clathrin light chain B	3.45935	10.9993	4.57241e-08	8.83967e-05
SKIV2L	Ski2 like RNA helicase	3.45243	10.9467	0.000231587	0.046297
FAM114A2	family with sequence similarity 114 member A2	3.44988	10.9274	5.30444e-05	0.017538
PMEPA1	prostate transmembrane protein, androgen induced 1	3.4486	10.9177	1.86063e-07	0.000280809
CXXC1	CXXC finger protein 1	3.41581	10.6724	9.6721e-05	0.0263982
TMEM107	transmembrane protein 107	3.40427	10.5873	1.47775e-06	0.00131856
VDAC2	voltage dependent anion channel 2	3.40117	10.5646	9.41377e-05	0.0261107
NT5C3A	5'-nucleotidase, cytosolic IIIA	3.39286	10.5039	4.55609e-06	0.00303438
AP3S1	adaptor related protein complex 3 subunit sigma 1	3.2415	9.45776	5.85439e-05	0.0189072
ZNF335	zinc finger protein 335	3.16694	8.98139	1.96852e-05	0.00895451
IFNGR1	interferon gamma receptor 1	3.14425	8.84125	3.07175e-05	0.0122865
TOMM34	translocase of outer mitochondrial membrane 34	3.08029	8.45782	7.73466e-08	0.000134578
C19orf47	chromosome 19 open reading frame 47	3.06414	8.36369	1.25087e-05	0.00652113
EVA1B	eva-1 homolog B	3.02127	8.1188	5.50168e-08	0.000100764
RNF41	ring finger protein 41	2.97762	7.87686	2.82353e-05	0.0115255
CRAT	carnitine O-acetyltransferase	2.97125	7.84217	0.00011206	0.0288321
POLDIP2	DNA polymerase delta interacting protein 2	2.90434	7.48676	9.16292e-07	0.000981102
ELMO1	engulfment and cell motility 1	2.90318	7.48072	0.000115375	0.0293058
CCNYL1	cyclin Y like 1	2.85051	7.21256	0.000230833	0.0462314
TCHH	trichohyalin	2.82307	7.07666	2.17954e-06	0.00179516
UNC5B	unc-5 netrin receptor B	2.75892	6.76887	5.19073e-09	1.60164e-05
PHC1	polyhomeotic homolog 1	2.70282	6.51073	6.40599e-14	9.90757e-10
TGIF2	TGFB induced factor homeobox 2	2.68638	6.43696	6.13176e-13	6.56547e-09
UNG	uracil DNA glycosylase	2.66537	6.34392	0.000114453	0.0292318
CXorf38	chromosome X open reading frame 38	2.60694	6.09211	7.70339e-05	0.0226218
MUC17	mucin 17, cell surface associated	2.59869	6.05737	6.90868e-06	0.0041811
KCNIP4	potassium voltage-gated channel interacting protein 4	2.56251	5.90736	0.000116923	0.0294305
ZMYND8	zinc finger MYND-type containing 8	2.52533	5.75707	1.16289e-05	0.00619398
MYOM2	myomesin 2	2.52045	5.7376	3.34766e-06	0.00243968
HES1	hes family bHLH transcription factor 1	2.50479	5.67566	1.49233e-05	0.00738197
VRK3	vaccinia related kinase 3	2.48514	5.59888	0.000131985	0.0318079
GJA10	gap junction protein alpha 10	2.44224	5.43485	6.72687e-05	0.0208541
MICAL2	microtubule associated monooxygenase, calponin and LIM domain containing 2	2.34243	5.07156	4.95027e-05	0.0166854
GRIN1	glutamate ionotropic receptor NMDA type subunit 1	2.3342	5.04271	3.96264e-08	7.76874e-05
C8orf33	chromosome 8 open reading frame 33	2.31501	4.97609	2.63408e-05	0.0109388
OLFM1	olfactomedin 1	2.26263	4.79866	8.08299e-05	0.0233426
TCOF1	treacle ribosome biogenesis factor 1	2.25292	4.76646	9.10537e-06	0.00515212
PTPRE	protein tyrosine phosphatase, receptor type E	2.23345	4.70257	0.00019752	0.0419113
CANT1	calcium activated nucleotidase 1	2.22847	4.68635	1.4214e-07	0.000227416
MAN2A2	mannosidase alpha class 2A member 2	2.18806	4.55691	6.5731e-07	0.000768859
OGFOD2	2-oxoglutarate and iron dependent oxygenase domain containing 2	2.17504	4.51597	1.93668e-07	0.000280809
TMEM203	transmembrane protein 203	2.16843	4.49535	9.72624e-07	0.00100849
SEPT4	septin 4	2.1619	4.47504	2.54348e-05	0.0107285
H2AFX	H2A histone family member X	2.15485	4.45322	0.000225021	0.0457253
HYAL2	hyaluronoglucosaminidase 2	2.11182	4.32237	2.12226e-05	0.00943796
TUBA1B	tubulin alpha 1b	2.08857	4.25326	0.000220084	0.0448699
ADAMTS18	ADAM metallopeptidase with thrombospondin type 1 motif 18	2.08535	4.24379	9.55271e-07	0.000999766
IRF6	interferon regulatory factor 6	2.07996	4.22795	4.56673e-05	0.0158126
NLRP3	NLR family pyrin domain containing 3	2.07735	4.22033	4.24432e-05	0.0150328
SOCS2	suppressor of cytokine signaling 2	2.06322	4.17918	1.2224e-05	0.00639668
HCAR2	hydroxycarboxylic acid receptor 2	2.04309	4.12128	4.46489e-05	0.0156547
MRPL48	mitochondrial ribosomal protein L48	2.00638	4.01774	1.04761e-12	1.04158e-08
CAST	calpastatin	1.90794	3.75274	1.091e-06	0.00108472
RAP1GAP	RAP1 GTPase activating protein	1.88811	3.70151	1.19634e-06	0.00114058
HEPACAM	hepatic and glial cell adhesion molecule	1.86354	3.63899	5.92164e-08	0.000105675
SPDEF	SAM pointed domain containing ETS transcription factor	1.84728	3.59822	7.43696e-09	2.04394e-05
SEC16A	SEC16 homolog A, endoplasmic reticulum export factor	1.84079	3.58206	8.45755e-09	2.26394e-05
DYRK1B	dual specificity tyrosine phosphorylation regulated kinase 1B	1.82167	3.5349	2.17533e-05	0.00951962
AADAT	aminoadipate aminotransferase	1.81833	3.52672	1.84056e-05	0.0085115
DYRK2	dual specificity tyrosine phosphorylation regulated kinase 2	1.80065	3.48377	0.00025368	0.049804
MBTD1	mbt domain containing 1	1.73899	3.33801	3.17501e-05	0.0124843
MPRIP	myosin phosphatase Rho interacting protein	1.68862	3.22347	2.5487e-06	0.00202737
SCAPER	S-phase cyclin A associated protein in the ER	1.68156	3.20775	2.65389e-05	0.0109617
WDR25	WD repeat domain 25	1.68015	3.20462	1.4707e-05	0.00731806
CACNB4	calcium voltage-gated channel auxiliary subunit beta 4	1.65679	3.15314	0.000104471	0.0274373
KIAA1217	KIAA1217	1.64992	3.13816	7.27538e-05	0.0218253
ZFYVE21	zinc finger FYVE-type containing 21	1.62985	3.09481	3.68384e-05	0.0136375
TFCP2	transcription factor CP2	1.62685	3.08839	7.34548e-06	0.00440713
CEBPZOS	CEBPZ opposite strand	1.61889	3.07138	2.73929e-05	0.0112146
PCGF1	polycomb group ring finger 1	1.61606	3.06536	6.63404e-05	0.0207046
PLSCR3	phospholipid scramblase 3	1.60581	3.04367	2.20568e-08	5.29343e-05
FHL1	four and a half LIM domains 1	1.6038	3.03943	0.000230029	0.0461367
AP2S1	adaptor related protein complex 2 subunit sigma 1	1.58615	3.00247	0.000176254	0.0385145
SMARCB1	SWI/SNF related, matrix associated, actin dependent regulator of chromatin, subfamily b, member 1	1.57804	2.98563	2.8488e-05	0.0115609
SEC31A	SEC31 homolog A, COPII coat complex component	1.5497	2.92755	0.000162945	0.036393
AVPI1	arginine vasopressin induced 1	1.53324	2.89435	3.1635e-05	0.0124743
SLC25A16	solute carrier family 25 member 16	1.52181	2.87151	2.02232e-05	0.00908054
HECTD1	HECT domain E3 ubiquitin protein ligase 1	1.52083	2.86956	4.94628e-05	0.0166854
PDZRN3	PDZ domain containing ring finger 3	1.51397	2.85595	6.00352e-05	0.0192106
CIAPIN1	cytokine induced apoptosis inhibitor 1	1.51187	2.8518	2.08907e-08	5.19264e-05
CBX1	chromobox 1	1.49412	2.81691	3.3915e-05	0.013005
ZNF836	zinc finger protein 836	1.45681	2.745	5.55734e-05	0.018116
SP140	SP140 nuclear body protein	1.42302	2.68147	9.24772e-07	0.000982623
SINHCAF	SIN3-HDAC complex associated factor	1.41678	2.66989	9.09608e-07	0.000981102
ARHGAP6	Rho GTPase activating protein 6	1.41268	2.66232	5.7101e-05	0.0185272
TEF	TEF, PAR bZIP transcription factor	1.41186	2.66081	1.10245e-05	0.00597361
KLHL35	kelch like family member 35	1.40576	2.64956	4.86682e-05	0.0165681
SLC25A42	solute carrier family 25 member 42	1.39609	2.63188	0.000124233	0.0304982
RASA1	RAS p21 protein activator 1	1.3932	2.6266	0.000218271	0.0446141
CTDSPL2	CTD small phosphatase like 2	1.38763	2.61648	0.000119256	0.0299097
FDXR	ferredoxin reductase	1.36731	2.57989	0.000140455	0.0329136
NFATC3	nuclear factor of activated T cells 3	1.36023	2.56725	0.000210973	0.0438304
DEF6	DEF6, guanine nucleotide exchange factor	1.36001	2.56687	1.54536e-05	0.00752121
VASP	vasodilator stimulated phosphoprotein	1.35887	2.56484	8.55137e-07	0.000944689
SMC3	structural maintenance of chromosomes 3	1.34703	2.54387	0.00019723	0.0419113
SMC6	structural maintenance of chromosomes 6	1.30349	2.46826	2.44266e-05	0.010494
MYH1	myosin heavy chain 1	1.29299	2.45035	9.18664e-05	0.0256259
GXYLT1	glucoside xylosyltransferase 1	1.2875	2.44105	0.000242763	0.0479992
TTC8	tetratricopeptide repeat domain 8	1.28135	2.43067	4.76944e-05	0.0163789
CPEB3	cytoplasmic polyadenylation element binding protein 3	1.26242	2.39898	0.000189753	0.0407602
TSKU	tsukushi, small leucine rich proteoglycan	1.25366	2.38445	3.56075e-05	0.0133956
ZNF155	zinc finger protein 155	1.2534	2.38402	9.39216e-05	0.0261107
KCNH2	potassium voltage-gated channel subfamily H member 2	1.23061	2.34666	0.000158823	0.0355996
PLXNB1	plexin B1	1.222	2.33271	5.27267e-05	0.0175029
VASH1	vasohibin 1	1.21226	2.317	0.000220783	0.0449297
DMBT1	deleted in malignant brain tumors 1	1.20324	2.30255	9.45257e-05	0.0261107
TEAD1	TEA domain transcription factor 1	1.19869	2.29531	2.60328e-05	0.0108492
LIN28A	lin-28 homolog A	1.17437	2.25695	2.18166e-05	0.00951962
NSD1	nuclear receptor binding SET domain protein 1	1.13517	2.19645	0.000205332	0.0429146
ADGRE2	adhesion G protein-coupled receptor E2	1.13389	2.1945	0.000178819	0.0389525
NFAT5	nuclear factor of activated T cells 5	1.11461	2.16536	0.000199104	0.0420084
PDE4D	phosphodiesterase 4D	1.05744	2.08123	0.000253051	0.0497733
MEF2D	myocyte enhancer factor 2D	-1.00934	-2.01299	0.000173066	0.0382987
MATK	megakaryocyte-associated tyrosine kinase	-1.02275	-2.03179	0.000148769	0.0341715
TLK1	tousled like kinase 1	-1.07031	-2.09989	0.00018713	0.0403446
ANKRD11	ankyrin repeat domain 11	-1.09406	-2.13473	0.000217403	0.0446141
NFYC	nuclear transcription factor Y subunit gamma	-1.09556	-2.13696	0.000134149	0.0321947
ACACA	acetyl-CoA carboxylase alpha	-1.10089	-2.14487	0.000143887	0.0333189
STEAP3	STEAP3 metalloreductase	-1.12098	-2.17494	0.000112786	0.0288589
TENT5A	terminal nucleotidyltransferase 5A	-1.1442	-2.21024	0.000211914	0.043895
CHST12	carbohydrate sulfotransferase 12	-1.15033	-2.21965	0.00019085	0.0408698
MALRD1	MAM and LDL receptor class A domain containing 1	-1.16408	-2.2409	0.000139258	0.0327507
LRRC15	leucine rich repeat containing 15	-1.17228	-2.25367	0.000105567	0.0275215
GRIK1	glutamate ionotropic receptor kainate type subunit 1	-1.17882	-2.26392	0.000143302	0.03328
DCTN6	dynactin subunit 6	-1.19012	-2.28172	0.000217525	0.0446141
SLC6A17	solute carrier family 6 member 17	-1.19265	-2.28573	0.000130773	0.0317125
TRIL	TLR4 interactor with leucine rich repeats	-1.19882	-2.29551	0.000155322	0.0351116
CHRM2	cholinergic receptor muscarinic 2	-1.20806	-2.31026	9.96474e-05	0.0269107
TMEM91	transmembrane protein 91	-1.20926	-2.31219	0.000123171	0.0303985
TRPM5	transient receptor potential cation channel subfamily M member 5	-1.22018	-2.32975	6.97744e-05	0.0213456
TPCN1	two pore segment channel 1	-1.22293	-2.33421	8.0491e-05	0.0232969
ITGB8	integrin subunit beta 8	-1.22435	-2.33651	9.65699e-05	0.0263982
TRAPPC1	trafficking protein particle complex 1	-1.22447	-2.3367	0.00016451	0.0365799
STAM	signal transducing adaptor molecule	-1.22872	-2.34359	0.000193283	0.0412638
SPIRE1	spire type actin nucleation factor 1	-1.24286	-2.36667	0.000145842	0.0336101
TECR	trans-2,3-enoyl-CoA reductase	-1.24798	-2.37508	5.21856e-05	0.0174196
AFAP1L1	actin filament associated protein 1 like 1	-1.2487	-2.37627	1.21768e-05	0.00639602
CXCR5	C-X-C motif chemokine receptor 5	-1.24948	-2.37756	0.000151764	0.0345741
CHST6	carbohydrate sulfotransferase 6	-1.26058	-2.39591	9.97586e-05	0.0269107
XPNPEP1	X-prolyl aminopeptidase 1	-1.26436	-2.40221	0.000120963	0.0301206
SEC62	SEC62 homolog, preprotein translocation factor	-1.26496	-2.4032	9.1028e-06	0.00515212
IGDCC3	immunoglobulin superfamily DCC subclass member 3	-1.27152	-2.41415	0.000243934	0.0481623
PCDH7	protocadherin 7	-1.27469	-2.41947	9.83917e-05	0.0266971
SNX24	sorting nexin 24	-1.27672	-2.42287	0.000217758	0.0446141
ZC3H12A	zinc finger CCCH-type containing 12A	-1.28528	-2.43729	3.55124e-05	0.0133956
SEPT9	septin 9	-1.28763	-2.44127	0.0002045	0.0429028
HS3ST1	heparan sulfate-glucosamine 3-sulfotransferase 1	-1.2884	-2.44257	6.95601e-05	0.0213269
VAMP4	vesicle associated membrane protein 4	-1.29274	-2.44993	6.55876e-05	0.0206083
BPTF	bromodomain PHD finger transcription factor	-1.29981	-2.46196	7.45181e-05	0.0221163
SLC7A5	solute carrier family 7 member 5	-1.31207	-2.48298	0.000153338	0.0347621
SLC40A1	solute carrier family 40 member 1	-1.31622	-2.49013	4.22631e-05	0.0150072
PCDHGA6	protocadherin gamma subfamily A, 6	-1.31644	-2.49051	0.000203753	0.042842
KCNAB2	potassium voltage-gated channel subfamily A regulatory beta subunit 2	-1.3185	-2.49406	1.17095e-05	0.00619738
PLEKHA7	pleckstrin homology domain containing A7	-1.31856	-2.49417	0.000119715	0.0299708
CNNM2	cyclin and CBS domain divalent metal cation transport mediator 2	-1.3203	-2.49718	3.15763e-05	0.0124743
PPP3CA	protein phosphatase 3 catalytic subunit alpha	-1.32436	-2.50422	0.000228492	0.0460274
NF2	neurofibromin 2	-1.3249	-2.50516	1.96472e-05	0.00895451
GDI1	GDP dissociation inhibitor 1	-1.33108	-2.51591	2.64048e-05	0.0109388
DBP	D-box binding PAR bZIP transcription factor	-1.33117	-2.51607	0.000105582	0.0275215
CRYGB	crystallin gamma B	-1.34171	-2.53452	3.83213e-05	0.0140372
CASKIN2	CASK interacting protein 2	-1.34186	-2.53479	0.000208048	0.0433522
PSEN2	presenilin 2	-1.3442	-2.5389	7.16285e-05	0.0217219
NACC2	NACC family member 2	-1.34734	-2.54443	9.09664e-05	0.025477
LTBP2	latent transforming growth factor beta binding protein 2	-1.35307	-2.55456	3.74756e-05	0.0138
EFNB2	ephrin B2	-1.35377	-2.55579	5.99862e-05	0.0192106
CTXN3	cortexin 3	-1.35424	-2.55663	0.000103889	0.0273879
GRB10	growth factor receptor bound protein 10	-1.35755	-2.56249	1.98572e-05	0.00900297
TRAF3IP2	TRAF3 interacting protein 2	-1.35842	-2.56404	0.00011741	0.0294998
CACNA1C	calcium voltage-gated channel subunit alpha1 C	-1.36595	-2.57745	0.000163147	0.036393
TNS2	tensin 2	-1.37056	-2.58571	2.17606e-05	0.00951962
C1QTNF1	C1q and TNF related 1	-1.37068	-2.58592	5.38984e-05	0.0177174
SLC45A3	solute carrier family 45 member 3	-1.37681	-2.59694	0.000218066	0.0446141
SYT6	synaptotagmin 6	-1.38199	-2.60627	0.000254969	0.0499161
TTBK1	tau tubulin kinase 1	-1.38661	-2.61463	0.000100609	0.0270354
UHRF1	ubiquitin like with PHD and ring finger domains 1	-1.3871	-2.61553	7.67352e-05	0.0225817
ABHD6	abhydrolase domain containing 6	-1.39621	-2.63208	0.000216593	0.0446141
BUD31	BUD31 homolog	-1.40014	-2.63927	7.44295e-05	0.0221163
TRIB3	tribbles pseudokinase 3	-1.40262	-2.64382	4.45409e-05	0.0156547
UBE3B	ubiquitin protein ligase E3B	-1.40824	-2.65412	0.000236123	0.046953
TMEM167A	transmembrane protein 167A	-1.42193	-2.67945	8.83268e-05	0.0249846
ZNF385C	zinc finger protein 385C	-1.42562	-2.68629	0.000135181	0.0323307
ELMOD1	ELMO domain containing 1	-1.44717	-2.72672	8.77364e-05	0.0248726
DIDO1	death inducer-obliterator 1	-1.45082	-2.73363	0.000150132	0.0343419
BFAR	bifunctional apoptosis regulator	-1.45182	-2.73552	0.000211733	0.043895
PHACTR2	phosphatase and actin regulator 2	-1.45487	-2.74132	0.000156467	0.0352119
RADIL	Rap associating with DIL domain	-1.47007	-2.77035	8.98898e-05	0.0252772
CMAS	cytidine monophosphate N-acetylneuraminic acid synthetase	-1.47085	-2.77186	4.60632e-05	0.0159101
RIMS2	regulating synaptic membrane exocytosis 2	-1.47136	-2.77284	3.35467e-05	0.0129709
C1QTNF2	C1q and TNF related 2	-1.47236	-2.77474	1.59537e-05	0.00768397
FAF1	Fas associated factor 1	-1.47248	-2.77498	5.6932e-08	0.000102918
KCNIP1	potassium voltage-gated channel interacting protein 1	-1.47341	-2.77677	0.000225416	0.0457387
CLDN20	claudin 20	-1.48187	-2.7931	0.000181439	0.0392775
TUSC2	tumor suppressor 2, mitochondrial calcium regulator	-1.48517	-2.7995	1.75865e-06	0.00151108
BAIAP2	BAI1 associated protein 2	-1.48953	-2.80797	0.000205663	0.0429195
GALT	galactose-1-phosphate uridylyltransferase	-1.49351	-2.81574	0.000124872	0.0305475
LARGE1	LARGE xylosyl- and glucuronyltransferase 1	-1.49424	-2.81715	3.06041e-06	0.00227804
NFE2	nuclear factor, erythroid 2	-1.49789	-2.8243	6.69412e-05	0.0208218
TMEM154	transmembrane protein 154	-1.49908	-2.82662	0.000178479	0.0389394
REPS2	RALBP1 associated Eps domain containing 2	-1.50472	-2.83769	0.000128955	0.0313808
POLE4	DNA polymerase epsilon 4, accessory subunit	-1.51097	-2.85002	2.42135e-05	0.0104347
POLQ	DNA polymerase theta	-1.51224	-2.85252	1.49554e-05	0.00738197
DKK2	dickkopf WNT signaling pathway inhibitor 2	-1.51513	-2.85825	7.48269e-05	0.0221607
HMBOX1	homeobox containing 1	-1.51525	-2.85849	2.58881e-05	0.0108213
EIF2B5	eukaryotic translation initiation factor 2B subunit epsilon	-1.5154	-2.85878	4.29711e-06	0.00291774
MKRN2OS	MKRN2 opposite strand	-1.51893	-2.86578	0.000209527	0.043595
GARNL3	GTPase activating Rap/RanGAP domain like 3	-1.52337	-2.87463	7.95414e-05	0.0232113
POMP	proteasome maturation protein	-1.53161	-2.89109	0.000128677	0.0313682
FGFR1	fibroblast growth factor receptor 1	-1.53373	-2.89534	2.49381e-05	0.0106155
TLE2	transducin like enhancer of split 2	-1.5355	-2.89888	0.000198387	0.0420084
RHBDD2	rhomboid domain containing 2	-1.53886	-2.90565	9.18631e-05	0.0256259
TXNL1	thioredoxin like 1	-1.53933	-2.9066	0.000135501	0.0323518
PHACTR1	phosphatase and actin regulator 1	-1.53938	-2.9067	1.47208e-05	0.00731806
EVA1A	eva-1 homolog A, regulator of programmed cell death	-1.54331	-2.91463	2.16966e-05	0.00951962
TTYH1	tweety family member 1	-1.54737	-2.92284	0.000114775	0.0292603
NRG1	neuregulin 1	-1.5535	-2.93528	2.7199e-06	0.00211506
CNTN2	contactin 2	-1.55521	-2.93876	2.7369e-06	0.00211646
CNBD2	cyclic nucleotide binding domain containing 2	-1.55802	-2.94449	9.45422e-05	0.0261107
TMEM74	transmembrane protein 74	-1.55907	-2.94664	0.000181174	0.0392775
DCUN1D2	defective in cullin neddylation 1 domain containing 2	-1.56618	-2.9612	0.000204967	0.0429028
ST3GAL4	ST3 beta-galactoside alpha-2,3-sialyltransferase 4	-1.56705	-2.96299	1.92439e-05	0.00884047
GJC1	gap junction protein gamma 1	-1.57067	-2.97042	6.19851e-05	0.0196987
SLC1A4	solute carrier family 1 member 4	-1.57798	-2.98553	0.000164059	0.0365378
NLRP12	NLR family pyrin domain containing 12	-1.58071	-2.99118	3.84385e-05	0.0140432
GABRA6	gamma-aminobutyric acid type A receptor alpha6 subunit	-1.58157	-2.99296	7.10197e-05	0.0216789
SGCD	sarcoglycan delta	-1.58373	-2.99743	2.23455e-06	0.00182964
ASIC2	acid sensing ion channel subunit 2	-1.58991	-3.01031	0.000239476	0.0474842
TMEM178A	transmembrane protein 178A	-1.59064	-3.01183	0.000226099	0.0458105
CSMD2	CUB and Sushi multiple domains 2	-1.59599	-3.02303	5.74659e-05	0.0186022
ZBTB49	zinc finger and BTB domain containing 49	-1.59886	-3.02904	0.000187936	0.0404323
MUC21	mucin 21, cell surface associated	-1.60855	-3.04944	8.95776e-05	0.0252404
PRDM2	PR/SET domain 2	-1.61693	-3.06722	0.00013208	0.0318079
HMGN5	high mobility group nucleosome binding domain 5	-1.61714	-3.06766	0.000126098	0.0307933
GTF2A1	general transcription factor IIA subunit 1	-1.62143	-3.07679	3.5029e-05	0.0133041
DMPK	DM1 protein kinase	-1.62603	-3.08663	9.0965e-05	0.025477
BEGAIN	brain enriched guanylate kinase associated	-1.63334	-3.10231	5.11763e-05	0.0171238
ESYT1	extended synaptotagmin 1	-1.63613	-3.10831	0.000198738	0.0420084
BLNK	B cell linker	-1.63788	-3.11209	0.000150251	0.0343419
ILDR2	immunoglobulin like domain containing receptor 2	-1.64284	-3.12279	9.86678e-06	0.00549362
ZNF280D	zinc finger protein 280D	-1.64393	-3.12516	4.63294e-07	0.000560766
B3GNTL1	UDP-GlcNAc:betaGal beta-1,3-N-acetylglucosaminyltransferase like 1	-1.64559	-3.12876	4.12077e-05	0.0147453
AVPR1A	arginine vasopressin receptor 1A	-1.64603	-3.12971	0.000195107	0.0415896
PTH1R	parathyroid hormone 1 receptor	-1.64938	-3.13699	0.00012143	0.0301829
GRIK3	glutamate ionotropic receptor kainate type subunit 3	-1.65275	-3.14432	6.67166e-06	0.00412738
CYTL1	cytokine like 1	-1.65843	-3.15672	0.000233986	0.0465947
GPCPD1	glycerophosphocholine phosphodiesterase 1	-1.66221	-3.16501	8.56477e-05	0.0244458
LPP	LIM domain containing preferred translocation partner in lipoma	-1.66363	-3.16812	2.5421e-05	0.0107285
HGS	hepatocyte growth factor-regulated tyrosine kinase substrate	-1.66818	-3.17814	7.15625e-06	0.00431218
CEACAM20	carcinoembryonic antigen related cell adhesion molecule 20	-1.66996	-3.18206	9.43126e-05	0.0261107
SV2C	synaptic vesicle glycoprotein 2C	-1.67055	-3.18336	0.000103226	0.0273686
DMD	dystrophin	-1.67179	-3.1861	3.27506e-05	0.0127339
FGF18	fibroblast growth factor 18	-1.67378	-3.19049	4.13412e-09	1.33825e-05
ATP8A2	ATPase phospholipid transporting 8A2	-1.67961	-3.20342	0.000201744	0.0424837
PRKG1	protein kinase cGMP-dependent 1	-1.68012	-3.20455	0.000111879	0.0288321
CRACR2A	calcium release activated channel regulator 2A	-1.68282	-3.21054	2.63361e-06	0.00207111
GJC2	gap junction protein gamma 2	-1.68579	-3.21717	2.99098e-05	0.011998
B2M	beta-2-microglobulin	-1.68996	-3.22648	5.08157e-05	0.0170441
SLC25A14	solute carrier family 25 member 14	-1.69826	-3.2451	7.96836e-07	0.00089448
LRRC31	leucine rich repeat containing 31	-1.70597	-3.26249	0.000175912	0.0385001
FCHO2	FCH domain only 2	-1.70755	-3.26606	2.01413e-07	0.000286079
CNKSR2	connector enhancer of kinase suppressor of Ras 2	-1.7126	-3.2775	7.42836e-05	0.0221163
LRRC4B	leucine rich repeat containing 4B	-1.71677	-3.287	4.25316e-06	0.00290205
SRD5A2	steroid 5 alpha-reductase 2	-1.72496	-3.30572	4.17033e-05	0.0148492
XRN1	5'-3' exoribonuclease 1	-1.72574	-3.3075	1.3041e-05	0.0067733
RNF31	ring finger protein 31	-1.72604	-3.30818	1.11993e-05	0.0060422
SORBS1	sorbin and SH3 domain containing 1	-1.72715	-3.31074	0.000242706	0.0479992
MTMR12	myotubularin related protein 12	-1.72936	-3.31582	0.00017939	0.0389986
TRIM47	tripartite motif containing 47	-1.73077	-3.31906	1.64825e-05	0.00783033
TOM1	target of myb1 membrane trafficking protein	-1.73216	-3.32224	1.40454e-05	0.00705795
NFKBIZ	NFKB inhibitor zeta	-1.74229	-3.34566	1.74025e-05	0.00818358
BNC1	basonuclin 1	-1.74312	-3.34758	3.59492e-06	0.00257935
AP1G1	adaptor related protein complex 1 subunit gamma 1	-1.74406	-3.34976	1.69628e-08	4.37248e-05
PGR	progesterone receptor	-1.74494	-3.35181	0.000104685	0.0274418
ITFG2	integrin alpha FG-GAP repeat containing 2	-1.75067	-3.36515	0.000101808	0.0272194
MED27	mediator complex subunit 27	-1.75523	-3.37581	0.000140455	0.0329136
C2CD4C	C2 calcium dependent domain containing 4C	-1.75617	-3.37801	0.000170526	0.0377968
VPS13B	vacuolar protein sorting 13 homolog B	-1.76801	-3.40583	0.000130688	0.0317125
ZNF346	zinc finger protein 346	-1.76915	-3.40853	0.000248849	0.0490631
UBE2Q2	ubiquitin conjugating enzyme E2 Q2	-1.77146	-3.41399	8.49735e-08	0.000144243
XKR8	XK related 8	-1.77702	-3.42717	5.90452e-05	0.019025
ARID3B	AT-rich interaction domain 3B	-1.77876	-3.43131	0.000138191	0.0326752
PA2G4	proliferation-associated 2G4	-1.77908	-3.43208	2.94353e-05	0.0118417
ENAH	ENAH, actin regulator	-1.78005	-3.43438	0.000102272	0.0272194
BRMS1L	BRMS1 like transcriptional repressor	-1.78403	-3.44387	6.3305e-05	0.0200723
CERS2	ceramide synthase 2	-1.7867	-3.45025	0.00012382	0.0304627
RAI1	retinoic acid induced 1	-1.79176	-3.46237	6.44334e-05	0.0203374
CD226	CD226 molecule	-1.80273	-3.48879	0.000116418	0.0293566
EEF1AKMT2	EEF1A lysine methyltransferase 2	-1.80796	-3.50147	0.000137475	0.0326551
TSPAN7	tetraspanin 7	-1.8111	-3.50911	0.000112623	0.0288589
MYO5A	myosin VA	-1.81212	-3.51157	3.61103e-05	0.0135106
BAHCC1	BAH domain and coiled-coil containing 1	-1.81312	-3.514	3.6142e-05	0.0135106
NOV	nephroblastoma overexpressed	-1.81537	-3.51951	3.65256e-06	0.002583
GMIP	GEM interacting protein	-1.81876	-3.52777	0.000122348	0.0303028
PPM1D	protein phosphatase, Mg2+/Mn2+ dependent 1D	-1.83004	-3.55548	3.43881e-05	0.0131501
TSPOAP1	TSPO associated protein 1	-1.83006	-3.55553	1.33024e-06	0.00123696
KCNQ1	potassium voltage-gated channel subfamily Q member 1	-1.83195	-3.56019	2.46876e-05	0.0105735
MYH11	myosin heavy chain 11	-1.83953	-3.57894	8.84902e-05	0.0249846
ZBTB18	zinc finger and BTB domain containing 18	-1.84135	-3.58345	2.43806e-09	8.93068e-06
RAPGEF2	Rap guanine nucleotide exchange factor 2	-1.84284	-3.58716	3.72185e-08	7.4009e-05
TMEM68	transmembrane protein 68	-1.86615	-3.64559	0.000110013	0.0284632
FILIP1L	filamin A interacting protein 1 like	-1.88117	-3.68373	1.62655e-05	0.00778032
STRADA	STE20-related kinase adaptor alpha	-1.8828	-3.68789	2.58196e-05	0.0108213
LEPR	leptin receptor	-1.88483	-3.69308	4.77734e-05	0.0163789
GRID2IP	Grid2 interacting protein	-1.88503	-3.6936	5.39302e-05	0.0177174
THBS4	thrombospondin 4	-1.88914	-3.70414	6.92738e-05	0.021286
CYP27C1	cytochrome P450 family 27 subfamily C member 1	-1.89617	-3.72225	0.000174771	0.0384088
TOX2	TOX high mobility group box family member 2	-1.9001	-3.7324	8.37701e-05	0.0239925
GPRC5B	G protein-coupled receptor class C group 5 member B	-1.9064	-3.74872	9.71674e-05	0.0264681
THRA	thyroid hormone receptor alpha	-1.9093	-3.75627	0.000142668	0.0332641
CARNS1	carnosine synthase 1	-1.91019	-3.75858	1.38917e-05	0.00705713
ARHGAP21	Rho GTPase activating protein 21	-1.91327	-3.76663	4.69021e-05	0.0161598
TAL1	TAL bHLH transcription factor 1, erythroid differentiation factor	-1.91382	-3.76805	1.33298e-06	0.00123696
SMAD9	SMAD family member 9	-1.91574	-3.77306	2.80663e-08	6.10421e-05
CD300LG	CD300 molecule like family member g	-1.91691	-3.77613	1.6724e-05	0.007918
PRICKLE2	prickle planar cell polarity protein 2	-1.91857	-3.78048	0.000124451	0.0304982
ATF3	activating transcription factor 3	-1.92415	-3.79512	8.30709e-06	0.00479795
MUC12	mucin 12, cell surface associated	-1.92619	-3.80051	0.000139289	0.0327507
VCP	valosin containing protein	-1.92779	-3.80473	0.000145829	0.0336101
FXN	frataxin	-1.9375	-3.83042	1.20727e-05	0.00636539
SIK1	salt inducible kinase 1	-1.94297	-3.84498	2.08894e-05	0.00933956
TM7SF2	transmembrane 7 superfamily member 2	-1.94551	-3.85175	6.50059e-05	0.0204717
CSMD3	CUB and Sushi multiple domains 3	-1.95538	-3.87818	8.57039e-05	0.0244458
FILIP1	filamin A interacting protein 1	-1.9555	-3.87849	4.88878e-05	0.0165974
EHD3	EH domain containing 3	-1.96418	-3.90191	1.51285e-05	0.00741483
SRMS	src-related kinase lacking C-terminal regulatory tyrosine and N-terminal myristylation sites	-1.96468	-3.90327	2.49331e-05	0.0106155
IL2RB	interleukin 2 receptor subunit beta	-1.96567	-3.90593	3.20987e-06	0.00236401
COL5A1	collagen type V alpha 1 chain	-1.9682	-3.9128	2.42886e-07	0.000334738
REST	RE1 silencing transcription factor	-1.97285	-3.92544	3.37343e-05	0.0129714
KCNT1	potassium sodium-activated channel subfamily T member 1	-1.97314	-3.92622	0.000138499	0.0326752
LRRC4C	leucine rich repeat containing 4C	-1.97504	-3.93139	3.13285e-08	6.41289e-05
NHSL2	NHS like 2	-1.97565	-3.93307	2.92531e-05	0.0118369
CNOT2	CCR4-NOT transcription complex subunit 2	-1.97824	-3.94013	8.09693e-07	0.000901641
ZNF384	zinc finger protein 384	-1.97882	-3.9417	1.79989e-05	0.00835121
DGCR2	DiGeorge syndrome critical region gene 2	-1.98251	-3.95179	2.28569e-05	0.00988064
GSG1L	GSG1 like	-1.98471	-3.95784	4.95067e-05	0.0166854
MCFD2	multiple coagulation factor deficiency 2	-1.98927	-3.97037	5.26264e-05	0.0175029
TNPO1	transportin 1	-1.99283	-3.98018	0.000137434	0.0326551
MYO1F	myosin IF	-2.01263	-4.03516	0.000109964	0.0284632
CYP4F22	cytochrome P450 family 4 subfamily F member 22	-2.01426	-4.03973	4.17115e-05	0.0148492
AAK1	AP2 associated kinase 1	-2.01804	-4.05033	0.000115725	0.0293414
CPPED1	calcineurin like phosphoesterase domain containing 1	-2.0207	-4.05781	2.09342e-05	0.00933956
C21orf62	chromosome 21 open reading frame 62	-2.02734	-4.07652	3.9882e-05	0.0144567
HDC	histidine decarboxylase	-2.03304	-4.09265	4.48916e-05	0.0157002
EXT1	exostosin glycosyltransferase 1	-2.03998	-4.1124	1.66903e-07	0.000261035
CREB1	cAMP responsive element binding protein 1	-2.0404	-4.1136	0.000140949	0.0329737
USF2	upstream transcription factor 2, c-fos interacting	-2.0411	-4.11559	4.90079e-06	0.00318495
BEND3	BEN domain containing 3	-2.04215	-4.1186	0.000175391	0.0384464
SLC25A37	solute carrier family 25 member 37	-2.0568	-4.16063	6.70152e-05	0.0208218
MAP6	microtubule associated protein 6	-2.06804	-4.19316	4.01729e-09	1.3314e-05
VPS26B	VPS26, retromer complex component B	-2.07062	-4.20067	1.10293e-05	0.00597361
TRIM38	tripartite motif containing 38	-2.07954	-4.22672	8.04116e-06	0.0046637
MYO9A	myosin IXA	-2.08133	-4.23196	1.9685e-07	0.00028248
JAM3	junctional adhesion molecule 3	-2.08476	-4.24204	5.51463e-05	0.018019
PSD	pleckstrin and Sec7 domain containing	-2.0876	-4.25039	6.13497e-05	0.0195414
MDC1	mediator of DNA damage checkpoint 1	-2.08916	-4.255	8.22496e-05	0.0236056
ATP1B2	ATPase Na+/K+ transporting subunit beta 2	-2.09288	-4.26598	0.000108473	0.0282222
IFT46	intraflagellar transport 46	-2.0944	-4.2705	1.37442e-05	0.00703355
SALL2	spalt like transcription factor 2	-2.09684	-4.2777	8.15271e-05	0.0234952
CACNA2D4	calcium voltage-gated channel auxiliary subunit alpha2delta 4	-2.09721	-4.2788	9.44542e-06	0.00530143
FAM102B	family with sequence similarity 102 member B	-2.10822	-4.3116	3.86808e-05	0.0140947
CPSF2	cleavage and polyadenylation specific factor 2	-2.10911	-4.31426	3.28389e-07	0.000435335
FAT3	FAT atypical cadherin 3	-2.11112	-4.32026	7.26156e-05	0.0218253
FAM168A	family with sequence similarity 168 member A	-2.11296	-4.32579	7.86586e-06	0.00460346
PRKX	protein kinase X-linked	-2.11409	-4.32916	2.89545e-06	0.00219039
ABI3BP	ABI family member 3 binding protein	-2.11532	-4.33286	3.64746e-05	0.0135389
RAB6A	RAB6A, member RAS oncogene family	-2.12998	-4.37711	0.000110301	0.0284848
FAM155A	family with sequence similarity 155 member A	-2.13032	-4.37816	0.000116067	0.0293566
PPP2R5C	protein phosphatase 2 regulatory subunit B'gamma	-2.14812	-4.43251	2.94075e-05	0.0118417
PPP1R9A	protein phosphatase 1 regulatory subunit 9A	-2.15053	-4.4399	8.05043e-05	0.0232969
OPN5	opsin 5	-2.16183	-4.47482	0.000253167	0.0497733
IDE	insulin degrading enzyme	-2.17222	-4.50716	7.30277e-05	0.0218604
PROSER1	proline and serine rich 1	-2.176	-4.51898	1.40196e-06	0.00128385
KCNMB3	potassium calcium-activated channel subfamily M regulatory beta subunit 3	-2.17844	-4.52664	0.00011526	0.0293058
SPIN1	spindlin 1	-2.17981	-4.53093	6.77438e-06	0.00415401
KCNN1	potassium calcium-activated channel subfamily N member 1	-2.18226	-4.53864	3.86688e-06	0.00267786
SNX15	sorting nexin 15	-2.18462	-4.54606	2.67411e-06	0.00209114
CTNND2	catenin delta 2	-2.18483	-4.54672	1.82188e-12	1.69064e-08
TACR1	tachykinin receptor 1	-2.1862	-4.55105	3.63094e-05	0.0135136
PLEKHG1	pleckstrin homology and RhoGEF domain containing G1	-2.18838	-4.55794	1.76469e-05	0.00824281
LAMC1	laminin subunit gamma 1	-2.1885	-4.55832	1.93715e-10	9.63005e-07
NRCAM	neuronal cell adhesion molecule	-2.20698	-4.61709	4.37705e-12	3.8079e-08
PHLDA2	pleckstrin homology like domain family A member 2	-2.20888	-4.62317	1.39496e-05	0.00705795
SLC1A2	solute carrier family 1 member 2	-2.21793	-4.65225	3.39698e-06	0.00246272
DUSP8	dual specificity phosphatase 8	-2.2264	-4.67964	3.48261e-05	0.0132812
AGO1	argonaute 1, RISC catalytic component	-2.23266	-4.70001	8.49375e-10	3.81383e-06
STK39	serine/threonine kinase 39	-2.23415	-4.70484	1.30555e-07	0.00021131
LUZP1	leucine zipper protein 1	-2.23466	-4.70651	3.27337e-06	0.00239809
ZNF233	zinc finger protein 233	-2.23589	-4.71053	1.79286e-06	0.00152169
VIPR1	vasoactive intestinal peptide receptor 1	-2.23975	-4.72315	1.0826e-05	0.0059328
ENTPD6	ectonucleoside triphosphate diphosphohydrolase 6 (putative)	-2.24337	-4.73503	0.000174943	0.0384088
PPP1R3B	protein phosphatase 1 regulatory subunit 3B	-2.25707	-4.7802	7.35308e-05	0.0219638
E2F2	E2F transcription factor 2	-2.26079	-4.79255	3.71302e-05	0.0137091
EED	embryonic ectoderm development	-2.26207	-4.7968	5.67287e-05	0.0184494
PFKP	phosphofructokinase, platelet	-2.27006	-4.82343	3.23885e-05	0.0126283
IGSF21	immunoglobin superfamily member 21	-2.2705	-4.8249	0.000179591	0.0389986
PPM1B	protein phosphatase, Mg2+/Mn2+ dependent 1B	-2.28703	-4.8805	2.14103e-05	0.00946096
SQOR	sulfide quinone oxidoreductase	-2.29225	-4.89818	1.9475e-05	0.0089172
SLC25A26	solute carrier family 25 member 26	-2.29233	-4.89846	6.8163e-05	0.0210376
ZBTB5	zinc finger and BTB domain containing 5	-2.29319	-4.90139	2.85609e-06	0.00217243
SEMA4C	semaphorin 4C	-2.29331	-4.90179	2.61756e-06	0.00207018
RHAG	Rh associated glycoprotein	-2.2942	-4.90484	7.63932e-05	0.0225287
BMP7	bone morphogenetic protein 7	-2.29535	-4.90873	8.47922e-06	0.00487713
HDAC4	histone deacetylase 4	-2.30198	-4.93132	0.00010422	0.0274233
KREMEN1	kringle containing transmembrane protein 1	-2.30973	-4.95789	4.46015e-05	0.0156547
KCNC1	potassium voltage-gated channel subfamily C member 1	-2.31217	-4.96629	1.77442e-06	0.00151528
CCDC153	coiled-coil domain containing 153	-2.32793	-5.02084	9.58468e-06	0.00535799
PDE4A	phosphodiesterase 4A	-2.33208	-5.0353	7.21866e-05	0.0217961
SFMBT2	Scm like with four mbt domains 2	-2.33409	-5.04232	8.19796e-05	0.0235768
MSI1	musashi RNA binding protein 1	-2.33855	-5.05794	1.62143e-05	0.00778032
PRKCZ	protein kinase C zeta	-2.3437	-5.07602	1.74772e-05	0.00819105
ENPP7	ectonucleotide pyrophosphatase/phosphodiesterase 7	-2.34432	-5.07823	0.000150743	0.0343979
TACC1	transforming acidic coiled-coil containing protein 1	-2.34785	-5.09064	1.57448e-05	0.00763622
EVI5L	ecotropic viral integration site 5 like	-2.35037	-5.09954	4.47612e-07	0.000551375
SEPT7	septin 7	-2.35989	-5.13333	0.000228104	0.0460274
SLC7A9	solute carrier family 7 member 9	-2.37301	-5.18019	3.36505e-05	0.0129714
MTX1	metaxin 1	-2.37469	-5.18626	1.85886e-05	0.00856769
DCP1B	decapping mRNA 1B	-2.38007	-5.20561	4.40361e-06	0.00294693
SENP7	SUMO specific peptidase 7	-2.38343	-5.21775	1.05865e-05	0.00582446
FAM92B	family with sequence similarity 92 member B	-2.39252	-5.25074	4.21314e-07	0.000528332
GATAD2A	GATA zinc finger domain containing 2A	-2.40065	-5.28041	0.000152335	0.0346474
ARHGEF4	Rho guanine nucleotide exchange factor 4	-2.40428	-5.29372	3.91102e-05	0.014214
PC	pyruvate carboxylase	-2.42124	-5.35632	1.39368e-06	0.00128385
HSD3B1	hydroxy-delta-5-steroid dehydrogenase, 3 beta- and steroid delta-isomerase 1	-2.42636	-5.37534	0.000100392	0.027029
MICU1	mitochondrial calcium uptake 1	-2.42892	-5.38491	7.84731e-06	0.00460346
ATAD2	ATPase family, AAA domain containing 2	-2.43403	-5.404	4.91946e-06	0.00318495
CDH7	cadherin 7	-2.43451	-5.40581	3.61691e-06	0.00258182
ITLN2	intelectin 2	-2.44059	-5.42866	4.98228e-06	0.00319589
MFF	mitochondrial fission factor	-2.45052	-5.46615	2.1538e-08	5.25962e-05
ZNF292	zinc finger protein 292	-2.45076	-5.46703	6.83466e-06	0.00415437
DCTN2	dynactin subunit 2	-2.462	-5.50981	6.26095e-09	1.81561e-05
PTBP1	polypyrimidine tract binding protein 1	-2.46821	-5.53359	4.51402e-05	0.0157476
SERINC4	serine incorporator 4	-2.47633	-5.56482	7.84526e-06	0.00460346
MAST2	microtubule associated serine/threonine kinase 2	-2.47885	-5.57452	3.65567e-06	0.002583
PDYN	prodynorphin	-2.4851	-5.59871	2.53625e-05	0.0107285
MTFR1L	mitochondrial fission regulator 1 like	-2.48594	-5.60201	2.93485e-07	0.000393119
ARHGEF10	Rho guanine nucleotide exchange factor 10	-2.48828	-5.61107	1.86607e-07	0.000280809
DYM	dymeclin	-2.49728	-5.64621	3.50776e-05	0.0133041
NXN	nucleoredoxin	-2.50069	-5.65956	3.78432e-06	0.00264703
ZMYND11	zinc finger MYND-type containing 11	-2.50203	-5.6648	0.000228991	0.0460612
JMJD1C	jumonji domain containing 1C	-2.50217	-5.66536	2.54887e-06	0.00202737
FRS3	fibroblast growth factor receptor substrate 3	-2.52363	-5.75026	2.55879e-05	0.0107605
APBB2	amyloid beta precursor protein binding family B member 2	-2.52793	-5.76745	7.87113e-06	0.00460346
KCNB1	potassium voltage-gated channel subfamily B member 1	-2.54572	-5.83899	7.15943e-05	0.0217219
NLGN2	neuroligin 2	-2.55014	-5.85691	5.31339e-06	0.00334855
HCN2	hyperpolarization activated cyclic nucleotide gated potassium and sodium channel 2	-2.55665	-5.88342	1.68947e-06	0.00146979
OSR1	odd-skipped related transciption factor 1	-2.59753	-6.05249	2.47656e-06	0.00199262
ATP9A	ATPase phospholipid transporting 9A (putative)	-2.60332	-6.07684	2.85358e-06	0.00217243
FAM57B	family with sequence similarity 57 member B	-2.61375	-6.12091	6.71567e-06	0.00413623
FBXO8	F-box protein 8	-2.61474	-6.12513	1.77733e-08	4.4981e-05
CTBP1	C-terminal binding protein 1	-2.62453	-6.16685	4.52579e-05	0.0157492
ANKRD1	ankyrin repeat domain 1	-2.62869	-6.18464	1.15907e-05	0.00619398
MPPED2	metallophosphoesterase domain containing 2	-2.63308	-6.20351	4.0364e-05	0.0145934
CGREF1	cell growth regulator with EF-hand domain 1	-2.64399	-6.25058	1.01519e-06	0.00103145
ABHD12	abhydrolase domain containing 12	-2.65623	-6.30382	1.00501e-05	0.00555127
SUSD1	sushi domain containing 1	-2.67458	-6.38453	0.000153078	0.0347598
AEBP2	AE binding protein 2	-2.67951	-6.40639	9.8653e-05	0.026716
SLC5A12	solute carrier family 5 member 12	-2.68732	-6.44114	4.72739e-07	0.000567266
NDRG4	NDRG family member 4	-2.68988	-6.45259	7.04882e-09	2.00237e-05
KLHL25	kelch like family member 25	-2.69056	-6.45562	1.35354e-05	0.00695224
LLGL2	LLGL2, scribble cell polarity complex component	-2.70116	-6.50324	0.000138295	0.0326752
FUBP3	far upstream element binding protein 3	-2.73671	-6.6655	2.34529e-09	8.82305e-06
HMGA2	high mobility group AT-hook 2	-2.75975	-6.77278	9.91144e-08	0.00016622
NR5A1	nuclear receptor subfamily 5 group A member 1	-2.76817	-6.81244	6.61372e-05	0.0206876
IL17A	interleukin 17A	-2.78328	-6.88414	1.32057e-05	0.00680805
KLF12	Kruppel like factor 12	-2.78925	-6.91272	8.41863e-08	0.000144243
SORD	sorbitol dehydrogenase	-2.79117	-6.92191	2.79243e-06	0.00214748
POLR3GL	RNA polymerase III subunit G like	-2.80429	-6.98515	0.0001441	0.0333189
PARP12	poly(ADP-ribose) polymerase family member 12	-2.81959	-7.05962	6.81753e-06	0.00415437
EMX2	empty spiracles homeobox 2	-2.82473	-7.08479	6.32586e-06	0.00393093
PLEKHG3	pleckstrin homology and RhoGEF domain containing G3	-2.83706	-7.14562	1.15241e-06	0.00111396
LONP2	lon peptidase 2, peroxisomal	-2.83803	-7.15043	3.04761e-09	1.06053e-05
SPTBN4	spectrin beta, non-erythrocytic 4	-2.85399	-7.22995	3.11559e-08	6.41289e-05
RUNX3	runt related transcription factor 3	-2.85792	-7.24969	1.18745e-06	0.00113991
IDO2	indoleamine 2,3-dioxygenase 2	-2.86341	-7.27733	8.02828e-06	0.0046637
GRM1	glutamate metabotropic receptor 1	-2.87048	-7.3131	8.81162e-07	0.000965775
PNPO	pyridoxamine 5'-phosphate oxidase	-2.88646	-7.39452	5.51187e-07	0.000650191
NDE1	nudE neurodevelopment protein 1	-2.90025	-7.46555	2.26644e-06	0.0018449
KYAT3	kynurenine aminotransferase 3	-2.90137	-7.47138	1.33189e-06	0.00123696
GAREM1	GRB2 associated regulator of MAPK1 subtype 1	-2.90988	-7.51558	0.000228373	0.0460274
WIPI2	WD repeat domain, phosphoinositide interacting 2	-2.91501	-7.54233	2.04003e-06	0.00171061
RNF13	ring finger protein 13	-2.91728	-7.5542	1.12087e-06	0.00110516
SSRP1	structure specific recognition protein 1	-2.92256	-7.58188	9.06157e-07	0.000981102
MIER3	MIER family member 3	-2.93461	-7.64549	7.94665e-07	0.00089448
SS18L1	SS18L1, nBAF chromatin remodeling complex subunit	-2.94284	-7.68922	0.000229997	0.0461367
CNGA3	cyclic nucleotide gated channel alpha 3	-2.94948	-7.72472	1.99946e-06	0.00168675
PRDM15	PR/SET domain 15	-2.95489	-7.75373	5.39687e-05	0.0177174
SLC25A25	solute carrier family 25 member 25	-2.96452	-7.80566	4.80636e-06	0.00315576
PTPN1	protein tyrosine phosphatase, non-receptor type 1	-2.96778	-7.82332	1.12743e-06	0.00110516
HOXD13	homeobox D13	-3.01696	-8.09458	9.57366e-05	0.0263556
ATP1B3	ATPase Na+/K+ transporting subunit beta 3	-3.03896	-8.21899	4.38362e-06	0.00294693
RCOR3	REST corepressor 3	-3.05048	-8.28485	3.1376e-06	0.00232308
ART2A	T-cell ecto-ADP-ribosyltransferase 1	-3.07281	-8.41409	0.000120301	0.0300095
SVIL	supervillin	-3.07597	-8.43253	0.000156587	0.0352119
RNF123	ring finger protein 123	-3.07614	-8.43358	5.55133e-06	0.00348071
BAG1	BCL2 associated athanogene 1	-3.09171	-8.52503	1.4453e-05	0.00723665
HNRNPR	heterogeneous nuclear ribonucleoprotein R	-3.09447	-8.54138	3.28176e-11	2.28403e-07
DNAH6	dynein axonemal heavy chain 6	-3.09783	-8.5613	1.90377e-07	0.000280809
DOC2B	double C2 domain beta	-3.10763	-8.61966	4.52951e-07	0.000553058
CCDC186	coiled-coil domain containing 186	-3.10889	-8.62721	1.93438e-07	0.000280809
GRAMD1B	GRAM domain containing 1B	-3.13563	-8.78859	1.82581e-11	1.49496e-07
PFKFB4	6-phosphofructo-2-kinase/fructose-2,6-biphosphatase 4	-3.1629	-8.95629	5.27397e-06	0.00334855
GSE1	Gse1 coiled-coil protein	-3.18318	-9.08305	4.06719e-05	0.0146288
CDK5R1	cyclin dependent kinase 5 regulatory subunit 1	-3.18435	-9.09043	2.26723e-07	0.000315587
REEP5	receptor accessory protein 5	-3.18547	-9.09748	4.54497e-05	0.0157765
RAPH1	Ras association (RalGDS/AF-6) and pleckstrin homology domains 1	-3.18716	-9.10818	1.29809e-08	3.4092e-05
HUNK	hormonally up-regulated Neu-associated kinase	-3.18825	-9.11506	9.43833e-07	0.000995279
CDC5L	cell division cycle 5 like	-3.19258	-9.14242	0.000122565	0.0303028
PAPD7	Non-canonical poly(A) RNA polymerase PAPD7	-3.22168	-9.3287	1.14866e-06	0.00111396
SYCP1	synaptonemal complex protein 1	-3.22615	-9.35768	0.000197175	0.0419113
KLF11	Kruppel like factor 11	-3.24212	-9.46182	5.50292e-07	0.000650191
MEGF8	multiple EGF like domains 8	-3.25612	-9.55411	1.72932e-06	0.00149511
URGCP	upregulator of cell proliferation	-3.26677	-9.6249	2.04589e-07	0.000287655
CYFIP1	cytoplasmic FMR1 interacting protein 1	-3.30018	-9.85037	4.60616e-06	0.00305312
TMEM198	transmembrane protein 198	-3.30956	-9.91463	0.000143453	0.03328
SLC17A5	solute carrier family 17 member 5	-3.32229	-10.0025	9.5179e-10	4.11299e-06
PRELID3A	PRELI domain containing 3A	-3.33538	-10.0936	2.35034e-08	5.4526e-05
PATL2	PAT1 homolog 2	-3.34562	-10.1656	1.55097e-06	0.00136638
COBL	cordon-bleu WH2 repeat protein	-3.354	-10.2248	4.84417e-06	0.00316566
SIRT7	sirtuin 7	-3.3874	-10.4643	3.93921e-07	0.000506765
ZNF569	zinc finger protein 569	-3.41793	-10.6881	1.22899e-06	0.00116373
B4GALNT1	beta-1,4-N-acetyl-galactosaminyltransferase 1	-3.42352	-10.7296	0.000109966	0.0284632
HRH3	histamine receptor H3	-3.42675	-10.7536	4.64609e-06	0.00306499
IPCEF1	interaction protein for cytohesin exchange factors 1	-3.43397	-10.8076	1.46926e-06	0.00131856
NMD3	NMD3 ribosome export adaptor	-3.47858	-11.147	3.13278e-05	0.0124591
HRC	histidine rich calcium binding protein	-3.48109	-11.1664	1.49047e-06	0.00132144
TNFSF14	TNF superfamily member 14	-3.50487	-11.3519	8.14391e-11	4.7233e-07
SUMO3	small ubiquitin-like modifier 3	-3.52039	-11.4747	9.75096e-10	4.11299e-06
UBE2K	ubiquitin conjugating enzyme E2 K	-3.57293	-11.9004	4.33108e-06	0.00292653
KIAA0319	KIAA0319	-3.58617	-12.01	1.40307e-05	0.00705795
ZNF226	zinc finger protein 226	-3.59978	-12.1239	3.82169e-06	0.0026598
EPN1	epsin 1	-3.60034	-12.1286	1.38529e-05	0.00705713
NR2C2	nuclear receptor subfamily 2 group C member 2	-3.60247	-12.1465	4.02538e-07	0.000509375
CCDC24	coiled-coil domain containing 24	-3.61428	-12.2463	5.3165e-06	0.00334855
DEDD2	death effector domain containing 2	-3.6647	-12.6819	0.000143331	0.03328
NEXN	nexilin F-actin binding protein	-3.66503	-12.6848	1.0356e-06	0.00104457
MAGI2	membrane associated guanylate kinase, WW and PDZ domain containing 2	-3.66803	-12.7112	5.2093e-08	9.79876e-05
DPM2	dolichyl-phosphate mannosyltransferase subunit 2, regulatory	-3.71536	-13.1351	3.53324e-07	0.000459635
CARMIL1	capping protein regulator and myosin 1 linker 1	-3.7383	-13.3456	2.40574e-11	1.76246e-07
ADM2	adrenomedullin 2	-3.74377	-13.3964	5.40802e-09	1.60164e-05
CDK18	cyclin dependent kinase 18	-3.80851	-14.0112	1.28513e-09	5.26128e-06
SEMA4G	semaphorin 4G	-3.81961	-14.1195	1.94494e-11	1.50404e-07
IPO13	importin 13	-3.84461	-14.3662	1.00314e-10	5.58531e-07
ABCF2	ATP binding cassette subfamily F member 2	-3.89957	-14.9241	3.19076e-05	0.0125109
SLC27A4	solute carrier family 27 member 4	-3.92157	-15.1534	1.16278e-07	0.000190415
PDK2	pyruvate dehydrogenase kinase 2	-3.93822	-15.3293	3.12892e-05	0.0124591
NAV1	neuron navigator 1	-3.94824	-15.4362	1.46876e-07	0.000232322
NOVA2	NOVA alternative splicing regulator 2	-3.97826	-15.7607	0	0
CD2AP	CD2 associated protein	-4.00833	-16.0927	5.55112e-16	1.28781e-11
TP53INP2	tumor protein p53 inducible nuclear protein 2	-4.01326	-16.1477	0	0
HECTD2	HECT domain E3 ubiquitin protein ligase 2	-4.04696	-16.5293	2.39232e-08	5.459e-05
DLC1	DLC1 Rho GTPase activating protein	-4.06263	-16.7098	6.43156e-05	0.0203374
RRNAD1	ribosomal RNA adenine dimethylase domain containing 1	-4.0743	-16.8456	4.86824e-05	0.0165681
TARS	threonyl-tRNA synthetase	-4.08981	-17.0277	0.000237605	0.0471803
MT-CO2	mitochondrially encoded cytochrome c oxidase II	-4.09193	-17.0527	1.69838e-05	0.00801374
NPDC1	neural proliferation, differentiation and control 1	-4.10604	-17.2203	1.12133e-13	1.56083e-09
DGAT1	diacylglycerol O-acyltransferase 1	-4.13173	-17.5297	4.36207e-07	0.000542123
ZNF174	zinc finger protein 174	-4.18507	-18.1899	1.67599e-06	0.00146723
BCO1	beta-carotene oxygenase 1	-4.19968	-18.3751	7.69407e-07	0.000885104
MARVELD3	MARVEL domain containing 3	-4.20267	-18.4133	5.53335e-13	6.4249e-09
TCTN1	tectonic family member 1	-4.2255	-18.7069	2.31448e-08	5.4526e-05
SMARCD1	SWI/SNF related, matrix associated, actin dependent regulator of chromatin, subfamily d, member 1	-4.24643	-18.9803	1.0878e-05	0.00593787
ZBTB24	zinc finger and BTB domain containing 24	-4.28193	-19.4531	3.63583e-10	1.74513e-06
AGRN	agrin	-4.33724	-20.2133	2.05391e-14	3.57368e-10
NRBP1	nuclear receptor binding protein 1	-4.45982	-22.006	1.0674e-06	0.00106889
NAPA	NSF attachment protein alpha	-4.47991	-22.3145	1.7551e-09	6.98004e-06
GDPD4	glycerophosphodiester phosphodiesterase domain containing 4	-4.49051	-22.4791	7.65794e-06	0.00455533
MAPK14	mitogen-activated protein kinase 14	-4.56935	-23.7417	7.64096e-06	0.00455533
ZNF615	zinc finger protein 615	-4.72282	-26.4065	7.73605e-11	4.68182e-07
GRM7	glutamate metabotropic receptor 7	-4.73131	-26.5623	0.000150095	0.0343419
ST3GAL2	ST3 beta-galactoside alpha-2,3-sialyltransferase 2	-4.7379	-26.684	2.76046e-07	0.000376708
CCDC9	coiled-coil domain containing 9	-4.79066	-27.6779	0	0
NCOA4	nuclear receptor coactivator 4	-4.79731	-27.8058	2.77848e-09	9.91667e-06
MSN	moesin	-4.79734	-27.8064	2.92253e-08	6.25849e-05
C21orf33	chromosome 21 open reading frame 33	-4.81502	-28.1492	5.13405e-08	9.78951e-05
NETO2	neuropilin and tolloid like 2	-4.89713	-29.7977	1.43812e-06	0.00129986
PKN1	protein kinase N1	-5.2929	-39.2031	3.73933e-06	0.00262877
APBB1	amyloid beta precursor protein binding family B member 1	-5.3326	-40.297	9.59098e-05	0.0263556
TMEM196	transmembrane protein 196	-5.4237	-42.9236	4.42194e-11	2.79778e-07
TTN	titin	-5.73154	-53.1332	9.62202e-05	0.0263649
NUDT6	nudix hydrolase 6	-6.35727	-81.984	0	0
SLC4A10	solute carrier family 4 member 10	-7.49571	-180.482	8.02994e-10	3.72576e-06
E2F8	E2F transcription factor 8	-7.7496	-215.209	3.09576e-08	6.41289e-05
SEMA3F	semaphorin 3F	-7.89916	-238.718	7.48886e-09	2.04394e-05
