# Supplementary material for: Rainbow Trout Red Blood Cells Exposed to Viral Hemorrhagic Septicemia Virus Up-Regulate Antigen-Processing Mechanisms and MHC I&II, CD86, and CD83 Antigen-presenting Cell Markers
Source: Cells. 2019 Apr 27;8(5):386. doi: 10.3390/cells8050386 (PMC6562805; doi:10.3390/cells8050386)
Supplement: Supplementary file 1 [file cells-08-00386-s001.zip › Supplementary Table S3.xlsx]

## Sheet: CYTOSCAPE PROCESSES Proteo72h
GOID	GOTerm	Ontology Source	Term PValue	Term PValue Corrected with Bonferroni step down	Group PValue	Group PValue Corrected with Bonferroni step down	GOLevels	GOGroups	% Associated Genes	Nr. Genes	Cluster	Genes Cluster #1	Genes Cluster #2	%Genes Cluster #1	%Genes Cluster #2	Associated Genes Found
R-HSA:8876725	Protein methylation	REACTOME_Pathways_20.11.2017	7.98889e-05	0.0246058	7.98889e-05	0.000239667	[-1]	Group00	26.3158	5	Specific for Cluster #2	[EEF2, ETFB]	[CALM1, HSPA8, VCP]	40	60	[CALM1, EEF2, ETFB, HSPA8, VCP]
WP:314	Fas Ligand (FasL) pathway and Stress induction of Heat Shock Proteins (HSP) regulation	WikiPathways_20.11.2017	6.99401e-05	0.0218213	6.99401e-05	0.00027976	[-1]	Group01	16.6667	7	Specific for Cluster #1	[ACTA1, ACTG1, CASP8, LMNA, SPTAN1]	[ACTB, FADD]	71.4286	28.5714	[ACTA1, ACTB, ACTG1, CASP8, FADD, LMNA, SPTAN1]
GO:0015670	carbon dioxide transport	GO_BiologicalProcess-EBI-QuickGO-GOA_20.11.2017_00h00	5.94376e-05	0.0190795	5.94376e-05	0.000297188	[5, 6]	Group02	75	3	Specific for Cluster #1	[AQP1, CA2, RHAG]	[]	100	0	[AQP1, CA2, RHAG]
GO:0022604	regulation of cell morphogenesis	GO_BiologicalProcess-EBI-QuickGO-GOA_20.11.2017_00h00	8.6042e-05	0.0261568	8.6042e-05	0.000172084	[4, 5, 6]	Group03	5.70175	26	Specific for Cluster #1	[ARHGDIA, CORO1C, DLC1, DMTN, DNM2, EPB41, EZR, FBXW8, MARK2, MYH10, MYH9, PAFAH1B1, PLAA, PTK2, RAB11A, SHROOM3, TNIK, TPM1, ZMYM4]	[ACTN4, CAPZB, CPNE9, DRAXIN, MSN, PTPRD, RDX]	73.0769	26.9231	[ACTN4, ARHGDIA, CAPZB, CORO1C, CPNE9, DLC1, DMTN, DNM2, DRAXIN, EPB41, EZR, FBXW8, MARK2, MSN, MYH10, MYH9, PAFAH1B1, PLAA, PTK2, PTPRD, RAB11A, RDX, SHROOM3, TNIK, TPM1, ZMYM4]
KEGG:04530	Tight junction	KEGG_20.11.2017	8.93566e-05	0.026807	8.93566e-05	8.93566e-05	[-1]	Group04	8.23529	14	Specific for Cluster #1	[ACTG1, EZR, HSPA4, MPDZ, MYH10, MYH9, PRKAG3, RAB8A, TJP3]	[ACTB, ACTN4, MSN, MYH8, RDX]	64.2857	35.7143	[ACTB, ACTG1, ACTN4, EZR, HSPA4, MPDZ, MSN, MYH10, MYH8, MYH9, PRKAG3, RAB8A, RDX, TJP3]
GO:0051016	barbed-end actin filament capping	GO_BiologicalProcess-EBI-QuickGO-GOA_20.11.2017_00h00	7.98889e-05	0.0246058	2.75214e-06	2.75214e-05	[7, 8, 9, 10, 11, 12, 13]	Group05	26.3158	5	Specific for Cluster #2	[ADD2, TWF1]	[CAPZB, MTPN, RDX]	40	60	[ADD2, CAPZB, MTPN, RDX, TWF1]
GO:0051693	actin filament capping	GO_BiologicalProcess-EBI-QuickGO-GOA_20.11.2017_00h00	2.75214e-06	0.00102655	2.75214e-06	2.75214e-05	[6, 7, 8, 9, 10, 11, 12]	Group05	21.6216	8	Specific for Cluster #1	[ADD2, DMTN, SPTAN1, SPTBN4, TWF1]	[CAPZB, MTPN, RDX]	62.5	37.5	[ADD2, CAPZB, DMTN, MTPN, RDX, SPTAN1, SPTBN4, TWF1]
R-HSA:15869	Metabolism of nucleotides	REACTOME_Pathways_20.11.2017	1.58369e-06	0.00060497	8.82639e-07	1.05917e-05	[-1]	Group06	12.6214	13	Specific for Cluster #2	[ADK, GLRX, NT5C2, SAMHD1]	[ADSL, ADSS, GPX1, HPRT1, LHPP, NME2, TXN, TYMP, UMPS]	30.7692	69.2308	[ADK, ADSL, ADSS, GLRX, GPX1, HPRT1, LHPP, NME2, NT5C2, SAMHD1, TXN, TYMP, UMPS]
WP:404	Nucleotide Metabolism	WikiPathways_20.11.2017	7.98889e-05	0.0246058	8.82639e-07	1.05917e-05	[-1]	Group06	26.3158	5	Specific for Cluster #2	[PRPS1]	[ADSL, ADSS, HPRT1, NME2]	20	80	[ADSL, ADSS, HPRT1, NME2, PRPS1]
R-HSA:379716	Cytosolic tRNA aminoacylation	REACTOME_Pathways_20.11.2017	2.06782e-05	0.00705127	6.99401e-05	0.00027976	[-1]	Group07	25	6	Specific for Cluster #1	[AARS, FARSB, GARS, LARS, QARS, RARS]	[]	100	0	[AARS, FARSB, GARS, LARS, QARS, RARS]
R-HSA:379724	tRNA Aminoacylation	REACTOME_Pathways_20.11.2017	6.99401e-05	0.0218213	6.99401e-05	0.00027976	[-1]	Group07	16.6667	7	Specific for Cluster #1	[AARS, FARSB, GARS, LARS, QARS, RARS, WARS2]	[]	100	0	[AARS, FARSB, GARS, LARS, QARS, RARS, WARS2]
R-HSA:447115	Interleukin-12 family signaling	REACTOME_Pathways_20.11.2017	1.36642e-05	0.00471417	7.29303e-06	6.56373e-05	[-1]	Group08	15.2542	9	None Specific Cluster	[GSTO1, HNRNPDL, HSPA9, P4HB]	[MSN, MTAP, PSME2, SOD1, TALDO1]	44.4444	55.5556	[GSTO1, HNRNPDL, HSPA9, MSN, MTAP, P4HB, PSME2, SOD1, TALDO1]
R-HSA:8950505	Gene and protein expression by JAK-STAT signaling after Interleukin-12 stimulation	REACTOME_Pathways_20.11.2017	5.13615e-06	0.00186442	7.29303e-06	6.56373e-05	[-1]	Group08	20	8	Specific for Cluster #2	[GSTO1, HNRNPDL, HSPA9]	[MSN, MTAP, PSME2, SOD1, TALDO1]	37.5	62.5	[GSTO1, HNRNPDL, HSPA9, MSN, MTAP, PSME2, SOD1, TALDO1]
GO:0035722	interleukin-12-mediated signaling pathway	GO_BiologicalProcess-EBI-QuickGO-GOA_20.11.2017_00h00	4.83517e-06	0.00176	7.29303e-06	6.56373e-05	[5, 6, 7]	Group08	15.1515	10	None Specific Cluster	[GSTO1, HNRNPDL, HSPA9, MYDGF, P4HB]	[MSN, MTAP, PSME2, SOD1, TALDO1]	50	50	[GSTO1, HNRNPDL, HSPA9, MSN, MTAP, MYDGF, P4HB, PSME2, SOD1, TALDO1]
R-HSA:1445148	Translocation of GLUT4 to the plasma membrane	REACTOME_Pathways_20.11.2017	1.05812e-07	4.25365e-05	1.95557e-09	2.73779e-08	[-1]	Group09	15.8537	13	None Specific Cluster	[ACTG1, MYH7, PRKAG3, RAB11A, RAB8A, YWHAB]	[ACTB, CALM1, MYH8, YWHAE, YWHAG, YWHAQ, YWHAZ]	46.1538	53.8462	[ACTB, ACTG1, CALM1, MYH7, MYH8, PRKAG3, RAB11A, RAB8A, YWHAB, YWHAE, YWHAG, YWHAQ, YWHAZ]
R-HSA:199991	Membrane Trafficking	REACTOME_Pathways_20.11.2017	2.9961e-10	1.36023e-07	1.95557e-09	2.73779e-08	[-1]	Group09	7.04225	45	Specific for Cluster #1	[ACTG1, AP2S1, CLTA, COPA, COPB1, COPB2, COPS7A, DNM1, DNM2, DYNC1H1, GDI2, KIF15, MYH7, PAFAH1B1, PREB, PRKAG3, RAB11A, RAB11B, RAB1A, RAB5B, RAB5C, RAB8A, RPS27A, SPTAN1, SPTBN4, TBC1D17, TBC1D8B, TSC2, UBB, YWHAB]	[ACTB, CALM1, CAPZB, CLTC, FTH1, HSPA8, MYH8, RAB1B, RAB7A, TF, UBC, YWHAE, YWHAG, YWHAQ, YWHAZ]	66.6667	33.3333	[ACTB, ACTG1, AP2S1, CALM1, CAPZB, CLTA, CLTC, COPA, COPB1, COPB2, COPS7A, DNM1, DNM2, DYNC1H1, FTH1, GDI2, HSPA8, KIF15, MYH7, MYH8, PAFAH1B1, PREB, PRKAG3, RAB11A, RAB11B, RAB1A, RAB1B, RAB5B, RAB5C, RAB7A, RAB8A, RPS27A, SPTAN1, SPTBN4, TBC1D17, TBC1D8B, TF, TSC2, UBB, UBC, YWHAB, YWHAE, YWHAG, YWHAQ, YWHAZ]
R-HSA:5653656	Vesicle-mediated transport	REACTOME_Pathways_20.11.2017	1.95557e-09	8.50671e-07	1.95557e-09	2.73779e-08	[-1]	Group09	6.63717	45	Specific for Cluster #1	[ACTG1, AP2S1, CLTA, COPA, COPB1, COPB2, COPS7A, DNM1, DNM2, DYNC1H1, GDI2, KIF15, MYH7, PAFAH1B1, PREB, PRKAG3, RAB11A, RAB11B, RAB1A, RAB5B, RAB5C, RAB8A, RPS27A, SPTAN1, SPTBN4, TBC1D17, TBC1D8B, TSC2, UBB, YWHAB]	[ACTB, CALM1, CAPZB, CLTC, FTH1, HSPA8, MYH8, RAB1B, RAB7A, TF, UBC, YWHAE, YWHAG, YWHAQ, YWHAZ]	66.6667	33.3333	[ACTB, ACTG1, AP2S1, CALM1, CAPZB, CLTA, CLTC, COPA, COPB1, COPB2, COPS7A, DNM1, DNM2, DYNC1H1, FTH1, GDI2, HSPA8, KIF15, MYH7, MYH8, PAFAH1B1, PREB, PRKAG3, RAB11A, RAB11B, RAB1A, RAB1B, RAB5B, RAB5C, RAB7A, RAB8A, RPS27A, SPTAN1, SPTBN4, TBC1D17, TBC1D8B, TF, TSC2, UBB, UBC, YWHAB, YWHAE, YWHAG, YWHAQ, YWHAZ]
R-HSA:8856828	Clathrin-mediated endocytosis	REACTOME_Pathways_20.11.2017	1.913e-06	0.000725029	1.95557e-09	2.73779e-08	[-1]	Group09	10.7914	15	Specific for Cluster #1	[ACTG1, AP2S1, CLTA, COPS7A, DNM1, DNM2, RAB5B, RAB5C, RPS27A, UBB]	[ACTB, CLTC, HSPA8, TF, UBC]	66.6667	33.3333	[ACTB, ACTG1, AP2S1, CLTA, CLTC, COPS7A, DNM1, DNM2, HSPA8, RAB5B, RAB5C, RPS27A, TF, UBB, UBC]
R-HSA:390522	Striated Muscle Contraction	REACTOME_Pathways_20.11.2017	2.46019e-05	0.00824164	1.30649e-05	9.14544e-05	[-1]	Group10	19.4444	7	Specific for Cluster #2	[ACTA1, TPM1]	[ACTN3, MYBPC1, MYH8, TPM3, TPM4]	28.5714	71.4286	[ACTA1, ACTN3, MYBPC1, MYH8, TPM1, TPM3, TPM4]
WP:383	Striated Muscle Contraction	WikiPathways_20.11.2017	2.01434e-08	8.3998e-06	1.30649e-05	9.14544e-05	[-1]	Group10	26.3158	10	Specific for Cluster #2	[ACTA1, ACTG1, TPM1]	[ACTA2, ACTN3, ACTN4, MYBPC1, MYH8, TPM3, TPM4]	30	70	[ACTA1, ACTA2, ACTG1, ACTN3, ACTN4, MYBPC1, MYH8, TPM1, TPM3, TPM4]
GO:0030048	actin filament-based movement	GO_BiologicalProcess-EBI-QuickGO-GOA_20.11.2017_00h00	0.000147167	0.0419425	1.30649e-05	9.14544e-05	[3]	Group10	8.82353	12	None Specific Cluster	[ACTA1, MYH10, MYH7, MYH9, TPM1]	[ACTN3, ACTN4, ATP1A3, MYBPC1, MYH8, TPM3, TPM4]	41.6667	58.3333	[ACTA1, ACTN3, ACTN4, ATP1A3, MYBPC1, MYH10, MYH7, MYH8, MYH9, TPM1, TPM3, TPM4]
GO:0030049	muscle filament sliding	GO_BiologicalProcess-EBI-QuickGO-GOA_20.11.2017_00h00	4.19915e-06	0.00153269	1.30649e-05	9.14544e-05	[5, 6]	Group10	20.5128	8	Specific for Cluster #2	[ACTA1, MYH7, TPM1]	[ACTN3, MYBPC1, MYH8, TPM3, TPM4]	37.5	62.5	[ACTA1, ACTN3, MYBPC1, MYH7, MYH8, TPM1, TPM3, TPM4]
R-HSA:72165	mRNA Splicing - Minor Pathway	REACTOME_Pathways_20.11.2017	3.8744e-05	0.0126306	9.30573e-10	1.39586e-08	[-1]	Group11	15.3846	8	Specific for Cluster #1	[NCBP1, SNRNP200, SNRPG, SNU13, SRSF6]	[SNRPD3, SRSF1, SRSF2]	62.5	37.5	[NCBP1, SNRNP200, SNRPD3, SNRPG, SNU13, SRSF1, SRSF2, SRSF6]
GO:0022613	ribonucleoprotein complex biogenesis	GO_BiologicalProcess-EBI-QuickGO-GOA_20.11.2017_00h00	2.69295e-08	1.11488e-05	9.30573e-10	1.39586e-08	[3]	Group11	7.08502	35	Specific for Cluster #1	[AGO1, AGO3, CIRBP, DYNC1H1, EIF2S1, EIF4H, MMAB, NCBP1, NOP2, RBMX, RPL12, RPL13, RPL7, RPL9, RPS11, RPS12, RPS20, RPS24, RPS27A, RSL1D1, SART3, SNRNP200, SNRPG, SNU13, SRSF6]	[AGO2, BOP1, LSM4, PATL1, RAN, RPL22, RPL4, RPS18, SNRPD3, SRSF1]	71.4286	28.5714	[AGO1, AGO2, AGO3, BOP1, CIRBP, DYNC1H1, EIF2S1, EIF4H, LSM4, MMAB, NCBP1, NOP2, PATL1, RAN, RBMX, RPL12, RPL13, RPL22, RPL4, RPL7, RPL9, RPS11, RPS12, RPS18, RPS20, RPS24, RPS27A, RSL1D1, SART3, SNRNP200, SNRPD3, SNRPG, SNU13, SRSF1, SRSF6]
GO:0022618	ribonucleoprotein complex assembly	GO_BiologicalProcess-EBI-QuickGO-GOA_20.11.2017_00h00	4.02654e-08	1.64685e-05	9.30573e-10	1.39586e-08	[4, 5, 6]	Group11	9.86547	22	Specific for Cluster #1	[AGO1, AGO3, CIRBP, DYNC1H1, EIF2S1, EIF4H, MMAB, NCBP1, NOP2, RBMX, RPL12, SART3, SNRNP200, SNRPG, SNU13, SRSF6]	[AGO2, BOP1, LSM4, PATL1, SNRPD3, SRSF1]	72.7273	27.2727	[AGO1, AGO2, AGO3, BOP1, CIRBP, DYNC1H1, EIF2S1, EIF4H, LSM4, MMAB, NCBP1, NOP2, PATL1, RBMX, RPL12, SART3, SNRNP200, SNRPD3, SNRPG, SNU13, SRSF1, SRSF6]
GO:0034622	cellular macromolecular complex assembly	GO_BiologicalProcess-EBI-QuickGO-GOA_20.11.2017_00h00	5.72463e-09	2.43869e-06	9.30573e-10	1.39586e-08	[5]	Group11	5.53991	59	Specific for Cluster #1	[ADD2, AGO1, AGO3, AP2S1, CIRBP, CLIP1, CLTA, DDB1, DMTN, DNM1, DNM2, DYNC1H1, EIF2S1, EIF4H, GARS, HP1BP3, HSPA1A, HSPA4, MMAB, MX1, NAP1L1, NCBP1, NOP2, PSMC2, PSMD13, PSMD4, PTK2, PYCARD, RAB1A, RBMX, RPL12, RPS27A, SART3, SNRNP200, SNRPG, SNU13, SPTAN1, SPTBN4, SRSF6, TBCA, TWF1, UBB, VDAC2]	[AGO2, ANP32B, ANP32E, BOP1, CAPZB, CLTC, DNAJB12, LSM4, MTPN, MYBPC1, PATL1, RAD23B, RDX, SNRPD3, SRSF1, UBC]	72.8814	27.1186	[ADD2, AGO1, AGO2, AGO3, ANP32B, ANP32E, AP2S1, BOP1, CAPZB, CIRBP, CLIP1, CLTA, CLTC, DDB1, DMTN, DNAJB12, DNM1, DNM2, DYNC1H1, EIF2S1, EIF4H, GARS, HP1BP3, HSPA1A, HSPA4, LSM4, MMAB, MTPN, MX1, MYBPC1, NAP1L1, NCBP1, NOP2, PATL1, PSMC2, PSMD13, PSMD4, PTK2, PYCARD, RAB1A, RAD23B, RBMX, RDX, RPL12, RPS27A, SART3, SNRNP200, SNRPD3, SNRPG, SNU13, SPTAN1, SPTBN4, SRSF1, SRSF6, TBCA, TWF1, UBB, UBC,…
GO:0000245	spliceosomal complex assembly	GO_BiologicalProcess-EBI-QuickGO-GOA_20.11.2017_00h00	8.66742e-05	0.0261756	9.30573e-10	1.39586e-08	[5, 6, 7, 8, 9, 10, 11, 12]	Group11	13.7931	8	Specific for Cluster #1	[NCBP1, RBMX, SNRNP200, SNRPG, SRSF6]	[LSM4, SNRPD3, SRSF1]	62.5	37.5	[LSM4, NCBP1, RBMX, SNRNP200, SNRPD3, SNRPG, SRSF1, SRSF6]
GO:0008637	apoptotic mitochondrial changes	GO_BiologicalProcess-EBI-QuickGO-GOA_20.11.2017_00h00	2.92013e-05	0.00969483	9.94357e-07	1.09379e-05	[5]	Group12	9.70149	13	Specific for Cluster #1	[ACAA2, CASP8, GCLC, HSPA1A, LMNA, PDCD5, PYCARD, YWHAB]	[GPX1, YWHAE, YWHAG, YWHAQ, YWHAZ]	61.5385	38.4615	[ACAA2, CASP8, GCLC, GPX1, HSPA1A, LMNA, PDCD5, PYCARD, YWHAB, YWHAE, YWHAG, YWHAQ, YWHAZ]
GO:0010821	regulation of mitochondrion organization	GO_BiologicalProcess-EBI-QuickGO-GOA_20.11.2017_00h00	4.02938e-06	0.00147475	9.94357e-07	1.09379e-05	[5, 6]	Group12	8.06452	20	Specific for Cluster #1	[ACAA2, CASP8, HSPA1A, HUWE1, LMNA, NPEPPS, PDCD5, PYCARD, SQSTM1, TSC2, UBE2L3, VDAC1, YWHAB]	[GPX1, HSPA1L, MYBPC1, YWHAE, YWHAG, YWHAQ, YWHAZ]	65	35	[ACAA2, CASP8, GPX1, HSPA1A, HSPA1L, HUWE1, LMNA, MYBPC1, NPEPPS, PDCD5, PYCARD, SQSTM1, TSC2, UBE2L3, VDAC1, YWHAB, YWHAE, YWHAG, YWHAQ, YWHAZ]
GO:1903201	regulation of oxidative stress-induced cell death	GO_BiologicalProcess-EBI-QuickGO-GOA_20.11.2017_00h00	7.7733e-05	0.0240195	9.94357e-07	1.09379e-05	[4, 5, 6, 7]	Group12	12.3288	9	None Specific Cluster	[NONO, P4HB, RACK1, SFPQ]	[GPX1, NME5, SOD1, TGFBRAP1, TXN]	44.4444	55.5556	[GPX1, NME5, NONO, P4HB, RACK1, SFPQ, SOD1, TGFBRAP1, TXN]
GO:2001233	regulation of apoptotic signaling pathway	GO_BiologicalProcess-EBI-QuickGO-GOA_20.11.2017_00h00	2.38358e-06	0.000891458	9.94357e-07	1.09379e-05	[4, 5, 6, 7]	Group12	6.65083	28	Specific for Cluster #1	[ACAA2, CASP8, ETFB, GCLC, HNRNPK, HSPA1A, LMNA, NONO, P4HB, PDCD5, PYCARD, QARS, RACK1, SFPQ, TPT1, UBB, VDAC2, YWHAB]	[FADD, GPX1, NME5, SOD1, TGFBRAP1, WFS1, YWHAE, YWHAG, YWHAQ, YWHAZ]	64.2857	35.7143	[ACAA2, CASP8, ETFB, FADD, GCLC, GPX1, HNRNPK, HSPA1A, LMNA, NME5, NONO, P4HB, PDCD5, PYCARD, QARS, RACK1, SFPQ, SOD1, TGFBRAP1, TPT1, UBB, VDAC2, WFS1, YWHAB, YWHAE, YWHAG, YWHAQ, YWHAZ]
GO:2001242	regulation of intrinsic apoptotic signaling pathway	GO_BiologicalProcess-EBI-QuickGO-GOA_20.11.2017_00h00	2.25683e-05	0.00765064	9.94357e-07	1.09379e-05	[5, 6, 7, 8]	Group12	8.82353	15	Specific for Cluster #1	[HNRNPK, HSPA1A, NONO, P4HB, PYCARD, RACK1, SFPQ, TPT1, UBB, VDAC2]	[GPX1, NME5, SOD1, TGFBRAP1, WFS1]	66.6667	33.3333	[GPX1, HNRNPK, HSPA1A, NME5, NONO, P4HB, PYCARD, RACK1, SFPQ, SOD1, TGFBRAP1, TPT1, UBB, VDAC2, WFS1]
GO:1901028	regulation of mitochondrial outer membrane permeabilization involved in apoptotic signaling pathway	GO_BiologicalProcess-EBI-QuickGO-GOA_20.11.2017_00h00	2.88643e-05	0.00964068	9.94357e-07	1.09379e-05	[5, 6, 7, 8, 9, 10, 11]	Group12	16	8	None Specific Cluster	[ACAA2, CASP8, HSPA1A, YWHAB]	[YWHAE, YWHAG, YWHAQ, YWHAZ]	50	50	[ACAA2, CASP8, HSPA1A, YWHAB, YWHAE, YWHAG, YWHAQ, YWHAZ]
KEGG:04144	Endocytosis	KEGG_20.11.2017	1.15652e-05	0.00402469	1.59709e-07	2.07621e-06	[-1]	Group13	7.78689	19	Specific for Cluster #1	[AP2S1, CLTA, DNM1, DNM2, HSPA1A, HSPA2, RAB11A, RAB11B, RAB5B, RAB5C, RAB8A, UBB]	[CAPZB, CLTC, HLA-A, HSPA1L, HSPA6, HSPA8, RAB7A]	63.1579	36.8421	[AP2S1, CAPZB, CLTA, CLTC, DNM1, DNM2, HLA-A, HSPA1A, HSPA1L, HSPA2, HSPA6, HSPA8, RAB11A, RAB11B, RAB5B, RAB5C, RAB7A, RAB8A, UBB]
KEGG:04961	Endocrine and other factor-regulated calcium reabsorption	KEGG_20.11.2017	1.92779e-06	0.000728704	1.59709e-07	2.07621e-06	[-1]	Group13	19.1489	9	Specific for Cluster #1	[AP2S1, ATP1B1, CLTA, DNM1, DNM2, RAB11A]	[ATP1A3, CLTC, PLCB4]	66.6667	33.3333	[AP2S1, ATP1A3, ATP1B1, CLTA, CLTC, DNM1, DNM2, PLCB4, RAB11A]
R-HSA:177504	Retrograde neurotrophin signalling	REACTOME_Pathways_20.11.2017	1.52404e-05	0.0052427	1.59709e-07	2.07621e-06	[-1]	Group13	35.7143	5	Specific for Cluster #1	[AP2S1, CLTA, DNM1, DNM2]	[CLTC]	80	20	[AP2S1, CLTA, CLTC, DNM1, DNM2]
R-HSA:8854214	TBC/RABGAPs	REACTOME_Pathways_20.11.2017	1.5299e-05	0.00524755	1.59709e-07	2.07621e-06	[-1]	Group13	17.3913	8	Specific for Cluster #1	[RAB11A, RAB11B, RAB5B, RAB5C, RAB8A, TBC1D17, TSC2]	[RAB7A]	87.5	12.5	[RAB11A, RAB11B, RAB5B, RAB5C, RAB7A, RAB8A, TBC1D17, TSC2]
R-HSA:8856828	Clathrin-mediated endocytosis	REACTOME_Pathways_20.11.2017	1.913e-06	0.000725029	1.59709e-07	2.07621e-06	[-1]	Group13	10.7914	15	Specific for Cluster #1	[ACTG1, AP2S1, CLTA, COPS7A, DNM1, DNM2, RAB5B, RAB5C, RPS27A, UBB]	[ACTB, CLTC, HSPA8, TF, UBC]	66.6667	33.3333	[ACTB, ACTG1, AP2S1, CLTA, CLTC, COPS7A, DNM1, DNM2, HSPA8, RAB5B, RAB5C, RPS27A, TF, UBB, UBC]
R-HSA:8873719	RAB geranylgeranylation	REACTOME_Pathways_20.11.2017	0.000175823	0.0490547	1.59709e-07	2.07621e-06	[-1]	Group13	12.5	8	Specific for Cluster #1	[RAB11A, RAB11B, RAB1A, RAB5B, RAB5C, RAB8A]	[RAB1B, RAB7A]	75	25	[RAB11A, RAB11B, RAB1A, RAB1B, RAB5B, RAB5C, RAB7A, RAB8A]
R-HSA:9007101	Rab regulation of trafficking	REACTOME_Pathways_20.11.2017	6.03388e-05	0.0193084	1.59709e-07	2.07621e-06	[-1]	Group13	9.67742	12	Specific for Cluster #1	[GDI2, RAB11A, RAB11B, RAB1A, RAB5B, RAB5C, RAB8A, TBC1D17, TSC2]	[RAB1B, RAB7A, YWHAE]	75	25	[GDI2, RAB11A, RAB11B, RAB1A, RAB1B, RAB5B, RAB5C, RAB7A, RAB8A, TBC1D17, TSC2, YWHAE]
KEGG:00860	Porphyrin and chlorophyll metabolism	KEGG_20.11.2017	6.99401e-05	0.0218213	5.77001e-05	0.000346201	[-1]	Group14	16.6667	7	Specific for Cluster #1	[BLVRA, CPOX, HMBS, MMAB, UROD]	[ALAD, BLVRB]	71.4286	28.5714	[ALAD, BLVRA, BLVRB, CPOX, HMBS, MMAB, UROD]
R-HSA:189445	Metabolism of porphyrins	REACTOME_Pathways_20.11.2017	2.20353e-06	0.000826323	5.77001e-05	0.000346201	[-1]	Group14	35.2941	6	Specific for Cluster #1	[BLVRA, CPOX, HMBS, UROD]	[ALAD, BLVRB]	66.6667	33.3333	[ALAD, BLVRA, BLVRB, CPOX, HMBS, UROD]
R-HSA:189451	Heme biosynthesis	REACTOME_Pathways_20.11.2017	0.000107115	0.0315989	5.77001e-05	0.000346201	[-1]	Group14	36.3636	4	Specific for Cluster #1	[CPOX, HMBS, UROD]	[ALAD]	75	25	[ALAD, CPOX, HMBS, UROD]
WP:561	Heme Biosynthesis	WikiPathways_20.11.2017	4.25477e-05	0.013828	5.77001e-05	0.000346201	[-1]	Group14	44.4444	4	Specific for Cluster #1	[CPOX, HMBS, UROD]	[ALAD]	75	25	[ALAD, CPOX, HMBS, UROD]
GO:0033013	tetrapyrrole metabolic process	GO_BiologicalProcess-EBI-QuickGO-GOA_20.11.2017_00h00	3.62829e-06	0.00133884	5.77001e-05	0.000346201	[4]	Group14	15.625	10	Specific for Cluster #1	[BLVRA, CPOX, HMBS, MMAB, PRSS1, PRSS3, TMEM14C, UROD]	[ALAD, BLVRB]	80	20	[ALAD, BLVRA, BLVRB, CPOX, HMBS, MMAB, PRSS1, PRSS3, TMEM14C, UROD]
GO:0042168	heme metabolic process	GO_BiologicalProcess-EBI-QuickGO-GOA_20.11.2017_00h00	6.82253e-06	0.00243564	5.77001e-05	0.000346201	[3, 5, 6]	Group14	23.3333	7	Specific for Cluster #1	[BLVRA, CPOX, HMBS, TMEM14C, UROD]	[ALAD, BLVRB]	71.4286	28.5714	[ALAD, BLVRA, BLVRB, CPOX, HMBS, TMEM14C, UROD]
GO:0033014	tetrapyrrole biosynthetic process	GO_BiologicalProcess-EBI-QuickGO-GOA_20.11.2017_00h00	6.56987e-05	0.0206951	5.77001e-05	0.000346201	[5]	Group14	20.6897	6	Specific for Cluster #1	[CPOX, HMBS, MMAB, TMEM14C, UROD]	[ALAD]	83.3333	16.6667	[ALAD, CPOX, HMBS, MMAB, TMEM14C, UROD]
GO:0006783	heme biosynthetic process	GO_BiologicalProcess-EBI-QuickGO-GOA_20.11.2017_00h00	0.000134196	0.0387827	5.77001e-05	0.000346201	[4, 6, 7]	Group14	23.8095	5	Specific for Cluster #1	[CPOX, HMBS, TMEM14C, UROD]	[ALAD]	80	20	[ALAD, CPOX, HMBS, TMEM14C, UROD]
R-HSA:5663205	Infectious disease	REACTOME_Pathways_20.11.2017	6.46736e-16	3.52471e-13	2.13772e-22	4.27544e-21	[-1]	Group15	10.2273	45	None Specific Cluster	[AP2S1, CLTA, EEF2, HSPA1A, KPNA4, NCBP1, PSMB3, PSMB6, PSMC2, PSMD13, PSMD2, PSMD4, PSME1, RANBP1, RPL12, RPL13, RPL7, RPL9, RPS11, RPS12, RPS20, RPS24, RPS27A, SSRP1, UBB]	[BANF1, CALM1, CLTC, NUP210, PSMA1, PSMA2, PSMA3, PSMA4, PSMA5, PSMA6, PSMA8, PSMB1, PSMB2, PSMB4, PSME2, RAN, RPL22, RPL4, RPS18, UBC]	55.5556	44.4444	[AP2S1, BANF1, CALM1, CLTA, CLTC, EEF2, HSPA1A, KPNA4, NCBP1, NUP210, PSMA1, PSMA2, PSMA3, PSMA4, PSMA5, PSMA6, PSMA8, PSMB1, PSMB2, PSMB3, PSMB4, PSMB6, PSMC2, PSMD13, PSMD2, PSMD4, PSME1, PSME2, RAN, RANBP1, RPL12, RPL13, RPL22, RPL4, RPL7, RPL9, RPS11, RPS12, RPS18, RPS20, RPS24, RPS27A, SSRP1, UBB, UBC]
GO:0044403	symbiosis, encompassing mutualism through parasitism	GO_BiologicalProcess-EBI-QuickGO-GOA_20.11.2017_00h00	2.09039e-17	1.19152e-14	2.13772e-22	4.27544e-21	[3]	Group15	7.75281	69	Specific for Cluster #1	[ALYREF, AP2S1, AQP1, CASP8, CBX5, COPB1, DDB1, EIF4A1, EIF4A2, EIF4H, HNRNPK, HSPA1A, IL16, ILF3, KPNA4, LARP1, MPDZ, MX1, P4HB, PSMB3, PSMB6, PSMC2, RAB1A, RACK1, RAD23A, RANBP1, RPL12, RPL13, RPL7, RPL9, RPS11, RPS12, RPS20, RPS24, RPS27A, SQSTM1, TARDBP, TOP1, TRIM21, TRIM35, TSC2, UBB, VDAC1, YWHAB]	[BANF1, CD209, FADD, GAPDH, GPX1, HLA-A, HNRNPA1, HSPA8, LGALS1, NUP210, PSMA3, PSMA4, PSMB1, PSMB2, PSMB4, RAB1B, RAB7A, RAN, RPL22, RPL4, RPS18, TRIM62, UBC, VCP, YWHAE]	63.7681	36.2319	[ALYREF, AP2S1, AQP1, BANF1, CASP8, CBX5, CD209, COPB1, DDB1, EIF4A1, EIF4A2, EIF4H, FADD, GAPDH, GPX1, HLA-A, HNRNPA1, HNRNPK, HSPA1A, HSPA8, IL16, ILF3, KPNA4, LARP1, LGALS1, MPDZ, MX1, NUP210, P4HB, PSMA3, PSMA4, PSMB1, PSMB2, PSMB3, PSMB4, PSMB6, PSMC2, RAB1A, RAB1B, RAB7A, RACK1, RAD23A, RAN, RANBP1, RPL12, RPL13, RPL22, RPL4, RPL7, RPL9, RPS11, RPS12, RPS18, RPS20, RPS24, RPS27A, SQSTM1, TA…
GO:0044766	multi-organism transport	GO_BiologicalProcess-EBI-QuickGO-GOA_20.11.2017_00h00	0.000130929	0.0379695	2.13772e-22	4.27544e-21	[3, 4]	Group15	11.5385	9	None Specific Cluster	[ALYREF, KPNA4, RPS27A, UBB]	[CD209, NUP210, RAB7A, RAN, UBC]	44.4444	55.5556	[ALYREF, CD209, KPNA4, NUP210, RAB7A, RAN, RPS27A, UBB, UBC]
GO:0051701	interaction with host	GO_BiologicalProcess-EBI-QuickGO-GOA_20.11.2017_00h00	0.000147424	0.0418685	2.13772e-22	4.27544e-21	[3, 4]	Group15	7.17489	16	Specific for Cluster #1	[ALYREF, CASP8, DDB1, HSPA1A, KPNA4, P4HB, RPS27A, TRIM21, TRIM35, UBB]	[CD209, GAPDH, LGALS1, RAB7A, TRIM62, UBC]	62.5	37.5	[ALYREF, CASP8, CD209, DDB1, GAPDH, HSPA1A, KPNA4, LGALS1, P4HB, RAB7A, RPS27A, TRIM21, TRIM35, TRIM62, UBB, UBC]
GO:0016032	viral process	GO_BiologicalProcess-EBI-QuickGO-GOA_20.11.2017_00h00	6.73133e-17	3.77628e-14	2.13772e-22	4.27544e-21	[4]	Group15	7.92683	65	Specific for Cluster #1	[ALYREF, AP2S1, CASP8, CBX5, COPB1, DDB1, EIF4A1, EIF4A2, EIF4H, HNRNPK, HSPA1A, IL16, ILF3, KPNA4, LARP1, MPDZ, MX1, P4HB, PSMB3, PSMB6, PSMC2, RAB1A, RACK1, RAD23A, RANBP1, RPL12, RPL13, RPL7, RPL9, RPS11, RPS12, RPS20, RPS24, RPS27A, TARDBP, TOP1, TRIM21, TRIM35, TSC2, UBB, VDAC1, YWHAB]	[BANF1, CD209, FADD, HLA-A, HNRNPA1, HSPA8, LGALS1, NUP210, PSMA3, PSMA4, PSMB1, PSMB2, PSMB4, RAB1B, RAB7A, RAN, RPL22, RPL4, RPS18, TRIM62, UBC, VCP, YWHAE]	64.6154	35.3846	[ALYREF, AP2S1, BANF1, CASP8, CBX5, CD209, COPB1, DDB1, EIF4A1, EIF4A2, EIF4H, FADD, HLA-A, HNRNPA1, HNRNPK, HSPA1A, HSPA8, IL16, ILF3, KPNA4, LARP1, LGALS1, MPDZ, MX1, NUP210, P4HB, PSMA3, PSMA4, PSMB1, PSMB2, PSMB3, PSMB4, PSMB6, PSMC2, RAB1A, RAB1B, RAB7A, RACK1, RAD23A, RAN, RANBP1, RPL12, RPL13, RPL22, RPL4, RPL7, RPL9, RPS11, RPS12, RPS18, RPS20, RPS24, RPS27A, TARDBP, TOP1, TRIM21, TRIM35,…
GO:0034655	nucleobase-containing compound catabolic process	GO_BiologicalProcess-EBI-QuickGO-GOA_20.11.2017_00h00	7.48236e-22	4.59417e-19	2.13772e-22	4.27544e-21	[4, 5]	Group15	11.0057	58	None Specific Cluster	[AGO1, AGO3, CIRBP, EIF4A1, EIF4A2, HNRNPR, HSPA1A, KHSRP, LARP1, NCBP1, NT5C2, PSMB3, PSMB6, PSMC2, PSMD13, PSMD2, PSMD4, PSME1, RACK1, RBM8A, RPL12, RPL13, RPL7, RPL9, RPS11, RPS12, RPS20, RPS24, RPS27A, SAMHD1, TARDBP, UBB, YWHAB]	[AGO2, GPX1, HPRT1, HSPA8, LSM1, LSM4, PATL1, PSMA1, PSMA2, PSMA3, PSMA4, PSMA5, PSMA6, PSMA8, PSMB1, PSMB2, PSMB4, PSME2, RPL22, RPL4, RPS18, TYMP, UBC, VCP, YWHAZ]	56.8966	43.1034	[AGO1, AGO2, AGO3, CIRBP, EIF4A1, EIF4A2, GPX1, HNRNPR, HPRT1, HSPA1A, HSPA8, KHSRP, LARP1, LSM1, LSM4, NCBP1, NT5C2, PATL1, PSMA1, PSMA2, PSMA3, PSMA4, PSMA5, PSMA6, PSMA8, PSMB1, PSMB2, PSMB3, PSMB4, PSMB6, PSMC2, PSMD13, PSMD2, PSMD4, PSME1, PSME2, RACK1, RBM8A, RPL12, RPL13, RPL22, RPL4, RPL7, RPL9, RPS11, RPS12, RPS18, RPS20, RPS24, RPS27A, SAMHD1, TARDBP, TYMP, UBB, UBC, VCP, YWHAB, YWHAZ]
GO:0019058	viral life cycle	GO_BiologicalProcess-EBI-QuickGO-GOA_20.11.2017_00h00	1.79911e-06	0.000683661	2.13772e-22	4.27544e-21	[5]	Group15	7.45342	24	None Specific Cluster	[DDB1, HSPA1A, ILF3, KPNA4, LARP1, MX1, P4HB, RAB1A, RAD23A, RPS27A, TRIM21, TRIM35, UBB]	[BANF1, CD209, HSPA8, LGALS1, NUP210, RAB1B, RAB7A, RAN, TRIM62, UBC, VCP]	54.1667	45.8333	[BANF1, CD209, DDB1, HSPA1A, HSPA8, ILF3, KPNA4, LARP1, LGALS1, MX1, NUP210, P4HB, RAB1A, RAB1B, RAB7A, RAD23A, RAN, RPS27A, TRIM21, TRIM35, TRIM62, UBB, UBC, VCP]
GO:0006402	mRNA catabolic process	GO_BiologicalProcess-EBI-QuickGO-GOA_20.11.2017_00h00	2.23011e-24	1.38044e-21	2.13772e-22	4.27544e-21	[5, 6, 7, 8]	Group15	14.2458	51	None Specific Cluster	[AGO1, AGO3, CIRBP, EIF4A1, EIF4A2, HNRNPR, HSPA1A, KHSRP, LARP1, NCBP1, PSMB3, PSMB6, PSMC2, PSMD13, PSMD2, PSMD4, PSME1, RBM8A, RPL12, RPL13, RPL7, RPL9, RPS11, RPS12, RPS20, RPS24, RPS27A, TARDBP, UBB, YWHAB]	[AGO2, HSPA8, LSM1, LSM4, PATL1, PSMA1, PSMA2, PSMA3, PSMA4, PSMA5, PSMA6, PSMA8, PSMB1, PSMB2, PSMB4, PSME2, RPL22, RPL4, RPS18, UBC, YWHAZ]	58.8235	41.1765	[AGO1, AGO2, AGO3, CIRBP, EIF4A1, EIF4A2, HNRNPR, HSPA1A, HSPA8, KHSRP, LARP1, LSM1, LSM4, NCBP1, PATL1, PSMA1, PSMA2, PSMA3, PSMA4, PSMA5, PSMA6, PSMA8, PSMB1, PSMB2, PSMB3, PSMB4, PSMB6, PSMC2, PSMD13, PSMD2, PSMD4, PSME1, PSME2, RBM8A, RPL12, RPL13, RPL22, RPL4, RPL7, RPL9, RPS11, RPS12, RPS18, RPS20, RPS24, RPS27A, TARDBP, UBB, UBC, YWHAB, YWHAZ]
KEGG:00030	Pentose phosphate pathway	KEGG_20.11.2017	8.04178e-05	0.0246883	8.08537e-06	6.4683e-05	[-1]	Group16	20	6	None Specific Cluster	[G6PD, PRPS1, TKTL2]	[RPIA, TALDO1, TKT]	50	50	[G6PD, PRPS1, RPIA, TALDO1, TKT, TKTL2]
R-HSA:71336	Pentose phosphate pathway (hexose monophosphate shunt)	REACTOME_Pathways_20.11.2017	2.23958e-05	0.00761458	8.08537e-06	6.4683e-05	[-1]	Group16	33.3333	5	Specific for Cluster #2	[G6PD, PRPS1]	[RPIA, TALDO1, TKT]	40	60	[G6PD, PRPS1, RPIA, TALDO1, TKT]
R-HSA:71387	Metabolism of carbohydrates	REACTOME_Pathways_20.11.2017	5.74555e-05	0.0185007	8.08537e-06	6.4683e-05	[-1]	Group16	6.93431	19	None Specific Cluster	[AKR1A1, CRYL1, G6PD, MDH1, PRPS1, RPS27A, TPI1, UBB]	[AGRN, CALM1, GAPDH, GAPDHS, NUP210, PGAM1, PRELP, RPIA, TALDO1, TKT, UBC]	42.1053	57.8947	[AGRN, AKR1A1, CALM1, CRYL1, G6PD, GAPDH, GAPDHS, MDH1, NUP210, PGAM1, PRELP, PRPS1, RPIA, RPS27A, TALDO1, TKT, TPI1, UBB, UBC]
WP:134	Pentose Phosphate Pathway	WikiPathways_20.11.2017	1.22962e-05	0.00426679	8.08537e-06	6.4683e-05	[-1]	Group16	57.1429	4	Specific for Cluster #2	[G6PD]	[RPIA, TALDO1, TKT]	25	75	[G6PD, RPIA, TALDO1, TKT]
WP:1946	Cori Cycle	WikiPathways_20.11.2017	3.19138e-05	0.0105316	8.08537e-06	6.4683e-05	[-1]	Group16	31.25	5	Specific for Cluster #2	[G6PD, TPI1]	[GAPDH, PGAM1, TALDO1]	40	60	[G6PD, GAPDH, PGAM1, TALDO1, TPI1]
GO:0046364	monosaccharide biosynthetic process	GO_BiologicalProcess-EBI-QuickGO-GOA_20.11.2017_00h00	8.3186e-05	0.0253717	8.08537e-06	6.4683e-05	[4, 5]	Group16	10.0917	11	None Specific Cluster	[AKR1A1, G6PD, KHSRP, MDH1, TPI1]	[GAPDH, GAPDHS, LEPR, PGAM1, TALDO1, TKT]	45.4545	54.5455	[AKR1A1, G6PD, GAPDH, GAPDHS, KHSRP, LEPR, MDH1, PGAM1, TALDO1, TKT, TPI1]
GO:0046496	nicotinamide nucleotide metabolic process	GO_BiologicalProcess-EBI-QuickGO-GOA_20.11.2017_00h00	3.38252e-05	0.0111285	8.08537e-06	6.4683e-05	[6, 7, 8, 9]	Group16	8.12183	16	None Specific Cluster	[G6PD, LDHB, MDH1, NAMPT, NNT, PTGIS, TPI1]	[ACTN3, GAPDH, GAPDHS, NUP210, PGAM1, RPIA, TALDO1, TKT, VCP]	43.75	56.25	[ACTN3, G6PD, GAPDH, GAPDHS, LDHB, MDH1, NAMPT, NNT, NUP210, PGAM1, PTGIS, RPIA, TALDO1, TKT, TPI1, VCP]
GO:0006739	NADP metabolic process	GO_BiologicalProcess-EBI-QuickGO-GOA_20.11.2017_00h00	0.00012741	0.0372037	8.08537e-06	6.4683e-05	[7, 8, 9, 10]	Group16	15.2174	7	None Specific Cluster	[G6PD, NNT, TPI1]	[PGAM1, RPIA, TALDO1, TKT]	42.8571	57.1429	[G6PD, NNT, PGAM1, RPIA, TALDO1, TKT, TPI1]
GO:0019674	NAD metabolic process	GO_BiologicalProcess-EBI-QuickGO-GOA_20.11.2017_00h00	3.44445e-05	0.0112978	8.08537e-06	6.4683e-05	[7, 8, 9, 10]	Group16	12.1951	10	None Specific Cluster	[LDHB, MDH1, NAMPT, PTGIS, TPI1]	[ACTN3, GAPDH, GAPDHS, PGAM1, VCP]	50	50	[ACTN3, GAPDH, GAPDHS, LDHB, MDH1, NAMPT, PGAM1, PTGIS, TPI1, VCP]
GO:0006734	NADH metabolic process	GO_BiologicalProcess-EBI-QuickGO-GOA_20.11.2017_00h00	0.000167953	0.0471947	8.08537e-06	6.4683e-05	[8, 9, 10, 11]	Group16	14.5833	7	Specific for Cluster #2	[MDH1, TPI1]	[ACTN3, GAPDH, GAPDHS, PGAM1, VCP]	28.5714	71.4286	[ACTN3, GAPDH, GAPDHS, MDH1, PGAM1, TPI1, VCP]
KEGG:04144	Endocytosis	KEGG_20.11.2017	1.15652e-05	0.00402469	1.02083e-11	1.73541e-10	[-1]	Group17	7.78689	19	Specific for Cluster #1	[AP2S1, CLTA, DNM1, DNM2, HSPA1A, HSPA2, RAB11A, RAB11B, RAB5B, RAB5C, RAB8A, UBB]	[CAPZB, CLTC, HLA-A, HSPA1L, HSPA6, HSPA8, RAB7A]	63.1579	36.8421	[AP2S1, CAPZB, CLTA, CLTC, DNM1, DNM2, HLA-A, HSPA1A, HSPA1L, HSPA2, HSPA6, HSPA8, RAB11A, RAB11B, RAB5B, RAB5C, RAB7A, RAB8A, UBB]
KEGG:04961	Endocrine and other factor-regulated calcium reabsorption	KEGG_20.11.2017	1.92779e-06	0.000728704	1.02083e-11	1.73541e-10	[-1]	Group17	19.1489	9	Specific for Cluster #1	[AP2S1, ATP1B1, CLTA, DNM1, DNM2, RAB11A]	[ATP1A3, CLTC, PLCB4]	66.6667	33.3333	[AP2S1, ATP1A3, ATP1B1, CLTA, CLTC, DNM1, DNM2, PLCB4, RAB11A]
KEGG:05100	Bacterial invasion of epithelial cells	KEGG_20.11.2017	0.000106844	0.0316259	1.02083e-11	1.73541e-10	[-1]	Group17	11.8421	9	Specific for Cluster #1	[ACTG1, CD2AP, CLTA, DNM1, DNM2, PTK2, SEPT8]	[ACTB, CLTC]	77.7778	22.2222	[ACTB, ACTG1, CD2AP, CLTA, CLTC, DNM1, DNM2, PTK2, SEPT8]
R-HSA:177504	Retrograde neurotrophin signalling	REACTOME_Pathways_20.11.2017	1.52404e-05	0.0052427	1.02083e-11	1.73541e-10	[-1]	Group17	35.7143	5	Specific for Cluster #1	[AP2S1, CLTA, DNM1, DNM2]	[CLTC]	80	20	[AP2S1, CLTA, CLTC, DNM1, DNM2]
R-HSA:190873	Gap junction degradation	REACTOME_Pathways_20.11.2017	1.82845e-07	7.25893e-05	1.02083e-11	1.73541e-10	[-1]	Group17	50	6	Specific for Cluster #1	[ACTG1, CLTA, DNM1, DNM2]	[ACTB, CLTC]	66.6667	33.3333	[ACTB, ACTG1, CLTA, CLTC, DNM1, DNM2]
R-HSA:196025	Formation of annular gap junctions	REACTOME_Pathways_20.11.2017	9.33766e-08	3.76308e-05	1.02083e-11	1.73541e-10	[-1]	Group17	54.5455	6	Specific for Cluster #1	[ACTG1, CLTA, DNM1, DNM2]	[ACTB, CLTC]	66.6667	33.3333	[ACTB, ACTG1, CLTA, CLTC, DNM1, DNM2]
R-HSA:199991	Membrane Trafficking	REACTOME_Pathways_20.11.2017	2.9961e-10	1.36023e-07	1.02083e-11	1.73541e-10	[-1]	Group17	7.04225	45	Specific for Cluster #1	[ACTG1, AP2S1, CLTA, COPA, COPB1, COPB2, COPS7A, DNM1, DNM2, DYNC1H1, GDI2, KIF15, MYH7, PAFAH1B1, PREB, PRKAG3, RAB11A, RAB11B, RAB1A, RAB5B, RAB5C, RAB8A, RPS27A, SPTAN1, SPTBN4, TBC1D17, TBC1D8B, TSC2, UBB, YWHAB]	[ACTB, CALM1, CAPZB, CLTC, FTH1, HSPA8, MYH8, RAB1B, RAB7A, TF, UBC, YWHAE, YWHAG, YWHAQ, YWHAZ]	66.6667	33.3333	[ACTB, ACTG1, AP2S1, CALM1, CAPZB, CLTA, CLTC, COPA, COPB1, COPB2, COPS7A, DNM1, DNM2, DYNC1H1, FTH1, GDI2, HSPA8, KIF15, MYH7, MYH8, PAFAH1B1, PREB, PRKAG3, RAB11A, RAB11B, RAB1A, RAB1B, RAB5B, RAB5C, RAB7A, RAB8A, RPS27A, SPTAN1, SPTBN4, TBC1D17, TBC1D8B, TF, TSC2, UBB, UBC, YWHAB, YWHAE, YWHAG, YWHAQ, YWHAZ]
R-HSA:2682334	EPH-Ephrin signaling	REACTOME_Pathways_20.11.2017	9.31626e-05	0.0278556	1.02083e-11	1.73541e-10	[-1]	Group17	10.8696	10	Specific for Cluster #1	[ACTG1, AP2S1, CLTA, DNM1, LIMK2, MYH10, MYH9, PTK2]	[ACTB, CLTC]	80	20	[ACTB, ACTG1, AP2S1, CLTA, CLTC, DNM1, LIMK2, MYH10, MYH9, PTK2]
R-HSA:373760	L1CAM interactions	REACTOME_Pathways_20.11.2017	8.85024e-06	0.00313298	1.02083e-11	1.73541e-10	[-1]	Group17	10.8333	13	Specific for Cluster #1	[ACTG1, AP2S1, CLTA, DNM1, DNM2, EZR, SPTAN1, SPTBN4]	[ACTB, CLTC, HSPA8, MSN, RDX]	61.5385	38.4615	[ACTB, ACTG1, AP2S1, CLTA, CLTC, DNM1, DNM2, EZR, HSPA8, MSN, RDX, SPTAN1, SPTBN4]
R-HSA:437239	Recycling pathway of L1	REACTOME_Pathways_20.11.2017	2.23255e-07	8.79626e-05	1.02083e-11	1.73541e-10	[-1]	Group17	20.8333	10	Specific for Cluster #1	[ACTG1, AP2S1, CLTA, DNM1, DNM2, EZR]	[ACTB, CLTC, MSN, RDX]	60	40	[ACTB, ACTG1, AP2S1, CLTA, CLTC, DNM1, DNM2, EZR, MSN, RDX]
R-HSA:5653656	Vesicle-mediated transport	REACTOME_Pathways_20.11.2017	1.95557e-09	8.50671e-07	1.02083e-11	1.73541e-10	[-1]	Group17	6.63717	45	Specific for Cluster #1	[ACTG1, AP2S1, CLTA, COPA, COPB1, COPB2, COPS7A, DNM1, DNM2, DYNC1H1, GDI2, KIF15, MYH7, PAFAH1B1, PREB, PRKAG3, RAB11A, RAB11B, RAB1A, RAB5B, RAB5C, RAB8A, RPS27A, SPTAN1, SPTBN4, TBC1D17, TBC1D8B, TSC2, UBB, YWHAB]	[ACTB, CALM1, CAPZB, CLTC, FTH1, HSPA8, MYH8, RAB1B, RAB7A, TF, UBC, YWHAE, YWHAG, YWHAQ, YWHAZ]	66.6667	33.3333	[ACTB, ACTG1, AP2S1, CALM1, CAPZB, CLTA, CLTC, COPA, COPB1, COPB2, COPS7A, DNM1, DNM2, DYNC1H1, FTH1, GDI2, HSPA8, KIF15, MYH7, MYH8, PAFAH1B1, PREB, PRKAG3, RAB11A, RAB11B, RAB1A, RAB1B, RAB5B, RAB5C, RAB7A, RAB8A, RPS27A, SPTAN1, SPTBN4, TBC1D17, TBC1D8B, TF, TSC2, UBB, UBC, YWHAB, YWHAE, YWHAG, YWHAQ, YWHAZ]
R-HSA:5696394	DNA Damage Recognition in GG-NER	REACTOME_Pathways_20.11.2017	3.4111e-06	0.00126893	1.02083e-11	1.73541e-10	[-1]	Group17	21.0526	8	Specific for Cluster #1	[COPS7A, DDB1, RAD23A, RPS27A, UBB]	[ACTB, RAD23B, UBC]	62.5	37.5	[ACTB, COPS7A, DDB1, RAD23A, RAD23B, RPS27A, UBB, UBC]
R-HSA:8856828	Clathrin-mediated endocytosis	REACTOME_Pathways_20.11.2017	1.913e-06	0.000725029	1.02083e-11	1.73541e-10	[-1]	Group17	10.7914	15	Specific for Cluster #1	[ACTG1, AP2S1, CLTA, COPS7A, DNM1, DNM2, RAB5B, RAB5C, RPS27A, UBB]	[ACTB, CLTC, HSPA8, TF, UBC]	66.6667	33.3333	[ACTB, ACTG1, AP2S1, CLTA, CLTC, COPS7A, DNM1, DNM2, HSPA8, RAB5B, RAB5C, RPS27A, TF, UBB, UBC]
KEGG:00480	Glutathione metabolism	KEGG_20.11.2017	7.04604e-08	2.85364e-05	1.95137e-11	3.12219e-10	[-1]	Group18	20.3704	11	Specific for Cluster #1	[G6PD, GCLC, GPX2, GSTK1, GSTM3, GSTO1, MGST1, MGST3]	[GPX1, GSS, GSTA3]	72.7273	27.2727	[G6PD, GCLC, GPX1, GPX2, GSS, GSTA3, GSTK1, GSTM3, GSTO1, MGST1, MGST3]
R-HSA:156590	Glutathione conjugation	REACTOME_Pathways_20.11.2017	1.13229e-08	4.76692e-06	1.95137e-11	3.12219e-10	[-1]	Group18	27.7778	10	Specific for Cluster #1	[AKR1A1, GCLC, GSTK1, GSTM3, GSTO1, MGST1, MGST3]	[CNDP2, GSS, GSTA3]	70	30	[AKR1A1, CNDP2, GCLC, GSS, GSTA3, GSTK1, GSTM3, GSTO1, MGST1, MGST3]
R-HSA:3299685	Detoxification of Reactive Oxygen Species	REACTOME_Pathways_20.11.2017	2.1926e-07	8.68271e-05	1.95137e-11	3.12219e-10	[-1]	Group18	24.3243	9	Specific for Cluster #1	[CAT, GPX2, P4HB, PRDX1, PRDX3, PRDX6]	[GPX1, SOD1, TXN]	66.6667	33.3333	[CAT, GPX1, GPX2, P4HB, PRDX1, PRDX3, PRDX6, SOD1, TXN]
WP:2884	NRF2 pathway	WikiPathways_20.11.2017	3.54851e-06	0.00131295	1.95137e-11	3.12219e-10	[-1]	Group18	10.274	15	Specific for Cluster #1	[G6PD, GCLC, GPX2, GSTM3, HSPA1A, MGST3, PRDX1, PRDX6, SQSTM1]	[ABCC4, BLVRB, CBR1, FTH1, GSTA3, TXN]	60	40	[ABCC4, BLVRB, CBR1, FTH1, G6PD, GCLC, GPX2, GSTA3, GSTM3, HSPA1A, MGST3, PRDX1, PRDX6, SQSTM1, TXN]
GO:0006979	response to oxidative stress	GO_BiologicalProcess-EBI-QuickGO-GOA_20.11.2017_00h00	1.13074e-06	0.000433075	1.95137e-11	3.12219e-10	[3]	Group18	6.62252	30	Specific for Cluster #1	[AQP1, CAT, DLC1, DNM2, EEF2, FKBP1B, G6PD, GCLC, GPX2, HSPA1A, KPNA4, MGST1, NONO, OXSR1, P4HB, PRDX1, PRDX3, PRDX6, RACK1, SFPQ, STAT6, TXNL1]	[ALAD, GPX1, GSS, NME2, NME5, SOD1, TGFBRAP1, TXN]	73.3333	26.6667	[ALAD, AQP1, CAT, DLC1, DNM2, EEF2, FKBP1B, G6PD, GCLC, GPX1, GPX2, GSS, HSPA1A, KPNA4, MGST1, NME2, NME5, NONO, OXSR1, P4HB, PRDX1, PRDX3, PRDX6, RACK1, SFPQ, SOD1, STAT6, TGFBRAP1, TXN, TXNL1]
GO:0009636	response to toxic substance	GO_BiologicalProcess-EBI-QuickGO-GOA_20.11.2017_00h00	2.01175e-06	0.000756417	1.95137e-11	3.12219e-10	[3]	Group18	8.43882	20	Specific for Cluster #1	[CAT, CPOX, DHX15, DLC1, EPHX2, GPX2, GSTK1, GSTM3, GSTO1, MGST1, MGST3, PRDX1, PRDX3, PRDX4, PRDX6, TXNL1]	[ALAD, GPX1, SOD1, TXN]	80	20	[ALAD, CAT, CPOX, DHX15, DLC1, EPHX2, GPX1, GPX2, GSTK1, GSTM3, GSTO1, MGST1, MGST3, PRDX1, PRDX3, PRDX4, PRDX6, SOD1, TXN, TXNL1]
GO:0072593	reactive oxygen species metabolic process	GO_BiologicalProcess-EBI-QuickGO-GOA_20.11.2017_00h00	6.33439e-05	0.0201434	1.95137e-11	3.12219e-10	[3]	Group18	6.88406	19	Specific for Cluster #1	[CAT, DLC1, DNM2, EIF5A, EPHX2, G6PD, KHSRP, NNT, NOS1, PRDX1, PRDX3, PRDX4, PRDX6, PTGIS, VDAC1, VDAC2]	[GPX1, SOD1, TGFBRAP1]	84.2105	15.7895	[CAT, DLC1, DNM2, EIF5A, EPHX2, G6PD, GPX1, KHSRP, NNT, NOS1, PRDX1, PRDX3, PRDX4, PRDX6, PTGIS, SOD1, TGFBRAP1, VDAC1, VDAC2]
GO:0006575	cellular modified amino acid metabolic process	GO_BiologicalProcess-EBI-QuickGO-GOA_20.11.2017_00h00	8.67405e-05	0.0261089	1.95137e-11	3.12219e-10	[3, 4]	Group18	7.8534	15	None Specific Cluster	[G6PD, GCLC, GLO1, GSTK1, GSTM3, GSTO1, P4HB, PRDX4]	[AASDHPPT, CNDP2, DIDO1, GPX1, GSS, GSTA3, SOD1]	53.3333	46.6667	[AASDHPPT, CNDP2, DIDO1, G6PD, GCLC, GLO1, GPX1, GSS, GSTA3, GSTK1, GSTM3, GSTO1, P4HB, PRDX4, SOD1]
GO:1990748	cellular detoxification	GO_BiologicalProcess-EBI-QuickGO-GOA_20.11.2017_00h00	5.60226e-09	2.39216e-06	1.95137e-11	3.12219e-10	[2, 5]	Group18	15.3846	16	Specific for Cluster #1	[CAT, DLC1, GPX2, GSTK1, GSTM3, GSTO1, MGST1, MGST3, PRDX1, PRDX3, PRDX4, PRDX6, TXNL1]	[GPX1, SOD1, TXN]	81.25	18.75	[CAT, DLC1, GPX1, GPX2, GSTK1, GSTM3, GSTO1, MGST1, MGST3, PRDX1, PRDX3, PRDX4, PRDX6, SOD1, TXN, TXNL1]
GO:0034599	cellular response to oxidative stress	GO_BiologicalProcess-EBI-QuickGO-GOA_20.11.2017_00h00	6.63052e-06	0.00238036	1.95137e-11	3.12219e-10	[4]	Group18	7.30897	22	Specific for Cluster #1	[AQP1, CAT, DNM2, G6PD, GPX2, HSPA1A, MGST1, NONO, P4HB, PRDX1, PRDX3, PRDX6, RACK1, SFPQ, STAT6, TXNL1]	[GPX1, NME2, NME5, SOD1, TGFBRAP1, TXN]	72.7273	27.2727	[AQP1, CAT, DNM2, G6PD, GPX1, GPX2, HSPA1A, MGST1, NME2, NME5, NONO, P4HB, PRDX1, PRDX3, PRDX6, RACK1, SFPQ, SOD1, STAT6, TGFBRAP1, TXN, TXNL1]
GO:0042542	response to hydrogen peroxide	GO_BiologicalProcess-EBI-QuickGO-GOA_20.11.2017_00h00	7.68641e-05	0.0238279	1.95137e-11	3.12219e-10	[4, 5]	Group18	8.84354	13	Specific for Cluster #1	[AQP1, CAT, DLC1, EEF2, FKBP1B, KPNA4, PRDX3, RACK1, STAT6]	[GPX1, SOD1, TGFBRAP1, TXN]	69.2308	30.7692	[AQP1, CAT, DLC1, EEF2, FKBP1B, GPX1, KPNA4, PRDX3, RACK1, SOD1, STAT6, TGFBRAP1, TXN]
GO:0006749	glutathione metabolic process	GO_BiologicalProcess-EBI-QuickGO-GOA_20.11.2017_00h00	2.20659e-07	8.71604e-05	1.95137e-11	3.12219e-10	[4, 5, 6]	Group18	18.3333	11	None Specific Cluster	[G6PD, GCLC, GLO1, GSTK1, GSTM3, GSTO1]	[CNDP2, GPX1, GSS, GSTA3, SOD1]	54.5455	45.4545	[CNDP2, G6PD, GCLC, GLO1, GPX1, GSS, GSTA3, GSTK1, GSTM3, GSTO1, SOD1]
GO:1901687	glutathione derivative biosynthetic process	GO_BiologicalProcess-EBI-QuickGO-GOA_20.11.2017_00h00	6.78626e-07	0.000263307	1.95137e-11	3.12219e-10	[5]	Group18	31.8182	7	Specific for Cluster #1	[AKR1A1, GSTK1, GSTM3, GSTO1, MGST1, MGST3]	[GSTA3]	85.7143	14.2857	[AKR1A1, GSTA3, GSTK1, GSTM3, GSTO1, MGST1, MGST3]
GO:1903201	regulation of oxidative stress-induced cell death	GO_BiologicalProcess-EBI-QuickGO-GOA_20.11.2017_00h00	7.7733e-05	0.0240195	1.95137e-11	3.12219e-10	[4, 5, 6, 7]	Group18	12.3288	9	None Specific Cluster	[NONO, P4HB, RACK1, SFPQ]	[GPX1, NME5, SOD1, TGFBRAP1, TXN]	44.4444	55.5556	[GPX1, NME5, NONO, P4HB, RACK1, SFPQ, SOD1, TGFBRAP1, TXN]
GO:2001233	regulation of apoptotic signaling pathway	GO_BiologicalProcess-EBI-QuickGO-GOA_20.11.2017_00h00	2.38358e-06	0.000891458	1.95137e-11	3.12219e-10	[4, 5, 6, 7]	Group18	6.65083	28	Specific for Cluster #1	[ACAA2, CASP8, ETFB, GCLC, HNRNPK, HSPA1A, LMNA, NONO, P4HB, PDCD5, PYCARD, QARS, RACK1, SFPQ, TPT1, UBB, VDAC2, YWHAB]	[FADD, GPX1, NME5, SOD1, TGFBRAP1, WFS1, YWHAE, YWHAG, YWHAQ, YWHAZ]	64.2857	35.7143	[ACAA2, CASP8, ETFB, FADD, GCLC, GPX1, HNRNPK, HSPA1A, LMNA, NME5, NONO, P4HB, PDCD5, PYCARD, QARS, RACK1, SFPQ, SOD1, TGFBRAP1, TPT1, UBB, VDAC2, WFS1, YWHAB, YWHAE, YWHAG, YWHAQ, YWHAZ]
GO:2001242	regulation of intrinsic apoptotic signaling pathway	GO_BiologicalProcess-EBI-QuickGO-GOA_20.11.2017_00h00	2.25683e-05	0.00765064	1.95137e-11	3.12219e-10	[5, 6, 7, 8]	Group18	8.82353	15	Specific for Cluster #1	[HNRNPK, HSPA1A, NONO, P4HB, PYCARD, RACK1, SFPQ, TPT1, UBB, VDAC2]	[GPX1, NME5, SOD1, TGFBRAP1, WFS1]	66.6667	33.3333	[GPX1, HNRNPK, HSPA1A, NME5, NONO, P4HB, PYCARD, RACK1, SFPQ, SOD1, TGFBRAP1, TPT1, UBB, VDAC2, WFS1]
GO:1902175	regulation of oxidative stress-induced intrinsic apoptotic signaling pathway	GO_BiologicalProcess-EBI-QuickGO-GOA_20.11.2017_00h00	1.34254e-05	0.0046452	1.95137e-11	3.12219e-10	[5, 6, 7, 8, 9]	Group18	21.2121	7	None Specific Cluster	[NONO, P4HB, SFPQ]	[GPX1, NME5, SOD1, TGFBRAP1]	42.8571	57.1429	[GPX1, NME5, NONO, P4HB, SFPQ, SOD1, TGFBRAP1]
R-HSA:156827	L13a-mediated translational silencing of Ceruloplasmin expression	REACTOME_Pathways_20.11.2017	3.44757e-10	1.56175e-07	5.80314e-24	1.27669e-22	[-1]	Group19	15.9292	18	Specific for Cluster #1	[EIF2S1, EIF2S2, EIF3M, EIF4A1, EIF4A2, EIF4H, RPL12, RPL13, RPL7, RPL9, RPS11, RPS12, RPS20, RPS24, RPS27A]	[RPL22, RPL4, RPS18]	83.3333	16.6667	[EIF2S1, EIF2S2, EIF3M, EIF4A1, EIF4A2, EIF4H, RPL12, RPL13, RPL22, RPL4, RPL7, RPL9, RPS11, RPS12, RPS18, RPS20, RPS24, RPS27A]
R-HSA:156842	Eukaryotic Translation Elongation	REACTOME_Pathways_20.11.2017	1.00767e-08	4.25238e-06	5.80314e-24	1.27669e-22	[-1]	Group19	15.9574	15	Specific for Cluster #1	[EEF1B2, EEF1D, EEF2, RPL12, RPL13, RPL7, RPL9, RPS11, RPS12, RPS20, RPS24, RPS27A]	[RPL22, RPL4, RPS18]	80	20	[EEF1B2, EEF1D, EEF2, RPL12, RPL13, RPL22, RPL4, RPL7, RPL9, RPS11, RPS12, RPS18, RPS20, RPS24, RPS27A]
R-HSA:2408522	Selenoamino acid metabolism	REACTOME_Pathways_20.11.2017	2.54852e-07	0.000100157	5.80314e-24	1.27669e-22	[-1]	Group19	12.605	15	Specific for Cluster #1	[LARS, QARS, RARS, RPL12, RPL13, RPL7, RPL9, RPS11, RPS12, RPS20, RPS24, RPS27A]	[RPL22, RPL4, RPS18]	80	20	[LARS, QARS, RARS, RPL12, RPL13, RPL22, RPL4, RPL7, RPL9, RPS11, RPS12, RPS18, RPS20, RPS24, RPS27A]
R-HSA:72613	Eukaryotic Translation Initiation	REACTOME_Pathways_20.11.2017	1.08734e-09	4.8169e-07	5.80314e-24	1.27669e-22	[-1]	Group19	14.876	18	Specific for Cluster #1	[EIF2S1, EIF2S2, EIF3M, EIF4A1, EIF4A2, EIF4H, RPL12, RPL13, RPL7, RPL9, RPS11, RPS12, RPS20, RPS24, RPS27A]	[RPL22, RPL4, RPS18]	83.3333	16.6667	[EIF2S1, EIF2S2, EIF3M, EIF4A1, EIF4A2, EIF4H, RPL12, RPL13, RPL22, RPL4, RPL7, RPL9, RPS11, RPS12, RPS18, RPS20, RPS24, RPS27A]
R-HSA:72706	GTP hydrolysis and joining of the 60S ribosomal subunit	REACTOME_Pathways_20.11.2017	4.00179e-10	1.80881e-07	5.80314e-24	1.27669e-22	[-1]	Group19	15.7895	18	Specific for Cluster #1	[EIF2S1, EIF2S2, EIF3M, EIF4A1, EIF4A2, EIF4H, RPL12, RPL13, RPL7, RPL9, RPS11, RPS12, RPS20, RPS24, RPS27A]	[RPL22, RPL4, RPS18]	83.3333	16.6667	[EIF2S1, EIF2S2, EIF3M, EIF4A1, EIF4A2, EIF4H, RPL12, RPL13, RPL22, RPL4, RPL7, RPL9, RPS11, RPS12, RPS18, RPS20, RPS24, RPS27A]
R-HSA:72737	Cap-dependent Translation Initiation	REACTOME_Pathways_20.11.2017	1.08734e-09	4.8169e-07	5.80314e-24	1.27669e-22	[-1]	Group19	14.876	18	Specific for Cluster #1	[EIF2S1, EIF2S2, EIF3M, EIF4A1, EIF4A2, EIF4H, RPL12, RPL13, RPL7, RPL9, RPS11, RPS12, RPS20, RPS24, RPS27A]	[RPL22, RPL4, RPS18]	83.3333	16.6667	[EIF2S1, EIF2S2, EIF3M, EIF4A1, EIF4A2, EIF4H, RPL12, RPL13, RPL22, RPL4, RPL7, RPL9, RPS11, RPS12, RPS18, RPS20, RPS24, RPS27A]
R-HSA:72766	Translation	REACTOME_Pathways_20.11.2017	1.06237e-09	4.71694e-07	5.80314e-24	1.27669e-22	[-1]	Group19	9.58904	28	Specific for Cluster #1	[AARS, EEF1B2, EEF1D, EEF2, EIF2S1, EIF2S2, EIF3M, EIF4A1, EIF4A2, EIF4H, FARSB, GARS, LARS, QARS, RARS, RPL12, RPL13, RPL7, RPL9, RPS11, RPS12, RPS20, RPS24, RPS27A, WARS2]	[RPL22, RPL4, RPS18]	89.2857	10.7143	[AARS, EEF1B2, EEF1D, EEF2, EIF2S1, EIF2S2, EIF3M, EIF4A1, EIF4A2, EIF4H, FARSB, GARS, LARS, QARS, RARS, RPL12, RPL13, RPL22, RPL4, RPL7, RPL9, RPS11, RPS12, RPS18, RPS20, RPS24, RPS27A, WARS2]
R-HSA:927802	Nonsense-Mediated Decay (NMD)	REACTOME_Pathways_20.11.2017	1.09256e-06	0.000419544	5.80314e-24	1.27669e-22	[-1]	Group19	12.069	14	Specific for Cluster #1	[NCBP1, RBM8A, RPL12, RPL13, RPL7, RPL9, RPS11, RPS12, RPS20, RPS24, RPS27A]	[RPL22, RPL4, RPS18]	78.5714	21.4286	[NCBP1, RBM8A, RPL12, RPL13, RPL22, RPL4, RPL7, RPL9, RPS11, RPS12, RPS18, RPS20, RPS24, RPS27A]
R-HSA:975957	Nonsense Mediated Decay (NMD) enhanced by the Exon Junction Complex (EJC)	REACTOME_Pathways_20.11.2017	1.09256e-06	0.000419544	5.80314e-24	1.27669e-22	[-1]	Group19	12.069	14	Specific for Cluster #1	[NCBP1, RBM8A, RPL12, RPL13, RPL7, RPL9, RPS11, RPS12, RPS20, RPS24, RPS27A]	[RPL22, RPL4, RPS18]	78.5714	21.4286	[NCBP1, RBM8A, RPL12, RPL13, RPL22, RPL4, RPL7, RPL9, RPS11, RPS12, RPS18, RPS20, RPS24, RPS27A]
GO:0022613	ribonucleoprotein complex biogenesis	GO_BiologicalProcess-EBI-QuickGO-GOA_20.11.2017_00h00	2.69295e-08	1.11488e-05	5.80314e-24	1.27669e-22	[3]	Group19	7.08502	35	Specific for Cluster #1	[AGO1, AGO3, CIRBP, DYNC1H1, EIF2S1, EIF4H, MMAB, NCBP1, NOP2, RBMX, RPL12, RPL13, RPL7, RPL9, RPS11, RPS12, RPS20, RPS24, RPS27A, RSL1D1, SART3, SNRNP200, SNRPG, SNU13, SRSF6]	[AGO2, BOP1, LSM4, PATL1, RAN, RPL22, RPL4, RPS18, SNRPD3, SRSF1]	71.4286	28.5714	[AGO1, AGO2, AGO3, BOP1, CIRBP, DYNC1H1, EIF2S1, EIF4H, LSM4, MMAB, NCBP1, NOP2, PATL1, RAN, RBMX, RPL12, RPL13, RPL22, RPL4, RPL7, RPL9, RPS11, RPS12, RPS18, RPS20, RPS24, RPS27A, RSL1D1, SART3, SNRNP200, SNRPD3, SNRPG, SNU13, SRSF1, SRSF6]
GO:0043603	cellular amide metabolic process	GO_BiologicalProcess-EBI-QuickGO-GOA_20.11.2017_00h00	1.55306e-13	7.88953e-11	5.80314e-24	1.27669e-22	[4]	Group19	6.49106	69	Specific for Cluster #1	[AARS, AGO1, AGO3, CIRBP, EEF1B2, EEF1D, EEF2, EIF2S1, EIF2S2, EIF3M, EIF4A1, EIF4A2, EIF4H, EIF5A, FARSB, G6PD, GARS, GCLC, GLO1, GSTK1, GSTM3, GSTO1, HNRNPR, ILF3, KHSRP, LARP1, LARS, NCBP1, NCL, NIT2, NPEPPS, QARS, RACK1, RARS, RBM4B, RBM8A, RIDA, RPL12, RPL13, RPL7, RPL9, RPS11, RPS12, RPS20, RPS24, RPS27A, WARS2]	[AASDHPPT, ACO1, ADSL, AGO2, CDK5RAP1, CNDP2, GAPDH, GPX1, GSS, GSTA3, HSPA8, MCCC1, MTPN, NUP210, PGAM1, RAN, RPL22, RPL4, RPS18, SOD1, TGFBRAP1, XPNPEP1]	68.1159	31.8841	[AARS, AASDHPPT, ACO1, ADSL, AGO1, AGO2, AGO3, CDK5RAP1, CIRBP, CNDP2, EEF1B2, EEF1D, EEF2, EIF2S1, EIF2S2, EIF3M, EIF4A1, EIF4A2, EIF4H, EIF5A, FARSB, G6PD, GAPDH, GARS, GCLC, GLO1, GPX1, GSS, GSTA3, GSTK1, GSTM3, GSTO1, HNRNPR, HSPA8, ILF3, KHSRP, LARP1, LARS, MCCC1, MTPN, NCBP1, NCL, NIT2, NPEPPS, NUP210, PGAM1, QARS, RACK1, RAN, RARS, RBM4B, RBM8A, RIDA, RPL12, RPL13, RPL22, RPL4, RPL7, RPL9,…
GO:0006518	peptide metabolic process	GO_BiologicalProcess-EBI-QuickGO-GOA_20.11.2017_00h00	1.2046e-14	6.3121e-12	5.80314e-24	1.27669e-22	[4, 5]	Group19	7.1991	64	Specific for Cluster #1	[AARS, AGO1, AGO3, CIRBP, EEF1B2, EEF1D, EEF2, EIF2S1, EIF2S2, EIF3M, EIF4A1, EIF4A2, EIF4H, EIF5A, FARSB, G6PD, GARS, GCLC, GLO1, GSTK1, GSTM3, GSTO1, HNRNPR, ILF3, KHSRP, LARP1, LARS, NCBP1, NCL, NPEPPS, QARS, RACK1, RARS, RBM4B, RBM8A, RIDA, RPL12, RPL13, RPL7, RPL9, RPS11, RPS12, RPS20, RPS24, RPS27A, WARS2]	[ACO1, AGO2, CDK5RAP1, CNDP2, GAPDH, GPX1, GSS, GSTA3, HSPA8, MTPN, NUP210, RAN, RPL22, RPL4, RPS18, SOD1, TGFBRAP1, XPNPEP1]	71.875	28.125	[AARS, ACO1, AGO1, AGO2, AGO3, CDK5RAP1, CIRBP, CNDP2, EEF1B2, EEF1D, EEF2, EIF2S1, EIF2S2, EIF3M, EIF4A1, EIF4A2, EIF4H, EIF5A, FARSB, G6PD, GAPDH, GARS, GCLC, GLO1, GPX1, GSS, GSTA3, GSTK1, GSTM3, GSTO1, HNRNPR, HSPA8, ILF3, KHSRP, LARP1, LARS, MTPN, NCBP1, NCL, NPEPPS, NUP210, QARS, RACK1, RAN, RARS, RBM4B, RBM8A, RIDA, RPL12, RPL13, RPL22, RPL4, RPL7, RPL9, RPS11, RPS12, RPS18, RPS20, RPS24, …
GO:0034248	regulation of cellular amide metabolic process	GO_BiologicalProcess-EBI-QuickGO-GOA_20.11.2017_00h00	9.53274e-06	0.00335552	5.80314e-24	1.27669e-22	[4, 5]	Group19	6.18102	28	Specific for Cluster #1	[AGO1, AGO3, CIRBP, EEF2, EIF2S1, EIF4A2, EIF4H, EIF5A, GARS, HNRNPR, ILF3, KHSRP, LARP1, NCBP1, NCL, RACK1, RBM4B, RBM8A, RIDA]	[ACO1, AGO2, CDK5RAP1, GAPDH, MTPN, NUP210, PGAM1, RAN, TGFBRAP1]	67.8571	32.1429	[ACO1, AGO1, AGO2, AGO3, CDK5RAP1, CIRBP, EEF2, EIF2S1, EIF4A2, EIF4H, EIF5A, GAPDH, GARS, HNRNPR, ILF3, KHSRP, LARP1, MTPN, NCBP1, NCL, NUP210, PGAM1, RACK1, RAN, RBM4B, RBM8A, RIDA, TGFBRAP1]
GO:0043604	amide biosynthetic process	GO_BiologicalProcess-EBI-QuickGO-GOA_20.11.2017_00h00	4.73981e-11	2.20875e-08	5.80314e-24	1.27669e-22	[5]	Group19	6.60955	54	Specific for Cluster #1	[AARS, AGO1, AGO3, CIRBP, EEF1B2, EEF1D, EEF2, EIF2S1, EIF2S2, EIF3M, EIF4A1, EIF4A2, EIF4H, EIF5A, FARSB, GARS, GCLC, HNRNPR, ILF3, KHSRP, LARP1, LARS, NCBP1, NCL, QARS, RACK1, RARS, RBM4B, RBM8A, RIDA, RPL12, RPL13, RPL7, RPL9, RPS11, RPS12, RPS20, RPS24, RPS27A, WARS2]	[ACO1, ADSL, AGO2, CDK5RAP1, CNDP2, GAPDH, GSS, MTPN, NUP210, RAN, RPL22, RPL4, RPS18, TGFBRAP1]	74.0741	25.9259	[AARS, ACO1, ADSL, AGO1, AGO2, AGO3, CDK5RAP1, CIRBP, CNDP2, EEF1B2, EEF1D, EEF2, EIF2S1, EIF2S2, EIF3M, EIF4A1, EIF4A2, EIF4H, EIF5A, FARSB, GAPDH, GARS, GCLC, GSS, HNRNPR, ILF3, KHSRP, LARP1, LARS, MTPN, NCBP1, NCL, NUP210, QARS, RACK1, RAN, RARS, RBM4B, RBM8A, RIDA, RPL12, RPL13, RPL22, RPL4, RPL7, RPL9, RPS11, RPS12, RPS18, RPS20, RPS24, RPS27A, TGFBRAP1, WARS2]
GO:0010608	posttranscriptional regulation of gene expression	GO_BiologicalProcess-EBI-QuickGO-GOA_20.11.2017_00h00	1.35283e-17	7.75169e-15	5.80314e-24	1.27669e-22	[5, 6]	Group19	9.70696	53	None Specific Cluster	[AGO1, AGO3, CIRBP, EEF2, EIF2S1, EIF4A2, EIF4H, EIF5A, GARS, HNRNPR, HSPA1A, ILF3, KHSRP, LARP1, NCBP1, NCL, PSMB3, PSMB6, PSMC2, PSMD13, PSMD2, PSMD4, PSME1, RACK1, RBM4B, RBM8A, RIDA, RPS27A, TARDBP, UBB, YWHAB]	[ACO1, AGO2, CDK5RAP1, GAPDH, HSPA8, MTPN, NUP210, PSMA1, PSMA2, PSMA3, PSMA4, PSMA5, PSMA6, PSMA8, PSMB1, PSMB2, PSMB4, PSME2, RAN, TGFBRAP1, UBC, YWHAZ]	58.4906	41.5094	[ACO1, AGO1, AGO2, AGO3, CDK5RAP1, CIRBP, EEF2, EIF2S1, EIF4A2, EIF4H, EIF5A, GAPDH, GARS, HNRNPR, HSPA1A, HSPA8, ILF3, KHSRP, LARP1, MTPN, NCBP1, NCL, NUP210, PSMA1, PSMA2, PSMA3, PSMA4, PSMA5, PSMA6, PSMA8, PSMB1, PSMB2, PSMB3, PSMB4, PSMB6, PSMC2, PSMD13, PSMD2, PSMD4, PSME1, PSME2, RACK1, RAN, RBM4B, RBM8A, RIDA, RPS27A, TARDBP, TGFBRAP1, UBB, UBC, YWHAB, YWHAZ]
GO:0006412	translation	GO_BiologicalProcess-EBI-QuickGO-GOA_20.11.2017_00h00	2.0895e-11	9.79978e-09	5.80314e-24	1.27669e-22	[5, 6, 7]	Group19	7.10227	50	Specific for Cluster #1	[AARS, AGO1, AGO3, CIRBP, EEF1B2, EEF1D, EEF2, EIF2S1, EIF2S2, EIF3M, EIF4A1, EIF4A2, EIF4H, EIF5A, FARSB, GARS, HNRNPR, ILF3, KHSRP, LARP1, LARS, NCBP1, NCL, QARS, RACK1, RARS, RBM4B, RBM8A, RIDA, RPL12, RPL13, RPL7, RPL9, RPS11, RPS12, RPS20, RPS24, RPS27A, WARS2]	[ACO1, AGO2, CDK5RAP1, GAPDH, MTPN, NUP210, RAN, RPL22, RPL4, RPS18, TGFBRAP1]	78	22	[AARS, ACO1, AGO1, AGO2, AGO3, CDK5RAP1, CIRBP, EEF1B2, EEF1D, EEF2, EIF2S1, EIF2S2, EIF3M, EIF4A1, EIF4A2, EIF4H, EIF5A, FARSB, GAPDH, GARS, HNRNPR, ILF3, KHSRP, LARP1, LARS, MTPN, NCBP1, NCL, NUP210, QARS, RACK1, RAN, RARS, RBM4B, RBM8A, RIDA, RPL12, RPL13, RPL22, RPL4, RPL7, RPL9, RPS11, RPS12, RPS18, RPS20, RPS24, RPS27A, TGFBRAP1, WARS2]
GO:0006413	translational initiation	GO_BiologicalProcess-EBI-QuickGO-GOA_20.11.2017_00h00	3.92764e-08	1.61033e-05	5.80314e-24	1.27669e-22	[3, 6, 7, 8]	Group19	10.2941	21	Specific for Cluster #1	[EIF2S1, EIF2S2, EIF3M, EIF4A1, EIF4A2, EIF4H, LARP1, NCBP1, RPL12, RPL13, RPL7, RPL9, RPS11, RPS12, RPS20, RPS24, RPS27A]	[AGO2, RPL22, RPL4, RPS18]	80.9524	19.0476	[AGO2, EIF2S1, EIF2S2, EIF3M, EIF4A1, EIF4A2, EIF4H, LARP1, NCBP1, RPL12, RPL13, RPL22, RPL4, RPL7, RPL9, RPS11, RPS12, RPS18, RPS20, RPS24, RPS27A]
GO:0017148	negative regulation of translation	GO_BiologicalProcess-EBI-QuickGO-GOA_20.11.2017_00h00	2.89804e-05	0.00965046	5.80314e-24	1.27669e-22	[5, 6, 7, 8, 9]	Group19	7.87037	17	Specific for Cluster #1	[AGO1, AGO3, CIRBP, EIF2S1, GARS, HNRNPR, ILF3, KHSRP, LARP1, NCBP1, NCL, RACK1, RIDA]	[AGO2, GAPDH, NUP210, RAN]	76.4706	23.5294	[AGO1, AGO2, AGO3, CIRBP, EIF2S1, GAPDH, GARS, HNRNPR, ILF3, KHSRP, LARP1, NCBP1, NCL, NUP210, RACK1, RAN, RIDA]
GO:0000956	nuclear-transcribed mRNA catabolic process	GO_BiologicalProcess-EBI-QuickGO-GOA_20.11.2017_00h00	1.23458e-07	4.95067e-05	5.80314e-24	1.27669e-22	[6, 7, 8, 9]	Group19	9.63303	21	Specific for Cluster #1	[AGO1, EIF4A1, EIF4A2, NCBP1, RBM8A, RPL12, RPL13, RPL7, RPL9, RPS11, RPS12, RPS20, RPS24, RPS27A]	[AGO2, LSM1, LSM4, PATL1, RPL22, RPL4, RPS18]	66.6667	33.3333	[AGO1, AGO2, EIF4A1, EIF4A2, LSM1, LSM4, NCBP1, PATL1, RBM8A, RPL12, RPL13, RPL22, RPL4, RPL7, RPL9, RPS11, RPS12, RPS18, RPS20, RPS24, RPS27A]
GO:0000184	nuclear-transcribed mRNA catabolic process, nonsense-mediated decay	GO_BiologicalProcess-EBI-QuickGO-GOA_20.11.2017_00h00	3.92874e-06	0.00144578	5.80314e-24	1.27669e-22	[7, 8, 9, 10]	Group19	10.8527	14	Specific for Cluster #1	[NCBP1, RBM8A, RPL12, RPL13, RPL7, RPL9, RPS11, RPS12, RPS20, RPS24, RPS27A]	[RPL22, RPL4, RPS18]	78.5714	21.4286	[NCBP1, RBM8A, RPL12, RPL13, RPL22, RPL4, RPL7, RPL9, RPS11, RPS12, RPS18, RPS20, RPS24, RPS27A]
R-HSA:110320	Translesion Synthesis by POLH	REACTOME_Pathways_20.11.2017	7.98889e-05	0.0246058	9.15291e-19	1.64752e-17	[-1]	Group20	26.3158	5	Specific for Cluster #1	[NPLOC4, RPS27A, UBB]	[UBC, VCP]	60	40	[NPLOC4, RPS27A, UBB, UBC, VCP]
R-HSA:5205685	Pink/Parkin Mediated Mitophagy	REACTOME_Pathways_20.11.2017	0.000170149	0.0476418	9.15291e-19	1.64752e-17	[-1]	Group20	22.7273	5	Specific for Cluster #1	[RPS27A, SQSTM1, UBB, VDAC1]	[UBC]	80	20	[RPS27A, SQSTM1, UBB, UBC, VDAC1]
R-HSA:5213460	RIPK1-mediated regulated necrosis	REACTOME_Pathways_20.11.2017	0.000170149	0.0476418	9.15291e-19	1.64752e-17	[-1]	Group20	22.7273	5	Specific for Cluster #1	[CASP8, RPS27A, UBB]	[FADD, UBC]	60	40	[CASP8, FADD, RPS27A, UBB, UBC]
R-HSA:5218859	Regulated Necrosis	REACTOME_Pathways_20.11.2017	0.000170149	0.0476418	9.15291e-19	1.64752e-17	[-1]	Group20	22.7273	5	Specific for Cluster #1	[CASP8, RPS27A, UBB]	[FADD, UBC]	60	40	[CASP8, FADD, RPS27A, UBB, UBC]
R-HSA:5675482	Regulation of necroptotic cell death	REACTOME_Pathways_20.11.2017	0.000104359	0.0309947	9.15291e-19	1.64752e-17	[-1]	Group20	25	5	Specific for Cluster #1	[CASP8, RPS27A, UBB]	[FADD, UBC]	60	40	[CASP8, FADD, RPS27A, UBB, UBC]
R-HSA:5689877	Josephin domain DUBs	REACTOME_Pathways_20.11.2017	1.82845e-07	7.25893e-05	9.15291e-19	1.64752e-17	[-1]	Group20	50	6	None Specific Cluster	[RAD23A, RPS27A, UBB]	[RAD23B, UBC, VCP]	50	50	[RAD23A, RAD23B, RPS27A, UBB, UBC, VCP]
R-HSA:5696394	DNA Damage Recognition in GG-NER	REACTOME_Pathways_20.11.2017	3.4111e-06	0.00126893	9.15291e-19	1.64752e-17	[-1]	Group20	21.0526	8	Specific for Cluster #1	[COPS7A, DDB1, RAD23A, RPS27A, UBB]	[ACTB, RAD23B, UBC]	62.5	37.5	[ACTB, COPS7A, DDB1, RAD23A, RAD23B, RPS27A, UBB, UBC]
R-HSA:5696395	Formation of Incision Complex in GG-NER	REACTOME_Pathways_20.11.2017	8.17752e-05	0.0250232	9.15291e-19	1.64752e-17	[-1]	Group20	16.2791	7	Specific for Cluster #1	[DDB1, RAD23A, RPS27A, SUMO3, UBB]	[RAD23B, UBC]	71.4286	28.5714	[DDB1, RAD23A, RAD23B, RPS27A, SUMO3, UBB, UBC]
R-HSA:8856828	Clathrin-mediated endocytosis	REACTOME_Pathways_20.11.2017	1.913e-06	0.000725029	9.15291e-19	1.64752e-17	[-1]	Group20	10.7914	15	Specific for Cluster #1	[ACTG1, AP2S1, CLTA, COPS7A, DNM1, DNM2, RAB5B, RAB5C, RPS27A, UBB]	[ACTB, CLTC, HSPA8, TF, UBC]	66.6667	33.3333	[ACTB, ACTG1, AP2S1, CLTA, CLTC, COPS7A, DNM1, DNM2, HSPA8, RAB5B, RAB5C, RPS27A, TF, UBB, UBC]
R-HSA:917937	Iron uptake and transport	REACTOME_Pathways_20.11.2017	8.66742e-05	0.0261756	9.15291e-19	1.64752e-17	[-1]	Group20	13.7931	8	Specific for Cluster #2	[ATP6V1A, RPS27A, UBB]	[ACO1, ATP6V1B2, FTH1, TF, UBC]	37.5	62.5	[ACO1, ATP6V1A, ATP6V1B2, FTH1, RPS27A, TF, UBB, UBC]
GO:0044766	multi-organism transport	GO_BiologicalProcess-EBI-QuickGO-GOA_20.11.2017_00h00	0.000130929	0.0379695	9.15291e-19	1.64752e-17	[3, 4]	Group20	11.5385	9	None Specific Cluster	[ALYREF, KPNA4, RPS27A, UBB]	[CD209, NUP210, RAB7A, RAN, UBC]	44.4444	55.5556	[ALYREF, CD209, KPNA4, NUP210, RAB7A, RAN, RPS27A, UBB, UBC]
GO:0051701	interaction with host	GO_BiologicalProcess-EBI-QuickGO-GOA_20.11.2017_00h00	0.000147424	0.0418685	9.15291e-19	1.64752e-17	[3, 4]	Group20	7.17489	16	Specific for Cluster #1	[ALYREF, CASP8, DDB1, HSPA1A, KPNA4, P4HB, RPS27A, TRIM21, TRIM35, UBB]	[CD209, GAPDH, LGALS1, RAB7A, TRIM62, UBC]	62.5	37.5	[ALYREF, CASP8, CD209, DDB1, GAPDH, HSPA1A, KPNA4, LGALS1, P4HB, RAB7A, RPS27A, TRIM21, TRIM35, TRIM62, UBB, UBC]
GO:0019058	viral life cycle	GO_BiologicalProcess-EBI-QuickGO-GOA_20.11.2017_00h00	1.79911e-06	0.000683661	9.15291e-19	1.64752e-17	[5]	Group20	7.45342	24	None Specific Cluster	[DDB1, HSPA1A, ILF3, KPNA4, LARP1, MX1, P4HB, RAB1A, RAD23A, RPS27A, TRIM21, TRIM35, UBB]	[BANF1, CD209, HSPA8, LGALS1, NUP210, RAB1B, RAB7A, RAN, TRIM62, UBC, VCP]	54.1667	45.8333	[BANF1, CD209, DDB1, HSPA1A, HSPA8, ILF3, KPNA4, LARP1, LGALS1, MX1, NUP210, P4HB, RAB1A, RAB1B, RAB7A, RAD23A, RAN, RPS27A, TRIM21, TRIM35, TRIM62, UBB, UBC, VCP]
GO:0034612	response to tumor necrosis factor	GO_BiologicalProcess-EBI-QuickGO-GOA_20.11.2017_00h00	8.79051e-10	3.92057e-07	9.15291e-19	1.64752e-17	[5]	Group20	9.38511	29	None Specific Cluster	[CASP8, ETFB, HSPA1A, PSMB3, PSMB6, PSMC2, PSMD13, PSMD2, PSMD4, PSME1, PYCARD, RACK1, RPS27A, UBB]	[GSS, PSMA1, PSMA2, PSMA3, PSMA4, PSMA5, PSMA6, PSMA8, PSMB1, PSMB2, PSMB4, PSME2, SPHK1, TNFRSF6B, UBC]	48.2759	51.7241	[CASP8, ETFB, GSS, HSPA1A, PSMA1, PSMA2, PSMA3, PSMA4, PSMA5, PSMA6, PSMA8, PSMB1, PSMB2, PSMB3, PSMB4, PSMB6, PSMC2, PSMD13, PSMD2, PSMD4, PSME1, PSME2, PYCARD, RACK1, RPS27A, SPHK1, TNFRSF6B, UBB, UBC]
GO:0060544	regulation of necroptotic process	GO_BiologicalProcess-EBI-QuickGO-GOA_20.11.2017_00h00	0.000134196	0.0387827	9.15291e-19	1.64752e-17	[5, 6]	Group20	23.8095	5	Specific for Cluster #1	[CASP8, RPS27A, UBB]	[FADD, UBC]	60	40	[CASP8, FADD, RPS27A, UBB, UBC]
GO:0033209	tumor necrosis factor-mediated signaling pathway	GO_BiologicalProcess-EBI-QuickGO-GOA_20.11.2017_00h00	7.44238e-15	3.92213e-12	9.15291e-19	1.64752e-17	[5, 6, 7]	Group20	15.5556	28	None Specific Cluster	[CASP8, ETFB, HSPA1A, PSMB3, PSMB6, PSMC2, PSMD13, PSMD2, PSMD4, PSME1, PYCARD, RACK1, RPS27A, UBB]	[PSMA1, PSMA2, PSMA3, PSMA4, PSMA5, PSMA6, PSMA8, PSMB1, PSMB2, PSMB4, PSME2, SPHK1, TNFRSF6B, UBC]	50	50	[CASP8, ETFB, HSPA1A, PSMA1, PSMA2, PSMA3, PSMA4, PSMA5, PSMA6, PSMA8, PSMB1, PSMB2, PSMB3, PSMB4, PSMB6, PSMC2, PSMD13, PSMD2, PSMD4, PSME1, PSME2, PYCARD, RACK1, RPS27A, SPHK1, TNFRSF6B, UBB, UBC]
GO:0010803	regulation of tumor necrosis factor-mediated signaling pathway	GO_BiologicalProcess-EBI-QuickGO-GOA_20.11.2017_00h00	2.35793e-05	0.00794623	9.15291e-19	1.64752e-17	[5, 6, 7, 8]	Group20	14.2857	9	Specific for Cluster #1	[CASP8, ETFB, HSPA1A, PYCARD, RACK1, RPS27A, UBB]	[SPHK1, UBC]	77.7778	22.2222	[CASP8, ETFB, HSPA1A, PYCARD, RACK1, RPS27A, SPHK1, UBB, UBC]
GO:0000715	nucleotide-excision repair, DNA damage recognition	GO_BiologicalProcess-EBI-QuickGO-GOA_20.11.2017_00h00	2.06782e-05	0.00705127	9.15291e-19	1.64752e-17	[5, 7, 8, 9]	Group20	25	6	Specific for Cluster #1	[COPS7A, DDB1, RPS27A, UBB]	[RAD23B, UBC]	66.6667	33.3333	[COPS7A, DDB1, RAD23B, RPS27A, UBB, UBC]
GO:0006826	iron ion transport	GO_BiologicalProcess-EBI-QuickGO-GOA_20.11.2017_00h00	0.000140233	0.0403872	9.15291e-19	1.64752e-17	[8]	Group20	12.9032	8	Specific for Cluster #2	[ATP6V1A, DNM2, RAB11B]	[ATP6V1B2, CLTC, FTH1, STEAP4, TF]	37.5	62.5	[ATP6V1A, ATP6V1B2, CLTC, DNM2, FTH1, RAB11B, STEAP4, TF]
GO:0070911	global genome nucleotide-excision repair	GO_BiologicalProcess-EBI-QuickGO-GOA_20.11.2017_00h00	0.000117688	0.0344826	9.15291e-19	1.64752e-17	[7, 8, 9]	Group20	18.75	6	Specific for Cluster #1	[DDB1, RPS27A, SUMO3, UBB]	[RAD23B, UBC]	66.6667	33.3333	[DDB1, RAD23B, RPS27A, SUMO3, UBB, UBC]
GO:0070987	error-free translesion synthesis	GO_BiologicalProcess-EBI-QuickGO-GOA_20.11.2017_00h00	0.000170149	0.0476418	9.15291e-19	1.64752e-17	[8, 9, 10]	Group20	22.7273	5	Specific for Cluster #1	[NPLOC4, RPS27A, UBB]	[UBC, VCP]	60	40	[NPLOC4, RPS27A, UBB, UBC, VCP]
R-HSA:376176	Signaling by ROBO receptors	REACTOME_Pathways_20.11.2017	9.39766e-18	5.39425e-15	8.62089e-23	1.81039e-21	[-1]	Group21	15.5251	34	None Specific Cluster	[NCBP1, PSMB3, PSMB6, PSMC2, PSMD13, PSMD2, PSMD4, PSME1, RBM8A, RPL12, RPL13, RPL7, RPL9, RPS11, RPS12, RPS20, RPS24, RPS27A, UBB]	[PSMA1, PSMA2, PSMA3, PSMA4, PSMA5, PSMA6, PSMA8, PSMB1, PSMB2, PSMB4, PSME2, RPL22, RPL4, RPS18, UBC]	55.8824	44.1176	[NCBP1, PSMA1, PSMA2, PSMA3, PSMA4, PSMA5, PSMA6, PSMA8, PSMB1, PSMB2, PSMB3, PSMB4, PSMB6, PSMC2, PSMD13, PSMD2, PSMD4, PSME1, PSME2, RBM8A, RPL12, RPL13, RPL22, RPL4, RPL7, RPL9, RPS11, RPS12, RPS18, RPS20, RPS24, RPS27A, UBB, UBC]
R-HSA:422475	Axon guidance	REACTOME_Pathways_20.11.2017	1.70833e-16	9.46412e-14	8.62089e-23	1.81039e-21	[-1]	Group21	9.30233	52	None Specific Cluster	[ACTG1, AP2S1, CLTA, DNM1, DNM2, EZR, LIMK2, MYH10, MYH9, NCBP1, PSMB3, PSMB6, PSMC2, PSMD13, PSMD2, PSMD4, PSME1, PTK2, RBM8A, RPL12, RPL13, RPL7, RPL9, RPS11, RPS12, RPS20, RPS24, RPS27A, SPTAN1, SPTBN4, UBB]	[ACTB, AGRN, CLTC, HSPA8, MSN, PSMA1, PSMA2, PSMA3, PSMA4, PSMA5, PSMA6, PSMA8, PSMB1, PSMB2, PSMB4, PSME2, RDX, RPL22, RPL4, RPS18, UBC]	59.6154	40.3846	[ACTB, ACTG1, AGRN, AP2S1, CLTA, CLTC, DNM1, DNM2, EZR, HSPA8, LIMK2, MSN, MYH10, MYH9, NCBP1, PSMA1, PSMA2, PSMA3, PSMA4, PSMA5, PSMA6, PSMA8, PSMB1, PSMB2, PSMB3, PSMB4, PSMB6, PSMC2, PSMD13, PSMD2, PSMD4, PSME1, PSME2, PTK2, RBM8A, RDX, RPL12, RPL13, RPL22, RPL4, RPL7, RPL9, RPS11, RPS12, RPS18, RPS20, RPS24, RPS27A, SPTAN1, SPTBN4, UBB, UBC]
R-HSA:450531	Regulation of mRNA stability by proteins that bind AU-rich elements	REACTOME_Pathways_20.11.2017	3.07654e-21	1.87361e-18	8.62089e-23	1.81039e-21	[-1]	Group21	29.5455	26	None Specific Cluster	[HSPA1A, KHSRP, PSMB3, PSMB6, PSMC2, PSMD13, PSMD2, PSMD4, PSME1, RPS27A, UBB, YWHAB]	[HSPA8, PSMA1, PSMA2, PSMA3, PSMA4, PSMA5, PSMA6, PSMA8, PSMB1, PSMB2, PSMB4, PSME2, UBC, YWHAZ]	46.1538	53.8462	[HSPA1A, HSPA8, KHSRP, PSMA1, PSMA2, PSMA3, PSMA4, PSMA5, PSMA6, PSMA8, PSMB1, PSMB2, PSMB3, PSMB4, PSMB6, PSMC2, PSMD13, PSMD2, PSMD4, PSME1, PSME2, RPS27A, UBB, UBC, YWHAB, YWHAZ]
R-HSA:5663205	Infectious disease	REACTOME_Pathways_20.11.2017	6.46736e-16	3.52471e-13	8.62089e-23	1.81039e-21	[-1]	Group21	10.2273	45	None Specific Cluster	[AP2S1, CLTA, EEF2, HSPA1A, KPNA4, NCBP1, PSMB3, PSMB6, PSMC2, PSMD13, PSMD2, PSMD4, PSME1, RANBP1, RPL12, RPL13, RPL7, RPL9, RPS11, RPS12, RPS20, RPS24, RPS27A, SSRP1, UBB]	[BANF1, CALM1, CLTC, NUP210, PSMA1, PSMA2, PSMA3, PSMA4, PSMA5, PSMA6, PSMA8, PSMB1, PSMB2, PSMB4, PSME2, RAN, RPL22, RPL4, RPS18, UBC]	55.5556	44.4444	[AP2S1, BANF1, CALM1, CLTA, CLTC, EEF2, HSPA1A, KPNA4, NCBP1, NUP210, PSMA1, PSMA2, PSMA3, PSMA4, PSMA5, PSMA6, PSMA8, PSMB1, PSMB2, PSMB3, PSMB4, PSMB6, PSMC2, PSMD13, PSMD2, PSMD4, PSME1, PSME2, RAN, RANBP1, RPL12, RPL13, RPL22, RPL4, RPL7, RPL9, RPS11, RPS12, RPS18, RPS20, RPS24, RPS27A, SSRP1, UBB, UBC]
R-HSA:71291	Metabolism of amino acids and derivatives	REACTOME_Pathways_20.11.2017	7.54344e-14	3.87733e-11	8.62089e-23	1.81039e-21	[-1]	Group21	10.411	38	None Specific Cluster	[KYAT3, LARS, PSMB3, PSMB6, PSMC2, PSMD13, PSMD2, PSMD4, PSME1, QARS, RARS, RPL12, RPL13, RPL7, RPL9, RPS11, RPS12, RPS20, RPS24, RPS27A]	[ALDH9A1, HPD, MCCC1, MTAP, PSMA1, PSMA2, PSMA3, PSMA4, PSMA5, PSMA6, PSMA8, PSMB1, PSMB2, PSMB4, PSME2, RPL22, RPL4, RPS18]	52.6316	47.3684	[ALDH9A1, HPD, KYAT3, LARS, MCCC1, MTAP, PSMA1, PSMA2, PSMA3, PSMA4, PSMA5, PSMA6, PSMA8, PSMB1, PSMB2, PSMB3, PSMB4, PSMB6, PSMC2, PSMD13, PSMD2, PSMD4, PSME1, PSME2, QARS, RARS, RPL12, RPL13, RPL22, RPL4, RPL7, RPL9, RPS11, RPS12, RPS18, RPS20, RPS24, RPS27A]
R-HSA:8953854	Metabolism of RNA	REACTOME_Pathways_20.11.2017	2.86212e-23	1.76879e-20	8.62089e-23	1.81039e-21	[-1]	Group21	10.0443	68	None Specific Cluster	[ALYREF, DHX15, EIF4A1, EIF4A2, HNRNPK, HNRNPL, HNRNPR, HNRNPUL1, HSPA1A, KHSRP, NCBP1, NCL, NOP2, PSMB3, PSMB6, PSMC2, PSMD13, PSMD2, PSMD4, PSME1, RBM8A, RBMX, RPL12, RPL13, RPL7, RPL9, RPS11, RPS12, RPS20, RPS24, RPS27A, SNRNP200, SNRPG, SNU13, SNURF, SRSF3, SRSF6, UBB, WBP4, YWHAB]	[BOP1, HNRNPA1, HSPA8, LSM1, LSM4, NUP210, PATL1, PSMA1, PSMA2, PSMA3, PSMA4, PSMA5, PSMA6, PSMA8, PSMB1, PSMB2, PSMB4, PSME2, RAN, RPL22, RPL4, RPS18, SNRPD3, SRSF1, SRSF2, SRSF4, UBC, YWHAZ]	58.8235	41.1765	[ALYREF, BOP1, DHX15, EIF4A1, EIF4A2, HNRNPA1, HNRNPK, HNRNPL, HNRNPR, HNRNPUL1, HSPA1A, HSPA8, KHSRP, LSM1, LSM4, NCBP1, NCL, NOP2, NUP210, PATL1, PSMA1, PSMA2, PSMA3, PSMA4, PSMA5, PSMA6, PSMA8, PSMB1, PSMB2, PSMB3, PSMB4, PSMB6, PSMC2, PSMD13, PSMD2, PSMD4, PSME1, PSME2, RAN, RBM8A, RBMX, RPL12, RPL13, RPL22, RPL4, RPL7, RPL9, RPS11, RPS12, RPS18, RPS20, RPS24, RPS27A, SNRNP200, SNRPD3, SNRPG,…
R-HSA:9010553	Regulation of expression of SLITs and ROBOs	REACTOME_Pathways_20.11.2017	3.34069e-21	2.03114e-18	8.62089e-23	1.81039e-21	[-1]	Group21	19.7674	34	None Specific Cluster	[NCBP1, PSMB3, PSMB6, PSMC2, PSMD13, PSMD2, PSMD4, PSME1, RBM8A, RPL12, RPL13, RPL7, RPL9, RPS11, RPS12, RPS20, RPS24, RPS27A, UBB]	[PSMA1, PSMA2, PSMA3, PSMA4, PSMA5, PSMA6, PSMA8, PSMB1, PSMB2, PSMB4, PSME2, RPL22, RPL4, RPS18, UBC]	55.8824	44.1176	[NCBP1, PSMA1, PSMA2, PSMA3, PSMA4, PSMA5, PSMA6, PSMA8, PSMB1, PSMB2, PSMB3, PSMB4, PSMB6, PSMC2, PSMD13, PSMD2, PSMD4, PSME1, PSME2, RBM8A, RPL12, RPL13, RPL22, RPL4, RPL7, RPL9, RPS11, RPS12, RPS18, RPS20, RPS24, RPS27A, UBB, UBC]
GO:0019439	aromatic compound catabolic process	GO_BiologicalProcess-EBI-QuickGO-GOA_20.11.2017_00h00	2.64073e-22	1.62405e-19	8.62089e-23	1.81039e-21	[4]	Group21	10.5263	62	None Specific Cluster	[AGO1, AGO3, BLVRA, CIRBP, EIF4A1, EIF4A2, EPHX2, HNRNPR, HSPA1A, KHSRP, LARP1, NCBP1, NT5C2, PSMB3, PSMB6, PSMC2, PSMD13, PSMD2, PSMD4, PSME1, RACK1, RBM8A, RPL12, RPL13, RPL7, RPL9, RPS11, RPS12, RPS20, RPS24, RPS27A, SAMHD1, TARDBP, UBB, YWHAB]	[AGO2, BLVRB, GPX1, HPD, HPRT1, HSPA8, LSM1, LSM4, PATL1, PSMA1, PSMA2, PSMA3, PSMA4, PSMA5, PSMA6, PSMA8, PSMB1, PSMB2, PSMB4, PSME2, RPL22, RPL4, RPS18, TYMP, UBC, VCP, YWHAZ]	56.4516	43.5484	[AGO1, AGO2, AGO3, BLVRA, BLVRB, CIRBP, EIF4A1, EIF4A2, EPHX2, GPX1, HNRNPR, HPD, HPRT1, HSPA1A, HSPA8, KHSRP, LARP1, LSM1, LSM4, NCBP1, NT5C2, PATL1, PSMA1, PSMA2, PSMA3, PSMA4, PSMA5, PSMA6, PSMA8, PSMB1, PSMB2, PSMB3, PSMB4, PSMB6, PSMC2, PSMD13, PSMD2, PSMD4, PSME1, PSME2, RACK1, RBM8A, RPL12, RPL13, RPL22, RPL4, RPL7, RPL9, RPS11, RPS12, RPS18, RPS20, RPS24, RPS27A, SAMHD1, TARDBP, TYMP, UBB…
GO:0044270	cellular nitrogen compound catabolic process	GO_BiologicalProcess-EBI-QuickGO-GOA_20.11.2017_00h00	8.13324e-23	5.01821e-20	8.62089e-23	1.81039e-21	[4]	Group21	10.7639	62	None Specific Cluster	[AGO1, AGO3, BLVRA, CIRBP, EIF4A1, EIF4A2, HNRNPR, HSPA1A, KHSRP, LARP1, NCBP1, NT5C2, PSMB3, PSMB6, PSMC2, PSMD13, PSMD2, PSMD4, PSME1, RACK1, RBM8A, RPL12, RPL13, RPL7, RPL9, RPS11, RPS12, RPS20, RPS24, RPS27A, SAMHD1, TARDBP, UBB, VDAC2, YWHAB]	[AGO2, BLVRB, CYP3A4, GPX1, HPRT1, HSPA8, LSM1, LSM4, PATL1, PSMA1, PSMA2, PSMA3, PSMA4, PSMA5, PSMA6, PSMA8, PSMB1, PSMB2, PSMB4, PSME2, RPL22, RPL4, RPS18, TYMP, UBC, VCP, YWHAZ]	56.4516	43.5484	[AGO1, AGO2, AGO3, BLVRA, BLVRB, CIRBP, CYP3A4, EIF4A1, EIF4A2, GPX1, HNRNPR, HPRT1, HSPA1A, HSPA8, KHSRP, LARP1, LSM1, LSM4, NCBP1, NT5C2, PATL1, PSMA1, PSMA2, PSMA3, PSMA4, PSMA5, PSMA6, PSMA8, PSMB1, PSMB2, PSMB3, PSMB4, PSMB6, PSMC2, PSMD13, PSMD2, PSMD4, PSME1, PSME2, RACK1, RBM8A, RPL12, RPL13, RPL22, RPL4, RPL7, RPL9, RPS11, RPS12, RPS18, RPS20, RPS24, RPS27A, SAMHD1, TARDBP, TYMP, UBB, UB…
GO:0046700	heterocycle catabolic process	GO_BiologicalProcess-EBI-QuickGO-GOA_20.11.2017_00h00	1.75068e-21	1.06966e-18	8.62089e-23	1.81039e-21	[4]	Group21	10.4712	60	None Specific Cluster	[AGO1, AGO3, BLVRA, CIRBP, EIF4A1, EIF4A2, HNRNPR, HSPA1A, KHSRP, LARP1, NCBP1, NT5C2, PSMB3, PSMB6, PSMC2, PSMD13, PSMD2, PSMD4, PSME1, RACK1, RBM8A, RPL12, RPL13, RPL7, RPL9, RPS11, RPS12, RPS20, RPS24, RPS27A, SAMHD1, TARDBP, UBB, YWHAB]	[AGO2, BLVRB, GPX1, HPRT1, HSPA8, LSM1, LSM4, PATL1, PSMA1, PSMA2, PSMA3, PSMA4, PSMA5, PSMA6, PSMA8, PSMB1, PSMB2, PSMB4, PSME2, RPL22, RPL4, RPS18, TYMP, UBC, VCP, YWHAZ]	56.6667	43.3333	[AGO1, AGO2, AGO3, BLVRA, BLVRB, CIRBP, EIF4A1, EIF4A2, GPX1, HNRNPR, HPRT1, HSPA1A, HSPA8, KHSRP, LARP1, LSM1, LSM4, NCBP1, NT5C2, PATL1, PSMA1, PSMA2, PSMA3, PSMA4, PSMA5, PSMA6, PSMA8, PSMB1, PSMB2, PSMB3, PSMB4, PSMB6, PSMC2, PSMD13, PSMD2, PSMD4, PSME1, PSME2, RACK1, RBM8A, RPL12, RPL13, RPL22, RPL4, RPL7, RPL9, RPS11, RPS12, RPS18, RPS20, RPS24, RPS27A, SAMHD1, TARDBP, TYMP, UBB, UBC, VCP, …
GO:1901361	organic cyclic compound catabolic process	GO_BiologicalProcess-EBI-QuickGO-GOA_20.11.2017_00h00	9.84317e-22	6.02402e-19	8.62089e-23	1.81039e-21	[4]	Group21	10.1124	63	None Specific Cluster	[AGO1, AGO3, BLVRA, CIRBP, EIF4A1, EIF4A2, EPHX2, HNRNPR, HSPA1A, KHSRP, LARP1, NCBP1, NT5C2, PSMB3, PSMB6, PSMC2, PSMD13, PSMD2, PSMD4, PSME1, RACK1, RBM8A, RPL12, RPL13, RPL7, RPL9, RPS11, RPS12, RPS20, RPS24, RPS27A, SAMHD1, TARDBP, UBB, YWHAB]	[AGO2, BLVRB, CYP3A4, GPX1, HPD, HPRT1, HSPA8, LSM1, LSM4, PATL1, PSMA1, PSMA2, PSMA3, PSMA4, PSMA5, PSMA6, PSMA8, PSMB1, PSMB2, PSMB4, PSME2, RPL22, RPL4, RPS18, TYMP, UBC, VCP, YWHAZ]	55.5556	44.4444	[AGO1, AGO2, AGO3, BLVRA, BLVRB, CIRBP, CYP3A4, EIF4A1, EIF4A2, EPHX2, GPX1, HNRNPR, HPD, HPRT1, HSPA1A, HSPA8, KHSRP, LARP1, LSM1, LSM4, NCBP1, NT5C2, PATL1, PSMA1, PSMA2, PSMA3, PSMA4, PSMA5, PSMA6, PSMA8, PSMB1, PSMB2, PSMB3, PSMB4, PSMB6, PSMC2, PSMD13, PSMD2, PSMD4, PSME1, PSME2, RACK1, RBM8A, RPL12, RPL13, RPL22, RPL4, RPL7, RPL9, RPS11, RPS12, RPS18, RPS20, RPS24, RPS27A, SAMHD1, TARDBP, T…
GO:0034655	nucleobase-containing compound catabolic process	GO_BiologicalProcess-EBI-QuickGO-GOA_20.11.2017_00h00	7.48236e-22	4.59417e-19	8.62089e-23	1.81039e-21	[4, 5]	Group21	11.0057	58	None Specific Cluster	[AGO1, AGO3, CIRBP, EIF4A1, EIF4A2, HNRNPR, HSPA1A, KHSRP, LARP1, NCBP1, NT5C2, PSMB3, PSMB6, PSMC2, PSMD13, PSMD2, PSMD4, PSME1, RACK1, RBM8A, RPL12, RPL13, RPL7, RPL9, RPS11, RPS12, RPS20, RPS24, RPS27A, SAMHD1, TARDBP, UBB, YWHAB]	[AGO2, GPX1, HPRT1, HSPA8, LSM1, LSM4, PATL1, PSMA1, PSMA2, PSMA3, PSMA4, PSMA5, PSMA6, PSMA8, PSMB1, PSMB2, PSMB4, PSME2, RPL22, RPL4, RPS18, TYMP, UBC, VCP, YWHAZ]	56.8966	43.1034	[AGO1, AGO2, AGO3, CIRBP, EIF4A1, EIF4A2, GPX1, HNRNPR, HPRT1, HSPA1A, HSPA8, KHSRP, LARP1, LSM1, LSM4, NCBP1, NT5C2, PATL1, PSMA1, PSMA2, PSMA3, PSMA4, PSMA5, PSMA6, PSMA8, PSMB1, PSMB2, PSMB3, PSMB4, PSMB6, PSMC2, PSMD13, PSMD2, PSMD4, PSME1, PSME2, RACK1, RBM8A, RPL12, RPL13, RPL22, RPL4, RPL7, RPL9, RPS11, RPS12, RPS18, RPS20, RPS24, RPS27A, SAMHD1, TARDBP, TYMP, UBB, UBC, VCP, YWHAB, YWHAZ]
GO:0044265	cellular macromolecule catabolic process	GO_BiologicalProcess-EBI-QuickGO-GOA_20.11.2017_00h00	8.29417e-19	4.87697e-16	8.62089e-23	1.81039e-21	[4, 5]	Group21	7.2973	81	None Specific Cluster	[AGO1, AGO3, AP2S1, CASP8, CD2AP, CIRBP, CLTA, DDB1, EIF4A1, EIF4A2, EZR, GCLC, HNRNPR, HSPA1A, HUWE1, KHSRP, LARP1, NCBP1, NPLOC4, PLAA, PSMB3, PSMB6, PSMC2, PSMD13, PSMD2, PSMD4, PSME1, PTK2, RACK1, RAD23A, RANBP1, RBM8A, RPL12, RPL13, RPL7, RPL9, RPS11, RPS12, RPS20, RPS24, RPS27A, SQSTM1, TARDBP, UBB, UBE2L3, USP19, YOD1, YWHAB]	[AGO2, ALAD, CLTC, DNAJB12, GPX1, HSPA5, HSPA8, LSM1, LSM4, MSN, PATL1, PSMA1, PSMA2, PSMA3, PSMA4, PSMA5, PSMA6, PSMA8, PSMB1, PSMB2, PSMB4, PSME2, RAB7A, RAD23B, RDX, RPL22, RPL4, RPS18, UBC, UBR2, VCP, WFS1, YWHAZ]	59.2593	40.7407	[AGO1, AGO2, AGO3, ALAD, AP2S1, CASP8, CD2AP, CIRBP, CLTA, CLTC, DDB1, DNAJB12, EIF4A1, EIF4A2, EZR, GCLC, GPX1, HNRNPR, HSPA1A, HSPA5, HSPA8, HUWE1, KHSRP, LARP1, LSM1, LSM4, MSN, NCBP1, NPLOC4, PATL1, PLAA, PSMA1, PSMA2, PSMA3, PSMA4, PSMA5, PSMA6, PSMA8, PSMB1, PSMB2, PSMB3, PSMB4, PSMB6, PSMC2, PSMD13, PSMD2, PSMD4, PSME1, PSME2, PTK2, RAB7A, RACK1, RAD23A, RAD23B, RANBP1, RBM8A, RDX, RPL12, …
GO:0010608	posttranscriptional regulation of gene expression	GO_BiologicalProcess-EBI-QuickGO-GOA_20.11.2017_00h00	1.35283e-17	7.75169e-15	8.62089e-23	1.81039e-21	[5, 6]	Group21	9.70696	53	None Specific Cluster	[AGO1, AGO3, CIRBP, EEF2, EIF2S1, EIF4A2, EIF4H, EIF5A, GARS, HNRNPR, HSPA1A, ILF3, KHSRP, LARP1, NCBP1, NCL, PSMB3, PSMB6, PSMC2, PSMD13, PSMD2, PSMD4, PSME1, RACK1, RBM4B, RBM8A, RIDA, RPS27A, TARDBP, UBB, YWHAB]	[ACO1, AGO2, CDK5RAP1, GAPDH, HSPA8, MTPN, NUP210, PSMA1, PSMA2, PSMA3, PSMA4, PSMA5, PSMA6, PSMA8, PSMB1, PSMB2, PSMB4, PSME2, RAN, TGFBRAP1, UBC, YWHAZ]	58.4906	41.5094	[ACO1, AGO1, AGO2, AGO3, CDK5RAP1, CIRBP, EEF2, EIF2S1, EIF4A2, EIF4H, EIF5A, GAPDH, GARS, HNRNPR, HSPA1A, HSPA8, ILF3, KHSRP, LARP1, MTPN, NCBP1, NCL, NUP210, PSMA1, PSMA2, PSMA3, PSMA4, PSMA5, PSMA6, PSMA8, PSMB1, PSMB2, PSMB3, PSMB4, PSMB6, PSMC2, PSMD13, PSMD2, PSMD4, PSME1, PSME2, RACK1, RAN, RBM4B, RBM8A, RIDA, RPS27A, TARDBP, TGFBRAP1, UBB, UBC, YWHAB, YWHAZ]
GO:0006396	RNA processing	GO_BiologicalProcess-EBI-QuickGO-GOA_20.11.2017_00h00	2.45208e-10	1.1206e-07	8.62089e-23	1.81039e-21	[5, 6, 7]	Group21	6.01427	59	Specific for Cluster #1	[AARS, AGO1, AGO3, ALYREF, DHX15, GARS, HNRNPDL, HNRNPK, HNRNPL, HNRNPR, HNRNPUL1, HSPA1A, KHSRP, NCBP1, NONO, NOP2, PRDX6, RBM4B, RBM6, RBM8A, RBMX, RPL12, RPL13, RPL7, RPL9, RPS11, RPS12, RPS20, RPS24, RPS27A, RSL1D1, SART3, SCAF1, SFPQ, SNRNP200, SNRPG, SNU13, SRSF3, SRSF6, TARDBP, UBE2V1, WBP4, ZNF326]	[AGO2, BOP1, CDK5RAP1, DBR1, HNRNPA1, HSPA8, LSM1, LSM4, RPL22, RPL4, RPS18, SAP18, SNRPD3, SRSF1, SRSF2, SRSF4]	72.8814	27.1186	[AARS, AGO1, AGO2, AGO3, ALYREF, BOP1, CDK5RAP1, DBR1, DHX15, GARS, HNRNPA1, HNRNPDL, HNRNPK, HNRNPL, HNRNPR, HNRNPUL1, HSPA1A, HSPA8, KHSRP, LSM1, LSM4, NCBP1, NONO, NOP2, PRDX6, RBM4B, RBM6, RBM8A, RBMX, RPL12, RPL13, RPL22, RPL4, RPL7, RPL9, RPS11, RPS12, RPS18, RPS20, RPS24, RPS27A, RSL1D1, SAP18, SART3, SCAF1, SFPQ, SNRNP200, SNRPD3, SNRPG, SNU13, SRSF1, SRSF2, SRSF3, SRSF4, SRSF6, TARDBP, U…
GO:0016071	mRNA metabolic process	GO_BiologicalProcess-EBI-QuickGO-GOA_20.11.2017_00h00	4.90263e-25	3.03963e-22	8.62089e-23	1.81039e-21	[5, 6, 7]	Group21	9.36019	79	Specific for Cluster #1	[AGO1, AGO3, ALYREF, CIRBP, DHX15, EEF1D, EIF4A1, EIF4A2, HNRNPK, HNRNPL, HNRNPR, HNRNPUL1, HSPA1A, KHSRP, LARP1, NCBP1, NONO, PRDX6, PSMB3, PSMB6, PSMC2, PSMD13, PSMD2, PSMD4, PSME1, RBM4B, RBM8A, RBMX, RPL12, RPL13, RPL7, RPL9, RPS11, RPS12, RPS20, RPS24, RPS27A, SART3, SCAF1, SFPQ, SNRNP200, SNRPG, SNU13, SRSF3, SRSF6, TARDBP, UBB, UBE2V1, WBP4, YWHAB, ZNF326]	[AGO2, DBR1, HNRNPA1, HSPA8, LSM1, LSM4, PATL1, PSMA1, PSMA2, PSMA3, PSMA4, PSMA5, PSMA6, PSMA8, PSMB1, PSMB2, PSMB4, PSME2, RPL22, RPL4, RPS18, SAP18, SNRPD3, SRSF1, SRSF2, SRSF4, UBC, YWHAZ]	64.557	35.443	[AGO1, AGO2, AGO3, ALYREF, CIRBP, DBR1, DHX15, EEF1D, EIF4A1, EIF4A2, HNRNPA1, HNRNPK, HNRNPL, HNRNPR, HNRNPUL1, HSPA1A, HSPA8, KHSRP, LARP1, LSM1, LSM4, NCBP1, NONO, PATL1, PRDX6, PSMA1, PSMA2, PSMA3, PSMA4, PSMA5, PSMA6, PSMA8, PSMB1, PSMB2, PSMB3, PSMB4, PSMB6, PSMC2, PSMD13, PSMD2, PSMD4, PSME1, PSME2, RBM4B, RBM8A, RBMX, RPL12, RPL13, RPL22, RPL4, RPL7, RPL9, RPS11, RPS12, RPS18, RPS20, RPS2…
GO:0006402	mRNA catabolic process	GO_BiologicalProcess-EBI-QuickGO-GOA_20.11.2017_00h00	2.23011e-24	1.38044e-21	8.62089e-23	1.81039e-21	[5, 6, 7, 8]	Group21	14.2458	51	None Specific Cluster	[AGO1, AGO3, CIRBP, EIF4A1, EIF4A2, HNRNPR, HSPA1A, KHSRP, LARP1, NCBP1, PSMB3, PSMB6, PSMC2, PSMD13, PSMD2, PSMD4, PSME1, RBM8A, RPL12, RPL13, RPL7, RPL9, RPS11, RPS12, RPS20, RPS24, RPS27A, TARDBP, UBB, YWHAB]	[AGO2, HSPA8, LSM1, LSM4, PATL1, PSMA1, PSMA2, PSMA3, PSMA4, PSMA5, PSMA6, PSMA8, PSMB1, PSMB2, PSMB4, PSME2, RPL22, RPL4, RPS18, UBC, YWHAZ]	58.8235	41.1765	[AGO1, AGO2, AGO3, CIRBP, EIF4A1, EIF4A2, HNRNPR, HSPA1A, HSPA8, KHSRP, LARP1, LSM1, LSM4, NCBP1, PATL1, PSMA1, PSMA2, PSMA3, PSMA4, PSMA5, PSMA6, PSMA8, PSMB1, PSMB2, PSMB3, PSMB4, PSMB6, PSMC2, PSMD13, PSMD2, PSMD4, PSME1, PSME2, RBM8A, RPL12, RPL13, RPL22, RPL4, RPL7, RPL9, RPS11, RPS12, RPS18, RPS20, RPS24, RPS27A, TARDBP, UBB, UBC, YWHAB, YWHAZ]
GO:1903311	regulation of mRNA metabolic process	GO_BiologicalProcess-EBI-QuickGO-GOA_20.11.2017_00h00	9.75327e-22	5.97876e-19	8.62089e-23	1.81039e-21	[5, 6, 7, 8]	Group21	15.1408	43	None Specific Cluster	[CIRBP, HNRNPK, HNRNPL, HNRNPR, HSPA1A, KHSRP, LARP1, NCBP1, PRDX6, PSMB3, PSMB6, PSMC2, PSMD13, PSMD2, PSMD4, PSME1, RBM8A, RBMX, RPS27A, SRSF3, SRSF6, TARDBP, UBB, YWHAB]	[AGO2, HNRNPA1, HSPA8, PSMA1, PSMA2, PSMA3, PSMA4, PSMA5, PSMA6, PSMA8, PSMB1, PSMB2, PSMB4, PSME2, SAP18, SRSF2, SRSF4, UBC, YWHAZ]	55.814	44.186	[AGO2, CIRBP, HNRNPA1, HNRNPK, HNRNPL, HNRNPR, HSPA1A, HSPA8, KHSRP, LARP1, NCBP1, PRDX6, PSMA1, PSMA2, PSMA3, PSMA4, PSMA5, PSMA6, PSMA8, PSMB1, PSMB2, PSMB3, PSMB4, PSMB6, PSMC2, PSMD13, PSMD2, PSMD4, PSME1, PSME2, RBM8A, RBMX, RPS27A, SAP18, SRSF2, SRSF3, SRSF4, SRSF6, TARDBP, UBB, UBC, YWHAB, YWHAZ]
GO:0006397	mRNA processing	GO_BiologicalProcess-EBI-QuickGO-GOA_20.11.2017_00h00	1.68064e-08	7.0587e-06	8.62089e-23	1.81039e-21	[6, 7, 8]	Group21	7.08661	36	Specific for Cluster #1	[ALYREF, DHX15, HNRNPK, HNRNPL, HNRNPR, HNRNPUL1, HSPA1A, KHSRP, NCBP1, NONO, PRDX6, RBM4B, RBM8A, RBMX, SART3, SCAF1, SFPQ, SNRNP200, SNRPG, SNU13, SRSF3, SRSF6, TARDBP, UBE2V1, WBP4, ZNF326]	[DBR1, HNRNPA1, HSPA8, LSM1, LSM4, SAP18, SNRPD3, SRSF1, SRSF2, SRSF4]	72.2222	27.7778	[ALYREF, DBR1, DHX15, HNRNPA1, HNRNPK, HNRNPL, HNRNPR, HNRNPUL1, HSPA1A, HSPA8, KHSRP, LSM1, LSM4, NCBP1, NONO, PRDX6, RBM4B, RBM8A, RBMX, SAP18, SART3, SCAF1, SFPQ, SNRNP200, SNRPD3, SNRPG, SNU13, SRSF1, SRSF2, SRSF3, SRSF4, SRSF6, TARDBP, UBE2V1, WBP4, ZNF326]
GO:0008380	RNA splicing	GO_BiologicalProcess-EBI-QuickGO-GOA_20.11.2017_00h00	4.99416e-10	2.24737e-07	8.62089e-23	1.81039e-21	[6, 7, 8]	Group21	8.08989	36	Specific for Cluster #1	[ALYREF, DHX15, HNRNPK, HNRNPL, HNRNPR, HNRNPUL1, HSPA1A, KHSRP, NCBP1, NONO, PRDX6, RBM4B, RBM8A, RBMX, SART3, SCAF1, SFPQ, SNRNP200, SNRPG, SNU13, SRSF3, SRSF6, TARDBP, UBE2V1, WBP4, ZNF326]	[DBR1, HNRNPA1, HSPA8, LSM1, LSM4, SAP18, SNRPD3, SRSF1, SRSF2, SRSF4]	72.2222	27.7778	[ALYREF, DBR1, DHX15, HNRNPA1, HNRNPK, HNRNPL, HNRNPR, HNRNPUL1, HSPA1A, HSPA8, KHSRP, LSM1, LSM4, NCBP1, NONO, PRDX6, RBM4B, RBM8A, RBMX, SAP18, SART3, SCAF1, SFPQ, SNRNP200, SNRPD3, SNRPG, SNU13, SRSF1, SRSF2, SRSF3, SRSF4, SRSF6, TARDBP, UBE2V1, WBP4, ZNF326]
GO:0061013	regulation of mRNA catabolic process	GO_BiologicalProcess-EBI-QuickGO-GOA_20.11.2017_00h00	7.78824e-18	4.48603e-15	8.62089e-23	1.81039e-21	[5, 6, 7, 8, 9]	Group21	17.5141	31	None Specific Cluster	[CIRBP, HNRNPR, HSPA1A, KHSRP, LARP1, PSMB3, PSMB6, PSMC2, PSMD13, PSMD2, PSMD4, PSME1, RPS27A, TARDBP, UBB, YWHAB]	[AGO2, HSPA8, PSMA1, PSMA2, PSMA3, PSMA4, PSMA5, PSMA6, PSMA8, PSMB1, PSMB2, PSMB4, PSME2, UBC, YWHAZ]	51.6129	48.3871	[AGO2, CIRBP, HNRNPR, HSPA1A, HSPA8, KHSRP, LARP1, PSMA1, PSMA2, PSMA3, PSMA4, PSMA5, PSMA6, PSMA8, PSMB1, PSMB2, PSMB3, PSMB4, PSMB6, PSMC2, PSMD13, PSMD2, PSMD4, PSME1, PSME2, RPS27A, TARDBP, UBB, UBC, YWHAB, YWHAZ]
GO:0000375	RNA splicing, via transesterification reactions	GO_BiologicalProcess-EBI-QuickGO-GOA_20.11.2017_00h00	1.37328e-09	6.02869e-07	8.62089e-23	1.81039e-21	[7, 8, 9]	Group21	8.95522	30	Specific for Cluster #1	[ALYREF, DHX15, HNRNPK, HNRNPL, HNRNPR, HNRNPUL1, KHSRP, NCBP1, NONO, PRDX6, RBM8A, RBMX, SART3, SFPQ, SNRNP200, SNRPG, SNU13, SRSF3, SRSF6, WBP4]	[DBR1, HNRNPA1, HSPA8, LSM1, LSM4, SAP18, SNRPD3, SRSF1, SRSF2, SRSF4]	66.6667	33.3333	[ALYREF, DBR1, DHX15, HNRNPA1, HNRNPK, HNRNPL, HNRNPR, HNRNPUL1, HSPA8, KHSRP, LSM1, LSM4, NCBP1, NONO, PRDX6, RBM8A, RBMX, SAP18, SART3, SFPQ, SNRNP200, SNRPD3, SNRPG, SNU13, SRSF1, SRSF2, SRSF3, SRSF4, SRSF6, WBP4]
GO:0000398	mRNA splicing, via spliceosome	GO_BiologicalProcess-EBI-QuickGO-GOA_20.11.2017_00h00	1.8305e-08	7.66979e-06	8.62089e-23	1.81039e-21	[7, 8, 9, 10, 11]	Group21	8.43373	28	Specific for Cluster #1	[ALYREF, DHX15, HNRNPK, HNRNPL, HNRNPR, HNRNPUL1, NCBP1, NONO, PRDX6, RBM8A, RBMX, SART3, SFPQ, SNRNP200, SNRPG, SNU13, SRSF3, SRSF6, WBP4]	[DBR1, HNRNPA1, HSPA8, LSM4, SAP18, SNRPD3, SRSF1, SRSF2, SRSF4]	67.8571	32.1429	[ALYREF, DBR1, DHX15, HNRNPA1, HNRNPK, HNRNPL, HNRNPR, HNRNPUL1, HSPA8, LSM4, NCBP1, NONO, PRDX6, RBM8A, RBMX, SAP18, SART3, SFPQ, SNRNP200, SNRPD3, SNRPG, SNU13, SRSF1, SRSF2, SRSF3, SRSF4, SRSF6, WBP4]
KEGG:04141	Protein processing in endoplasmic reticulum	KEGG_20.11.2017	7.68301e-07	0.000296564	4.2475e-22	8.07026e-21	[-1]	Group22	10.303	17	None Specific Cluster	[EIF2S1, HSPA1A, HSPA2, NPLOC4, P4HB, PLAA, PREB, RAD23A, YOD1]	[DNAJB12, HSPA1L, HSPA5, HSPA6, HSPA8, RAD23B, VCP, WFS1]	52.9412	47.0588	[DNAJB12, EIF2S1, HSPA1A, HSPA1L, HSPA2, HSPA5, HSPA6, HSPA8, NPLOC4, P4HB, PLAA, PREB, RAD23A, RAD23B, VCP, WFS1, YOD1]
KEGG:04213	Longevity regulating pathway	KEGG_20.11.2017	0.000140233	0.0403872	4.2475e-22	8.07026e-21	[-1]	Group22	12.9032	8	None Specific Cluster	[CAT, HSPA1A, HSPA2, PRKAG3]	[HSPA1L, HSPA6, HSPA8, SOD1]	50	50	[CAT, HSPA1A, HSPA1L, HSPA2, HSPA6, HSPA8, PRKAG3, SOD1]
KEGG:04612	Antigen processing and presentation	KEGG_20.11.2017	1.97205e-05	0.00674441	4.2475e-22	8.07026e-21	[-1]	Group22	12.987	10	Specific for Cluster #2	[HSPA1A, HSPA2, HSPA4, PSME1]	[HLA-A, HSPA1L, HSPA5, HSPA6, HSPA8, PSME2]	40	60	[HLA-A, HSPA1A, HSPA1L, HSPA2, HSPA4, HSPA5, HSPA6, HSPA8, PSME1, PSME2]
KEGG:05134	Legionellosis	KEGG_20.11.2017	8.54945e-07	0.000329154	4.2475e-22	8.07026e-21	[-1]	Group22	18.1818	10	None Specific Cluster	[CASP8, HSPA1A, HSPA2, PYCARD, RAB1A]	[HSPA1L, HSPA6, HSPA8, RAB1B, VCP]	50	50	[CASP8, HSPA1A, HSPA1L, HSPA2, HSPA6, HSPA8, PYCARD, RAB1A, RAB1B, VCP]
KEGG:05164	Influenza A	KEGG_20.11.2017	0.000107783	0.0316881	4.2475e-22	8.07026e-21	[-1]	Group22	8.09249	14	Specific for Cluster #1	[ACTG1, EIF2S1, HNRNPUL1, HSPA1A, HSPA2, MX1, PRSS1, PRSS3, PYCARD, VDAC1]	[ACTB, HSPA1L, HSPA6, HSPA8]	71.4286	28.5714	[ACTB, ACTG1, EIF2S1, HNRNPUL1, HSPA1A, HSPA1L, HSPA2, HSPA6, HSPA8, MX1, PRSS1, PRSS3, PYCARD, VDAC1]
KEGG:05169	Epstein-Barr virus infection	KEGG_20.11.2017	4.86604e-05	0.0157173	4.2475e-22	8.07026e-21	[-1]	Group22	7.88177	16	None Specific Cluster	[HSPA1A, HSPA2, PSMC2, PSMD13, PSMD2, PSMD4, YWHAB]	[HLA-A, HSPA1L, HSPA6, HSPA8, RAN, YWHAE, YWHAG, YWHAQ, YWHAZ]	43.75	56.25	[HLA-A, HSPA1A, HSPA1L, HSPA2, HSPA6, HSPA8, PSMC2, PSMD13, PSMD2, PSMD4, RAN, YWHAB, YWHAE, YWHAG, YWHAQ, YWHAZ]
R-HSA:111447	Activation of BAD and translocation to mitochondria	REACTOME_Pathways_20.11.2017	2.23958e-05	0.00761458	4.2475e-22	8.07026e-21	[-1]	Group22	33.3333	5	Specific for Cluster #2	[YWHAB]	[YWHAE, YWHAG, YWHAQ, YWHAZ]	20	80	[YWHAB, YWHAE, YWHAG, YWHAQ, YWHAZ]
R-HSA:1445148	Translocation of GLUT4 to the plasma membrane	REACTOME_Pathways_20.11.2017	1.05812e-07	4.25365e-05	4.2475e-22	8.07026e-21	[-1]	Group22	15.8537	13	None Specific Cluster	[ACTG1, MYH7, PRKAG3, RAB11A, RAB8A, YWHAB]	[ACTB, CALM1, MYH8, YWHAE, YWHAG, YWHAQ, YWHAZ]	46.1538	53.8462	[ACTB, ACTG1, CALM1, MYH7, MYH8, PRKAG3, RAB11A, RAB8A, YWHAB, YWHAE, YWHAG, YWHAQ, YWHAZ]
R-HSA:199991	Membrane Trafficking	REACTOME_Pathways_20.11.2017	2.9961e-10	1.36023e-07	4.2475e-22	8.07026e-21	[-1]	Group22	7.04225	45	Specific for Cluster #1	[ACTG1, AP2S1, CLTA, COPA, COPB1, COPB2, COPS7A, DNM1, DNM2, DYNC1H1, GDI2, KIF15, MYH7, PAFAH1B1, PREB, PRKAG3, RAB11A, RAB11B, RAB1A, RAB5B, RAB5C, RAB8A, RPS27A, SPTAN1, SPTBN4, TBC1D17, TBC1D8B, TSC2, UBB, YWHAB]	[ACTB, CALM1, CAPZB, CLTC, FTH1, HSPA8, MYH8, RAB1B, RAB7A, TF, UBC, YWHAE, YWHAG, YWHAQ, YWHAZ]	66.6667	33.3333	[ACTB, ACTG1, AP2S1, CALM1, CAPZB, CLTA, CLTC, COPA, COPB1, COPB2, COPS7A, DNM1, DNM2, DYNC1H1, FTH1, GDI2, HSPA8, KIF15, MYH7, MYH8, PAFAH1B1, PREB, PRKAG3, RAB11A, RAB11B, RAB1A, RAB1B, RAB5B, RAB5C, RAB7A, RAB8A, RPS27A, SPTAN1, SPTBN4, TBC1D17, TBC1D8B, TF, TSC2, UBB, UBC, YWHAB, YWHAE, YWHAG, YWHAQ, YWHAZ]
R-HSA:3371453	Regulation of HSF1-mediated heat shock response	REACTOME_Pathways_20.11.2017	6.37534e-06	0.00229512	4.2475e-22	8.07026e-21	[-1]	Group22	14.7059	10	Specific for Cluster #2	[HSPA1A, HSPA2, HSPA4, HSPA9]	[HSPA1L, HSPA5, HSPA6, HSPA8, NUP210, YWHAE]	40	60	[HSPA1A, HSPA1L, HSPA2, HSPA4, HSPA5, HSPA6, HSPA8, HSPA9, NUP210, YWHAE]
R-HSA:3371556	Cellular response to heat stress	REACTOME_Pathways_20.11.2017	1.10524e-05	0.00385728	4.2475e-22	8.07026e-21	[-1]	Group22	12.5	11	Specific for Cluster #2	[HSPA1A, HSPA2, HSPA4, HSPA9]	[HSPA1L, HSPA5, HSPA6, HSPA8, NUP210, VCP, YWHAE]	36.3636	63.6364	[HSPA1A, HSPA1L, HSPA2, HSPA4, HSPA5, HSPA6, HSPA8, HSPA9, NUP210, VCP, YWHAE]
R-HSA:5628897	TP53 Regulates Metabolic Genes	REACTOME_Pathways_20.11.2017	2.80784e-08	1.15683e-05	4.2475e-22	8.07026e-21	[-1]	Group22	16.092	14	None Specific Cluster	[AGO1, AGO3, G6PD, GPX2, PRDX1, PRKAG3, TSC2, YWHAB]	[AGO2, TXN, YWHAE, YWHAG, YWHAQ, YWHAZ]	57.1429	42.8571	[AGO1, AGO2, AGO3, G6PD, GPX2, PRDX1, PRKAG3, TSC2, TXN, YWHAB, YWHAE, YWHAG, YWHAQ, YWHAZ]
R-HSA:5653656	Vesicle-mediated transport	REACTOME_Pathways_20.11.2017	1.95557e-09	8.50671e-07	4.2475e-22	8.07026e-21	[-1]	Group22	6.63717	45	Specific for Cluster #1	[ACTG1, AP2S1, CLTA, COPA, COPB1, COPB2, COPS7A, DNM1, DNM2, DYNC1H1, GDI2, KIF15, MYH7, PAFAH1B1, PREB, PRKAG3, RAB11A, RAB11B, RAB1A, RAB5B, RAB5C, RAB8A, RPS27A, SPTAN1, SPTBN4, TBC1D17, TBC1D8B, TSC2, UBB, YWHAB]	[ACTB, CALM1, CAPZB, CLTC, FTH1, HSPA8, MYH8, RAB1B, RAB7A, TF, UBC, YWHAE, YWHAG, YWHAQ, YWHAZ]	66.6667	33.3333	[ACTB, ACTG1, AP2S1, CALM1, CAPZB, CLTA, CLTC, COPA, COPB1, COPB2, COPS7A, DNM1, DNM2, DYNC1H1, FTH1, GDI2, HSPA8, KIF15, MYH7, MYH8, PAFAH1B1, PREB, PRKAG3, RAB11A, RAB11B, RAB1A, RAB1B, RAB5B, RAB5C, RAB7A, RAB8A, RPS27A, SPTAN1, SPTBN4, TBC1D17, TBC1D8B, TF, TSC2, UBB, UBC, YWHAB, YWHAE, YWHAG, YWHAQ, YWHAZ]
R-HSA:75035	Chk1/Chk2(Cds1) mediated inactivation of Cyclin B:Cdk1 complex	REACTOME_Pathways_20.11.2017	1.00009e-05	0.0035103	4.2475e-22	8.07026e-21	[-1]	Group22	38.4615	5	Specific for Cluster #2	[YWHAB]	[YWHAE, YWHAG, YWHAQ, YWHAZ]	20	80	[YWHAB, YWHAE, YWHAG, YWHAQ, YWHAZ]
WP:2359	Parkin-Ubiquitin Proteasomal System pathway	WikiPathways_20.11.2017	1.34752e-10	6.21207e-08	4.2475e-22	8.07026e-21	[-1]	Group22	21.4286	15	Specific for Cluster #1	[CASP8, CCNE1, HSPA1A, HSPA2, HSPA4, HSPA9, PSMC2, PSMD13, PSMD2, PSMD4, UBE2L3]	[HSPA1L, HSPA5, HSPA6, HSPA8]	73.3333	26.6667	[CASP8, CCNE1, HSPA1A, HSPA1L, HSPA2, HSPA4, HSPA5, HSPA6, HSPA8, HSPA9, PSMC2, PSMD13, PSMD2, PSMD4, UBE2L3]
WP:289	Myometrial Relaxation and Contraction Pathways	WikiPathways_20.11.2017	0.000149926	0.042429	4.2475e-22	8.07026e-21	[-1]	Group22	8.28025	13	None Specific Cluster	[ACTA1, ACTG1, GNB3, GSTO1, NOS1, YWHAB]	[ACTA2, ACTB, CALM1, YWHAE, YWHAG, YWHAQ, YWHAZ]	46.1538	53.8462	[ACTA1, ACTA2, ACTB, ACTG1, CALM1, GNB3, GSTO1, NOS1, YWHAB, YWHAE, YWHAG, YWHAQ, YWHAZ]
GO:0035966	response to topologically incorrect protein	GO_BiologicalProcess-EBI-QuickGO-GOA_20.11.2017_00h00	9.34002e-06	0.00329703	4.2475e-22	8.07026e-21	[3, 4]	Group22	8.58586	17	None Specific Cluster	[EIF2S1, HDGF, HSPA1A, HSPA2, HSPA4, LMNA, MYDGF, PREB, RACK1, YOD1]	[DNAJB12, HSPA1L, HSPA5, HSPA6, HSPA8, VCP, WFS1]	58.8235	41.1765	[DNAJB12, EIF2S1, HDGF, HSPA1A, HSPA1L, HSPA2, HSPA4, HSPA5, HSPA6, HSPA8, LMNA, MYDGF, PREB, RACK1, VCP, WFS1, YOD1]
GO:0034976	response to endoplasmic reticulum stress	GO_BiologicalProcess-EBI-QuickGO-GOA_20.11.2017_00h00	9.69999e-05	0.028906	4.2475e-22	8.07026e-21	[4]	Group22	6.66667	19	Specific for Cluster #1	[EEF2, EIF2S1, FLOT1, HDGF, HSPA1A, LMNA, MYDGF, NPLOC4, P4HB, PREB, PSMC2, RACK1, TARDBP, USP19, YOD1]	[DNAJB12, HSPA5, VCP, WFS1]	78.9474	21.0526	[DNAJB12, EEF2, EIF2S1, FLOT1, HDGF, HSPA1A, HSPA5, LMNA, MYDGF, NPLOC4, P4HB, PREB, PSMC2, RACK1, TARDBP, USP19, VCP, WFS1, YOD1]
GO:0008637	apoptotic mitochondrial changes	GO_BiologicalProcess-EBI-QuickGO-GOA_20.11.2017_00h00	2.92013e-05	0.00969483	4.2475e-22	8.07026e-21	[5]	Group22	9.70149	13	Specific for Cluster #1	[ACAA2, CASP8, GCLC, HSPA1A, LMNA, PDCD5, PYCARD, YWHAB]	[GPX1, YWHAE, YWHAG, YWHAQ, YWHAZ]	61.5385	38.4615	[ACAA2, CASP8, GCLC, GPX1, HSPA1A, LMNA, PDCD5, PYCARD, YWHAB, YWHAE, YWHAG, YWHAQ, YWHAZ]
GO:0072657	protein localization to membrane	GO_BiologicalProcess-EBI-QuickGO-GOA_20.11.2017_00h00	4.9338e-08	2.01299e-05	4.2475e-22	8.07026e-21	[5]	Group22	6.6787	37	Specific for Cluster #1	[ATP1B1, CASP8, CLIP1, DMTN, EZR, FLOT1, HSPA4, MTCL1, PDCD5, RAB11A, RAB11B, RAB8A, RACK1, RPL12, RPL13, RPL7, RPL9, RPS11, RPS12, RPS20, RPS24, RPS27A, SPTBN4, SQSTM1, TNIK, YWHAB]	[AGRN, CLTC, DNAJA3, RDX, RPL22, RPL4, RPS18, YWHAE, YWHAG, YWHAQ, YWHAZ]	70.2703	29.7297	[AGRN, ATP1B1, CASP8, CLIP1, CLTC, DMTN, DNAJA3, EZR, FLOT1, HSPA4, MTCL1, PDCD5, RAB11A, RAB11B, RAB8A, RACK1, RDX, RPL12, RPL13, RPL22, RPL4, RPL7, RPL9, RPS11, RPS12, RPS18, RPS20, RPS24, RPS27A, SPTBN4, SQSTM1, TNIK, YWHAB, YWHAE, YWHAG, YWHAQ, YWHAZ]
GO:0090150	establishment of protein localization to membrane	GO_BiologicalProcess-EBI-QuickGO-GOA_20.11.2017_00h00	1.44595e-09	6.31879e-07	4.2475e-22	8.07026e-21	[4, 5, 6]	Group22	9.45946	28	Specific for Cluster #1	[ATP1B1, CASP8, CLIP1, DMTN, HSPA4, MTCL1, PDCD5, RAB11A, RAB11B, RAB8A, RACK1, RPL12, RPL13, RPL7, RPL9, RPS11, RPS12, RPS20, RPS24, RPS27A, YWHAB]	[RPL22, RPL4, RPS18, YWHAE, YWHAG, YWHAQ, YWHAZ]	75	25	[ATP1B1, CASP8, CLIP1, DMTN, HSPA4, MTCL1, PDCD5, RAB11A, RAB11B, RAB8A, RACK1, RPL12, RPL13, RPL22, RPL4, RPL7, RPL9, RPS11, RPS12, RPS18, RPS20, RPS24, RPS27A, YWHAB, YWHAE, YWHAG, YWHAQ, YWHAZ]
GO:1905477	positive regulation of protein localization to membrane	GO_BiologicalProcess-EBI-QuickGO-GOA_20.11.2017_00h00	4.74074e-05	0.01536	4.2475e-22	8.07026e-21	[3, 4, 5, 6, 7]	Group22	9.91736	12	Specific for Cluster #1	[CASP8, EZR, MTCL1, PDCD5, RAB11A, RACK1, SQSTM1, YWHAB]	[YWHAE, YWHAG, YWHAQ, YWHAZ]	66.6667	33.3333	[CASP8, EZR, MTCL1, PDCD5, RAB11A, RACK1, SQSTM1, YWHAB, YWHAE, YWHAG, YWHAQ, YWHAZ]
GO:0010821	regulation of mitochondrion organization	GO_BiologicalProcess-EBI-QuickGO-GOA_20.11.2017_00h00	4.02938e-06	0.00147475	4.2475e-22	8.07026e-21	[5, 6]	Group22	8.06452	20	Specific for Cluster #1	[ACAA2, CASP8, HSPA1A, HUWE1, LMNA, NPEPPS, PDCD5, PYCARD, SQSTM1, TSC2, UBE2L3, VDAC1, YWHAB]	[GPX1, HSPA1L, MYBPC1, YWHAE, YWHAG, YWHAQ, YWHAZ]	65	35	[ACAA2, CASP8, GPX1, HSPA1A, HSPA1L, HUWE1, LMNA, MYBPC1, NPEPPS, PDCD5, PYCARD, SQSTM1, TSC2, UBE2L3, VDAC1, YWHAB, YWHAE, YWHAG, YWHAQ, YWHAZ]
GO:1905475	regulation of protein localization to membrane	GO_BiologicalProcess-EBI-QuickGO-GOA_20.11.2017_00h00	6.90837e-05	0.0216232	4.2475e-22	8.07026e-21	[5, 6]	Group22	8.43373	14	Specific for Cluster #1	[CASP8, DMTN, EZR, MTCL1, PDCD5, RAB11A, RACK1, SQSTM1, YWHAB]	[CLTC, YWHAE, YWHAG, YWHAQ, YWHAZ]	64.2857	35.7143	[CASP8, CLTC, DMTN, EZR, MTCL1, PDCD5, RAB11A, RACK1, SQSTM1, YWHAB, YWHAE, YWHAG, YWHAQ, YWHAZ]
GO:2001233	regulation of apoptotic signaling pathway	GO_BiologicalProcess-EBI-QuickGO-GOA_20.11.2017_00h00	2.38358e-06	0.000891458	4.2475e-22	8.07026e-21	[4, 5, 6, 7]	Group22	6.65083	28	Specific for Cluster #1	[ACAA2, CASP8, ETFB, GCLC, HNRNPK, HSPA1A, LMNA, NONO, P4HB, PDCD5, PYCARD, QARS, RACK1, SFPQ, TPT1, UBB, VDAC2, YWHAB]	[FADD, GPX1, NME5, SOD1, TGFBRAP1, WFS1, YWHAE, YWHAG, YWHAQ, YWHAZ]	64.2857	35.7143	[ACAA2, CASP8, ETFB, FADD, GCLC, GPX1, HNRNPK, HSPA1A, LMNA, NME5, NONO, P4HB, PDCD5, PYCARD, QARS, RACK1, SFPQ, SOD1, TGFBRAP1, TPT1, UBB, VDAC2, WFS1, YWHAB, YWHAE, YWHAG, YWHAQ, YWHAZ]
GO:1903749	positive regulation of establishment of protein localization to mitochondrion	GO_BiologicalProcess-EBI-QuickGO-GOA_20.11.2017_00h00	6.52775e-05	0.0206277	4.2475e-22	8.07026e-21	[3, 4, 5, 6, 7, 8, 9]	Group22	9.6	12	None Specific Cluster	[CASP8, HUWE1, NPEPPS, PDCD5, UBE2L3, YWHAB]	[HSPA1L, MYBPC1, YWHAE, YWHAG, YWHAQ, YWHAZ]	50	50	[CASP8, HSPA1L, HUWE1, MYBPC1, NPEPPS, PDCD5, UBE2L3, YWHAB, YWHAE, YWHAG, YWHAQ, YWHAZ]
GO:0006605	protein targeting	GO_BiologicalProcess-EBI-QuickGO-GOA_20.11.2017_00h00	2.81445e-07	0.000110327	4.2475e-22	8.07026e-21	[5, 6, 7, 8, 9]	Group22	7.07547	30	Specific for Cluster #1	[DMTN, HSPA4, HUWE1, LARS, MTCL1, NPEPPS, PDCD5, RPL12, RPL13, RPL7, RPL9, RPS11, RPS12, RPS20, RPS24, RPS27A, TIMM44, UBE2L3, YWHAB]	[HSPA1L, HSPA8, MYBPC1, RAB7A, RPL22, RPL4, RPS18, YWHAE, YWHAG, YWHAQ, YWHAZ]	63.3333	36.6667	[DMTN, HSPA1L, HSPA4, HSPA8, HUWE1, LARS, MTCL1, MYBPC1, NPEPPS, PDCD5, RAB7A, RPL12, RPL13, RPL22, RPL4, RPL7, RPL9, RPS11, RPS12, RPS18, RPS20, RPS24, RPS27A, TIMM44, UBE2L3, YWHAB, YWHAE, YWHAG, YWHAQ, YWHAZ]
GO:1901028	regulation of mitochondrial outer membrane permeabilization involved in apoptotic signaling pathway	GO_BiologicalProcess-EBI-QuickGO-GOA_20.11.2017_00h00	2.88643e-05	0.00964068	4.2475e-22	8.07026e-21	[5, 6, 7, 8, 9, 10, 11]	Group22	16	8	None Specific Cluster	[ACAA2, CASP8, HSPA1A, YWHAB]	[YWHAE, YWHAG, YWHAQ, YWHAZ]	50	50	[ACAA2, CASP8, HSPA1A, YWHAB, YWHAE, YWHAG, YWHAQ, YWHAZ]
GO:1900740	positive regulation of protein insertion into mitochondrial membrane involved in apoptotic signaling pathway	GO_BiologicalProcess-EBI-QuickGO-GOA_20.11.2017_00h00	0.000117688	0.0344826	4.2475e-22	8.07026e-21	[4, 5, 6, 7, 8, 9, 10, 11, 12, 13]	Group22	18.75	6	Specific for Cluster #2	[CASP8, YWHAB]	[YWHAE, YWHAG, YWHAQ, YWHAZ]	33.3333	66.6667	[CASP8, YWHAB, YWHAE, YWHAG, YWHAQ, YWHAZ]
KEGG:03040	Spliceosome	KEGG_20.11.2017	1.96763e-12	9.66107e-10	3.93901e-24	9.05973e-23	[-1]	Group23	16.4179	22	None Specific Cluster	[ALYREF, DHX15, HNRNPK, HSPA1A, HSPA2, NCBP1, RBM8A, RBMX, SNRNP200, SNRPG, SNU13, SRSF3, SRSF6]	[HNRNPA1, HSPA1L, HSPA6, HSPA8, LSM4, SNRPD3, SRSF1, SRSF2, SRSF4]	59.0909	40.9091	[ALYREF, DHX15, HNRNPA1, HNRNPK, HSPA1A, HSPA1L, HSPA2, HSPA6, HSPA8, LSM4, NCBP1, RBM8A, RBMX, SNRNP200, SNRPD3, SNRPG, SNU13, SRSF1, SRSF2, SRSF3, SRSF4, SRSF6]
R-HSA:109688	Cleavage of Growing Transcript in the Termination Region	REACTOME_Pathways_20.11.2017	5.55925e-06	0.00200689	3.93901e-24	9.05973e-23	[-1]	Group23	14.9254	10	Specific for Cluster #1	[ALYREF, NCBP1, RBM8A, SNRPG, SRSF3, SRSF6]	[SNRPD3, SRSF1, SRSF2, SRSF4]	60	40	[ALYREF, NCBP1, RBM8A, SNRPD3, SNRPG, SRSF1, SRSF2, SRSF3, SRSF4, SRSF6]
R-HSA:159236	Transport of Mature mRNA derived from an Intron-Containing Transcript	REACTOME_Pathways_20.11.2017	8.65855e-05	0.0262354	3.93901e-24	9.05973e-23	[-1]	Group23	12.1622	9	None Specific Cluster	[ALYREF, NCBP1, RBM8A, SRSF3, SRSF6]	[NUP210, SRSF1, SRSF2, SRSF4]	55.5556	44.4444	[ALYREF, NCBP1, NUP210, RBM8A, SRSF1, SRSF2, SRSF3, SRSF4, SRSF6]
R-HSA:72163	mRNA Splicing - Major Pathway	REACTOME_Pathways_20.11.2017	1.71699e-10	7.89817e-08	3.93901e-24	9.05973e-23	[-1]	Group23	12.5683	23	Specific for Cluster #1	[ALYREF, DHX15, HNRNPK, HNRNPL, HNRNPR, HNRNPUL1, NCBP1, RBM8A, RBMX, SNRNP200, SNRPG, SNU13, SNURF, SRSF3, SRSF6, WBP4]	[HNRNPA1, HSPA8, LSM4, SNRPD3, SRSF1, SRSF2, SRSF4]	69.5652	30.4348	[ALYREF, DHX15, HNRNPA1, HNRNPK, HNRNPL, HNRNPR, HNRNPUL1, HSPA8, LSM4, NCBP1, RBM8A, RBMX, SNRNP200, SNRPD3, SNRPG, SNU13, SNURF, SRSF1, SRSF2, SRSF3, SRSF4, SRSF6, WBP4]
R-HSA:72165	mRNA Splicing - Minor Pathway	REACTOME_Pathways_20.11.2017	3.8744e-05	0.0126306	3.93901e-24	9.05973e-23	[-1]	Group23	15.3846	8	Specific for Cluster #1	[NCBP1, SNRNP200, SNRPG, SNU13, SRSF6]	[SNRPD3, SRSF1, SRSF2]	62.5	37.5	[NCBP1, SNRNP200, SNRPD3, SNRPG, SNU13, SRSF1, SRSF2, SRSF6]
R-HSA:72172	mRNA Splicing	REACTOME_Pathways_20.11.2017	4.07537e-10	1.83799e-07	3.93901e-24	9.05973e-23	[-1]	Group23	12.0419	23	Specific for Cluster #1	[ALYREF, DHX15, HNRNPK, HNRNPL, HNRNPR, HNRNPUL1, NCBP1, RBM8A, RBMX, SNRNP200, SNRPG, SNU13, SNURF, SRSF3, SRSF6, WBP4]	[HNRNPA1, HSPA8, LSM4, SNRPD3, SRSF1, SRSF2, SRSF4]	69.5652	30.4348	[ALYREF, DHX15, HNRNPA1, HNRNPK, HNRNPL, HNRNPR, HNRNPUL1, HSPA8, LSM4, NCBP1, RBM8A, RBMX, SNRNP200, SNRPD3, SNRPG, SNU13, SNURF, SRSF1, SRSF2, SRSF3, SRSF4, SRSF6, WBP4]
R-HSA:72187	mRNA 3'-end processing	REACTOME_Pathways_20.11.2017	8.66742e-05	0.0261756	3.93901e-24	9.05973e-23	[-1]	Group23	13.7931	8	Specific for Cluster #1	[ALYREF, NCBP1, RBM8A, SRSF3, SRSF6]	[SRSF1, SRSF2, SRSF4]	62.5	37.5	[ALYREF, NCBP1, RBM8A, SRSF1, SRSF2, SRSF3, SRSF4, SRSF6]
R-HSA:72203	Processing of Capped Intron-Containing Pre-mRNA	REACTOME_Pathways_20.11.2017	9.46912e-09	4.00544e-06	3.93901e-24	9.05973e-23	[-1]	Group23	9.87654	24	Specific for Cluster #1	[ALYREF, DHX15, HNRNPK, HNRNPL, HNRNPR, HNRNPUL1, NCBP1, RBM8A, RBMX, SNRNP200, SNRPG, SNU13, SNURF, SRSF3, SRSF6, WBP4]	[HNRNPA1, HSPA8, LSM4, NUP210, SNRPD3, SRSF1, SRSF2, SRSF4]	66.6667	33.3333	[ALYREF, DHX15, HNRNPA1, HNRNPK, HNRNPL, HNRNPR, HNRNPUL1, HSPA8, LSM4, NCBP1, NUP210, RBM8A, RBMX, SNRNP200, SNRPD3, SNRPG, SNU13, SNURF, SRSF1, SRSF2, SRSF3, SRSF4, SRSF6, WBP4]
R-HSA:73856	RNA Polymerase II Transcription Termination	REACTOME_Pathways_20.11.2017	5.55925e-06	0.00200689	3.93901e-24	9.05973e-23	[-1]	Group23	14.9254	10	Specific for Cluster #1	[ALYREF, NCBP1, RBM8A, SNRPG, SRSF3, SRSF6]	[SNRPD3, SRSF1, SRSF2, SRSF4]	60	40	[ALYREF, NCBP1, RBM8A, SNRPD3, SNRPG, SRSF1, SRSF2, SRSF3, SRSF4, SRSF6]
R-HSA:8953854	Metabolism of RNA	REACTOME_Pathways_20.11.2017	2.86212e-23	1.76879e-20	3.93901e-24	9.05973e-23	[-1]	Group23	10.0443	68	None Specific Cluster	[ALYREF, DHX15, EIF4A1, EIF4A2, HNRNPK, HNRNPL, HNRNPR, HNRNPUL1, HSPA1A, KHSRP, NCBP1, NCL, NOP2, PSMB3, PSMB6, PSMC2, PSMD13, PSMD2, PSMD4, PSME1, RBM8A, RBMX, RPL12, RPL13, RPL7, RPL9, RPS11, RPS12, RPS20, RPS24, RPS27A, SNRNP200, SNRPG, SNU13, SNURF, SRSF3, SRSF6, UBB, WBP4, YWHAB]	[BOP1, HNRNPA1, HSPA8, LSM1, LSM4, NUP210, PATL1, PSMA1, PSMA2, PSMA3, PSMA4, PSMA5, PSMA6, PSMA8, PSMB1, PSMB2, PSMB4, PSME2, RAN, RPL22, RPL4, RPS18, SNRPD3, SRSF1, SRSF2, SRSF4, UBC, YWHAZ]	58.8235	41.1765	[ALYREF, BOP1, DHX15, EIF4A1, EIF4A2, HNRNPA1, HNRNPK, HNRNPL, HNRNPR, HNRNPUL1, HSPA1A, HSPA8, KHSRP, LSM1, LSM4, NCBP1, NCL, NOP2, NUP210, PATL1, PSMA1, PSMA2, PSMA3, PSMA4, PSMA5, PSMA6, PSMA8, PSMB1, PSMB2, PSMB3, PSMB4, PSMB6, PSMC2, PSMD13, PSMD2, PSMD4, PSME1, PSME2, RAN, RBM8A, RBMX, RPL12, RPL13, RPL22, RPL4, RPL7, RPL9, RPS11, RPS12, RPS18, RPS20, RPS24, RPS27A, SNRNP200, SNRPD3, SNRPG,…
WP:411	mRNA Processing	WikiPathways_20.11.2017	2.42124e-09	1.05082e-06	3.93901e-24	9.05973e-23	[-1]	Group23	14.1732	18	Specific for Cluster #1	[DHX15, HNRNPAB, HNRNPK, HNRNPL, HNRNPR, NCBP1, NONO, RBMX, SFPQ, SNRPG, SNU13, SRSF3, SRSF6]	[HNRNPA1, SNRPD3, SRSF1, SRSF2, SRSF4]	72.2222	27.7778	[DHX15, HNRNPA1, HNRNPAB, HNRNPK, HNRNPL, HNRNPR, NCBP1, NONO, RBMX, SFPQ, SNRPD3, SNRPG, SNU13, SRSF1, SRSF2, SRSF3, SRSF4, SRSF6]
GO:0000380	alternative mRNA splicing, via spliceosome	GO_BiologicalProcess-EBI-QuickGO-GOA_20.11.2017_00h00	7.54756e-06	0.00267938	3.93901e-24	9.05973e-23	[8, 9, 10, 11, 12]	Group23	16.3636	9	None Specific Cluster	[HNRNPL, RBM8A, RBMX, SFPQ, SRSF6]	[HNRNPA1, SAP18, SRSF1, SRSF2]	55.5556	44.4444	[HNRNPA1, HNRNPL, RBM8A, RBMX, SAP18, SFPQ, SRSF1, SRSF2, SRSF6]
GO:0000381	regulation of alternative mRNA splicing, via spliceosome	GO_BiologicalProcess-EBI-QuickGO-GOA_20.11.2017_00h00	6.99401e-05	0.0218213	3.93901e-24	9.05973e-23	[7, 8, 9, 10, 11, 12, 13]	Group23	16.6667	7	None Specific Cluster	[HNRNPL, RBM8A, RBMX, SRSF6]	[HNRNPA1, SAP18, SRSF2]	57.1429	42.8571	[HNRNPA1, HNRNPL, RBM8A, RBMX, SAP18, SRSF2, SRSF6]
GO:0006403	RNA localization	GO_BiologicalProcess-EBI-QuickGO-GOA_20.11.2017_00h00	0.000152796	0.0430885	3.93901e-24	9.05973e-23	[3]	Group23	6.88259	17	Specific for Cluster #1	[ALYREF, CCT6A, EIF5A, FLOT1, KHSRP, MMAB, NCBP1, RANBP1, RBM8A, SRSF3, SRSF6]	[HNRNPA1, NUP210, RAN, SRSF1, SRSF2, SRSF4]	64.7059	35.2941	[ALYREF, CCT6A, EIF5A, FLOT1, HNRNPA1, KHSRP, MMAB, NCBP1, NUP210, RAN, RANBP1, RBM8A, SRSF1, SRSF2, SRSF3, SRSF4, SRSF6]
GO:0022613	ribonucleoprotein complex biogenesis	GO_BiologicalProcess-EBI-QuickGO-GOA_20.11.2017_00h00	2.69295e-08	1.11488e-05	3.93901e-24	9.05973e-23	[3]	Group23	7.08502	35	Specific for Cluster #1	[AGO1, AGO3, CIRBP, DYNC1H1, EIF2S1, EIF4H, MMAB, NCBP1, NOP2, RBMX, RPL12, RPL13, RPL7, RPL9, RPS11, RPS12, RPS20, RPS24, RPS27A, RSL1D1, SART3, SNRNP200, SNRPG, SNU13, SRSF6]	[AGO2, BOP1, LSM4, PATL1, RAN, RPL22, RPL4, RPS18, SNRPD3, SRSF1]	71.4286	28.5714	[AGO1, AGO2, AGO3, BOP1, CIRBP, DYNC1H1, EIF2S1, EIF4H, LSM4, MMAB, NCBP1, NOP2, PATL1, RAN, RBMX, RPL12, RPL13, RPL22, RPL4, RPL7, RPL9, RPS11, RPS12, RPS18, RPS20, RPS24, RPS27A, RSL1D1, SART3, SNRNP200, SNRPD3, SNRPG, SNU13, SRSF1, SRSF6]
GO:0022618	ribonucleoprotein complex assembly	GO_BiologicalProcess-EBI-QuickGO-GOA_20.11.2017_00h00	4.02654e-08	1.64685e-05	3.93901e-24	9.05973e-23	[4, 5, 6]	Group23	9.86547	22	Specific for Cluster #1	[AGO1, AGO3, CIRBP, DYNC1H1, EIF2S1, EIF4H, MMAB, NCBP1, NOP2, RBMX, RPL12, SART3, SNRNP200, SNRPG, SNU13, SRSF6]	[AGO2, BOP1, LSM4, PATL1, SNRPD3, SRSF1]	72.7273	27.2727	[AGO1, AGO2, AGO3, BOP1, CIRBP, DYNC1H1, EIF2S1, EIF4H, LSM4, MMAB, NCBP1, NOP2, PATL1, RBMX, RPL12, SART3, SNRNP200, SNRPD3, SNRPG, SNU13, SRSF1, SRSF6]
GO:0006396	RNA processing	GO_BiologicalProcess-EBI-QuickGO-GOA_20.11.2017_00h00	2.45208e-10	1.1206e-07	3.93901e-24	9.05973e-23	[5, 6, 7]	Group23	6.01427	59	Specific for Cluster #1	[AARS, AGO1, AGO3, ALYREF, DHX15, GARS, HNRNPDL, HNRNPK, HNRNPL, HNRNPR, HNRNPUL1, HSPA1A, KHSRP, NCBP1, NONO, NOP2, PRDX6, RBM4B, RBM6, RBM8A, RBMX, RPL12, RPL13, RPL7, RPL9, RPS11, RPS12, RPS20, RPS24, RPS27A, RSL1D1, SART3, SCAF1, SFPQ, SNRNP200, SNRPG, SNU13, SRSF3, SRSF6, TARDBP, UBE2V1, WBP4, ZNF326]	[AGO2, BOP1, CDK5RAP1, DBR1, HNRNPA1, HSPA8, LSM1, LSM4, RPL22, RPL4, RPS18, SAP18, SNRPD3, SRSF1, SRSF2, SRSF4]	72.8814	27.1186	[AARS, AGO1, AGO2, AGO3, ALYREF, BOP1, CDK5RAP1, DBR1, DHX15, GARS, HNRNPA1, HNRNPDL, HNRNPK, HNRNPL, HNRNPR, HNRNPUL1, HSPA1A, HSPA8, KHSRP, LSM1, LSM4, NCBP1, NONO, NOP2, PRDX6, RBM4B, RBM6, RBM8A, RBMX, RPL12, RPL13, RPL22, RPL4, RPL7, RPL9, RPS11, RPS12, RPS18, RPS20, RPS24, RPS27A, RSL1D1, SAP18, SART3, SCAF1, SFPQ, SNRNP200, SNRPD3, SNRPG, SNU13, SRSF1, SRSF2, SRSF3, SRSF4, SRSF6, TARDBP, U…
GO:0016071	mRNA metabolic process	GO_BiologicalProcess-EBI-QuickGO-GOA_20.11.2017_00h00	4.90263e-25	3.03963e-22	3.93901e-24	9.05973e-23	[5, 6, 7]	Group23	9.36019	79	Specific for Cluster #1	[AGO1, AGO3, ALYREF, CIRBP, DHX15, EEF1D, EIF4A1, EIF4A2, HNRNPK, HNRNPL, HNRNPR, HNRNPUL1, HSPA1A, KHSRP, LARP1, NCBP1, NONO, PRDX6, PSMB3, PSMB6, PSMC2, PSMD13, PSMD2, PSMD4, PSME1, RBM4B, RBM8A, RBMX, RPL12, RPL13, RPL7, RPL9, RPS11, RPS12, RPS20, RPS24, RPS27A, SART3, SCAF1, SFPQ, SNRNP200, SNRPG, SNU13, SRSF3, SRSF6, TARDBP, UBB, UBE2V1, WBP4, YWHAB, ZNF326]	[AGO2, DBR1, HNRNPA1, HSPA8, LSM1, LSM4, PATL1, PSMA1, PSMA2, PSMA3, PSMA4, PSMA5, PSMA6, PSMA8, PSMB1, PSMB2, PSMB4, PSME2, RPL22, RPL4, RPS18, SAP18, SNRPD3, SRSF1, SRSF2, SRSF4, UBC, YWHAZ]	64.557	35.443	[AGO1, AGO2, AGO3, ALYREF, CIRBP, DBR1, DHX15, EEF1D, EIF4A1, EIF4A2, HNRNPA1, HNRNPK, HNRNPL, HNRNPR, HNRNPUL1, HSPA1A, HSPA8, KHSRP, LARP1, LSM1, LSM4, NCBP1, NONO, PATL1, PRDX6, PSMA1, PSMA2, PSMA3, PSMA4, PSMA5, PSMA6, PSMA8, PSMB1, PSMB2, PSMB3, PSMB4, PSMB6, PSMC2, PSMD13, PSMD2, PSMD4, PSME1, PSME2, RBM4B, RBM8A, RBMX, RPL12, RPL13, RPL22, RPL4, RPL7, RPL9, RPS11, RPS12, RPS18, RPS20, RPS2…
GO:0006405	RNA export from nucleus	GO_BiologicalProcess-EBI-QuickGO-GOA_20.11.2017_00h00	6.67445e-05	0.0209578	3.93901e-24	9.05973e-23	[5, 6, 7, 8]	Group23	8.96552	13	None Specific Cluster	[ALYREF, EIF5A, NCBP1, RANBP1, RBM8A, SRSF3, SRSF6]	[HNRNPA1, NUP210, RAN, SRSF1, SRSF2, SRSF4]	53.8462	46.1538	[ALYREF, EIF5A, HNRNPA1, NCBP1, NUP210, RAN, RANBP1, RBM8A, SRSF1, SRSF2, SRSF3, SRSF4, SRSF6]
GO:0051168	nuclear export	GO_BiologicalProcess-EBI-QuickGO-GOA_20.11.2017_00h00	6.14912e-05	0.0196157	3.93901e-24	9.05973e-23	[6, 7]	Group23	7.72947	16	None Specific Cluster	[ALYREF, EIF5A, NCBP1, RANBP1, RBM8A, SRSF3, SRSF6]	[ANP32B, HNRNPA1, NUP210, RAN, SRSF1, SRSF2, SRSF4, TXN, YWHAE]	43.75	56.25	[ALYREF, ANP32B, EIF5A, HNRNPA1, NCBP1, NUP210, RAN, RANBP1, RBM8A, SRSF1, SRSF2, SRSF3, SRSF4, SRSF6, TXN, YWHAE]
GO:1903311	regulation of mRNA metabolic process	GO_BiologicalProcess-EBI-QuickGO-GOA_20.11.2017_00h00	9.75327e-22	5.97876e-19	3.93901e-24	9.05973e-23	[5, 6, 7, 8]	Group23	15.1408	43	None Specific Cluster	[CIRBP, HNRNPK, HNRNPL, HNRNPR, HSPA1A, KHSRP, LARP1, NCBP1, PRDX6, PSMB3, PSMB6, PSMC2, PSMD13, PSMD2, PSMD4, PSME1, RBM8A, RBMX, RPS27A, SRSF3, SRSF6, TARDBP, UBB, YWHAB]	[AGO2, HNRNPA1, HSPA8, PSMA1, PSMA2, PSMA3, PSMA4, PSMA5, PSMA6, PSMA8, PSMB1, PSMB2, PSMB4, PSME2, SAP18, SRSF2, SRSF4, UBC, YWHAZ]	55.814	44.186	[AGO2, CIRBP, HNRNPA1, HNRNPK, HNRNPL, HNRNPR, HSPA1A, HSPA8, KHSRP, LARP1, NCBP1, PRDX6, PSMA1, PSMA2, PSMA3, PSMA4, PSMA5, PSMA6, PSMA8, PSMB1, PSMB2, PSMB3, PSMB4, PSMB6, PSMC2, PSMD13, PSMD2, PSMD4, PSME1, PSME2, RBM8A, RBMX, RPS27A, SAP18, SRSF2, SRSF3, SRSF4, SRSF6, TARDBP, UBB, UBC, YWHAB, YWHAZ]
GO:0006397	mRNA processing	GO_BiologicalProcess-EBI-QuickGO-GOA_20.11.2017_00h00	1.68064e-08	7.0587e-06	3.93901e-24	9.05973e-23	[6, 7, 8]	Group23	7.08661	36	Specific for Cluster #1	[ALYREF, DHX15, HNRNPK, HNRNPL, HNRNPR, HNRNPUL1, HSPA1A, KHSRP, NCBP1, NONO, PRDX6, RBM4B, RBM8A, RBMX, SART3, SCAF1, SFPQ, SNRNP200, SNRPG, SNU13, SRSF3, SRSF6, TARDBP, UBE2V1, WBP4, ZNF326]	[DBR1, HNRNPA1, HSPA8, LSM1, LSM4, SAP18, SNRPD3, SRSF1, SRSF2, SRSF4]	72.2222	27.7778	[ALYREF, DBR1, DHX15, HNRNPA1, HNRNPK, HNRNPL, HNRNPR, HNRNPUL1, HSPA1A, HSPA8, KHSRP, LSM1, LSM4, NCBP1, NONO, PRDX6, RBM4B, RBM8A, RBMX, SAP18, SART3, SCAF1, SFPQ, SNRNP200, SNRPD3, SNRPG, SNU13, SRSF1, SRSF2, SRSF3, SRSF4, SRSF6, TARDBP, UBE2V1, WBP4, ZNF326]
GO:0008380	RNA splicing	GO_BiologicalProcess-EBI-QuickGO-GOA_20.11.2017_00h00	4.99416e-10	2.24737e-07	3.93901e-24	9.05973e-23	[6, 7, 8]	Group23	8.08989	36	Specific for Cluster #1	[ALYREF, DHX15, HNRNPK, HNRNPL, HNRNPR, HNRNPUL1, HSPA1A, KHSRP, NCBP1, NONO, PRDX6, RBM4B, RBM8A, RBMX, SART3, SCAF1, SFPQ, SNRNP200, SNRPG, SNU13, SRSF3, SRSF6, TARDBP, UBE2V1, WBP4, ZNF326]	[DBR1, HNRNPA1, HSPA8, LSM1, LSM4, SAP18, SNRPD3, SRSF1, SRSF2, SRSF4]	72.2222	27.7778	[ALYREF, DBR1, DHX15, HNRNPA1, HNRNPK, HNRNPL, HNRNPR, HNRNPUL1, HSPA1A, HSPA8, KHSRP, LSM1, LSM4, NCBP1, NONO, PRDX6, RBM4B, RBM8A, RBMX, SAP18, SART3, SCAF1, SFPQ, SNRNP200, SNRPD3, SNRPG, SNU13, SRSF1, SRSF2, SRSF3, SRSF4, SRSF6, TARDBP, UBE2V1, WBP4, ZNF326]
GO:0043484	regulation of RNA splicing	GO_BiologicalProcess-EBI-QuickGO-GOA_20.11.2017_00h00	9.14851e-08	3.696e-05	3.93901e-24	9.05973e-23	[5, 6, 7, 8, 9]	Group23	12.6984	16	Specific for Cluster #1	[HNRNPK, HNRNPL, HSPA1A, NCBP1, PRDX6, RBM8A, RBMX, SRSF3, SRSF6, ZNF326]	[HNRNPA1, HSPA8, SAP18, SRSF1, SRSF2, SRSF4]	62.5	37.5	[HNRNPA1, HNRNPK, HNRNPL, HSPA1A, HSPA8, NCBP1, PRDX6, RBM8A, RBMX, SAP18, SRSF1, SRSF2, SRSF3, SRSF4, SRSF6, ZNF326]
GO:0050684	regulation of mRNA processing	GO_BiologicalProcess-EBI-QuickGO-GOA_20.11.2017_00h00	1.09256e-06	0.000419544	3.93901e-24	9.05973e-23	[5, 6, 7, 8, 9]	Group23	12.069	14	Specific for Cluster #1	[HNRNPK, HNRNPL, HSPA1A, NCBP1, PRDX6, RBM8A, RBMX, SRSF3, SRSF6]	[HNRNPA1, HSPA8, SAP18, SRSF2, SRSF4]	64.2857	35.7143	[HNRNPA1, HNRNPK, HNRNPL, HSPA1A, HSPA8, NCBP1, PRDX6, RBM8A, RBMX, SAP18, SRSF2, SRSF3, SRSF4, SRSF6]
GO:0033120	positive regulation of RNA splicing	GO_BiologicalProcess-EBI-QuickGO-GOA_20.11.2017_00h00	0.000140858	0.0404262	3.93901e-24	9.05973e-23	[5, 6, 7, 8, 9, 10]	Group23	18.1818	6	Specific for Cluster #1	[HSPA1A, NCBP1, PRDX6, RBMX]	[HSPA8, SRSF1]	66.6667	33.3333	[HSPA1A, HSPA8, NCBP1, PRDX6, RBMX, SRSF1]
GO:0000375	RNA splicing, via transesterification reactions	GO_BiologicalProcess-EBI-QuickGO-GOA_20.11.2017_00h00	1.37328e-09	6.02869e-07	3.93901e-24	9.05973e-23	[7, 8, 9]	Group23	8.95522	30	Specific for Cluster #1	[ALYREF, DHX15, HNRNPK, HNRNPL, HNRNPR, HNRNPUL1, KHSRP, NCBP1, NONO, PRDX6, RBM8A, RBMX, SART3, SFPQ, SNRNP200, SNRPG, SNU13, SRSF3, SRSF6, WBP4]	[DBR1, HNRNPA1, HSPA8, LSM1, LSM4, SAP18, SNRPD3, SRSF1, SRSF2, SRSF4]	66.6667	33.3333	[ALYREF, DBR1, DHX15, HNRNPA1, HNRNPK, HNRNPL, HNRNPR, HNRNPUL1, HSPA8, KHSRP, LSM1, LSM4, NCBP1, NONO, PRDX6, RBM8A, RBMX, SAP18, SART3, SFPQ, SNRNP200, SNRPD3, SNRPG, SNU13, SRSF1, SRSF2, SRSF3, SRSF4, SRSF6, WBP4]
GO:0000245	spliceosomal complex assembly	GO_BiologicalProcess-EBI-QuickGO-GOA_20.11.2017_00h00	8.66742e-05	0.0261756	3.93901e-24	9.05973e-23	[5, 6, 7, 8, 9, 10, 11, 12]	Group23	13.7931	8	Specific for Cluster #1	[NCBP1, RBMX, SNRNP200, SNRPG, SRSF6]	[LSM4, SNRPD3, SRSF1]	62.5	37.5	[LSM4, NCBP1, RBMX, SNRNP200, SNRPD3, SNRPG, SRSF1, SRSF6]
GO:0000398	mRNA splicing, via spliceosome	GO_BiologicalProcess-EBI-QuickGO-GOA_20.11.2017_00h00	1.8305e-08	7.66979e-06	3.93901e-24	9.05973e-23	[7, 8, 9, 10, 11]	Group23	8.43373	28	Specific for Cluster #1	[ALYREF, DHX15, HNRNPK, HNRNPL, HNRNPR, HNRNPUL1, NCBP1, NONO, PRDX6, RBM8A, RBMX, SART3, SFPQ, SNRNP200, SNRPG, SNU13, SRSF3, SRSF6, WBP4]	[DBR1, HNRNPA1, HSPA8, LSM4, SAP18, SNRPD3, SRSF1, SRSF2, SRSF4]	67.8571	32.1429	[ALYREF, DBR1, DHX15, HNRNPA1, HNRNPK, HNRNPL, HNRNPR, HNRNPUL1, HSPA8, LSM4, NCBP1, NONO, PRDX6, RBM8A, RBMX, SAP18, SART3, SFPQ, SNRNP200, SNRPD3, SNRPG, SNU13, SRSF1, SRSF2, SRSF3, SRSF4, SRSF6, WBP4]
GO:0006369	termination of RNA polymerase II transcription	GO_BiologicalProcess-EBI-QuickGO-GOA_20.11.2017_00h00	1.07636e-05	0.00376727	3.93901e-24	9.05973e-23	[7, 8, 9, 10, 11]	Group23	13.8889	10	Specific for Cluster #1	[ALYREF, NCBP1, RBM8A, SNRPG, SRSF3, SRSF6]	[SNRPD3, SRSF1, SRSF2, SRSF4]	60	40	[ALYREF, NCBP1, RBM8A, SNRPD3, SNRPG, SRSF1, SRSF2, SRSF3, SRSF4, SRSF6]
GO:0048025	negative regulation of mRNA splicing, via spliceosome	GO_BiologicalProcess-EBI-QuickGO-GOA_20.11.2017_00h00	0.000134196	0.0387827	3.93901e-24	9.05973e-23	[6, 7, 8, 9, 10, 11, 12, 13]	Group23	23.8095	5	Specific for Cluster #1	[HNRNPK, RBMX, SRSF6]	[SAP18, SRSF4]	60	40	[HNRNPK, RBMX, SAP18, SRSF4, SRSF6]
R-HSA:156827	L13a-mediated translational silencing of Ceruloplasmin expression	REACTOME_Pathways_20.11.2017	3.44757e-10	1.56175e-07	2.68803e-28	6.72006e-27	[-1]	Group24	15.9292	18	Specific for Cluster #1	[EIF2S1, EIF2S2, EIF3M, EIF4A1, EIF4A2, EIF4H, RPL12, RPL13, RPL7, RPL9, RPS11, RPS12, RPS20, RPS24, RPS27A]	[RPL22, RPL4, RPS18]	83.3333	16.6667	[EIF2S1, EIF2S2, EIF3M, EIF4A1, EIF4A2, EIF4H, RPL12, RPL13, RPL22, RPL4, RPL7, RPL9, RPS11, RPS12, RPS18, RPS20, RPS24, RPS27A]
R-HSA:156842	Eukaryotic Translation Elongation	REACTOME_Pathways_20.11.2017	1.00767e-08	4.25238e-06	2.68803e-28	6.72006e-27	[-1]	Group24	15.9574	15	Specific for Cluster #1	[EEF1B2, EEF1D, EEF2, RPL12, RPL13, RPL7, RPL9, RPS11, RPS12, RPS20, RPS24, RPS27A]	[RPL22, RPL4, RPS18]	80	20	[EEF1B2, EEF1D, EEF2, RPL12, RPL13, RPL22, RPL4, RPL7, RPL9, RPS11, RPS12, RPS18, RPS20, RPS24, RPS27A]
R-HSA:156902	Peptide chain elongation	REACTOME_Pathways_20.11.2017	3.25613e-07	0.000126989	2.68803e-28	6.72006e-27	[-1]	Group24	14.4444	13	Specific for Cluster #1	[EEF2, RPL12, RPL13, RPL7, RPL9, RPS11, RPS12, RPS20, RPS24, RPS27A]	[RPL22, RPL4, RPS18]	76.9231	23.0769	[EEF2, RPL12, RPL13, RPL22, RPL4, RPL7, RPL9, RPS11, RPS12, RPS18, RPS20, RPS24, RPS27A]
R-HSA:168254	Influenza Infection	REACTOME_Pathways_20.11.2017	1.68279e-07	6.69749e-05	2.68803e-28	6.72006e-27	[-1]	Group24	10.8434	18	Specific for Cluster #1	[CLTA, HSPA1A, KPNA4, RPL12, RPL13, RPL7, RPL9, RPS11, RPS12, RPS20, RPS24, RPS27A]	[CLTC, NUP210, RAN, RPL22, RPL4, RPS18]	66.6667	33.3333	[CLTA, CLTC, HSPA1A, KPNA4, NUP210, RAN, RPL12, RPL13, RPL22, RPL4, RPL7, RPL9, RPS11, RPS12, RPS18, RPS20, RPS24, RPS27A]
R-HSA:168255	Influenza Life Cycle	REACTOME_Pathways_20.11.2017	3.1454e-07	0.000122985	2.68803e-28	6.72006e-27	[-1]	Group24	10.9677	17	Specific for Cluster #1	[CLTA, HSPA1A, RPL12, RPL13, RPL7, RPL9, RPS11, RPS12, RPS20, RPS24, RPS27A]	[CLTC, NUP210, RAN, RPL22, RPL4, RPS18]	64.7059	35.2941	[CLTA, CLTC, HSPA1A, NUP210, RAN, RPL12, RPL13, RPL22, RPL4, RPL7, RPL9, RPS11, RPS12, RPS18, RPS20, RPS24, RPS27A]
R-HSA:168273	Influenza Viral RNA Transcription and Replication	REACTOME_Pathways_20.11.2017	6.67445e-05	0.0209578	2.68803e-28	6.72006e-27	[-1]	Group24	8.96552	13	Specific for Cluster #1	[RPL12, RPL13, RPL7, RPL9, RPS11, RPS12, RPS20, RPS24, RPS27A]	[NUP210, RPL22, RPL4, RPS18]	69.2308	30.7692	[NUP210, RPL12, RPL13, RPL22, RPL4, RPL7, RPL9, RPS11, RPS12, RPS18, RPS20, RPS24, RPS27A]
R-HSA:1799339	SRP-dependent cotranslational protein targeting to membrane	REACTOME_Pathways_20.11.2017	2.39223e-05	0.00803789	2.68803e-28	6.72006e-27	[-1]	Group24	10.6195	12	Specific for Cluster #1	[RPL12, RPL13, RPL7, RPL9, RPS11, RPS12, RPS20, RPS24, RPS27A]	[RPL22, RPL4, RPS18]	75	25	[RPL12, RPL13, RPL22, RPL4, RPL7, RPL9, RPS11, RPS12, RPS18, RPS20, RPS24, RPS27A]
R-HSA:192823	Viral mRNA Translation	REACTOME_Pathways_20.11.2017	7.54187e-06	0.00268491	2.68803e-28	6.72006e-27	[-1]	Group24	11.8812	12	Specific for Cluster #1	[RPL12, RPL13, RPL7, RPL9, RPS11, RPS12, RPS20, RPS24, RPS27A]	[RPL22, RPL4, RPS18]	75	25	[RPL12, RPL13, RPL22, RPL4, RPL7, RPL9, RPS11, RPS12, RPS18, RPS20, RPS24, RPS27A]
R-HSA:2408522	Selenoamino acid metabolism	REACTOME_Pathways_20.11.2017	2.54852e-07	0.000100157	2.68803e-28	6.72006e-27	[-1]	Group24	12.605	15	Specific for Cluster #1	[LARS, QARS, RARS, RPL12, RPL13, RPL7, RPL9, RPS11, RPS12, RPS20, RPS24, RPS27A]	[RPL22, RPL4, RPS18]	80	20	[LARS, QARS, RARS, RPL12, RPL13, RPL22, RPL4, RPL7, RPL9, RPS11, RPS12, RPS18, RPS20, RPS24, RPS27A]
R-HSA:2408557	Selenocysteine synthesis	REACTOME_Pathways_20.11.2017	3.53262e-06	0.0013106	2.68803e-28	6.72006e-27	[-1]	Group24	12.766	12	Specific for Cluster #1	[RPL12, RPL13, RPL7, RPL9, RPS11, RPS12, RPS20, RPS24, RPS27A]	[RPL22, RPL4, RPS18]	75	25	[RPL12, RPL13, RPL22, RPL4, RPL7, RPL9, RPS11, RPS12, RPS18, RPS20, RPS24, RPS27A]
R-HSA:376176	Signaling by ROBO receptors	REACTOME_Pathways_20.11.2017	9.39766e-18	5.39425e-15	2.68803e-28	6.72006e-27	[-1]	Group24	15.5251	34	None Specific Cluster	[NCBP1, PSMB3, PSMB6, PSMC2, PSMD13, PSMD2, PSMD4, PSME1, RBM8A, RPL12, RPL13, RPL7, RPL9, RPS11, RPS12, RPS20, RPS24, RPS27A, UBB]	[PSMA1, PSMA2, PSMA3, PSMA4, PSMA5, PSMA6, PSMA8, PSMB1, PSMB2, PSMB4, PSME2, RPL22, RPL4, RPS18, UBC]	55.8824	44.1176	[NCBP1, PSMA1, PSMA2, PSMA3, PSMA4, PSMA5, PSMA6, PSMA8, PSMB1, PSMB2, PSMB3, PSMB4, PSMB6, PSMC2, PSMD13, PSMD2, PSMD4, PSME1, PSME2, RBM8A, RPL12, RPL13, RPL22, RPL4, RPL7, RPL9, RPS11, RPS12, RPS18, RPS20, RPS24, RPS27A, UBB, UBC]
R-HSA:5663205	Infectious disease	REACTOME_Pathways_20.11.2017	6.46736e-16	3.52471e-13	2.68803e-28	6.72006e-27	[-1]	Group24	10.2273	45	None Specific Cluster	[AP2S1, CLTA, EEF2, HSPA1A, KPNA4, NCBP1, PSMB3, PSMB6, PSMC2, PSMD13, PSMD2, PSMD4, PSME1, RANBP1, RPL12, RPL13, RPL7, RPL9, RPS11, RPS12, RPS20, RPS24, RPS27A, SSRP1, UBB]	[BANF1, CALM1, CLTC, NUP210, PSMA1, PSMA2, PSMA3, PSMA4, PSMA5, PSMA6, PSMA8, PSMB1, PSMB2, PSMB4, PSME2, RAN, RPL22, RPL4, RPS18, UBC]	55.5556	44.4444	[AP2S1, BANF1, CALM1, CLTA, CLTC, EEF2, HSPA1A, KPNA4, NCBP1, NUP210, PSMA1, PSMA2, PSMA3, PSMA4, PSMA5, PSMA6, PSMA8, PSMB1, PSMB2, PSMB3, PSMB4, PSMB6, PSMC2, PSMD13, PSMD2, PSMD4, PSME1, PSME2, RAN, RANBP1, RPL12, RPL13, RPL22, RPL4, RPL7, RPL9, RPS11, RPS12, RPS18, RPS20, RPS24, RPS27A, SSRP1, UBB, UBC]
R-HSA:6791226	Major pathway of rRNA processing in the nucleolus and cytosol	REACTOME_Pathways_20.11.2017	7.25047e-05	0.022549	2.68803e-28	6.72006e-27	[-1]	Group24	7.97872	15	Specific for Cluster #1	[NCL, RPL12, RPL13, RPL7, RPL9, RPS11, RPS12, RPS20, RPS24, RPS27A, SNU13]	[BOP1, RPL22, RPL4, RPS18]	73.3333	26.6667	[BOP1, NCL, RPL12, RPL13, RPL22, RPL4, RPL7, RPL9, RPS11, RPS12, RPS18, RPS20, RPS24, RPS27A, SNU13]
R-HSA:71291	Metabolism of amino acids and derivatives	REACTOME_Pathways_20.11.2017	7.54344e-14	3.87733e-11	2.68803e-28	6.72006e-27	[-1]	Group24	10.411	38	None Specific Cluster	[KYAT3, LARS, PSMB3, PSMB6, PSMC2, PSMD13, PSMD2, PSMD4, PSME1, QARS, RARS, RPL12, RPL13, RPL7, RPL9, RPS11, RPS12, RPS20, RPS24, RPS27A]	[ALDH9A1, HPD, MCCC1, MTAP, PSMA1, PSMA2, PSMA3, PSMA4, PSMA5, PSMA6, PSMA8, PSMB1, PSMB2, PSMB4, PSME2, RPL22, RPL4, RPS18]	52.6316	47.3684	[ALDH9A1, HPD, KYAT3, LARS, MCCC1, MTAP, PSMA1, PSMA2, PSMA3, PSMA4, PSMA5, PSMA6, PSMA8, PSMB1, PSMB2, PSMB3, PSMB4, PSMB6, PSMC2, PSMD13, PSMD2, PSMD4, PSME1, PSME2, QARS, RARS, RPL12, RPL13, RPL22, RPL4, RPL7, RPL9, RPS11, RPS12, RPS18, RPS20, RPS24, RPS27A]
R-HSA:72312	rRNA processing	REACTOME_Pathways_20.11.2017	6.51303e-05	0.0206463	2.68803e-28	6.72006e-27	[-1]	Group24	7.69231	16	Specific for Cluster #1	[NCL, NOP2, RPL12, RPL13, RPL7, RPL9, RPS11, RPS12, RPS20, RPS24, RPS27A, SNU13]	[BOP1, RPL22, RPL4, RPS18]	75	25	[BOP1, NCL, NOP2, RPL12, RPL13, RPL22, RPL4, RPL7, RPL9, RPS11, RPS12, RPS18, RPS20, RPS24, RPS27A, SNU13]
R-HSA:72613	Eukaryotic Translation Initiation	REACTOME_Pathways_20.11.2017	1.08734e-09	4.8169e-07	2.68803e-28	6.72006e-27	[-1]	Group24	14.876	18	Specific for Cluster #1	[EIF2S1, EIF2S2, EIF3M, EIF4A1, EIF4A2, EIF4H, RPL12, RPL13, RPL7, RPL9, RPS11, RPS12, RPS20, RPS24, RPS27A]	[RPL22, RPL4, RPS18]	83.3333	16.6667	[EIF2S1, EIF2S2, EIF3M, EIF4A1, EIF4A2, EIF4H, RPL12, RPL13, RPL22, RPL4, RPL7, RPL9, RPS11, RPS12, RPS18, RPS20, RPS24, RPS27A]
R-HSA:72649	Translation initiation complex formation	REACTOME_Pathways_20.11.2017	2.21631e-08	9.21983e-06	2.68803e-28	6.72006e-27	[-1]	Group24	20	12	Specific for Cluster #1	[EIF2S1, EIF2S2, EIF3M, EIF4A1, EIF4A2, EIF4H, RPS11, RPS12, RPS20, RPS24, RPS27A]	[RPS18]	91.6667	8.33333	[EIF2S1, EIF2S2, EIF3M, EIF4A1, EIF4A2, EIF4H, RPS11, RPS12, RPS18, RPS20, RPS24, RPS27A]
R-HSA:72662	Activation of the mRNA upon binding of the cap-binding complex and eIFs, and subsequent binding to 43S	REACTOME_Pathways_20.11.2017	2.69787e-08	1.11422e-05	2.68803e-28	6.72006e-27	[-1]	Group24	19.6721	12	Specific for Cluster #1	[EIF2S1, EIF2S2, EIF3M, EIF4A1, EIF4A2, EIF4H, RPS11, RPS12, RPS20, RPS24, RPS27A]	[RPS18]	91.6667	8.33333	[EIF2S1, EIF2S2, EIF3M, EIF4A1, EIF4A2, EIF4H, RPS11, RPS12, RPS18, RPS20, RPS24, RPS27A]
R-HSA:72689	Formation of a pool of free 40S subunits	REACTOME_Pathways_20.11.2017	1.58369e-06	0.00060497	2.68803e-28	6.72006e-27	[-1]	Group24	12.6214	13	Specific for Cluster #1	[EIF3M, RPL12, RPL13, RPL7, RPL9, RPS11, RPS12, RPS20, RPS24, RPS27A]	[RPL22, RPL4, RPS18]	76.9231	23.0769	[EIF3M, RPL12, RPL13, RPL22, RPL4, RPL7, RPL9, RPS11, RPS12, RPS18, RPS20, RPS24, RPS27A]
R-HSA:72695	Formation of the ternary complex, and subsequently, the 43S complex	REACTOME_Pathways_20.11.2017	5.4962e-06	0.00198962	2.68803e-28	6.72006e-27	[-1]	Group24	16.9811	9	Specific for Cluster #1	[EIF2S1, EIF2S2, EIF3M, RPS11, RPS12, RPS20, RPS24, RPS27A]	[RPS18]	88.8889	11.1111	[EIF2S1, EIF2S2, EIF3M, RPS11, RPS12, RPS18, RPS20, RPS24, RPS27A]
R-HSA:72702	Ribosomal scanning and start codon recognition	REACTOME_Pathways_20.11.2017	2.21631e-08	9.21983e-06	2.68803e-28	6.72006e-27	[-1]	Group24	20	12	Specific for Cluster #1	[EIF2S1, EIF2S2, EIF3M, EIF4A1, EIF4A2, EIF4H, RPS11, RPS12, RPS20, RPS24, RPS27A]	[RPS18]	91.6667	8.33333	[EIF2S1, EIF2S2, EIF3M, EIF4A1, EIF4A2, EIF4H, RPS11, RPS12, RPS18, RPS20, RPS24, RPS27A]
R-HSA:72706	GTP hydrolysis and joining of the 60S ribosomal subunit	REACTOME_Pathways_20.11.2017	4.00179e-10	1.80881e-07	2.68803e-28	6.72006e-27	[-1]	Group24	15.7895	18	Specific for Cluster #1	[EIF2S1, EIF2S2, EIF3M, EIF4A1, EIF4A2, EIF4H, RPL12, RPL13, RPL7, RPL9, RPS11, RPS12, RPS20, RPS24, RPS27A]	[RPL22, RPL4, RPS18]	83.3333	16.6667	[EIF2S1, EIF2S2, EIF3M, EIF4A1, EIF4A2, EIF4H, RPL12, RPL13, RPL22, RPL4, RPL7, RPL9, RPS11, RPS12, RPS18, RPS20, RPS24, RPS27A]
R-HSA:72737	Cap-dependent Translation Initiation	REACTOME_Pathways_20.11.2017	1.08734e-09	4.8169e-07	2.68803e-28	6.72006e-27	[-1]	Group24	14.876	18	Specific for Cluster #1	[EIF2S1, EIF2S2, EIF3M, EIF4A1, EIF4A2, EIF4H, RPL12, RPL13, RPL7, RPL9, RPS11, RPS12, RPS20, RPS24, RPS27A]	[RPL22, RPL4, RPS18]	83.3333	16.6667	[EIF2S1, EIF2S2, EIF3M, EIF4A1, EIF4A2, EIF4H, RPL12, RPL13, RPL22, RPL4, RPL7, RPL9, RPS11, RPS12, RPS18, RPS20, RPS24, RPS27A]
R-HSA:72764	Eukaryotic Translation Termination	REACTOME_Pathways_20.11.2017	3.53262e-06	0.0013106	2.68803e-28	6.72006e-27	[-1]	Group24	12.766	12	Specific for Cluster #1	[RPL12, RPL13, RPL7, RPL9, RPS11, RPS12, RPS20, RPS24, RPS27A]	[RPL22, RPL4, RPS18]	75	25	[RPL12, RPL13, RPL22, RPL4, RPL7, RPL9, RPS11, RPS12, RPS18, RPS20, RPS24, RPS27A]
R-HSA:72766	Translation	REACTOME_Pathways_20.11.2017	1.06237e-09	4.71694e-07	2.68803e-28	6.72006e-27	[-1]	Group24	9.58904	28	Specific for Cluster #1	[AARS, EEF1B2, EEF1D, EEF2, EIF2S1, EIF2S2, EIF3M, EIF4A1, EIF4A2, EIF4H, FARSB, GARS, LARS, QARS, RARS, RPL12, RPL13, RPL7, RPL9, RPS11, RPS12, RPS20, RPS24, RPS27A, WARS2]	[RPL22, RPL4, RPS18]	89.2857	10.7143	[AARS, EEF1B2, EEF1D, EEF2, EIF2S1, EIF2S2, EIF3M, EIF4A1, EIF4A2, EIF4H, FARSB, GARS, LARS, QARS, RARS, RPL12, RPL13, RPL22, RPL4, RPL7, RPL9, RPS11, RPS12, RPS18, RPS20, RPS24, RPS27A, WARS2]
R-HSA:8868773	rRNA processing in the nucleus and cytosol	REACTOME_Pathways_20.11.2017	3.59778e-05	0.0117647	2.68803e-28	6.72006e-27	[-1]	Group24	8.08081	16	Specific for Cluster #1	[NCL, NOP2, RPL12, RPL13, RPL7, RPL9, RPS11, RPS12, RPS20, RPS24, RPS27A, SNU13]	[BOP1, RPL22, RPL4, RPS18]	75	25	[BOP1, NCL, NOP2, RPL12, RPL13, RPL22, RPL4, RPL7, RPL9, RPS11, RPS12, RPS18, RPS20, RPS24, RPS27A, SNU13]
R-HSA:8953854	Metabolism of RNA	REACTOME_Pathways_20.11.2017	2.86212e-23	1.76879e-20	2.68803e-28	6.72006e-27	[-1]	Group24	10.0443	68	None Specific Cluster	[ALYREF, DHX15, EIF4A1, EIF4A2, HNRNPK, HNRNPL, HNRNPR, HNRNPUL1, HSPA1A, KHSRP, NCBP1, NCL, NOP2, PSMB3, PSMB6, PSMC2, PSMD13, PSMD2, PSMD4, PSME1, RBM8A, RBMX, RPL12, RPL13, RPL7, RPL9, RPS11, RPS12, RPS20, RPS24, RPS27A, SNRNP200, SNRPG, SNU13, SNURF, SRSF3, SRSF6, UBB, WBP4, YWHAB]	[BOP1, HNRNPA1, HSPA8, LSM1, LSM4, NUP210, PATL1, PSMA1, PSMA2, PSMA3, PSMA4, PSMA5, PSMA6, PSMA8, PSMB1, PSMB2, PSMB4, PSME2, RAN, RPL22, RPL4, RPS18, SNRPD3, SRSF1, SRSF2, SRSF4, UBC, YWHAZ]	58.8235	41.1765	[ALYREF, BOP1, DHX15, EIF4A1, EIF4A2, HNRNPA1, HNRNPK, HNRNPL, HNRNPR, HNRNPUL1, HSPA1A, HSPA8, KHSRP, LSM1, LSM4, NCBP1, NCL, NOP2, NUP210, PATL1, PSMA1, PSMA2, PSMA3, PSMA4, PSMA5, PSMA6, PSMA8, PSMB1, PSMB2, PSMB3, PSMB4, PSMB6, PSMC2, PSMD13, PSMD2, PSMD4, PSME1, PSME2, RAN, RBM8A, RBMX, RPL12, RPL13, RPL22, RPL4, RPL7, RPL9, RPS11, RPS12, RPS18, RPS20, RPS24, RPS27A, SNRNP200, SNRPD3, SNRPG,…
R-HSA:9010553	Regulation of expression of SLITs and ROBOs	REACTOME_Pathways_20.11.2017	3.34069e-21	2.03114e-18	2.68803e-28	6.72006e-27	[-1]	Group24	19.7674	34	None Specific Cluster	[NCBP1, PSMB3, PSMB6, PSMC2, PSMD13, PSMD2, PSMD4, PSME1, RBM8A, RPL12, RPL13, RPL7, RPL9, RPS11, RPS12, RPS20, RPS24, RPS27A, UBB]	[PSMA1, PSMA2, PSMA3, PSMA4, PSMA5, PSMA6, PSMA8, PSMB1, PSMB2, PSMB4, PSME2, RPL22, RPL4, RPS18, UBC]	55.8824	44.1176	[NCBP1, PSMA1, PSMA2, PSMA3, PSMA4, PSMA5, PSMA6, PSMA8, PSMB1, PSMB2, PSMB3, PSMB4, PSMB6, PSMC2, PSMD13, PSMD2, PSMD4, PSME1, PSME2, RBM8A, RPL12, RPL13, RPL22, RPL4, RPL7, RPL9, RPS11, RPS12, RPS18, RPS20, RPS24, RPS27A, UBB, UBC]
R-HSA:927802	Nonsense-Mediated Decay (NMD)	REACTOME_Pathways_20.11.2017	1.09256e-06	0.000419544	2.68803e-28	6.72006e-27	[-1]	Group24	12.069	14	Specific for Cluster #1	[NCBP1, RBM8A, RPL12, RPL13, RPL7, RPL9, RPS11, RPS12, RPS20, RPS24, RPS27A]	[RPL22, RPL4, RPS18]	78.5714	21.4286	[NCBP1, RBM8A, RPL12, RPL13, RPL22, RPL4, RPL7, RPL9, RPS11, RPS12, RPS18, RPS20, RPS24, RPS27A]
R-HSA:975956	Nonsense Mediated Decay (NMD) independent of the Exon Junction Complex (EJC)	REACTOME_Pathways_20.11.2017	6.98855e-07	0.000270457	2.68803e-28	6.72006e-27	[-1]	Group24	13.5417	13	Specific for Cluster #1	[NCBP1, RPL12, RPL13, RPL7, RPL9, RPS11, RPS12, RPS20, RPS24, RPS27A]	[RPL22, RPL4, RPS18]	76.9231	23.0769	[NCBP1, RPL12, RPL13, RPL22, RPL4, RPL7, RPL9, RPS11, RPS12, RPS18, RPS20, RPS24, RPS27A]
R-HSA:975957	Nonsense Mediated Decay (NMD) enhanced by the Exon Junction Complex (EJC)	REACTOME_Pathways_20.11.2017	1.09256e-06	0.000419544	2.68803e-28	6.72006e-27	[-1]	Group24	12.069	14	Specific for Cluster #1	[NCBP1, RBM8A, RPL12, RPL13, RPL7, RPL9, RPS11, RPS12, RPS20, RPS24, RPS27A]	[RPL22, RPL4, RPS18]	78.5714	21.4286	[NCBP1, RBM8A, RPL12, RPL13, RPL22, RPL4, RPL7, RPL9, RPS11, RPS12, RPS18, RPS20, RPS24, RPS27A]
WP:107	Translation Factors	WikiPathways_20.11.2017	3.94234e-06	0.00144684	2.68803e-28	6.72006e-27	[-1]	Group24	17.6471	9	Specific for Cluster #1	[EEF1B2, EEF1D, EEF2, EIF2S1, EIF2S2, EIF4A1, EIF4A2, EIF4H, EIF5A]	[]	100	0	[EEF1B2, EEF1D, EEF2, EIF2S1, EIF2S2, EIF4A1, EIF4A2, EIF4H, EIF5A]
WP:477	Cytoplasmic Ribosomal Proteins	WikiPathways_20.11.2017	1.96364e-06	0.000740292	2.68803e-28	6.72006e-27	[-1]	Group24	13.4831	12	Specific for Cluster #1	[RPL12, RPL13, RPL7, RPL9, RPS11, RPS12, RPS20, RPS24, RPS27A]	[RPL22, RPL4, RPS18]	75	25	[RPL12, RPL13, RPL22, RPL4, RPL7, RPL9, RPS11, RPS12, RPS18, RPS20, RPS24, RPS27A]
GO:0022613	ribonucleoprotein complex biogenesis	GO_BiologicalProcess-EBI-QuickGO-GOA_20.11.2017_00h00	2.69295e-08	1.11488e-05	2.68803e-28	6.72006e-27	[3]	Group24	7.08502	35	Specific for Cluster #1	[AGO1, AGO3, CIRBP, DYNC1H1, EIF2S1, EIF4H, MMAB, NCBP1, NOP2, RBMX, RPL12, RPL13, RPL7, RPL9, RPS11, RPS12, RPS20, RPS24, RPS27A, RSL1D1, SART3, SNRNP200, SNRPG, SNU13, SRSF6]	[AGO2, BOP1, LSM4, PATL1, RAN, RPL22, RPL4, RPS18, SNRPD3, SRSF1]	71.4286	28.5714	[AGO1, AGO2, AGO3, BOP1, CIRBP, DYNC1H1, EIF2S1, EIF4H, LSM4, MMAB, NCBP1, NOP2, PATL1, RAN, RBMX, RPL12, RPL13, RPL22, RPL4, RPL7, RPL9, RPS11, RPS12, RPS18, RPS20, RPS24, RPS27A, RSL1D1, SART3, SNRNP200, SNRPD3, SNRPG, SNU13, SRSF1, SRSF6]
GO:0019439	aromatic compound catabolic process	GO_BiologicalProcess-EBI-QuickGO-GOA_20.11.2017_00h00	2.64073e-22	1.62405e-19	2.68803e-28	6.72006e-27	[4]	Group24	10.5263	62	None Specific Cluster	[AGO1, AGO3, BLVRA, CIRBP, EIF4A1, EIF4A2, EPHX2, HNRNPR, HSPA1A, KHSRP, LARP1, NCBP1, NT5C2, PSMB3, PSMB6, PSMC2, PSMD13, PSMD2, PSMD4, PSME1, RACK1, RBM8A, RPL12, RPL13, RPL7, RPL9, RPS11, RPS12, RPS20, RPS24, RPS27A, SAMHD1, TARDBP, UBB, YWHAB]	[AGO2, BLVRB, GPX1, HPD, HPRT1, HSPA8, LSM1, LSM4, PATL1, PSMA1, PSMA2, PSMA3, PSMA4, PSMA5, PSMA6, PSMA8, PSMB1, PSMB2, PSMB4, PSME2, RPL22, RPL4, RPS18, TYMP, UBC, VCP, YWHAZ]	56.4516	43.5484	[AGO1, AGO2, AGO3, BLVRA, BLVRB, CIRBP, EIF4A1, EIF4A2, EPHX2, GPX1, HNRNPR, HPD, HPRT1, HSPA1A, HSPA8, KHSRP, LARP1, LSM1, LSM4, NCBP1, NT5C2, PATL1, PSMA1, PSMA2, PSMA3, PSMA4, PSMA5, PSMA6, PSMA8, PSMB1, PSMB2, PSMB3, PSMB4, PSMB6, PSMC2, PSMD13, PSMD2, PSMD4, PSME1, PSME2, RACK1, RBM8A, RPL12, RPL13, RPL22, RPL4, RPL7, RPL9, RPS11, RPS12, RPS18, RPS20, RPS24, RPS27A, SAMHD1, TARDBP, TYMP, UBB…
GO:0043603	cellular amide metabolic process	GO_BiologicalProcess-EBI-QuickGO-GOA_20.11.2017_00h00	1.55306e-13	7.88953e-11	2.68803e-28	6.72006e-27	[4]	Group24	6.49106	69	Specific for Cluster #1	[AARS, AGO1, AGO3, CIRBP, EEF1B2, EEF1D, EEF2, EIF2S1, EIF2S2, EIF3M, EIF4A1, EIF4A2, EIF4H, EIF5A, FARSB, G6PD, GARS, GCLC, GLO1, GSTK1, GSTM3, GSTO1, HNRNPR, ILF3, KHSRP, LARP1, LARS, NCBP1, NCL, NIT2, NPEPPS, QARS, RACK1, RARS, RBM4B, RBM8A, RIDA, RPL12, RPL13, RPL7, RPL9, RPS11, RPS12, RPS20, RPS24, RPS27A, WARS2]	[AASDHPPT, ACO1, ADSL, AGO2, CDK5RAP1, CNDP2, GAPDH, GPX1, GSS, GSTA3, HSPA8, MCCC1, MTPN, NUP210, PGAM1, RAN, RPL22, RPL4, RPS18, SOD1, TGFBRAP1, XPNPEP1]	68.1159	31.8841	[AARS, AASDHPPT, ACO1, ADSL, AGO1, AGO2, AGO3, CDK5RAP1, CIRBP, CNDP2, EEF1B2, EEF1D, EEF2, EIF2S1, EIF2S2, EIF3M, EIF4A1, EIF4A2, EIF4H, EIF5A, FARSB, G6PD, GAPDH, GARS, GCLC, GLO1, GPX1, GSS, GSTA3, GSTK1, GSTM3, GSTO1, HNRNPR, HSPA8, ILF3, KHSRP, LARP1, LARS, MCCC1, MTPN, NCBP1, NCL, NIT2, NPEPPS, NUP210, PGAM1, QARS, RACK1, RAN, RARS, RBM4B, RBM8A, RIDA, RPL12, RPL13, RPL22, RPL4, RPL7, RPL9,…
GO:0044270	cellular nitrogen compound catabolic process	GO_BiologicalProcess-EBI-QuickGO-GOA_20.11.2017_00h00	8.13324e-23	5.01821e-20	2.68803e-28	6.72006e-27	[4]	Group24	10.7639	62	None Specific Cluster	[AGO1, AGO3, BLVRA, CIRBP, EIF4A1, EIF4A2, HNRNPR, HSPA1A, KHSRP, LARP1, NCBP1, NT5C2, PSMB3, PSMB6, PSMC2, PSMD13, PSMD2, PSMD4, PSME1, RACK1, RBM8A, RPL12, RPL13, RPL7, RPL9, RPS11, RPS12, RPS20, RPS24, RPS27A, SAMHD1, TARDBP, UBB, VDAC2, YWHAB]	[AGO2, BLVRB, CYP3A4, GPX1, HPRT1, HSPA8, LSM1, LSM4, PATL1, PSMA1, PSMA2, PSMA3, PSMA4, PSMA5, PSMA6, PSMA8, PSMB1, PSMB2, PSMB4, PSME2, RPL22, RPL4, RPS18, TYMP, UBC, VCP, YWHAZ]	56.4516	43.5484	[AGO1, AGO2, AGO3, BLVRA, BLVRB, CIRBP, CYP3A4, EIF4A1, EIF4A2, GPX1, HNRNPR, HPRT1, HSPA1A, HSPA8, KHSRP, LARP1, LSM1, LSM4, NCBP1, NT5C2, PATL1, PSMA1, PSMA2, PSMA3, PSMA4, PSMA5, PSMA6, PSMA8, PSMB1, PSMB2, PSMB3, PSMB4, PSMB6, PSMC2, PSMD13, PSMD2, PSMD4, PSME1, PSME2, RACK1, RBM8A, RPL12, RPL13, RPL22, RPL4, RPL7, RPL9, RPS11, RPS12, RPS18, RPS20, RPS24, RPS27A, SAMHD1, TARDBP, TYMP, UBB, UB…
GO:0046700	heterocycle catabolic process	GO_BiologicalProcess-EBI-QuickGO-GOA_20.11.2017_00h00	1.75068e-21	1.06966e-18	2.68803e-28	6.72006e-27	[4]	Group24	10.4712	60	None Specific Cluster	[AGO1, AGO3, BLVRA, CIRBP, EIF4A1, EIF4A2, HNRNPR, HSPA1A, KHSRP, LARP1, NCBP1, NT5C2, PSMB3, PSMB6, PSMC2, PSMD13, PSMD2, PSMD4, PSME1, RACK1, RBM8A, RPL12, RPL13, RPL7, RPL9, RPS11, RPS12, RPS20, RPS24, RPS27A, SAMHD1, TARDBP, UBB, YWHAB]	[AGO2, BLVRB, GPX1, HPRT1, HSPA8, LSM1, LSM4, PATL1, PSMA1, PSMA2, PSMA3, PSMA4, PSMA5, PSMA6, PSMA8, PSMB1, PSMB2, PSMB4, PSME2, RPL22, RPL4, RPS18, TYMP, UBC, VCP, YWHAZ]	56.6667	43.3333	[AGO1, AGO2, AGO3, BLVRA, BLVRB, CIRBP, EIF4A1, EIF4A2, GPX1, HNRNPR, HPRT1, HSPA1A, HSPA8, KHSRP, LARP1, LSM1, LSM4, NCBP1, NT5C2, PATL1, PSMA1, PSMA2, PSMA3, PSMA4, PSMA5, PSMA6, PSMA8, PSMB1, PSMB2, PSMB3, PSMB4, PSMB6, PSMC2, PSMD13, PSMD2, PSMD4, PSME1, PSME2, RACK1, RBM8A, RPL12, RPL13, RPL22, RPL4, RPL7, RPL9, RPS11, RPS12, RPS18, RPS20, RPS24, RPS27A, SAMHD1, TARDBP, TYMP, UBB, UBC, VCP, …
GO:1901361	organic cyclic compound catabolic process	GO_BiologicalProcess-EBI-QuickGO-GOA_20.11.2017_00h00	9.84317e-22	6.02402e-19	2.68803e-28	6.72006e-27	[4]	Group24	10.1124	63	None Specific Cluster	[AGO1, AGO3, BLVRA, CIRBP, EIF4A1, EIF4A2, EPHX2, HNRNPR, HSPA1A, KHSRP, LARP1, NCBP1, NT5C2, PSMB3, PSMB6, PSMC2, PSMD13, PSMD2, PSMD4, PSME1, RACK1, RBM8A, RPL12, RPL13, RPL7, RPL9, RPS11, RPS12, RPS20, RPS24, RPS27A, SAMHD1, TARDBP, UBB, YWHAB]	[AGO2, BLVRB, CYP3A4, GPX1, HPD, HPRT1, HSPA8, LSM1, LSM4, PATL1, PSMA1, PSMA2, PSMA3, PSMA4, PSMA5, PSMA6, PSMA8, PSMB1, PSMB2, PSMB4, PSME2, RPL22, RPL4, RPS18, TYMP, UBC, VCP, YWHAZ]	55.5556	44.4444	[AGO1, AGO2, AGO3, BLVRA, BLVRB, CIRBP, CYP3A4, EIF4A1, EIF4A2, EPHX2, GPX1, HNRNPR, HPD, HPRT1, HSPA1A, HSPA8, KHSRP, LARP1, LSM1, LSM4, NCBP1, NT5C2, PATL1, PSMA1, PSMA2, PSMA3, PSMA4, PSMA5, PSMA6, PSMA8, PSMB1, PSMB2, PSMB3, PSMB4, PSMB6, PSMC2, PSMD13, PSMD2, PSMD4, PSME1, PSME2, RACK1, RBM8A, RPL12, RPL13, RPL22, RPL4, RPL7, RPL9, RPS11, RPS12, RPS18, RPS20, RPS24, RPS27A, SAMHD1, TARDBP, T…
GO:0006518	peptide metabolic process	GO_BiologicalProcess-EBI-QuickGO-GOA_20.11.2017_00h00	1.2046e-14	6.3121e-12	2.68803e-28	6.72006e-27	[4, 5]	Group24	7.1991	64	Specific for Cluster #1	[AARS, AGO1, AGO3, CIRBP, EEF1B2, EEF1D, EEF2, EIF2S1, EIF2S2, EIF3M, EIF4A1, EIF4A2, EIF4H, EIF5A, FARSB, G6PD, GARS, GCLC, GLO1, GSTK1, GSTM3, GSTO1, HNRNPR, ILF3, KHSRP, LARP1, LARS, NCBP1, NCL, NPEPPS, QARS, RACK1, RARS, RBM4B, RBM8A, RIDA, RPL12, RPL13, RPL7, RPL9, RPS11, RPS12, RPS20, RPS24, RPS27A, WARS2]	[ACO1, AGO2, CDK5RAP1, CNDP2, GAPDH, GPX1, GSS, GSTA3, HSPA8, MTPN, NUP210, RAN, RPL22, RPL4, RPS18, SOD1, TGFBRAP1, XPNPEP1]	71.875	28.125	[AARS, ACO1, AGO1, AGO2, AGO3, CDK5RAP1, CIRBP, CNDP2, EEF1B2, EEF1D, EEF2, EIF2S1, EIF2S2, EIF3M, EIF4A1, EIF4A2, EIF4H, EIF5A, FARSB, G6PD, GAPDH, GARS, GCLC, GLO1, GPX1, GSS, GSTA3, GSTK1, GSTM3, GSTO1, HNRNPR, HSPA8, ILF3, KHSRP, LARP1, LARS, MTPN, NCBP1, NCL, NPEPPS, NUP210, QARS, RACK1, RAN, RARS, RBM4B, RBM8A, RIDA, RPL12, RPL13, RPL22, RPL4, RPL7, RPL9, RPS11, RPS12, RPS18, RPS20, RPS24, …
GO:0034655	nucleobase-containing compound catabolic process	GO_BiologicalProcess-EBI-QuickGO-GOA_20.11.2017_00h00	7.48236e-22	4.59417e-19	2.68803e-28	6.72006e-27	[4, 5]	Group24	11.0057	58	None Specific Cluster	[AGO1, AGO3, CIRBP, EIF4A1, EIF4A2, HNRNPR, HSPA1A, KHSRP, LARP1, NCBP1, NT5C2, PSMB3, PSMB6, PSMC2, PSMD13, PSMD2, PSMD4, PSME1, RACK1, RBM8A, RPL12, RPL13, RPL7, RPL9, RPS11, RPS12, RPS20, RPS24, RPS27A, SAMHD1, TARDBP, UBB, YWHAB]	[AGO2, GPX1, HPRT1, HSPA8, LSM1, LSM4, PATL1, PSMA1, PSMA2, PSMA3, PSMA4, PSMA5, PSMA6, PSMA8, PSMB1, PSMB2, PSMB4, PSME2, RPL22, RPL4, RPS18, TYMP, UBC, VCP, YWHAZ]	56.8966	43.1034	[AGO1, AGO2, AGO3, CIRBP, EIF4A1, EIF4A2, GPX1, HNRNPR, HPRT1, HSPA1A, HSPA8, KHSRP, LARP1, LSM1, LSM4, NCBP1, NT5C2, PATL1, PSMA1, PSMA2, PSMA3, PSMA4, PSMA5, PSMA6, PSMA8, PSMB1, PSMB2, PSMB3, PSMB4, PSMB6, PSMC2, PSMD13, PSMD2, PSMD4, PSME1, PSME2, RACK1, RBM8A, RPL12, RPL13, RPL22, RPL4, RPL7, RPL9, RPS11, RPS12, RPS18, RPS20, RPS24, RPS27A, SAMHD1, TARDBP, TYMP, UBB, UBC, VCP, YWHAB, YWHAZ]
GO:0022618	ribonucleoprotein complex assembly	GO_BiologicalProcess-EBI-QuickGO-GOA_20.11.2017_00h00	4.02654e-08	1.64685e-05	2.68803e-28	6.72006e-27	[4, 5, 6]	Group24	9.86547	22	Specific for Cluster #1	[AGO1, AGO3, CIRBP, DYNC1H1, EIF2S1, EIF4H, MMAB, NCBP1, NOP2, RBMX, RPL12, SART3, SNRNP200, SNRPG, SNU13, SRSF6]	[AGO2, BOP1, LSM4, PATL1, SNRPD3, SRSF1]	72.7273	27.2727	[AGO1, AGO2, AGO3, BOP1, CIRBP, DYNC1H1, EIF2S1, EIF4H, LSM4, MMAB, NCBP1, NOP2, PATL1, RBMX, RPL12, SART3, SNRNP200, SNRPD3, SNRPG, SNU13, SRSF1, SRSF6]
GO:0034622	cellular macromolecular complex assembly	GO_BiologicalProcess-EBI-QuickGO-GOA_20.11.2017_00h00	5.72463e-09	2.43869e-06	2.68803e-28	6.72006e-27	[5]	Group24	5.53991	59	Specific for Cluster #1	[ADD2, AGO1, AGO3, AP2S1, CIRBP, CLIP1, CLTA, DDB1, DMTN, DNM1, DNM2, DYNC1H1, EIF2S1, EIF4H, GARS, HP1BP3, HSPA1A, HSPA4, MMAB, MX1, NAP1L1, NCBP1, NOP2, PSMC2, PSMD13, PSMD4, PTK2, PYCARD, RAB1A, RBMX, RPL12, RPS27A, SART3, SNRNP200, SNRPG, SNU13, SPTAN1, SPTBN4, SRSF6, TBCA, TWF1, UBB, VDAC2]	[AGO2, ANP32B, ANP32E, BOP1, CAPZB, CLTC, DNAJB12, LSM4, MTPN, MYBPC1, PATL1, RAD23B, RDX, SNRPD3, SRSF1, UBC]	72.8814	27.1186	[ADD2, AGO1, AGO2, AGO3, ANP32B, ANP32E, AP2S1, BOP1, CAPZB, CIRBP, CLIP1, CLTA, CLTC, DDB1, DMTN, DNAJB12, DNM1, DNM2, DYNC1H1, EIF2S1, EIF4H, GARS, HP1BP3, HSPA1A, HSPA4, LSM4, MMAB, MTPN, MX1, MYBPC1, NAP1L1, NCBP1, NOP2, PATL1, PSMC2, PSMD13, PSMD4, PTK2, PYCARD, RAB1A, RAD23B, RBMX, RDX, RPL12, RPS27A, SART3, SNRNP200, SNRPD3, SNRPG, SNU13, SPTAN1, SPTBN4, SRSF1, SRSF6, TBCA, TWF1, UBB, UBC,…
GO:0043604	amide biosynthetic process	GO_BiologicalProcess-EBI-QuickGO-GOA_20.11.2017_00h00	4.73981e-11	2.20875e-08	2.68803e-28	6.72006e-27	[5]	Group24	6.60955	54	Specific for Cluster #1	[AARS, AGO1, AGO3, CIRBP, EEF1B2, EEF1D, EEF2, EIF2S1, EIF2S2, EIF3M, EIF4A1, EIF4A2, EIF4H, EIF5A, FARSB, GARS, GCLC, HNRNPR, ILF3, KHSRP, LARP1, LARS, NCBP1, NCL, QARS, RACK1, RARS, RBM4B, RBM8A, RIDA, RPL12, RPL13, RPL7, RPL9, RPS11, RPS12, RPS20, RPS24, RPS27A, WARS2]	[ACO1, ADSL, AGO2, CDK5RAP1, CNDP2, GAPDH, GSS, MTPN, NUP210, RAN, RPL22, RPL4, RPS18, TGFBRAP1]	74.0741	25.9259	[AARS, ACO1, ADSL, AGO1, AGO2, AGO3, CDK5RAP1, CIRBP, CNDP2, EEF1B2, EEF1D, EEF2, EIF2S1, EIF2S2, EIF3M, EIF4A1, EIF4A2, EIF4H, EIF5A, FARSB, GAPDH, GARS, GCLC, GSS, HNRNPR, ILF3, KHSRP, LARP1, LARS, MTPN, NCBP1, NCL, NUP210, QARS, RACK1, RAN, RARS, RBM4B, RBM8A, RIDA, RPL12, RPL13, RPL22, RPL4, RPL7, RPL9, RPS11, RPS12, RPS18, RPS20, RPS24, RPS27A, TGFBRAP1, WARS2]
GO:0072657	protein localization to membrane	GO_BiologicalProcess-EBI-QuickGO-GOA_20.11.2017_00h00	4.9338e-08	2.01299e-05	2.68803e-28	6.72006e-27	[5]	Group24	6.6787	37	Specific for Cluster #1	[ATP1B1, CASP8, CLIP1, DMTN, EZR, FLOT1, HSPA4, MTCL1, PDCD5, RAB11A, RAB11B, RAB8A, RACK1, RPL12, RPL13, RPL7, RPL9, RPS11, RPS12, RPS20, RPS24, RPS27A, SPTBN4, SQSTM1, TNIK, YWHAB]	[AGRN, CLTC, DNAJA3, RDX, RPL22, RPL4, RPS18, YWHAE, YWHAG, YWHAQ, YWHAZ]	70.2703	29.7297	[AGRN, ATP1B1, CASP8, CLIP1, CLTC, DMTN, DNAJA3, EZR, FLOT1, HSPA4, MTCL1, PDCD5, RAB11A, RAB11B, RAB8A, RACK1, RDX, RPL12, RPL13, RPL22, RPL4, RPL7, RPL9, RPS11, RPS12, RPS18, RPS20, RPS24, RPS27A, SPTBN4, SQSTM1, TNIK, YWHAB, YWHAE, YWHAG, YWHAQ, YWHAZ]
GO:0090150	establishment of protein localization to membrane	GO_BiologicalProcess-EBI-QuickGO-GOA_20.11.2017_00h00	1.44595e-09	6.31879e-07	2.68803e-28	6.72006e-27	[4, 5, 6]	Group24	9.45946	28	Specific for Cluster #1	[ATP1B1, CASP8, CLIP1, DMTN, HSPA4, MTCL1, PDCD5, RAB11A, RAB11B, RAB8A, RACK1, RPL12, RPL13, RPL7, RPL9, RPS11, RPS12, RPS20, RPS24, RPS27A, YWHAB]	[RPL22, RPL4, RPS18, YWHAE, YWHAG, YWHAQ, YWHAZ]	75	25	[ATP1B1, CASP8, CLIP1, DMTN, HSPA4, MTCL1, PDCD5, RAB11A, RAB11B, RAB8A, RACK1, RPL12, RPL13, RPL22, RPL4, RPL7, RPL9, RPS11, RPS12, RPS18, RPS20, RPS24, RPS27A, YWHAB, YWHAE, YWHAG, YWHAQ, YWHAZ]
GO:1905477	positive regulation of protein localization to membrane	GO_BiologicalProcess-EBI-QuickGO-GOA_20.11.2017_00h00	4.74074e-05	0.01536	2.68803e-28	6.72006e-27	[3, 4, 5, 6, 7]	Group24	9.91736	12	Specific for Cluster #1	[CASP8, EZR, MTCL1, PDCD5, RAB11A, RACK1, SQSTM1, YWHAB]	[YWHAE, YWHAG, YWHAQ, YWHAZ]	66.6667	33.3333	[CASP8, EZR, MTCL1, PDCD5, RAB11A, RACK1, SQSTM1, YWHAB, YWHAE, YWHAG, YWHAQ, YWHAZ]
GO:0010821	regulation of mitochondrion organization	GO_BiologicalProcess-EBI-QuickGO-GOA_20.11.2017_00h00	4.02938e-06	0.00147475	2.68803e-28	6.72006e-27	[5, 6]	Group24	8.06452	20	Specific for Cluster #1	[ACAA2, CASP8, HSPA1A, HUWE1, LMNA, NPEPPS, PDCD5, PYCARD, SQSTM1, TSC2, UBE2L3, VDAC1, YWHAB]	[GPX1, HSPA1L, MYBPC1, YWHAE, YWHAG, YWHAQ, YWHAZ]	65	35	[ACAA2, CASP8, GPX1, HSPA1A, HSPA1L, HUWE1, LMNA, MYBPC1, NPEPPS, PDCD5, PYCARD, SQSTM1, TSC2, UBE2L3, VDAC1, YWHAB, YWHAE, YWHAG, YWHAQ, YWHAZ]
GO:0019083	viral transcription	GO_BiologicalProcess-EBI-QuickGO-GOA_20.11.2017_00h00	2.31393e-05	0.00782109	2.68803e-28	6.72006e-27	[5, 6]	Group24	8.37696	16	Specific for Cluster #1	[RPL12, RPL13, RPL7, RPL9, RPS11, RPS12, RPS20, RPS24, RPS27A, TARDBP, TRIM21]	[NUP210, RPL22, RPL4, RPS18, TRIM62]	68.75	31.25	[NUP210, RPL12, RPL13, RPL22, RPL4, RPL7, RPL9, RPS11, RPS12, RPS18, RPS20, RPS24, RPS27A, TARDBP, TRIM21, TRIM62]
GO:1905475	regulation of protein localization to membrane	GO_BiologicalProcess-EBI-QuickGO-GOA_20.11.2017_00h00	6.90837e-05	0.0216232	2.68803e-28	6.72006e-27	[5, 6]	Group24	8.43373	14	Specific for Cluster #1	[CASP8, DMTN, EZR, MTCL1, PDCD5, RAB11A, RACK1, SQSTM1, YWHAB]	[CLTC, YWHAE, YWHAG, YWHAQ, YWHAZ]	64.2857	35.7143	[CASP8, CLTC, DMTN, EZR, MTCL1, PDCD5, RAB11A, RACK1, SQSTM1, YWHAB, YWHAE, YWHAG, YWHAQ, YWHAZ]
GO:0006396	RNA processing	GO_BiologicalProcess-EBI-QuickGO-GOA_20.11.2017_00h00	2.45208e-10	1.1206e-07	2.68803e-28	6.72006e-27	[5, 6, 7]	Group24	6.01427	59	Specific for Cluster #1	[AARS, AGO1, AGO3, ALYREF, DHX15, GARS, HNRNPDL, HNRNPK, HNRNPL, HNRNPR, HNRNPUL1, HSPA1A, KHSRP, NCBP1, NONO, NOP2, PRDX6, RBM4B, RBM6, RBM8A, RBMX, RPL12, RPL13, RPL7, RPL9, RPS11, RPS12, RPS20, RPS24, RPS27A, RSL1D1, SART3, SCAF1, SFPQ, SNRNP200, SNRPG, SNU13, SRSF3, SRSF6, TARDBP, UBE2V1, WBP4, ZNF326]	[AGO2, BOP1, CDK5RAP1, DBR1, HNRNPA1, HSPA8, LSM1, LSM4, RPL22, RPL4, RPS18, SAP18, SNRPD3, SRSF1, SRSF2, SRSF4]	72.8814	27.1186	[AARS, AGO1, AGO2, AGO3, ALYREF, BOP1, CDK5RAP1, DBR1, DHX15, GARS, HNRNPA1, HNRNPDL, HNRNPK, HNRNPL, HNRNPR, HNRNPUL1, HSPA1A, HSPA8, KHSRP, LSM1, LSM4, NCBP1, NONO, NOP2, PRDX6, RBM4B, RBM6, RBM8A, RBMX, RPL12, RPL13, RPL22, RPL4, RPL7, RPL9, RPS11, RPS12, RPS18, RPS20, RPS24, RPS27A, RSL1D1, SAP18, SART3, SCAF1, SFPQ, SNRNP200, SNRPD3, SNRPG, SNU13, SRSF1, SRSF2, SRSF3, SRSF4, SRSF6, TARDBP, U…
GO:0006412	translation	GO_BiologicalProcess-EBI-QuickGO-GOA_20.11.2017_00h00	2.0895e-11	9.79978e-09	2.68803e-28	6.72006e-27	[5, 6, 7]	Group24	7.10227	50	Specific for Cluster #1	[AARS, AGO1, AGO3, CIRBP, EEF1B2, EEF1D, EEF2, EIF2S1, EIF2S2, EIF3M, EIF4A1, EIF4A2, EIF4H, EIF5A, FARSB, GARS, HNRNPR, ILF3, KHSRP, LARP1, LARS, NCBP1, NCL, QARS, RACK1, RARS, RBM4B, RBM8A, RIDA, RPL12, RPL13, RPL7, RPL9, RPS11, RPS12, RPS20, RPS24, RPS27A, WARS2]	[ACO1, AGO2, CDK5RAP1, GAPDH, MTPN, NUP210, RAN, RPL22, RPL4, RPS18, TGFBRAP1]	78	22	[AARS, ACO1, AGO1, AGO2, AGO3, CDK5RAP1, CIRBP, EEF1B2, EEF1D, EEF2, EIF2S1, EIF2S2, EIF3M, EIF4A1, EIF4A2, EIF4H, EIF5A, FARSB, GAPDH, GARS, HNRNPR, ILF3, KHSRP, LARP1, LARS, MTPN, NCBP1, NCL, NUP210, QARS, RACK1, RAN, RARS, RBM4B, RBM8A, RIDA, RPL12, RPL13, RPL22, RPL4, RPL7, RPL9, RPS11, RPS12, RPS18, RPS20, RPS24, RPS27A, TGFBRAP1, WARS2]
GO:0006413	translational initiation	GO_BiologicalProcess-EBI-QuickGO-GOA_20.11.2017_00h00	3.92764e-08	1.61033e-05	2.68803e-28	6.72006e-27	[3, 6, 7, 8]	Group24	10.2941	21	Specific for Cluster #1	[EIF2S1, EIF2S2, EIF3M, EIF4A1, EIF4A2, EIF4H, LARP1, NCBP1, RPL12, RPL13, RPL7, RPL9, RPS11, RPS12, RPS20, RPS24, RPS27A]	[AGO2, RPL22, RPL4, RPS18]	80.9524	19.0476	[AGO2, EIF2S1, EIF2S2, EIF3M, EIF4A1, EIF4A2, EIF4H, LARP1, NCBP1, RPL12, RPL13, RPL22, RPL4, RPL7, RPL9, RPS11, RPS12, RPS18, RPS20, RPS24, RPS27A]
GO:0070972	protein localization to endoplasmic reticulum	GO_BiologicalProcess-EBI-QuickGO-GOA_20.11.2017_00h00	3.1598e-05	0.0104589	2.68803e-28	6.72006e-27	[6]	Group24	9.62963	13	Specific for Cluster #1	[RPL12, RPL13, RPL7, RPL9, RPS11, RPS12, RPS20, RPS24, RPS27A]	[HSPA5, RPL22, RPL4, RPS18]	69.2308	30.7692	[HSPA5, RPL12, RPL13, RPL22, RPL4, RPL7, RPL9, RPS11, RPS12, RPS18, RPS20, RPS24, RPS27A]
GO:1903749	positive regulation of establishment of protein localization to mitochondrion	GO_BiologicalProcess-EBI-QuickGO-GOA_20.11.2017_00h00	6.52775e-05	0.0206277	2.68803e-28	6.72006e-27	[3, 4, 5, 6, 7, 8, 9]	Group24	9.6	12	None Specific Cluster	[CASP8, HUWE1, NPEPPS, PDCD5, UBE2L3, YWHAB]	[HSPA1L, MYBPC1, YWHAE, YWHAG, YWHAQ, YWHAZ]	50	50	[CASP8, HSPA1L, HUWE1, MYBPC1, NPEPPS, PDCD5, UBE2L3, YWHAB, YWHAE, YWHAG, YWHAQ, YWHAZ]
GO:0006402	mRNA catabolic process	GO_BiologicalProcess-EBI-QuickGO-GOA_20.11.2017_00h00	2.23011e-24	1.38044e-21	2.68803e-28	6.72006e-27	[5, 6, 7, 8]	Group24	14.2458	51	None Specific Cluster	[AGO1, AGO3, CIRBP, EIF4A1, EIF4A2, HNRNPR, HSPA1A, KHSRP, LARP1, NCBP1, PSMB3, PSMB6, PSMC2, PSMD13, PSMD2, PSMD4, PSME1, RBM8A, RPL12, RPL13, RPL7, RPL9, RPS11, RPS12, RPS20, RPS24, RPS27A, TARDBP, UBB, YWHAB]	[AGO2, HSPA8, LSM1, LSM4, PATL1, PSMA1, PSMA2, PSMA3, PSMA4, PSMA5, PSMA6, PSMA8, PSMB1, PSMB2, PSMB4, PSME2, RPL22, RPL4, RPS18, UBC, YWHAZ]	58.8235	41.1765	[AGO1, AGO2, AGO3, CIRBP, EIF4A1, EIF4A2, HNRNPR, HSPA1A, HSPA8, KHSRP, LARP1, LSM1, LSM4, NCBP1, PATL1, PSMA1, PSMA2, PSMA3, PSMA4, PSMA5, PSMA6, PSMA8, PSMB1, PSMB2, PSMB3, PSMB4, PSMB6, PSMC2, PSMD13, PSMD2, PSMD4, PSME1, PSME2, RBM8A, RPL12, RPL13, RPL22, RPL4, RPL7, RPL9, RPS11, RPS12, RPS18, RPS20, RPS24, RPS27A, TARDBP, UBB, UBC, YWHAB, YWHAZ]
GO:0006605	protein targeting	GO_BiologicalProcess-EBI-QuickGO-GOA_20.11.2017_00h00	2.81445e-07	0.000110327	2.68803e-28	6.72006e-27	[5, 6, 7, 8, 9]	Group24	7.07547	30	Specific for Cluster #1	[DMTN, HSPA4, HUWE1, LARS, MTCL1, NPEPPS, PDCD5, RPL12, RPL13, RPL7, RPL9, RPS11, RPS12, RPS20, RPS24, RPS27A, TIMM44, UBE2L3, YWHAB]	[HSPA1L, HSPA8, MYBPC1, RAB7A, RPL22, RPL4, RPS18, YWHAE, YWHAG, YWHAQ, YWHAZ]	63.3333	36.6667	[DMTN, HSPA1L, HSPA4, HSPA8, HUWE1, LARS, MTCL1, MYBPC1, NPEPPS, PDCD5, RAB7A, RPL12, RPL13, RPL22, RPL4, RPL7, RPL9, RPS11, RPS12, RPS18, RPS20, RPS24, RPS27A, TIMM44, UBE2L3, YWHAB, YWHAE, YWHAG, YWHAQ, YWHAZ]
GO:0000956	nuclear-transcribed mRNA catabolic process	GO_BiologicalProcess-EBI-QuickGO-GOA_20.11.2017_00h00	1.23458e-07	4.95067e-05	2.68803e-28	6.72006e-27	[6, 7, 8, 9]	Group24	9.63303	21	Specific for Cluster #1	[AGO1, EIF4A1, EIF4A2, NCBP1, RBM8A, RPL12, RPL13, RPL7, RPL9, RPS11, RPS12, RPS20, RPS24, RPS27A]	[AGO2, LSM1, LSM4, PATL1, RPL22, RPL4, RPS18]	66.6667	33.3333	[AGO1, AGO2, EIF4A1, EIF4A2, LSM1, LSM4, NCBP1, PATL1, RBM8A, RPL12, RPL13, RPL22, RPL4, RPL7, RPL9, RPS11, RPS12, RPS18, RPS20, RPS24, RPS27A]
GO:0006612	protein targeting to membrane	GO_BiologicalProcess-EBI-QuickGO-GOA_20.11.2017_00h00	0.000145852	0.0417137	2.68803e-28	6.72006e-27	[5, 6, 7, 8, 9, 10]	Group24	7.86517	14	Specific for Cluster #1	[DMTN, MTCL1, RPL12, RPL13, RPL7, RPL9, RPS11, RPS12, RPS20, RPS24, RPS27A]	[RPL22, RPL4, RPS18]	78.5714	21.4286	[DMTN, MTCL1, RPL12, RPL13, RPL22, RPL4, RPL7, RPL9, RPS11, RPS12, RPS18, RPS20, RPS24, RPS27A]
GO:0000184	nuclear-transcribed mRNA catabolic process, nonsense-mediated decay	GO_BiologicalProcess-EBI-QuickGO-GOA_20.11.2017_00h00	3.92874e-06	0.00144578	2.68803e-28	6.72006e-27	[7, 8, 9, 10]	Group24	10.8527	14	Specific for Cluster #1	[NCBP1, RBM8A, RPL12, RPL13, RPL7, RPL9, RPS11, RPS12, RPS20, RPS24, RPS27A]	[RPL22, RPL4, RPS18]	78.5714	21.4286	[NCBP1, RBM8A, RPL12, RPL13, RPL22, RPL4, RPL7, RPL9, RPS11, RPS12, RPS18, RPS20, RPS24, RPS27A]
GO:0006614	SRP-dependent cotranslational protein targeting to membrane	GO_BiologicalProcess-EBI-QuickGO-GOA_20.11.2017_00h00	6.79586e-06	0.00243292	2.68803e-28	6.72006e-27	[7, 8, 9, 10, 11, 12]	Group24	12	12	Specific for Cluster #1	[RPL12, RPL13, RPL7, RPL9, RPS11, RPS12, RPS20, RPS24, RPS27A]	[RPL22, RPL4, RPS18]	75	25	[RPL12, RPL13, RPL22, RPL4, RPL7, RPL9, RPS11, RPS12, RPS18, RPS20, RPS24, RPS27A]
KEGG:03050	Proteasome	KEGG_20.11.2017	8.26239e-18	4.75087e-15	9.4939e-25	2.27854e-23	[-1]	Group25	40	18	Specific for Cluster #2	[PSMB3, PSMB6, PSMC2, PSMD13, PSMD2, PSMD4, PSME1]	[PSMA1, PSMA2, PSMA3, PSMA4, PSMA5, PSMA6, PSMA8, PSMB1, PSMB2, PSMB4, PSME2]	38.8889	61.1111	[PSMA1, PSMA2, PSMA3, PSMA4, PSMA5, PSMA6, PSMA8, PSMB1, PSMB2, PSMB3, PSMB4, PSMB6, PSMC2, PSMD13, PSMD2, PSMD4, PSME1, PSME2]
R-HSA:109581	Apoptosis	REACTOME_Pathways_20.11.2017	2.38321e-19	1.41563e-16	9.4939e-25	2.27854e-23	[-1]	Group25	18.8235	32	None Specific Cluster	[CASP8, DBNL, LMNA, PSMB3, PSMB6, PSMC2, PSMD13, PSMD2, PSMD4, PSME1, PTK2, RPS27A, SPTAN1, UBB, YWHAB]	[FADD, PSMA1, PSMA2, PSMA3, PSMA4, PSMA5, PSMA6, PSMA8, PSMB1, PSMB2, PSMB4, PSME2, UBC, YWHAE, YWHAG, YWHAQ, YWHAZ]	46.875	53.125	[CASP8, DBNL, FADD, LMNA, PSMA1, PSMA2, PSMA3, PSMA4, PSMA5, PSMA6, PSMA8, PSMB1, PSMB2, PSMB3, PSMB4, PSMB6, PSMC2, PSMD13, PSMD2, PSMD4, PSME1, PSME2, PTK2, RPS27A, SPTAN1, UBB, UBC, YWHAB, YWHAE, YWHAG, YWHAQ, YWHAZ]
R-HSA:1168372	Downstream signaling events of B Cell Receptor (BCR)	REACTOME_Pathways_20.11.2017	4.85715e-17	2.73943e-14	9.4939e-25	2.27854e-23	[-1]	Group25	26.506	22	None Specific Cluster	[PSMB3, PSMB6, PSMC2, PSMD13, PSMD2, PSMD4, PSME1, RPS27A, UBB]	[CALM1, PSMA1, PSMA2, PSMA3, PSMA4, PSMA5, PSMA6, PSMA8, PSMB1, PSMB2, PSMB4, PSME2, UBC]	40.9091	59.0909	[CALM1, PSMA1, PSMA2, PSMA3, PSMA4, PSMA5, PSMA6, PSMA8, PSMB1, PSMB2, PSMB3, PSMB4, PSMB6, PSMC2, PSMD13, PSMD2, PSMD4, PSME1, PSME2, RPS27A, UBB, UBC]
R-HSA:1169091	Activation of NF-kappaB in B cells	REACTOME_Pathways_20.11.2017	5.42572e-18	3.13607e-15	9.4939e-25	2.27854e-23	[-1]	Group25	31.3433	21	None Specific Cluster	[PSMB3, PSMB6, PSMC2, PSMD13, PSMD2, PSMD4, PSME1, RPS27A, UBB]	[PSMA1, PSMA2, PSMA3, PSMA4, PSMA5, PSMA6, PSMA8, PSMB1, PSMB2, PSMB4, PSME2, UBC]	42.8571	57.1429	[PSMA1, PSMA2, PSMA3, PSMA4, PSMA5, PSMA6, PSMA8, PSMB1, PSMB2, PSMB3, PSMB4, PSMB6, PSMC2, PSMD13, PSMD2, PSMD4, PSME1, PSME2, RPS27A, UBB, UBC]
R-HSA:1234174	Regulation of Hypoxia-inducible Factor (HIF) by oxygen	REACTOME_Pathways_20.11.2017	4.35327e-18	2.52489e-15	9.4939e-25	2.27854e-23	[-1]	Group25	29.3333	22	None Specific Cluster	[PSMB3, PSMB6, PSMC2, PSMD13, PSMD2, PSMD4, PSME1, RPS27A, UBB]	[HIF3A, PSMA1, PSMA2, PSMA3, PSMA4, PSMA5, PSMA6, PSMA8, PSMB1, PSMB2, PSMB4, PSME2, UBC]	40.9091	59.0909	[HIF3A, PSMA1, PSMA2, PSMA3, PSMA4, PSMA5, PSMA6, PSMA8, PSMB1, PSMB2, PSMB3, PSMB4, PSMB6, PSMC2, PSMD13, PSMD2, PSMD4, PSME1, PSME2, RPS27A, UBB, UBC]
R-HSA:1234176	Oxygen-dependent proline hydroxylation of Hypoxia-inducible Factor Alpha	REACTOME_Pathways_20.11.2017	1.88653e-19	1.12249e-16	9.4939e-25	2.27854e-23	[-1]	Group25	33.3333	22	None Specific Cluster	[PSMB3, PSMB6, PSMC2, PSMD13, PSMD2, PSMD4, PSME1, RPS27A, UBB]	[HIF3A, PSMA1, PSMA2, PSMA3, PSMA4, PSMA5, PSMA6, PSMA8, PSMB1, PSMB2, PSMB4, PSME2, UBC]	40.9091	59.0909	[HIF3A, PSMA1, PSMA2, PSMA3, PSMA4, PSMA5, PSMA6, PSMA8, PSMB1, PSMB2, PSMB3, PSMB4, PSMB6, PSMC2, PSMD13, PSMD2, PSMD4, PSME1, PSME2, RPS27A, UBB, UBC]
R-HSA:1236974	ER-Phagosome pathway	REACTOME_Pathways_20.11.2017	6.43206e-17	3.61482e-14	9.4939e-25	2.27854e-23	[-1]	Group25	26.1905	22	None Specific Cluster	[PSMB3, PSMB6, PSMC2, PSMD13, PSMD2, PSMD4, PSME1, RPS27A, UBB]	[HLA-A, PSMA1, PSMA2, PSMA3, PSMA4, PSMA5, PSMA6, PSMA8, PSMB1, PSMB2, PSMB4, PSME2, UBC]	40.9091	59.0909	[HLA-A, PSMA1, PSMA2, PSMA3, PSMA4, PSMA5, PSMA6, PSMA8, PSMB1, PSMB2, PSMB3, PSMB4, PSMB6, PSMC2, PSMD13, PSMD2, PSMD4, PSME1, PSME2, RPS27A, UBB, UBC]
R-HSA:1236975	Antigen processing-Cross presentation	REACTOME_Pathways_20.11.2017	2.86076e-16	1.57628e-13	9.4939e-25	2.27854e-23	[-1]	Group25	23	23	None Specific Cluster	[MRC2, PSMB3, PSMB6, PSMC2, PSMD13, PSMD2, PSMD4, PSME1, RPS27A, UBB]	[HLA-A, PSMA1, PSMA2, PSMA3, PSMA4, PSMA5, PSMA6, PSMA8, PSMB1, PSMB2, PSMB4, PSME2, UBC]	43.4783	56.5217	[HLA-A, MRC2, PSMA1, PSMA2, PSMA3, PSMA4, PSMA5, PSMA6, PSMA8, PSMB1, PSMB2, PSMB3, PSMB4, PSMB6, PSMC2, PSMD13, PSMD2, PSMD4, PSME1, PSME2, RPS27A, UBB, UBC]
R-HSA:1236978	Cross-presentation of soluble exogenous antigens (endosomes)	REACTOME_Pathways_20.11.2017	3.18122e-18	1.84829e-15	9.4939e-25	2.27854e-23	[-1]	Group25	38	19	None Specific Cluster	[MRC2, PSMB3, PSMB6, PSMC2, PSMD13, PSMD2, PSMD4, PSME1]	[PSMA1, PSMA2, PSMA3, PSMA4, PSMA5, PSMA6, PSMA8, PSMB1, PSMB2, PSMB4, PSME2]	42.1053	57.8947	[MRC2, PSMA1, PSMA2, PSMA3, PSMA4, PSMA5, PSMA6, PSMA8, PSMB1, PSMB2, PSMB3, PSMB4, PSMB6, PSMC2, PSMD13, PSMD2, PSMD4, PSME1, PSME2]
R-HSA:1257604	PIP3 activates AKT signaling	REACTOME_Pathways_20.11.2017	2.33271e-10	1.07071e-07	9.4939e-25	2.27854e-23	[-1]	Group25	10.5882	27	None Specific Cluster	[AGO1, AGO3, FRK, PHLPP2, PSMB3, PSMB6, PSMC2, PSMD13, PSMD2, PSMD4, PSME1, RPS27A, TSC2, UBB]	[AGO2, PSMA1, PSMA2, PSMA3, PSMA4, PSMA5, PSMA6, PSMA8, PSMB1, PSMB2, PSMB4, PSME2, UBC]	51.8519	48.1481	[AGO1, AGO2, AGO3, FRK, PHLPP2, PSMA1, PSMA2, PSMA3, PSMA4, PSMA5, PSMA6, PSMA8, PSMB1, PSMB2, PSMB3, PSMB4, PSMB6, PSMC2, PSMD13, PSMD2, PSMD4, PSME1, PSME2, RPS27A, TSC2, UBB, UBC]
R-HSA:156827	L13a-mediated translational silencing of Ceruloplasmin expression	REACTOME_Pathways_20.11.2017	3.44757e-10	1.56175e-07	9.4939e-25	2.27854e-23	[-1]	Group25	15.9292	18	Specific for Cluster #1	[EIF2S1, EIF2S2, EIF3M, EIF4A1, EIF4A2, EIF4H, RPL12, RPL13, RPL7, RPL9, RPS11, RPS12, RPS20, RPS24, RPS27A]	[RPL22, RPL4, RPS18]	83.3333	16.6667	[EIF2S1, EIF2S2, EIF3M, EIF4A1, EIF4A2, EIF4H, RPL12, RPL13, RPL22, RPL4, RPL7, RPL9, RPS11, RPS12, RPS18, RPS20, RPS24, RPS27A]
R-HSA:156842	Eukaryotic Translation Elongation	REACTOME_Pathways_20.11.2017	1.00767e-08	4.25238e-06	9.4939e-25	2.27854e-23	[-1]	Group25	15.9574	15	Specific for Cluster #1	[EEF1B2, EEF1D, EEF2, RPL12, RPL13, RPL7, RPL9, RPS11, RPS12, RPS20, RPS24, RPS27A]	[RPL22, RPL4, RPS18]	80	20	[EEF1B2, EEF1D, EEF2, RPL12, RPL13, RPL22, RPL4, RPL7, RPL9, RPS11, RPS12, RPS18, RPS20, RPS24, RPS27A]
R-HSA:156902	Peptide chain elongation	REACTOME_Pathways_20.11.2017	3.25613e-07	0.000126989	9.4939e-25	2.27854e-23	[-1]	Group25	14.4444	13	Specific for Cluster #1	[EEF2, RPL12, RPL13, RPL7, RPL9, RPS11, RPS12, RPS20, RPS24, RPS27A]	[RPL22, RPL4, RPS18]	76.9231	23.0769	[EEF2, RPL12, RPL13, RPL22, RPL4, RPL7, RPL9, RPS11, RPS12, RPS18, RPS20, RPS24, RPS27A]
R-HSA:162906	HIV Infection	REACTOME_Pathways_20.11.2017	1.062e-11	5.05513e-09	9.4939e-25	2.27854e-23	[-1]	Group25	11.6667	28	None Specific Cluster	[AP2S1, NCBP1, PSMB3, PSMB6, PSMC2, PSMD13, PSMD2, PSMD4, PSME1, RANBP1, RPS27A, SSRP1, UBB]	[BANF1, NUP210, PSMA1, PSMA2, PSMA3, PSMA4, PSMA5, PSMA6, PSMA8, PSMB1, PSMB2, PSMB4, PSME2, RAN, UBC]	46.4286	53.5714	[AP2S1, BANF1, NCBP1, NUP210, PSMA1, PSMA2, PSMA3, PSMA4, PSMA5, PSMA6, PSMA8, PSMB1, PSMB2, PSMB3, PSMB4, PSMB6, PSMC2, PSMD13, PSMD2, PSMD4, PSME1, PSME2, RAN, RANBP1, RPS27A, SSRP1, UBB, UBC]
R-HSA:162909	Host Interactions of HIV factors	REACTOME_Pathways_20.11.2017	2.75051e-16	1.51828e-13	9.4939e-25	2.27854e-23	[-1]	Group25	19.403	26	None Specific Cluster	[AP2S1, PSMB3, PSMB6, PSMC2, PSMD13, PSMD2, PSMD4, PSME1, RANBP1, RPS27A, UBB]	[BANF1, NUP210, PSMA1, PSMA2, PSMA3, PSMA4, PSMA5, PSMA6, PSMA8, PSMB1, PSMB2, PSMB4, PSME2, RAN, UBC]	42.3077	57.6923	[AP2S1, BANF1, NUP210, PSMA1, PSMA2, PSMA3, PSMA4, PSMA5, PSMA6, PSMA8, PSMB1, PSMB2, PSMB3, PSMB4, PSMB6, PSMC2, PSMD13, PSMD2, PSMD4, PSME1, PSME2, RAN, RANBP1, RPS27A, UBB, UBC]
R-HSA:168249	Innate Immune System	REACTOME_Pathways_20.11.2017	5.98686e-14	3.08922e-11	9.4939e-25	2.27854e-23	[-1]	Group25	6.56045	70	Specific for Cluster #1	[ACTG1, ACTR1B, ATP6V1A, CASP8, CAT, COPB1, DBNL, DNM1, DNM2, DYNC1H1, EEF2, FRK, GDI2, HSPA1A, HUWE1, ILF2, IQGAP1, MGST1, MYH9, NIT2, NOS1, PRDX4, PRDX6, PRSS3, PSMB3, PSMB6, PSMC2, PSMD13, PSMD2, PSMD4, PSME1, PTK2, PYCARD, RAB5B, RAB5C, RPS27A, SERPINB1, SERPINB6, SPTAN1, STAT6, TRIM21, UBB, UBE2V1]	[ACTB, ALAD, ATP6V1B2, CALM1, CD209, FADD, FTH1, HSPA6, HSPA8, NME2, PGAM1, PSMA1, PSMA2, PSMA3, PSMA4, PSMA5, PSMA6, PSMA8, PSMB1, PSMB2, PSMB4, PSME2, RAB7A, RAP2B, TXN, UBC, VCP]	61.4286	38.5714	[ACTB, ACTG1, ACTR1B, ALAD, ATP6V1A, ATP6V1B2, CALM1, CASP8, CAT, CD209, COPB1, DBNL, DNM1, DNM2, DYNC1H1, EEF2, FADD, FRK, FTH1, GDI2, HSPA1A, HSPA6, HSPA8, HUWE1, ILF2, IQGAP1, MGST1, MYH9, NIT2, NME2, NOS1, PGAM1, PRDX4, PRDX6, PRSS3, PSMA1, PSMA2, PSMA3, PSMA4, PSMA5, PSMA6, PSMA8, PSMB1, PSMB2, PSMB3, PSMB4, PSMB6, PSMC2, PSMD13, PSMD2, PSMD4, PSME1, PSME2, PTK2, PYCARD, RAB5B, RAB5C, RAB7A,…
R-HSA:168254	Influenza Infection	REACTOME_Pathways_20.11.2017	1.68279e-07	6.69749e-05	9.4939e-25	2.27854e-23	[-1]	Group25	10.8434	18	Specific for Cluster #1	[CLTA, HSPA1A, KPNA4, RPL12, RPL13, RPL7, RPL9, RPS11, RPS12, RPS20, RPS24, RPS27A]	[CLTC, NUP210, RAN, RPL22, RPL4, RPS18]	66.6667	33.3333	[CLTA, CLTC, HSPA1A, KPNA4, NUP210, RAN, RPL12, RPL13, RPL22, RPL4, RPL7, RPL9, RPS11, RPS12, RPS18, RPS20, RPS24, RPS27A]
R-HSA:168255	Influenza Life Cycle	REACTOME_Pathways_20.11.2017	3.1454e-07	0.000122985	9.4939e-25	2.27854e-23	[-1]	Group25	10.9677	17	Specific for Cluster #1	[CLTA, HSPA1A, RPL12, RPL13, RPL7, RPL9, RPS11, RPS12, RPS20, RPS24, RPS27A]	[CLTC, NUP210, RAN, RPL22, RPL4, RPS18]	64.7059	35.2941	[CLTA, CLTC, HSPA1A, NUP210, RAN, RPL12, RPL13, RPL22, RPL4, RPL7, RPL9, RPS11, RPS12, RPS18, RPS20, RPS24, RPS27A]
R-HSA:168273	Influenza Viral RNA Transcription and Replication	REACTOME_Pathways_20.11.2017	6.67445e-05	0.0209578	9.4939e-25	2.27854e-23	[-1]	Group25	8.96552	13	Specific for Cluster #1	[RPL12, RPL13, RPL7, RPL9, RPS11, RPS12, RPS20, RPS24, RPS27A]	[NUP210, RPL22, RPL4, RPS18]	69.2308	30.7692	[NUP210, RPL12, RPL13, RPL22, RPL4, RPL7, RPL9, RPS11, RPS12, RPS18, RPS20, RPS24, RPS27A]
R-HSA:169911	Regulation of Apoptosis	REACTOME_Pathways_20.11.2017	1.83098e-20	1.10225e-17	9.4939e-25	2.27854e-23	[-1]	Group25	39.6226	21	None Specific Cluster	[PSMB3, PSMB6, PSMC2, PSMD13, PSMD2, PSMD4, PSME1, RPS27A, UBB]	[PSMA1, PSMA2, PSMA3, PSMA4, PSMA5, PSMA6, PSMA8, PSMB1, PSMB2, PSMB4, PSME2, UBC]	42.8571	57.1429	[PSMA1, PSMA2, PSMA3, PSMA4, PSMA5, PSMA6, PSMA8, PSMB1, PSMB2, PSMB3, PSMB4, PSMB6, PSMC2, PSMD13, PSMD2, PSMD4, PSME1, PSME2, RPS27A, UBB, UBC]
R-HSA:174084	Autodegradation of Cdh1 by Cdh1:APC/C	REACTOME_Pathways_20.11.2017	2.54883e-17	1.45029e-14	9.4939e-25	2.27854e-23	[-1]	Group25	31.746	20	None Specific Cluster	[PSMB3, PSMB6, PSMC2, PSMD13, PSMD2, PSMD4, PSME1, RPS27A, UBB]	[PSMA1, PSMA2, PSMA3, PSMA4, PSMA5, PSMA6, PSMB1, PSMB2, PSMB4, PSME2, UBC]	45	55	[PSMA1, PSMA2, PSMA3, PSMA4, PSMA5, PSMA6, PSMB1, PSMB2, PSMB3, PSMB4, PSMB6, PSMC2, PSMD13, PSMD2, PSMD4, PSME1, PSME2, RPS27A, UBB, UBC]
R-HSA:174113	SCF-beta-TrCP mediated degradation of Emi1	REACTOME_Pathways_20.11.2017	4.63031e-20	2.77356e-17	9.4939e-25	2.27854e-23	[-1]	Group25	38.1818	21	None Specific Cluster	[PSMB3, PSMB6, PSMC2, PSMD13, PSMD2, PSMD4, PSME1, RPS27A, UBB]	[PSMA1, PSMA2, PSMA3, PSMA4, PSMA5, PSMA6, PSMA8, PSMB1, PSMB2, PSMB4, PSME2, UBC]	42.8571	57.1429	[PSMA1, PSMA2, PSMA3, PSMA4, PSMA5, PSMA6, PSMA8, PSMB1, PSMB2, PSMB3, PSMB4, PSMB6, PSMC2, PSMD13, PSMD2, PSMD4, PSME1, PSME2, RPS27A, UBB, UBC]
R-HSA:174143	APC/C-mediated degradation of cell cycle proteins	REACTOME_Pathways_20.11.2017	1.55813e-15	8.36718e-13	9.4939e-25	2.27854e-23	[-1]	Group25	24.4186	21	None Specific Cluster	[PSMB3, PSMB6, PSMC2, PSMD13, PSMD2, PSMD4, PSME1, RPS27A, UBB]	[PSMA1, PSMA2, PSMA3, PSMA4, PSMA5, PSMA6, PSMA8, PSMB1, PSMB2, PSMB4, PSME2, UBC]	42.8571	57.1429	[PSMA1, PSMA2, PSMA3, PSMA4, PSMA5, PSMA6, PSMA8, PSMB1, PSMB2, PSMB3, PSMB4, PSMB6, PSMC2, PSMD13, PSMD2, PSMD4, PSME1, PSME2, RPS27A, UBB, UBC]
R-HSA:174154	APC/C:Cdc20 mediated degradation of Securin	REACTOME_Pathways_20.11.2017	5.42572e-18	3.13607e-15	9.4939e-25	2.27854e-23	[-1]	Group25	31.3433	21	None Specific Cluster	[PSMB3, PSMB6, PSMC2, PSMD13, PSMD2, PSMD4, PSME1, RPS27A, UBB]	[PSMA1, PSMA2, PSMA3, PSMA4, PSMA5, PSMA6, PSMA8, PSMB1, PSMB2, PSMB4, PSME2, UBC]	42.8571	57.1429	[PSMA1, PSMA2, PSMA3, PSMA4, PSMA5, PSMA6, PSMA8, PSMB1, PSMB2, PSMB3, PSMB4, PSMB6, PSMC2, PSMD13, PSMD2, PSMD4, PSME1, PSME2, RPS27A, UBB, UBC]
R-HSA:174178	APC/C:Cdh1 mediated degradation of Cdc20 and other APC/C:Cdh1 targeted proteins in late mitosis/early G1	REACTOME_Pathways_20.11.2017	2.88296e-17	1.63464e-14	9.4939e-25	2.27854e-23	[-1]	Group25	29.1667	21	None Specific Cluster	[PSMB3, PSMB6, PSMC2, PSMD13, PSMD2, PSMD4, PSME1, RPS27A, UBB]	[PSMA1, PSMA2, PSMA3, PSMA4, PSMA5, PSMA6, PSMA8, PSMB1, PSMB2, PSMB4, PSME2, UBC]	42.8571	57.1429	[PSMA1, PSMA2, PSMA3, PSMA4, PSMA5, PSMA6, PSMA8, PSMB1, PSMB2, PSMB3, PSMB4, PSMB6, PSMC2, PSMD13, PSMD2, PSMD4, PSME1, PSME2, RPS27A, UBB, UBC]
R-HSA:174184	Cdc20:Phospho-APC/C mediated degradation of Cyclin A	REACTOME_Pathways_20.11.2017	2.88296e-17	1.63464e-14	9.4939e-25	2.27854e-23	[-1]	Group25	29.1667	21	None Specific Cluster	[PSMB3, PSMB6, PSMC2, PSMD13, PSMD2, PSMD4, PSME1, RPS27A, UBB]	[PSMA1, PSMA2, PSMA3, PSMA4, PSMA5, PSMA6, PSMA8, PSMB1, PSMB2, PSMB4, PSME2, UBC]	42.8571	57.1429	[PSMA1, PSMA2, PSMA3, PSMA4, PSMA5, PSMA6, PSMA8, PSMB1, PSMB2, PSMB3, PSMB4, PSMB6, PSMC2, PSMD13, PSMD2, PSMD4, PSME1, PSME2, RPS27A, UBB, UBC]
R-HSA:176408	Regulation of APC/C activators between G1/S and early anaphase	REACTOME_Pathways_20.11.2017	3.1394e-16	1.72667e-13	9.4939e-25	2.27854e-23	[-1]	Group25	26.25	21	None Specific Cluster	[PSMB3, PSMB6, PSMC2, PSMD13, PSMD2, PSMD4, PSME1, RPS27A, UBB]	[PSMA1, PSMA2, PSMA3, PSMA4, PSMA5, PSMA6, PSMA8, PSMB1, PSMB2, PSMB4, PSME2, UBC]	42.8571	57.1429	[PSMA1, PSMA2, PSMA3, PSMA4, PSMA5, PSMA6, PSMA8, PSMB1, PSMB2, PSMB3, PSMB4, PSMB6, PSMC2, PSMD13, PSMD2, PSMD4, PSME1, PSME2, RPS27A, UBB, UBC]
R-HSA:176409	APC/C:Cdc20 mediated degradation of mitotic proteins	REACTOME_Pathways_20.11.2017	7.3287e-17	4.10407e-14	9.4939e-25	2.27854e-23	[-1]	Group25	28	21	None Specific Cluster	[PSMB3, PSMB6, PSMC2, PSMD13, PSMD2, PSMD4, PSME1, RPS27A, UBB]	[PSMA1, PSMA2, PSMA3, PSMA4, PSMA5, PSMA6, PSMA8, PSMB1, PSMB2, PSMB4, PSME2, UBC]	42.8571	57.1429	[PSMA1, PSMA2, PSMA3, PSMA4, PSMA5, PSMA6, PSMA8, PSMB1, PSMB2, PSMB3, PSMB4, PSMB6, PSMC2, PSMD13, PSMD2, PSMD4, PSME1, PSME2, RPS27A, UBB, UBC]
R-HSA:176814	Activation of APC/C and APC/C:Cdc20 mediated degradation of mitotic proteins	REACTOME_Pathways_20.11.2017	9.89828e-17	5.52324e-14	9.4939e-25	2.27854e-23	[-1]	Group25	27.6316	21	None Specific Cluster	[PSMB3, PSMB6, PSMC2, PSMD13, PSMD2, PSMD4, PSME1, RPS27A, UBB]	[PSMA1, PSMA2, PSMA3, PSMA4, PSMA5, PSMA6, PSMA8, PSMB1, PSMB2, PSMB4, PSME2, UBC]	42.8571	57.1429	[PSMA1, PSMA2, PSMA3, PSMA4, PSMA5, PSMA6, PSMA8, PSMB1, PSMB2, PSMB3, PSMB4, PSMB6, PSMC2, PSMD13, PSMD2, PSMD4, PSME1, PSME2, RPS27A, UBB, UBC]
R-HSA:179419	APC:Cdc20 mediated degradation of cell cycle proteins prior to satisfation of the cell cycle checkpoint	REACTOME_Pathways_20.11.2017	3.95585e-17	2.23505e-14	9.4939e-25	2.27854e-23	[-1]	Group25	28.7671	21	None Specific Cluster	[PSMB3, PSMB6, PSMC2, PSMD13, PSMD2, PSMD4, PSME1, RPS27A, UBB]	[PSMA1, PSMA2, PSMA3, PSMA4, PSMA5, PSMA6, PSMA8, PSMB1, PSMB2, PSMB4, PSME2, UBC]	42.8571	57.1429	[PSMA1, PSMA2, PSMA3, PSMA4, PSMA5, PSMA6, PSMA8, PSMB1, PSMB2, PSMB3, PSMB4, PSMB6, PSMC2, PSMD13, PSMD2, PSMD4, PSME1, PSME2, RPS27A, UBB, UBC]
R-HSA:1799339	SRP-dependent cotranslational protein targeting to membrane	REACTOME_Pathways_20.11.2017	2.39223e-05	0.00803789	9.4939e-25	2.27854e-23	[-1]	Group25	10.6195	12	Specific for Cluster #1	[RPL12, RPL13, RPL7, RPL9, RPS11, RPS12, RPS20, RPS24, RPS27A]	[RPL22, RPL4, RPS18]	75	25	[RPL12, RPL13, RPL22, RPL4, RPL7, RPL9, RPS11, RPS12, RPS18, RPS20, RPS24, RPS27A]
R-HSA:180534	Vpu mediated degradation of CD4	REACTOME_Pathways_20.11.2017	1.13103e-20	6.82012e-18	9.4939e-25	2.27854e-23	[-1]	Group25	40.3846	21	None Specific Cluster	[PSMB3, PSMB6, PSMC2, PSMD13, PSMD2, PSMD4, PSME1, RPS27A, UBB]	[PSMA1, PSMA2, PSMA3, PSMA4, PSMA5, PSMA6, PSMA8, PSMB1, PSMB2, PSMB4, PSME2, UBC]	42.8571	57.1429	[PSMA1, PSMA2, PSMA3, PSMA4, PSMA5, PSMA6, PSMA8, PSMB1, PSMB2, PSMB3, PSMB4, PSMB6, PSMC2, PSMD13, PSMD2, PSMD4, PSME1, PSME2, RPS27A, UBB, UBC]
R-HSA:180585	Vif-mediated degradation of APOBEC3G	REACTOME_Pathways_20.11.2017	4.63031e-20	2.77356e-17	9.4939e-25	2.27854e-23	[-1]	Group25	38.1818	21	None Specific Cluster	[PSMB3, PSMB6, PSMC2, PSMD13, PSMD2, PSMD4, PSME1, RPS27A, UBB]	[PSMA1, PSMA2, PSMA3, PSMA4, PSMA5, PSMA6, PSMA8, PSMB1, PSMB2, PSMB4, PSME2, UBC]	42.8571	57.1429	[PSMA1, PSMA2, PSMA3, PSMA4, PSMA5, PSMA6, PSMA8, PSMB1, PSMB2, PSMB3, PSMB4, PSMB6, PSMC2, PSMD13, PSMD2, PSMD4, PSME1, PSME2, RPS27A, UBB, UBC]
R-HSA:187577	SCF(Skp2)-mediated degradation of p27/p21	REACTOME_Pathways_20.11.2017	3.91827e-19	2.31962e-16	9.4939e-25	2.27854e-23	[-1]	Group25	35	21	None Specific Cluster	[CCNE1, PSMB3, PSMB6, PSMC2, PSMD13, PSMD2, PSMD4, PSME1, RPS27A, UBB]	[PSMA1, PSMA2, PSMA3, PSMA4, PSMA5, PSMA6, PSMB1, PSMB2, PSMB4, PSME2, UBC]	47.619	52.381	[CCNE1, PSMA1, PSMA2, PSMA3, PSMA4, PSMA5, PSMA6, PSMB1, PSMB2, PSMB3, PSMB4, PSMB6, PSMC2, PSMD13, PSMD2, PSMD4, PSME1, PSME2, RPS27A, UBB, UBC]
R-HSA:192823	Viral mRNA Translation	REACTOME_Pathways_20.11.2017	7.54187e-06	0.00268491	9.4939e-25	2.27854e-23	[-1]	Group25	11.8812	12	Specific for Cluster #1	[RPL12, RPL13, RPL7, RPL9, RPS11, RPS12, RPS20, RPS24, RPS27A]	[RPL22, RPL4, RPS18]	75	25	[RPL12, RPL13, RPL22, RPL4, RPL7, RPL9, RPS11, RPS12, RPS18, RPS20, RPS24, RPS27A]
R-HSA:195253	Degradation of beta-catenin by the destruction complex	REACTOME_Pathways_20.11.2017	5.44287e-16	2.97725e-13	9.4939e-25	2.27854e-23	[-1]	Group25	25.6098	21	None Specific Cluster	[PSMB3, PSMB6, PSMC2, PSMD13, PSMD2, PSMD4, PSME1, RPS27A, UBB]	[PSMA1, PSMA2, PSMA3, PSMA4, PSMA5, PSMA6, PSMA8, PSMB1, PSMB2, PSMB4, PSME2, UBC]	42.8571	57.1429	[PSMA1, PSMA2, PSMA3, PSMA4, PSMA5, PSMA6, PSMA8, PSMB1, PSMB2, PSMB3, PSMB4, PSMB6, PSMC2, PSMD13, PSMD2, PSMD4, PSME1, PSME2, RPS27A, UBB, UBC]
R-HSA:195721	Signaling by WNT	REACTOME_Pathways_20.11.2017	1.05958e-11	5.0542e-09	9.4939e-25	2.27854e-23	[-1]	Group25	10	33	None Specific Cluster	[AGO1, AGO3, AP2S1, CLTA, GNB3, PSMB3, PSMB6, PSMC2, PSMD13, PSMD2, PSMD4, PSME1, RPS27A, UBB, WLS]	[AGO2, CALM1, CLTC, HIST1H4K, HIST2H3D, PSMA1, PSMA2, PSMA3, PSMA4, PSMA5, PSMA6, PSMA8, PSMB1, PSMB2, PSMB4, PSME2, UBC, YWHAZ]	45.4545	54.5455	[AGO1, AGO2, AGO3, AP2S1, CALM1, CLTA, CLTC, GNB3, HIST1H4K, HIST2H3D, PSMA1, PSMA2, PSMA3, PSMA4, PSMA5, PSMA6, PSMA8, PSMB1, PSMB2, PSMB3, PSMB4, PSMB6, PSMC2, PSMD13, PSMD2, PSMD4, PSME1, PSME2, RPS27A, UBB, UBC, WLS, YWHAZ]
R-HSA:201681	TCF dependent signaling in response to WNT	REACTOME_Pathways_20.11.2017	4.11944e-09	1.76724e-06	9.4939e-25	2.27854e-23	[-1]	Group25	10.3004	24	Specific for Cluster #2	[PSMB3, PSMB6, PSMC2, PSMD13, PSMD2, PSMD4, PSME1, RPS27A, UBB]	[HIST1H4K, HIST2H3D, PSMA1, PSMA2, PSMA3, PSMA4, PSMA5, PSMA6, PSMA8, PSMB1, PSMB2, PSMB4, PSME2, UBC, YWHAZ]	37.5	62.5	[HIST1H4K, HIST2H3D, PSMA1, PSMA2, PSMA3, PSMA4, PSMA5, PSMA6, PSMA8, PSMB1, PSMB2, PSMB3, PSMB4, PSMB6, PSMC2, PSMD13, PSMD2, PSMD4, PSME1, PSME2, RPS27A, UBB, UBC, YWHAZ]
R-HSA:202403	TCR signaling	REACTOME_Pathways_20.11.2017	1.59135e-13	8.06817e-11	9.4939e-25	2.27854e-23	[-1]	Group25	18.4874	22	None Specific Cluster	[PSMB3, PSMB6, PSMC2, PSMD13, PSMD2, PSMD4, PSME1, RPS27A, UBB, UBE2V1]	[PSMA1, PSMA2, PSMA3, PSMA4, PSMA5, PSMA6, PSMA8, PSMB1, PSMB2, PSMB4, PSME2, UBC]	45.4545	54.5455	[PSMA1, PSMA2, PSMA3, PSMA4, PSMA5, PSMA6, PSMA8, PSMB1, PSMB2, PSMB3, PSMB4, PSMB6, PSMC2, PSMD13, PSMD2, PSMD4, PSME1, PSME2, RPS27A, UBB, UBC, UBE2V1]
R-HSA:202424	Downstream TCR signaling	REACTOME_Pathways_20.11.2017	2.21791e-15	1.18436e-12	9.4939e-25	2.27854e-23	[-1]	Group25	22.449	22	None Specific Cluster	[PSMB3, PSMB6, PSMC2, PSMD13, PSMD2, PSMD4, PSME1, RPS27A, UBB, UBE2V1]	[PSMA1, PSMA2, PSMA3, PSMA4, PSMA5, PSMA6, PSMA8, PSMB1, PSMB2, PSMB4, PSME2, UBC]	45.4545	54.5455	[PSMA1, PSMA2, PSMA3, PSMA4, PSMA5, PSMA6, PSMA8, PSMB1, PSMB2, PSMB3, PSMB4, PSMB6, PSMC2, PSMD13, PSMD2, PSMD4, PSME1, PSME2, RPS27A, UBB, UBC, UBE2V1]
R-HSA:211733	Regulation of activated PAK-2p34 by proteasome mediated degradation	REACTOME_Pathways_20.11.2017	4.15164e-21	2.52005e-18	9.4939e-25	2.27854e-23	[-1]	Group25	42	21	None Specific Cluster	[PSMB3, PSMB6, PSMC2, PSMD13, PSMD2, PSMD4, PSME1, RPS27A, UBB]	[PSMA1, PSMA2, PSMA3, PSMA4, PSMA5, PSMA6, PSMA8, PSMB1, PSMB2, PSMB4, PSME2, UBC]	42.8571	57.1429	[PSMA1, PSMA2, PSMA3, PSMA4, PSMA5, PSMA6, PSMA8, PSMB1, PSMB2, PSMB3, PSMB4, PSMB6, PSMC2, PSMD13, PSMD2, PSMD4, PSME1, PSME2, RPS27A, UBB, UBC]
R-HSA:2262749	Cellular response to hypoxia	REACTOME_Pathways_20.11.2017	4.35327e-18	2.52489e-15	9.4939e-25	2.27854e-23	[-1]	Group25	29.3333	22	None Specific Cluster	[PSMB3, PSMB6, PSMC2, PSMD13, PSMD2, PSMD4, PSME1, RPS27A, UBB]	[HIF3A, PSMA1, PSMA2, PSMA3, PSMA4, PSMA5, PSMA6, PSMA8, PSMB1, PSMB2, PSMB4, PSME2, UBC]	40.9091	59.0909	[HIF3A, PSMA1, PSMA2, PSMA3, PSMA4, PSMA5, PSMA6, PSMA8, PSMB1, PSMB2, PSMB3, PSMB4, PSMB6, PSMC2, PSMD13, PSMD2, PSMD4, PSME1, PSME2, RPS27A, UBB, UBC]
R-HSA:2262752	Cellular responses to stress	REACTOME_Pathways_20.11.2017	6.43335e-20	3.84714e-17	9.4939e-25	2.27854e-23	[-1]	Group25	11.6009	50	None Specific Cluster	[AGO1, AGO3, CAT, CCNE1, DYNC1H1, GPX2, HSPA1A, HSPA2, HSPA4, HSPA9, P4HB, PRDX1, PRDX3, PRDX6, PSMB3, PSMB6, PSMC2, PSMD13, PSMD2, PSMD4, PSME1, RPS27A, TNIK, UBB]	[CAPZB, GPX1, HIF3A, HIST1H4K, HIST2H3D, HSPA1L, HSPA5, HSPA6, HSPA8, NUP210, PSMA1, PSMA2, PSMA3, PSMA4, PSMA5, PSMA6, PSMA8, PSMB1, PSMB2, PSMB4, PSME2, SOD1, TXN, UBC, VCP, YWHAE]	48	52	[AGO1, AGO3, CAPZB, CAT, CCNE1, DYNC1H1, GPX1, GPX2, HIF3A, HIST1H4K, HIST2H3D, HSPA1A, HSPA1L, HSPA2, HSPA4, HSPA5, HSPA6, HSPA8, HSPA9, NUP210, P4HB, PRDX1, PRDX3, PRDX6, PSMA1, PSMA2, PSMA3, PSMA4, PSMA5, PSMA6, PSMA8, PSMB1, PSMB2, PSMB3, PSMB4, PSMB6, PSMC2, PSMD13, PSMD2, PSMD4, PSME1, PSME2, RPS27A, SOD1, TNIK, TXN, UBB, UBC, VCP, YWHAE]
R-HSA:2408522	Selenoamino acid metabolism	REACTOME_Pathways_20.11.2017	2.54852e-07	0.000100157	9.4939e-25	2.27854e-23	[-1]	Group25	12.605	15	Specific for Cluster #1	[LARS, QARS, RARS, RPL12, RPL13, RPL7, RPL9, RPS11, RPS12, RPS20, RPS24, RPS27A]	[RPL22, RPL4, RPS18]	80	20	[LARS, QARS, RARS, RPL12, RPL13, RPL22, RPL4, RPL7, RPL9, RPS11, RPS12, RPS18, RPS20, RPS24, RPS27A]
R-HSA:2408557	Selenocysteine synthesis	REACTOME_Pathways_20.11.2017	3.53262e-06	0.0013106	9.4939e-25	2.27854e-23	[-1]	Group25	12.766	12	Specific for Cluster #1	[RPL12, RPL13, RPL7, RPL9, RPS11, RPS12, RPS20, RPS24, RPS27A]	[RPL22, RPL4, RPS18]	75	25	[RPL12, RPL13, RPL22, RPL4, RPL7, RPL9, RPS11, RPS12, RPS18, RPS20, RPS24, RPS27A]
R-HSA:2454202	Fc epsilon receptor (FCERI) signaling	REACTOME_Pathways_20.11.2017	2.31421e-13	1.16867e-10	9.4939e-25	2.27854e-23	[-1]	Group25	17.1642	23	None Specific Cluster	[PSMB3, PSMB6, PSMC2, PSMD13, PSMD2, PSMD4, PSME1, RPS27A, UBB, UBE2V1]	[CALM1, PSMA1, PSMA2, PSMA3, PSMA4, PSMA5, PSMA6, PSMA8, PSMB1, PSMB2, PSMB4, PSME2, UBC]	43.4783	56.5217	[CALM1, PSMA1, PSMA2, PSMA3, PSMA4, PSMA5, PSMA6, PSMA8, PSMB1, PSMB2, PSMB3, PSMB4, PSMB6, PSMC2, PSMD13, PSMD2, PSMD4, PSME1, PSME2, RPS27A, UBB, UBC, UBE2V1]
R-HSA:2467813	Separation of Sister Chromatids	REACTOME_Pathways_20.11.2017	6.87789e-11	3.19822e-08	9.4939e-25	2.27854e-23	[-1]	Group25	12.5654	24	None Specific Cluster	[CLIP1, DYNC1H1, PAFAH1B1, PSMB3, PSMB6, PSMC2, PSMD13, PSMD2, PSMD4, PSME1, RPS27A, UBB]	[PSMA1, PSMA2, PSMA3, PSMA4, PSMA5, PSMA6, PSMA8, PSMB1, PSMB2, PSMB4, PSME2, UBC]	50	50	[CLIP1, DYNC1H1, PAFAH1B1, PSMA1, PSMA2, PSMA3, PSMA4, PSMA5, PSMA6, PSMA8, PSMB1, PSMB2, PSMB3, PSMB4, PSMB6, PSMC2, PSMD13, PSMD2, PSMD4, PSME1, PSME2, RPS27A, UBB, UBC]
R-HSA:2555396	Mitotic Metaphase and Anaphase	REACTOME_Pathways_20.11.2017	7.02209e-12	3.3706e-09	9.4939e-25	2.27854e-23	[-1]	Group25	12.8079	26	None Specific Cluster	[CLIP1, DYNC1H1, LMNA, PAFAH1B1, PSMB3, PSMB6, PSMC2, PSMD13, PSMD2, PSMD4, PSME1, RPS27A, UBB]	[BANF1, PSMA1, PSMA2, PSMA3, PSMA4, PSMA5, PSMA6, PSMA8, PSMB1, PSMB2, PSMB4, PSME2, UBC]	50	50	[BANF1, CLIP1, DYNC1H1, LMNA, PAFAH1B1, PSMA1, PSMA2, PSMA3, PSMA4, PSMA5, PSMA6, PSMA8, PSMB1, PSMB2, PSMB3, PSMB4, PSMB6, PSMC2, PSMD13, PSMD2, PSMD4, PSME1, PSME2, RPS27A, UBB, UBC]
R-HSA:2871837	FCERI mediated NF-kB activation	REACTOME_Pathways_20.11.2017	3.65217e-17	2.06713e-14	9.4939e-25	2.27854e-23	[-1]	Group25	26.8293	22	None Specific Cluster	[PSMB3, PSMB6, PSMC2, PSMD13, PSMD2, PSMD4, PSME1, RPS27A, UBB, UBE2V1]	[PSMA1, PSMA2, PSMA3, PSMA4, PSMA5, PSMA6, PSMA8, PSMB1, PSMB2, PSMB4, PSME2, UBC]	45.4545	54.5455	[PSMA1, PSMA2, PSMA3, PSMA4, PSMA5, PSMA6, PSMA8, PSMB1, PSMB2, PSMB3, PSMB4, PSMB6, PSMC2, PSMD13, PSMD2, PSMD4, PSME1, PSME2, RPS27A, UBB, UBC, UBE2V1]
R-HSA:349425	Autodegradation of the E3 ubiquitin ligase COP1	REACTOME_Pathways_20.11.2017	1.13103e-20	6.82012e-18	9.4939e-25	2.27854e-23	[-1]	Group25	40.3846	21	None Specific Cluster	[PSMB3, PSMB6, PSMC2, PSMD13, PSMD2, PSMD4, PSME1, RPS27A, UBB]	[PSMA1, PSMA2, PSMA3, PSMA4, PSMA5, PSMA6, PSMA8, PSMB1, PSMB2, PSMB4, PSME2, UBC]	42.8571	57.1429	[PSMA1, PSMA2, PSMA3, PSMA4, PSMA5, PSMA6, PSMA8, PSMB1, PSMB2, PSMB3, PSMB4, PSMB6, PSMC2, PSMD13, PSMD2, PSMD4, PSME1, PSME2, RPS27A, UBB, UBC]
R-HSA:350562	Regulation of ornithine decarboxylase (ODC)	REACTOME_Pathways_20.11.2017	1.17166e-16	6.52612e-14	9.4939e-25	2.27854e-23	[-1]	Group25	35.2941	18	Specific for Cluster #2	[PSMB3, PSMB6, PSMC2, PSMD13, PSMD2, PSMD4, PSME1]	[PSMA1, PSMA2, PSMA3, PSMA4, PSMA5, PSMA6, PSMA8, PSMB1, PSMB2, PSMB4, PSME2]	38.8889	61.1111	[PSMA1, PSMA2, PSMA3, PSMA4, PSMA5, PSMA6, PSMA8, PSMB1, PSMB2, PSMB3, PSMB4, PSMB6, PSMC2, PSMD13, PSMD2, PSMD4, PSME1, PSME2]
R-HSA:351202	Metabolism of polyamines	REACTOME_Pathways_20.11.2017	2.51247e-13	1.26126e-10	9.4939e-25	2.27854e-23	[-1]	Group25	22.093	19	Specific for Cluster #2	[PSMB3, PSMB6, PSMC2, PSMD13, PSMD2, PSMD4, PSME1]	[MTAP, PSMA1, PSMA2, PSMA3, PSMA4, PSMA5, PSMA6, PSMA8, PSMB1, PSMB2, PSMB4, PSME2]	36.8421	63.1579	[MTAP, PSMA1, PSMA2, PSMA3, PSMA4, PSMA5, PSMA6, PSMA8, PSMB1, PSMB2, PSMB3, PSMB4, PSMB6, PSMC2, PSMD13, PSMD2, PSMD4, PSME1, PSME2]
R-HSA:376176	Signaling by ROBO receptors	REACTOME_Pathways_20.11.2017	9.39766e-18	5.39425e-15	9.4939e-25	2.27854e-23	[-1]	Group25	15.5251	34	None Specific Cluster	[NCBP1, PSMB3, PSMB6, PSMC2, PSMD13, PSMD2, PSMD4, PSME1, RBM8A, RPL12, RPL13, RPL7, RPL9, RPS11, RPS12, RPS20, RPS24, RPS27A, UBB]	[PSMA1, PSMA2, PSMA3, PSMA4, PSMA5, PSMA6, PSMA8, PSMB1, PSMB2, PSMB4, PSME2, RPL22, RPL4, RPS18, UBC]	55.8824	44.1176	[NCBP1, PSMA1, PSMA2, PSMA3, PSMA4, PSMA5, PSMA6, PSMA8, PSMB1, PSMB2, PSMB3, PSMB4, PSMB6, PSMC2, PSMD13, PSMD2, PSMD4, PSME1, PSME2, RBM8A, RPL12, RPL13, RPL22, RPL4, RPL7, RPL9, RPS11, RPS12, RPS18, RPS20, RPS24, RPS27A, UBB, UBC]
R-HSA:382551	Transport of small molecules	REACTOME_Pathways_20.11.2017	1.74537e-11	8.22071e-09	9.4939e-25	2.27854e-23	[-1]	Group25	7.0442	51	None Specific Cluster	[ADD2, AP2S1, AQP1, ATP1B1, ATP6V1A, ATP8B2, CA2, CLTA, DMTN, EIF2S1, EIF2S2, FKBP1B, GNB3, MICU1, P4HB, PHB2, PSMB3, PSMB6, PSMC2, PSMD13, PSMD2, PSMD4, PSME1, RAB11A, RHAG, RPS27A, UBB, VDAC1, VDAC2]	[ABCC4, ACO1, ATP1A3, ATP6V1B2, CALM1, CLTC, FTH1, PSMA1, PSMA2, PSMA3, PSMA4, PSMA5, PSMA6, PSMA8, PSMB1, PSMB2, PSMB4, PSME2, SLC4A8, TF, UBC, VCP]	56.8627	43.1373	[ABCC4, ACO1, ADD2, AP2S1, AQP1, ATP1A3, ATP1B1, ATP6V1A, ATP6V1B2, ATP8B2, CA2, CALM1, CLTA, CLTC, DMTN, EIF2S1, EIF2S2, FKBP1B, FTH1, GNB3, MICU1, P4HB, PHB2, PSMA1, PSMA2, PSMA3, PSMA4, PSMA5, PSMA6, PSMA8, PSMB1, PSMB2, PSMB3, PSMB4, PSMB6, PSMC2, PSMD13, PSMD2, PSMD4, PSME1, PSME2, RAB11A, RHAG, RPS27A, SLC4A8, TF, UBB, UBC, VCP, VDAC1, VDAC2]
R-HSA:382556	ABC-family proteins mediated transport	REACTOME_Pathways_20.11.2017	4.51899e-18	2.6165e-15	9.4939e-25	2.27854e-23	[-1]	Group25	24.0385	25	None Specific Cluster	[EIF2S1, EIF2S2, PSMB3, PSMB6, PSMC2, PSMD13, PSMD2, PSMD4, PSME1, RPS27A, UBB]	[ABCC4, PSMA1, PSMA2, PSMA3, PSMA4, PSMA5, PSMA6, PSMA8, PSMB1, PSMB2, PSMB4, PSME2, UBC, VCP]	44	56	[ABCC4, EIF2S1, EIF2S2, PSMA1, PSMA2, PSMA3, PSMA4, PSMA5, PSMA6, PSMA8, PSMB1, PSMB2, PSMB3, PSMB4, PSMB6, PSMC2, PSMD13, PSMD2, PSMD4, PSME1, PSME2, RPS27A, UBB, UBC, VCP]
R-HSA:3858494	Beta-catenin independent WNT signaling	REACTOME_Pathways_20.11.2017	2.1062e-18	1.23002e-15	9.4939e-25	2.27854e-23	[-1]	Group25	20	29	None Specific Cluster	[AGO1, AGO3, AP2S1, CLTA, GNB3, PSMB3, PSMB6, PSMC2, PSMD13, PSMD2, PSMD4, PSME1, RPS27A, UBB]	[AGO2, CALM1, CLTC, PSMA1, PSMA2, PSMA3, PSMA4, PSMA5, PSMA6, PSMA8, PSMB1, PSMB2, PSMB4, PSME2, UBC]	48.2759	51.7241	[AGO1, AGO2, AGO3, AP2S1, CALM1, CLTA, CLTC, GNB3, PSMA1, PSMA2, PSMA3, PSMA4, PSMA5, PSMA6, PSMA8, PSMB1, PSMB2, PSMB3, PSMB4, PSMB6, PSMC2, PSMD13, PSMD2, PSMD4, PSME1, PSME2, RPS27A, UBB, UBC]
R-HSA:4086400	PCP/CE pathway	REACTOME_Pathways_20.11.2017	2.69087e-18	1.56878e-15	9.4939e-25	2.27854e-23	[-1]	Group25	26.087	24	None Specific Cluster	[AP2S1, CLTA, PSMB3, PSMB6, PSMC2, PSMD13, PSMD2, PSMD4, PSME1, RPS27A, UBB]	[CLTC, PSMA1, PSMA2, PSMA3, PSMA4, PSMA5, PSMA6, PSMA8, PSMB1, PSMB2, PSMB4, PSME2, UBC]	45.8333	54.1667	[AP2S1, CLTA, CLTC, PSMA1, PSMA2, PSMA3, PSMA4, PSMA5, PSMA6, PSMA8, PSMB1, PSMB2, PSMB3, PSMB4, PSMB6, PSMC2, PSMD13, PSMD2, PSMD4, PSME1, PSME2, RPS27A, UBB, UBC]
R-HSA:422475	Axon guidance	REACTOME_Pathways_20.11.2017	1.70833e-16	9.46412e-14	9.4939e-25	2.27854e-23	[-1]	Group25	9.30233	52	None Specific Cluster	[ACTG1, AP2S1, CLTA, DNM1, DNM2, EZR, LIMK2, MYH10, MYH9, NCBP1, PSMB3, PSMB6, PSMC2, PSMD13, PSMD2, PSMD4, PSME1, PTK2, RBM8A, RPL12, RPL13, RPL7, RPL9, RPS11, RPS12, RPS20, RPS24, RPS27A, SPTAN1, SPTBN4, UBB]	[ACTB, AGRN, CLTC, HSPA8, MSN, PSMA1, PSMA2, PSMA3, PSMA4, PSMA5, PSMA6, PSMA8, PSMB1, PSMB2, PSMB4, PSME2, RDX, RPL22, RPL4, RPS18, UBC]	59.6154	40.3846	[ACTB, ACTG1, AGRN, AP2S1, CLTA, CLTC, DNM1, DNM2, EZR, HSPA8, LIMK2, MSN, MYH10, MYH9, NCBP1, PSMA1, PSMA2, PSMA3, PSMA4, PSMA5, PSMA6, PSMA8, PSMB1, PSMB2, PSMB3, PSMB4, PSMB6, PSMC2, PSMD13, PSMD2, PSMD4, PSME1, PSME2, PTK2, RBM8A, RDX, RPL12, RPL13, RPL22, RPL4, RPL7, RPL9, RPS11, RPS12, RPS18, RPS20, RPS24, RPS27A, SPTAN1, SPTBN4, UBB, UBC]
R-HSA:446652	Interleukin-1 family signaling	REACTOME_Pathways_20.11.2017	3.42534e-14	1.77433e-11	9.4939e-25	2.27854e-23	[-1]	Group25	18.6992	23	None Specific Cluster	[PSMB3, PSMB6, PSMC2, PSMD13, PSMD2, PSMD4, PSME1, RPS27A, SQSTM1, UBB, UBE2V1]	[PSMA1, PSMA2, PSMA3, PSMA4, PSMA5, PSMA6, PSMA8, PSMB1, PSMB2, PSMB4, PSME2, UBC]	47.8261	52.1739	[PSMA1, PSMA2, PSMA3, PSMA4, PSMA5, PSMA6, PSMA8, PSMB1, PSMB2, PSMB3, PSMB4, PSMB6, PSMC2, PSMD13, PSMD2, PSMD4, PSME1, PSME2, RPS27A, SQSTM1, UBB, UBC, UBE2V1]
R-HSA:450408	AUF1 (hnRNP D0) binds and destabilizes mRNA	REACTOME_Pathways_20.11.2017	9.95144e-23	6.13008e-20	9.4939e-25	2.27854e-23	[-1]	Group25	41.0714	23	None Specific Cluster	[HSPA1A, PSMB3, PSMB6, PSMC2, PSMD13, PSMD2, PSMD4, PSME1, RPS27A, UBB]	[HSPA8, PSMA1, PSMA2, PSMA3, PSMA4, PSMA5, PSMA6, PSMA8, PSMB1, PSMB2, PSMB4, PSME2, UBC]	43.4783	56.5217	[HSPA1A, HSPA8, PSMA1, PSMA2, PSMA3, PSMA4, PSMA5, PSMA6, PSMA8, PSMB1, PSMB2, PSMB3, PSMB4, PSMB6, PSMC2, PSMD13, PSMD2, PSMD4, PSME1, PSME2, RPS27A, UBB, UBC]
R-HSA:450531	Regulation of mRNA stability by proteins that bind AU-rich elements	REACTOME_Pathways_20.11.2017	3.07654e-21	1.87361e-18	9.4939e-25	2.27854e-23	[-1]	Group25	29.5455	26	None Specific Cluster	[HSPA1A, KHSRP, PSMB3, PSMB6, PSMC2, PSMD13, PSMD2, PSMD4, PSME1, RPS27A, UBB, YWHAB]	[HSPA8, PSMA1, PSMA2, PSMA3, PSMA4, PSMA5, PSMA6, PSMA8, PSMB1, PSMB2, PSMB4, PSME2, UBC, YWHAZ]	46.1538	53.8462	[HSPA1A, HSPA8, KHSRP, PSMA1, PSMA2, PSMA3, PSMA4, PSMA5, PSMA6, PSMA8, PSMB1, PSMB2, PSMB3, PSMB4, PSMB6, PSMC2, PSMD13, PSMD2, PSMD4, PSME1, PSME2, RPS27A, UBB, UBC, YWHAB, YWHAZ]
R-HSA:453274	Mitotic G2-G2/M phases	REACTOME_Pathways_20.11.2017	3.93775e-12	1.90193e-09	9.4939e-25	2.27854e-23	[-1]	Group25	13.1313	26	None Specific Cluster	[DYNC1H1, PAFAH1B1, PSMB3, PSMB6, PSMC2, PSMD13, PSMD2, PSMD4, PSME1, RAB8A, RPS27A, UBB]	[PSMA1, PSMA2, PSMA3, PSMA4, PSMA5, PSMA6, PSMA8, PSMB1, PSMB2, PSMB4, PSME2, UBC, YWHAE, YWHAG]	46.1538	53.8462	[DYNC1H1, PAFAH1B1, PSMA1, PSMA2, PSMA3, PSMA4, PSMA5, PSMA6, PSMA8, PSMB1, PSMB2, PSMB3, PSMB4, PSMB6, PSMC2, PSMD13, PSMD2, PSMD4, PSME1, PSME2, RAB8A, RPS27A, UBB, UBC, YWHAE, YWHAG]
R-HSA:453276	Regulation of mitotic cell cycle	REACTOME_Pathways_20.11.2017	1.55813e-15	8.36718e-13	9.4939e-25	2.27854e-23	[-1]	Group25	24.4186	21	None Specific Cluster	[PSMB3, PSMB6, PSMC2, PSMD13, PSMD2, PSMD4, PSME1, RPS27A, UBB]	[PSMA1, PSMA2, PSMA3, PSMA4, PSMA5, PSMA6, PSMA8, PSMB1, PSMB2, PSMB4, PSME2, UBC]	42.8571	57.1429	[PSMA1, PSMA2, PSMA3, PSMA4, PSMA5, PSMA6, PSMA8, PSMB1, PSMB2, PSMB3, PSMB4, PSMB6, PSMC2, PSMD13, PSMD2, PSMD4, PSME1, PSME2, RPS27A, UBB, UBC]
R-HSA:453279	Mitotic G1-G1/S phases	REACTOME_Pathways_20.11.2017	1.32904e-11	6.28635e-09	9.4939e-25	2.27854e-23	[-1]	Group25	14.966	22	None Specific Cluster	[CCNE1, PSMB3, PSMB6, PSMC2, PSMD13, PSMD2, PSMD4, PSME1, RPS27A, UBB]	[PRIM2, PSMA1, PSMA2, PSMA3, PSMA4, PSMA5, PSMA6, PSMB1, PSMB2, PSMB4, PSME2, UBC]	45.4545	54.5455	[CCNE1, PRIM2, PSMA1, PSMA2, PSMA3, PSMA4, PSMA5, PSMA6, PSMB1, PSMB2, PSMB3, PSMB4, PSMB6, PSMC2, PSMD13, PSMD2, PSMD4, PSME1, PSME2, RPS27A, UBB, UBC]
R-HSA:4608870	Asymmetric localization of PCP proteins	REACTOME_Pathways_20.11.2017	1.84121e-18	1.07895e-15	9.4939e-25	2.27854e-23	[-1]	Group25	32.8125	21	None Specific Cluster	[PSMB3, PSMB6, PSMC2, PSMD13, PSMD2, PSMD4, PSME1, RPS27A, UBB]	[PSMA1, PSMA2, PSMA3, PSMA4, PSMA5, PSMA6, PSMA8, PSMB1, PSMB2, PSMB4, PSME2, UBC]	42.8571	57.1429	[PSMA1, PSMA2, PSMA3, PSMA4, PSMA5, PSMA6, PSMA8, PSMB1, PSMB2, PSMB3, PSMB4, PSMB6, PSMC2, PSMD13, PSMD2, PSMD4, PSME1, PSME2, RPS27A, UBB, UBC]
R-HSA:4641257	Degradation of AXIN	REACTOME_Pathways_20.11.2017	4.63031e-20	2.77356e-17	9.4939e-25	2.27854e-23	[-1]	Group25	38.1818	21	None Specific Cluster	[PSMB3, PSMB6, PSMC2, PSMD13, PSMD2, PSMD4, PSME1, RPS27A, UBB]	[PSMA1, PSMA2, PSMA3, PSMA4, PSMA5, PSMA6, PSMA8, PSMB1, PSMB2, PSMB4, PSME2, UBC]	42.8571	57.1429	[PSMA1, PSMA2, PSMA3, PSMA4, PSMA5, PSMA6, PSMA8, PSMB1, PSMB2, PSMB3, PSMB4, PSMB6, PSMC2, PSMD13, PSMD2, PSMD4, PSME1, PSME2, RPS27A, UBB, UBC]
R-HSA:4641258	Degradation of DVL	REACTOME_Pathways_20.11.2017	1.12064e-19	6.67903e-17	9.4939e-25	2.27854e-23	[-1]	Group25	36.8421	21	None Specific Cluster	[PSMB3, PSMB6, PSMC2, PSMD13, PSMD2, PSMD4, PSME1, RPS27A, UBB]	[PSMA1, PSMA2, PSMA3, PSMA4, PSMA5, PSMA6, PSMA8, PSMB1, PSMB2, PSMB4, PSME2, UBC]	42.8571	57.1429	[PSMA1, PSMA2, PSMA3, PSMA4, PSMA5, PSMA6, PSMA8, PSMB1, PSMB2, PSMB3, PSMB4, PSMB6, PSMC2, PSMD13, PSMD2, PSMD4, PSME1, PSME2, RPS27A, UBB, UBC]
R-HSA:5357801	Programmed Cell Death	REACTOME_Pathways_20.11.2017	5.91604e-19	3.48455e-16	9.4939e-25	2.27854e-23	[-1]	Group25	18.2857	32	None Specific Cluster	[CASP8, DBNL, LMNA, PSMB3, PSMB6, PSMC2, PSMD13, PSMD2, PSMD4, PSME1, PTK2, RPS27A, SPTAN1, UBB, YWHAB]	[FADD, PSMA1, PSMA2, PSMA3, PSMA4, PSMA5, PSMA6, PSMA8, PSMB1, PSMB2, PSMB4, PSME2, UBC, YWHAE, YWHAG, YWHAQ, YWHAZ]	46.875	53.125	[CASP8, DBNL, FADD, LMNA, PSMA1, PSMA2, PSMA3, PSMA4, PSMA5, PSMA6, PSMA8, PSMB1, PSMB2, PSMB3, PSMB4, PSMB6, PSMC2, PSMD13, PSMD2, PSMD4, PSME1, PSME2, PTK2, RPS27A, SPTAN1, UBB, UBC, YWHAB, YWHAE, YWHAG, YWHAQ, YWHAZ]
R-HSA:5358346	Hedgehog ligand biogenesis	REACTOME_Pathways_20.11.2017	5.80931e-21	3.52044e-18	9.4939e-25	2.27854e-23	[-1]	Group25	35.3846	23	None Specific Cluster	[P4HB, PSMB3, PSMB6, PSMC2, PSMD13, PSMD2, PSMD4, PSME1, RPS27A, UBB]	[PSMA1, PSMA2, PSMA3, PSMA4, PSMA5, PSMA6, PSMA8, PSMB1, PSMB2, PSMB4, PSME2, UBC, VCP]	43.4783	56.5217	[P4HB, PSMA1, PSMA2, PSMA3, PSMA4, PSMA5, PSMA6, PSMA8, PSMB1, PSMB2, PSMB3, PSMB4, PSMB6, PSMC2, PSMD13, PSMD2, PSMD4, PSME1, PSME2, RPS27A, UBB, UBC, VCP]
R-HSA:5358351	Signaling by Hedgehog	REACTOME_Pathways_20.11.2017	2.33347e-12	1.13873e-09	9.4939e-25	2.27854e-23	[-1]	Group25	15.4362	23	None Specific Cluster	[P4HB, PSMB3, PSMB6, PSMC2, PSMD13, PSMD2, PSMD4, PSME1, RPS27A, UBB]	[PSMA1, PSMA2, PSMA3, PSMA4, PSMA5, PSMA6, PSMA8, PSMB1, PSMB2, PSMB4, PSME2, UBC, VCP]	43.4783	56.5217	[P4HB, PSMA1, PSMA2, PSMA3, PSMA4, PSMA5, PSMA6, PSMA8, PSMB1, PSMB2, PSMB3, PSMB4, PSMB6, PSMC2, PSMD13, PSMD2, PSMD4, PSME1, PSME2, RPS27A, UBB, UBC, VCP]
R-HSA:5362768	Hh mutants that don't undergo autocatalytic processing are degraded by ERAD	REACTOME_Pathways_20.11.2017	2.78783e-21	1.70058e-18	9.4939e-25	2.27854e-23	[-1]	Group25	39.2857	22	None Specific Cluster	[PSMB3, PSMB6, PSMC2, PSMD13, PSMD2, PSMD4, PSME1, RPS27A, UBB]	[PSMA1, PSMA2, PSMA3, PSMA4, PSMA5, PSMA6, PSMA8, PSMB1, PSMB2, PSMB4, PSME2, UBC, VCP]	40.9091	59.0909	[PSMA1, PSMA2, PSMA3, PSMA4, PSMA5, PSMA6, PSMA8, PSMB1, PSMB2, PSMB3, PSMB4, PSMB6, PSMC2, PSMD13, PSMD2, PSMD4, PSME1, PSME2, RPS27A, UBB, UBC, VCP]
R-HSA:5387390	Hh mutants abrogate ligand secretion	REACTOME_Pathways_20.11.2017	1.08917e-20	6.57862e-18	9.4939e-25	2.27854e-23	[-1]	Group25	37.2881	22	None Specific Cluster	[PSMB3, PSMB6, PSMC2, PSMD13, PSMD2, PSMD4, PSME1, RPS27A, UBB]	[PSMA1, PSMA2, PSMA3, PSMA4, PSMA5, PSMA6, PSMA8, PSMB1, PSMB2, PSMB4, PSME2, UBC, VCP]	40.9091	59.0909	[PSMA1, PSMA2, PSMA3, PSMA4, PSMA5, PSMA6, PSMA8, PSMB1, PSMB2, PSMB3, PSMB4, PSMB6, PSMC2, PSMD13, PSMD2, PSMD4, PSME1, PSME2, RPS27A, UBB, UBC, VCP]
R-HSA:5607761	Dectin-1 mediated noncanonical NF-kB signaling	REACTOME_Pathways_20.11.2017	3.91827e-19	2.31962e-16	9.4939e-25	2.27854e-23	[-1]	Group25	35	21	None Specific Cluster	[PSMB3, PSMB6, PSMC2, PSMD13, PSMD2, PSMD4, PSME1, RPS27A, UBB]	[PSMA1, PSMA2, PSMA3, PSMA4, PSMA5, PSMA6, PSMA8, PSMB1, PSMB2, PSMB4, PSME2, UBC]	42.8571	57.1429	[PSMA1, PSMA2, PSMA3, PSMA4, PSMA5, PSMA6, PSMA8, PSMB1, PSMB2, PSMB3, PSMB4, PSMB6, PSMC2, PSMD13, PSMD2, PSMD4, PSME1, PSME2, RPS27A, UBB, UBC]
R-HSA:5607764	CLEC7A (Dectin-1) signaling	REACTOME_Pathways_20.11.2017	2.10143e-18	1.22933e-15	9.4939e-25	2.27854e-23	[-1]	Group25	24.7525	25	None Specific Cluster	[CASP8, PSMB3, PSMB6, PSMC2, PSMD13, PSMD2, PSMD4, PSME1, PYCARD, RPS27A, UBB, UBE2V1]	[CALM1, PSMA1, PSMA2, PSMA3, PSMA4, PSMA5, PSMA6, PSMA8, PSMB1, PSMB2, PSMB4, PSME2, UBC]	48	52	[CALM1, CASP8, PSMA1, PSMA2, PSMA3, PSMA4, PSMA5, PSMA6, PSMA8, PSMB1, PSMB2, PSMB3, PSMB4, PSMB6, PSMC2, PSMD13, PSMD2, PSMD4, PSME1, PSME2, PYCARD, RPS27A, UBB, UBC, UBE2V1]
R-HSA:5610780	Degradation of GLI1 by the proteasome	REACTOME_Pathways_20.11.2017	3.91827e-19	2.31962e-16	9.4939e-25	2.27854e-23	[-1]	Group25	35	21	None Specific Cluster	[PSMB3, PSMB6, PSMC2, PSMD13, PSMD2, PSMD4, PSME1, RPS27A, UBB]	[PSMA1, PSMA2, PSMA3, PSMA4, PSMA5, PSMA6, PSMA8, PSMB1, PSMB2, PSMB4, PSME2, UBC]	42.8571	57.1429	[PSMA1, PSMA2, PSMA3, PSMA4, PSMA5, PSMA6, PSMA8, PSMB1, PSMB2, PSMB3, PSMB4, PSMB6, PSMC2, PSMD13, PSMD2, PSMD4, PSME1, PSME2, RPS27A, UBB, UBC]
R-HSA:5610783	Degradation of GLI2 by the proteasome	REACTOME_Pathways_20.11.2017	3.91827e-19	2.31962e-16	9.4939e-25	2.27854e-23	[-1]	Group25	35	21	None Specific Cluster	[PSMB3, PSMB6, PSMC2, PSMD13, PSMD2, PSMD4, PSME1, RPS27A, UBB]	[PSMA1, PSMA2, PSMA3, PSMA4, PSMA5, PSMA6, PSMA8, PSMB1, PSMB2, PSMB4, PSME2, UBC]	42.8571	57.1429	[PSMA1, PSMA2, PSMA3, PSMA4, PSMA5, PSMA6, PSMA8, PSMB1, PSMB2, PSMB3, PSMB4, PSMB6, PSMC2, PSMD13, PSMD2, PSMD4, PSME1, PSME2, RPS27A, UBB, UBC]
R-HSA:5610785	GLI3 is processed to GLI3R by the proteasome	REACTOME_Pathways_20.11.2017	3.91827e-19	2.31962e-16	9.4939e-25	2.27854e-23	[-1]	Group25	35	21	None Specific Cluster	[PSMB3, PSMB6, PSMC2, PSMD13, PSMD2, PSMD4, PSME1, RPS27A, UBB]	[PSMA1, PSMA2, PSMA3, PSMA4, PSMA5, PSMA6, PSMA8, PSMB1, PSMB2, PSMB4, PSME2, UBC]	42.8571	57.1429	[PSMA1, PSMA2, PSMA3, PSMA4, PSMA5, PSMA6, PSMA8, PSMB1, PSMB2, PSMB3, PSMB4, PSMB6, PSMC2, PSMD13, PSMD2, PSMD4, PSME1, PSME2, RPS27A, UBB, UBC]
R-HSA:5610787	Hedgehog 'off' state	REACTOME_Pathways_20.11.2017	5.13602e-13	2.56288e-10	9.4939e-25	2.27854e-23	[-1]	Group25	18.5841	21	None Specific Cluster	[PSMB3, PSMB6, PSMC2, PSMD13, PSMD2, PSMD4, PSME1, RPS27A, UBB]	[PSMA1, PSMA2, PSMA3, PSMA4, PSMA5, PSMA6, PSMA8, PSMB1, PSMB2, PSMB4, PSME2, UBC]	42.8571	57.1429	[PSMA1, PSMA2, PSMA3, PSMA4, PSMA5, PSMA6, PSMA8, PSMB1, PSMB2, PSMB3, PSMB4, PSMB6, PSMC2, PSMD13, PSMD2, PSMD4, PSME1, PSME2, RPS27A, UBB, UBC]
R-HSA:5619084	ABC transporter disorders	REACTOME_Pathways_20.11.2017	2.73406e-17	1.55294e-14	9.4939e-25	2.27854e-23	[-1]	Group25	27.1605	22	None Specific Cluster	[PSMB3, PSMB6, PSMC2, PSMD13, PSMD2, PSMD4, PSME1, RPS27A, UBB]	[PSMA1, PSMA2, PSMA3, PSMA4, PSMA5, PSMA6, PSMA8, PSMB1, PSMB2, PSMB4, PSME2, UBC, VCP]	40.9091	59.0909	[PSMA1, PSMA2, PSMA3, PSMA4, PSMA5, PSMA6, PSMA8, PSMB1, PSMB2, PSMB3, PSMB4, PSMB6, PSMC2, PSMD13, PSMD2, PSMD4, PSME1, PSME2, RPS27A, UBB, UBC, VCP]
R-HSA:5619115	Disorders of transmembrane transporters	REACTOME_Pathways_20.11.2017	2.33347e-12	1.13873e-09	9.4939e-25	2.27854e-23	[-1]	Group25	15.4362	23	None Specific Cluster	[PSMB3, PSMB6, PSMC2, PSMD13, PSMD2, PSMD4, PSME1, RHAG, RPS27A, UBB]	[PSMA1, PSMA2, PSMA3, PSMA4, PSMA5, PSMA6, PSMA8, PSMB1, PSMB2, PSMB4, PSME2, UBC, VCP]	43.4783	56.5217	[PSMA1, PSMA2, PSMA3, PSMA4, PSMA5, PSMA6, PSMA8, PSMB1, PSMB2, PSMB3, PSMB4, PSMB6, PSMC2, PSMD13, PSMD2, PSMD4, PSME1, PSME2, RHAG, RPS27A, UBB, UBC, VCP]
R-HSA:5621481	C-type lectin receptors (CLRs)	REACTOME_Pathways_20.11.2017	1.44544e-15	7.77645e-13	9.4939e-25	2.27854e-23	[-1]	Group25	18.1818	26	None Specific Cluster	[CASP8, PSMB3, PSMB6, PSMC2, PSMD13, PSMD2, PSMD4, PSME1, PYCARD, RPS27A, UBB, UBE2V1]	[CALM1, CD209, PSMA1, PSMA2, PSMA3, PSMA4, PSMA5, PSMA6, PSMA8, PSMB1, PSMB2, PSMB4, PSME2, UBC]	46.1538	53.8462	[CALM1, CASP8, CD209, PSMA1, PSMA2, PSMA3, PSMA4, PSMA5, PSMA6, PSMA8, PSMB1, PSMB2, PSMB3, PSMB4, PSMB6, PSMC2, PSMD13, PSMD2, PSMD4, PSME1, PSME2, PYCARD, RPS27A, UBB, UBC, UBE2V1]
R-HSA:5632684	Hedgehog 'on' state	REACTOME_Pathways_20.11.2017	1.20486e-15	6.51831e-13	9.4939e-25	2.27854e-23	[-1]	Group25	24.7059	21	None Specific Cluster	[PSMB3, PSMB6, PSMC2, PSMD13, PSMD2, PSMD4, PSME1, RPS27A, UBB]	[PSMA1, PSMA2, PSMA3, PSMA4, PSMA5, PSMA6, PSMA8, PSMB1, PSMB2, PSMB4, PSME2, UBC]	42.8571	57.1429	[PSMA1, PSMA2, PSMA3, PSMA4, PSMA5, PSMA6, PSMA8, PSMB1, PSMB2, PSMB3, PSMB4, PSMB6, PSMC2, PSMD13, PSMD2, PSMD4, PSME1, PSME2, RPS27A, UBB, UBC]
R-HSA:5658442	Regulation of RAS by GAPs	REACTOME_Pathways_20.11.2017	7.67274e-18	4.42717e-15	9.4939e-25	2.27854e-23	[-1]	Group25	30.8824	21	None Specific Cluster	[PSMB3, PSMB6, PSMC2, PSMD13, PSMD2, PSMD4, PSME1, RPS27A, UBB]	[PSMA1, PSMA2, PSMA3, PSMA4, PSMA5, PSMA6, PSMA8, PSMB1, PSMB2, PSMB4, PSME2, UBC]	42.8571	57.1429	[PSMA1, PSMA2, PSMA3, PSMA4, PSMA5, PSMA6, PSMA8, PSMB1, PSMB2, PSMB3, PSMB4, PSMB6, PSMC2, PSMD13, PSMD2, PSMD4, PSME1, PSME2, RPS27A, UBB, UBC]
R-HSA:5663202	Diseases of signal transduction	REACTOME_Pathways_20.11.2017	1.88078e-08	7.86167e-06	9.4939e-25	2.27854e-23	[-1]	Group25	8	30	None Specific Cluster	[ACTG1, IQGAP1, LMNA, NCBP1, PSMB3, PSMB6, PSMC2, PSMD13, PSMD2, PSMD4, PSME1, RPS27A, TSC2, UBB, YWHAB]	[ACTB, JAG2, PSMA1, PSMA2, PSMA3, PSMA4, PSMA5, PSMA6, PSMA8, PSMB1, PSMB2, PSMB4, PSME2, UBC, VCP]	50	50	[ACTB, ACTG1, IQGAP1, JAG2, LMNA, NCBP1, PSMA1, PSMA2, PSMA3, PSMA4, PSMA5, PSMA6, PSMA8, PSMB1, PSMB2, PSMB3, PSMB4, PSMB6, PSMC2, PSMD13, PSMD2, PSMD4, PSME1, PSME2, RPS27A, TSC2, UBB, UBC, VCP, YWHAB]
R-HSA:5663205	Infectious disease	REACTOME_Pathways_20.11.2017	6.46736e-16	3.52471e-13	9.4939e-25	2.27854e-23	[-1]	Group25	10.2273	45	None Specific Cluster	[AP2S1, CLTA, EEF2, HSPA1A, KPNA4, NCBP1, PSMB3, PSMB6, PSMC2, PSMD13, PSMD2, PSMD4, PSME1, RANBP1, RPL12, RPL13, RPL7, RPL9, RPS11, RPS12, RPS20, RPS24, RPS27A, SSRP1, UBB]	[BANF1, CALM1, CLTC, NUP210, PSMA1, PSMA2, PSMA3, PSMA4, PSMA5, PSMA6, PSMA8, PSMB1, PSMB2, PSMB4, PSME2, RAN, RPL22, RPL4, RPS18, UBC]	55.5556	44.4444	[AP2S1, BANF1, CALM1, CLTA, CLTC, EEF2, HSPA1A, KPNA4, NCBP1, NUP210, PSMA1, PSMA2, PSMA3, PSMA4, PSMA5, PSMA6, PSMA8, PSMB1, PSMB2, PSMB3, PSMB4, PSMB6, PSMC2, PSMD13, PSMD2, PSMD4, PSME1, PSME2, RAN, RANBP1, RPL12, RPL13, RPL22, RPL4, RPL7, RPL9, RPS11, RPS12, RPS18, RPS20, RPS24, RPS27A, SSRP1, UBB, UBC]
R-HSA:5668541	TNFR2 non-canonical NF-kB pathway	REACTOME_Pathways_20.11.2017	5.43903e-15	2.87724e-12	9.4939e-25	2.27854e-23	[-1]	Group25	21.5686	22	None Specific Cluster	[PSMB3, PSMB6, PSMC2, PSMD13, PSMD2, PSMD4, PSME1, RPS27A, UBB]	[PSMA1, PSMA2, PSMA3, PSMA4, PSMA5, PSMA6, PSMA8, PSMB1, PSMB2, PSMB4, PSME2, TNFRSF6B, UBC]	40.9091	59.0909	[PSMA1, PSMA2, PSMA3, PSMA4, PSMA5, PSMA6, PSMA8, PSMB1, PSMB2, PSMB3, PSMB4, PSMB6, PSMC2, PSMD13, PSMD2, PSMD4, PSME1, PSME2, RPS27A, TNFRSF6B, UBB, UBC]
R-HSA:5673001	RAF/MAP kinase cascade	REACTOME_Pathways_20.11.2017	2.54262e-12	1.23572e-09	9.4939e-25	2.27854e-23	[-1]	Group25	11.9342	29	None Specific Cluster	[ACTG1, IQGAP1, PSMB3, PSMB6, PSMC2, PSMD13, PSMD2, PSMD4, PSME1, PTK2, RPS27A, SPTAN1, SPTBN4, UBB, YWHAB]	[ACTB, CALM1, PSMA1, PSMA2, PSMA3, PSMA4, PSMA5, PSMA6, PSMA8, PSMB1, PSMB2, PSMB4, PSME2, UBC]	51.7241	48.2759	[ACTB, ACTG1, CALM1, IQGAP1, PSMA1, PSMA2, PSMA3, PSMA4, PSMA5, PSMA6, PSMA8, PSMB1, PSMB2, PSMB3, PSMB4, PSMB6, PSMC2, PSMD13, PSMD2, PSMD4, PSME1, PSME2, PTK2, RPS27A, SPTAN1, SPTBN4, UBB, UBC, YWHAB]
R-HSA:5676590	NIK-->noncanonical NF-kB signaling	REACTOME_Pathways_20.11.2017	2.60571e-19	1.54518e-16	9.4939e-25	2.27854e-23	[-1]	Group25	35.5932	21	None Specific Cluster	[PSMB3, PSMB6, PSMC2, PSMD13, PSMD2, PSMD4, PSME1, RPS27A, UBB]	[PSMA1, PSMA2, PSMA3, PSMA4, PSMA5, PSMA6, PSMA8, PSMB1, PSMB2, PSMB4, PSME2, UBC]	42.8571	57.1429	[PSMA1, PSMA2, PSMA3, PSMA4, PSMA5, PSMA6, PSMA8, PSMB1, PSMB2, PSMB3, PSMB4, PSMB6, PSMC2, PSMD13, PSMD2, PSMD4, PSME1, PSME2, RPS27A, UBB, UBC]
R-HSA:5678895	Defective CFTR causes cystic fibrosis	REACTOME_Pathways_20.11.2017	2.56978e-20	1.54444e-17	9.4939e-25	2.27854e-23	[-1]	Group25	36.0656	22	None Specific Cluster	[PSMB3, PSMB6, PSMC2, PSMD13, PSMD2, PSMD4, PSME1, RPS27A, UBB]	[PSMA1, PSMA2, PSMA3, PSMA4, PSMA5, PSMA6, PSMA8, PSMB1, PSMB2, PSMB4, PSME2, UBC, VCP]	40.9091	59.0909	[PSMA1, PSMA2, PSMA3, PSMA4, PSMA5, PSMA6, PSMA8, PSMB1, PSMB2, PSMB3, PSMB4, PSMB6, PSMC2, PSMD13, PSMD2, PSMD4, PSME1, PSME2, RPS27A, UBB, UBC, VCP]
R-HSA:5683057	MAPK family signaling cascades	REACTOME_Pathways_20.11.2017	2.40008e-13	1.20964e-10	9.4939e-25	2.27854e-23	[-1]	Group25	11.4583	33	None Specific Cluster	[ACTG1, AGO1, AGO3, IQGAP1, PSMB3, PSMB6, PSMC2, PSMD13, PSMD2, PSMD4, PSME1, PTK2, RAG1, RPS27A, SPTAN1, SPTBN4, UBB, YWHAB]	[ACTB, AGO2, CALM1, PSMA1, PSMA2, PSMA3, PSMA4, PSMA5, PSMA6, PSMA8, PSMB1, PSMB2, PSMB4, PSME2, UBC]	54.5455	45.4545	[ACTB, ACTG1, AGO1, AGO2, AGO3, CALM1, IQGAP1, PSMA1, PSMA2, PSMA3, PSMA4, PSMA5, PSMA6, PSMA8, PSMB1, PSMB2, PSMB3, PSMB4, PSMB6, PSMC2, PSMD13, PSMD2, PSMD4, PSME1, PSME2, PTK2, RAG1, RPS27A, SPTAN1, SPTBN4, UBB, UBC, YWHAB]
R-HSA:5684996	MAPK1/MAPK3 signaling	REACTOME_Pathways_20.11.2017	4.69894e-12	2.26489e-09	9.4939e-25	2.27854e-23	[-1]	Group25	11.6466	29	None Specific Cluster	[ACTG1, IQGAP1, PSMB3, PSMB6, PSMC2, PSMD13, PSMD2, PSMD4, PSME1, PTK2, RPS27A, SPTAN1, SPTBN4, UBB, YWHAB]	[ACTB, CALM1, PSMA1, PSMA2, PSMA3, PSMA4, PSMA5, PSMA6, PSMA8, PSMB1, PSMB2, PSMB4, PSME2, UBC]	51.7241	48.2759	[ACTB, ACTG1, CALM1, IQGAP1, PSMA1, PSMA2, PSMA3, PSMA4, PSMA5, PSMA6, PSMA8, PSMB1, PSMB2, PSMB3, PSMB4, PSMB6, PSMC2, PSMD13, PSMD2, PSMD4, PSME1, PSME2, PTK2, RPS27A, SPTAN1, SPTBN4, UBB, UBC, YWHAB]
R-HSA:5687128	MAPK6/MAPK4 signaling	REACTOME_Pathways_20.11.2017	7.19118e-20	4.29313e-17	9.4939e-25	2.27854e-23	[-1]	Group25	28.0899	25	None Specific Cluster	[AGO1, AGO3, PSMB3, PSMB6, PSMC2, PSMD13, PSMD2, PSMD4, PSME1, RAG1, RPS27A, UBB]	[AGO2, PSMA1, PSMA2, PSMA3, PSMA4, PSMA5, PSMA6, PSMA8, PSMB1, PSMB2, PSMB4, PSME2, UBC]	48	52	[AGO1, AGO2, AGO3, PSMA1, PSMA2, PSMA3, PSMA4, PSMA5, PSMA6, PSMA8, PSMB1, PSMB2, PSMB3, PSMB4, PSMB6, PSMC2, PSMD13, PSMD2, PSMD4, PSME1, PSME2, RAG1, RPS27A, UBB, UBC]
R-HSA:5688426	Deubiquitination	REACTOME_Pathways_20.11.2017	7.39237e-11	3.43006e-08	9.4939e-25	2.27854e-23	[-1]	Group25	10.101	30	None Specific Cluster	[PSMB3, PSMB6, PSMC2, PSMD13, PSMD2, PSMD4, PSME1, RAD23A, RPS27A, UBB, USP19, VDAC1, VDAC2, YOD1]	[ACTB, OTUB2, PSMA1, PSMA2, PSMA3, PSMA4, PSMA5, PSMA6, PSMA8, PSMB1, PSMB2, PSMB4, PSME2, RAD23B, UBC, VCP]	46.6667	53.3333	[ACTB, OTUB2, PSMA1, PSMA2, PSMA3, PSMA4, PSMA5, PSMA6, PSMA8, PSMB1, PSMB2, PSMB3, PSMB4, PSMB6, PSMC2, PSMD13, PSMD2, PSMD4, PSME1, PSME2, RAD23A, RAD23B, RPS27A, UBB, UBC, USP19, VCP, VDAC1, VDAC2, YOD1]
R-HSA:5689603	UCH proteinases	REACTOME_Pathways_20.11.2017	5.43903e-15	2.87724e-12	9.4939e-25	2.27854e-23	[-1]	Group25	21.5686	22	None Specific Cluster	[PSMB3, PSMB6, PSMC2, PSMD13, PSMD2, PSMD4, PSME1, RPS27A, UBB]	[ACTB, PSMA1, PSMA2, PSMA3, PSMA4, PSMA5, PSMA6, PSMA8, PSMB1, PSMB2, PSMB4, PSME2, UBC]	40.9091	59.0909	[ACTB, PSMA1, PSMA2, PSMA3, PSMA4, PSMA5, PSMA6, PSMA8, PSMB1, PSMB2, PSMB3, PSMB4, PSMB6, PSMC2, PSMD13, PSMD2, PSMD4, PSME1, PSME2, RPS27A, UBB, UBC]
R-HSA:5689880	Ub-specific processing proteases	REACTOME_Pathways_20.11.2017	1.2964e-09	5.70416e-07	9.4939e-25	2.27854e-23	[-1]	Group25	10.9091	24	None Specific Cluster	[PSMB3, PSMB6, PSMC2, PSMD13, PSMD2, PSMD4, PSME1, RPS27A, UBB, USP19, VDAC1, VDAC2]	[PSMA1, PSMA2, PSMA3, PSMA4, PSMA5, PSMA6, PSMA8, PSMB1, PSMB2, PSMB4, PSME2, UBC]	50	50	[PSMA1, PSMA2, PSMA3, PSMA4, PSMA5, PSMA6, PSMA8, PSMB1, PSMB2, PSMB3, PSMB4, PSMB6, PSMC2, PSMD13, PSMD2, PSMD4, PSME1, PSME2, RPS27A, UBB, UBC, USP19, VDAC1, VDAC2]
R-HSA:6791226	Major pathway of rRNA processing in the nucleolus and cytosol	REACTOME_Pathways_20.11.2017	7.25047e-05	0.022549	9.4939e-25	2.27854e-23	[-1]	Group25	7.97872	15	Specific for Cluster #1	[NCL, RPL12, RPL13, RPL7, RPL9, RPS11, RPS12, RPS20, RPS24, RPS27A, SNU13]	[BOP1, RPL22, RPL4, RPS18]	73.3333	26.6667	[BOP1, NCL, RPL12, RPL13, RPL22, RPL4, RPL7, RPL9, RPS11, RPS12, RPS18, RPS20, RPS24, RPS27A, SNU13]
R-HSA:6798695	Neutrophil degranulation	REACTOME_Pathways_20.11.2017	2.82739e-10	1.28646e-07	9.4939e-25	2.27854e-23	[-1]	Group25	7.93319	38	Specific for Cluster #1	[ACTR1B, CAT, COPB1, DBNL, DYNC1H1, EEF2, FRK, GDI2, HSPA1A, HUWE1, ILF2, IQGAP1, MGST1, NIT2, PRDX4, PRDX6, PRSS3, PSMC2, PSMD13, PSMD2, PYCARD, RAB5B, RAB5C, SERPINB1, SERPINB6, SPTAN1]	[ALAD, FTH1, HSPA6, HSPA8, NME2, PGAM1, PSMA2, PSMA5, PSMB1, RAB7A, RAP2B, VCP]	68.4211	31.5789	[ACTR1B, ALAD, CAT, COPB1, DBNL, DYNC1H1, EEF2, FRK, FTH1, GDI2, HSPA1A, HSPA6, HSPA8, HUWE1, ILF2, IQGAP1, MGST1, NIT2, NME2, PGAM1, PRDX4, PRDX6, PRSS3, PSMA2, PSMA5, PSMB1, PSMC2, PSMD13, PSMD2, PYCARD, RAB5B, RAB5C, RAB7A, RAP2B, SERPINB1, SERPINB6, SPTAN1, VCP]
R-HSA:6807070	PTEN Regulation	REACTOME_Pathways_20.11.2017	7.94309e-15	4.17807e-12	9.4939e-25	2.27854e-23	[-1]	Group25	17.8571	25	None Specific Cluster	[AGO1, AGO3, FRK, PSMB3, PSMB6, PSMC2, PSMD13, PSMD2, PSMD4, PSME1, RPS27A, UBB]	[AGO2, PSMA1, PSMA2, PSMA3, PSMA4, PSMA5, PSMA6, PSMA8, PSMB1, PSMB2, PSMB4, PSME2, UBC]	48	52	[AGO1, AGO2, AGO3, FRK, PSMA1, PSMA2, PSMA3, PSMA4, PSMA5, PSMA6, PSMA8, PSMB1, PSMB2, PSMB3, PSMB4, PSMB6, PSMC2, PSMD13, PSMD2, PSMD4, PSME1, PSME2, RPS27A, UBB, UBC]
R-HSA:68827	CDT1 association with the CDC6:ORC:origin complex	REACTOME_Pathways_20.11.2017	2.60571e-19	1.54518e-16	9.4939e-25	2.27854e-23	[-1]	Group25	35.5932	21	None Specific Cluster	[PSMB3, PSMB6, PSMC2, PSMD13, PSMD2, PSMD4, PSME1, RPS27A, UBB]	[PSMA1, PSMA2, PSMA3, PSMA4, PSMA5, PSMA6, PSMA8, PSMB1, PSMB2, PSMB4, PSME2, UBC]	42.8571	57.1429	[PSMA1, PSMA2, PSMA3, PSMA4, PSMA5, PSMA6, PSMA8, PSMB1, PSMB2, PSMB3, PSMB4, PSMB6, PSMC2, PSMD13, PSMD2, PSMD4, PSME1, PSME2, RPS27A, UBB, UBC]
R-HSA:68867	Assembly of the pre-replicative complex	REACTOME_Pathways_20.11.2017	7.67274e-18	4.42717e-15	9.4939e-25	2.27854e-23	[-1]	Group25	30.8824	21	None Specific Cluster	[PSMB3, PSMB6, PSMC2, PSMD13, PSMD2, PSMD4, PSME1, RPS27A, UBB]	[PSMA1, PSMA2, PSMA3, PSMA4, PSMA5, PSMA6, PSMA8, PSMB1, PSMB2, PSMB4, PSME2, UBC]	42.8571	57.1429	[PSMA1, PSMA2, PSMA3, PSMA4, PSMA5, PSMA6, PSMA8, PSMB1, PSMB2, PSMB3, PSMB4, PSMB6, PSMC2, PSMD13, PSMD2, PSMD4, PSME1, PSME2, RPS27A, UBB, UBC]
R-HSA:68874	M/G1 Transition	REACTOME_Pathways_20.11.2017	8.48223e-17	4.74157e-14	9.4939e-25	2.27854e-23	[-1]	Group25	25.8824	22	None Specific Cluster	[PSMB3, PSMB6, PSMC2, PSMD13, PSMD2, PSMD4, PSME1, RPS27A, UBB]	[PRIM2, PSMA1, PSMA2, PSMA3, PSMA4, PSMA5, PSMA6, PSMA8, PSMB1, PSMB2, PSMB4, PSME2, UBC]	40.9091	59.0909	[PRIM2, PSMA1, PSMA2, PSMA3, PSMA4, PSMA5, PSMA6, PSMA8, PSMB1, PSMB2, PSMB3, PSMB4, PSMB6, PSMC2, PSMD13, PSMD2, PSMD4, PSME1, PSME2, RPS27A, UBB, UBC]
R-HSA:68882	Mitotic Anaphase	REACTOME_Pathways_20.11.2017	6.26415e-12	3.01305e-09	9.4939e-25	2.27854e-23	[-1]	Group25	12.8713	26	None Specific Cluster	[CLIP1, DYNC1H1, LMNA, PAFAH1B1, PSMB3, PSMB6, PSMC2, PSMD13, PSMD2, PSMD4, PSME1, RPS27A, UBB]	[BANF1, PSMA1, PSMA2, PSMA3, PSMA4, PSMA5, PSMA6, PSMA8, PSMB1, PSMB2, PSMB4, PSME2, UBC]	50	50	[BANF1, CLIP1, DYNC1H1, LMNA, PAFAH1B1, PSMA1, PSMA2, PSMA3, PSMA4, PSMA5, PSMA6, PSMA8, PSMB1, PSMB2, PSMB3, PSMB4, PSMB6, PSMC2, PSMD13, PSMD2, PSMD4, PSME1, PSME2, RPS27A, UBB, UBC]
R-HSA:68886	M Phase	REACTOME_Pathways_20.11.2017	1.20297e-09	5.30509e-07	9.4939e-25	2.27854e-23	[-1]	Group25	8.35443	33	None Specific Cluster	[CLIP1, DYNC1H1, LMNA, PAFAH1B1, PSMB3, PSMB6, PSMC2, PSMD13, PSMD2, PSMD4, PSME1, RAB1A, RPS27A, UBB]	[BANF1, HIST1H4K, HIST2H3D, NUP210, PSMA1, PSMA2, PSMA3, PSMA4, PSMA5, PSMA6, PSMA8, PSMB1, PSMB2, PSMB4, PSME2, RAB1B, UBC, YWHAE, YWHAG]	42.4242	57.5758	[BANF1, CLIP1, DYNC1H1, HIST1H4K, HIST2H3D, LMNA, NUP210, PAFAH1B1, PSMA1, PSMA2, PSMA3, PSMA4, PSMA5, PSMA6, PSMA8, PSMB1, PSMB2, PSMB3, PSMB4, PSMB6, PSMC2, PSMD13, PSMD2, PSMD4, PSME1, PSME2, RAB1A, RAB1B, RPS27A, UBB, UBC, YWHAE, YWHAG]
R-HSA:68949	Orc1 removal from chromatin	REACTOME_Pathways_20.11.2017	2.08927e-17	1.19297e-14	9.4939e-25	2.27854e-23	[-1]	Group25	29.5775	21	None Specific Cluster	[PSMB3, PSMB6, PSMC2, PSMD13, PSMD2, PSMD4, PSME1, RPS27A, UBB]	[PSMA1, PSMA2, PSMA3, PSMA4, PSMA5, PSMA6, PSMA8, PSMB1, PSMB2, PSMB4, PSME2, UBC]	42.8571	57.1429	[PSMA1, PSMA2, PSMA3, PSMA4, PSMA5, PSMA6, PSMA8, PSMB1, PSMB2, PSMB3, PSMB4, PSMB6, PSMC2, PSMD13, PSMD2, PSMD4, PSME1, PSME2, RPS27A, UBB, UBC]
R-HSA:69002	DNA Replication Pre-Initiation	REACTOME_Pathways_20.11.2017	8.48223e-17	4.74157e-14	9.4939e-25	2.27854e-23	[-1]	Group25	25.8824	22	None Specific Cluster	[PSMB3, PSMB6, PSMC2, PSMD13, PSMD2, PSMD4, PSME1, RPS27A, UBB]	[PRIM2, PSMA1, PSMA2, PSMA3, PSMA4, PSMA5, PSMA6, PSMA8, PSMB1, PSMB2, PSMB4, PSME2, UBC]	40.9091	59.0909	[PRIM2, PSMA1, PSMA2, PSMA3, PSMA4, PSMA5, PSMA6, PSMA8, PSMB1, PSMB2, PSMB3, PSMB4, PSMB6, PSMC2, PSMD13, PSMD2, PSMD4, PSME1, PSME2, RPS27A, UBB, UBC]
R-HSA:69017	CDK-mediated phosphorylation and removal of Cdc6	REACTOME_Pathways_20.11.2017	6.89844e-21	4.17356e-18	9.4939e-25	2.27854e-23	[-1]	Group25	41.1765	21	None Specific Cluster	[PSMB3, PSMB6, PSMC2, PSMD13, PSMD2, PSMD4, PSME1, RPS27A, UBB]	[PSMA1, PSMA2, PSMA3, PSMA4, PSMA5, PSMA6, PSMA8, PSMB1, PSMB2, PSMB4, PSME2, UBC]	42.8571	57.1429	[PSMA1, PSMA2, PSMA3, PSMA4, PSMA5, PSMA6, PSMA8, PSMB1, PSMB2, PSMB3, PSMB4, PSMB6, PSMC2, PSMD13, PSMD2, PSMD4, PSME1, PSME2, RPS27A, UBB, UBC]
R-HSA:69052	Switching of origins to a post-replicative state	REACTOME_Pathways_20.11.2017	2.08927e-17	1.19297e-14	9.4939e-25	2.27854e-23	[-1]	Group25	29.5775	21	None Specific Cluster	[PSMB3, PSMB6, PSMC2, PSMD13, PSMD2, PSMD4, PSME1, RPS27A, UBB]	[PSMA1, PSMA2, PSMA3, PSMA4, PSMA5, PSMA6, PSMA8, PSMB1, PSMB2, PSMB4, PSME2, UBC]	42.8571	57.1429	[PSMA1, PSMA2, PSMA3, PSMA4, PSMA5, PSMA6, PSMA8, PSMB1, PSMB2, PSMB3, PSMB4, PSMB6, PSMC2, PSMD13, PSMD2, PSMD4, PSME1, PSME2, RPS27A, UBB, UBC]
R-HSA:69202	Cyclin E associated events during G1/S transition	REACTOME_Pathways_20.11.2017	5.44287e-16	2.97725e-13	9.4939e-25	2.27854e-23	[-1]	Group25	25.6098	21	None Specific Cluster	[CCNE1, PSMB3, PSMB6, PSMC2, PSMD13, PSMD2, PSMD4, PSME1, RPS27A, UBB]	[PSMA1, PSMA2, PSMA3, PSMA4, PSMA5, PSMA6, PSMB1, PSMB2, PSMB4, PSME2, UBC]	47.619	52.381	[CCNE1, PSMA1, PSMA2, PSMA3, PSMA4, PSMA5, PSMA6, PSMB1, PSMB2, PSMB3, PSMB4, PSMB6, PSMC2, PSMD13, PSMD2, PSMD4, PSME1, PSME2, RPS27A, UBB, UBC]
R-HSA:69206	G1/S Transition	REACTOME_Pathways_20.11.2017	8.86296e-13	4.3783e-10	9.4939e-25	2.27854e-23	[-1]	Group25	17.0543	22	None Specific Cluster	[CCNE1, PSMB3, PSMB6, PSMC2, PSMD13, PSMD2, PSMD4, PSME1, RPS27A, UBB]	[PRIM2, PSMA1, PSMA2, PSMA3, PSMA4, PSMA5, PSMA6, PSMB1, PSMB2, PSMB4, PSME2, UBC]	45.4545	54.5455	[CCNE1, PRIM2, PSMA1, PSMA2, PSMA3, PSMA4, PSMA5, PSMA6, PSMB1, PSMB2, PSMB3, PSMB4, PSMB6, PSMC2, PSMD13, PSMD2, PSMD4, PSME1, PSME2, RPS27A, UBB, UBC]
R-HSA:69229	Ubiquitin-dependent degradation of Cyclin D1	REACTOME_Pathways_20.11.2017	6.89844e-21	4.17356e-18	9.4939e-25	2.27854e-23	[-1]	Group25	41.1765	21	None Specific Cluster	[PSMB3, PSMB6, PSMC2, PSMD13, PSMD2, PSMD4, PSME1, RPS27A, UBB]	[PSMA1, PSMA2, PSMA3, PSMA4, PSMA5, PSMA6, PSMA8, PSMB1, PSMB2, PSMB4, PSME2, UBC]	42.8571	57.1429	[PSMA1, PSMA2, PSMA3, PSMA4, PSMA5, PSMA6, PSMA8, PSMB1, PSMB2, PSMB3, PSMB4, PSMB6, PSMC2, PSMD13, PSMD2, PSMD4, PSME1, PSME2, RPS27A, UBB, UBC]
R-HSA:69239	Synthesis of DNA	REACTOME_Pathways_20.11.2017	3.49265e-15	1.8546e-12	9.4939e-25	2.27854e-23	[-1]	Group25	22	22	None Specific Cluster	[PSMB3, PSMB6, PSMC2, PSMD13, PSMD2, PSMD4, PSME1, RPS27A, UBB]	[PRIM2, PSMA1, PSMA2, PSMA3, PSMA4, PSMA5, PSMA6, PSMA8, PSMB1, PSMB2, PSMB4, PSME2, UBC]	40.9091	59.0909	[PRIM2, PSMA1, PSMA2, PSMA3, PSMA4, PSMA5, PSMA6, PSMA8, PSMB1, PSMB2, PSMB3, PSMB4, PSMB6, PSMC2, PSMD13, PSMD2, PSMD4, PSME1, PSME2, RPS27A, UBB, UBC]
R-HSA:69242	S Phase	REACTOME_Pathways_20.11.2017	5.17526e-13	2.57728e-10	9.4939e-25	2.27854e-23	[-1]	Group25	16.5468	23	None Specific Cluster	[CCNE1, PSMB3, PSMB6, PSMC2, PSMD13, PSMD2, PSMD4, PSME1, RPS27A, UBB]	[PRIM2, PSMA1, PSMA2, PSMA3, PSMA4, PSMA5, PSMA6, PSMA8, PSMB1, PSMB2, PSMB4, PSME2, UBC]	43.4783	56.5217	[CCNE1, PRIM2, PSMA1, PSMA2, PSMA3, PSMA4, PSMA5, PSMA6, PSMA8, PSMB1, PSMB2, PSMB3, PSMB4, PSMB6, PSMC2, PSMD13, PSMD2, PSMD4, PSME1, PSME2, RPS27A, UBB, UBC]
R-HSA:69275	G2/M Transition	REACTOME_Pathways_20.11.2017	3.10797e-12	1.50426e-09	9.4939e-25	2.27854e-23	[-1]	Group25	13.2653	26	None Specific Cluster	[DYNC1H1, PAFAH1B1, PSMB3, PSMB6, PSMC2, PSMD13, PSMD2, PSMD4, PSME1, RAB8A, RPS27A, UBB]	[PSMA1, PSMA2, PSMA3, PSMA4, PSMA5, PSMA6, PSMA8, PSMB1, PSMB2, PSMB4, PSME2, UBC, YWHAE, YWHAG]	46.1538	53.8462	[DYNC1H1, PAFAH1B1, PSMA1, PSMA2, PSMA3, PSMA4, PSMA5, PSMA6, PSMA8, PSMB1, PSMB2, PSMB3, PSMB4, PSMB6, PSMC2, PSMD13, PSMD2, PSMD4, PSME1, PSME2, RAB8A, RPS27A, UBB, UBC, YWHAE, YWHAG]
R-HSA:69300	Removal of licensing factors from origins	REACTOME_Pathways_20.11.2017	3.95585e-17	2.23505e-14	9.4939e-25	2.27854e-23	[-1]	Group25	28.7671	21	None Specific Cluster	[PSMB3, PSMB6, PSMC2, PSMD13, PSMD2, PSMD4, PSME1, RPS27A, UBB]	[PSMA1, PSMA2, PSMA3, PSMA4, PSMA5, PSMA6, PSMA8, PSMB1, PSMB2, PSMB4, PSME2, UBC]	42.8571	57.1429	[PSMA1, PSMA2, PSMA3, PSMA4, PSMA5, PSMA6, PSMA8, PSMB1, PSMB2, PSMB3, PSMB4, PSMB6, PSMC2, PSMD13, PSMD2, PSMD4, PSME1, PSME2, RPS27A, UBB, UBC]
R-HSA:69304	Regulation of DNA replication	REACTOME_Pathways_20.11.2017	9.89828e-17	5.52324e-14	9.4939e-25	2.27854e-23	[-1]	Group25	27.6316	21	None Specific Cluster	[PSMB3, PSMB6, PSMC2, PSMD13, PSMD2, PSMD4, PSME1, RPS27A, UBB]	[PSMA1, PSMA2, PSMA3, PSMA4, PSMA5, PSMA6, PSMA8, PSMB1, PSMB2, PSMB4, PSME2, UBC]	42.8571	57.1429	[PSMA1, PSMA2, PSMA3, PSMA4, PSMA5, PSMA6, PSMA8, PSMB1, PSMB2, PSMB3, PSMB4, PSMB6, PSMC2, PSMD13, PSMD2, PSMD4, PSME1, PSME2, RPS27A, UBB, UBC]
R-HSA:69306	DNA Replication	REACTOME_Pathways_20.11.2017	1.93022e-14	1.00564e-11	9.4939e-25	2.27854e-23	[-1]	Group25	20.3704	22	None Specific Cluster	[PSMB3, PSMB6, PSMC2, PSMD13, PSMD2, PSMD4, PSME1, RPS27A, UBB]	[PRIM2, PSMA1, PSMA2, PSMA3, PSMA4, PSMA5, PSMA6, PSMA8, PSMB1, PSMB2, PSMB4, PSME2, UBC]	40.9091	59.0909	[PRIM2, PSMA1, PSMA2, PSMA3, PSMA4, PSMA5, PSMA6, PSMA8, PSMB1, PSMB2, PSMB3, PSMB4, PSMB6, PSMC2, PSMD13, PSMD2, PSMD4, PSME1, PSME2, RPS27A, UBB, UBC]
R-HSA:69481	G2/M Checkpoints	REACTOME_Pathways_20.11.2017	1.19843e-15	6.4955e-13	9.4939e-25	2.27854e-23	[-1]	Group25	16.6667	28	Specific for Cluster #2	[BLM, PSMB3, PSMB6, PSMC2, PSMD13, PSMD2, PSMD4, PSME1, RPS27A, UBB, YWHAB]	[HIST1H4K, PSMA1, PSMA2, PSMA3, PSMA4, PSMA5, PSMA6, PSMA8, PSMB1, PSMB2, PSMB4, PSME2, UBC, YWHAE, YWHAG, YWHAQ, YWHAZ]	39.2857	60.7143	[BLM, HIST1H4K, PSMA1, PSMA2, PSMA3, PSMA4, PSMA5, PSMA6, PSMA8, PSMB1, PSMB2, PSMB3, PSMB4, PSMB6, PSMC2, PSMD13, PSMD2, PSMD4, PSME1, PSME2, RPS27A, UBB, UBC, YWHAB, YWHAE, YWHAG, YWHAQ, YWHAZ]
R-HSA:69541	Stabilization of p53	REACTOME_Pathways_20.11.2017	1.12064e-19	6.67903e-17	9.4939e-25	2.27854e-23	[-1]	Group25	36.8421	21	None Specific Cluster	[PSMB3, PSMB6, PSMC2, PSMD13, PSMD2, PSMD4, PSME1, RPS27A, UBB]	[PSMA1, PSMA2, PSMA3, PSMA4, PSMA5, PSMA6, PSMA8, PSMB1, PSMB2, PSMB4, PSME2, UBC]	42.8571	57.1429	[PSMA1, PSMA2, PSMA3, PSMA4, PSMA5, PSMA6, PSMA8, PSMB1, PSMB2, PSMB3, PSMB4, PSMB6, PSMC2, PSMD13, PSMD2, PSMD4, PSME1, PSME2, RPS27A, UBB, UBC]
R-HSA:69563	p53-Dependent G1 DNA Damage Response	REACTOME_Pathways_20.11.2017	1.88653e-19	1.12249e-16	9.4939e-25	2.27854e-23	[-1]	Group25	33.3333	22	None Specific Cluster	[CCNE1, PSMB3, PSMB6, PSMC2, PSMD13, PSMD2, PSMD4, PSME1, RPS27A, UBB]	[PSMA1, PSMA2, PSMA3, PSMA4, PSMA5, PSMA6, PSMA8, PSMB1, PSMB2, PSMB4, PSME2, UBC]	45.4545	54.5455	[CCNE1, PSMA1, PSMA2, PSMA3, PSMA4, PSMA5, PSMA6, PSMA8, PSMB1, PSMB2, PSMB3, PSMB4, PSMB6, PSMC2, PSMD13, PSMD2, PSMD4, PSME1, PSME2, RPS27A, UBB, UBC]
R-HSA:69580	p53-Dependent G1/S DNA damage checkpoint	REACTOME_Pathways_20.11.2017	1.88653e-19	1.12249e-16	9.4939e-25	2.27854e-23	[-1]	Group25	33.3333	22	None Specific Cluster	[CCNE1, PSMB3, PSMB6, PSMC2, PSMD13, PSMD2, PSMD4, PSME1, RPS27A, UBB]	[PSMA1, PSMA2, PSMA3, PSMA4, PSMA5, PSMA6, PSMA8, PSMB1, PSMB2, PSMB4, PSME2, UBC]	45.4545	54.5455	[CCNE1, PSMA1, PSMA2, PSMA3, PSMA4, PSMA5, PSMA6, PSMA8, PSMB1, PSMB2, PSMB3, PSMB4, PSMB6, PSMC2, PSMD13, PSMD2, PSMD4, PSME1, PSME2, RPS27A, UBB, UBC]
R-HSA:69601	Ubiquitin Mediated Degradation of Phosphorylated Cdc25A	REACTOME_Pathways_20.11.2017	1.83098e-20	1.10225e-17	9.4939e-25	2.27854e-23	[-1]	Group25	39.6226	21	None Specific Cluster	[PSMB3, PSMB6, PSMC2, PSMD13, PSMD2, PSMD4, PSME1, RPS27A, UBB]	[PSMA1, PSMA2, PSMA3, PSMA4, PSMA5, PSMA6, PSMA8, PSMB1, PSMB2, PSMB4, PSME2, UBC]	42.8571	57.1429	[PSMA1, PSMA2, PSMA3, PSMA4, PSMA5, PSMA6, PSMA8, PSMB1, PSMB2, PSMB3, PSMB4, PSMB6, PSMC2, PSMD13, PSMD2, PSMD4, PSME1, PSME2, RPS27A, UBB, UBC]
R-HSA:69610	p53-Independent DNA Damage Response	REACTOME_Pathways_20.11.2017	1.83098e-20	1.10225e-17	9.4939e-25	2.27854e-23	[-1]	Group25	39.6226	21	None Specific Cluster	[PSMB3, PSMB6, PSMC2, PSMD13, PSMD2, PSMD4, PSME1, RPS27A, UBB]	[PSMA1, PSMA2, PSMA3, PSMA4, PSMA5, PSMA6, PSMA8, PSMB1, PSMB2, PSMB4, PSME2, UBC]	42.8571	57.1429	[PSMA1, PSMA2, PSMA3, PSMA4, PSMA5, PSMA6, PSMA8, PSMB1, PSMB2, PSMB3, PSMB4, PSMB6, PSMC2, PSMD13, PSMD2, PSMD4, PSME1, PSME2, RPS27A, UBB, UBC]
R-HSA:69613	p53-Independent G1/S DNA damage checkpoint	REACTOME_Pathways_20.11.2017	1.83098e-20	1.10225e-17	9.4939e-25	2.27854e-23	[-1]	Group25	39.6226	21	None Specific Cluster	[PSMB3, PSMB6, PSMC2, PSMD13, PSMD2, PSMD4, PSME1, RPS27A, UBB]	[PSMA1, PSMA2, PSMA3, PSMA4, PSMA5, PSMA6, PSMA8, PSMB1, PSMB2, PSMB4, PSME2, UBC]	42.8571	57.1429	[PSMA1, PSMA2, PSMA3, PSMA4, PSMA5, PSMA6, PSMA8, PSMB1, PSMB2, PSMB3, PSMB4, PSMB6, PSMC2, PSMD13, PSMD2, PSMD4, PSME1, PSME2, RPS27A, UBB, UBC]
R-HSA:69615	G1/S DNA Damage Checkpoints	REACTOME_Pathways_20.11.2017	3.96681e-19	2.34439e-16	9.4939e-25	2.27854e-23	[-1]	Group25	32.3529	22	None Specific Cluster	[CCNE1, PSMB3, PSMB6, PSMC2, PSMD13, PSMD2, PSMD4, PSME1, RPS27A, UBB]	[PSMA1, PSMA2, PSMA3, PSMA4, PSMA5, PSMA6, PSMA8, PSMB1, PSMB2, PSMB4, PSME2, UBC]	45.4545	54.5455	[CCNE1, PSMA1, PSMA2, PSMA3, PSMA4, PSMA5, PSMA6, PSMA8, PSMB1, PSMB2, PSMB3, PSMB4, PSMB6, PSMC2, PSMD13, PSMD2, PSMD4, PSME1, PSME2, RPS27A, UBB, UBC]
R-HSA:69620	Cell Cycle Checkpoints	REACTOME_Pathways_20.11.2017	2.08095e-12	1.01758e-09	9.4939e-25	2.27854e-23	[-1]	Group25	10.9215	32	None Specific Cluster	[BLM, CCNE1, CLIP1, DYNC1H1, PAFAH1B1, PSMB3, PSMB6, PSMC2, PSMD13, PSMD2, PSMD4, PSME1, RPS27A, UBB, YWHAB]	[HIST1H4K, PSMA1, PSMA2, PSMA3, PSMA4, PSMA5, PSMA6, PSMA8, PSMB1, PSMB2, PSMB4, PSME2, UBC, YWHAE, YWHAG, YWHAQ, YWHAZ]	46.875	53.125	[BLM, CCNE1, CLIP1, DYNC1H1, HIST1H4K, PAFAH1B1, PSMA1, PSMA2, PSMA3, PSMA4, PSMA5, PSMA6, PSMA8, PSMB1, PSMB2, PSMB3, PSMB4, PSMB6, PSMC2, PSMD13, PSMD2, PSMD4, PSME1, PSME2, RPS27A, UBB, UBC, YWHAB, YWHAE, YWHAG, YWHAQ, YWHAZ]
R-HSA:69656	Cyclin A:Cdk2-associated events at S phase entry	REACTOME_Pathways_20.11.2017	4.1425e-16	2.27423e-13	9.4939e-25	2.27854e-23	[-1]	Group25	25.9259	21	None Specific Cluster	[CCNE1, PSMB3, PSMB6, PSMC2, PSMD13, PSMD2, PSMD4, PSME1, RPS27A, UBB]	[PSMA1, PSMA2, PSMA3, PSMA4, PSMA5, PSMA6, PSMB1, PSMB2, PSMB4, PSME2, UBC]	47.619	52.381	[CCNE1, PSMA1, PSMA2, PSMA3, PSMA4, PSMA5, PSMA6, PSMB1, PSMB2, PSMB3, PSMB4, PSMB6, PSMC2, PSMD13, PSMD2, PSMD4, PSME1, PSME2, RPS27A, UBB, UBC]
R-HSA:71291	Metabolism of amino acids and derivatives	REACTOME_Pathways_20.11.2017	7.54344e-14	3.87733e-11	9.4939e-25	2.27854e-23	[-1]	Group25	10.411	38	None Specific Cluster	[KYAT3, LARS, PSMB3, PSMB6, PSMC2, PSMD13, PSMD2, PSMD4, PSME1, QARS, RARS, RPL12, RPL13, RPL7, RPL9, RPS11, RPS12, RPS20, RPS24, RPS27A]	[ALDH9A1, HPD, MCCC1, MTAP, PSMA1, PSMA2, PSMA3, PSMA4, PSMA5, PSMA6, PSMA8, PSMB1, PSMB2, PSMB4, PSME2, RPL22, RPL4, RPS18]	52.6316	47.3684	[ALDH9A1, HPD, KYAT3, LARS, MCCC1, MTAP, PSMA1, PSMA2, PSMA3, PSMA4, PSMA5, PSMA6, PSMA8, PSMB1, PSMB2, PSMB3, PSMB4, PSMB6, PSMC2, PSMD13, PSMD2, PSMD4, PSME1, PSME2, QARS, RARS, RPL12, RPL13, RPL22, RPL4, RPL7, RPL9, RPS11, RPS12, RPS18, RPS20, RPS24, RPS27A]
R-HSA:72163	mRNA Splicing - Major Pathway	REACTOME_Pathways_20.11.2017	1.71699e-10	7.89817e-08	9.4939e-25	2.27854e-23	[-1]	Group25	12.5683	23	Specific for Cluster #1	[ALYREF, DHX15, HNRNPK, HNRNPL, HNRNPR, HNRNPUL1, NCBP1, RBM8A, RBMX, SNRNP200, SNRPG, SNU13, SNURF, SRSF3, SRSF6, WBP4]	[HNRNPA1, HSPA8, LSM4, SNRPD3, SRSF1, SRSF2, SRSF4]	69.5652	30.4348	[ALYREF, DHX15, HNRNPA1, HNRNPK, HNRNPL, HNRNPR, HNRNPUL1, HSPA8, LSM4, NCBP1, RBM8A, RBMX, SNRNP200, SNRPD3, SNRPG, SNU13, SNURF, SRSF1, SRSF2, SRSF3, SRSF4, SRSF6, WBP4]
R-HSA:72172	mRNA Splicing	REACTOME_Pathways_20.11.2017	4.07537e-10	1.83799e-07	9.4939e-25	2.27854e-23	[-1]	Group25	12.0419	23	Specific for Cluster #1	[ALYREF, DHX15, HNRNPK, HNRNPL, HNRNPR, HNRNPUL1, NCBP1, RBM8A, RBMX, SNRNP200, SNRPG, SNU13, SNURF, SRSF3, SRSF6, WBP4]	[HNRNPA1, HSPA8, LSM4, SNRPD3, SRSF1, SRSF2, SRSF4]	69.5652	30.4348	[ALYREF, DHX15, HNRNPA1, HNRNPK, HNRNPL, HNRNPR, HNRNPUL1, HSPA8, LSM4, NCBP1, RBM8A, RBMX, SNRNP200, SNRPD3, SNRPG, SNU13, SNURF, SRSF1, SRSF2, SRSF3, SRSF4, SRSF6, WBP4]
R-HSA:72203	Processing of Capped Intron-Containing Pre-mRNA	REACTOME_Pathways_20.11.2017	9.46912e-09	4.00544e-06	9.4939e-25	2.27854e-23	[-1]	Group25	9.87654	24	Specific for Cluster #1	[ALYREF, DHX15, HNRNPK, HNRNPL, HNRNPR, HNRNPUL1, NCBP1, RBM8A, RBMX, SNRNP200, SNRPG, SNU13, SNURF, SRSF3, SRSF6, WBP4]	[HNRNPA1, HSPA8, LSM4, NUP210, SNRPD3, SRSF1, SRSF2, SRSF4]	66.6667	33.3333	[ALYREF, DHX15, HNRNPA1, HNRNPK, HNRNPL, HNRNPR, HNRNPUL1, HSPA8, LSM4, NCBP1, NUP210, RBM8A, RBMX, SNRNP200, SNRPD3, SNRPG, SNU13, SNURF, SRSF1, SRSF2, SRSF3, SRSF4, SRSF6, WBP4]
R-HSA:72312	rRNA processing	REACTOME_Pathways_20.11.2017	6.51303e-05	0.0206463	9.4939e-25	2.27854e-23	[-1]	Group25	7.69231	16	Specific for Cluster #1	[NCL, NOP2, RPL12, RPL13, RPL7, RPL9, RPS11, RPS12, RPS20, RPS24, RPS27A, SNU13]	[BOP1, RPL22, RPL4, RPS18]	75	25	[BOP1, NCL, NOP2, RPL12, RPL13, RPL22, RPL4, RPL7, RPL9, RPS11, RPS12, RPS18, RPS20, RPS24, RPS27A, SNU13]
R-HSA:72613	Eukaryotic Translation Initiation	REACTOME_Pathways_20.11.2017	1.08734e-09	4.8169e-07	9.4939e-25	2.27854e-23	[-1]	Group25	14.876	18	Specific for Cluster #1	[EIF2S1, EIF2S2, EIF3M, EIF4A1, EIF4A2, EIF4H, RPL12, RPL13, RPL7, RPL9, RPS11, RPS12, RPS20, RPS24, RPS27A]	[RPL22, RPL4, RPS18]	83.3333	16.6667	[EIF2S1, EIF2S2, EIF3M, EIF4A1, EIF4A2, EIF4H, RPL12, RPL13, RPL22, RPL4, RPL7, RPL9, RPS11, RPS12, RPS18, RPS20, RPS24, RPS27A]
R-HSA:72689	Formation of a pool of free 40S subunits	REACTOME_Pathways_20.11.2017	1.58369e-06	0.00060497	9.4939e-25	2.27854e-23	[-1]	Group25	12.6214	13	Specific for Cluster #1	[EIF3M, RPL12, RPL13, RPL7, RPL9, RPS11, RPS12, RPS20, RPS24, RPS27A]	[RPL22, RPL4, RPS18]	76.9231	23.0769	[EIF3M, RPL12, RPL13, RPL22, RPL4, RPL7, RPL9, RPS11, RPS12, RPS18, RPS20, RPS24, RPS27A]
R-HSA:72706	GTP hydrolysis and joining of the 60S ribosomal subunit	REACTOME_Pathways_20.11.2017	4.00179e-10	1.80881e-07	9.4939e-25	2.27854e-23	[-1]	Group25	15.7895	18	Specific for Cluster #1	[EIF2S1, EIF2S2, EIF3M, EIF4A1, EIF4A2, EIF4H, RPL12, RPL13, RPL7, RPL9, RPS11, RPS12, RPS20, RPS24, RPS27A]	[RPL22, RPL4, RPS18]	83.3333	16.6667	[EIF2S1, EIF2S2, EIF3M, EIF4A1, EIF4A2, EIF4H, RPL12, RPL13, RPL22, RPL4, RPL7, RPL9, RPS11, RPS12, RPS18, RPS20, RPS24, RPS27A]
R-HSA:72737	Cap-dependent Translation Initiation	REACTOME_Pathways_20.11.2017	1.08734e-09	4.8169e-07	9.4939e-25	2.27854e-23	[-1]	Group25	14.876	18	Specific for Cluster #1	[EIF2S1, EIF2S2, EIF3M, EIF4A1, EIF4A2, EIF4H, RPL12, RPL13, RPL7, RPL9, RPS11, RPS12, RPS20, RPS24, RPS27A]	[RPL22, RPL4, RPS18]	83.3333	16.6667	[EIF2S1, EIF2S2, EIF3M, EIF4A1, EIF4A2, EIF4H, RPL12, RPL13, RPL22, RPL4, RPL7, RPL9, RPS11, RPS12, RPS18, RPS20, RPS24, RPS27A]
R-HSA:72764	Eukaryotic Translation Termination	REACTOME_Pathways_20.11.2017	3.53262e-06	0.0013106	9.4939e-25	2.27854e-23	[-1]	Group25	12.766	12	Specific for Cluster #1	[RPL12, RPL13, RPL7, RPL9, RPS11, RPS12, RPS20, RPS24, RPS27A]	[RPL22, RPL4, RPS18]	75	25	[RPL12, RPL13, RPL22, RPL4, RPL7, RPL9, RPS11, RPS12, RPS18, RPS20, RPS24, RPS27A]
R-HSA:72766	Translation	REACTOME_Pathways_20.11.2017	1.06237e-09	4.71694e-07	9.4939e-25	2.27854e-23	[-1]	Group25	9.58904	28	Specific for Cluster #1	[AARS, EEF1B2, EEF1D, EEF2, EIF2S1, EIF2S2, EIF3M, EIF4A1, EIF4A2, EIF4H, FARSB, GARS, LARS, QARS, RARS, RPL12, RPL13, RPL7, RPL9, RPS11, RPS12, RPS20, RPS24, RPS27A, WARS2]	[RPL22, RPL4, RPS18]	89.2857	10.7143	[AARS, EEF1B2, EEF1D, EEF2, EIF2S1, EIF2S2, EIF3M, EIF4A1, EIF4A2, EIF4H, FARSB, GARS, LARS, QARS, RARS, RPL12, RPL13, RPL22, RPL4, RPL7, RPL9, RPS11, RPS12, RPS18, RPS20, RPS24, RPS27A, WARS2]
R-HSA:75815	Ubiquitin-dependent degradation of Cyclin D	REACTOME_Pathways_20.11.2017	6.89844e-21	4.17356e-18	9.4939e-25	2.27854e-23	[-1]	Group25	41.1765	21	None Specific Cluster	[PSMB3, PSMB6, PSMC2, PSMD13, PSMD2, PSMD4, PSME1, RPS27A, UBB]	[PSMA1, PSMA2, PSMA3, PSMA4, PSMA5, PSMA6, PSMA8, PSMB1, PSMB2, PSMB4, PSME2, UBC]	42.8571	57.1429	[PSMA1, PSMA2, PSMA3, PSMA4, PSMA5, PSMA6, PSMA8, PSMB1, PSMB2, PSMB3, PSMB4, PSMB6, PSMC2, PSMD13, PSMD2, PSMD4, PSME1, PSME2, RPS27A, UBB, UBC]
R-HSA:8852276	The role of GTSE1 in G2/M progression after G2 checkpoint	REACTOME_Pathways_20.11.2017	1.77929e-16	9.83945e-14	9.4939e-25	2.27854e-23	[-1]	Group25	26.9231	21	None Specific Cluster	[PSMB3, PSMB6, PSMC2, PSMD13, PSMD2, PSMD4, PSME1, RPS27A, UBB]	[PSMA1, PSMA2, PSMA3, PSMA4, PSMA5, PSMA6, PSMA8, PSMB1, PSMB2, PSMB4, PSME2, UBC]	42.8571	57.1429	[PSMA1, PSMA2, PSMA3, PSMA4, PSMA5, PSMA6, PSMA8, PSMB1, PSMB2, PSMB3, PSMB4, PSMB6, PSMC2, PSMD13, PSMD2, PSMD4, PSME1, PSME2, RPS27A, UBB, UBC]
R-HSA:8854050	FBXL7 down-regulates AURKA during mitotic entry and in early mitosis	REACTOME_Pathways_20.11.2017	2.9285e-20	1.7571e-17	9.4939e-25	2.27854e-23	[-1]	Group25	38.8889	21	None Specific Cluster	[PSMB3, PSMB6, PSMC2, PSMD13, PSMD2, PSMD4, PSME1, RPS27A, UBB]	[PSMA1, PSMA2, PSMA3, PSMA4, PSMA5, PSMA6, PSMA8, PSMB1, PSMB2, PSMB4, PSME2, UBC]	42.8571	57.1429	[PSMA1, PSMA2, PSMA3, PSMA4, PSMA5, PSMA6, PSMA8, PSMB1, PSMB2, PSMB3, PSMB4, PSMB6, PSMC2, PSMD13, PSMD2, PSMD4, PSME1, PSME2, RPS27A, UBB, UBC]
R-HSA:8854691	Interleukin-20 family signaling	REACTOME_Pathways_20.11.2017	1.51737e-11	7.162e-09	9.4939e-25	2.27854e-23	[-1]	Group25	11.1111	29	None Specific Cluster	[ACTG1, IQGAP1, PSMB3, PSMB6, PSMC2, PSMD13, PSMD2, PSMD4, PSME1, PTK2, RPS27A, SPTAN1, SPTBN4, UBB, YWHAB]	[ACTB, CALM1, PSMA1, PSMA2, PSMA3, PSMA4, PSMA5, PSMA6, PSMA8, PSMB1, PSMB2, PSMB4, PSME2, UBC]	51.7241	48.2759	[ACTB, ACTG1, CALM1, IQGAP1, PSMA1, PSMA2, PSMA3, PSMA4, PSMA5, PSMA6, PSMA8, PSMB1, PSMB2, PSMB3, PSMB4, PSMB6, PSMC2, PSMD13, PSMD2, PSMD4, PSME1, PSME2, PTK2, RPS27A, SPTAN1, SPTBN4, UBB, UBC, YWHAB]
R-HSA:8868773	rRNA processing in the nucleus and cytosol	REACTOME_Pathways_20.11.2017	3.59778e-05	0.0117647	9.4939e-25	2.27854e-23	[-1]	Group25	8.08081	16	Specific for Cluster #1	[NCL, NOP2, RPL12, RPL13, RPL7, RPL9, RPS11, RPS12, RPS20, RPS24, RPS27A, SNU13]	[BOP1, RPL22, RPL4, RPS18]	75	25	[BOP1, NCL, NOP2, RPL12, RPL13, RPL22, RPL4, RPL7, RPL9, RPS11, RPS12, RPS18, RPS20, RPS24, RPS27A, SNU13]
R-HSA:8878159	Transcriptional regulation by RUNX3	REACTOME_Pathways_20.11.2017	2.8395e-12	1.37716e-09	9.4939e-25	2.27854e-23	[-1]	Group25	18.1818	20	None Specific Cluster	[PSMB3, PSMB6, PSMC2, PSMD13, PSMD2, PSMD4, PSME1, RPS27A, UBB]	[PSMA1, PSMA2, PSMA3, PSMA4, PSMA5, PSMA6, PSMB1, PSMB2, PSMB4, PSME2, UBC]	45	55	[PSMA1, PSMA2, PSMA3, PSMA4, PSMA5, PSMA6, PSMB1, PSMB2, PSMB3, PSMB4, PSMB6, PSMC2, PSMD13, PSMD2, PSMD4, PSME1, PSME2, RPS27A, UBB, UBC]
R-HSA:8878166	Transcriptional regulation by RUNX2	REACTOME_Pathways_20.11.2017	2.06868e-12	1.01365e-09	9.4939e-25	2.27854e-23	[-1]	Group25	17.3554	21	None Specific Cluster	[PSMB3, PSMB6, PSMC2, PSMD13, PSMD2, PSMD4, PSME1, RPS27A, UBB]	[PSMA1, PSMA2, PSMA3, PSMA4, PSMA5, PSMA6, PSMA8, PSMB1, PSMB2, PSMB4, PSME2, UBC]	42.8571	57.1429	[PSMA1, PSMA2, PSMA3, PSMA4, PSMA5, PSMA6, PSMA8, PSMB1, PSMB2, PSMB3, PSMB4, PSMB6, PSMC2, PSMD13, PSMD2, PSMD4, PSME1, PSME2, RPS27A, UBB, UBC]
R-HSA:8878171	Transcriptional regulation by RUNX1	REACTOME_Pathways_20.11.2017	2.79528e-10	1.27465e-07	9.4939e-25	2.27854e-23	[-1]	Group25	10.8787	26	None Specific Cluster	[AGO1, AGO3, PSMB3, PSMB6, PSMC2, PSMD13, PSMD2, PSMD4, PSME1, RPS27A, UBB]	[AGO2, HIST1H4K, HIST2H3D, PSMA1, PSMA2, PSMA3, PSMA4, PSMA5, PSMA6, PSMA8, PSMB1, PSMB2, PSMB4, PSME2, UBC]	42.3077	57.6923	[AGO1, AGO2, AGO3, HIST1H4K, HIST2H3D, PSMA1, PSMA2, PSMA3, PSMA4, PSMA5, PSMA6, PSMA8, PSMB1, PSMB2, PSMB3, PSMB4, PSMB6, PSMC2, PSMD13, PSMD2, PSMD4, PSME1, PSME2, RPS27A, UBB, UBC]
R-HSA:8939236	RUNX1 regulates transcription of genes involved in differentiation of HSCs	REACTOME_Pathways_20.11.2017	1.18262e-13	6.04319e-11	9.4939e-25	2.27854e-23	[-1]	Group25	17.6923	23	Specific for Cluster #2	[PSMB3, PSMB6, PSMC2, PSMD13, PSMD2, PSMD4, PSME1, RPS27A, UBB]	[HIST1H4K, HIST2H3D, PSMA1, PSMA2, PSMA3, PSMA4, PSMA5, PSMA6, PSMA8, PSMB1, PSMB2, PSMB4, PSME2, UBC]	39.1304	60.8696	[HIST1H4K, HIST2H3D, PSMA1, PSMA2, PSMA3, PSMA4, PSMA5, PSMA6, PSMA8, PSMB1, PSMB2, PSMB3, PSMB4, PSMB6, PSMC2, PSMD13, PSMD2, PSMD4, PSME1, PSME2, RPS27A, UBB, UBC]
R-HSA:8939902	Regulation of RUNX2 expression and activity	REACTOME_Pathways_20.11.2017	3.95585e-17	2.23505e-14	9.4939e-25	2.27854e-23	[-1]	Group25	28.7671	21	None Specific Cluster	[PSMB3, PSMB6, PSMC2, PSMD13, PSMD2, PSMD4, PSME1, RPS27A, UBB]	[PSMA1, PSMA2, PSMA3, PSMA4, PSMA5, PSMA6, PSMA8, PSMB1, PSMB2, PSMB4, PSME2, UBC]	42.8571	57.1429	[PSMA1, PSMA2, PSMA3, PSMA4, PSMA5, PSMA6, PSMA8, PSMB1, PSMB2, PSMB3, PSMB4, PSMB6, PSMC2, PSMD13, PSMD2, PSMD4, PSME1, PSME2, RPS27A, UBB, UBC]
R-HSA:8941858	Regulation of RUNX3 expression and activity	REACTOME_Pathways_20.11.2017	1.14559e-18	6.72462e-16	9.4939e-25	2.27854e-23	[-1]	Group25	36.3636	20	None Specific Cluster	[PSMB3, PSMB6, PSMC2, PSMD13, PSMD2, PSMD4, PSME1, RPS27A, UBB]	[PSMA1, PSMA2, PSMA3, PSMA4, PSMA5, PSMA6, PSMB1, PSMB2, PSMB4, PSME2, UBC]	45	55	[PSMA1, PSMA2, PSMA3, PSMA4, PSMA5, PSMA6, PSMB1, PSMB2, PSMB3, PSMB4, PSMB6, PSMC2, PSMD13, PSMD2, PSMD4, PSME1, PSME2, RPS27A, UBB, UBC]
R-HSA:8948751	Regulation of PTEN stability and activity	REACTOME_Pathways_20.11.2017	5.69213e-19	3.35836e-16	9.4939e-25	2.27854e-23	[-1]	Group25	31.8841	22	None Specific Cluster	[FRK, PSMB3, PSMB6, PSMC2, PSMD13, PSMD2, PSMD4, PSME1, RPS27A, UBB]	[PSMA1, PSMA2, PSMA3, PSMA4, PSMA5, PSMA6, PSMA8, PSMB1, PSMB2, PSMB4, PSME2, UBC]	45.4545	54.5455	[FRK, PSMA1, PSMA2, PSMA3, PSMA4, PSMA5, PSMA6, PSMA8, PSMB1, PSMB2, PSMB3, PSMB4, PSMB6, PSMC2, PSMD13, PSMD2, PSMD4, PSME1, PSME2, RPS27A, UBB, UBC]
R-HSA:8951664	Neddylation	REACTOME_Pathways_20.11.2017	9.92227e-10	4.41541e-07	9.4939e-25	2.27854e-23	[-1]	Group25	10.6383	25	None Specific Cluster	[COPS7A, DDB1, FBXW8, PSMB3, PSMB6, PSMC2, PSMD13, PSMD2, PSMD4, PSME1, RPS27A, UBB]	[HIF3A, PSMA1, PSMA2, PSMA3, PSMA4, PSMA5, PSMA6, PSMA8, PSMB1, PSMB2, PSMB4, PSME2, UBC]	48	52	[COPS7A, DDB1, FBXW8, HIF3A, PSMA1, PSMA2, PSMA3, PSMA4, PSMA5, PSMA6, PSMA8, PSMB1, PSMB2, PSMB3, PSMB4, PSMB6, PSMC2, PSMD13, PSMD2, PSMD4, PSME1, PSME2, RPS27A, UBB, UBC]
R-HSA:8953854	Metabolism of RNA	REACTOME_Pathways_20.11.2017	2.86212e-23	1.76879e-20	9.4939e-25	2.27854e-23	[-1]	Group25	10.0443	68	None Specific Cluster	[ALYREF, DHX15, EIF4A1, EIF4A2, HNRNPK, HNRNPL, HNRNPR, HNRNPUL1, HSPA1A, KHSRP, NCBP1, NCL, NOP2, PSMB3, PSMB6, PSMC2, PSMD13, PSMD2, PSMD4, PSME1, RBM8A, RBMX, RPL12, RPL13, RPL7, RPL9, RPS11, RPS12, RPS20, RPS24, RPS27A, SNRNP200, SNRPG, SNU13, SNURF, SRSF3, SRSF6, UBB, WBP4, YWHAB]	[BOP1, HNRNPA1, HSPA8, LSM1, LSM4, NUP210, PATL1, PSMA1, PSMA2, PSMA3, PSMA4, PSMA5, PSMA6, PSMA8, PSMB1, PSMB2, PSMB4, PSME2, RAN, RPL22, RPL4, RPS18, SNRPD3, SRSF1, SRSF2, SRSF4, UBC, YWHAZ]	58.8235	41.1765	[ALYREF, BOP1, DHX15, EIF4A1, EIF4A2, HNRNPA1, HNRNPK, HNRNPL, HNRNPR, HNRNPUL1, HSPA1A, HSPA8, KHSRP, LSM1, LSM4, NCBP1, NCL, NOP2, NUP210, PATL1, PSMA1, PSMA2, PSMA3, PSMA4, PSMA5, PSMA6, PSMA8, PSMB1, PSMB2, PSMB3, PSMB4, PSMB6, PSMC2, PSMD13, PSMD2, PSMD4, PSME1, PSME2, RAN, RBM8A, RBMX, RPL12, RPL13, RPL22, RPL4, RPL7, RPL9, RPS11, RPS12, RPS18, RPS20, RPS24, RPS27A, SNRNP200, SNRPD3, SNRPG,…
R-HSA:8953897	Cellular responses to external stimuli	REACTOME_Pathways_20.11.2017	2.84842e-18	1.65778e-15	9.4939e-25	2.27854e-23	[-1]	Group25	10.2362	52	None Specific Cluster	[AGO1, AGO3, CAT, CCNE1, DYNC1H1, GPX2, HSPA1A, HSPA2, HSPA4, HSPA9, P4HB, PRDX1, PRDX3, PRDX6, PRKAG3, PSMB3, PSMB6, PSMC2, PSMD13, PSMD2, PSMD4, PSME1, RPS27A, TNIK, TSC2, UBB]	[CAPZB, GPX1, HIF3A, HIST1H4K, HIST2H3D, HSPA1L, HSPA5, HSPA6, HSPA8, NUP210, PSMA1, PSMA2, PSMA3, PSMA4, PSMA5, PSMA6, PSMA8, PSMB1, PSMB2, PSMB4, PSME2, SOD1, TXN, UBC, VCP, YWHAE]	50	50	[AGO1, AGO3, CAPZB, CAT, CCNE1, DYNC1H1, GPX1, GPX2, HIF3A, HIST1H4K, HIST2H3D, HSPA1A, HSPA1L, HSPA2, HSPA4, HSPA5, HSPA6, HSPA8, HSPA9, NUP210, P4HB, PRDX1, PRDX3, PRDX6, PRKAG3, PSMA1, PSMA2, PSMA3, PSMA4, PSMA5, PSMA6, PSMA8, PSMB1, PSMB2, PSMB3, PSMB4, PSMB6, PSMC2, PSMD13, PSMD2, PSMD4, PSME1, PSME2, RPS27A, SOD1, TNIK, TSC2, TXN, UBB, UBC, VCP, YWHAE]
R-HSA:9006925	Intracellular signaling by second messengers	REACTOME_Pathways_20.11.2017	7.76043e-10	3.46891e-07	9.4939e-25	2.27854e-23	[-1]	Group25	9.72222	28	None Specific Cluster	[AGO1, AGO3, FRK, PHLPP2, PSMB3, PSMB6, PSMC2, PSMD13, PSMD2, PSMD4, PSME1, RPS27A, TSC2, UBB]	[AGO2, CALM1, PSMA1, PSMA2, PSMA3, PSMA4, PSMA5, PSMA6, PSMA8, PSMB1, PSMB2, PSMB4, PSME2, UBC]	50	50	[AGO1, AGO2, AGO3, CALM1, FRK, PHLPP2, PSMA1, PSMA2, PSMA3, PSMA4, PSMA5, PSMA6, PSMA8, PSMB1, PSMB2, PSMB3, PSMB4, PSMB6, PSMC2, PSMD13, PSMD2, PSMD4, PSME1, PSME2, RPS27A, TSC2, UBB, UBC]
R-HSA:9010553	Regulation of expression of SLITs and ROBOs	REACTOME_Pathways_20.11.2017	3.34069e-21	2.03114e-18	9.4939e-25	2.27854e-23	[-1]	Group25	19.7674	34	None Specific Cluster	[NCBP1, PSMB3, PSMB6, PSMC2, PSMD13, PSMD2, PSMD4, PSME1, RBM8A, RPL12, RPL13, RPL7, RPL9, RPS11, RPS12, RPS20, RPS24, RPS27A, UBB]	[PSMA1, PSMA2, PSMA3, PSMA4, PSMA5, PSMA6, PSMA8, PSMB1, PSMB2, PSMB4, PSME2, RPL22, RPL4, RPS18, UBC]	55.8824	44.1176	[NCBP1, PSMA1, PSMA2, PSMA3, PSMA4, PSMA5, PSMA6, PSMA8, PSMB1, PSMB2, PSMB3, PSMB4, PSMB6, PSMC2, PSMD13, PSMD2, PSMD4, PSME1, PSME2, RBM8A, RPL12, RPL13, RPL22, RPL4, RPL7, RPL9, RPS11, RPS12, RPS18, RPS20, RPS24, RPS27A, UBB, UBC]
R-HSA:927802	Nonsense-Mediated Decay (NMD)	REACTOME_Pathways_20.11.2017	1.09256e-06	0.000419544	9.4939e-25	2.27854e-23	[-1]	Group25	12.069	14	Specific for Cluster #1	[NCBP1, RBM8A, RPL12, RPL13, RPL7, RPL9, RPS11, RPS12, RPS20, RPS24, RPS27A]	[RPL22, RPL4, RPS18]	78.5714	21.4286	[NCBP1, RBM8A, RPL12, RPL13, RPL22, RPL4, RPL7, RPL9, RPS11, RPS12, RPS18, RPS20, RPS24, RPS27A]
R-HSA:975956	Nonsense Mediated Decay (NMD) independent of the Exon Junction Complex (EJC)	REACTOME_Pathways_20.11.2017	6.98855e-07	0.000270457	9.4939e-25	2.27854e-23	[-1]	Group25	13.5417	13	Specific for Cluster #1	[NCBP1, RPL12, RPL13, RPL7, RPL9, RPS11, RPS12, RPS20, RPS24, RPS27A]	[RPL22, RPL4, RPS18]	76.9231	23.0769	[NCBP1, RPL12, RPL13, RPL22, RPL4, RPL7, RPL9, RPS11, RPS12, RPS18, RPS20, RPS24, RPS27A]
R-HSA:975957	Nonsense Mediated Decay (NMD) enhanced by the Exon Junction Complex (EJC)	REACTOME_Pathways_20.11.2017	1.09256e-06	0.000419544	9.4939e-25	2.27854e-23	[-1]	Group25	12.069	14	Specific for Cluster #1	[NCBP1, RBM8A, RPL12, RPL13, RPL7, RPL9, RPS11, RPS12, RPS20, RPS24, RPS27A]	[RPL22, RPL4, RPS18]	78.5714	21.4286	[NCBP1, RBM8A, RPL12, RPL13, RPL22, RPL4, RPL7, RPL9, RPS11, RPS12, RPS18, RPS20, RPS24, RPS27A]
R-HSA:983168	Antigen processing: Ubiquitination & Proteasome degradation	REACTOME_Pathways_20.11.2017	4.07279e-09	1.7513e-06	9.4939e-25	2.27854e-23	[-1]	Group25	9.03226	28	None Specific Cluster	[FBXW8, HUWE1, NPEPPS, PSMB3, PSMB6, PSMC2, PSMD13, PSMD2, PSMD4, PSME1, RPS27A, TRIM21, UBB, UBE2L3, UBE2V1]	[PSMA1, PSMA2, PSMA3, PSMA4, PSMA5, PSMA6, PSMA8, PSMB1, PSMB2, PSMB4, PSME2, UBC, UBR2]	53.5714	46.4286	[FBXW8, HUWE1, NPEPPS, PSMA1, PSMA2, PSMA3, PSMA4, PSMA5, PSMA6, PSMA8, PSMB1, PSMB2, PSMB3, PSMB4, PSMB6, PSMC2, PSMD13, PSMD2, PSMD4, PSME1, PSME2, RPS27A, TRIM21, UBB, UBC, UBE2L3, UBE2V1, UBR2]
R-HSA:983169	Class I MHC mediated antigen processing & presentation	REACTOME_Pathways_20.11.2017	4.401e-09	1.88363e-06	9.4939e-25	2.27854e-23	[-1]	Group25	8.31099	31	None Specific Cluster	[FBXW8, HUWE1, MRC2, NPEPPS, PSMB3, PSMB6, PSMC2, PSMD13, PSMD2, PSMD4, PSME1, RPS27A, TRIM21, UBB, UBE2L3, UBE2V1]	[HLA-A, HSPA5, PSMA1, PSMA2, PSMA3, PSMA4, PSMA5, PSMA6, PSMA8, PSMB1, PSMB2, PSMB4, PSME2, UBC, UBR2]	51.6129	48.3871	[FBXW8, HLA-A, HSPA5, HUWE1, MRC2, NPEPPS, PSMA1, PSMA2, PSMA3, PSMA4, PSMA5, PSMA6, PSMA8, PSMB1, PSMB2, PSMB3, PSMB4, PSMB6, PSMC2, PSMD13, PSMD2, PSMD4, PSME1, PSME2, RPS27A, TRIM21, UBB, UBC, UBE2L3, UBE2V1, UBR2]
R-HSA:983705	Signaling by the B Cell Receptor (BCR)	REACTOME_Pathways_20.11.2017	1.59135e-13	8.06817e-11	9.4939e-25	2.27854e-23	[-1]	Group25	18.4874	22	None Specific Cluster	[PSMB3, PSMB6, PSMC2, PSMD13, PSMD2, PSMD4, PSME1, RPS27A, UBB]	[CALM1, PSMA1, PSMA2, PSMA3, PSMA4, PSMA5, PSMA6, PSMA8, PSMB1, PSMB2, PSMB4, PSME2, UBC]	40.9091	59.0909	[CALM1, PSMA1, PSMA2, PSMA3, PSMA4, PSMA5, PSMA6, PSMA8, PSMB1, PSMB2, PSMB3, PSMB4, PSMB6, PSMC2, PSMD13, PSMD2, PSMD4, PSME1, PSME2, RPS27A, UBB, UBC]
WP:183	Proteasome Degradation	WikiPathways_20.11.2017	1.77986e-17	1.01808e-14	9.4939e-25	2.27854e-23	[-1]	Group25	32.2581	20	Specific for Cluster #2	[PSMB3, PSMB6, PSMC2, PSMD13, PSMD2, PSMD4, PSME1, UBB]	[HLA-A, PSMA1, PSMA2, PSMA3, PSMA4, PSMA5, PSMA6, PSMB1, PSMB2, PSMB4, PSME2, UBC]	40	60	[HLA-A, PSMA1, PSMA2, PSMA3, PSMA4, PSMA5, PSMA6, PSMB1, PSMB2, PSMB3, PSMB4, PSMB6, PSMC2, PSMD13, PSMD2, PSMD4, PSME1, PSME2, UBB, UBC]
WP:477	Cytoplasmic Ribosomal Proteins	WikiPathways_20.11.2017	1.96364e-06	0.000740292	9.4939e-25	2.27854e-23	[-1]	Group25	13.4831	12	Specific for Cluster #1	[RPL12, RPL13, RPL7, RPL9, RPS11, RPS12, RPS20, RPS24, RPS27A]	[RPL22, RPL4, RPS18]	75	25	[RPL12, RPL13, RPL22, RPL4, RPL7, RPL9, RPS11, RPS12, RPS18, RPS20, RPS24, RPS27A]
GO:1904668	positive regulation of ubiquitin protein ligase activity	GO_BiologicalProcess-EBI-QuickGO-GOA_20.11.2017_00h00	1.45746e-16	8.08892e-14	9.4939e-25	2.27854e-23	[7, 9, 10, 11, 12, 13]	Group25	25.2874	22	None Specific Cluster	[PSMB3, PSMB6, PSMC2, PSMD13, PSMD2, PSMD4, PSME1, RAB1A, RPS27A, UBB]	[PSMA1, PSMA2, PSMA3, PSMA4, PSMA5, PSMA6, PSMA8, PSMB1, PSMB2, PSMB4, PSME2, UBC]	45.4545	54.5455	[PSMA1, PSMA2, PSMA3, PSMA4, PSMA5, PSMA6, PSMA8, PSMB1, PSMB2, PSMB3, PSMB4, PSMB6, PSMC2, PSMD13, PSMD2, PSMD4, PSME1, PSME2, RAB1A, RPS27A, UBB, UBC]
GO:0022613	ribonucleoprotein complex biogenesis	GO_BiologicalProcess-EBI-QuickGO-GOA_20.11.2017_00h00	2.69295e-08	1.11488e-05	9.4939e-25	2.27854e-23	[3]	Group25	7.08502	35	Specific for Cluster #1	[AGO1, AGO3, CIRBP, DYNC1H1, EIF2S1, EIF4H, MMAB, NCBP1, NOP2, RBMX, RPL12, RPL13, RPL7, RPL9, RPS11, RPS12, RPS20, RPS24, RPS27A, RSL1D1, SART3, SNRNP200, SNRPG, SNU13, SRSF6]	[AGO2, BOP1, LSM4, PATL1, RAN, RPL22, RPL4, RPS18, SNRPD3, SRSF1]	71.4286	28.5714	[AGO1, AGO2, AGO3, BOP1, CIRBP, DYNC1H1, EIF2S1, EIF4H, LSM4, MMAB, NCBP1, NOP2, PATL1, RAN, RBMX, RPL12, RPL13, RPL22, RPL4, RPL7, RPL9, RPS11, RPS12, RPS18, RPS20, RPS24, RPS27A, RSL1D1, SART3, SNRNP200, SNRPD3, SNRPG, SNU13, SRSF1, SRSF6]
GO:0042180	cellular ketone metabolic process	GO_BiologicalProcess-EBI-QuickGO-GOA_20.11.2017_00h00	1.65743e-06	0.00063148	9.4939e-25	2.27854e-23	[3]	Group25	8.23529	21	None Specific Cluster	[GLO1, KYAT3, PSMB3, PSMB6, PSMC2, PSMD13, PSMD2, PSMD4, PSME1]	[FABP3, PSMA1, PSMA2, PSMA3, PSMA4, PSMA5, PSMA6, PSMA8, PSMB1, PSMB2, PSMB4, PSME2]	42.8571	57.1429	[FABP3, GLO1, KYAT3, PSMA1, PSMA2, PSMA3, PSMA4, PSMA5, PSMA6, PSMA8, PSMB1, PSMB2, PSMB3, PSMB4, PSMB6, PSMC2, PSMD13, PSMD2, PSMD4, PSME1, PSME2]
GO:0044403	symbiosis, encompassing mutualism through parasitism	GO_BiologicalProcess-EBI-QuickGO-GOA_20.11.2017_00h00	2.09039e-17	1.19152e-14	9.4939e-25	2.27854e-23	[3]	Group25	7.75281	69	Specific for Cluster #1	[ALYREF, AP2S1, AQP1, CASP8, CBX5, COPB1, DDB1, EIF4A1, EIF4A2, EIF4H, HNRNPK, HSPA1A, IL16, ILF3, KPNA4, LARP1, MPDZ, MX1, P4HB, PSMB3, PSMB6, PSMC2, RAB1A, RACK1, RAD23A, RANBP1, RPL12, RPL13, RPL7, RPL9, RPS11, RPS12, RPS20, RPS24, RPS27A, SQSTM1, TARDBP, TOP1, TRIM21, TRIM35, TSC2, UBB, VDAC1, YWHAB]	[BANF1, CD209, FADD, GAPDH, GPX1, HLA-A, HNRNPA1, HSPA8, LGALS1, NUP210, PSMA3, PSMA4, PSMB1, PSMB2, PSMB4, RAB1B, RAB7A, RAN, RPL22, RPL4, RPS18, TRIM62, UBC, VCP, YWHAE]	63.7681	36.2319	[ALYREF, AP2S1, AQP1, BANF1, CASP8, CBX5, CD209, COPB1, DDB1, EIF4A1, EIF4A2, EIF4H, FADD, GAPDH, GPX1, HLA-A, HNRNPA1, HNRNPK, HSPA1A, HSPA8, IL16, ILF3, KPNA4, LARP1, LGALS1, MPDZ, MX1, NUP210, P4HB, PSMA3, PSMA4, PSMB1, PSMB2, PSMB3, PSMB4, PSMB6, PSMC2, RAB1A, RAB1B, RAB7A, RACK1, RAD23A, RAN, RANBP1, RPL12, RPL13, RPL22, RPL4, RPL7, RPL9, RPS11, RPS12, RPS18, RPS20, RPS24, RPS27A, SQSTM1, TA…
GO:0048002	antigen processing and presentation of peptide antigen	GO_BiologicalProcess-EBI-QuickGO-GOA_20.11.2017_00h00	1.43724e-15	7.74673e-13	9.4939e-25	2.27854e-23	[3]	Group25	15.2284	30	None Specific Cluster	[ACTR1B, AP2S1, CLTA, DNM2, DYNC1H1, KIF15, PSMB3, PSMB6, PSMC2, PSMD13, PSMD2, PSMD4, PSME1, PYCARD]	[CAPZB, CD209, CLTC, HLA-A, PSMA1, PSMA2, PSMA3, PSMA4, PSMA5, PSMA6, PSMA8, PSMB1, PSMB2, PSMB4, PSME2, RAB7A]	46.6667	53.3333	[ACTR1B, AP2S1, CAPZB, CD209, CLTA, CLTC, DNM2, DYNC1H1, HLA-A, KIF15, PSMA1, PSMA2, PSMA3, PSMA4, PSMA5, PSMA6, PSMA8, PSMB1, PSMB2, PSMB3, PSMB4, PSMB6, PSMC2, PSMD13, PSMD2, PSMD4, PSME1, PSME2, PYCARD, RAB7A]
GO:0070482	response to oxygen levels	GO_BiologicalProcess-EBI-QuickGO-GOA_20.11.2017_00h00	8.99147e-13	4.43279e-10	9.4939e-25	2.27854e-23	[3]	Group25	9.62025	38	None Specific Cluster	[ACAA2, AQP1, ATP1B1, ATP6V1A, CAT, HP1BP3, LMNA, NOS1, NPEPPS, P4HB, PHB2, PSMB3, PSMB6, PSMC2, PSMD13, PSMD2, PSMD4, PSME1, PTGIS, RPS27A, UBB, USP19]	[ACTN4, ADSL, ALAD, HIF3A, PSMA1, PSMA2, PSMA3, PSMA4, PSMA5, PSMA6, PSMA8, PSMB1, PSMB2, PSMB4, PSME2, UBC]	57.8947	42.1053	[ACAA2, ACTN4, ADSL, ALAD, AQP1, ATP1B1, ATP6V1A, CAT, HIF3A, HP1BP3, LMNA, NOS1, NPEPPS, P4HB, PHB2, PSMA1, PSMA2, PSMA3, PSMA4, PSMA5, PSMA6, PSMA8, PSMB1, PSMB2, PSMB3, PSMB4, PSMB6, PSMC2, PSMD13, PSMD2, PSMD4, PSME1, PSME2, PTGIS, RPS27A, UBB, UBC, USP19]
GO:0002366	leukocyte activation involved in immune response	GO_BiologicalProcess-EBI-QuickGO-GOA_20.11.2017_00h00	3.56876e-08	1.46676e-05	9.4939e-25	2.27854e-23	[3, 4]	Group25	6.06469	45	Specific for Cluster #1	[ACTR1B, CAT, COPB1, DBNL, DLC1, DYNC1H1, EEF2, FRK, GDI2, HSPA1A, HUWE1, ILF2, IQGAP1, MGST1, MYDGF, NIT2, PRDX4, PRDX6, PRSS3, PSMC2, PSMD13, PSMD2, PYCARD, RAB5B, RAB5C, RIF1, SERPINB1, SERPINB6, SPTAN1, STAT6]	[ALAD, CDH17, FTH1, HLA-A, HSPA6, HSPA8, LGALS1, NME2, PGAM1, PSMA2, PSMA5, PSMB1, RAB7A, RAP2B, VCP]	66.6667	33.3333	[ACTR1B, ALAD, CAT, CDH17, COPB1, DBNL, DLC1, DYNC1H1, EEF2, FRK, FTH1, GDI2, HLA-A, HSPA1A, HSPA6, HSPA8, HUWE1, ILF2, IQGAP1, LGALS1, MGST1, MYDGF, NIT2, NME2, PGAM1, PRDX4, PRDX6, PRSS3, PSMA2, PSMA5, PSMB1, PSMC2, PSMD13, PSMD2, PYCARD, RAB5B, RAB5C, RAB7A, RAP2B, RIF1, SERPINB1, SERPINB6, SPTAN1, STAT6, VCP]
GO:0001666	response to hypoxia	GO_BiologicalProcess-EBI-QuickGO-GOA_20.11.2017_00h00	3.13245e-13	1.56936e-10	9.4939e-25	2.27854e-23	[3, 5]	Group25	10.1928	37	None Specific Cluster	[ACAA2, AQP1, ATP1B1, CAT, HP1BP3, LMNA, NOS1, NPEPPS, P4HB, PHB2, PSMB3, PSMB6, PSMC2, PSMD13, PSMD2, PSMD4, PSME1, PTGIS, RPS27A, UBB, USP19]	[ACTN4, ADSL, ALAD, HIF3A, PSMA1, PSMA2, PSMA3, PSMA4, PSMA5, PSMA6, PSMA8, PSMB1, PSMB2, PSMB4, PSME2, UBC]	56.7568	43.2432	[ACAA2, ACTN4, ADSL, ALAD, AQP1, ATP1B1, CAT, HIF3A, HP1BP3, LMNA, NOS1, NPEPPS, P4HB, PHB2, PSMA1, PSMA2, PSMA3, PSMA4, PSMA5, PSMA6, PSMA8, PSMB1, PSMB2, PSMB3, PSMB4, PSMB6, PSMC2, PSMD13, PSMD2, PSMD4, PSME1, PSME2, PTGIS, RPS27A, UBB, UBC, USP19]
GO:0002478	antigen processing and presentation of exogenous peptide antigen	GO_BiologicalProcess-EBI-QuickGO-GOA_20.11.2017_00h00	1.32266e-14	6.90429e-12	9.4939e-25	2.27854e-23	[4]	Group25	15.2174	28	None Specific Cluster	[ACTR1B, AP2S1, CLTA, DNM2, DYNC1H1, KIF15, PSMB3, PSMB6, PSMC2, PSMD13, PSMD2, PSMD4, PSME1]	[CAPZB, CLTC, HLA-A, PSMA1, PSMA2, PSMA3, PSMA4, PSMA5, PSMA6, PSMA8, PSMB1, PSMB2, PSMB4, PSME2, RAB7A]	46.4286	53.5714	[ACTR1B, AP2S1, CAPZB, CLTA, CLTC, DNM2, DYNC1H1, HLA-A, KIF15, PSMA1, PSMA2, PSMA3, PSMA4, PSMA5, PSMA6, PSMA8, PSMB1, PSMB2, PSMB3, PSMB4, PSMB6, PSMC2, PSMD13, PSMD2, PSMD4, PSME1, PSME2, RAB7A]
GO:0009896	positive regulation of catabolic process	GO_BiologicalProcess-EBI-QuickGO-GOA_20.11.2017_00h00	1.08637e-11	5.16027e-09	9.4939e-25	2.27854e-23	[3, 4, 5]	Group25	8.51064	40	None Specific Cluster	[DDB1, EZR, GCLC, HNRNPR, HSPA1A, KHSRP, LARP1, PSMB3, PSMB6, PSMC2, PSMD13, PSMD2, PSMD4, PSME1, PTK2, RACK1, RAD23A, RPS27A, TRIM21, TSC2, UBB]	[ACTN3, AGO2, GAPDHS, MSN, PSMA1, PSMA2, PSMA3, PSMA4, PSMA5, PSMA6, PSMA8, PSMB1, PSMB2, PSMB4, PSME2, RAB7A, RDX, UBC, VCP]	52.5	47.5	[ACTN3, AGO2, DDB1, EZR, GAPDHS, GCLC, HNRNPR, HSPA1A, KHSRP, LARP1, MSN, PSMA1, PSMA2, PSMA3, PSMA4, PSMA5, PSMA6, PSMA8, PSMB1, PSMB2, PSMB3, PSMB4, PSMB6, PSMC2, PSMD13, PSMD2, PSMD4, PSME1, PSME2, PTK2, RAB7A, RACK1, RAD23A, RDX, RPS27A, TRIM21, TSC2, UBB, UBC, VCP]
GO:0016032	viral process	GO_BiologicalProcess-EBI-QuickGO-GOA_20.11.2017_00h00	6.73133e-17	3.77628e-14	9.4939e-25	2.27854e-23	[4]	Group25	7.92683	65	Specific for Cluster #1	[ALYREF, AP2S1, CASP8, CBX5, COPB1, DDB1, EIF4A1, EIF4A2, EIF4H, HNRNPK, HSPA1A, IL16, ILF3, KPNA4, LARP1, MPDZ, MX1, P4HB, PSMB3, PSMB6, PSMC2, RAB1A, RACK1, RAD23A, RANBP1, RPL12, RPL13, RPL7, RPL9, RPS11, RPS12, RPS20, RPS24, RPS27A, TARDBP, TOP1, TRIM21, TRIM35, TSC2, UBB, VDAC1, YWHAB]	[BANF1, CD209, FADD, HLA-A, HNRNPA1, HSPA8, LGALS1, NUP210, PSMA3, PSMA4, PSMB1, PSMB2, PSMB4, RAB1B, RAB7A, RAN, RPL22, RPL4, RPS18, TRIM62, UBC, VCP, YWHAE]	64.6154	35.3846	[ALYREF, AP2S1, BANF1, CASP8, CBX5, CD209, COPB1, DDB1, EIF4A1, EIF4A2, EIF4H, FADD, HLA-A, HNRNPA1, HNRNPK, HSPA1A, HSPA8, IL16, ILF3, KPNA4, LARP1, LGALS1, MPDZ, MX1, NUP210, P4HB, PSMA3, PSMA4, PSMB1, PSMB2, PSMB3, PSMB4, PSMB6, PSMC2, RAB1A, RAB1B, RAB7A, RACK1, RAD23A, RAN, RANBP1, RPL12, RPL13, RPL22, RPL4, RPL7, RPL9, RPS11, RPS12, RPS18, RPS20, RPS24, RPS27A, TARDBP, TOP1, TRIM21, TRIM35,…
GO:0019439	aromatic compound catabolic process	GO_BiologicalProcess-EBI-QuickGO-GOA_20.11.2017_00h00	2.64073e-22	1.62405e-19	9.4939e-25	2.27854e-23	[4]	Group25	10.5263	62	None Specific Cluster	[AGO1, AGO3, BLVRA, CIRBP, EIF4A1, EIF4A2, EPHX2, HNRNPR, HSPA1A, KHSRP, LARP1, NCBP1, NT5C2, PSMB3, PSMB6, PSMC2, PSMD13, PSMD2, PSMD4, PSME1, RACK1, RBM8A, RPL12, RPL13, RPL7, RPL9, RPS11, RPS12, RPS20, RPS24, RPS27A, SAMHD1, TARDBP, UBB, YWHAB]	[AGO2, BLVRB, GPX1, HPD, HPRT1, HSPA8, LSM1, LSM4, PATL1, PSMA1, PSMA2, PSMA3, PSMA4, PSMA5, PSMA6, PSMA8, PSMB1, PSMB2, PSMB4, PSME2, RPL22, RPL4, RPS18, TYMP, UBC, VCP, YWHAZ]	56.4516	43.5484	[AGO1, AGO2, AGO3, BLVRA, BLVRB, CIRBP, EIF4A1, EIF4A2, EPHX2, GPX1, HNRNPR, HPD, HPRT1, HSPA1A, HSPA8, KHSRP, LARP1, LSM1, LSM4, NCBP1, NT5C2, PATL1, PSMA1, PSMA2, PSMA3, PSMA4, PSMA5, PSMA6, PSMA8, PSMB1, PSMB2, PSMB3, PSMB4, PSMB6, PSMC2, PSMD13, PSMD2, PSMD4, PSME1, PSME2, RACK1, RBM8A, RPL12, RPL13, RPL22, RPL4, RPL7, RPL9, RPS11, RPS12, RPS18, RPS20, RPS24, RPS27A, SAMHD1, TARDBP, TYMP, UBB…
GO:0044270	cellular nitrogen compound catabolic process	GO_BiologicalProcess-EBI-QuickGO-GOA_20.11.2017_00h00	8.13324e-23	5.01821e-20	9.4939e-25	2.27854e-23	[4]	Group25	10.7639	62	None Specific Cluster	[AGO1, AGO3, BLVRA, CIRBP, EIF4A1, EIF4A2, HNRNPR, HSPA1A, KHSRP, LARP1, NCBP1, NT5C2, PSMB3, PSMB6, PSMC2, PSMD13, PSMD2, PSMD4, PSME1, RACK1, RBM8A, RPL12, RPL13, RPL7, RPL9, RPS11, RPS12, RPS20, RPS24, RPS27A, SAMHD1, TARDBP, UBB, VDAC2, YWHAB]	[AGO2, BLVRB, CYP3A4, GPX1, HPRT1, HSPA8, LSM1, LSM4, PATL1, PSMA1, PSMA2, PSMA3, PSMA4, PSMA5, PSMA6, PSMA8, PSMB1, PSMB2, PSMB4, PSME2, RPL22, RPL4, RPS18, TYMP, UBC, VCP, YWHAZ]	56.4516	43.5484	[AGO1, AGO2, AGO3, BLVRA, BLVRB, CIRBP, CYP3A4, EIF4A1, EIF4A2, GPX1, HNRNPR, HPRT1, HSPA1A, HSPA8, KHSRP, LARP1, LSM1, LSM4, NCBP1, NT5C2, PATL1, PSMA1, PSMA2, PSMA3, PSMA4, PSMA5, PSMA6, PSMA8, PSMB1, PSMB2, PSMB3, PSMB4, PSMB6, PSMC2, PSMD13, PSMD2, PSMD4, PSME1, PSME2, RACK1, RBM8A, RPL12, RPL13, RPL22, RPL4, RPL7, RPL9, RPS11, RPS12, RPS18, RPS20, RPS24, RPS27A, SAMHD1, TARDBP, TYMP, UBB, UB…
GO:0046700	heterocycle catabolic process	GO_BiologicalProcess-EBI-QuickGO-GOA_20.11.2017_00h00	1.75068e-21	1.06966e-18	9.4939e-25	2.27854e-23	[4]	Group25	10.4712	60	None Specific Cluster	[AGO1, AGO3, BLVRA, CIRBP, EIF4A1, EIF4A2, HNRNPR, HSPA1A, KHSRP, LARP1, NCBP1, NT5C2, PSMB3, PSMB6, PSMC2, PSMD13, PSMD2, PSMD4, PSME1, RACK1, RBM8A, RPL12, RPL13, RPL7, RPL9, RPS11, RPS12, RPS20, RPS24, RPS27A, SAMHD1, TARDBP, UBB, YWHAB]	[AGO2, BLVRB, GPX1, HPRT1, HSPA8, LSM1, LSM4, PATL1, PSMA1, PSMA2, PSMA3, PSMA4, PSMA5, PSMA6, PSMA8, PSMB1, PSMB2, PSMB4, PSME2, RPL22, RPL4, RPS18, TYMP, UBC, VCP, YWHAZ]	56.6667	43.3333	[AGO1, AGO2, AGO3, BLVRA, BLVRB, CIRBP, EIF4A1, EIF4A2, GPX1, HNRNPR, HPRT1, HSPA1A, HSPA8, KHSRP, LARP1, LSM1, LSM4, NCBP1, NT5C2, PATL1, PSMA1, PSMA2, PSMA3, PSMA4, PSMA5, PSMA6, PSMA8, PSMB1, PSMB2, PSMB3, PSMB4, PSMB6, PSMC2, PSMD13, PSMD2, PSMD4, PSME1, PSME2, RACK1, RBM8A, RPL12, RPL13, RPL22, RPL4, RPL7, RPL9, RPS11, RPS12, RPS18, RPS20, RPS24, RPS27A, SAMHD1, TARDBP, TYMP, UBB, UBC, VCP, …
GO:0048863	stem cell differentiation	GO_BiologicalProcess-EBI-QuickGO-GOA_20.11.2017_00h00	6.72648e-08	2.73095e-05	9.4939e-25	2.27854e-23	[4]	Group25	9.23695	23	None Specific Cluster	[CORO1C, OXSR1, PSMB3, PSMB6, PSMC2, PSMD13, PSMD2, PSMD4, PSME1, RPS27A, UBB]	[PSMA1, PSMA2, PSMA3, PSMA4, PSMA5, PSMA6, PSMA8, PSMB1, PSMB2, PSMB4, PSME2, UBC]	47.8261	52.1739	[CORO1C, OXSR1, PSMA1, PSMA2, PSMA3, PSMA4, PSMA5, PSMA6, PSMA8, PSMB1, PSMB2, PSMB3, PSMB4, PSMB6, PSMC2, PSMD13, PSMD2, PSMD4, PSME1, PSME2, RPS27A, UBB, UBC]
GO:0071453	cellular response to oxygen levels	GO_BiologicalProcess-EBI-QuickGO-GOA_20.11.2017_00h00	1.7634e-15	9.4518e-13	9.4939e-25	2.27854e-23	[4]	Group25	14.0351	32	None Specific Cluster	[ACAA2, AQP1, ATP6V1A, HP1BP3, LMNA, NPEPPS, P4HB, PHB2, PSMB3, PSMB6, PSMC2, PSMD13, PSMD2, PSMD4, PSME1, PTGIS, RPS27A, UBB, USP19]	[HIF3A, PSMA1, PSMA2, PSMA3, PSMA4, PSMA5, PSMA6, PSMA8, PSMB1, PSMB2, PSMB4, PSME2, UBC]	59.375	40.625	[ACAA2, AQP1, ATP6V1A, HIF3A, HP1BP3, LMNA, NPEPPS, P4HB, PHB2, PSMA1, PSMA2, PSMA3, PSMA4, PSMA5, PSMA6, PSMA8, PSMB1, PSMB2, PSMB3, PSMB4, PSMB6, PSMC2, PSMD13, PSMD2, PSMD4, PSME1, PSME2, PTGIS, RPS27A, UBB, UBC, USP19]
GO:1901361	organic cyclic compound catabolic process	GO_BiologicalProcess-EBI-QuickGO-GOA_20.11.2017_00h00	9.84317e-22	6.02402e-19	9.4939e-25	2.27854e-23	[4]	Group25	10.1124	63	None Specific Cluster	[AGO1, AGO3, BLVRA, CIRBP, EIF4A1, EIF4A2, EPHX2, HNRNPR, HSPA1A, KHSRP, LARP1, NCBP1, NT5C2, PSMB3, PSMB6, PSMC2, PSMD13, PSMD2, PSMD4, PSME1, RACK1, RBM8A, RPL12, RPL13, RPL7, RPL9, RPS11, RPS12, RPS20, RPS24, RPS27A, SAMHD1, TARDBP, UBB, YWHAB]	[AGO2, BLVRB, CYP3A4, GPX1, HPD, HPRT1, HSPA8, LSM1, LSM4, PATL1, PSMA1, PSMA2, PSMA3, PSMA4, PSMA5, PSMA6, PSMA8, PSMB1, PSMB2, PSMB4, PSME2, RPL22, RPL4, RPS18, TYMP, UBC, VCP, YWHAZ]	55.5556	44.4444	[AGO1, AGO2, AGO3, BLVRA, BLVRB, CIRBP, CYP3A4, EIF4A1, EIF4A2, EPHX2, GPX1, HNRNPR, HPD, HPRT1, HSPA1A, HSPA8, KHSRP, LARP1, LSM1, LSM4, NCBP1, NT5C2, PATL1, PSMA1, PSMA2, PSMA3, PSMA4, PSMA5, PSMA6, PSMA8, PSMB1, PSMB2, PSMB3, PSMB4, PSMB6, PSMC2, PSMD13, PSMD2, PSMD4, PSME1, PSME2, RACK1, RBM8A, RPL12, RPL13, RPL22, RPL4, RPL7, RPL9, RPS11, RPS12, RPS18, RPS20, RPS24, RPS27A, SAMHD1, TARDBP, T…
GO:0006520	cellular amino acid metabolic process	GO_BiologicalProcess-EBI-QuickGO-GOA_20.11.2017_00h00	1.51699e-13	7.7215e-11	9.4939e-25	2.27854e-23	[3, 4, 6]	Group25	9.94898	39	None Specific Cluster	[AARS, FARSB, GARS, GCLC, KYAT3, LARS, NIT2, NOS1, P4HB, PRDX4, PSMB3, PSMB6, PSMC2, PSMD13, PSMD2, PSMD4, PSME1, QARS, RARS, WARS2]	[AASDHPPT, ADSL, ADSS, GSS, HPD, MCCC1, MTAP, PSMA1, PSMA2, PSMA3, PSMA4, PSMA5, PSMA6, PSMA8, PSMB1, PSMB2, PSMB4, PSME2, SEPHS1]	51.2821	48.7179	[AARS, AASDHPPT, ADSL, ADSS, FARSB, GARS, GCLC, GSS, HPD, KYAT3, LARS, MCCC1, MTAP, NIT2, NOS1, P4HB, PRDX4, PSMA1, PSMA2, PSMA3, PSMA4, PSMA5, PSMA6, PSMA8, PSMB1, PSMB2, PSMB3, PSMB4, PSMB6, PSMC2, PSMD13, PSMD2, PSMD4, PSME1, PSME2, QARS, RARS, SEPHS1, WARS2]
GO:0006518	peptide metabolic process	GO_BiologicalProcess-EBI-QuickGO-GOA_20.11.2017_00h00	1.2046e-14	6.3121e-12	9.4939e-25	2.27854e-23	[4, 5]	Group25	7.1991	64	Specific for Cluster #1	[AARS, AGO1, AGO3, CIRBP, EEF1B2, EEF1D, EEF2, EIF2S1, EIF2S2, EIF3M, EIF4A1, EIF4A2, EIF4H, EIF5A, FARSB, G6PD, GARS, GCLC, GLO1, GSTK1, GSTM3, GSTO1, HNRNPR, ILF3, KHSRP, LARP1, LARS, NCBP1, NCL, NPEPPS, QARS, RACK1, RARS, RBM4B, RBM8A, RIDA, RPL12, RPL13, RPL7, RPL9, RPS11, RPS12, RPS20, RPS24, RPS27A, WARS2]	[ACO1, AGO2, CDK5RAP1, CNDP2, GAPDH, GPX1, GSS, GSTA3, HSPA8, MTPN, NUP210, RAN, RPL22, RPL4, RPS18, SOD1, TGFBRAP1, XPNPEP1]	71.875	28.125	[AARS, ACO1, AGO1, AGO2, AGO3, CDK5RAP1, CIRBP, CNDP2, EEF1B2, EEF1D, EEF2, EIF2S1, EIF2S2, EIF3M, EIF4A1, EIF4A2, EIF4H, EIF5A, FARSB, G6PD, GAPDH, GARS, GCLC, GLO1, GPX1, GSS, GSTA3, GSTK1, GSTM3, GSTO1, HNRNPR, HSPA8, ILF3, KHSRP, LARP1, LARS, MTPN, NCBP1, NCL, NPEPPS, NUP210, QARS, RACK1, RAN, RARS, RBM4B, RBM8A, RIDA, RPL12, RPL13, RPL22, RPL4, RPL7, RPL9, RPS11, RPS12, RPS18, RPS20, RPS24, …
GO:0010565	regulation of cellular ketone metabolic process	GO_BiologicalProcess-EBI-QuickGO-GOA_20.11.2017_00h00	1.66464e-07	6.64193e-05	9.4939e-25	2.27854e-23	[4, 5]	Group25	10.3261	19	Specific for Cluster #2	[PSMB3, PSMB6, PSMC2, PSMD13, PSMD2, PSMD4, PSME1]	[FABP3, PSMA1, PSMA2, PSMA3, PSMA4, PSMA5, PSMA6, PSMA8, PSMB1, PSMB2, PSMB4, PSME2]	36.8421	63.1579	[FABP3, PSMA1, PSMA2, PSMA3, PSMA4, PSMA5, PSMA6, PSMA8, PSMB1, PSMB2, PSMB3, PSMB4, PSMB6, PSMC2, PSMD13, PSMD2, PSMD4, PSME1, PSME2]
GO:0031329	regulation of cellular catabolic process	GO_BiologicalProcess-EBI-QuickGO-GOA_20.11.2017_00h00	3.1954e-14	1.65841e-11	9.4939e-25	2.27854e-23	[4, 5]	Group25	7.37101	60	None Specific Cluster	[ATP6V1A, CAPNS1, CIRBP, DLC1, EZR, GCLC, HNRNPR, HSPA1A, KHSRP, LARP1, LARS, MTCL1, PRKAG3, PSMB3, PSMB6, PSMC2, PSMD13, PSMD2, PSMD4, PSME1, PTK2, RAB8A, RACK1, RAD23A, RPS27A, TARDBP, TRIM21, TSC2, UBB, USP19, VDAC1, YOD1, YWHAB]	[AGO2, ALAD, ATP6V1B2, GAPDH, GAPDHS, GPX1, HSPA8, LEPR, MSN, PGAM1, PSMA1, PSMA2, PSMA3, PSMA4, PSMA5, PSMA6, PSMA8, PSMB1, PSMB2, PSMB4, PSME2, RAB1B, RAD23B, RDX, UBC, VCP, YWHAZ]	55	45	[AGO2, ALAD, ATP6V1A, ATP6V1B2, CAPNS1, CIRBP, DLC1, EZR, GAPDH, GAPDHS, GCLC, GPX1, HNRNPR, HSPA1A, HSPA8, KHSRP, LARP1, LARS, LEPR, MSN, MTCL1, PGAM1, PRKAG3, PSMA1, PSMA2, PSMA3, PSMA4, PSMA5, PSMA6, PSMA8, PSMB1, PSMB2, PSMB3, PSMB4, PSMB6, PSMC2, PSMD13, PSMD2, PSMD4, PSME1, PSME2, PTK2, RAB1B, RAB8A, RACK1, RAD23A, RAD23B, RDX, RPS27A, TARDBP, TRIM21, TSC2, UBB, UBC, USP19, VCP, VDAC1, YOD1…
GO:0034248	regulation of cellular amide metabolic process	GO_BiologicalProcess-EBI-QuickGO-GOA_20.11.2017_00h00	9.53274e-06	0.00335552	9.4939e-25	2.27854e-23	[4, 5]	Group25	6.18102	28	Specific for Cluster #1	[AGO1, AGO3, CIRBP, EEF2, EIF2S1, EIF4A2, EIF4H, EIF5A, GARS, HNRNPR, ILF3, KHSRP, LARP1, NCBP1, NCL, RACK1, RBM4B, RBM8A, RIDA]	[ACO1, AGO2, CDK5RAP1, GAPDH, MTPN, NUP210, PGAM1, RAN, TGFBRAP1]	67.8571	32.1429	[ACO1, AGO1, AGO2, AGO3, CDK5RAP1, CIRBP, EEF2, EIF2S1, EIF4A2, EIF4H, EIF5A, GAPDH, GARS, HNRNPR, ILF3, KHSRP, LARP1, MTPN, NCBP1, NCL, NUP210, PGAM1, RACK1, RAN, RBM4B, RBM8A, RIDA, TGFBRAP1]
GO:0034655	nucleobase-containing compound catabolic process	GO_BiologicalProcess-EBI-QuickGO-GOA_20.11.2017_00h00	7.48236e-22	4.59417e-19	9.4939e-25	2.27854e-23	[4, 5]	Group25	11.0057	58	None Specific Cluster	[AGO1, AGO3, CIRBP, EIF4A1, EIF4A2, HNRNPR, HSPA1A, KHSRP, LARP1, NCBP1, NT5C2, PSMB3, PSMB6, PSMC2, PSMD13, PSMD2, PSMD4, PSME1, RACK1, RBM8A, RPL12, RPL13, RPL7, RPL9, RPS11, RPS12, RPS20, RPS24, RPS27A, SAMHD1, TARDBP, UBB, YWHAB]	[AGO2, GPX1, HPRT1, HSPA8, LSM1, LSM4, PATL1, PSMA1, PSMA2, PSMA3, PSMA4, PSMA5, PSMA6, PSMA8, PSMB1, PSMB2, PSMB4, PSME2, RPL22, RPL4, RPS18, TYMP, UBC, VCP, YWHAZ]	56.8966	43.1034	[AGO1, AGO2, AGO3, CIRBP, EIF4A1, EIF4A2, GPX1, HNRNPR, HPRT1, HSPA1A, HSPA8, KHSRP, LARP1, LSM1, LSM4, NCBP1, NT5C2, PATL1, PSMA1, PSMA2, PSMA3, PSMA4, PSMA5, PSMA6, PSMA8, PSMB1, PSMB2, PSMB3, PSMB4, PSMB6, PSMC2, PSMD13, PSMD2, PSMD4, PSME1, PSME2, RACK1, RBM8A, RPL12, RPL13, RPL22, RPL4, RPL7, RPL9, RPS11, RPS12, RPS18, RPS20, RPS24, RPS27A, SAMHD1, TARDBP, TYMP, UBB, UBC, VCP, YWHAB, YWHAZ]
GO:0044265	cellular macromolecule catabolic process	GO_BiologicalProcess-EBI-QuickGO-GOA_20.11.2017_00h00	8.29417e-19	4.87697e-16	9.4939e-25	2.27854e-23	[4, 5]	Group25	7.2973	81	None Specific Cluster	[AGO1, AGO3, AP2S1, CASP8, CD2AP, CIRBP, CLTA, DDB1, EIF4A1, EIF4A2, EZR, GCLC, HNRNPR, HSPA1A, HUWE1, KHSRP, LARP1, NCBP1, NPLOC4, PLAA, PSMB3, PSMB6, PSMC2, PSMD13, PSMD2, PSMD4, PSME1, PTK2, RACK1, RAD23A, RANBP1, RBM8A, RPL12, RPL13, RPL7, RPL9, RPS11, RPS12, RPS20, RPS24, RPS27A, SQSTM1, TARDBP, UBB, UBE2L3, USP19, YOD1, YWHAB]	[AGO2, ALAD, CLTC, DNAJB12, GPX1, HSPA5, HSPA8, LSM1, LSM4, MSN, PATL1, PSMA1, PSMA2, PSMA3, PSMA4, PSMA5, PSMA6, PSMA8, PSMB1, PSMB2, PSMB4, PSME2, RAB7A, RAD23B, RDX, RPL22, RPL4, RPS18, UBC, UBR2, VCP, WFS1, YWHAZ]	59.2593	40.7407	[AGO1, AGO2, AGO3, ALAD, AP2S1, CASP8, CD2AP, CIRBP, CLTA, CLTC, DDB1, DNAJB12, EIF4A1, EIF4A2, EZR, GCLC, GPX1, HNRNPR, HSPA1A, HSPA5, HSPA8, HUWE1, KHSRP, LARP1, LSM1, LSM4, MSN, NCBP1, NPLOC4, PATL1, PLAA, PSMA1, PSMA2, PSMA3, PSMA4, PSMA5, PSMA6, PSMA8, PSMB1, PSMB2, PSMB3, PSMB4, PSMB6, PSMC2, PSMD13, PSMD2, PSMD4, PSME1, PSME2, PTK2, RAB7A, RACK1, RAD23A, RAD23B, RANBP1, RBM8A, RDX, RPL12, …
GO:0031331	positive regulation of cellular catabolic process	GO_BiologicalProcess-EBI-QuickGO-GOA_20.11.2017_00h00	1.1357e-11	5.38323e-09	9.4939e-25	2.27854e-23	[4, 5, 6]	Group25	9.04645	37	None Specific Cluster	[EZR, GCLC, HNRNPR, HSPA1A, KHSRP, LARP1, PSMB3, PSMB6, PSMC2, PSMD13, PSMD2, PSMD4, PSME1, PTK2, RACK1, RAD23A, RPS27A, TRIM21, TSC2, UBB]	[AGO2, GAPDHS, MSN, PSMA1, PSMA2, PSMA3, PSMA4, PSMA5, PSMA6, PSMA8, PSMB1, PSMB2, PSMB4, PSME2, RDX, UBC, VCP]	54.0541	45.9459	[AGO2, EZR, GAPDHS, GCLC, HNRNPR, HSPA1A, KHSRP, LARP1, MSN, PSMA1, PSMA2, PSMA3, PSMA4, PSMA5, PSMA6, PSMA8, PSMB1, PSMB2, PSMB3, PSMB4, PSMB6, PSMC2, PSMD13, PSMD2, PSMD4, PSME1, PSME2, PTK2, RACK1, RAD23A, RDX, RPS27A, TRIM21, TSC2, UBB, UBC, VCP]
GO:0033238	regulation of cellular amine metabolic process	GO_BiologicalProcess-EBI-QuickGO-GOA_20.11.2017_00h00	7.80927e-14	4.00615e-11	9.4939e-25	2.27854e-23	[4, 5, 6]	Group25	23.4568	19	Specific for Cluster #2	[PSMB3, PSMB6, PSMC2, PSMD13, PSMD2, PSMD4, PSME1]	[HPRT1, PSMA1, PSMA2, PSMA3, PSMA4, PSMA5, PSMA6, PSMA8, PSMB1, PSMB2, PSMB4, PSME2]	36.8421	63.1579	[HPRT1, PSMA1, PSMA2, PSMA3, PSMA4, PSMA5, PSMA6, PSMA8, PSMB1, PSMB2, PSMB3, PSMB4, PSMB6, PSMC2, PSMD13, PSMD2, PSMD4, PSME1, PSME2]
GO:0034612	response to tumor necrosis factor	GO_BiologicalProcess-EBI-QuickGO-GOA_20.11.2017_00h00	8.79051e-10	3.92057e-07	9.4939e-25	2.27854e-23	[5]	Group25	9.38511	29	None Specific Cluster	[CASP8, ETFB, HSPA1A, PSMB3, PSMB6, PSMC2, PSMD13, PSMD2, PSMD4, PSME1, PYCARD, RACK1, RPS27A, UBB]	[GSS, PSMA1, PSMA2, PSMA3, PSMA4, PSMA5, PSMA6, PSMA8, PSMB1, PSMB2, PSMB4, PSME2, SPHK1, TNFRSF6B, UBC]	48.2759	51.7241	[CASP8, ETFB, GSS, HSPA1A, PSMA1, PSMA2, PSMA3, PSMA4, PSMA5, PSMA6, PSMA8, PSMB1, PSMB2, PSMB3, PSMB4, PSMB6, PSMC2, PSMD13, PSMD2, PSMD4, PSME1, PSME2, PYCARD, RACK1, RPS27A, SPHK1, TNFRSF6B, UBB, UBC]
GO:0042176	regulation of protein catabolic process	GO_BiologicalProcess-EBI-QuickGO-GOA_20.11.2017_00h00	3.2553e-11	1.52023e-08	9.4939e-25	2.27854e-23	[4, 5, 6]	Group25	8.72641	37	None Specific Cluster	[DDB1, EZR, GCLC, HSPA1A, PSMB3, PSMB6, PSMC2, PSMD13, PSMD2, PSMD4, PSME1, PTK2, RACK1, RAD23A, RPS27A, UBB, USP19, YOD1]	[ALAD, GPX1, MSN, PSMA1, PSMA2, PSMA3, PSMA4, PSMA5, PSMA6, PSMA8, PSMB1, PSMB2, PSMB4, PSME2, RAB7A, RAD23B, RDX, UBC, VCP]	48.6486	51.3514	[ALAD, DDB1, EZR, GCLC, GPX1, HSPA1A, MSN, PSMA1, PSMA2, PSMA3, PSMA4, PSMA5, PSMA6, PSMA8, PSMB1, PSMB2, PSMB3, PSMB4, PSMB6, PSMC2, PSMD13, PSMD2, PSMD4, PSME1, PSME2, PTK2, RAB7A, RACK1, RAD23A, RAD23B, RDX, RPS27A, UBB, UBC, USP19, VCP, YOD1]
GO:0043604	amide biosynthetic process	GO_BiologicalProcess-EBI-QuickGO-GOA_20.11.2017_00h00	4.73981e-11	2.20875e-08	9.4939e-25	2.27854e-23	[5]	Group25	6.60955	54	Specific for Cluster #1	[AARS, AGO1, AGO3, CIRBP, EEF1B2, EEF1D, EEF2, EIF2S1, EIF2S2, EIF3M, EIF4A1, EIF4A2, EIF4H, EIF5A, FARSB, GARS, GCLC, HNRNPR, ILF3, KHSRP, LARP1, LARS, NCBP1, NCL, QARS, RACK1, RARS, RBM4B, RBM8A, RIDA, RPL12, RPL13, RPL7, RPL9, RPS11, RPS12, RPS20, RPS24, RPS27A, WARS2]	[ACO1, ADSL, AGO2, CDK5RAP1, CNDP2, GAPDH, GSS, MTPN, NUP210, RAN, RPL22, RPL4, RPS18, TGFBRAP1]	74.0741	25.9259	[AARS, ACO1, ADSL, AGO1, AGO2, AGO3, CDK5RAP1, CIRBP, CNDP2, EEF1B2, EEF1D, EEF2, EIF2S1, EIF2S2, EIF3M, EIF4A1, EIF4A2, EIF4H, EIF5A, FARSB, GAPDH, GARS, GCLC, GSS, HNRNPR, ILF3, KHSRP, LARP1, LARS, MTPN, NCBP1, NCL, NUP210, QARS, RACK1, RAN, RARS, RBM4B, RBM8A, RIDA, RPL12, RPL13, RPL22, RPL4, RPL7, RPL9, RPS11, RPS12, RPS18, RPS20, RPS24, RPS27A, TGFBRAP1, WARS2]
GO:0045088	regulation of innate immune response	GO_BiologicalProcess-EBI-QuickGO-GOA_20.11.2017_00h00	6.63101e-09	2.81155e-06	9.4939e-25	2.27854e-23	[4, 5, 6]	Group25	7.64045	34	None Specific Cluster	[CASP8, FLOT1, HSPA1A, NONO, NPLOC4, PSMB3, PSMB6, PSMC2, PSMD13, PSMD2, PSMD4, PSME1, PYCARD, RPS27A, SAMHD1, SFPQ, UBB, UBE2V1]	[CD209, DNAJA3, FADD, HLA-A, PSMA1, PSMA2, PSMA3, PSMA4, PSMA5, PSMA6, PSMA8, PSMB1, PSMB2, PSMB4, PSME2, UBC]	52.9412	47.0588	[CASP8, CD209, DNAJA3, FADD, FLOT1, HLA-A, HSPA1A, NONO, NPLOC4, PSMA1, PSMA2, PSMA3, PSMA4, PSMA5, PSMA6, PSMA8, PSMB1, PSMB2, PSMB3, PSMB4, PSMB6, PSMC2, PSMD13, PSMD2, PSMD4, PSME1, PSME2, PYCARD, RPS27A, SAMHD1, SFPQ, UBB, UBC, UBE2V1]
GO:0051348	negative regulation of transferase activity	GO_BiologicalProcess-EBI-QuickGO-GOA_20.11.2017_00h00	5.08567e-08	2.06987e-05	9.4939e-25	2.27854e-23	[5]	Group25	7.65306	30	None Specific Cluster	[CORO1C, EIF4A2, PRDX3, PSMB3, PSMB6, PSMC2, PSMD13, PSMD2, PSMD4, PSME1, PYCARD, QARS, RACK1, RPS27A, TSC2, UBB]	[CDK5RAP1, DNAJA3, PSMA1, PSMA2, PSMA3, PSMA4, PSMA5, PSMA6, PSMB1, PSMB2, PSMB4, PSME2, UBC, YWHAG]	53.3333	46.6667	[CDK5RAP1, CORO1C, DNAJA3, EIF4A2, PRDX3, PSMA1, PSMA2, PSMA3, PSMA4, PSMA5, PSMA6, PSMB1, PSMB2, PSMB3, PSMB4, PSMB6, PSMC2, PSMD13, PSMD2, PSMD4, PSME1, PSME2, PYCARD, QARS, RACK1, RPS27A, TSC2, UBB, UBC, YWHAG]
GO:0071456	cellular response to hypoxia	GO_BiologicalProcess-EBI-QuickGO-GOA_20.11.2017_00h00	5.07665e-16	2.78201e-13	9.4939e-25	2.27854e-23	[4, 6]	Group25	15.1961	31	None Specific Cluster	[ACAA2, AQP1, HP1BP3, LMNA, NPEPPS, P4HB, PHB2, PSMB3, PSMB6, PSMC2, PSMD13, PSMD2, PSMD4, PSME1, PTGIS, RPS27A, UBB, USP19]	[HIF3A, PSMA1, PSMA2, PSMA3, PSMA4, PSMA5, PSMA6, PSMA8, PSMB1, PSMB2, PSMB4, PSME2, UBC]	58.0645	41.9355	[ACAA2, AQP1, HIF3A, HP1BP3, LMNA, NPEPPS, P4HB, PHB2, PSMA1, PSMA2, PSMA3, PSMA4, PSMA5, PSMA6, PSMA8, PSMB1, PSMB2, PSMB3, PSMB4, PSMB6, PSMC2, PSMD13, PSMD2, PSMD4, PSME1, PSME2, PTGIS, RPS27A, UBB, UBC, USP19]
GO:1905330	regulation of morphogenesis of an epithelium	GO_BiologicalProcess-EBI-QuickGO-GOA_20.11.2017_00h00	7.68291e-11	3.5495e-08	9.4939e-25	2.27854e-23	[4, 5, 6]	Group25	12.5	24	None Specific Cluster	[AP2S1, PHB2, PSMB3, PSMB6, PSMC2, PSMD13, PSMD2, PSMD4, PSME1, RPS27A, UBB]	[CLTC, PSMA1, PSMA2, PSMA3, PSMA4, PSMA5, PSMA6, PSMA8, PSMB1, PSMB2, PSMB4, PSME2, UBC]	45.8333	54.1667	[AP2S1, CLTC, PHB2, PSMA1, PSMA2, PSMA3, PSMA4, PSMA5, PSMA6, PSMA8, PSMB1, PSMB2, PSMB3, PSMB4, PSMB6, PSMC2, PSMD13, PSMD2, PSMD4, PSME1, PSME2, RPS27A, UBB, UBC]
GO:0000086	G2/M transition of mitotic cell cycle	GO_BiologicalProcess-EBI-QuickGO-GOA_20.11.2017_00h00	2.53697e-12	1.2355e-09	9.4939e-25	2.27854e-23	[5, 6]	Group25	11.5385	30	None Specific Cluster	[BLM, DNM2, DYNC1H1, HSPA2, PAFAH1B1, PSMB3, PSMB6, PSMC2, PSMD13, PSMD2, PSMD4, PSME1, RAB11A, RAB8A, RPS27A, UBB]	[PSMA1, PSMA2, PSMA3, PSMA4, PSMA5, PSMA6, PSMA8, PSMB1, PSMB2, PSMB4, PSME2, UBC, YWHAE, YWHAG]	53.3333	46.6667	[BLM, DNM2, DYNC1H1, HSPA2, PAFAH1B1, PSMA1, PSMA2, PSMA3, PSMA4, PSMA5, PSMA6, PSMA8, PSMB1, PSMB2, PSMB3, PSMB4, PSMB6, PSMC2, PSMD13, PSMD2, PSMD4, PSME1, PSME2, RAB11A, RAB8A, RPS27A, UBB, UBC, YWHAE, YWHAG]
GO:0001736	establishment of planar polarity	GO_BiologicalProcess-EBI-QuickGO-GOA_20.11.2017_00h00	1.27111e-14	6.64788e-12	9.4939e-25	2.27854e-23	[4, 5, 6, 7]	Group25	18.4615	24	None Specific Cluster	[AP2S1, PAFAH1B1, PSMB3, PSMB6, PSMC2, PSMD13, PSMD2, PSMD4, PSME1, RPS27A, UBB]	[CLTC, PSMA1, PSMA2, PSMA3, PSMA4, PSMA5, PSMA6, PSMA8, PSMB1, PSMB2, PSMB4, PSME2, UBC]	45.8333	54.1667	[AP2S1, CLTC, PAFAH1B1, PSMA1, PSMA2, PSMA3, PSMA4, PSMA5, PSMA6, PSMA8, PSMB1, PSMB2, PSMB3, PSMB4, PSMB6, PSMC2, PSMD13, PSMD2, PSMD4, PSME1, PSME2, RPS27A, UBB, UBC]
GO:0001738	morphogenesis of a polarized epithelium	GO_BiologicalProcess-EBI-QuickGO-GOA_20.11.2017_00h00	2.44197e-15	1.30157e-12	9.4939e-25	2.27854e-23	[5, 6]	Group25	17.8082	26	None Specific Cluster	[AP2S1, PAFAH1B1, PSMB3, PSMB6, PSMC2, PSMD13, PSMD2, PSMD4, PSME1, RPS27A, UBB]	[CLTC, MSN, PSMA1, PSMA2, PSMA3, PSMA4, PSMA5, PSMA6, PSMA8, PSMB1, PSMB2, PSMB4, PSME2, TRAF3IP1, UBC]	42.3077	57.6923	[AP2S1, CLTC, MSN, PAFAH1B1, PSMA1, PSMA2, PSMA3, PSMA4, PSMA5, PSMA6, PSMA8, PSMB1, PSMB2, PSMB3, PSMB4, PSMB6, PSMC2, PSMD13, PSMD2, PSMD4, PSME1, PSME2, RPS27A, TRAF3IP1, UBB, UBC]
GO:0010608	posttranscriptional regulation of gene expression	GO_BiologicalProcess-EBI-QuickGO-GOA_20.11.2017_00h00	1.35283e-17	7.75169e-15	9.4939e-25	2.27854e-23	[5, 6]	Group25	9.70696	53	None Specific Cluster	[AGO1, AGO3, CIRBP, EEF2, EIF2S1, EIF4A2, EIF4H, EIF5A, GARS, HNRNPR, HSPA1A, ILF3, KHSRP, LARP1, NCBP1, NCL, PSMB3, PSMB6, PSMC2, PSMD13, PSMD2, PSMD4, PSME1, RACK1, RBM4B, RBM8A, RIDA, RPS27A, TARDBP, UBB, YWHAB]	[ACO1, AGO2, CDK5RAP1, GAPDH, HSPA8, MTPN, NUP210, PSMA1, PSMA2, PSMA3, PSMA4, PSMA5, PSMA6, PSMA8, PSMB1, PSMB2, PSMB4, PSME2, RAN, TGFBRAP1, UBC, YWHAZ]	58.4906	41.5094	[ACO1, AGO1, AGO2, AGO3, CDK5RAP1, CIRBP, EEF2, EIF2S1, EIF4A2, EIF4H, EIF5A, GAPDH, GARS, HNRNPR, HSPA1A, HSPA8, ILF3, KHSRP, LARP1, MTPN, NCBP1, NCL, NUP210, PSMA1, PSMA2, PSMA3, PSMA4, PSMA5, PSMA6, PSMA8, PSMB1, PSMB2, PSMB3, PSMB4, PSMB6, PSMC2, PSMD13, PSMD2, PSMD4, PSME1, PSME2, RACK1, RAN, RBM4B, RBM8A, RIDA, RPS27A, TARDBP, TGFBRAP1, UBB, UBC, YWHAB, YWHAZ]
GO:0016055	Wnt signaling pathway	GO_BiologicalProcess-EBI-QuickGO-GOA_20.11.2017_00h00	3.31529e-09	1.4322e-06	9.4939e-25	2.27854e-23	[4, 5, 6, 7]	Group25	7.4	37	None Specific Cluster	[AGO1, AGO3, AP2S1, CCNE1, DDB1, MARK2, NDRG2, PSMB3, PSMB6, PSMC2, PSMD13, PSMD2, PSMD4, PSME1, RACK1, RPS27A, TNIK, TSC2, UBB, WLS]	[AGO2, CALM1, CLTC, DACT3, DRAXIN, PSMA1, PSMA2, PSMA3, PSMA4, PSMA5, PSMA6, PSMA8, PSMB1, PSMB2, PSMB4, PSME2, UBC]	54.0541	45.9459	[AGO1, AGO2, AGO3, AP2S1, CALM1, CCNE1, CLTC, DACT3, DDB1, DRAXIN, MARK2, NDRG2, PSMA1, PSMA2, PSMA3, PSMA4, PSMA5, PSMA6, PSMA8, PSMB1, PSMB2, PSMB3, PSMB4, PSMB6, PSMC2, PSMD13, PSMD2, PSMD4, PSME1, PSME2, RACK1, RPS27A, TNIK, TSC2, UBB, UBC, WLS]
GO:0019083	viral transcription	GO_BiologicalProcess-EBI-QuickGO-GOA_20.11.2017_00h00	2.31393e-05	0.00782109	9.4939e-25	2.27854e-23	[5, 6]	Group25	8.37696	16	Specific for Cluster #1	[RPL12, RPL13, RPL7, RPL9, RPS11, RPS12, RPS20, RPS24, RPS27A, TARDBP, TRIM21]	[NUP210, RPL22, RPL4, RPS18, TRIM62]	68.75	31.25	[NUP210, RPL12, RPL13, RPL22, RPL4, RPL7, RPL9, RPS11, RPS12, RPS18, RPS20, RPS24, RPS27A, TARDBP, TRIM21, TRIM62]
GO:0032269	negative regulation of cellular protein metabolic process	GO_BiologicalProcess-EBI-QuickGO-GOA_20.11.2017_00h00	6.25532e-13	3.10889e-10	9.4939e-25	2.27854e-23	[4, 5, 6, 7]	Group25	6.15911	72	Specific for Cluster #1	[AGO1, AGO3, AQP1, CIRBP, CORO1C, DMTN, EIF2S1, EZR, FKBP1B, G6PD, GARS, GCLC, HNRNPR, HSPA1A, ILF3, KHSRP, LARP1, NCBP1, NCL, NDRG2, P3H1, PAFAH1B1, PI16, PLAA, PRDX3, PSMB3, PSMB6, PSMC2, PSMD13, PSMD2, PSMD4, PSME1, PYCARD, QARS, RACK1, RAG1, RIDA, RPS27A, SERPINB1, SERPINB6, TARDBP, TRIM21, TSC2, UBB, USP19, VDAC2, YOD1, YWHAB]	[AGO2, ALAD, CALM1, CDK5RAP1, DNAJA3, GAPDH, GPX1, NUP210, PSMA1, PSMA2, PSMA3, PSMA4, PSMA5, PSMA6, PSMB1, PSMB2, PSMB4, PSME2, RAN, TNFRSF6B, TRAF3IP1, UBC, YWHAE, YWHAG]	66.6667	33.3333	[AGO1, AGO2, AGO3, ALAD, AQP1, CALM1, CDK5RAP1, CIRBP, CORO1C, DMTN, DNAJA3, EIF2S1, EZR, FKBP1B, G6PD, GAPDH, GARS, GCLC, GPX1, HNRNPR, HSPA1A, ILF3, KHSRP, LARP1, NCBP1, NCL, NDRG2, NUP210, P3H1, PAFAH1B1, PI16, PLAA, PRDX3, PSMA1, PSMA2, PSMA3, PSMA4, PSMA5, PSMA6, PSMB1, PSMB2, PSMB3, PSMB4, PSMB6, PSMC2, PSMD13, PSMD2, PSMD4, PSME1, PSME2, PYCARD, QARS, RACK1, RAG1, RAN, RIDA, RPS27A, SERPIN…
GO:0045732	positive regulation of protein catabolic process	GO_BiologicalProcess-EBI-QuickGO-GOA_20.11.2017_00h00	8.06356e-13	3.99146e-10	9.4939e-25	2.27854e-23	[4, 5, 6, 7]	Group25	11.3074	32	None Specific Cluster	[DDB1, EZR, GCLC, HSPA1A, PSMB3, PSMB6, PSMC2, PSMD13, PSMD2, PSMD4, PSME1, PTK2, RACK1, RAD23A, RPS27A, UBB]	[MSN, PSMA1, PSMA2, PSMA3, PSMA4, PSMA5, PSMA6, PSMA8, PSMB1, PSMB2, PSMB4, PSME2, RAB7A, RDX, UBC, VCP]	50	50	[DDB1, EZR, GCLC, HSPA1A, MSN, PSMA1, PSMA2, PSMA3, PSMA4, PSMA5, PSMA6, PSMA8, PSMB1, PSMB2, PSMB3, PSMB4, PSMB6, PSMC2, PSMD13, PSMD2, PSMD4, PSME1, PSME2, PTK2, RAB7A, RACK1, RAD23A, RDX, RPS27A, UBB, UBC, VCP]
GO:2000027	regulation of organ morphogenesis	GO_BiologicalProcess-EBI-QuickGO-GOA_20.11.2017_00h00	6.15797e-09	2.61714e-06	9.4939e-25	2.27854e-23	[4, 5, 6, 7]	Group25	9.42029	26	None Specific Cluster	[AP2S1, PHB2, PSMB3, PSMB6, PSMC2, PSMD13, PSMD2, PSMD4, PSME1, RPS27A, SRSF6, UBB, VDAC2]	[CLTC, PSMA1, PSMA2, PSMA3, PSMA4, PSMA5, PSMA6, PSMA8, PSMB1, PSMB2, PSMB4, PSME2, UBC]	50	50	[AP2S1, CLTC, PHB2, PSMA1, PSMA2, PSMA3, PSMA4, PSMA5, PSMA6, PSMA8, PSMB1, PSMB2, PSMB3, PSMB4, PSMB6, PSMC2, PSMD13, PSMD2, PSMD4, PSME1, PSME2, RPS27A, SRSF6, UBB, UBC, VDAC2]
GO:0002218	activation of innate immune response	GO_BiologicalProcess-EBI-QuickGO-GOA_20.11.2017_00h00	7.44559e-11	3.44731e-08	9.4939e-25	2.27854e-23	[3, 5, 6, 7, 8]	Group25	9.81013	31	None Specific Cluster	[CASP8, FLOT1, HSPA1A, NONO, NPLOC4, PSMB3, PSMB6, PSMC2, PSMD13, PSMD2, PSMD4, PSME1, PYCARD, RPS27A, SFPQ, UBB, UBE2V1]	[CD209, FADD, PSMA1, PSMA2, PSMA3, PSMA4, PSMA5, PSMA6, PSMA8, PSMB1, PSMB2, PSMB4, PSME2, UBC]	54.8387	45.1613	[CASP8, CD209, FADD, FLOT1, HSPA1A, NONO, NPLOC4, PSMA1, PSMA2, PSMA3, PSMA4, PSMA5, PSMA6, PSMA8, PSMB1, PSMB2, PSMB3, PSMB4, PSMB6, PSMC2, PSMD13, PSMD2, PSMD4, PSME1, PSME2, PYCARD, RPS27A, SFPQ, UBB, UBC, UBE2V1]
GO:0002244	hematopoietic progenitor cell differentiation	GO_BiologicalProcess-EBI-QuickGO-GOA_20.11.2017_00h00	2.4322e-10	1.11395e-07	9.4939e-25	2.27854e-23	[4, 5, 6, 7, 8]	Group25	12.9412	22	None Specific Cluster	[EEF2, PSMB3, PSMB6, PSMC2, PSMD13, PSMD2, PSMD4, PSME1, RPS27A, UBB]	[PSMA1, PSMA2, PSMA3, PSMA4, PSMA5, PSMA6, PSMA8, PSMB1, PSMB2, PSMB4, PSME2, UBC]	45.4545	54.5455	[EEF2, PSMA1, PSMA2, PSMA3, PSMA4, PSMA5, PSMA6, PSMA8, PSMB1, PSMB2, PSMB3, PSMB4, PSMB6, PSMC2, PSMD13, PSMD2, PSMD4, PSME1, PSME2, RPS27A, UBB, UBC]
GO:0002479	antigen processing and presentation of exogenous peptide antigen via MHC class I, TAP-dependent	GO_BiologicalProcess-EBI-QuickGO-GOA_20.11.2017_00h00	6.11542e-14	3.14944e-11	9.4939e-25	2.27854e-23	[6]	Group25	23.75	19	Specific for Cluster #2	[PSMB3, PSMB6, PSMC2, PSMD13, PSMD2, PSMD4, PSME1]	[HLA-A, PSMA1, PSMA2, PSMA3, PSMA4, PSMA5, PSMA6, PSMA8, PSMB1, PSMB2, PSMB4, PSME2]	36.8421	63.1579	[HLA-A, PSMA1, PSMA2, PSMA3, PSMA4, PSMA5, PSMA6, PSMA8, PSMB1, PSMB2, PSMB3, PSMB4, PSMB6, PSMC2, PSMD13, PSMD2, PSMD4, PSME1, PSME2]
GO:0006396	RNA processing	GO_BiologicalProcess-EBI-QuickGO-GOA_20.11.2017_00h00	2.45208e-10	1.1206e-07	9.4939e-25	2.27854e-23	[5, 6, 7]	Group25	6.01427	59	Specific for Cluster #1	[AARS, AGO1, AGO3, ALYREF, DHX15, GARS, HNRNPDL, HNRNPK, HNRNPL, HNRNPR, HNRNPUL1, HSPA1A, KHSRP, NCBP1, NONO, NOP2, PRDX6, RBM4B, RBM6, RBM8A, RBMX, RPL12, RPL13, RPL7, RPL9, RPS11, RPS12, RPS20, RPS24, RPS27A, RSL1D1, SART3, SCAF1, SFPQ, SNRNP200, SNRPG, SNU13, SRSF3, SRSF6, TARDBP, UBE2V1, WBP4, ZNF326]	[AGO2, BOP1, CDK5RAP1, DBR1, HNRNPA1, HSPA8, LSM1, LSM4, RPL22, RPL4, RPS18, SAP18, SNRPD3, SRSF1, SRSF2, SRSF4]	72.8814	27.1186	[AARS, AGO1, AGO2, AGO3, ALYREF, BOP1, CDK5RAP1, DBR1, DHX15, GARS, HNRNPA1, HNRNPDL, HNRNPK, HNRNPL, HNRNPR, HNRNPUL1, HSPA1A, HSPA8, KHSRP, LSM1, LSM4, NCBP1, NONO, NOP2, PRDX6, RBM4B, RBM6, RBM8A, RBMX, RPL12, RPL13, RPL22, RPL4, RPL7, RPL9, RPS11, RPS12, RPS18, RPS20, RPS24, RPS27A, RSL1D1, SAP18, SART3, SCAF1, SFPQ, SNRNP200, SNRPD3, SNRPG, SNU13, SRSF1, SRSF2, SRSF3, SRSF4, SRSF6, TARDBP, U…
GO:0006412	translation	GO_BiologicalProcess-EBI-QuickGO-GOA_20.11.2017_00h00	2.0895e-11	9.79978e-09	9.4939e-25	2.27854e-23	[5, 6, 7]	Group25	7.10227	50	Specific for Cluster #1	[AARS, AGO1, AGO3, CIRBP, EEF1B2, EEF1D, EEF2, EIF2S1, EIF2S2, EIF3M, EIF4A1, EIF4A2, EIF4H, EIF5A, FARSB, GARS, HNRNPR, ILF3, KHSRP, LARP1, LARS, NCBP1, NCL, QARS, RACK1, RARS, RBM4B, RBM8A, RIDA, RPL12, RPL13, RPL7, RPL9, RPS11, RPS12, RPS20, RPS24, RPS27A, WARS2]	[ACO1, AGO2, CDK5RAP1, GAPDH, MTPN, NUP210, RAN, RPL22, RPL4, RPS18, TGFBRAP1]	78	22	[AARS, ACO1, AGO1, AGO2, AGO3, CDK5RAP1, CIRBP, EEF1B2, EEF1D, EEF2, EIF2S1, EIF2S2, EIF3M, EIF4A1, EIF4A2, EIF4H, EIF5A, FARSB, GAPDH, GARS, HNRNPR, ILF3, KHSRP, LARP1, LARS, MTPN, NCBP1, NCL, NUP210, QARS, RACK1, RAN, RARS, RBM4B, RBM8A, RIDA, RPL12, RPL13, RPL22, RPL4, RPL7, RPL9, RPS11, RPS12, RPS18, RPS20, RPS24, RPS27A, TGFBRAP1, WARS2]
GO:0006413	translational initiation	GO_BiologicalProcess-EBI-QuickGO-GOA_20.11.2017_00h00	3.92764e-08	1.61033e-05	9.4939e-25	2.27854e-23	[3, 6, 7, 8]	Group25	10.2941	21	Specific for Cluster #1	[EIF2S1, EIF2S2, EIF3M, EIF4A1, EIF4A2, EIF4H, LARP1, NCBP1, RPL12, RPL13, RPL7, RPL9, RPS11, RPS12, RPS20, RPS24, RPS27A]	[AGO2, RPL22, RPL4, RPS18]	80.9524	19.0476	[AGO2, EIF2S1, EIF2S2, EIF3M, EIF4A1, EIF4A2, EIF4H, LARP1, NCBP1, RPL12, RPL13, RPL22, RPL4, RPL7, RPL9, RPS11, RPS12, RPS18, RPS20, RPS24, RPS27A]
GO:0016071	mRNA metabolic process	GO_BiologicalProcess-EBI-QuickGO-GOA_20.11.2017_00h00	4.90263e-25	3.03963e-22	9.4939e-25	2.27854e-23	[5, 6, 7]	Group25	9.36019	79	Specific for Cluster #1	[AGO1, AGO3, ALYREF, CIRBP, DHX15, EEF1D, EIF4A1, EIF4A2, HNRNPK, HNRNPL, HNRNPR, HNRNPUL1, HSPA1A, KHSRP, LARP1, NCBP1, NONO, PRDX6, PSMB3, PSMB6, PSMC2, PSMD13, PSMD2, PSMD4, PSME1, RBM4B, RBM8A, RBMX, RPL12, RPL13, RPL7, RPL9, RPS11, RPS12, RPS20, RPS24, RPS27A, SART3, SCAF1, SFPQ, SNRNP200, SNRPG, SNU13, SRSF3, SRSF6, TARDBP, UBB, UBE2V1, WBP4, YWHAB, ZNF326]	[AGO2, DBR1, HNRNPA1, HSPA8, LSM1, LSM4, PATL1, PSMA1, PSMA2, PSMA3, PSMA4, PSMA5, PSMA6, PSMA8, PSMB1, PSMB2, PSMB4, PSME2, RPL22, RPL4, RPS18, SAP18, SNRPD3, SRSF1, SRSF2, SRSF4, UBC, YWHAZ]	64.557	35.443	[AGO1, AGO2, AGO3, ALYREF, CIRBP, DBR1, DHX15, EEF1D, EIF4A1, EIF4A2, HNRNPA1, HNRNPK, HNRNPL, HNRNPR, HNRNPUL1, HSPA1A, HSPA8, KHSRP, LARP1, LSM1, LSM4, NCBP1, NONO, PATL1, PRDX6, PSMA1, PSMA2, PSMA3, PSMA4, PSMA5, PSMA6, PSMA8, PSMB1, PSMB2, PSMB3, PSMB4, PSMB6, PSMC2, PSMD13, PSMD2, PSMD4, PSME1, PSME2, RBM4B, RBM8A, RBMX, RPL12, RPL13, RPL22, RPL4, RPL7, RPL9, RPS11, RPS12, RPS18, RPS20, RPS2…
GO:0030111	regulation of Wnt signaling pathway	GO_BiologicalProcess-EBI-QuickGO-GOA_20.11.2017_00h00	3.85923e-07	0.000150124	9.4939e-25	2.27854e-23	[4, 5, 6, 7, 8]	Group25	7.66962	26	None Specific Cluster	[PSMB3, PSMB6, PSMC2, PSMD13, PSMD2, PSMD4, PSME1, RACK1, RPS27A, TSC2, UBB, WLS]	[DACT3, DRAXIN, PSMA1, PSMA2, PSMA3, PSMA4, PSMA5, PSMA6, PSMA8, PSMB1, PSMB2, PSMB4, PSME2, UBC]	46.1538	53.8462	[DACT3, DRAXIN, PSMA1, PSMA2, PSMA3, PSMA4, PSMA5, PSMA6, PSMA8, PSMB1, PSMB2, PSMB3, PSMB4, PSMB6, PSMC2, PSMD13, PSMD2, PSMD4, PSME1, PSME2, RACK1, RPS27A, TSC2, UBB, UBC, WLS]
GO:0033209	tumor necrosis factor-mediated signaling pathway	GO_BiologicalProcess-EBI-QuickGO-GOA_20.11.2017_00h00	7.44238e-15	3.92213e-12	9.4939e-25	2.27854e-23	[5, 6, 7]	Group25	15.5556	28	None Specific Cluster	[CASP8, ETFB, HSPA1A, PSMB3, PSMB6, PSMC2, PSMD13, PSMD2, PSMD4, PSME1, PYCARD, RACK1, RPS27A, UBB]	[PSMA1, PSMA2, PSMA3, PSMA4, PSMA5, PSMA6, PSMA8, PSMB1, PSMB2, PSMB4, PSME2, SPHK1, TNFRSF6B, UBC]	50	50	[CASP8, ETFB, HSPA1A, PSMA1, PSMA2, PSMA3, PSMA4, PSMA5, PSMA6, PSMA8, PSMB1, PSMB2, PSMB3, PSMB4, PSMB6, PSMC2, PSMD13, PSMD2, PSMD4, PSME1, PSME2, PYCARD, RACK1, RPS27A, SPHK1, TNFRSF6B, UBB, UBC]
GO:0038093	Fc receptor signaling pathway	GO_BiologicalProcess-EBI-QuickGO-GOA_20.11.2017_00h00	2.61026e-09	1.13024e-06	9.4939e-25	2.27854e-23	[5, 6, 7]	Group25	9.81132	26	None Specific Cluster	[ACTG1, PSMB3, PSMB6, PSMC2, PSMD13, PSMD2, PSMD4, PSME1, PTK2, RPS27A, UBB, UBE2V1]	[ACTB, CALM1, PSMA1, PSMA2, PSMA3, PSMA4, PSMA5, PSMA6, PSMA8, PSMB1, PSMB2, PSMB4, PSME2, UBC]	46.1538	53.8462	[ACTB, ACTG1, CALM1, PSMA1, PSMA2, PSMA3, PSMA4, PSMA5, PSMA6, PSMA8, PSMB1, PSMB2, PSMB3, PSMB4, PSMB6, PSMC2, PSMD13, PSMD2, PSMD4, PSME1, PSME2, PTK2, RPS27A, UBB, UBC, UBE2V1]
GO:0070972	protein localization to endoplasmic reticulum	GO_BiologicalProcess-EBI-QuickGO-GOA_20.11.2017_00h00	3.1598e-05	0.0104589	9.4939e-25	2.27854e-23	[6]	Group25	9.62963	13	Specific for Cluster #1	[RPL12, RPL13, RPL7, RPL9, RPS11, RPS12, RPS20, RPS24, RPS27A]	[HSPA5, RPL22, RPL4, RPS18]	69.2308	30.7692	[HSPA5, RPL12, RPL13, RPL22, RPL4, RPL7, RPL9, RPS11, RPS12, RPS18, RPS20, RPS24, RPS27A]
GO:1903362	regulation of cellular protein catabolic process	GO_BiologicalProcess-EBI-QuickGO-GOA_20.11.2017_00h00	2.30208e-14	1.19708e-11	9.4939e-25	2.27854e-23	[5, 6, 7]	Group25	11.7057	35	None Specific Cluster	[EZR, GCLC, HSPA1A, PSMB3, PSMB6, PSMC2, PSMD13, PSMD2, PSMD4, PSME1, PTK2, RACK1, RAD23A, RPS27A, UBB, USP19, YOD1]	[ALAD, GPX1, MSN, PSMA1, PSMA2, PSMA3, PSMA4, PSMA5, PSMA6, PSMA8, PSMB1, PSMB2, PSMB4, PSME2, RAD23B, RDX, UBC, VCP]	48.5714	51.4286	[ALAD, EZR, GCLC, GPX1, HSPA1A, MSN, PSMA1, PSMA2, PSMA3, PSMA4, PSMA5, PSMA6, PSMA8, PSMB1, PSMB2, PSMB3, PSMB4, PSMB6, PSMC2, PSMD13, PSMD2, PSMD4, PSME1, PSME2, PTK2, RACK1, RAD23A, RAD23B, RDX, RPS27A, UBB, UBC, USP19, VCP, YOD1]
GO:0002758	innate immune response-activating signal transduction	GO_BiologicalProcess-EBI-QuickGO-GOA_20.11.2017_00h00	1.68333e-09	7.3393e-07	9.4939e-25	2.27854e-23	[4, 5, 6, 7, 8, 9]	Group25	9.39597	28	None Specific Cluster	[CASP8, FLOT1, HSPA1A, NPLOC4, PSMB3, PSMB6, PSMC2, PSMD13, PSMD2, PSMD4, PSME1, RPS27A, UBB, UBE2V1]	[CD209, FADD, PSMA1, PSMA2, PSMA3, PSMA4, PSMA5, PSMA6, PSMA8, PSMB1, PSMB2, PSMB4, PSME2, UBC]	50	50	[CASP8, CD209, FADD, FLOT1, HSPA1A, NPLOC4, PSMA1, PSMA2, PSMA3, PSMA4, PSMA5, PSMA6, PSMA8, PSMB1, PSMB2, PSMB3, PSMB4, PSMB6, PSMC2, PSMD13, PSMD2, PSMD4, PSME1, PSME2, RPS27A, UBB, UBC, UBE2V1]
GO:0006402	mRNA catabolic process	GO_BiologicalProcess-EBI-QuickGO-GOA_20.11.2017_00h00	2.23011e-24	1.38044e-21	9.4939e-25	2.27854e-23	[5, 6, 7, 8]	Group25	14.2458	51	None Specific Cluster	[AGO1, AGO3, CIRBP, EIF4A1, EIF4A2, HNRNPR, HSPA1A, KHSRP, LARP1, NCBP1, PSMB3, PSMB6, PSMC2, PSMD13, PSMD2, PSMD4, PSME1, RBM8A, RPL12, RPL13, RPL7, RPL9, RPS11, RPS12, RPS20, RPS24, RPS27A, TARDBP, UBB, YWHAB]	[AGO2, HSPA8, LSM1, LSM4, PATL1, PSMA1, PSMA2, PSMA3, PSMA4, PSMA5, PSMA6, PSMA8, PSMB1, PSMB2, PSMB4, PSME2, RPL22, RPL4, RPS18, UBC, YWHAZ]	58.8235	41.1765	[AGO1, AGO2, AGO3, CIRBP, EIF4A1, EIF4A2, HNRNPR, HSPA1A, HSPA8, KHSRP, LARP1, LSM1, LSM4, NCBP1, PATL1, PSMA1, PSMA2, PSMA3, PSMA4, PSMA5, PSMA6, PSMA8, PSMB1, PSMB2, PSMB3, PSMB4, PSMB6, PSMC2, PSMD13, PSMD2, PSMD4, PSME1, PSME2, RBM8A, RPL12, RPL13, RPL22, RPL4, RPL7, RPL9, RPS11, RPS12, RPS18, RPS20, RPS24, RPS27A, TARDBP, UBB, UBC, YWHAB, YWHAZ]
GO:0010498	proteasomal protein catabolic process	GO_BiologicalProcess-EBI-QuickGO-GOA_20.11.2017_00h00	9.35612e-12	4.47223e-09	9.4939e-25	2.27854e-23	[5, 6, 7, 8]	Group25	8.72483	39	None Specific Cluster	[CD2AP, DDB1, GCLC, HSPA1A, NPLOC4, PLAA, PSMB3, PSMB6, PSMC2, PSMD13, PSMD2, PSMD4, PSME1, RACK1, RAD23A, RPS27A, UBB, USP19, YOD1]	[ALAD, DNAJB12, GPX1, HSPA5, PSMA1, PSMA2, PSMA3, PSMA4, PSMA5, PSMA6, PSMA8, PSMB1, PSMB2, PSMB4, PSME2, RAD23B, UBC, UBR2, VCP, WFS1]	48.7179	51.2821	[ALAD, CD2AP, DDB1, DNAJB12, GCLC, GPX1, HSPA1A, HSPA5, NPLOC4, PLAA, PSMA1, PSMA2, PSMA3, PSMA4, PSMA5, PSMA6, PSMA8, PSMB1, PSMB2, PSMB3, PSMB4, PSMB6, PSMC2, PSMD13, PSMD2, PSMD4, PSME1, PSME2, RACK1, RAD23A, RAD23B, RPS27A, UBB, UBC, UBR2, USP19, VCP, WFS1, YOD1]
GO:0010803	regulation of tumor necrosis factor-mediated signaling pathway	GO_BiologicalProcess-EBI-QuickGO-GOA_20.11.2017_00h00	2.35793e-05	0.00794623	9.4939e-25	2.27854e-23	[5, 6, 7, 8]	Group25	14.2857	9	Specific for Cluster #1	[CASP8, ETFB, HSPA1A, PYCARD, RACK1, RPS27A, UBB]	[SPHK1, UBC]	77.7778	22.2222	[CASP8, ETFB, HSPA1A, PYCARD, RACK1, RPS27A, SPHK1, UBB, UBC]
GO:0031400	negative regulation of protein modification process	GO_BiologicalProcess-EBI-QuickGO-GOA_20.11.2017_00h00	1.42061e-09	6.22227e-07	9.4939e-25	2.27854e-23	[5, 6, 7, 8]	Group25	6.80062	44	Specific for Cluster #1	[CORO1C, DMTN, EZR, FKBP1B, G6PD, GCLC, HSPA1A, NDRG2, P3H1, PAFAH1B1, PLAA, PSMB3, PSMB6, PSMC2, PSMD13, PSMD2, PSMD4, PSME1, PYCARD, QARS, RACK1, RPS27A, TARDBP, TRIM21, TSC2, UBB, YWHAB]	[CALM1, CDK5RAP1, DNAJA3, PSMA1, PSMA2, PSMA3, PSMA4, PSMA5, PSMA6, PSMB1, PSMB2, PSMB4, PSME2, TRAF3IP1, UBC, YWHAE, YWHAG]	61.3636	38.6364	[CALM1, CDK5RAP1, CORO1C, DMTN, DNAJA3, EZR, FKBP1B, G6PD, GCLC, HSPA1A, NDRG2, P3H1, PAFAH1B1, PLAA, PSMA1, PSMA2, PSMA3, PSMA4, PSMA5, PSMA6, PSMB1, PSMB2, PSMB3, PSMB4, PSMB6, PSMC2, PSMD13, PSMD2, PSMD4, PSME1, PSME2, PYCARD, QARS, RACK1, RPS27A, TARDBP, TRAF3IP1, TRIM21, TSC2, UBB, UBC, YWHAB, YWHAE, YWHAG]
GO:0035567	non-canonical Wnt signaling pathway	GO_BiologicalProcess-EBI-QuickGO-GOA_20.11.2017_00h00	2.05363e-15	1.09869e-12	9.4939e-25	2.27854e-23	[5, 6, 7, 8]	Group25	17.0886	27	None Specific Cluster	[AGO1, AGO3, AP2S1, PSMB3, PSMB6, PSMC2, PSMD13, PSMD2, PSMD4, PSME1, RPS27A, UBB]	[AGO2, CALM1, CLTC, PSMA1, PSMA2, PSMA3, PSMA4, PSMA5, PSMA6, PSMA8, PSMB1, PSMB2, PSMB4, PSME2, UBC]	44.4444	55.5556	[AGO1, AGO2, AGO3, AP2S1, CALM1, CLTC, PSMA1, PSMA2, PSMA3, PSMA4, PSMA5, PSMA6, PSMA8, PSMB1, PSMB2, PSMB3, PSMB4, PSMB6, PSMC2, PSMD13, PSMD2, PSMD4, PSME1, PSME2, RPS27A, UBB, UBC]
GO:0045862	positive regulation of proteolysis	GO_BiologicalProcess-EBI-QuickGO-GOA_20.11.2017_00h00	9.14122e-12	4.37864e-09	9.4939e-25	2.27854e-23	[5, 6, 7, 8]	Group25	9.1133	37	None Specific Cluster	[CASP8, DLC1, GCLC, HSPA1A, MYH9, PDCD5, PSMB3, PSMB6, PSMC2, PSMD13, PSMD2, PSMD4, PSME1, PTK2, PYCARD, RACK1, RAD23A, RPS27A, SART3, UBB]	[ANP32B, DNAJA3, FADD, PCOLCE, PSMA1, PSMA2, PSMA3, PSMA4, PSMA5, PSMA6, PSMA8, PSMB1, PSMB2, PSMB4, PSME2, UBC, VCP]	54.0541	45.9459	[ANP32B, CASP8, DLC1, DNAJA3, FADD, GCLC, HSPA1A, MYH9, PCOLCE, PDCD5, PSMA1, PSMA2, PSMA3, PSMA4, PSMA5, PSMA6, PSMA8, PSMB1, PSMB2, PSMB3, PSMB4, PSMB6, PSMC2, PSMD13, PSMD2, PSMD4, PSME1, PSME2, PTK2, PYCARD, RACK1, RAD23A, RPS27A, SART3, UBB, UBC, VCP]
GO:0070646	protein modification by small protein removal	GO_BiologicalProcess-EBI-QuickGO-GOA_20.11.2017_00h00	2.81491e-11	1.31738e-08	9.4939e-25	2.27854e-23	[5, 6, 7, 8]	Group25	9.90712	32	None Specific Cluster	[COPS7A, GARS, PSMB3, PSMB6, PSMC2, PSMD13, PSMD2, PSMD4, PSME1, RAD23A, RPS27A, SART3, TRIM21, UBB, USP19, YOD1]	[ACTB, OTUB2, PSMA1, PSMA2, PSMA3, PSMA4, PSMA5, PSMA6, PSMA8, PSMB1, PSMB2, PSMB4, PSME2, RAD23B, UBC, VCP]	50	50	[ACTB, COPS7A, GARS, OTUB2, PSMA1, PSMA2, PSMA3, PSMA4, PSMA5, PSMA6, PSMA8, PSMB1, PSMB2, PSMB3, PSMB4, PSMB6, PSMC2, PSMD13, PSMD2, PSMD4, PSME1, PSME2, RAD23A, RAD23B, RPS27A, SART3, TRIM21, UBB, UBC, USP19, VCP, YOD1]
GO:1903311	regulation of mRNA metabolic process	GO_BiologicalProcess-EBI-QuickGO-GOA_20.11.2017_00h00	9.75327e-22	5.97876e-19	9.4939e-25	2.27854e-23	[5, 6, 7, 8]	Group25	15.1408	43	None Specific Cluster	[CIRBP, HNRNPK, HNRNPL, HNRNPR, HSPA1A, KHSRP, LARP1, NCBP1, PRDX6, PSMB3, PSMB6, PSMC2, PSMD13, PSMD2, PSMD4, PSME1, RBM8A, RBMX, RPS27A, SRSF3, SRSF6, TARDBP, UBB, YWHAB]	[AGO2, HNRNPA1, HSPA8, PSMA1, PSMA2, PSMA3, PSMA4, PSMA5, PSMA6, PSMA8, PSMB1, PSMB2, PSMB4, PSME2, SAP18, SRSF2, SRSF4, UBC, YWHAZ]	55.814	44.186	[AGO2, CIRBP, HNRNPA1, HNRNPK, HNRNPL, HNRNPR, HSPA1A, HSPA8, KHSRP, LARP1, NCBP1, PRDX6, PSMA1, PSMA2, PSMA3, PSMA4, PSMA5, PSMA6, PSMA8, PSMB1, PSMB2, PSMB3, PSMB4, PSMB6, PSMC2, PSMD13, PSMD2, PSMD4, PSME1, PSME2, RBM8A, RBMX, RPS27A, SAP18, SRSF2, SRSF3, SRSF4, SRSF6, TARDBP, UBB, UBC, YWHAB, YWHAZ]
GO:1903364	positive regulation of cellular protein catabolic process	GO_BiologicalProcess-EBI-QuickGO-GOA_20.11.2017_00h00	7.41831e-15	3.91687e-12	9.4939e-25	2.27854e-23	[5, 6, 7, 8]	Group25	14.3541	30	None Specific Cluster	[EZR, GCLC, HSPA1A, PSMB3, PSMB6, PSMC2, PSMD13, PSMD2, PSMD4, PSME1, PTK2, RACK1, RAD23A, RPS27A, UBB]	[MSN, PSMA1, PSMA2, PSMA3, PSMA4, PSMA5, PSMA6, PSMA8, PSMB1, PSMB2, PSMB4, PSME2, RDX, UBC, VCP]	50	50	[EZR, GCLC, HSPA1A, MSN, PSMA1, PSMA2, PSMA3, PSMA4, PSMA5, PSMA6, PSMA8, PSMB1, PSMB2, PSMB3, PSMB4, PSMB6, PSMC2, PSMD13, PSMD2, PSMD4, PSME1, PSME2, PTK2, RACK1, RAD23A, RDX, RPS27A, UBB, UBC, VCP]
GO:0043312	neutrophil degranulation	GO_BiologicalProcess-EBI-QuickGO-GOA_20.11.2017_00h00	5.4707e-10	2.45635e-07	9.4939e-25	2.27854e-23	[4, 6, 7, 8, 9]	Group25	7.47664	40	Specific for Cluster #1	[ACTR1B, CAT, COPB1, DBNL, DLC1, DYNC1H1, EEF2, FRK, GDI2, HSPA1A, HUWE1, ILF2, IQGAP1, MGST1, NIT2, PRDX4, PRDX6, PRSS3, PSMC2, PSMD13, PSMD2, PYCARD, RAB5B, RAB5C, SERPINB1, SERPINB6, SPTAN1]	[ALAD, FTH1, HLA-A, HSPA6, HSPA8, NME2, PGAM1, PSMA2, PSMA5, PSMB1, RAB7A, RAP2B, VCP]	67.5	32.5	[ACTR1B, ALAD, CAT, COPB1, DBNL, DLC1, DYNC1H1, EEF2, FRK, FTH1, GDI2, HLA-A, HSPA1A, HSPA6, HSPA8, HUWE1, ILF2, IQGAP1, MGST1, NIT2, NME2, PGAM1, PRDX4, PRDX6, PRSS3, PSMA2, PSMA5, PSMB1, PSMC2, PSMD13, PSMD2, PYCARD, RAB5B, RAB5C, RAB7A, RAP2B, SERPINB1, SERPINB6, SPTAN1, VCP]
GO:0006397	mRNA processing	GO_BiologicalProcess-EBI-QuickGO-GOA_20.11.2017_00h00	1.68064e-08	7.0587e-06	9.4939e-25	2.27854e-23	[6, 7, 8]	Group25	7.08661	36	Specific for Cluster #1	[ALYREF, DHX15, HNRNPK, HNRNPL, HNRNPR, HNRNPUL1, HSPA1A, KHSRP, NCBP1, NONO, PRDX6, RBM4B, RBM8A, RBMX, SART3, SCAF1, SFPQ, SNRNP200, SNRPG, SNU13, SRSF3, SRSF6, TARDBP, UBE2V1, WBP4, ZNF326]	[DBR1, HNRNPA1, HSPA8, LSM1, LSM4, SAP18, SNRPD3, SRSF1, SRSF2, SRSF4]	72.2222	27.7778	[ALYREF, DBR1, DHX15, HNRNPA1, HNRNPK, HNRNPL, HNRNPR, HNRNPUL1, HSPA1A, HSPA8, KHSRP, LSM1, LSM4, NCBP1, NONO, PRDX6, RBM4B, RBM8A, RBMX, SAP18, SART3, SCAF1, SFPQ, SNRNP200, SNRPD3, SNRPG, SNU13, SRSF1, SRSF2, SRSF3, SRSF4, SRSF6, TARDBP, UBE2V1, WBP4, ZNF326]
GO:0008380	RNA splicing	GO_BiologicalProcess-EBI-QuickGO-GOA_20.11.2017_00h00	4.99416e-10	2.24737e-07	9.4939e-25	2.27854e-23	[6, 7, 8]	Group25	8.08989	36	Specific for Cluster #1	[ALYREF, DHX15, HNRNPK, HNRNPL, HNRNPR, HNRNPUL1, HSPA1A, KHSRP, NCBP1, NONO, PRDX6, RBM4B, RBM8A, RBMX, SART3, SCAF1, SFPQ, SNRNP200, SNRPG, SNU13, SRSF3, SRSF6, TARDBP, UBE2V1, WBP4, ZNF326]	[DBR1, HNRNPA1, HSPA8, LSM1, LSM4, SAP18, SNRPD3, SRSF1, SRSF2, SRSF4]	72.2222	27.7778	[ALYREF, DBR1, DHX15, HNRNPA1, HNRNPK, HNRNPL, HNRNPR, HNRNPUL1, HSPA1A, HSPA8, KHSRP, LSM1, LSM4, NCBP1, NONO, PRDX6, RBM4B, RBM8A, RBMX, SAP18, SART3, SCAF1, SFPQ, SNRNP200, SNRPD3, SNRPG, SNU13, SRSF1, SRSF2, SRSF3, SRSF4, SRSF6, TARDBP, UBE2V1, WBP4, ZNF326]
GO:0010389	regulation of G2/M transition of mitotic cell cycle	GO_BiologicalProcess-EBI-QuickGO-GOA_20.11.2017_00h00	1.46581e-13	7.47563e-11	9.4939e-25	2.27854e-23	[6, 7, 8]	Group25	13.8614	28	None Specific Cluster	[BLM, DYNC1H1, HSPA2, PAFAH1B1, PSMB3, PSMB6, PSMC2, PSMD13, PSMD2, PSMD4, PSME1, RAB11A, RPS27A, UBB]	[PSMA1, PSMA2, PSMA3, PSMA4, PSMA5, PSMA6, PSMA8, PSMB1, PSMB2, PSMB4, PSME2, UBC, YWHAE, YWHAG]	50	50	[BLM, DYNC1H1, HSPA2, PAFAH1B1, PSMA1, PSMA2, PSMA3, PSMA4, PSMA5, PSMA6, PSMA8, PSMB1, PSMB2, PSMB3, PSMB4, PSMB6, PSMC2, PSMD13, PSMD2, PSMD4, PSME1, PSME2, RAB11A, RPS27A, UBB, UBC, YWHAE, YWHAG]
GO:0017148	negative regulation of translation	GO_BiologicalProcess-EBI-QuickGO-GOA_20.11.2017_00h00	2.89804e-05	0.00965046	9.4939e-25	2.27854e-23	[5, 6, 7, 8, 9]	Group25	7.87037	17	Specific for Cluster #1	[AGO1, AGO3, CIRBP, EIF2S1, GARS, HNRNPR, ILF3, KHSRP, LARP1, NCBP1, NCL, RACK1, RIDA]	[AGO2, GAPDH, NUP210, RAN]	76.4706	23.5294	[AGO1, AGO2, AGO3, CIRBP, EIF2S1, GAPDH, GARS, HNRNPR, ILF3, KHSRP, LARP1, NCBP1, NCL, NUP210, RACK1, RAN, RIDA]
GO:0038095	Fc-epsilon receptor signaling pathway	GO_BiologicalProcess-EBI-QuickGO-GOA_20.11.2017_00h00	5.56845e-10	2.49467e-07	9.4939e-25	2.27854e-23	[6, 7, 8]	Group25	11.8557	23	None Specific Cluster	[PSMB3, PSMB6, PSMC2, PSMD13, PSMD2, PSMD4, PSME1, RPS27A, UBB, UBE2V1]	[CALM1, PSMA1, PSMA2, PSMA3, PSMA4, PSMA5, PSMA6, PSMA8, PSMB1, PSMB2, PSMB4, PSME2, UBC]	43.4783	56.5217	[CALM1, PSMA1, PSMA2, PSMA3, PSMA4, PSMA5, PSMA6, PSMA8, PSMB1, PSMB2, PSMB3, PSMB4, PSMB6, PSMC2, PSMD13, PSMD2, PSMD4, PSME1, PSME2, RPS27A, UBB, UBC, UBE2V1]
GO:0043484	regulation of RNA splicing	GO_BiologicalProcess-EBI-QuickGO-GOA_20.11.2017_00h00	9.14851e-08	3.696e-05	9.4939e-25	2.27854e-23	[5, 6, 7, 8, 9]	Group25	12.6984	16	Specific for Cluster #1	[HNRNPK, HNRNPL, HSPA1A, NCBP1, PRDX6, RBM8A, RBMX, SRSF3, SRSF6, ZNF326]	[HNRNPA1, HSPA8, SAP18, SRSF1, SRSF2, SRSF4]	62.5	37.5	[HNRNPA1, HNRNPK, HNRNPL, HSPA1A, HSPA8, NCBP1, PRDX6, RBM8A, RBMX, SAP18, SRSF1, SRSF2, SRSF3, SRSF4, SRSF6, ZNF326]
GO:0050684	regulation of mRNA processing	GO_BiologicalProcess-EBI-QuickGO-GOA_20.11.2017_00h00	1.09256e-06	0.000419544	9.4939e-25	2.27854e-23	[5, 6, 7, 8, 9]	Group25	12.069	14	Specific for Cluster #1	[HNRNPK, HNRNPL, HSPA1A, NCBP1, PRDX6, RBM8A, RBMX, SRSF3, SRSF6]	[HNRNPA1, HSPA8, SAP18, SRSF2, SRSF4]	64.2857	35.7143	[HNRNPA1, HNRNPK, HNRNPL, HSPA1A, HSPA8, NCBP1, PRDX6, RBM8A, RBMX, SAP18, SRSF2, SRSF3, SRSF4, SRSF6]
GO:0050851	antigen receptor-mediated signaling pathway	GO_BiologicalProcess-EBI-QuickGO-GOA_20.11.2017_00h00	1.63476e-07	6.53906e-05	9.4939e-25	2.27854e-23	[5, 6, 7, 8, 9]	Group25	8.51064	24	None Specific Cluster	[EZR, PSMB3, PSMB6, PSMC2, PSMD13, PSMD2, PSMD4, PSME1, RPS27A, UBB, UBE2V1]	[AGRN, PSMA1, PSMA2, PSMA3, PSMA4, PSMA5, PSMA6, PSMA8, PSMB1, PSMB2, PSMB4, PSME2, UBC]	45.8333	54.1667	[AGRN, EZR, PSMA1, PSMA2, PSMA3, PSMA4, PSMA5, PSMA6, PSMA8, PSMB1, PSMB2, PSMB3, PSMB4, PSMB6, PSMC2, PSMD13, PSMD2, PSMD4, PSME1, PSME2, RPS27A, UBB, UBC, UBE2V1]
GO:0060828	regulation of canonical Wnt signaling pathway	GO_BiologicalProcess-EBI-QuickGO-GOA_20.11.2017_00h00	2.6139e-08	1.08477e-05	9.4939e-25	2.27854e-23	[5, 6, 7, 8, 9]	Group25	9.375	24	None Specific Cluster	[PSMB3, PSMB6, PSMC2, PSMD13, PSMD2, PSMD4, PSME1, RPS27A, UBB, WLS]	[DACT3, DRAXIN, PSMA1, PSMA2, PSMA3, PSMA4, PSMA5, PSMA6, PSMA8, PSMB1, PSMB2, PSMB4, PSME2, UBC]	41.6667	58.3333	[DACT3, DRAXIN, PSMA1, PSMA2, PSMA3, PSMA4, PSMA5, PSMA6, PSMA8, PSMB1, PSMB2, PSMB3, PSMB4, PSMB6, PSMC2, PSMD13, PSMD2, PSMD4, PSME1, PSME2, RPS27A, UBB, UBC, WLS]
GO:0061013	regulation of mRNA catabolic process	GO_BiologicalProcess-EBI-QuickGO-GOA_20.11.2017_00h00	7.78824e-18	4.48603e-15	9.4939e-25	2.27854e-23	[5, 6, 7, 8, 9]	Group25	17.5141	31	None Specific Cluster	[CIRBP, HNRNPR, HSPA1A, KHSRP, LARP1, PSMB3, PSMB6, PSMC2, PSMD13, PSMD2, PSMD4, PSME1, RPS27A, TARDBP, UBB, YWHAB]	[AGO2, HSPA8, PSMA1, PSMA2, PSMA3, PSMA4, PSMA5, PSMA6, PSMA8, PSMB1, PSMB2, PSMB4, PSME2, UBC, YWHAZ]	51.6129	48.3871	[AGO2, CIRBP, HNRNPR, HSPA1A, HSPA8, KHSRP, LARP1, PSMA1, PSMA2, PSMA3, PSMA4, PSMA5, PSMA6, PSMA8, PSMB1, PSMB2, PSMB3, PSMB4, PSMB6, PSMC2, PSMD13, PSMD2, PSMD4, PSME1, PSME2, RPS27A, TARDBP, UBB, UBC, YWHAB, YWHAZ]
GO:1903050	regulation of proteolysis involved in cellular protein catabolic process	GO_BiologicalProcess-EBI-QuickGO-GOA_20.11.2017_00h00	1.98129e-13	1.00253e-10	9.4939e-25	2.27854e-23	[6, 7, 8]	Group25	11.8959	32	None Specific Cluster	[GCLC, HSPA1A, PSMB3, PSMB6, PSMC2, PSMD13, PSMD2, PSMD4, PSME1, PTK2, RACK1, RAD23A, RPS27A, UBB, USP19, YOD1]	[ALAD, GPX1, PSMA1, PSMA2, PSMA3, PSMA4, PSMA5, PSMA6, PSMA8, PSMB1, PSMB2, PSMB4, PSME2, RAD23B, UBC, VCP]	50	50	[ALAD, GCLC, GPX1, HSPA1A, PSMA1, PSMA2, PSMA3, PSMA4, PSMA5, PSMA6, PSMA8, PSMB1, PSMB2, PSMB3, PSMB4, PSMB6, PSMC2, PSMD13, PSMD2, PSMD4, PSME1, PSME2, PTK2, RACK1, RAD23A, RAD23B, RPS27A, UBB, UBC, USP19, VCP, YOD1]
GO:1903320	regulation of protein modification by small protein conjugation or removal	GO_BiologicalProcess-EBI-QuickGO-GOA_20.11.2017_00h00	4.63733e-14	2.3975e-11	9.4939e-25	2.27854e-23	[6, 7, 8]	Group25	11.4379	35	None Specific Cluster	[ARRDC3, GCLC, HSPA1A, PLAA, PSMB3, PSMB6, PSMC2, PSMD13, PSMD2, PSMD4, PSME1, PTK2, RAB1A, RPS27A, SART3, TRIM21, UBB, UBE2L3]	[DNAJA3, HSPA5, PSMA1, PSMA2, PSMA3, PSMA4, PSMA5, PSMA6, PSMA8, PSMB1, PSMB2, PSMB4, PSME2, SPHK1, UBC, VCP, WFS1]	51.4286	48.5714	[ARRDC3, DNAJA3, GCLC, HSPA1A, HSPA5, PLAA, PSMA1, PSMA2, PSMA3, PSMA4, PSMA5, PSMA6, PSMA8, PSMB1, PSMB2, PSMB3, PSMB4, PSMB6, PSMC2, PSMD13, PSMD2, PSMD4, PSME1, PSME2, PTK2, RAB1A, RPS27A, SART3, SPHK1, TRIM21, UBB, UBC, UBE2L3, VCP, WFS1]
GO:0000956	nuclear-transcribed mRNA catabolic process	GO_BiologicalProcess-EBI-QuickGO-GOA_20.11.2017_00h00	1.23458e-07	4.95067e-05	9.4939e-25	2.27854e-23	[6, 7, 8, 9]	Group25	9.63303	21	Specific for Cluster #1	[AGO1, EIF4A1, EIF4A2, NCBP1, RBM8A, RPL12, RPL13, RPL7, RPL9, RPS11, RPS12, RPS20, RPS24, RPS27A]	[AGO2, LSM1, LSM4, PATL1, RPL22, RPL4, RPS18]	66.6667	33.3333	[AGO1, AGO2, EIF4A1, EIF4A2, LSM1, LSM4, NCBP1, PATL1, RBM8A, RPL12, RPL13, RPL22, RPL4, RPL7, RPL9, RPS11, RPS12, RPS18, RPS20, RPS24, RPS27A]
GO:0006612	protein targeting to membrane	GO_BiologicalProcess-EBI-QuickGO-GOA_20.11.2017_00h00	0.000145852	0.0417137	9.4939e-25	2.27854e-23	[5, 6, 7, 8, 9, 10]	Group25	7.86517	14	Specific for Cluster #1	[DMTN, MTCL1, RPL12, RPL13, RPL7, RPL9, RPS11, RPS12, RPS20, RPS24, RPS27A]	[RPL22, RPL4, RPS18]	78.5714	21.4286	[DMTN, MTCL1, RPL12, RPL13, RPL22, RPL4, RPL7, RPL9, RPS11, RPS12, RPS18, RPS20, RPS24, RPS27A]
GO:0010972	negative regulation of G2/M transition of mitotic cell cycle	GO_BiologicalProcess-EBI-QuickGO-GOA_20.11.2017_00h00	8.63089e-16	4.68657e-13	9.4939e-25	2.27854e-23	[6, 7, 8, 9]	Group25	23.4043	22	None Specific Cluster	[BLM, PSMB3, PSMB6, PSMC2, PSMD13, PSMD2, PSMD4, PSME1, RPS27A, UBB]	[PSMA1, PSMA2, PSMA3, PSMA4, PSMA5, PSMA6, PSMA8, PSMB1, PSMB2, PSMB4, PSME2, UBC]	45.4545	54.5455	[BLM, PSMA1, PSMA2, PSMA3, PSMA4, PSMA5, PSMA6, PSMA8, PSMB1, PSMB2, PSMB3, PSMB4, PSMB6, PSMC2, PSMD13, PSMD2, PSMD4, PSME1, PSME2, RPS27A, UBB, UBC]
GO:0060071	Wnt signaling pathway, planar cell polarity pathway	GO_BiologicalProcess-EBI-QuickGO-GOA_20.11.2017_00h00	1.10201e-14	5.78556e-12	9.4939e-25	2.27854e-23	[6, 7, 8, 9]	Group25	19.6581	23	None Specific Cluster	[AP2S1, PSMB3, PSMB6, PSMC2, PSMD13, PSMD2, PSMD4, PSME1, RPS27A, UBB]	[CLTC, PSMA1, PSMA2, PSMA3, PSMA4, PSMA5, PSMA6, PSMA8, PSMB1, PSMB2, PSMB4, PSME2, UBC]	43.4783	56.5217	[AP2S1, CLTC, PSMA1, PSMA2, PSMA3, PSMA4, PSMA5, PSMA6, PSMA8, PSMB1, PSMB2, PSMB3, PSMB4, PSMB6, PSMC2, PSMD13, PSMD2, PSMD4, PSME1, PSME2, RPS27A, UBB, UBC]
GO:0061136	regulation of proteasomal protein catabolic process	GO_BiologicalProcess-EBI-QuickGO-GOA_20.11.2017_00h00	0.00012942	0.0376613	9.4939e-25	2.27854e-23	[6, 7, 8, 9]	Group25	7.95455	14	Specific for Cluster #1	[GCLC, HSPA1A, PSMC2, PSME1, RACK1, RAD23A, UBB, USP19, YOD1]	[ALAD, GPX1, PSME2, RAD23B, VCP]	64.2857	35.7143	[ALAD, GCLC, GPX1, HSPA1A, PSMC2, PSME1, PSME2, RACK1, RAD23A, RAD23B, UBB, USP19, VCP, YOD1]
GO:0090263	positive regulation of canonical Wnt signaling pathway	GO_BiologicalProcess-EBI-QuickGO-GOA_20.11.2017_00h00	7.52129e-13	3.73056e-10	9.4939e-25	2.27854e-23	[5, 6, 7, 8, 9, 10]	Group25	17.1875	22	None Specific Cluster	[PSMB3, PSMB6, PSMC2, PSMD13, PSMD2, PSMD4, PSME1, RPS27A, UBB, WLS]	[PSMA1, PSMA2, PSMA3, PSMA4, PSMA5, PSMA6, PSMA8, PSMB1, PSMB2, PSMB4, PSME2, UBC]	45.4545	54.5455	[PSMA1, PSMA2, PSMA3, PSMA4, PSMA5, PSMA6, PSMA8, PSMB1, PSMB2, PSMB3, PSMB4, PSMB6, PSMC2, PSMD13, PSMD2, PSMD4, PSME1, PSME2, RPS27A, UBB, UBC, WLS]
GO:1902036	regulation of hematopoietic stem cell differentiation	GO_BiologicalProcess-EBI-QuickGO-GOA_20.11.2017_00h00	5.44287e-16	2.97725e-13	9.4939e-25	2.27854e-23	[5, 6, 7, 8, 9, 10]	Group25	25.6098	21	None Specific Cluster	[PSMB3, PSMB6, PSMC2, PSMD13, PSMD2, PSMD4, PSME1, RPS27A, UBB]	[PSMA1, PSMA2, PSMA3, PSMA4, PSMA5, PSMA6, PSMA8, PSMB1, PSMB2, PSMB4, PSME2, UBC]	42.8571	57.1429	[PSMA1, PSMA2, PSMA3, PSMA4, PSMA5, PSMA6, PSMA8, PSMB1, PSMB2, PSMB3, PSMB4, PSMB6, PSMC2, PSMD13, PSMD2, PSMD4, PSME1, PSME2, RPS27A, UBB, UBC]
GO:1903052	positive regulation of proteolysis involved in cellular protein catabolic process	GO_BiologicalProcess-EBI-QuickGO-GOA_20.11.2017_00h00	2.48681e-13	1.25086e-10	9.4939e-25	2.27854e-23	[6, 7, 8, 9]	Group25	14.1361	27	None Specific Cluster	[GCLC, HSPA1A, PSMB3, PSMB6, PSMC2, PSMD13, PSMD2, PSMD4, PSME1, PTK2, RACK1, RAD23A, RPS27A, UBB]	[PSMA1, PSMA2, PSMA3, PSMA4, PSMA5, PSMA6, PSMA8, PSMB1, PSMB2, PSMB4, PSME2, UBC, VCP]	51.8519	48.1481	[GCLC, HSPA1A, PSMA1, PSMA2, PSMA3, PSMA4, PSMA5, PSMA6, PSMA8, PSMB1, PSMB2, PSMB3, PSMB4, PSMB6, PSMC2, PSMD13, PSMD2, PSMD4, PSME1, PSME2, PTK2, RACK1, RAD23A, RPS27A, UBB, UBC, VCP]
GO:1903321	negative regulation of protein modification by small protein conjugation or removal	GO_BiologicalProcess-EBI-QuickGO-GOA_20.11.2017_00h00	1.10534e-12	5.43827e-10	9.4939e-25	2.27854e-23	[6, 7, 8, 9]	Group25	15.1899	24	None Specific Cluster	[GCLC, HSPA1A, PLAA, PSMB3, PSMB6, PSMC2, PSMD13, PSMD2, PSMD4, PSME1, RPS27A, TRIM21, UBB]	[PSMA1, PSMA2, PSMA3, PSMA4, PSMA5, PSMA6, PSMB1, PSMB2, PSMB4, PSME2, UBC]	54.1667	45.8333	[GCLC, HSPA1A, PLAA, PSMA1, PSMA2, PSMA3, PSMA4, PSMA5, PSMA6, PSMB1, PSMB2, PSMB3, PSMB4, PSMB6, PSMC2, PSMD13, PSMD2, PSMD4, PSME1, PSME2, RPS27A, TRIM21, UBB, UBC]
GO:1903322	positive regulation of protein modification by small protein conjugation or removal	GO_BiologicalProcess-EBI-QuickGO-GOA_20.11.2017_00h00	1.33996e-15	7.23578e-13	9.4939e-25	2.27854e-23	[6, 7, 8, 9]	Group25	14.6919	31	None Specific Cluster	[ARRDC3, PSMB3, PSMB6, PSMC2, PSMD13, PSMD2, PSMD4, PSME1, PTK2, RAB1A, RPS27A, SART3, UBB, UBE2L3]	[DNAJA3, HSPA5, PSMA1, PSMA2, PSMA3, PSMA4, PSMA5, PSMA6, PSMA8, PSMB1, PSMB2, PSMB4, PSME2, SPHK1, UBC, VCP, WFS1]	45.1613	54.8387	[ARRDC3, DNAJA3, HSPA5, PSMA1, PSMA2, PSMA3, PSMA4, PSMA5, PSMA6, PSMA8, PSMB1, PSMB2, PSMB3, PSMB4, PSMB6, PSMC2, PSMD13, PSMD2, PSMD4, PSME1, PSME2, PTK2, RAB1A, RPS27A, SART3, SPHK1, UBB, UBC, UBE2L3, VCP, WFS1]
GO:0000375	RNA splicing, via transesterification reactions	GO_BiologicalProcess-EBI-QuickGO-GOA_20.11.2017_00h00	1.37328e-09	6.02869e-07	9.4939e-25	2.27854e-23	[7, 8, 9]	Group25	8.95522	30	Specific for Cluster #1	[ALYREF, DHX15, HNRNPK, HNRNPL, HNRNPR, HNRNPUL1, KHSRP, NCBP1, NONO, PRDX6, RBM8A, RBMX, SART3, SFPQ, SNRNP200, SNRPG, SNU13, SRSF3, SRSF6, WBP4]	[DBR1, HNRNPA1, HSPA8, LSM1, LSM4, SAP18, SNRPD3, SRSF1, SRSF2, SRSF4]	66.6667	33.3333	[ALYREF, DBR1, DHX15, HNRNPA1, HNRNPK, HNRNPL, HNRNPR, HNRNPUL1, HSPA8, KHSRP, LSM1, LSM4, NCBP1, NONO, PRDX6, RBM8A, RBMX, SAP18, SART3, SFPQ, SNRNP200, SNRPD3, SNRPG, SNU13, SRSF1, SRSF2, SRSF3, SRSF4, SRSF6, WBP4]
GO:0006511	ubiquitin-dependent protein catabolic process	GO_BiologicalProcess-EBI-QuickGO-GOA_20.11.2017_00h00	4.0317e-09	1.73766e-06	9.4939e-25	2.27854e-23	[7, 8, 9]	Group25	6.86767	41	None Specific Cluster	[CD2AP, DDB1, GCLC, HSPA1A, HUWE1, NPLOC4, PLAA, PSMB3, PSMB6, PSMC2, PSMD13, PSMD2, PSMD4, PSME1, PTK2, RACK1, RAD23A, RANBP1, RPS27A, SQSTM1, UBB, UBE2L3, USP19, YOD1]	[HSPA5, PSMA1, PSMA2, PSMA3, PSMA4, PSMA5, PSMA6, PSMA8, PSMB1, PSMB2, PSMB4, PSME2, RAD23B, UBC, UBR2, VCP, WFS1]	58.5366	41.4634	[CD2AP, DDB1, GCLC, HSPA1A, HSPA5, HUWE1, NPLOC4, PLAA, PSMA1, PSMA2, PSMA3, PSMA4, PSMA5, PSMA6, PSMA8, PSMB1, PSMB2, PSMB3, PSMB4, PSMB6, PSMC2, PSMD13, PSMD2, PSMD4, PSME1, PSME2, PTK2, RACK1, RAD23A, RAD23B, RANBP1, RPS27A, SQSTM1, UBB, UBC, UBE2L3, UBR2, USP19, VCP, WFS1, YOD1]
GO:0043161	proteasome-mediated ubiquitin-dependent protein catabolic process	GO_BiologicalProcess-EBI-QuickGO-GOA_20.11.2017_00h00	1.76414e-11	8.29146e-09	9.4939e-25	2.27854e-23	[6, 7, 8, 9, 10]	Group25	9.11392	36	None Specific Cluster	[CD2AP, DDB1, GCLC, HSPA1A, NPLOC4, PLAA, PSMB3, PSMB6, PSMC2, PSMD13, PSMD2, PSMD4, PSME1, RACK1, RAD23A, RPS27A, UBB, USP19, YOD1]	[HSPA5, PSMA1, PSMA2, PSMA3, PSMA4, PSMA5, PSMA6, PSMA8, PSMB1, PSMB2, PSMB4, PSME2, RAD23B, UBC, UBR2, VCP, WFS1]	52.7778	47.2222	[CD2AP, DDB1, GCLC, HSPA1A, HSPA5, NPLOC4, PLAA, PSMA1, PSMA2, PSMA3, PSMA4, PSMA5, PSMA6, PSMA8, PSMB1, PSMB2, PSMB3, PSMB4, PSMB6, PSMC2, PSMD13, PSMD2, PSMD4, PSME1, PSME2, RACK1, RAD23A, RAD23B, RPS27A, UBB, UBC, UBR2, USP19, VCP, WFS1, YOD1]
GO:0000184	nuclear-transcribed mRNA catabolic process, nonsense-mediated decay	GO_BiologicalProcess-EBI-QuickGO-GOA_20.11.2017_00h00	3.92874e-06	0.00144578	9.4939e-25	2.27854e-23	[7, 8, 9, 10]	Group25	10.8527	14	Specific for Cluster #1	[NCBP1, RBM8A, RPL12, RPL13, RPL7, RPL9, RPS11, RPS12, RPS20, RPS24, RPS27A]	[RPL22, RPL4, RPS18]	78.5714	21.4286	[NCBP1, RBM8A, RPL12, RPL13, RPL22, RPL4, RPL7, RPL9, RPS11, RPS12, RPS18, RPS20, RPS24, RPS27A]
GO:0002223	stimulatory C-type lectin receptor signaling pathway	GO_BiologicalProcess-EBI-QuickGO-GOA_20.11.2017_00h00	9.95876e-14	5.09888e-11	9.4939e-25	2.27854e-23	[6, 7, 8, 9, 10, 11]	Group25	17.8295	23	None Specific Cluster	[PSMB3, PSMB6, PSMC2, PSMD13, PSMD2, PSMD4, PSME1, RPS27A, UBB, UBE2V1]	[CD209, PSMA1, PSMA2, PSMA3, PSMA4, PSMA5, PSMA6, PSMA8, PSMB1, PSMB2, PSMB4, PSME2, UBC]	43.4783	56.5217	[CD209, PSMA1, PSMA2, PSMA3, PSMA4, PSMA5, PSMA6, PSMA8, PSMB1, PSMB2, PSMB3, PSMB4, PSMB6, PSMC2, PSMD13, PSMD2, PSMD4, PSME1, PSME2, RPS27A, UBB, UBC, UBE2V1]
GO:0031396	regulation of protein ubiquitination	GO_BiologicalProcess-EBI-QuickGO-GOA_20.11.2017_00h00	4.93661e-13	2.4683e-10	9.4939e-25	2.27854e-23	[7, 8, 9, 10]	Group25	11.5108	32	None Specific Cluster	[ARRDC3, GCLC, HSPA1A, PLAA, PSMB3, PSMB6, PSMC2, PSMD13, PSMD2, PSMD4, PSME1, PTK2, RAB1A, RPS27A, UBB, UBE2L3]	[DNAJA3, HSPA5, PSMA1, PSMA2, PSMA3, PSMA4, PSMA5, PSMA6, PSMA8, PSMB1, PSMB2, PSMB4, PSME2, SPHK1, UBC, WFS1]	50	50	[ARRDC3, DNAJA3, GCLC, HSPA1A, HSPA5, PLAA, PSMA1, PSMA2, PSMA3, PSMA4, PSMA5, PSMA6, PSMA8, PSMB1, PSMB2, PSMB3, PSMB4, PSMB6, PSMC2, PSMD13, PSMD2, PSMD4, PSME1, PSME2, PTK2, RAB1A, RPS27A, SPHK1, UBB, UBC, UBE2L3, WFS1]
GO:0043618	regulation of transcription from RNA polymerase II promoter in response to stress	GO_BiologicalProcess-EBI-QuickGO-GOA_20.11.2017_00h00	2.83328e-15	1.50731e-12	9.4939e-25	2.27854e-23	[5, 7, 8, 9, 10, 11, 12]	Group25	19.6721	24	None Specific Cluster	[HSPA1A, PSMB3, PSMB6, PSMC2, PSMD13, PSMD2, PSMD4, PSME1, RPS27A, UBB]	[HIF3A, HSPA5, PSMA1, PSMA2, PSMA3, PSMA4, PSMA5, PSMA6, PSMA8, PSMB1, PSMB2, PSMB4, PSME2, UBC]	41.6667	58.3333	[HIF3A, HSPA1A, HSPA5, PSMA1, PSMA2, PSMA3, PSMA4, PSMA5, PSMA6, PSMA8, PSMB1, PSMB2, PSMB3, PSMB4, PSMB6, PSMC2, PSMD13, PSMD2, PSMD4, PSME1, PSME2, RPS27A, UBB, UBC]
GO:0031145	anaphase-promoting complex-dependent catabolic process	GO_BiologicalProcess-EBI-QuickGO-GOA_20.11.2017_00h00	5.44287e-16	2.97725e-13	9.4939e-25	2.27854e-23	[7, 8, 9, 10, 11]	Group25	25.6098	21	None Specific Cluster	[PSMB3, PSMB6, PSMC2, PSMD13, PSMD2, PSMD4, PSME1, RPS27A, UBB]	[PSMA1, PSMA2, PSMA3, PSMA4, PSMA5, PSMA6, PSMA8, PSMB1, PSMB2, PSMB4, PSME2, UBC]	42.8571	57.1429	[PSMA1, PSMA2, PSMA3, PSMA4, PSMA5, PSMA6, PSMA8, PSMB1, PSMB2, PSMB3, PSMB4, PSMB6, PSMC2, PSMD13, PSMD2, PSMD4, PSME1, PSME2, RPS27A, UBB, UBC]
GO:0031146	SCF-dependent proteasomal ubiquitin-dependent protein catabolic process	GO_BiologicalProcess-EBI-QuickGO-GOA_20.11.2017_00h00	5.39855e-17	3.03939e-14	9.4939e-25	2.27854e-23	[7, 8, 9, 10, 11]	Group25	28.3784	21	None Specific Cluster	[PSMB3, PSMB6, PSMC2, PSMD13, PSMD2, PSMD4, PSME1, RPS27A, UBB]	[PSMA1, PSMA2, PSMA3, PSMA4, PSMA5, PSMA6, PSMA8, PSMB1, PSMB2, PSMB4, PSME2, UBC]	42.8571	57.1429	[PSMA1, PSMA2, PSMA3, PSMA4, PSMA5, PSMA6, PSMA8, PSMB1, PSMB2, PSMB3, PSMB4, PSMB6, PSMC2, PSMD13, PSMD2, PSMD4, PSME1, PSME2, RPS27A, UBB, UBC]
GO:0031398	positive regulation of protein ubiquitination	GO_BiologicalProcess-EBI-QuickGO-GOA_20.11.2017_00h00	5.39169e-15	2.85759e-12	9.4939e-25	2.27854e-23	[7, 8, 9, 10, 11]	Group25	15.1042	29	None Specific Cluster	[ARRDC3, PSMB3, PSMB6, PSMC2, PSMD13, PSMD2, PSMD4, PSME1, PTK2, RAB1A, RPS27A, UBB, UBE2L3]	[DNAJA3, HSPA5, PSMA1, PSMA2, PSMA3, PSMA4, PSMA5, PSMA6, PSMA8, PSMB1, PSMB2, PSMB4, PSME2, SPHK1, UBC, WFS1]	44.8276	55.1724	[ARRDC3, DNAJA3, HSPA5, PSMA1, PSMA2, PSMA3, PSMA4, PSMA5, PSMA6, PSMA8, PSMB1, PSMB2, PSMB3, PSMB4, PSMB6, PSMC2, PSMD13, PSMD2, PSMD4, PSME1, PSME2, PTK2, RAB1A, RPS27A, SPHK1, UBB, UBC, UBE2L3, WFS1]
GO:0042787	protein ubiquitination involved in ubiquitin-dependent protein catabolic process	GO_BiologicalProcess-EBI-QuickGO-GOA_20.11.2017_00h00	1.18166e-09	5.22296e-07	9.4939e-25	2.27854e-23	[8, 9, 10]	Group25	10.9589	24	None Specific Cluster	[DDB1, HUWE1, PSMB3, PSMB6, PSMC2, PSMD13, PSMD2, PSMD4, PSME1, PTK2, RPS27A, UBB]	[PSMA1, PSMA2, PSMA3, PSMA4, PSMA5, PSMA6, PSMA8, PSMB1, PSMB2, PSMB4, PSME2, UBC]	50	50	[DDB1, HUWE1, PSMA1, PSMA2, PSMA3, PSMA4, PSMA5, PSMA6, PSMA8, PSMB1, PSMB2, PSMB3, PSMB4, PSMB6, PSMC2, PSMD13, PSMD2, PSMD4, PSME1, PSME2, PTK2, RPS27A, UBB, UBC]
GO:0061418	regulation of transcription from RNA polymerase II promoter in response to hypoxia	GO_BiologicalProcess-EBI-QuickGO-GOA_20.11.2017_00h00	6.43206e-17	3.61482e-14	9.4939e-25	2.27854e-23	[5, 6, 7, 8, 9, 10, 11, 12, 13]	Group25	26.1905	22	None Specific Cluster	[PSMB3, PSMB6, PSMC2, PSMD13, PSMD2, PSMD4, PSME1, RPS27A, UBB]	[HIF3A, PSMA1, PSMA2, PSMA3, PSMA4, PSMA5, PSMA6, PSMA8, PSMB1, PSMB2, PSMB4, PSME2, UBC]	40.9091	59.0909	[HIF3A, PSMA1, PSMA2, PSMA3, PSMA4, PSMA5, PSMA6, PSMA8, PSMB1, PSMB2, PSMB3, PSMB4, PSMB6, PSMC2, PSMD13, PSMD2, PSMD4, PSME1, PSME2, RPS27A, UBB, UBC]
GO:0051443	positive regulation of ubiquitin-protein transferase activity	GO_BiologicalProcess-EBI-QuickGO-GOA_20.11.2017_00h00	1.18422e-16	6.58429e-14	9.4939e-25	2.27854e-23	[6, 8, 9, 10, 11, 12]	Group25	22.4299	24	None Specific Cluster	[ARRDC3, PSMB3, PSMB6, PSMC2, PSMD13, PSMD2, PSMD4, PSME1, RAB1A, RPS27A, UBB, UBE2L3]	[PSMA1, PSMA2, PSMA3, PSMA4, PSMA5, PSMA6, PSMA8, PSMB1, PSMB2, PSMB4, PSME2, UBC]	50	50	[ARRDC3, PSMA1, PSMA2, PSMA3, PSMA4, PSMA5, PSMA6, PSMA8, PSMB1, PSMB2, PSMB3, PSMB4, PSMB6, PSMC2, PSMD13, PSMD2, PSMD4, PSME1, PSME2, RAB1A, RPS27A, UBB, UBC, UBE2L3]
GO:0006614	SRP-dependent cotranslational protein targeting to membrane	GO_BiologicalProcess-EBI-QuickGO-GOA_20.11.2017_00h00	6.79586e-06	0.00243292	9.4939e-25	2.27854e-23	[7, 8, 9, 10, 11, 12]	Group25	12	12	Specific for Cluster #1	[RPL12, RPL13, RPL7, RPL9, RPS11, RPS12, RPS20, RPS24, RPS27A]	[RPL22, RPL4, RPS18]	75	25	[RPL12, RPL13, RPL22, RPL4, RPL7, RPL9, RPS11, RPS12, RPS18, RPS20, RPS24, RPS27A]
GO:2000060	positive regulation of protein ubiquitination involved in ubiquitin-dependent protein catabolic process	GO_BiologicalProcess-EBI-QuickGO-GOA_20.11.2017_00h00	6.76362e-16	3.67941e-13	9.4939e-25	2.27854e-23	[7, 8, 9, 10, 11, 12]	Group25	23.6559	22	None Specific Cluster	[PSMB3, PSMB6, PSMC2, PSMD13, PSMD2, PSMD4, PSME1, PTK2, RPS27A, UBB]	[PSMA1, PSMA2, PSMA3, PSMA4, PSMA5, PSMA6, PSMA8, PSMB1, PSMB2, PSMB4, PSME2, UBC]	45.4545	54.5455	[PSMA1, PSMA2, PSMA3, PSMA4, PSMA5, PSMA6, PSMA8, PSMB1, PSMB2, PSMB3, PSMB4, PSMB6, PSMC2, PSMD13, PSMD2, PSMD4, PSME1, PSME2, PTK2, RPS27A, UBB, UBC]
GO:0051436	negative regulation of ubiquitin-protein ligase activity involved in mitotic cell cycle	GO_BiologicalProcess-EBI-QuickGO-GOA_20.11.2017_00h00	6.46377e-16	3.52922e-13	9.4939e-25	2.27854e-23	[5, 6, 8, 10, 11, 12, 13, 14]	Group25	27.3973	20	None Specific Cluster	[PSMB3, PSMB6, PSMC2, PSMD13, PSMD2, PSMD4, PSME1, RPS27A, UBB]	[PSMA1, PSMA2, PSMA3, PSMA4, PSMA5, PSMA6, PSMB1, PSMB2, PSMB4, PSME2, UBC]	45	55	[PSMA1, PSMA2, PSMA3, PSMA4, PSMA5, PSMA6, PSMB1, PSMB2, PSMB3, PSMB4, PSMB6, PSMC2, PSMD13, PSMD2, PSMD4, PSME1, PSME2, RPS27A, UBB, UBC]
GO:0002495	antigen processing and presentation of peptide antigen via MHC class II	GO_ImmuneSystemProcess-EBI-QuickGO-GOA_20.11.2017_00h00	0.00899788	0.0269936	0.00899788	0.0269936	[3]	Group0	9.43396	10	Specific for Cluster #1	[ACTR1B, AP2S1, CLTA, DNM2, DYNC1H1, KIF15, PYCARD]	[CAPZB, CLTC, RAB7A]	70	30	[ACTR1B, AP2S1, CAPZB, CLTA, CLTC, DNM2, DYNC1H1, KIF15, PYCARD, RAB7A]
GO:0002366	leukocyte activation involved in immune response	GO_ImmuneSystemProcess-EBI-QuickGO-GOA_20.11.2017_00h00	0.00170362	0.00851808	0.00170362	0.00681446	[2, 3]	Group1	6.06469	45	Specific for Cluster #1	[ACTR1B, CAT, COPB1, DBNL, DLC1, DYNC1H1, EEF2, FRK, GDI2, HSPA1A, HUWE1, ILF2, IQGAP1, MGST1, MYDGF, NIT2, PRDX4, PRDX6, PRSS3, PSMC2, PSMD13, PSMD2, PYCARD, RAB5B, RAB5C, RIF1, SERPINB1, SERPINB6, SPTAN1, STAT6]	[ALAD, CDH17, FTH1, HLA-A, HSPA6, HSPA8, LGALS1, NME2, PGAM1, PSMA2, PSMA5, PSMB1, RAB7A, RAP2B, VCP]	66.6667	33.3333	[ACTR1B, ALAD, CAT, CDH17, COPB1, DBNL, DLC1, DYNC1H1, EEF2, FRK, FTH1, GDI2, HLA-A, HSPA1A, HSPA6, HSPA8, HUWE1, ILF2, IQGAP1, LGALS1, MGST1, MYDGF, NIT2, NME2, PGAM1, PRDX4, PRDX6, PRSS3, PSMA2, PSMA5, PSMB1, PSMC2, PSMD13, PSMD2, PYCARD, RAB5B, RAB5C, RAB7A, RAP2B, RIF1, SERPINB1, SERPINB6, SPTAN1, STAT6, VCP]
GO:0043312	neutrophil degranulation	GO_ImmuneSystemProcess-EBI-QuickGO-GOA_20.11.2017_00h00	2.88522e-05	0.000230817	0.00170362	0.00681446	[3, 5, 6]	Group1	7.47664	40	Specific for Cluster #1	[ACTR1B, CAT, COPB1, DBNL, DLC1, DYNC1H1, EEF2, FRK, GDI2, HSPA1A, HUWE1, ILF2, IQGAP1, MGST1, NIT2, PRDX4, PRDX6, PRSS3, PSMC2, PSMD13, PSMD2, PYCARD, RAB5B, RAB5C, SERPINB1, SERPINB6, SPTAN1]	[ALAD, FTH1, HLA-A, HSPA6, HSPA8, NME2, PGAM1, PSMA2, PSMA5, PSMB1, RAB7A, RAP2B, VCP]	67.5	32.5	[ACTR1B, ALAD, CAT, COPB1, DBNL, DLC1, DYNC1H1, EEF2, FRK, FTH1, GDI2, HLA-A, HSPA1A, HSPA6, HSPA8, HUWE1, ILF2, IQGAP1, MGST1, NIT2, NME2, PGAM1, PRDX4, PRDX6, PRSS3, PSMA2, PSMA5, PSMB1, PSMC2, PSMD13, PSMD2, PYCARD, RAB5B, RAB5C, RAB7A, RAP2B, SERPINB1, SERPINB6, SPTAN1, VCP]
GO:0002753	cytoplasmic pattern recognition receptor signaling pathway	GO_ImmuneSystemProcess-EBI-QuickGO-GOA_20.11.2017_00h00	0.0109903	0.0219805	0.0126665	0.025333	[5, 7, 8]	Group2	11.2903	7	Specific for Cluster #1	[CASP8, HSPA1A, NPLOC4, RPS27A, UBB, UBE2V1]	[UBC]	85.7143	14.2857	[CASP8, HSPA1A, NPLOC4, RPS27A, UBB, UBC, UBE2V1]
GO:0035666	TRIF-dependent toll-like receptor signaling pathway	GO_ImmuneSystemProcess-EBI-QuickGO-GOA_20.11.2017_00h00	0.00605952	0.0242381	0.0126665	0.025333	[7, 9, 10]	Group2	16.6667	5	Specific for Cluster #1	[CASP8, RPS27A, UBB]	[FADD, UBC]	60	40	[CASP8, FADD, RPS27A, UBB, UBC]
GO:0002478	antigen processing and presentation of exogenous peptide antigen	GO_ImmuneSystemProcess-EBI-QuickGO-GOA_20.11.2017_00h00	2.26017e-10	3.39025e-09	0.0291787	0.0291787	[3]	Group3	15.2174	28	None Specific Cluster	[ACTR1B, AP2S1, CLTA, DNM2, DYNC1H1, KIF15, PSMB3, PSMB6, PSMC2, PSMD13, PSMD2, PSMD4, PSME1]	[CAPZB, CLTC, HLA-A, PSMA1, PSMA2, PSMA3, PSMA4, PSMA5, PSMA6, PSMA8, PSMB1, PSMB2, PSMB4, PSME2, RAB7A]	46.4286	53.5714	[ACTR1B, AP2S1, CAPZB, CLTA, CLTC, DNM2, DYNC1H1, HLA-A, KIF15, PSMA1, PSMA2, PSMA3, PSMA4, PSMA5, PSMA6, PSMA8, PSMB1, PSMB2, PSMB3, PSMB4, PSMB6, PSMC2, PSMD13, PSMD2, PSMD4, PSME1, PSME2, RAB7A]
GO:0045088	regulation of innate immune response	GO_ImmuneSystemProcess-EBI-QuickGO-GOA_20.11.2017_00h00	0.000111311	0.000779176	0.0291787	0.0291787	[3]	Group3	7.64045	34	None Specific Cluster	[CASP8, FLOT1, HSPA1A, NONO, NPLOC4, PSMB3, PSMB6, PSMC2, PSMD13, PSMD2, PSMD4, PSME1, PYCARD, RPS27A, SAMHD1, SFPQ, UBB, UBE2V1]	[CD209, DNAJA3, FADD, HLA-A, PSMA1, PSMA2, PSMA3, PSMA4, PSMA5, PSMA6, PSMA8, PSMB1, PSMB2, PSMB4, PSME2, UBC]	52.9412	47.0588	[CASP8, CD209, DNAJA3, FADD, FLOT1, HLA-A, HSPA1A, NONO, NPLOC4, PSMA1, PSMA2, PSMA3, PSMA4, PSMA5, PSMA6, PSMA8, PSMB1, PSMB2, PSMB3, PSMB4, PSMB6, PSMC2, PSMD13, PSMD2, PSMD4, PSME1, PSME2, PYCARD, RPS27A, SAMHD1, SFPQ, UBB, UBC, UBE2V1]
GO:0002218	activation of innate immune response	GO_ImmuneSystemProcess-EBI-QuickGO-GOA_20.11.2017_00h00	1.06502e-06	1.27803e-05	0.0291787	0.0291787	[2, 4, 5]	Group3	9.81013	31	None Specific Cluster	[CASP8, FLOT1, HSPA1A, NONO, NPLOC4, PSMB3, PSMB6, PSMC2, PSMD13, PSMD2, PSMD4, PSME1, PYCARD, RPS27A, SFPQ, UBB, UBE2V1]	[CD209, FADD, PSMA1, PSMA2, PSMA3, PSMA4, PSMA5, PSMA6, PSMA8, PSMB1, PSMB2, PSMB4, PSME2, UBC]	54.8387	45.1613	[CASP8, CD209, FADD, FLOT1, HSPA1A, NONO, NPLOC4, PSMA1, PSMA2, PSMA3, PSMA4, PSMA5, PSMA6, PSMA8, PSMB1, PSMB2, PSMB3, PSMB4, PSMB6, PSMC2, PSMD13, PSMD2, PSMD4, PSME1, PSME2, PYCARD, RPS27A, SFPQ, UBB, UBC, UBE2V1]
GO:0002244	hematopoietic progenitor cell differentiation	GO_ImmuneSystemProcess-EBI-QuickGO-GOA_20.11.2017_00h00	5.24681e-07	6.82085e-06	0.0291787	0.0291787	[4]	Group3	12.9412	22	None Specific Cluster	[EEF2, PSMB3, PSMB6, PSMC2, PSMD13, PSMD2, PSMD4, PSME1, RPS27A, UBB]	[PSMA1, PSMA2, PSMA3, PSMA4, PSMA5, PSMA6, PSMA8, PSMB1, PSMB2, PSMB4, PSME2, UBC]	45.4545	54.5455	[EEF2, PSMA1, PSMA2, PSMA3, PSMA4, PSMA5, PSMA6, PSMA8, PSMB1, PSMB2, PSMB3, PSMB4, PSMB6, PSMC2, PSMD13, PSMD2, PSMD4, PSME1, PSME2, RPS27A, UBB, UBC]
GO:0002758	innate immune response-activating signal transduction	GO_ImmuneSystemProcess-EBI-QuickGO-GOA_20.11.2017_00h00	1.22447e-05	0.000110203	0.0291787	0.0291787	[3, 5, 6]	Group3	9.39597	28	None Specific Cluster	[CASP8, FLOT1, HSPA1A, NPLOC4, PSMB3, PSMB6, PSMC2, PSMD13, PSMD2, PSMD4, PSME1, RPS27A, UBB, UBE2V1]	[CD209, FADD, PSMA1, PSMA2, PSMA3, PSMA4, PSMA5, PSMA6, PSMA8, PSMB1, PSMB2, PSMB4, PSME2, UBC]	50	50	[CASP8, CD209, FADD, FLOT1, HSPA1A, NPLOC4, PSMA1, PSMA2, PSMA3, PSMA4, PSMA5, PSMA6, PSMA8, PSMB1, PSMB2, PSMB3, PSMB4, PSMB6, PSMC2, PSMD13, PSMD2, PSMD4, PSME1, PSME2, RPS27A, UBB, UBC, UBE2V1]
GO:0002479	antigen processing and presentation of exogenous peptide antigen via MHC class I, TAP-dependent	GO_ImmuneSystemProcess-EBI-QuickGO-GOA_20.11.2017_00h00	1.06259e-10	1.70014e-09	0.0291787	0.0291787	[5]	Group3	23.75	19	Specific for Cluster #2	[PSMB3, PSMB6, PSMC2, PSMD13, PSMD2, PSMD4, PSME1]	[HLA-A, PSMA1, PSMA2, PSMA3, PSMA4, PSMA5, PSMA6, PSMA8, PSMB1, PSMB2, PSMB4, PSME2]	36.8421	63.1579	[HLA-A, PSMA1, PSMA2, PSMA3, PSMA4, PSMA5, PSMA6, PSMA8, PSMB1, PSMB2, PSMB3, PSMB4, PSMB6, PSMC2, PSMD13, PSMD2, PSMD4, PSME1, PSME2]
GO:0038093	Fc receptor signaling pathway	GO_ImmuneSystemProcess-EBI-QuickGO-GOA_20.11.2017_00h00	9.74467e-06	9.74467e-05	0.0291787	0.0291787	[5]	Group3	9.81132	26	None Specific Cluster	[ACTG1, PSMB3, PSMB6, PSMC2, PSMD13, PSMD2, PSMD4, PSME1, PTK2, RPS27A, UBB, UBE2V1]	[ACTB, CALM1, PSMA1, PSMA2, PSMA3, PSMA4, PSMA5, PSMA6, PSMA8, PSMB1, PSMB2, PSMB4, PSME2, UBC]	46.1538	53.8462	[ACTB, ACTG1, CALM1, PSMA1, PSMA2, PSMA3, PSMA4, PSMA5, PSMA6, PSMA8, PSMB1, PSMB2, PSMB3, PSMB4, PSMB6, PSMC2, PSMD13, PSMD2, PSMD4, PSME1, PSME2, PTK2, RPS27A, UBB, UBC, UBE2V1]
GO:1902036	regulation of hematopoietic stem cell differentiation	GO_ImmuneSystemProcess-EBI-QuickGO-GOA_20.11.2017_00h00	1.9881e-12	3.37976e-11	0.0291787	0.0291787	[4, 6]	Group3	25.6098	21	None Specific Cluster	[PSMB3, PSMB6, PSMC2, PSMD13, PSMD2, PSMD4, PSME1, RPS27A, UBB]	[PSMA1, PSMA2, PSMA3, PSMA4, PSMA5, PSMA6, PSMA8, PSMB1, PSMB2, PSMB4, PSME2, UBC]	42.8571	57.1429	[PSMA1, PSMA2, PSMA3, PSMA4, PSMA5, PSMA6, PSMA8, PSMB1, PSMB2, PSMB3, PSMB4, PSMB6, PSMC2, PSMD13, PSMD2, PSMD4, PSME1, PSME2, RPS27A, UBB, UBC]
GO:0050851	antigen receptor-mediated signaling pathway	GO_ImmuneSystemProcess-EBI-QuickGO-GOA_20.11.2017_00h00	0.000310479	0.00186287	0.0291787	0.0291787	[4, 6, 7]	Group3	8.51064	24	None Specific Cluster	[EZR, PSMB3, PSMB6, PSMC2, PSMD13, PSMD2, PSMD4, PSME1, RPS27A, UBB, UBE2V1]	[AGRN, PSMA1, PSMA2, PSMA3, PSMA4, PSMA5, PSMA6, PSMA8, PSMB1, PSMB2, PSMB4, PSME2, UBC]	45.8333	54.1667	[AGRN, EZR, PSMA1, PSMA2, PSMA3, PSMA4, PSMA5, PSMA6, PSMA8, PSMB1, PSMB2, PSMB3, PSMB4, PSMB6, PSMC2, PSMD13, PSMD2, PSMD4, PSME1, PSME2, RPS27A, UBB, UBC, UBE2V1]
GO:0038095	Fc-epsilon receptor signaling pathway	GO_ImmuneSystemProcess-EBI-QuickGO-GOA_20.11.2017_00h00	1.37489e-06	1.51238e-05	0.0291787	0.0291787	[6]	Group3	11.8557	23	None Specific Cluster	[PSMB3, PSMB6, PSMC2, PSMD13, PSMD2, PSMD4, PSME1, RPS27A, UBB, UBE2V1]	[CALM1, PSMA1, PSMA2, PSMA3, PSMA4, PSMA5, PSMA6, PSMA8, PSMB1, PSMB2, PSMB4, PSME2, UBC]	43.4783	56.5217	[CALM1, PSMA1, PSMA2, PSMA3, PSMA4, PSMA5, PSMA6, PSMA8, PSMB1, PSMB2, PSMB3, PSMB4, PSMB6, PSMC2, PSMD13, PSMD2, PSMD4, PSME1, PSME2, RPS27A, UBB, UBC, UBE2V1]
GO:0002223	stimulatory C-type lectin receptor signaling pathway	GO_ImmuneSystemProcess-EBI-QuickGO-GOA_20.11.2017_00h00	4.78487e-10	6.69881e-09	0.0291787	0.0291787	[5, 7, 8]	Group3	17.8295	23	None Specific Cluster	[PSMB3, PSMB6, PSMC2, PSMD13, PSMD2, PSMD4, PSME1, RPS27A, UBB, UBE2V1]	[CD209, PSMA1, PSMA2, PSMA3, PSMA4, PSMA5, PSMA6, PSMA8, PSMB1, PSMB2, PSMB4, PSME2, UBC]	43.4783	56.5217	[CD209, PSMA1, PSMA2, PSMA3, PSMA4, PSMA5, PSMA6, PSMA8, PSMB1, PSMB2, PSMB3, PSMB4, PSMB6, PSMC2, PSMD13, PSMD2, PSMD4, PSME1, PSME2, RPS27A, UBB, UBC, UBE2V1]
