# Supplementary material for: Rainbow Trout Red Blood Cells Exposed to Viral Hemorrhagic Septicemia Virus Up-Regulate Antigen-Processing Mechanisms and MHC I&II, CD86, and CD83 Antigen-presenting Cell Markers
Source: Cells. 2019 Apr 27;8(5):386. doi: 10.3390/cells8050386 (PMC6562805; doi:10.3390/cells8050386)
Supplement: Supplementary file 1 [file cells-08-00386-s001.zip › Supplementary Table S4.xlsx]

## Sheet: PROTEOMICS 72h FDR<0,001
Main Accession	GENE SYMBOL	PROTEIN DESCRIPTION	Log2FC	FDR
A0A060Y4P9	TBC1D17	TBC1 domain family member 17	14.3259	0
A0A146PVM6	ZMYM4	zinc finger MYM-type containing 4	13.9582	0
A0A0F6Y5M7	IQGAP1	IQ motif containing GTPase activating protein 1	13.5259	0
H3CRI4	NOP2	NOP2 nucleolar protein	13.2833	0
Q4RHV2	TNXB	tenascin XB	12.3049	0
E7F5R3	ANKRD11	ankyrin repeat domain 11	11.6465	0
A0A146V5Z5	DOP1B	DOP1 leucine zipper like protein B	11.3576	0
A0A0S7GKE8	SPTAN1	spectrin alpha, non-erythrocytic 1	10.9547	0
F1QVS3	SEPT8	septin 8	10.9472	0
H2N2Z7	RIF1	replication timing regulatory factor 1	10.808	0
A0A1A8AH70	P3H1	prolyl 3-hydroxylase 1	10.5116	0
A0A0S7L205	TJP3	tight junction protein 3	10.1131	0
A0A146WT59	DLC1	DLC1 Rho GTPase activating protein	10.0759	0
A0A087Y479	PRDX1	peroxiredoxin 1	9.67738	0
A0A0R4I9B2	PAFAH1B1	platelet activating factor acetylhydrolase 1b regulatory subunit 1	9.66373	0
A0A0G2KZ36	KYAT3	kynurenine aminotransferase 3	9.54236	0
H2TCL6	SUMO3	small ubiquitin-like modifier 3	9.26686	0
P17032	ZNF37A	zinc finger protein 37A	9.09758	0
A0A0M5MSF5	MGST1	microsomal glutathione S-transferase 1	8.80663	0
Q96PN8	TSSK3	testis specific serine kinase 3	8.71562	0
A0A060XD83	CIRBP	cold inducible RNA binding protein	8.70121	0
G3PJ14	LAMA3	laminin subunit alpha 3	8.57031	0
A0A146WRG5	TTLL7	tubulin tyrosine ligase like 7	8.5572	0
M4AD85	HMBS	hydroxymethylbilane synthase	8.54946	0
E7FB91	PI16	peptidase inhibitor 16	8.50416	0
C1BG55	TMEM14C	transmembrane protein 14C	8.49039	0
A0A0P7UKK1	MDH1	malate dehydrogenase 1	8.46359	0
A0A0P7VB23	CYP2J2	cytochrome P450 family 2 subfamily J member 2	8.45315	0
A0A060XQQ1	HNRNPR	heterogeneous nuclear ribonucleoprotein R	8.32399	0
A0A0S7ENP0	USP19	ubiquitin specific peptidase 19	8.28668	0
A0A1A7WNI6	MDGA1	MAM domain containing glycosylphosphatidylinositol anchor 1	8.28027	0
A0A1A7X5W4	MPDZ	multiple PDZ domain crumbs cell polarity complex component	8.15567	0
M4A2D0	MRC2	mannose receptor C type 2	8.10654	0
A0A0P7XT35	RBM6	RNA binding motif protein 6	7.97735	0
A0A060VYM0	ETFB	electron transfer flavoprotein subunit beta	7.92309	0
I3JWV1	FBXW8	F-box and WD repeat domain containing 8	7.87015	0
H2T9W4	MTCL1	microtubule crosslinking factor 1	7.81365	0
A0A060WUW9	ZNF326	zinc finger protein 326	7.81365	0
F1QPU4	AP5B1	adaptor related protein complex 5 subunit beta 1	7.736	0
H2SSA0	PKD1L2	polycystin 1 like 2 (gene/pseudogene)	7.67565	0
F1RBQ7	RLF	rearranged L-myc fusion	7.66925	0
C9JN71	ZNF878	zinc finger protein 878	7.66	0
A0A060W0R3	ACTA1	actin, alpha 1, skeletal muscle	7.60706	0
A0A0P7YDZ9	SYN1	synapsin I	7.58215	0
F1R9A9	SERPINB1	serpin family B member 1	7.56463	0
H0YJS4	EIF2S1	eukaryotic translation initiation factor 2 subunit alpha	7.53872	0
A0A1A8F451	AGO3	argonaute 3, RISC catalytic component	7.52527	0
A0A087Y318	CD2AP	CD2 associated protein	7.49574	0
C1BKB6	ADK	adenosine kinase	7.43729	0
E1CJK4	ATP1B1	ATPase Na+/K+ transporting subunit beta 1	7.42525	0
G3NL92	HP1BP3	heterochromatin protein 1 binding protein 3	7.38423	0
A0A146YNG8	EIF5A	eukaryotic translation initiation factor 5A	7.35366	0
C1BZS2	WDR82	WD repeat domain 82	7.34924	0
H0YEG8	Nucb2	nucleobindin 2	7.33222	0
A0A060XLJ8	NDRG2	NDRG family member 2	7.28522	0
A0A060WFE2	HUWE1	HECT, UBA and WWE domain containing 1, E3 ubiquitin protein ligase	7.28036	0
Q4RS16	LARP1	La ribonucleoprotein domain family member 1	7.21084	0
A0A060XYL7	HSPA4	heat shock protein family A (Hsp70) member 4	7.20693	0
A0A060X4G3	SNURF	SNRPN upstream reading frame	7.19877	0
A0A0P7X8S5	PPP1R10	protein phosphatase 1 regulatory subunit 10	7.1474	0
G3M5G5	VDAC1	voltage dependent anion channel 1	7.11017	0
A0A0H3W5W9	PTGIS	prostaglandin I2 synthase	7.05804	0
V5LVI3	NOS1	nitric oxide synthase 1	7.04864	0
A0A060ZAC2	TKTL2	transketolase like 2	7.02954	0
A0A060WF02	ARRDC3	arrestin domain containing 3	6.87063	0
G3Q8K2	MARK2	microtubule affinity regulating kinase 2	6.849	0
C1BXH0	MMAB	methylmalonic aciduria (cobalamin deficiency) cblB type	6.83404	0
F1QFC0	HSPA9	heat shock protein family A (Hsp70) member 9	6.79123	0
A0A146NQS2	MYH10	myosin heavy chain 10	6.77735	0
A0A146N284	ITPRID2	ITPR interacting domain containing 2	6.74095	0
A0A1A8BR34	SCAF1	SR-related CTD associated factor 1	6.73454	0
Q4S1L5	MYO3A	myosin IIIA	6.69993	0
C7DY49	PRSS1	serine protease 1	6.65179	0
G3LUK8	PRSS3	serine protease 3	6.65179	0
C0H8B2	TPT1	tumor protein, translationally-controlled 1	6.65109	0
W5LBV7	CCDC80	coiled-coil domain containing 80	6.6489	0
A0A1A8EJ78	NFKBIZ	NFKB inhibitor zeta	6.64082	0
A0A060W5M8	NCBP1	nuclear cap binding protein subunit 1	6.59451	0
A0A0F8ATZ1	GDI2	GDP dissociation inhibitor 2	6.58574	0
A0A060XE47	TOP1	DNA topoisomerase I	6.55853	0
E1U5T6	GPX2	glutathione peroxidase 2	6.54017	0
A0A060VQ42	CORO1C	coronin 1C	6.53168	0
A0A0P7UQR7	FLOT1	flotillin 1	6.51363	0
A0A060YNK0	DMTN	dematin actin binding protein	6.50774	0
B4YY57	RAG1	recombination activating 1	6.49117	0
A0A060XKZ9	ESYT1	extended synaptotagmin 1	6.48282	0
G8G922	EEF2	eukaryotic translation elongation factor 2	6.44392	0
A0A060YG48	TXNL1	thioredoxin like 1	6.43626	0
A0A060Y771	NAP1L1	nucleosome assembly protein 1 like 1	6.38581	0
A0A060XUA7	CASP8	caspase 8	6.32978	0
Q4RS02	CCT6A	chaperonin containing TCP1 subunit 6A	6.29114	0
C3KI15	RPL13	ribosomal protein L13	6.28111	0
A0A067Y0J3	ACTG1	actin gamma 1	6.27612	0
B5XA68	ALYREF	Aly/REF export factor	6.22024	0
A0A060W5K6	RAB1A	RAB1A, member RAS oncogene family	6.17781	0
A0A060XV54	TNIK	TRAF2 and NCK interacting kinase	6.16197	0
W5LL83	GNB3	G protein subunit beta 3	6.02126	0
E7F6T1	GUCY1B2	guanylate cyclase 1 soluble subunit beta 2 (pseudogene)	6.01229	0
A0A146Y7N8	CLIP1	CAP-Gly domain containing linker protein 1	5.98484	0
H2MT83	FUBP3	far upstream element binding protein 3	5.98144	0
A0A0P7TNK1	COPB2	coatomer protein complex subunit beta 2	5.96903	0
C9JX95	TSC2	TSC complex subunit 2	5.95175	0
A0A060YIA9	Gig2l	Grass carp reovirus (GCRV)-induced gene 2l	5.94919	0
C1BEI0	EIF3M	eukaryotic translation initiation factor 3 subunit M	5.94366	0
Q4SM69	PANX2	pannexin 2	5.93687	0
A0A060YDC3	GARS	glycyl-tRNA synthetase	5.92951	0
A0A1K0ISV8	CAT	catalase	5.91331	0
A0A146NMA3	CA2	carbonic anhydrase 2	5.90788	0
A0A0P7V984	MYH9	myosin heavy chain 9	5.87609	0
A0A060W950	PSMD4	proteasome 26S subunit, non-ATPase 4	5.82947	0
A0A060X6H2	RSL1D1	ribosomal L1 domain containing 1	5.81196	0
A0A060Y1V1	YWHAB	tyrosine 3-monooxygenase/tryptophan 5-monooxygenase activation protein beta	5.78693	0
A0A060WZJ8	AP2S1	adaptor related protein complex 2 subunit sigma 1	5.74625	0
A0A0F8C8K1	EZR	ezrin	5.73597	0
W5S0B3	PSME1	proteasome activator subunit 1	5.73124	0
H2RLY4	CCNE1	cyclin E1	5.72936	0
A0A060XG70	RBM4B	RNA binding motif protein 4B	5.69525	0
A0A146RQX7	COPS7A	COP9 signalosome subunit 7A	5.69475	0
A0A0F8AL64	RPS24	ribosomal protein S24	5.67377	0
A0A060YNX3	WBP4	WW domain binding protein 4	5.64344	9.25186e-16
G3Q2N7	PRPS1	phosphoribosyl pyrophosphate synthetase 1	5.6297	0
A0A0B4KJJ6	ACAA2	acetyl-CoA acyltransferase 2	5.58835	0
A0A1A8HJ08	ERH	ERH, mRNA splicing and mitosis factor	5.57327	2.71465e-15
Q0IIM8	TBC1D8B	TBC1 domain family member 8B	5.5321	5.34552e-15
G3NFY8	ATP6V1A	ATPase H+ transporting V1 subunit A	5.43267	0
A0A060XFE1	DYNC1H1	dynein cytoplasmic 1 heavy chain 1	5.4311	0
A0A0P7TDM8	CPOX	coproporphyrinogen oxidase	5.38272	2.73286e-14
A0A146ZP10	PRKAG3	protein kinase AMP-activated non-catalytic subunit gamma 3	5.36615	0
H2LX03	WARS2	tryptophanyl tRNA synthetase 2, mitochondrial	5.3652	3.31108e-14
H3DPJ8	BLM	Bloom syndrome RecQ like helicase	5.36008	3.55532e-14
G3N4U4	MYH7	myosin heavy chain 7	5.34808	4.03953e-14
A0A060Y1D4	PTK2	protein tyrosine kinase 2	5.34808	4.05134e-14
C1BFZ3	FKBP1B	FK506 binding protein 1B	5.3236	0
A0A146MW39	DNM2	dynamin 2	5.31758	0
A0A060WRB8	TPI1	triosephosphate isomerase 1	5.31447	5.87241e-14
J7GUU7	POMGNT2	protein O-linked mannose N-acetylglucosaminyltransferase 2 (beta 1,4-)	5.27816	8.7004e-14
B5XB66	SNRPG	small nuclear ribonucleoprotein polypeptide G	5.26154	0
A0A0F8AVH1	NNT	nicotinamide nucleotide transhydrogenase	5.26017	1.04459e-13
A0A060W1X3	SSRP1	structure specific recognition protein 1	5.24744	0
A0A0P7U8K4	GSTM3	glutathione S-transferase mu 3	5.17745	2.57703e-13
C0PU58	P4HB	prolyl 4-hydroxylase subunit beta	5.15372	0
A0A0P7USI9	LIMK2	LIM domain kinase 2	5.14533	5.48548e-12
A0A060Y0N8	PREB	prolactin regulatory element binding	5.14292	0
A0A060W964	SQSTM1	sequestosome 1	5.12851	0
A0A146MN50	CRYL1	crystallin lambda 1	5.12336	4.59125e-13
A0A060Y8N1	PTER	phosphotriesterase related	5.10915	5.31581e-13
A0A0P7X5M1	PRDX6	peroxiredoxin 6	5.09368	6.25674e-13
B5X4A4	PLAA	phospholipase A2 activating protein	5.08031	0
A0A060YNQ8	EEF1B2	eukaryotic translation elongation factor 1 beta 2	5.06833	0
A0A060XQS3	OXSR1	oxidative stress responsive 1	5.02726	0
I3KGK5	RPS27A	ribosomal protein S27a	5.02561	1.27834e-12
A0A060X502	AQP1	aquaporin 1 (Colton blood group)	5.00308	0
A0A060W655	VDAC2	voltage dependent anion channel 2	4.97572	0
W5KSB9	LBR	lamin B receptor	4.96156	0
A0A060XCG9	NIT2	nitrilase family member 2	4.85981	7.25148e-12
A0A060YG13	RAD23A	RAD23 homolog A, nucleotide excision repair protein	4.84508	8.3989e-12
A0A0U1RRK1	MICU1	mitochondrial calcium uptake 1	4.84324	0
A0A087Y7K7	UROD	uroporphyrinogen decarboxylase	4.84166	8.68403e-12
A0A060Y8R5	COPB1	coatomer protein complex subunit beta 1	4.82646	0
A0A060VVD3	EIF4A2	eukaryotic translation initiation factor 4A2	4.81344	1.14868e-11
Q98TL2	HSPA1A	heat shock protein family A (Hsp70) member 1A	4.73982	0
I3KFI5	CFAP58	cilia and flagella associated protein 58	4.73831	2.42886e-11
A0A060YI16	TWF1	twinfilin actin binding protein 1	4.72606	0
A0A060YIQ9	SHROOM3	shroom family member 3	4.69027	3.87997e-11
B5X173	SFPQ	splicing factor proline and glutamine rich	4.6804	0
A0A060W7X0	GCLC	glutamate-cysteine ligase catalytic subunit	4.63456	6.73861e-11
A0A087Y3T2	RIDA	reactive intermediate imine deaminase A homolog	4.61268	8.32839e-11
A0A060WGR2	LDHB	lactate dehydrogenase B	4.61089	8.4596e-11
W5LQ08	SPTBN4	spectrin beta, non-erythrocytic 4	4.58576	0
Q13185	CBX3	chromobox 3	4.56132	0
H2UL08	PPP6R2	protein phosphatase 6 regulatory subunit 2	4.50933	2.23674e-10
A0A060WDJ8	MYDGF	myeloid derived growth factor	4.50694	2.28451e-10
A0A060VSF2	CLTA	clathrin light chain A	4.5065	2.28937e-10
A0A060X0G4	HSPA2	heat shock protein family A (Hsp70) member 2	4.48064	2.93065e-10
C1BI68	SRSF3	serine and arginine rich splicing factor 3	4.46259	0
A0A060WHI0	NPEPPS	aminopeptidase puromycin sensitive	4.45811	3.62798e-10
C0H983	ADD2	adducin 2	4.44506	0
A0A060WPE5	PSMB3	proteasome subunit beta 3	4.44145	0
A2VCZ5	MED13	mediator complex subunit 13	4.43662	4.41378e-10
A0A060WND7	ARHGDIA	Rho GDP dissociation inhibitor alpha	4.42715	4.82297e-10
A0A060XZJ6	NAMPT	nicotinamide phosphoribosyltransferase	4.41448	5.4212e-10
F4Y572	UBB	ubiquitin B	4.38622	0
A0A060Y3T6	HNRNPAB	heterogeneous nuclear ribonucleoprotein A/B	4.34686	0
A6MWU2	RPS11	ribosomal protein S11	4.33978	0
A0A060WDA9	EIF4H	eukaryotic translation initiation factor 4H	4.31534	1.34054e-09
A0A060WRK8	HDGF	heparin binding growth factor	4.31505	1.3415e-09
A0A060WXP3	MGST3	microsomal glutathione S-transferase 3	4.11536	0
A0A0P7TY68	RBM8A	RNA binding motif protein 8A	4.07429	1.14916e-08
A0A060YF84	PRSS16	serine protease 16	4.04867	1.43438e-08
C1BXW2	CFL2	cofilin 2	4.01687	0
A0A060YLL3	FRK	fyn related Src family tyrosine kinase	4.00057	0
H7C1H2	PSMD2	proteasome 26S subunit, non-ATPase 2	3.98183	0
A0A0P7X0J8	DNM1	dynamin 1	3.98036	0
A0A060Y9K3	RACK1	receptor for activated C kinase 1	3.95005	3.32994e-08
C0H907	LARS	leucyl-tRNA synthetase	3.94242	0
B5X3M6	EPHX2	epoxide hydrolase 2	3.94213	3.55707e-08
A0A060W8Y7	NONO	non-POU domain containing octamer binding	3.9113	0
Q6DEH6	KIF15	kinesin family member 15	3.88714	0
C4NF89	RPS20	ribosomal protein S20	3.87173	0
C1BFM5	GSTO1	glutathione S-transferase omega 1	3.86478	6.81305e-08
A0A060YXE3	TRIM21	tripartite motif containing 21	3.85011	0
A0A060XKR8	GSTK1	glutathione S-transferase kappa 1	3.83719	0
I3JYY5	AARS	alanyl-tRNA synthetase	3.82985	9.0536e-08
A0A1A7ZE16	PRDX4	peroxiredoxin 4	3.81983	0
J3KN67	TPM1	tropomyosin 1	3.79747	1.18189e-07
A0A060WUM7	SBK1	SH3 domain binding kinase 1	3.77667	1.41592e-06
O13019	RPS12	ribosomal protein S12	3.77187	0
C1BXR5	PRDX3	peroxiredoxin 3	3.75842	1.62271e-07
A0A060XEY9	PSMB6	proteasome subunit beta 6	3.73214	2.00257e-07
A0A060X6R4	SNU13	small nuclear ribonucleoprotein 13	3.72895	0
H3CFH6	EIF4A1	eukaryotic translation initiation factor 4A1	3.71554	0
A0A1A8AEH2	WLS	wntless Wnt ligand secretion mediator	3.69961	0
A0A1A8R6L9	SAMHD1	SAM and HD domain containing deoxynucleoside triphosphate triphosphohydrolase 1	3.67513	0
A0A060W8W0	ATP8B2	ATPase phospholipid transporting 8B2	3.65535	3.60407e-06
A0A146YUU1	DOCK9	dedicator of cytokinesis 9	3.63225	0
A0A060WYX9	RANBP1	RAN binding protein 1	3.63145	4.41319e-07
A0A060XFM4	RHAG	Rh associated glycoprotein	3.61044	0
A0A146ZGJ1	TARDBP	TAR DNA binding protein	3.56839	6.28625e-06
A0A060WFM5	EIF2S2	eukaryotic translation initiation factor 2 subunit beta	3.56797	0
A0A060X623	QARS	glutaminyl-tRNA synthetase	3.54131	0
A0A0F8CNX0	HNRNPL	heterogeneous nuclear ribonucleoprotein L	3.54058	0
A0A060X9B2	TRIM35	tripartite motif containing 35	3.54032	0
A0A060Z998	BLVRA	biliverdin reductase A	3.49894	2.73809e-15
I3KHI5	AGO1	argonaute 1, RISC catalytic component	3.44625	5.44216e-15
A0P898	TGM2	transglutaminase 2	3.44575	5.40857e-15
E9QH22	NT5C2	5'-nucleotidase, cytosolic II	3.44084	5.37539e-15
A0A060WQQ3	GLO1	glyoxalase I	3.43777	1.89029e-06
W5LYT0	API5	apoptosis inhibitor 5	3.43737	7.86995e-15
H2TSL5	ILF3	interleukin enhancer binding factor 3	3.42832	7.82311e-15
A0A060W4C7	GLRX	glutaredoxin	3.40554	2.37135e-06
A0A060VNA2	ACTR1B	ARP1 actin related protein 1 homolog B	3.36955	2.56195e-14
A0A060XQS1	CBX5	chromobox 5	3.35774	3.05647e-14
A0A060XV24	PTGR2	prostaglandin reductase 2	3.35398	3.43423e-06
A0A060XNT3	PDCD5	programmed cell death 5	3.33514	3.3743e-05
A0A060VLZ9	DDB1	damage specific DNA binding protein 1	3.32249	4.29207e-06
A0A060W170	AKR1A1	aldo-keto reductase family 1 member A1	3.28479	5.61681e-06
A0A060WSD8	HNRNPUL1	heterogeneous nuclear ribonucleoprotein U like 1	3.27887	1.36904e-13
C1BFI3	PYCARD	PYD and CARD domain containing	3.27709	5.92596e-06
A0A146ZJ34	ETV3L	ETS variant 3 like	3.26374	5.44799e-05
H2MTV7	EEF1D	eukaryotic translation elongation factor 1 delta	3.25401	2.12928e-13
A0A060XSV9	TBCA	tubulin folding cofactor A	3.23883	7.74552e-06
C0HB83	PURB	purine rich element binding protein B	3.1924	6.65612e-13
O57655	G6PD	glucose-6-phosphate dehydrogenase	3.1808	8.20824e-13
A0A060XSE1	NCL	nucleolin	3.16766	1.03898e-12
B0S754	SNRNP200	small nuclear ribonucleoprotein U5 subunit 200	3.13536	1.86428e-12
Q4RUG7	RAB8A	RAB8A, member RAS oncogene family	3.13175	1.61658e-05
A0A0F8B6A5	MARF1	meiosis regulator and mRNA stability factor 1	3.12875	2.09101e-12
H2U841	LMNA	lamin A/C	3.12303	2.30588e-12
T1ECS4	CASC1	Cancer susceptibility candidate gene 1 protein	3.10058	0.000144255
A0A1A7ZSF4	ESF1	ESF1 nucleolar pre-rRNA processing protein homolog	3.0879	0.000152607
A0A060WGC8	SUB1	SUB1 homolog, transcriptional regulator	3.08671	4.40671e-12
Q3B7F0	UBE2V1	ubiquitin conjugating enzyme E2 V1	3.07365	5.53443e-12
H2LW51	MX1	MX dynamin like GTPase 1	3.04493	8.9639e-12
A0A060WR30	DBNL	drebrin like	3.02957	1.16241e-11
A0A060WNL8	CAPNS1	calpain small subunit 1	3.00188	1.86624e-11
A0A060YAP2	PSMC2	proteasome 26S subunit, ATPase 2	2.97605	2.90359e-11
A0A060YC09	UBE2L3	ubiquitin conjugating enzyme E2 L3	2.96887	3.26897e-11
A0A146UDK5	YOD1	YOD1 deubiquitinase	2.94956	0.000324943
I3KNE1	SERPINB6	serpin family B member 6	2.91994	0.000383935
G3NE87	RPL7	ribosomal protein L7	2.91458	8.12187e-11
A0A060XAX4	HNRNPDL	heterogeneous nuclear ribonucleoprotein D like	2.83793	2.86999e-10
H3CMJ9	IL16	interleukin 16	2.83062	3.22052e-10
I3JL86	DHX15	DEAH-box helicase 15	2.82941	3.2689e-10
A0A146R6V1	EPB41	erythrocyte membrane protein band 4.1	2.82778	3.34167e-10
W5MAA0	TIMM44	translocase of inner mitochondrial membrane 44	2.75406	1.08513e-09
A0A060WXQ7	LZIC	leucine zipper and CTNNBIP1 domain containing	2.74857	0.000185591
A0A1A7WUG7	FARSB	phenylalanyl-tRNA synthetase subunit beta	2.72021	1.83035e-09
G3PE18	ARL8B	ADP ribosylation factor like GTPase 8B	2.71849	1.86346e-09
C1BG52	RPL9	ribosomal protein L9	2.71706	1.88822e-09
A0A060XHH9	KPNA4	karyopherin subunit alpha 4	2.71481	1.94729e-09
A0A060WC50	SART3	squamous cell carcinoma antigen recognized by T cells 3	2.68745	2.97527e-09
Q5M9N3	SRSF6	serine and arginine rich splicing factor 6	2.6835	3.12125e-09
G3PZS2	RPL12	ribosomal protein L12	2.6433	5.72928e-09
A0A060VTC7	ANXA11	annexin A11	2.63505	6.44347e-09
A0A060YSZ5	KHSRP	KH-type splicing regulatory protein	2.59928	1.10396e-08
G3QCA0	RARS	arginyl-tRNA synthetase	2.34225	4.25299e-07
A0A0P0ZFN6	STAT6	signal transducer and activator of transcription 6	2.33984	4.37575e-07
A0A060X1X2	PPP1R7	protein phosphatase 1 regulatory subunit 7	2.33072	4.93155e-07
C0HB82	HNRNPK	heterogeneous nuclear ribonucleoprotein K	2.31413	6.09261e-07
A0A0F8AID4	PSMD13	proteasome 26S subunit, non-ATPase 13	2.26395	1.17802e-06
A0A060WY94	RBMX	RNA binding motif protein X-linked	2.23554	1.70115e-06
A0A146ZYG2	RAB11B	RAB11B, member RAS oncogene family	2.17566	3.60837e-06
Q12905	ILF2	interleukin enhancer binding factor 2	2.15995	4.38189e-06
Q6PC13	PHB2	prohibitin 2	2.08193	1.13475e-05
A0A1A7ZG69	ANXA5	annexin A5	2.06172	1.44262e-05
A0A0F8BTK4	IFI35	interferon induced protein 35	1.9841	3.53414e-05
A0A1A7Z2U2	PHLPP2	PH domain and leucine rich repeat protein phosphatase 2	1.93446	6.1637e-05
A0A146UE13	RAB11A	RAB11A, member RAS oncogene family	1.92702	6.67744e-05
A0A1A7Z2Q7	RAB5C	RAB5C, member RAS oncogene family	1.80806	0.000235812
A0A0P7VSZ2	RAB5B	RAB5B, member RAS oncogene family	1.80806	0.000237552
F1QDQ1	COPA	coatomer protein complex subunit alpha	1.77633	0.000324252
A0A060XJI1	NPLOC4	NPL4 homolog, ubiquitin recognition factor	1.67813	0.00086775
A0A0R4IP85	RPS18	ribosomal protein S18	-1.5002	0.000820285
A0A060WUS9	RPL22	ribosomal protein L22	-1.64441	0.000192012
I3IZQ7	JAG2	jagged 2	-1.65803	0.000166498
A0A1A8HLB9	HIF3A	hypoxia inducible factor 3 subunit alpha	-1.76438	5.30477e-05
A0A060YLK0	SRSF4	serine and arginine rich splicing factor 4	-2.01047	2.85308e-06
W5ULM3	RPL4	ribosomal protein L4	-2.17085	3.59678e-07
H2MRB3	XIRP2	xin actin binding repeat containing 2	-2.24828	1.23672e-07
A0A060WPM7	CCDC6	coiled-coil domain containing 6	-2.63961	0.000144906
A0A060WH37	CAPZB	capping actin protein of muscle Z-line subunit beta	-2.67973	1.88373e-10
A0A060XW75	SEPHS1	selenophosphate synthetase 1	-2.81782	4.78923e-05
A0A0P7TS35	HIST1H4K	histone cluster 1 H4 family member k	-2.84976	3.90262e-05
A0A146PRN4	VCP	valosin containing protein	-2.86291	8.8423e-12
O95407	TNFRSF6B	TNF receptor superfamily member 6b	-3.08488	6.23719e-05
A0A060XJ31	AGO2	argonaute 2, RISC catalytic component	-3.09983	7.18034e-06
W5MVT0	SORCS2	sortilin related VPS10 domain containing receptor 2	-3.10123	5.74477e-05
A0A060W664	FAHD2A	fumarylacetoacetate hydrolase domain containing 2A	-3.14879	5.08138e-06
W5JZS4	ACTN4	actinin alpha 4	-3.1831	3.97566e-06
W5MW39	SEPT10	septin 10	-3.28822	1.8852e-06
A0A060WGZ9	PSMA3	proteasome subunit alpha 3	-3.30934	1.61095e-06
H2LLK1	OBSCN	obscurin, cytoskeletal calmodulin and titin-interacting RhoGEF	-3.32209	1.4707e-06
A0A060XFP6	ATP6V1B2	ATPase H+ transporting V1 subunit B2	-3.34495	1.24058e-06
A0A087X9K4	TALDO1	transaldolase 1	-3.36295	1.08497e-06
A0A060W737	ADSL	adenylosuccinate lyase	-3.41326	7.39968e-07
C1BEJ8	PSME2	proteasome activator subunit 2	-3.44268	5.94739e-07
A0A060VR56	UMPS	uridine monophosphate synthetase	-3.4934	4.01723e-07
A0A0E9X1H6	BANF1	barrier to autointegration factor 1	-3.5549	2.47026e-07
A0A0P7U5P5	LHPP	phospholysine phosphohistidine inorganic pyrophosphate phosphatase	-3.55741	2.42968e-07
A0A060XTT4	MTPN	myotrophin	-3.62302	1.44083e-07
B5X7W0	PSMB4	proteasome subunit beta 4	-3.68572	8.6442e-08
E7FBE5	CLTC	clathrin heavy chain	-3.69054	6.62802e-19
A0A060XVY0	RAD23B	RAD23 homolog B, nucleotide excision repair protein	-3.77103	4.23722e-08
B5X5B6	CUTA	cutA divalent cation tolerance homolog	-3.80308	3.25307e-08
A0A1A8BRI3	MTAP	methylthioadenosine phosphorylase	-3.90459	1.36263e-08
A0A060YRL7	SAP18	Sin3A associated protein 18	-3.90718	4.52043e-21
A0A146WNX6	HPD	4-hydroxyphenylpyruvate dioxygenase	-3.93245	1.0699e-08
A0A060VVU4	SRSF1	serine and arginine rich splicing factor 1	-3.94002	1.00243e-08
A0A060Y406	PLPBP	pyridoxal phosphate binding protein	-3.97928	7.13593e-09
A0A1A7XUB2	SELENBP1	selenium binding protein 1	-4.18865	1.0872e-09
A0A060WXR4	ACO1	aconitase 1	-4.20929	9.00833e-10
A0A067YRG8	MT-ND2	mitochondrially encoded NADH:ubiquinone oxidoreductase core subunit 2	-4.22618	7.71103e-10
A0A060W0N5	RDX	radixin	-4.2434	6.57627e-10
B5X805	LGALS1	galectin 1	-4.29859	3.95386e-10
B5X304	NPEPL1	aminopeptidase like 1	-4.303	3.79756e-10
A5Y4E7	HIST2H3D	histone cluster 2 H3 family member d	-4.35331	6.62805e-26
A0A0P7UP22	YWHAQ	tyrosine 3-monooxygenase/tryptophan 5-monooxygenase activation protein theta	-4.38418	1.76343e-10
A0A060W9V0	GSTA3	glutathione S-transferase alpha 3	-4.38498	1.76115e-10
Q2M3V2	SOWAHA	sosondowah ankyrin repeat domain family member A	-4.39662	2.12634e-26
A0A087Y895	VASH1	vasohibin 1	-4.40954	1.38642e-10
C1BHJ7	PSMB1	proteasome subunit beta 1	-4.45078	9.32027e-11
A0A060XAB1	CS	citrate synthase	-4.4735	7.48227e-11
A0A060WEK6	ADSS	adenylosuccinate synthase	-4.51471	4.99323e-11
E7FAN4	MYZAP	myocardial zonula adherens protein	-4.54965	3.53084e-11
A0A060YAB1	CNDP2	carnosine dipeptidase 2	-4.56789	2.96681e-11
A0A0R4IAL5	TPM3	tropomyosin 3	-4.58894	2.41522e-11
A0A060WLL6	HNRNPA1	heterogeneous nuclear ribonucleoprotein A1	-4.67666	1.00428e-11
A0A060W368	RAB7A	RAB7A, member RAS oncogene family	-4.68834	8.95529e-12
A0A060XN46	ANP32B	acidic nuclear phosphoprotein 32 family member B	-4.70251	7.79659e-12
A0A060VUF3	PSMA4	proteasome subunit alpha 4	-4.77631	3.65005e-12
B5X374	XPNPEP1	X-prolyl aminopeptidase 1	-4.81374	2.46079e-12
A0A060VYN9	FADD	Fas associated via death domain	-4.84235	1.81896e-12
A0A060XEE5	ANP32E	acidic nuclear phosphoprotein 32 family member E	-4.87611	1.27267e-12
W5N5W8	OTUB2	OTU deubiquitinase, ubiquitin aldehyde binding 2	-4.88153	1.20296e-12
G3PBE1	PLEKHH1	pleckstrin homology, MyTH4 and FERM domain containing H1	-4.88153	1.206e-12
A0A1C7D1U2	LEPR	leptin receptor	-4.92308	7.78771e-13
A0A147A1D8	TPM4	tropomyosin 4	-4.97184	4.64086e-13
B2GRK9	TKT	transketolase	-4.97312	1.861e-33
A0A0E9WIX1	CBR1	carbonyl reductase 1	-4.9833	4.14289e-13
A0A087Y2T8	LSM1	LSM1 homolog, mRNA degradation associated	-5.11713	9.68282e-14
W5KWQ8	DNAJB12	DnaJ heat shock protein family (Hsp40) member B12	-5.11762	9.65577e-14
A0A0F8CUX4	RPIA	ribose 5-phosphate isomerase A	-5.11762	9.68267e-14
A0A060YVP3	SOD1	superoxide dismutase 1	-5.13293	8.25057e-14
Q90WD9	GAPDHS	glyceraldehyde-3-phosphate dehydrogenase, spermatogenic	-5.13413	8.16182e-14
A0A147ACY4	LSM4	LSM4 homolog, U6 small nuclear RNA and mRNA degradation associated	-5.14756	7.02377e-14
A0A060ZHX0	UBC	ubiquitin C	-5.19457	4.19308e-14
A0A060WHZ7	FTH1	ferritin heavy chain 1	-5.24525	2.39617e-14
C1BH71	PSMB2	proteasome subunit beta 2	-5.29217	1.39842e-14
A0A060XW06	PSMA1	proteasome subunit alpha 1	-5.3331	8.66793e-15
A0A060XMD7	NME2	NME/NM23 nucleoside diphosphate kinase 2	-5.38922	4.56419e-15
B5X3F7	TYMP	thymidine phosphorylase	-5.39076	4.49504e-15
A0A060W297	PSMA2	proteasome subunit alpha 2	-5.42787	2.90117e-15
A0A060WII1	SNRPD3	small nuclear ribonucleoprotein D3 polypeptide	-5.46828	1.81709e-15
B5DGU6	PSMA8	proteasome subunit alpha 8	-5.4977	1.276e-15
H2M1P9	FAM208A	family with sequence similarity 208 member A	-5.53451	3.96102e-41
P17066	HSPA6	heat shock protein family A (Hsp70) member 6	-5.54335	7.4297e-16
A0A060Z585	F13A1	coagulation factor XIII A chain	-5.55583	6.41638e-16
C1BKB5	PGAM1	phosphoglycerate mutase 1	-5.56644	5.6694e-16
A0A1D8EJB2	GAPDH	glyceraldehyde-3-phosphate dehydrogenase	-5.6457	2.18199e-16
H3C4J4	MCCC1	methylcrotonoyl-CoA carboxylase 1	-5.65383	1.97822e-16
W5U9F4	CYP3A4	cytochrome P450 family 3 subfamily A member 4	-5.85357	1.6271e-17
W5NK12	TGFBRAP1	transforming growth factor beta receptor associated protein 1	-5.85602	1.58198e-17
A0A1A7ZW77	NUP210	nucleoporin 210	-5.89555	1.72967e-46
B5RI36	ATP5F1B	ATP synthase F1 subunit beta	-5.91062	7.84731e-18
E7EQB2	TF	transferrin	-6.00432	2.3347e-18
A0A060WZS1	YWHAE	tyrosine 3-monooxygenase/tryptophan 5-monooxygenase activation protein epsilon	-6.06693	1.03056e-18
M4SPF4	GPX1	glutathione peroxidase 1	-6.08119	8.57835e-19
A0A0E9WD84	PSMA5	proteasome subunit alpha 5	-6.14863	3.51209e-19
B8JLC8	RAB1B	RAB1B, member RAS oncogene family	-6.19288	1.93277e-19
A0A0F8CP44	KDM2A	lysine demethylase 2A	-6.20205	1.71853e-19
F1Q9R5	STEAP4	STEAP4 metalloreductase	-6.22593	1.24455e-19
A8CEI1	HSPA5	heat shock protein family A (Hsp70) member 5	-6.22678	1.23489e-19
A0A076U5C2	HPRT1	hypoxanthine phosphoribosyltransferase 1	-6.28241	5.78768e-20
A0A060WSQ0	BCORL1	BCL6 corepressor like 1	-6.29402	4.94818e-20
D6RBJ7	GC	GC, vitamin D binding protein	-6.32804	3.0975e-20
A0A0R4IDW4	DRAXIN	dorsal inhibitory axon guidance protein	-6.42141	8.50177e-21
W5UL26	PSMA6	proteasome subunit alpha 6	-6.4862	3.43211e-21
A0A087Y0P1	PRIM2	DNA primase subunit 2	-6.50781	6.29028e-20
A5HL62	HSPA1L	heat shock protein family A (Hsp70) member 1 like	-6.71332	1.32353e-22
C1BFA2	BLVRB	biliverdin reductase B	-6.81205	3.08309e-23
W5ZMG9	ACTA2	actin, alpha 2, smooth muscle, aorta	-6.88075	1.10334e-23
W5LUJ3	HSPA8	heat shock protein family A (Hsp70) member 8	-6.93889	4.66919e-24
W5LLP4	PCNX3	pecanex 3	-6.99238	2.0805e-24
C3KHH7	NME5	NME/NM23 family member 5	-6.99238	2.08954e-24
A0A076U3I1	FABP3	fatty acid binding protein 3	-7.01871	1.41306e-24
A0A146NQN8	MSN	moesin	-7.05933	7.61643e-25
A0A087YE46	ALDH9A1	aldehyde dehydrogenase 9 family member A1	-7.11786	3.12343e-25
A0A0P7UMM5	ACTB	actin beta	-7.15524	1.76476e-25
A0A146VTJ2	CD209	CD209 molecule	-7.20542	8.05216e-26
A0A0P7UUX5	RAN	RAN, member RAS oncogene family	-7.23144	5.36045e-26
A0A0N8K0M2	CALM1	calmodulin 1	-7.25497	3.72507e-26
G3Q6L5	PCOLCE	procollagen C-endopeptidase enhancer	-7.26964	2.96325e-26
A0A1A8E8A8	AASDHPPT	aminoadipate-semialdehyde dehydrogenase-phosphopantetheinyl transferase	-7.2976	1.90615e-26
P51888	PRELP	proline and arginine rich end leucine rich repeat protein	-7.31891	1.36817e-26
A0A146Q977	TTC38	tetratricopeptide repeat domain 38	-7.34931	2.02479e-71
A0A0C4DFP1	DACT3	dishevelled binding antagonist of beta catenin 3	-7.57212	2.26184e-28
M3ZTJ1	MYBPC1	myosin binding protein C, slow type	-7.58752	1.76083e-28
A0A0F8AR08	SLC4A8	solute carrier family 4 member 8	-7.63223	8.40551e-29
M4A0C3	CPNE9	copine family member 9	-7.65162	6.10894e-29
A0A060WAC9	CXXC5	CXXC finger protein 5	-7.66768	4.69075e-29
A0A060WNM4	ANKRD33	ankyrin repeat domain 33	-7.70311	2.68698e-78
A0A146R2Q7	RTL1	retrotransposon Gag like 1	-7.87405	1.43617e-30
A0A0F8CQE0	ACTN3	actinin alpha 3 (gene/pseudogene)	-7.92318	9.8284e-83
G3PPW2	SRSF2	serine and arginine rich splicing factor 2	-8.03284	9.27973e-32
G3PBA3	YWHAG	tyrosine 3-monooxygenase/tryptophan 5-monooxygenase activation protein gamma	-8.21728	3.57054e-33
A0A146QEX3	EMC1	ER membrane protein complex subunit 1	-8.24279	2.29359e-33
A0A0G2KIM8	BNC1	basonuclin 1	-8.24279	2.30592e-33
A0A087X9Y5	PTPRD	protein tyrosine phosphatase, receptor type D	-8.24279	2.31839e-33
A0A0F8CJP0	TRAF3IP1	TRAF3 interacting protein 1	-8.43078	7.70043e-35
W5MIJ7	GFOD2	glucose-fructose oxidoreductase domain containing 2	-8.43581	1.50208e-93
C1BFF6	TXN	thioredoxin	-8.53589	1.11223e-35
Q4SNH8	ATP1A3	ATPase Na+/K+ transporting subunit alpha 3	-8.88647	1.43993e-38
W5KHJ5	DIDO1	death inducer-obliterator 1	-9.27492	6.79658e-42
A0A146UID7	YWHAZ	tyrosine 3-monooxygenase/tryptophan 5-monooxygenase activation protein zeta	-9.29595	4.46787e-42
A0A087X3T8	DBR1	debranching RNA lariats 1	-9.29595	4.494e-42
A0A087YPS5	RAP2B	RAP2B, member of RAS oncogene family	-9.33602	2.00487e-42
H2LB55	CHADL	chondroadherin like	-9.57478	1.48639e-44
H2V5E8	DNAJA3	DnaJ heat shock protein family (Hsp40) member A3	-9.58652	2.91221e-120
A0A1A8LHU3	GSS	glutathione synthetase	-9.58652	2.93272e-120
A0A0R4IPV1	ALAD	aminolevulinate dehydratase	-9.99033	2.16308e-48
H2SKX7	EPS8L1	EPS8 like 1	-10.0114	1.37496e-48
A0A0P7WRV6	PATL1	PAT1 homolog 1, processing body mRNA decay factor	-10.0114	1.38334e-48
H3CEI7	MYH8	myosin heavy chain 8	-10.1811	3.35045e-50
E7F921	WFS1	wolframin ER transmembrane glycoprotein	-10.3326	1.15535e-51
A0A0F8AIX7	LURAP1	leucine rich adaptor protein 1	-10.3326	1.16257e-51
I3KPD8	SPHK1	sphingosine kinase 1	-10.4388	1.0649e-52
W5KWA8	BOP1	block of proliferation 1	-11.3733	2.60444e-62
E0X5L0	HLA-A	major histocompatibility complex, class I, A	-11.3799	2.22738e-62
A0A0P7Z7F4	UBR2	ubiquitin protein ligase E3 component n-recognin 2	-11.4759	2.07165e-63
Q12830	BPTF	bromodomain PHD finger transcription factor	-11.4842	1.69737e-63
H2TF26	PLCB4	phospholipase C beta 4	-11.4842	1.70846e-63
W5MVI4	CDH17	cadherin 17	-11.6475	2.84942e-65
A0A087X9X5	AGRN	agrin	-11.6475	2.86829e-65
M3ZTC0	PKHD1L1	PKHD1 like 1	-11.8906	5.83161e-68
H2LF23	ABCC4	ATP binding cassette subfamily C member 4	-12.255	4.19989e-72
A0A1A7WG28	COL17A1	collagen type XVII alpha 1 chain	-13.4319	2.47928e-86
I3IU12	TRIM62	tripartite motif containing 62	-13.7874	6.97407e-91
A0A1A7XL68	CDK5RAP1	CDK5 regulatory subunit associated protein 1	-14.7056	3.48699e-103

## Sheet: Peptide List_Membrane samples
Main Accession	Protein Group	V1-Mbr/C1-Mbr	V2-Mbr/C2-Mbr	Sequence	Modifications	Score	m/z	Mr (Da)	Charge	Delta (ppm)	RT
A0A060XII9	134	1.36399	1.01947	134
	A0A060XII9	0.00229336	0.0250345	LSDDNTIGQEEIEQR		144.19	873.913	1745.81	2	0.545827	48.0562
	A0A060XII9;A0A0D9SGF6;A0A0R4IJ08;A0A0S7GFR3;A0A0S7GFS1;A0A0S7GFS2;A0A0S7GFS3;A0A0S7GG64;A0A0S7GGW2;A0A0S7GGW7;A0A0S7GKU3;A0A0S7GLM7;A0A0S7GNH5;A0A1A7WGD9;A0A1A7Z4A6;A0A1A8GCR2;A0A1A8MAY9;A0A1A8MXE6;A0A1A8QNY9;A0A1A8RNY5;A0A1A8SFC1;A0A060XJX9;A0A087XQU7;A0A146NIL5;A0A146NIU7;A0A146NJR6;A0A146Q523;A0A146Z4H1;A0A146Z4J7;A0A146Z4K2;A0A146Z4L3;A0A146Z4P1;A0A146Z5L2;A0A146Z6F5;A0A146Z650;F1QDX2;F1R443;…	1.10634	0.946459	NQALNTDNYGHDLASVQALQR		127.8	776.717	2327.13	3	-0.924291	82.1301
	A0A060XII9;A0A060XJX9;W5KTF3;W5KTG2	1.36575	1.12044	DLAALEDKVNTLGGEAER		127.25	950.985	1899.96	2	3.09066	100.048
	A0A060XII9;A0A0D9SGF6;A0A060XJX9;C0PUV6;Q13813;W5MFM2;W5MFP4	1.44255	1.06817	SSLSSAQADFNQLAELDR		124.15	976.474	1950.93	2	1.7385	116.843
	A0A060XII9;A0A0P7VEP4;A0A0S7GFQ8;A0A0S7GFR3;A0A0S7GFS1;A0A0S7GFS2;A0A0S7GFS3;A0A0S7GFT9;A0A0S7GG64;A0A0S7GGW2;A0A0S7GGW7;A0A0S7GKU3;A0A0S7GLM7;A0A0S7GNH5;A0A1A7WGD9;A0A1A7Z4A6;A0A1A8AIC9;A0A1A8DRB6;A0A1A8GCR2;A0A1A8KF62;A0A1A8MAY9;A0A1A8MXE6;A0A1A8QNY9;A0A1A8RNY5;A0A1A8SFC1;A0A1A8UI02;A0A060XJX9;A0A087XQU7;I3JZ89;I3JZ90;M4A8R0;W5KTF3;W5KTG2	0.0290227	34.4391	AGTFQAFEQFGQQLLAR		122.22	956.489	1910.96	2	1.61374	169.873
	A0A060XII9;A0A0R4IJ08;A0A0S7GFS1;A0A0S7GFS2;A0A0S7GFS3;A0A0S7GG64;A0A0S7GGW2;A0A0S7GGW7;A0A0S7GI92;A0A0S7GKU3;A0A0S7GLM7;A0A0S7GLW5;A0A1A7WGD9;A0A1A7Z4A6;A0A1A8AIC9;A0A1A8DRB6;A0A1A8GCR2;A0A1A8KF62;A0A1A8MAY9;A0A1A8MXE6;A0A1A8QNY9;A0A1A8RNY5;A0A1A8SFC1;A0A1A8UI02;A0A060XJX9;A0A087XQU7;A0A146NIL5;A0A146NIU7;A0A146NJR6;A0A146Q523;A0A146Z4J7;A0A146Z4K2;A0A146Z4L3;A0A146Z4P1;A0A146Z6F5;A0A146Z650;F1R…	1.12788	1556.08	LNLVGSEDYGDTLAAVQGLLK		115.77	726.054	2175.14	3	0.603017	171.724
	A0A060XII9	0.00670639	4.96313	SLVSSEELAKDVTGAEALLER		110.49	739.726	2216.16	3	2.9823	161.762
	A0A060XII9;A0A060XJX9;G3Q393;G3Q398;H2UIA9;H2UIB0;H2UIB1;I3JZ89;I3JZ90	1.50932	0.826446	LGALDEQWQFLVNK		110.33	830.941	1659.87	2	3.97313	140.23
	A0A060XII9;A0A0R4IJ08;A0A0S7GFS1;A0A0S7GFS2;A0A0S7GFS3;A0A0S7GG64;A0A0S7GGW2;A0A0S7GGW7;A0A0S7GI92;A0A0S7GKU3;A0A0S7GLM7;A0A0S7GLW5;A0A1A7WGD9;A0A1A7Z4A6;A0A1A8AIC9;A0A1A8DRB6;A0A1A8GCR2;A0A1A8KF62;A0A1A8MAY9;A0A1A8MXE6;A0A1A8QNY9;A0A1A8RNY5;A0A1A8SFC1;A0A1A8UI02;A0A060XJX9;A0A087XQU7;A0A146NIL5;A0A146NIU7;A0A146NJR6;A0A146Q523;A0A146Z4J7;A0A146Z4K2;A0A146Z4L3;A0A146Z4P1;A0A146Z6F5;A0A146Z650;F1R…	16.1158	1.01947	LNLVGSEDYGDTLAAVQGLLK		109.97	1088.58	2175.15	2	6.71343	175.929
	A0A060XII9;A0A0D9SGF6;A0A0P7V2T7;A0A0P7VEP4;A0A0R4IJ08;A0A0S7GFS1;A0A0S7GFS2;A0A0S7GFS3;A0A0S7GG64;A0A0S7GGW2;A0A0S7GGW7;A0A0S7GI92;A0A0S7GKU3;A0A0S7GLM7;A0A0S7GLW5;A0A1A7WGD9;A0A1A7Z4A6;A0A1A8AIC9;A0A1A8DRB6;A0A1A8GCR2;A0A1A8KF62;A0A1A8MAY9;A0A1A8MXE6;A0A1A8QNY9;A0A1A8RNY5;A0A1A8SFC1;A0A1A8UI02;A0A1B0GV13;A0A060XJX9;A0A087XQU7;A0A146NIL5;A0A146NIU7;A0A146NJR6;A0A146Q523;A0A146Z4J7;A0A146Z4K2;A0A…	1.62303	0.582025	LDENSAFLQFNWK		109.63	806.398	1610.78	2	7.24726	133.8
	A0A060XII9;A0A0R4IJ08;A0A060XJX9;F1QDX2;F1R443;F1R446;H2UIB1;H3CBT9;I3JZ89;I3JZ90;Q4T9R4;Q4T9R5	1.59564	1.6447	LAVQTTANFNTIK		107.46	710.894	1419.77	2	3.10611	73.2969
	A0A060XII9;A0A0P7V2T7;A0A0P7VEP4;A0A0R4IJ08;A0A0S7GKE8;A0A0S7GMT1;A0A0S7GQA6;A0A1A7WGD9;A0A1A7Z4A6;A0A1A8D2Q6;A0A1A8D8C3;A0A1A8GCR2;A0A1A8I584;A0A1A8KR84;A0A1A8MAY9;A0A1A8QC83;A0A1A8SFC1;A0A1A8UI02;A0A060XJX9;A0A087XQU7;A0A146Q523;A0A146Z4H1;A0A146Z4K2;A0A146Z4L3;A0A146Z4P1;A0A146Z5L2;A0A146Z6F5;A0A146Z650;F1R443;F1R446;G3Q393;G3Q398;H2MBY2;I3JZ89;I3JZ90;M4A8R0;Q566W8;W5KTF3;W5KTG2;W5MFM2;W5MFP4	3.19093	1.85266	ALINADELANDVAGAEALLDR		107	718.709	2153.11	3	2.54416	185.541
	A0A060XII9;A0A0D9SGF6;A0A0P7V2T7;A0A0P7VEP4;A0A0R4IJ08;A0A0S7GFS2;A0A0S7GFS3;A0A0S7GGW7;A0A0S7GI92;A0A0S7GKU3;A0A1A7WGD9;A0A1A7Z4A6;A0A1A8AIC9;A0A1A8DRB6;A0A1A8GCR2;A0A1A8KF62;A0A1A8MAY9;A0A1A8MXE6;A0A1A8QNY9;A0A1A8RNY5;A0A1A8SFC1;A0A1A8UI02;A0A060XJX9;A0A087XQU7;A0A146NIU7;A0A146Q523;A0A146Z4J7;A0A146Z4L3;A0A146Z4P1;A0A146Z6F5;A0A146Z650;C0PUV6;F1R443;F1R445;F1R446;F8K8N3;G3Q393;G3Q398;H2MBY2;H2…	2.21306	2.37499	IEDLGAAMEEALILDNK		106.2	922.972	1843.93	2	5.60561	153.845
	A0A060XII9;A0A1A7WGD9;A0A1A7Z4A6;A0A1A8D2Q6;A0A1A8GCR2;A0A1A8I584;A0A1A8KR84;A0A1A8MXE6;A0A1A8QNY9;A0A1A8SFC1;A0A060XJX9;W5KTF3;W5KTG2	1042.5	684.201	EGALTNEEVGSDLEQVEVLQK		105.35	1144.07	2286.13	2	4.00149	109.237
	A0A060XII9	1.55537	1.03201	GACAGSEDAVQSR	[3] Methylthio (C)	104.86	648.769	1295.52	2	3.122	23.9841
	A0A060XII9;A0A060XJX9	0.0817648	0.709318	VLESADDIQER		103.48	637.815	1273.61	2	3.74829	30.9067
	A0A060XII9;A0A060XJX9;C0PUV6	235.68	1.01947	NTTGVTEDALKEFSMMFK		99.73	683.664	2047.97	3	4.49332	170.729
	A0A060XII9;A0A0D9SGF6;A0A0P7V2T7;A0A0P7VEP4;A0A0R4IJ08;A0A0S7GFS2;A0A0S7GFS3;A0A0S7GGW7;A0A0S7GI92;A0A0S7GKU3;A0A1A7WGD9;A0A1A7Z4A6;A0A1A8AIC9;A0A1A8DRB6;A0A1A8GCR2;A0A1A8KF62;A0A1A8MAY9;A0A1A8MXE6;A0A1A8QNY9;A0A1A8RNY5;A0A1A8SFC1;A0A1A8UI02;A0A060XJX9;A0A087XQU7;A0A146NIU7;A0A146Q523;A0A146Z4J7;A0A146Z4L3;A0A146Z4P1;A0A146Z6F5;A0A146Z650;C0PUV6;F1R443;F1R445;F1R446;F8K8N3;G3Q393;G3Q398;H2MBY2;H2…	12.4474	0.768997	KIEDLGAAMEEALILDNK		99.23	658.351	1972.03	3	5.84731	152.693
	A0A060XII9;A0A0D9SGF6;A0A0P7V2T7;A0A0P7VEP4;A0A0R4IJ08;A0A0S7GFR3;A0A0S7GFS2;A0A0S7GG64;A0A0S7GKU3;A0A0S7GLM7;A0A1A7WGD9;A0A1A7Z4A6;A0A1A8D2Q6;A0A1A8GCR2;A0A1A8I584;A0A1A8KR84;A0A1A8MXE6;A0A1A8QNY9;A0A1A8SFC1;A0A060XJX9;A0A146NIL5;A0A146NIU7;A0A146NJR6;A0A146Q523;A0A146Z4H1;A0A146Z4J7;A0A146Z4K2;A0A146Z4L3;A0A146Z4P1;A0A146Z5L2;A0A146Z6F5;A0A146Z650;F1R443;F1R446;G3Q393;G3Q398;H2UIB0;H2UIB1;H3CBT…	1.03818	2427.31	QQVAPTDDETGKELVLALYDYQEK		96.33	918.458	2752.35	3	4.07101	131.026
	A0A060XII9;A0A0D9SGF6;A0A0P7V2T7;A0A0R4IJ08;A0A0S7GFR3;A0A0S7GFS2;A0A0S7GG64;A0A0S7GKU3;A0A0S7GLM7;A0A1A7WGD9;A0A1A7Z4A6;A0A1A8D2Q6;A0A1A8D8C3;A0A1A8GCR2;A0A1A8I584;A0A1A8KR84;A0A1A8MAY9;A0A1A8RNY5;A0A1A8SFC1;A0A060XJX9;A0A087XQU7;F1R443;F1R446;G3Q393;G3Q398;H2MBY2;I3JZ89;I3JZ90;M4A8R0;Q13813;W5KTF3;W5KTG2;W5MFM2;W5MFP4	1.03818	1.24516	RQDLEDSLQAQQYFADANEAESWMR		95.41	1001.12	3000.34	3	4.19052	134.37
	A0A060XII9;A0A0D9SGF6;A0A060XJX9;C0PUV6;Q13813;W5MFM2;W5MFP4	1.38434	1.09069	SSLSSAQADFNQLAELDR		93.6	651.318	1950.93	3	1.4648	116.843
	A0A060XII9;A0A0R4IJ08;A0A0S7GFQ2;A0A0S7GFQ8;A0A0S7GFR3;A0A0S7GFS1;A0A0S7GFS2;A0A0S7GFS3;A0A0S7GG64;A0A0S7GGW2;A0A0S7GGW7;A0A0S7GI92;A0A0S7GKU3;A0A0S7GLM7;A0A0S7GLW5;A0A0S7GNH5;A0A1A7WGD9;A0A1A7Z4A6;A0A1A8AIC9;A0A1A8DRB6;A0A1A8GCR2;A0A1A8KF62;A0A1A8MAY9;A0A1A8MXE6;A0A1A8QNY9;A0A1A8RNY5;A0A1A8SFC1;A0A1A8UI02;A0A087XQU7;A0A146NIL5;A0A146NIU7;A0A146NJR6;A0A146Q523;A0A146Z4H1;A0A146Z4J7;A0A146Z4K2;A0A…	1.47246	0.92686	GVIDTGNALIQR		93.15	628.853	1255.69	2	1.68535	71.0409
	A0A060XII9;A0A060XJX9	0.411037	0.494178	LGVLTEEKESLLELWEVR		92.83	715.063	2142.17	3	2.77338	189.504
	A0A060XII9;A0A0P7VEP4;A0A0S7GFQ8;A0A0S7GFR3;A0A0S7GFS1;A0A0S7GFS2;A0A0S7GFS3;A0A0S7GFT9;A0A0S7GG64;A0A0S7GGW2;A0A0S7GGW7;A0A0S7GKU3;A0A0S7GLM7;A0A0S7GNH5;A0A1A7WGD9;A0A1A7Z4A6;A0A1A8AIC9;A0A1A8DRB6;A0A1A8GCR2;A0A1A8KF62;A0A1A8MAY9;A0A1A8MXE6;A0A1A8QNY9;A0A1A8RNY5;A0A1A8SFC1;A0A1A8UI02;A0A060XJX9;A0A087XQU7;I3JZ89;I3JZ90;M4A8R0;W5KTF3;W5KTG2	71.7992	2.98086	AGTFQAFEQFGQQLLAR		92.56	637.998	1910.97	3	6.14205	169.011
	A0A060XII9;A0A0D9SGF6;A0A0P7V2T7;A0A0P7VEP4;A0A0R4IJ08;A0A1A7WGD9;A0A1A7Z4A6;A0A1A8D2Q6;A0A1A8D8C3;A0A1A8GCR2;A0A1A8I584;A0A1A8KR84;A0A1A8MAY9;A0A1A8QC83;A0A1A8SFC1;A0A1A8UI02;A0A060XJX9;A0A087XQU7;A0A146Q523;A0A146Z4H1;A0A146Z4J7;A0A146Z4K2;A0A146Z4L3;A0A146Z4P1;A0A146Z5L2;A0A146Z6F5;A0A146Z650;F1R443;F1R446;G3Q393;G3Q398;H2MBY2;H2UIA9;H2UIB0;H2UIB1;H3C0G3;H3CBT9;I3JZ89;I3JZ90;M4A8R0;Q4T9R4;Q4T9…	1.02938	1.07542	HQAFEAELSANQSR		92.43	529.923	1586.75	3	4.18109	40.423
	A0A060XII9;A0A0D9SFH4;A0A0D9SGF6;A0A0P7V2T7;A0A0P7VEP4;A0A0R4IJ08;A0A0S7GFS2;A0A0S7GFS3;A0A0S7GGW7;A0A0S7GI92;A0A0S7GKU3;A0A1A7WGD9;A0A1A7Z4A6;A0A1A8AIC9;A0A1A8DRB6;A0A1A8GCR2;A0A1A8KF62;A0A1A8MAY9;A0A1A8MXE6;A0A1A8QNY9;A0A1A8RNY5;A0A1A8SFC1;A0A1A8UI02;A0A060XJX9;A0A087XQU7;A0A146NIU7;A0A146Q523;A0A146Z4J7;A0A146Z4L3;A0A146Z4P1;A0A146Z650;C0PUV6;F1R443;F1R445;F1R446;F8K8N3;G3Q393;G3Q398;H2MBY2;H2…	1.80805	0.865306	SSEEIESAFR		88.75	577.771	1153.53	2	-1.61916	51.3788
	A0A060XII9;A0A0P7VEP4;A0A0R4IJ08;A0A0S7GFS1;A0A0S7GFS2;A0A0S7GFS3;A0A0S7GG64;A0A0S7GGW2;A0A0S7GGW7;A0A0S7GI92;A0A0S7GKU3;A0A0S7GLM7;A0A0S7GLW5;A0A1A7WGD9;A0A1A7Z4A6;A0A1A8AIC9;A0A1A8DRB6;A0A1A8GCR2;A0A1A8KF62;A0A1A8MAY9;A0A1A8MXE6;A0A1A8QNY9;A0A1A8RNY5;A0A1A8SFC1;A0A1A8UI02;A0A060XJX9;A0A087XQU7;A0A146NIL5;A0A146NIU7;A0A146NJR6;A0A146Q523;A0A146Z4J7;A0A146Z4K2;A0A146Z4L3;A0A146Z4P1;A0A146Z6F5;A0A…	145.971	0.577478	QETFDAGLQAFQQEGITNITALK		88.67	841.766	2522.28	3	3.03161	153.268
	A0A060XII9;A0A0R4IJ08;A0A060XJX9;F1R443;F1R446;W5KTF3;W5KTG2	2.25083	1.26027	ENLLDEQGSIGLR		87.54	722.375	1442.74	2	-2.74321	85.0251
	A0A060XII9;A0A0D9SGF6;A0A0P7VEP4;A0A0R4IJ08;A0A0S7GFS2;A0A0S7GFS3;A0A0S7GGW7;A0A0S7GI92;A0A0S7GKU3;A0A1A7WGD9;A0A1A7Z4A6;A0A1A8AIC9;A0A1A8DRB6;A0A1A8GCR2;A0A1A8KF62;A0A1A8MAY9;A0A1A8MXE6;A0A1A8QNY9;A0A1A8RNY5;A0A1A8SFC1;A0A1A8UI02;A0A060XJX9;A0A087XQU7;A0A146NIU7;A0A146Q523;A0A146Z4J7;A0A146Z4L3;A0A146Z4P1;A0A146Z6F5;A0A146Z650;C0PUV6;F1R443;F1R445;F1R446;F8K8N3;G3Q393;G3Q398;H2MBY2;H2UGD2;H3C0G3…	0.233289	0.00119199	YTEHSTVGLAQQWDQLDQLGMR		87.43	859.415	2575.22	3	5.41344	132.586
	A0A060XII9;A0A0D9SGF6;A0A0P7VEP4;A0A0R4IJ08;A0A060XJX9;F1R443;F1R446;G3Q393;G3Q398;H2UIA9;H2UIB0;H2UIB1;H3C0G3;H3CBT9;I3JZ89;I3JZ90;Q4T9R4;Q4T9R5;Q566W8;Q13813;W5KTF3;W5KTG2;W5MFM2;W5MFP4	1.14844	0.843343	LFGAAEVQR		87	495.772	989.53	2	0.100762	47.4206
	A0A060XII9	1.03818	326.09	SLVSSEELAKDVTGAEALLER		86.23	1109.09	2216.16	2	4.32672	154.566
	A0A060XII9;A0A0D9SGF6;A0A0P7V2T7;A0A0R4IJ08;A0A1A7WGD9;A0A1A7Z4A6;A0A1A8D2Q6;A0A1A8GCR2;A0A1A8I584;A0A1A8KR84;A0A1A8MXE6;A0A1A8QNY9;A0A1A8SFC1;A0A060XJX9;F1R443;F1R446;G3Q393;G3Q398;Q13813;W5KTF3;W5KTG2	1.54542	1.00188	EANELQQWINEK		84.85	751.369	1500.72	2	1.77925	86.718
	A0A060XII9;A0A0D9SGF6;A0A0P7VEP4;A0A0R4IJ08;A0A0S7GFQ8;A0A0S7GFR3;A0A0S7GFS1;A0A0S7GFS2;A0A0S7GFS3;A0A0S7GFT9;A0A0S7GG64;A0A0S7GGW2;A0A0S7GGW7;A0A0S7GKU3;A0A0S7GLM7;A0A0S7GNH5;A0A1A7WGD9;A0A1A7Z4A6;A0A1A8AIC9;A0A1A8DRB6;A0A1A8GCR2;A0A1A8KF62;A0A1A8MAY9;A0A1A8MXE6;A0A1A8QNY9;A0A1A8RNY5;A0A1A8SFC1;A0A1A8UI02;A0A060XJX9;A0A087XQU7;A0A146NIL5;A0A146NIU7;A0A146NJR6;A0A146Q523;A0A146Z4H1;A0A146Z4J7;A0A…	639.152	1.0256	DCEQAENWMAAR	[2] Methylthio (C)	84.18	735.286	1468.56	2	4.578	79.8609
	A0A060XII9;A0A0R4IJ08;A0A0S7GFR3;A0A0S7GFS2;A0A0S7GG64;A0A0S7GKU3;A0A0S7GLM7;A0A1A7WGD9;A0A1A7Z4A6;A0A1A8D2Q6;A0A1A8D8C3;A0A1A8GCR2;A0A1A8I584;A0A1A8KR84;A0A1A8QNY9;A0A1A8SFC1;A0A060XJX9;A0A087XQU7;A0A146NIL5;A0A146NIU7;A0A146NJR6;A0A146Q523;A0A146Z4H1;A0A146Z4J7;A0A146Z4K2;A0A146Z4L3;A0A146Z4P1;A0A146Z5L2;A0A146Z6F5;A0A146Z650;F1R443;F1R446;H2UIA9;H2UIB0;H2UIB1;M4A8R0;W5KTF3;W5KTG2	1.21813	0.849124	EKEPIVGSPDYGKDEDSAEALLK		83.57	623.313	2489.22	4	0.933673	82.5533
	A0A060XII9;A0A0D9SGF6;A0A0P7V2T7;A0A0R4IJ08;A0A0S7GFR3;A0A0S7GFS1;A0A0S7GFS2;A0A0S7GFS3;A0A0S7GG64;A0A0S7GGW2;A0A0S7GGW7;A0A0S7GKU3;A0A0S7GLM7;A0A0S7GNH5;A0A1A7WGD9;A0A1A7Z4A6;A0A1A8AIC9;A0A1A8DRB6;A0A1A8GCR2;A0A1A8MAY9;A0A1A8MXE6;A0A1A8QNY9;A0A1A8RNY5;A0A1A8SFC1;A0A1A8UI02;A0A060XJX9;A0A087XQU7;A0A146NIL5;A0A146NIU7;A0A146NJR6;A0A146Q523;A0A146Z4H1;A0A146Z4J7;A0A146Z4K2;A0A146Z4L3;A0A146Z4P1;A0A…	342.749	49.8991	DADETKEWIEEK		83.48	746.846	1491.68	2	5.32486	44.8114
	A0A060XII9;A0A0D9SGF6;A0A0P7V2T7;A0A0P7VEP4;A0A0R4IJ08;A0A0S7GFQ8;A0A0S7GFR3;A0A0S7GFS1;A0A0S7GFS2;A0A0S7GFS3;A0A0S7GFT9;A0A0S7GG64;A0A0S7GGW2;A0A0S7GGW7;A0A0S7GKU3;A0A0S7GLM7;A0A0S7GNH5;A0A1A7WGD9;A0A1A7Z4A6;A0A1A8AIC9;A0A1A8DRB6;A0A1A8GCR2;A0A1A8KF62;A0A1A8MAY9;A0A1A8MXE6;A0A1A8QNY9;A0A1A8RNY5;A0A1A8SFC1;A0A1A8UI02;A0A060XJX9;A0A087XQU7;A0A146NIL5;A0A146NIU7;A0A146NJR6;A0A146Q523;A0A146Z4H1;A0A…	1.58256	1.52869	DVTGAEALLER		82.72	587.31	1172.6	2	3.83635	77.9559
	A0A060XII9;A0A0D9SGF6;A0A0P7V2T7;A0A0P7VEP4;A0A0R4IJ08;A0A1A7WGD9;A0A1A7Z4A6;A0A1A8D2Q6;A0A1A8D8C3;A0A1A8GCR2;A0A1A8I584;A0A1A8KR84;A0A1A8MAY9;A0A1A8QC83;A0A1A8SFC1;A0A1A8UI02;A0A060XJX9;A0A087XQU7;A0A146Q523;A0A146Z4H1;A0A146Z4J7;A0A146Z4K2;A0A146Z4L3;A0A146Z4P1;A0A146Z5L2;A0A146Z6F5;A0A146Z650;F1R443;F1R446;G3Q393;G3Q398;H2MBY2;H2UIA9;H2UIB0;H2UIB1;H3C0G3;H3CBT9;I3JZ89;I3JZ90;M4A8R0;Q4T9R4;Q4T9…	1.36222	1.05396	HQAFEAELSANQSR		82.34	794.38	1586.75	2	3.32603	40.4952
	A0A060XII9;A0A0D9SGF6;A0A0P7V2T7;A0A0P7VEP4;A0A0R4IJ08;A0A0S7GKE8;A0A0S7GMT1;A0A0S7GQA6;A0A1A7WGD9;A0A1A7Z4A6;A0A1A8D2Q6;A0A1A8D8C3;A0A1A8GCR2;A0A1A8I584;A0A1A8KR84;A0A1A8MAY9;A0A1A8QC83;A0A1A8SFC1;A0A1A8UI02;A0A060XJX9;A0A087XQU7;A0A146Q523;A0A146Z4H1;A0A146Z4K2;A0A146Z4L3;A0A146Z4P1;A0A146Z5L2;A0A146Z6F5;F1R443;F1R446;G3Q393;G3Q398;H2MBY2;H2UIA9;H2UIB0;H2UIB1;H3C0G3;H3CBT9;I3JZ89;I3JZ90;M4A8R0;…	13.9598	12.7181	DLASVQALLR		82.27	543.319	1084.62	2	4.01573	111.985
	A0A060XII9;A0A0R4IJ08;A0A0S7GFS1;A0A0S7GFS2;A0A0S7GFS3;A0A0S7GG64;A0A0S7GGW2;A0A0S7GGW7;A0A0S7GI92;A0A0S7GKU3;A0A0S7GLM7;A0A0S7GLW5;A0A1A7WGD9;A0A1A7Z4A6;A0A1A8AIC9;A0A1A8DRB6;A0A1A8GCR2;A0A1A8KF62;A0A1A8MAY9;A0A1A8MXE6;A0A1A8QNY9;A0A1A8RNY5;A0A1A8SFC1;A0A1A8UI02;A0A060XJX9;A0A087XQU7;A0A146NIL5;A0A146NIU7;A0A146NJR6;A0A146Q523;A0A146Z4J7;A0A146Z4L3;A0A146Z4P1;A0A146Z6F5;A0A146Z650;C0PUV6;F1R443;…	0.00243808	1.43642	QETFDAGLQAFQQEGITNITALKDQLLAAK		81.55	1088.24	3261.69	3	0.395662	190.428
	A0A060XII9;A0A0R4IJ08;A0A0S7GKE8;A0A0S7GKV9;A0A0S7GQU7;A0A1A8D2Q6;A0A1A8D8C3;A0A1A8GCR2;A0A1A8I584;A0A1A8KR84;A0A1A8MAY9;A0A1A8QC83;A0A1A8SFC1;A0A1A8UI02;A0A060XJX9;A0A087XQU7;A0A146Z4H1;A0A146Z4K2;A0A146Z4L3;A0A146Z4P1;A0A146Z5L2;A0A146Z6F5;F1R443;F1R446;G3Q393;G3Q398;H2MBY2;I3JZ89;I3JZ90;M4A8R0;Q32P38;Q566W8;W5KTF3;W5KTG2;W5MFM2;W5MFP4	3.59038	0.31157	DADELEKWIQEK		80.79	752.37	1502.73	2	-2.72521	95.8845
	A0A060XII9;A0A0D9SGF6;A0A0P7V2T7;A0A0P7VEP4;A0A0R4IJ08;A0A0S7GFS1;A0A0S7GFS2;A0A0S7GFS3;A0A0S7GG64;A0A0S7GGW2;A0A0S7GGW7;A0A0S7GI92;A0A0S7GKU3;A0A0S7GLM7;A0A0S7GLW5;A0A1A7WGD9;A0A1A7Z4A6;A0A1A8AIC9;A0A1A8DRB6;A0A1A8GCR2;A0A1A8KF62;A0A1A8MAY9;A0A1A8MXE6;A0A1A8QNY9;A0A1A8RNY5;A0A1A8SFC1;A0A1A8UI02;A0A060XJX9;A0A087XQU7;A0A146NIL5;A0A146NIU7;A0A146NJR6;A0A146Q523;A0A146Z4J7;A0A146Z4K2;A0A146Z4L3;A0A…	3.42187	0.776863	ADVVESWIGEK		80.45	616.814	1231.61	2	3.30561	81.7777
	A0A060XII9;A0A0S7GFS2;A0A0S7GFS3;A0A0S7GGW7;A0A0S7GI92;A0A0S7GKU3;A0A1A7WGD9;A0A1A7Z4A6;A0A1A8AIC9;A0A1A8DRB6;A0A1A8GCR2;A0A1A8KF62;A0A1A8MAY9;A0A1A8MXE6;A0A1A8QNY9;A0A1A8RNY5;A0A1A8SFC1;A0A1A8UI02;A0A060XJX9;A0A146NIU7;A0A146Q523;A0A146Z4J7;A0A146Z4L3;A0A146Z4P1;A0A146Z6F5;A0A146Z650;C0PUV6;F1R446;G3Q393;G3Q398;H2MBY2;H3C0G3;H3CBT9;I3JZ89;Q13813;W5KTG2;W5MFM2	3.63141	5.60988	TYLLDGSCMVEESGTLESQLEATKR	[8] Methylthio (C)	79.79	936.109	2805.3	3	4.90607	152.98
	A0A060XII9;A0A0D9SGF6;A0A0P7V2T7;A0A0P7VEP4;A0A0R4IJ08;A0A0S7GKE8;A0A0S7GMT1;A0A0S7GQA6;A0A1A7WGD9;A0A1A7Z4A6;A0A1A8D2Q6;A0A1A8D8C3;A0A1A8GCR2;A0A1A8I584;A0A1A8KR84;A0A1A8MAY9;A0A1A8QC83;A0A1A8SFC1;A0A1A8UI02;A0A060XJX9;A0A087XQU7;A0A146Q523;A0A146Z4H1;A0A146Z4K2;A0A146Z4L3;A0A146Z4P1;A0A146Z5L2;A0A146Z6F5;A0A146Z650;F1R443;F1R446;G3Q393;G3Q398;H2MBY2;H2UIA9;H2UIB0;H2UIB1;H3C0G3;H3CBT9;I3JZ89;I3J…	4.51153	0.892071	DTEQVDNWMSK		79.45	676.796	1351.58	2	5.05027	55.3468
	A0A060XII9;A0A1A7WGD9;A0A1A7Z4A6;A0A1A8D2Q6;A0A1A8GCR2;A0A1A8I584;A0A1A8KR84;A0A1A8MXE6;A0A1A8QNY9;A0A1A8SFC1;A0A060XJX9;W5KTF3;W5KTG2	4.24954	2.61477	EGALTNEEVGSDLEQVEVLQK		79.15	763.052	2286.13	3	6.33243	109.237
	A0A060XII9;A0A0R4IJ08;A0A0S7GFS1;A0A0S7GFS2;A0A0S7GFS3;A0A0S7GG64;A0A0S7GGW2;A0A0S7GGW7;A0A0S7GI92;A0A0S7GKU3;A0A0S7GLM7;A0A0S7GLW5;A0A1A7WGD9;A0A1A7Z4A6;A0A1A8AIC9;A0A1A8DRB6;A0A1A8GCR2;A0A1A8KF62;A0A1A8MAY9;A0A1A8MXE6;A0A1A8QNY9;A0A1A8RNY5;A0A1A8SFC1;A0A1A8UI02;A0A060XJX9;A0A087XQU7;A0A146NIL5;A0A146NIU7;A0A146NJR6;A0A146Q523;A0A146Z4J7;A0A146Z4L3;A0A146Z4P1;A0A146Z6F5;A0A146Z650;C0PUV6;F1R443;…	1158.65	1.01947	QETFDAGLQAFQQEGITNITALKDQLLAAK		78.96	816.434	3261.71	4	4.85996	190.921
	A0A060XII9;A0A0R4IJ08;A0A0S7GFS1;A0A0S7GFS2;A0A0S7GFS3;A0A0S7GG64;A0A0S7GGW2;A0A0S7GGW7;A0A0S7GI92;A0A0S7GKU3;A0A0S7GLM7;A0A0S7GLW5;A0A1A7WGD9;A0A1A7Z4A6;A0A1A8AIC9;A0A1A8DRB6;A0A1A8GCR2;A0A1A8KF62;A0A1A8MAY9;A0A1A8MXE6;A0A1A8QNY9;A0A1A8RNY5;A0A1A8SFC1;A0A1A8UI02;A0A060XJX9;A0A087XQU7;A0A146NIL5;A0A146NIU7;A0A146NJR6;A0A146Q523;A0A146Z4J7;A0A146Z4L3;A0A146Z4P1;A0A146Z6F5;A0A146Z650;C0PUV6;F1R443;…	176.05	1.01947	QETFDAGLQAFQQEGITNITALKDQLLAAK	[N-term] Gln->pyro-Glu (N-term Q)	77.51	1082.57	3244.68	3	4.79505	192.126
	A0A060XII9;A0A0P7VEP4;A0A0R4IJ08;A0A0S7GKQ9;A0A0S7GMT1;A0A0S7GRJ6;A0A1A7WGD9;A0A1A7Z4A6;A0A1A8D2Q6;A0A1A8D8C3;A0A1A8GCR2;A0A1A8I584;A0A1A8KR84;A0A1A8MAY9;A0A1A8QC83;A0A1A8SFC1;A0A1A8UI02;A0A087XQU7;A0A146Q523;A0A146Z4H1;A0A146Z4K2;A0A146Z4L3;A0A146Z4P1;A0A146Z5L2;A0A146Z6F5;A0A146Z650;F1R443;F1R446;G3Q393;G3Q398;H2UIA9;H2UIB0;H2UIB1;H3C0G3;H3CBT9;I3JZ89;I3JZ90;M4A8R0;Q4T9R4;Q4T9R5;W5KTF3;W5KTG2;W…	1.19251	1.01947	RAALEDSFHLQQFFR		77.08	622.323	1863.95	3	3.76403	124.952
	A0A060XII9;A0A0R4IJ08;A0A0S7GFR3;A0A0S7GFS3;A0A0S7GG64;A0A0S7GGW2;A0A0S7GKU3;A0A0S7GNH5;A0A1A7WGD9;A0A1A7Z4A6;A0A1A8AIC9;A0A1A8DRB6;A0A1A8GCR2;A0A1A8KF62;A0A1A8MAY9;A0A1A8MXE6;A0A1A8QNY9;A0A1A8RNY5;A0A1A8SFC1;A0A1A8UI02;A0A060XJX9;A0A087XQU7;A0A146NIL5;A0A146NIU7;A0A146NJR6;A0A146Z4H1;A0A146Z4P1;F1R446;G3Q398;H2MBY2;H2UIB0;I3JZ89;M4A8R0;W5KTF3;W5KTG2;W5MFM2;W5MFP4	1.81363	0.890157	LQTATDESYKDPTNIQLSK		77.03	718.032	2151.07	3	1.28737	63.1219
	A0A060XII9;A0A0D9SGF6;A0A0P7V2T7;A0A0P7VEP4;A0A0R4IJ08;A0A0S7GFS1;A0A0S7GFS2;A0A0S7GFS3;A0A0S7GG64;A0A0S7GGW2;A0A0S7GGW7;A0A0S7GI92;A0A0S7GKU3;A0A0S7GLM7;A0A0S7GLW5;A0A1A7WGD9;A0A1A7Z4A6;A0A1A8AIC9;A0A1A8DRB6;A0A1A8GCR2;A0A1A8KF62;A0A1A8MAY9;A0A1A8MXE6;A0A1A8QNY9;A0A1A8RNY5;A0A1A8SFC1;A0A1A8UI02;A0A060XJX9;A0A087XQU7;A0A146NIL5;A0A146NIU7;A0A146NJR6;A0A146Q523;A0A146Z4J7;A0A146Z4K2;A0A146Z4L3;A0A…	1.51824	0.852764	DLSSVQTLLTK		76.54	602.844	1203.67	2	2.8522	99.131
	A0A060XII9;A0A060XJX9;W5KTF3;W5KTG2	1.11943	0.980359	DLAALEDKVNTLGGEAER		75.98	634.326	1899.95	3	2.5623	100.048
	A0A060XII9;A0A0P7VEP4;A0A0R4IJ08;A0A0S7GKQ9;A0A0S7GMT1;A0A0S7GRJ6;A0A1A7WGD9;A0A1A7Z4A6;A0A1A8D2Q6;A0A1A8D8C3;A0A1A8GCR2;A0A1A8I584;A0A1A8KR84;A0A1A8MAY9;A0A1A8QC83;A0A1A8SFC1;A0A1A8UI02;A0A060XJX9;A0A087XQU7;A0A146Q523;A0A146Z4H1;A0A146Z4K2;A0A146Z4L3;A0A146Z4P1;A0A146Z5L2;A0A146Z6F5;A0A146Z650;F1R443;F1R446;G3Q393;G3Q398;H2MBY2;H2UIA9;H2UIB0;H2UIB1;H3C0G3;H3CBT9;I3JZ89;I3JZ90;M4A8R0;Q4T9R4;Q4T9…	1.13379	1.01947	DSDELKSWINEK		75.04	732.356	1462.7	2	5.36109	70.5467
	A0A060XII9;A0A0D9SFF6;A0A0D9SGF6;A0A0P7VEP4;A0A060XJX9;Q13813;W5MFM2;W5MFP4	1.40401	0.731971	LQIASDENYKDPTNLQGK		74.98	678.678	2033.01	3	0.485343	60.3036
	A0A060XII9;A0A0D9SGF6;A0A0P7V2T7;A0A0P7VEP4;A0A0R4IJ08;A0A0S7GFS1;A0A0S7GFS2;A0A0S7GFS3;A0A0S7GG64;A0A0S7GGW2;A0A0S7GGW7;A0A0S7GI92;A0A0S7GKU3;A0A0S7GLM7;A0A0S7GLW5;A0A1A7WGD9;A0A1A7Z4A6;A0A1A8AIC9;A0A1A8DRB6;A0A1A8GCR2;A0A1A8KF62;A0A1A8MAY9;A0A1A8MXE6;A0A1A8QNY9;A0A1A8RNY5;A0A1A8SFC1;A0A1A8UI02;A0A060XJX9;A0A087XQU7;A0A146NIL5;A0A146NIU7;A0A146NJR6;A0A146Q523;A0A146Z4J7;A0A146Z4K2;A0A146Z4L3;A0A…	1.03818	0.845309	ASAFNSWFENAEEDLTDPVR		74.24	1149.52	2297.03	2	4.16893	161.833
	A0A060XII9;A0A0D9SGF6;A0A0P7VEP4;A0A0R4IJ08;A0A0S7GFR3;A0A0S7GFS2;A0A0S7GG64;A0A0S7GKU3;A0A0S7GLM7;A0A1A7WGD9;A0A1A7Z4A6;A0A1A8D2Q6;A0A1A8GCR2;A0A1A8I584;A0A1A8KR84;A0A1A8MXE6;A0A1A8QNY9;A0A1A8SFC1;A0A146NIL5;A0A146NIU7;A0A146NJR6;A0A146Q523;A0A146Z4H1;A0A146Z4J7;A0A146Z4K2;A0A146Z4L3;A0A146Z4P1;A0A146Z5L2;A0A146Z6F5;A0A146Z650;F1R443;F1R446;G3Q393;G3Q398;H2MBY2;H2UIA9;H2UIB0;H2UIB1;H3C0G3;H3CBT9…	9.89134	42.8179	KGDILTLLNSTNKDWWK		73.99	678.035	2031.08	3	1.34542	153.628
	A0A060XII9;A0A0D9SGF6;A0A0P7VEP4;A0A0R4IJ08;A0A0S7GKE8;A0A0S7GMT1;A0A0S7GQA6;A0A1A7WGD9;A0A1A7Z4A6;A0A1A8D2Q6;A0A1A8D8C3;A0A1A8GCR2;A0A1A8I584;A0A1A8KR84;A0A1A8MAY9;A0A1A8QC83;A0A1A8SFC1;A0A1A8UI02;A0A060XJX9;A0A087XQU7;A0A146Q523;A0A146Z4H1;A0A146Z4K2;A0A146Z4L3;A0A146Z4P1;A0A146Z5L2;A0A146Z6F5;A0A146Z650;F1R443;F1R446;G3Q393;G3Q398;I3JZ89;I3JZ90;M4A8R0;Q566W8;Q13813;W5KTF3;W5KTG2;W5MFM2;W5MFP4	2.07143	0.191413	DLTSWVTEMK		73.73	605.296	1208.58	2	6.47796	114.66
	A0A060XII9;A0A0P7VEP4;A0A1A7Z4A6;A0A1A8D2Q6;A0A1A8D8C3;A0A1A8GCR2;A0A1A8I584;A0A1A8KR84;A0A1A8MAY9;A0A1A8QC83;A0A1A8SFC1;A0A1A8UI02;A0A060XJX9;G3Q393;G3Q398;W5MFM2;W5MFP4	375.95	325.392	HQAFEAEVQANAGAIIK		72.73	599.649	1795.92	3	2.76581	83.9641
	A0A060XII9;A0A060XJX9;G3Q393;G3Q398;I3JZ89;I3JZ90;W5KTF3;W5KTG2	0.123332	250.724	SGQELLDGK		71.5	473.745	945.476	2	-3.85457	25.547
	A0A060XII9;A0A0R4IJ08;A0A0S7GFQ8;A0A0S7GFR3;A0A0S7GFS1;A0A0S7GFS2;A0A0S7GFS3;A0A0S7GFT9;A0A0S7GG64;A0A0S7GGW2;A0A0S7GGW7;A0A0S7GKU3;A0A0S7GLM7;A0A0S7GNH5;A0A1A7WGD9;A0A1A7Z4A6;A0A1A8AIC9;A0A1A8DRB6;A0A1A8GCR2;A0A1A8KF62;A0A1A8MAY9;A0A1A8MXE6;A0A1A8QNY9;A0A1A8RNY5;A0A1A8SFC1;A0A1A8UI02;A0A060XJX9;A0A087XQU7;A0A146NIL5;A0A146NIU7;A0A146NJR6;A0A146Q523;A0A146Z4H1;A0A146Z4J7;A0A146Z4K2;A0A146Z4L3;A0A…	1.2166	0.487952	EAFLASDDKGDSLDSVEALIK		71.06	741.709	2222.11	3	2.41343	138.153
	A0A060XII9;A0A0D9SGF6;A0A0P7V2T7;A0A0P7VEP4;A0A0R4IJ08;A0A0S7GFS2;A0A0S7GFS3;A0A0S7GGW7;A0A0S7GI92;A0A0S7GKU3;A0A1A7WGD9;A0A1A7Z4A6;A0A1A8AIC9;A0A1A8DRB6;A0A1A8GCR2;A0A1A8KF62;A0A1A8MAY9;A0A1A8MXE6;A0A1A8QNY9;A0A1A8RNY5;A0A1A8SFC1;A0A1A8UI02;A0A060XJX9;A0A087XQU7;A0A146NIU7;A0A146Q523;A0A146Z4J7;A0A146Z4L3;A0A146Z4P1;A0A146Z6F5;A0A146Z650;C0PUV6;F1R443;F1R445;F1R446;F8K8N3;G3Q393;G3Q398;H2MBY2;H2…	748.413	24.6248	KIEDLGAAMEEALILDNK		70.83	987.022	1972.03	2	5.20131	152.693
	A0A060XII9;A0A060XJX9;C0PUV6	1.2127	2.58674	EMPSAFDFVEFTR	[2] Oxidation (M)	69.86	796.365	1590.71	2	9.25324	135.653
	A0A060XII9;A0A0D9SGF6;A0A0P7V2T7;A0A0P7VEP4;A0A0R4IJ08;A0A0S7GFR3;A0A0S7GFS2;A0A0S7GG64;A0A0S7GKU3;A0A0S7GLM7;A0A1A7WGD9;A0A1A7Z4A6;A0A1A8D2Q6;A0A1A8GCR2;A0A1A8I584;A0A1A8KR84;A0A1A8MAY9;A0A1A8SFC1;A0A060XJX9;A0A087XQU7;A0A146NIL5;A0A146NIU7;A0A146NJR6;A0A146Q523;A0A146Z4H1;A0A146Z4J7;A0A146Z4L3;A0A146Z4P1;A0A146Z5L2;A0A146Z6F5;A0A146Z650;F1R443;F1R446;G3Q393;G3Q398;H2MBY2;H2UIA9;H2UIB0;H2UIB1;H3…	0.646554	0.72502	GKDLIGVQNLLK		69.7	649.397	1296.78	2	-1.08841	96.0961
	A0A060XII9;A0A060XJX9;C0PUV6;G3Q393;G3Q398;H2UGD2	0.991535	1.2877	EELYQNLSK		69.51	562.289	1122.56	2	2.28799	40.4952
	A0A060XII9;A0A0P7VEP4;A0A0R4IJ08;A0A060XJX9;F1R443;F1R446;G3Q393;G3Q398;H2UIA9;H2UIB0;H2UIB1;H3C0G3;H3CBT9;I3JZ89;I3JZ90;Q4T9R4;W5KTF3;W5KTG2;W5MFM2;W5MFP4	0.109469	1.64738	LLVSSEDYGR		68.99	569.792	1137.57	2	-0.811243	46.0808
	A0A060XII9;A0A060XJX9	1.02968	0.87738	SGQELLDGKHYAADEVSVR		68.96	519.262	2073.02	4	4.37109	65.1653
	A0A060XII9	252.296	0.147834	DVEDEETWVR		68.89	639.289	1276.56	2	3.2036	57.6147
	A0A060XII9	13.9544	0.892825	IAALQSFADQLVGADHYAKPEISK		68.86	643.844	2571.35	4	6.16233	150.605
	A0A060XII9;A0A0D9SGF6;A0A060XJX9;H2UIA9;H2UIB0;H2UIB1;I3JZ89;I3JZ90;Q13813;W5MFM2;W5MFP4	8.25228	4.76684	SLQQLAEER		68.42	537.284	1072.55	2	3.05578	41.9898
	A0A060XII9;A0A0P7VEP4;A0A060XJX9;W5KTF3;W5KTG2;W5MFM2;W5MFP4	1.25631	0.999104	RDELITNWEQIR		68.21	786.911	1571.81	2	-1.88631	87.0717
	A0A060XII9;A0A0D9SGF6;A0A0P7VEP4;A0A0S7GFR3;A0A0S7GFS2;A0A0S7GG64;A0A0S7GKU3;A0A0S7GLM7;A0A060XJX9;A0A146NIL5;A0A146NIU7;A0A146NJR6;A0A146Q523;A0A146Z4H1;A0A146Z4J7;A0A146Z4K2;A0A146Z4L3;A0A146Z4P1;A0A146Z5L2;A0A146Z6F5;A0A146Z650;Q13813;W5MFM2;W5MFP4	1.01436	1.1392	HQALQAEIAGHEPR		67.76	519.605	1555.79	3	1.33758	40.0654
	A0A060XII9;A0A0R4IJ08;A0A0S7GFR3;A0A0S7GFS2;A0A0S7GG64;A0A0S7GKU3;A0A0S7GLM7;A0A1A7WGD9;A0A1A7Z4A6;A0A1A8D2Q6;A0A1A8D8C3;A0A1A8GCR2;A0A1A8I584;A0A1A8KR84;A0A1A8QNY9;A0A1A8SFC1;A0A060XJX9;A0A087XQU7;A0A146NIL5;A0A146NIU7;A0A146NJR6;A0A146Q523;A0A146Z4H1;A0A146Z4J7;A0A146Z4K2;A0A146Z4L3;A0A146Z4P1;A0A146Z5L2;A0A146Z6F5;A0A146Z650;F1R443;F1R446;H2UIA9;H2UIB0;H2UIB1;M4A8R0;W5KTF3;W5KTG2	1.86448	25.3728	EKEPIVGSPDYGKDEDSAEALLK		67.62	830.747	2489.22	3	-0.0692612	82.4828
	A0A060XII9;A0A0D9SGF6;A0A0P7V2T7;A0A0P7VEP4;A0A0R4IJ08;A0A060XJX9;F1R443;F1R446;G3Q393;G3Q398;H2UIA9;H2UIB0;H2UIB1;H3C0G3;H3CBT9;I3JZ89;I3JZ90;Q4T9R4;Q4T9R5;Q13813;W5KTF3;W5KTG2;W5MFM2;W5MFP4	0.996473	0.855391	TATDEAYKDPSNLQGK		67.48	579.948	1736.82	3	2.06475	28.4351
	A0A060XII9;A0A0D9SGF6;A0A0P7VEP4;A0A0R4IJ08;A0A0S7GFR3;A0A0S7GFS1;A0A0S7GFS2;A0A0S7GFS3;A0A0S7GG64;A0A0S7GGW2;A0A0S7GGW7;A0A0S7GKU3;A0A0S7GLM7;A0A0S7GNH5;A0A1A7WGD9;A0A1A7Z4A6;A0A1A8AIC9;A0A1A8DRB6;A0A1A8GCR2;A0A1A8KF62;A0A1A8MAY9;A0A1A8MXE6;A0A1A8QNY9;A0A1A8RNY5;A0A1A8SFC1;A0A1A8UI02;A0A060XJX9;A0A087XQU7;A0A146NIL5;A0A146NIU7;A0A146NJR6;A0A146Q523;A0A146Z4H1;A0A146Z4J7;A0A146Z4K2;A0A146Z4L3;A0A…	1.68847	1.87492	DLMSWINGIR		67.46	602.812	1203.61	2	-0.298836	155.21
	A0A060XII9;A0A0D9SGF6;A0A0P7V2T7;A0A0P7VEP4;A0A0R4IJ08;A0A0S7GFS1;A0A0S7GFS2;A0A0S7GFS3;A0A0S7GG64;A0A0S7GGW2;A0A0S7GGW7;A0A0S7GI92;A0A0S7GKU3;A0A0S7GLM7;A0A0S7GLW5;A0A1A7WGD9;A0A1A7Z4A6;A0A1A8AIC9;A0A1A8DRB6;A0A1A8GCR2;A0A1A8KF62;A0A1A8MAY9;A0A1A8MXE6;A0A1A8QNY9;A0A1A8RNY5;A0A1A8SFC1;A0A1A8UI02;A0A060XJX9;A0A087XQU7;A0A146NIL5;A0A146NIU7;A0A146NJR6;A0A146Q523;A0A146Z4J7;A0A146Z4K2;A0A146Z4L3;A0A…	44.1651	0.424204	ASAFNSWFENAEEDLTDPVR		66.91	766.686	2297.04	3	6.9364	164.274
	A0A060XII9;A0A1A7WGD9;A0A1A7Z4A6;A0A1A8AIC9;A0A1A8DRB6;A0A1A8GCR2;A0A1A8KF62;A0A1A8MAY9;A0A1A8MXE6;A0A1A8QNY9;A0A1A8RNY5;A0A1A8SFC1;A0A1A8UI02;A0A060XJX9;G3Q393;G3Q398;H2MBY2;H2UIA9;H2UIB0;H2UIB1;H3C0G3;H3CBT9;I3JZ89;I3JZ90;Q4T9R4;W5KTF3;W5KTG2	1.11623	0.116383	GHYASPEIQQK		66.23	419.88	1256.62	3	6.94991	21.7151
	A0A060XII9;A0A0P7VEP4;A0A0R4IJ08;A0A0S7GFS1;A0A0S7GFS2;A0A0S7GFS3;A0A0S7GG64;A0A0S7GGW2;A0A0S7GGW7;A0A0S7GI92;A0A0S7GKU3;A0A0S7GLM7;A0A0S7GLW5;A0A1A7WGD9;A0A1A7Z4A6;A0A1A8AIC9;A0A1A8DRB6;A0A1A8GCR2;A0A1A8KF62;A0A1A8MAY9;A0A1A8MXE6;A0A1A8QNY9;A0A1A8RNY5;A0A1A8SFC1;A0A1A8UI02;A0A060XJX9;A0A087XQU7;A0A146NIL5;A0A146NIU7;A0A146NJR6;A0A146Q523;A0A146Z4J7;A0A146Z4K2;A0A146Z4L3;A0A146Z4P1;A0A146Z6F5;A0A…	357.792	2.6172	CNSLEEIR	[1] Methylthio (C)	65.69	505.229	1008.44	2	4.26409	42.7674
	A0A060XII9;A0A0D9SGF6;A0A0P7V2T7;A0A0P7VEP4;A0A0R4IJ08;A0A0S7GKQ9;A0A0S7GMT1;A0A0S7GRJ6;A0A1A7WGD9;A0A1A7Z4A6;A0A1A8D2Q6;A0A1A8D8C3;A0A1A8GCR2;A0A1A8I584;A0A1A8KR84;A0A1A8MAY9;A0A1A8QC83;A0A1A8SFC1;A0A1A8UI02;A0A060XJX9;A0A087XQU7;A0A146Q523;A0A146Z4H1;A0A146Z4K2;A0A146Z4L3;A0A146Z4P1;A0A146Z5L2;A0A146Z6F5;A0A146Z650;F1R443;F1R446;G3Q393;G3Q398;H2MBY2;H2UIA9;H2UIB0;H2UIB1;H3C0G3;H3CBT9;I3JZ89;I3J…	0.821047	1.11662	ITALDEFATK		65	554.791	1107.57	2	-11.0637	72.3097
	A0A060XII9;A0A0P7VEP4;A0A0R4IJ08;A0A0S7GFQ2;A0A0S7GFQ8;A0A0S7GFR3;A0A0S7GFS1;A0A0S7GFS2;A0A0S7GFS3;A0A0S7GG64;A0A0S7GGW2;A0A0S7GGW7;A0A0S7GI92;A0A0S7GKU3;A0A0S7GLM7;A0A0S7GLW5;A0A0S7GNH5;A0A1A7WGD9;A0A1A7Z4A6;A0A1A8AIC9;A0A1A8DRB6;A0A1A8GCR2;A0A1A8KF62;A0A1A8MAY9;A0A1A8MXE6;A0A1A8QNY9;A0A1A8RNY5;A0A1A8SFC1;A0A1A8UI02;A0A060XJX9;A0A087XQU7;A0A146NIL5;A0A146NIU7;A0A146NJR6;A0A146Q523;A0A146Z4J7;A0A…	1.55949	1.01947	DLDDEESWIKEK		64.98	502.906	1505.7	3	3.79862	67.8497
	A0A060XII9	0.199538	11.7824	SLVSSEELAKDVTGAEALLER		63.98	555.049	2216.17	4	8.0203	154.566
	A0A060XII9;A0A0D9SGF6;A0A0P7V2T7;A0A0P7VEP4;A0A0R4IJ08;A0A0S7GFS2;A0A0S7GFS3;A0A0S7GGW7;A0A0S7GI92;A0A0S7GKU3;A0A1A7WGD9;A0A1A7Z4A6;A0A1A8AIC9;A0A1A8DRB6;A0A1A8GCR2;A0A1A8KF62;A0A1A8MAY9;A0A1A8MXE6;A0A1A8QNY9;A0A1A8RNY5;A0A1A8SFC1;A0A1A8UI02;A0A060XJX9;A0A087XQU7;A0A146NIU7;A0A146Q523;A0A146Z4J7;A0A146Z4L3;A0A146Z4P1;A0A146Z6F5;A0A146Z650;C0PUV6;F1R443;F1R445;F1R446;F8K8N3;G3Q393;G3Q398;H2MBY2;H2…	0.00150252	0.0161301	MQHNLEQQIQAR		63.72	499.254	1494.74	3	-0.210263	31.0477
	A0A060XII9;A0A060XJX9	14.5832	0.330051	RLEAELGAHEPAIQSVQDTGKK		63.54	595.069	2376.25	4	3.21632	65.3767
	A0A060XII9;A0A0P7VEP4;A0A0R4IJ08;A0A0S7GFR3;A0A0S7GFS1;A0A0S7GFS2;A0A0S7GFS3;A0A0S7GG64;A0A0S7GGW2;A0A0S7GGW7;A0A0S7GKU3;A0A0S7GLM7;A0A0S7GNH5;A0A1A7WGD9;A0A1A7Z4A6;A0A1A8AIC9;A0A1A8DRB6;A0A1A8GCR2;A0A1A8KF62;A0A1A8MAY9;A0A1A8MXE6;A0A1A8QNY9;A0A1A8RNY5;A0A1A8SFC1;A0A1A8UI02;A0A060XJX9;A0A087XQU7;A0A146NIL5;A0A146NIU7;A0A146NJR6;A0A146Q523;A0A146Z4H1;A0A146Z4J7;A0A146Z4K2;A0A146Z4L3;A0A146Z4P1;A0A…	1.51961	32.2562	LIQSHPEAVDDIQEK		63.33	574.629	1720.86	3	2.61635	42.2722
	A0A060XII9;A0A0P7V2T7;A0A0P7VEP4;A0A0R4IJ08;A0A0S7GKE8;A0A0S7GMT1;A0A0S7GQA6;A0A1A7WGD9;A0A1A7Z4A6;A0A1A8D2Q6;A0A1A8D8C3;A0A1A8GCR2;A0A1A8I584;A0A1A8KR84;A0A1A8MAY9;A0A1A8QC83;A0A1A8SFC1;A0A1A8UI02;A0A060XJX9;A0A087XQU7;A0A146Q523;A0A146Z4H1;A0A146Z4K2;A0A146Z4L3;A0A146Z4P1;A0A146Z5L2;A0A146Z6F5;A0A146Z650;F1R443;F1R446;G3Q393;G3Q398;H2MBY2;I3JZ89;I3JZ90;M4A8R0;Q566W8;W5KTF3;W5KTG2;W5MFM2;W5MFP4	4.7557	1.01947	ALINADELANDVAGAEALLDR		63.3	1077.56	2153.1	2	2.01469	185.541
	A0A060XII9;A0A0S7GKE8;A0A0S7GMT1;A0A0S7GQA6;A0A060XJX9;A0A087XQU7;M4A8R0	1.2645	0.85369	KFEEFQTDLAAHEERVNEVNQLAGK		62.94	726.365	2901.43	4	0.108056	86.718
	A0A060XII9;A0A0D9SGF6;A0A0P7VEP4;A0A0R4IJ08;A0A0S7GFR3;A0A0S7GFS2;A0A0S7GG64;A0A0S7GKU3;A0A0S7GLM7;A0A1A7WGD9;A0A1A7Z4A6;A0A1A8D2Q6;A0A1A8D8C3;A0A1A8GCR2;A0A1A8I584;A0A1A8KR84;A0A1A8MAY9;A0A1A8QC83;A0A1A8SFC1;A0A1A8UI02;A0A060XJX9;A0A087XQU7;A0A146NJR6;A0A146Q523;A0A146Z4H1;A0A146Z4J7;A0A146Z4K2;A0A146Z4L3;A0A146Z4P1;A0A146Z5L2;A0A146Z6F5;A0A146Z650;F1R443;F1R446;G3Q393;G3Q398;H2MBY2;H2UIA9;H2UIB…	0.908829	0.475904	HALLEADVAAHQDR		62.69	515.936	1544.79	3	10.1322	40.423
	A0A060XII9;A0A0R4IJ08;A0A0S7GFQ8;A0A0S7GFR3;A0A0S7GFS1;A0A0S7GFS2;A0A0S7GFS3;A0A0S7GFT9;A0A0S7GG64;A0A0S7GGW2;A0A0S7GGW7;A0A0S7GKU3;A0A0S7GLM7;A0A0S7GNH5;A0A1A7WGD9;A0A1A7Z4A6;A0A1A8AIC9;A0A1A8DRB6;A0A1A8GCR2;A0A1A8KF62;A0A1A8MAY9;A0A1A8MXE6;A0A1A8QNY9;A0A1A8RNY5;A0A1A8SFC1;A0A1A8UI02;A0A060XJX9;A0A087XQU7;A0A146NIL5;A0A146NIU7;A0A146NJR6;A0A146Q523;A0A146Z4H1;A0A146Z4J7;A0A146Z4K2;A0A146Z4L3;A0A…	1.64574	1.01947	EAFLASDDKGDSLDSVEALIK		62.33	1112.06	2222.1	2	1.50482	138.153
	A0A060XII9;A0A060XJX9;C0PUV6	5.68741	0.988956	EMPSAFDFVEFTR		62.1	788.364	1574.71	2	2.55917	146.885
	A0A060XII9;A0A0D9SGF6;A0A0P7VEP4;A0A0R4IJ08;A0A0S7GFQ2;A0A0S7GFQ8;A0A0S7GFR3;A0A0S7GFS1;A0A0S7GFS2;A0A0S7GFS3;A0A0S7GG64;A0A0S7GGW2;A0A0S7GGW7;A0A0S7GI92;A0A0S7GKU3;A0A0S7GLM7;A0A0S7GLW5;A0A0S7GNH5;A0A1A7WGD9;A0A1A7Z4A6;A0A1A8AIC9;A0A1A8DRB6;A0A1A8GCR2;A0A1A8KF62;A0A1A8MAY9;A0A1A8MXE6;A0A1A8QNY9;A0A1A8RNY5;A0A1A8SFC1;A0A1A8UI02;A0A060XJX9;A0A087XQU7;A0A146NIL5;A0A146NIU7;A0A146NJR6;A0A146Q523;A0A…	4.71858	1.01947	LEESLEYQQFVANVEEEEAWINEK		62.07	976.131	2925.37	3	4.07214	165.566
	A0A060XII9	335.76	0.980491	LGQFEEHWTELKDLAAAR		61.82	529.275	2113.07	4	5.59239	120.162
	A0A060XII9;A0A0P7VEP4;A0A0R4IJ08;A0A0S7GKQ9;A0A0S7GMT1;A0A0S7GRJ6;A0A1A7WGD9;A0A1A7Z4A6;A0A1A8D2Q6;A0A1A8D8C3;A0A1A8GCR2;A0A1A8I584;A0A1A8KR84;A0A1A8MAY9;A0A1A8QC83;A0A1A8SFC1;A0A1A8UI02;A0A087XQU7;A0A146Q523;A0A146Z4H1;A0A146Z4K2;A0A146Z4L3;A0A146Z4P1;A0A146Z5L2;A0A146Z6F5;A0A146Z650;F1R443;F1R446;G3Q393;G3Q398;H2UIA9;H2UIB0;H2UIB1;H3C0G3;H3CBT9;I3JZ89;I3JZ90;M4A8R0;Q4T9R4;Q4T9R5;W5KTF3;W5KTG2;W…	0.396837	0.831982	AALEDSFHLQQFFR		60.37	570.291	1707.85	3	6.80052	138.511
	A0A060XII9;A0A0P7VEP4;A0A0R4IJ08;A0A0S7GFQ2;A0A0S7GFQ8;A0A0S7GFR3;A0A0S7GFS1;A0A0S7GFS2;A0A0S7GFS3;A0A0S7GG64;A0A0S7GGW2;A0A0S7GGW7;A0A0S7GI92;A0A0S7GKU3;A0A0S7GLM7;A0A0S7GLW5;A0A0S7GNH5;A0A1A7WGD9;A0A1A7Z4A6;A0A1A8AIC9;A0A1A8DRB6;A0A1A8GCR2;A0A1A8KF62;A0A1A8MAY9;A0A1A8MXE6;A0A1A8QNY9;A0A1A8RNY5;A0A1A8SFC1;A0A1A8UI02;A0A060XJX9;A0A087XQU7;A0A146NIL5;A0A146NIU7;A0A146NJR6;A0A146Q523;A0A146Z4J7;A0A…	7.88007	0.0992557	DLDDEESWIK		60.1	625.285	1248.56	2	4.38244	78.0972
	A0A060XII9;A0A0P7VEP4;A0A060XJX9;W5KTF3;W5KTG2;W5MFM2;W5MFP4	1.2209	0.885881	RDELITNWEQIR		59.13	524.945	1571.81	3	1.41583	87.0717
	A0A060XII9;A0A0D9SGF6;A0A0P7V2T7;A0A0P7VEP4;A0A0R4IJ08;A0A0S7GFQ2;A0A0S7GFQ8;A0A0S7GFR3;A0A0S7GFS1;A0A0S7GFS2;A0A0S7GFS3;A0A0S7GG64;A0A0S7GGW2;A0A0S7GGW7;A0A0S7GI92;A0A0S7GKU3;A0A0S7GLM7;A0A0S7GLW5;A0A0S7GNH5;A0A1A7WGD9;A0A1A7Z4A6;A0A1A8AIC9;A0A1A8DRB6;A0A1A8GCR2;A0A1A8KF62;A0A1A8MAY9;A0A1A8MXE6;A0A1A8QNY9;A0A1A8RNY5;A0A1A8SFC1;A0A1A8UI02;A0A060XJX9;A0A087XQU7;A0A146NIL5;A0A146NIU7;A0A146NJR6;A0A…	0.128867	41.2466	HQAFEAELHANADR		59.07	536.923	1607.75	3	3.95866	36.1187
	A0A060XII9;A0A060XJX9;C0PUV6	924.684	47.2475	ALSVDAKPYVTKEELYQNLSK		58.43	799.431	2395.27	3	4.45808	87.213
	A0A060XII9;A0A0R4IJ08;A0A0S7GFR3;A0A0S7GFS1;A0A0S7GFS2;A0A0S7GFS3;A0A0S7GG64;A0A0S7GGW2;A0A0S7GGW7;A0A0S7GKU3;A0A0S7GLM7;A0A0S7GNH5;A0A1A7WGD9;A0A1A7Z4A6;A0A1A8AIC9;A0A1A8DRB6;A0A1A8GCR2;A0A1A8MAY9;A0A1A8MXE6;A0A1A8QNY9;A0A1A8RNY5;A0A1A8SFC1;A0A1A8UI02;A0A060XJX9;A0A087XQU7;A0A146NIL5;A0A146NIU7;A0A146NJR6;A0A146Q523;A0A146Z4H1;A0A146Z4J7;A0A146Z4K2;A0A146Z4L3;A0A146Z4P1;A0A146Z5L2;A0A146Z6F5;A0A…	1.11941	0.935289	SNMLGSAHEVQR		58.43	443.55	1327.63	3	-0.271899	27.1652
	A0A060XII9;A0A0D9SGF6;A0A0P7VEP4;A0A0R4IJ08;A0A0S7GKE8;A0A0S7GMT1;A0A0S7GQA6;A0A1A7WGD9;A0A1A7Z4A6;A0A1A8D2Q6;A0A1A8D8C3;A0A1A8GCR2;A0A1A8I584;A0A1A8KR84;A0A1A8MAY9;A0A1A8QC83;A0A1A8SFC1;A0A1A8UI02;A0A060XJX9;A0A087XQU7;A0A146Q523;A0A146Z4H1;A0A146Z4K2;A0A146Z4L3;A0A146Z4P1;A0A146Z5L2;A0A146Z6F5;F1R443;F1R446;G3Q393;G3Q398;H2MBY2;H2UIA9;H2UIB0;H2UIB1;H3C0G3;H3CBT9;M4A8R0;Q4T9R4;Q566W8;Q13813;W5KT…	9.5342	1.23316	EQLMASDDFGR		57.64	634.784	1267.55	2	1.9613	56.4104
	A0A060XII9;A0A060XJX9	0.957921	0.953314	LSQESHPEAELIVR		57.4	536.619	1606.83	3	3.01028	58.1087
	A0A060XII9;A0A0D9SGF6;A0A0P7VEP4;A0A0R4IJ08;A0A0S7GKE8;A0A0S7GMT1;A0A0S7GQA6;A0A1A7WGD9;A0A1A7Z4A6;A0A1A8D2Q6;A0A1A8D8C3;A0A1A8GCR2;A0A1A8I584;A0A1A8KR84;A0A1A8MAY9;A0A1A8QC83;A0A1A8SFC1;A0A1A8UI02;A0A060XJX9;A0A087XQU7;A0A146Q523;A0A146Z4H1;A0A146Z4K2;A0A146Z4L3;A0A146Z4P1;A0A146Z5L2;A0A146Z6F5;F1R443;F1R446;G3Q393;G3Q398;H2MBY2;H2UIA9;H2UIB0;H2UIB1;H3C0G3;H3CBT9;M4A8R0;Q4T9R4;Q566W8;Q13813;W5KT…	0.0416343	6.13441	EKEQLMASDDFGRDLASVQALLR		57.25	648.836	2591.31	4	5.12752	164.992
	A0A060XII9;A0A0P7VEP4;A0A0R4IJ08;A0A0S7GKQ9;A0A0S7GMT1;A0A0S7GRJ6;A0A1A7WGD9;A0A1A7Z4A6;A0A1A8D2Q6;A0A1A8D8C3;A0A1A8GCR2;A0A1A8I584;A0A1A8KR84;A0A1A8MAY9;A0A1A8QC83;A0A1A8SFC1;A0A1A8UI02;A0A087XQU7;A0A146Q523;A0A146Z4H1;A0A146Z4K2;A0A146Z4L3;A0A146Z4P1;A0A146Z5L2;A0A146Z6F5;A0A146Z650;F1R443;F1R446;G3Q393;G3Q398;H2UIA9;H2UIB0;H2UIB1;H3C0G3;H3CBT9;I3JZ89;I3JZ90;M4A8R0;Q4T9R4;Q4T9R5;W5KTF3;W5KTG2;W…	1.03818	313.195	RAALEDSFHLQQFFR		57.22	466.997	1863.96	4	9.12968	123.824
	A0A060XII9;A0A0D9SGF6;A0A0P7V2T7;A0A0P7VEP4;A0A0R4IJ08;A0A0S7GFQ8;A0A0S7GFR3;A0A0S7GFS1;A0A0S7GFS2;A0A0S7GFS3;A0A0S7GFT9;A0A0S7GG64;A0A0S7GGW2;A0A0S7GGW7;A0A0S7GKU3;A0A0S7GLM7;A0A0S7GNH5;A0A1A7WGD9;A0A1A7Z4A6;A0A1A8AIC9;A0A1A8DRB6;A0A1A8GCR2;A0A1A8KF62;A0A1A8MAY9;A0A1A8MXE6;A0A1A8QNY9;A0A1A8RNY5;A0A1A8SFC1;A0A1A8UI02;A0A060XJX9;A0A087XQU7;A0A146NIL5;A0A146NIU7;A0A146NJR6;A0A146Q523;A0A146Z4H1;A0A…	176.124	1.01947	SKLGESQTLQQFSR		57.05	804.917	1607.82	2	-6.37406	53.0722
	A0A060XII9;A0A060XJX9;C0PUV6	0.0019573	0.0106011	ALSVDAKPYVTKEELYQNLSK		56.54	599.825	2395.27	4	3.71417	86.6474
	A0A060XII9;A0A0D9SGF6;A0A0P7V2T7;A0A0P7VEP4;A0A0R4IJ08;A0A0S7GKE8;A0A0S7GMT1;A0A0S7GQA6;A0A1A7WGD9;A0A1A7Z4A6;A0A1A8D2Q6;A0A1A8D8C3;A0A1A8GCR2;A0A1A8I584;A0A1A8KR84;A0A1A8MAY9;A0A1A8QC83;A0A1A8SFC1;A0A1A8UI02;A0A060XJX9;A0A087XQU7;A0A146Q523;A0A146Z4H1;A0A146Z4K2;A0A146Z4L3;A0A146Z4P1;A0A146Z5L2;A0A146Z6F5;F1R443;F1R446;H2UIA9;H2UIB0;H2UIB1;I3JZ89;I3JZ90;M4A8R0;Q4T9R4;Q4T9R5;Q566W8;Q13813;W5KTF3;…	1.06504	1.20015	FNRDVDETISWIK		56.12	541.613	1621.82	3	3.67186	98.3523
	A0A060XII9;A0A0D9SGF6;A0A0P7V2T7;A0A0R4IJ08;A0A0S7GFR3;A0A0S7GFS1;A0A0S7GFS2;A0A0S7GFS3;A0A0S7GG64;A0A0S7GGW2;A0A0S7GGW7;A0A0S7GKU3;A0A0S7GLM7;A0A0S7GNH5;A0A1A7WGD9;A0A1A7Z4A6;A0A1A8AIC9;A0A1A8DRB6;A0A1A8GCR2;A0A1A8MAY9;A0A1A8MXE6;A0A1A8QNY9;A0A1A8RNY5;A0A1A8SFC1;A0A1A8UI02;A0A060XJX9;A0A087XQU7;A0A146NIL5;A0A146NIU7;A0A146NJR6;A0A146Q523;A0A146Z4H1;A0A146Z4J7;A0A146Z4K2;A0A146Z4L3;A0A146Z4P1;A0A…	377.696	18.7436	DADETKEWIEEK		55.6	498.234	1491.68	3	7.33982	44.8114
	A0A060XII9;A0A0R4IJ08;A0A087XQU7;F1R443;F1R445;F1R446;M4A8R0;Q56A42	0.898077	1.15362	LLEAQDHFR		53.96	376.865	1127.57	3	3.64901	40.0654
	A0A060XII9;A0A0D9SGF6;A0A0P7VEP4;A0A0R4IJ08;A0A0S7GKE8;A0A0S7GMT1;A0A0S7GQA6;A0A1A7WGD9;A0A1A7Z4A6;A0A1A8D2Q6;A0A1A8D8C3;A0A1A8GCR2;A0A1A8I584;A0A1A8KR84;A0A1A8MAY9;A0A1A8QC83;A0A1A8SFC1;A0A1A8UI02;A0A060XJX9;A0A087XQU7;A0A146Q523;A0A146Z4H1;A0A146Z4K2;A0A146Z4L3;A0A146Z4P1;A0A146Z5L2;A0A146Z6F5;F1R443;F1R446;G3Q393;G3Q398;H2MBY2;H2UIA9;H2UIB0;H2UIB1;H3C0G3;H3CBT9;M4A8R0;Q4T9R4;Q566W8;Q13813;W5KT…	0.13822	0.0380785	EQLMASDDFGRDLASVQALLR		53.67	779.066	2334.18	3	7.43772	168.006
	A0A060XII9	0.233914	0.0652779	LQQLFRDVEDEETWVR		53.16	688.353	2062.04	3	13.0627	117.477
	A0A060XII9;A0A060XJX9	11.5128	0.884338	GEAMVEEGHFAGEEVK		53.01	573.597	1717.77	3	5.08649	52.86
	A0A060XII9;A0A0P7VEP4;A0A0R4IJ08;A0A0S7GFR3;A0A0S7GFS1;A0A0S7GFS2;A0A0S7GFS3;A0A0S7GG64;A0A0S7GGW2;A0A0S7GGW7;A0A0S7GKU3;A0A0S7GLM7;A0A0S7GNH5;A0A1A7WGD9;A0A1A7Z4A6;A0A1A8AIC9;A0A1A8DRB6;A0A1A8GCR2;A0A1A8KF62;A0A1A8MAY9;A0A1A8MXE6;A0A1A8QNY9;A0A1A8RNY5;A0A1A8SFC1;A0A1A8UI02;A0A060XJX9;A0A087XQU7;A0A146NIL5;A0A146NIU7;A0A146NJR6;A0A146Q523;A0A146Z4H1;A0A146Z4J7;A0A146Z4K2;A0A146Z4L3;A0A146Z4P1;A0A…	7.67321	210.65	LIQSHPEAVDDIQEK		52.66	861.44	1720.86	2	2.68113	42.2016
	A0A060XII9;A0A0D9SGF6;A0A0P7V2T7;A0A0P7VEP4;A0A0R4IJ08;A0A0S7GFR3;A0A0S7GFS2;A0A0S7GG64;A0A0S7GKU3;A0A0S7GLM7;A0A1A7WGD9;A0A1A7Z4A6;A0A1A8D2Q6;A0A1A8D8C3;A0A1A8GCR2;A0A1A8I584;A0A1A8KR84;A0A1A8MAY9;A0A1A8QC83;A0A1A8SFC1;A0A1A8UI02;A0A060XJX9;A0A087XQU7;A0A146NJR6;A0A146Q523;A0A146Z4H1;A0A146Z4J7;A0A146Z4K2;A0A146Z4L3;A0A146Z4P1;A0A146Z5L2;A0A146Z6F5;A0A146Z650;F1R443;F1R446;G3Q393;G3Q398;H2MBY2;H…	1.0417	0.0543832	LREANQQQQFNR		52.37	511.262	1530.76	3	-4.27043	20.2292
	A0A060XII9;A0A060XJX9	1.04031	8.8052	AVTQKGEAMVEEGHFAGEEVK		51.23	562.277	2245.08	4	4.12197	58.25
	A0A060XII9;A0A0D9SGF6;A0A0P7V2T7;A0A0P7VEP4;A0A0R4IJ08;A0A0S7GKE8;A0A0S7GMT1;A0A0S7GQA6;A0A1A7WGD9;A0A1A7Z4A6;A0A1A8D2Q6;A0A1A8D8C3;A0A1A8GCR2;A0A1A8I584;A0A1A8KR84;A0A1A8MAY9;A0A1A8QC83;A0A1A8SFC1;A0A1A8UI02;A0A060XJX9;A0A087XQU7;A0A146Q523;A0A146Z4H1;A0A146Z4K2;A0A146Z4L3;A0A146Z4P1;A0A146Z5L2;A0A146Z6F5;F1R443;F1R446;G3Q393;G3Q398;H2UIA9;H2UIB0;H2UIB1;H3C0G3;H3CBT9;I3JZ89;I3JZ90;M4A8R0;Q4T9R4;…	0.0367097	0.749109	DVDETISWIK		51.1	603.309	1204.6	2	2.06903	95.814
	A0A060XII9;A0A060XJX9;C0PUV6	0.00380664	1.01947	NTTGVTEDALKEFSMMFK		50.74	1024.99	2047.96	2	-1.91757	172.941
	A0A060XII9;A0A0D9SGF6;A0A0P7VEP4;A0A0R4IJ08;A0A0S7GFR3;A0A0S7GFS2;A0A0S7GG64;A0A0S7GKU3;A0A0S7GLM7;A0A1A7WGD9;A0A1A7Z4A6;A0A1A8D2Q6;A0A1A8D8C3;A0A1A8GCR2;A0A1A8I584;A0A1A8KR84;A0A1A8MAY9;A0A1A8QC83;A0A1A8SFC1;A0A1A8UI02;A0A060XJX9;A0A087XQU7;A0A146NJR6;A0A146Q523;A0A146Z4H1;A0A146Z4J7;A0A146Z4K2;A0A146Z4L3;A0A146Z4P1;A0A146Z5L2;A0A146Z6F5;A0A146Z650;F1R443;F1R446;G3Q393;G3Q398;H2UIA9;H2UIB0;H2UIB…	1.30642	0.821557	LLEATELK		50.6	458.772	915.529	2	-0.816887	51.8015
	A0A060XII9;A0A060XJX9;C0PUV6	1.03818	1.10592	EMPSAFDFVEFTR		50.38	525.913	1574.72	3	3.72373	146.956
	A0A060XII9;A0A0P7VEP4;A0A0S7GKE8;A0A0S7GMT1;A0A0S7GQA6;A0A060XJX9;A0A087XQU7;G3Q393;G3Q398;H2MBY2;M4A8R0;W5KTF3;W5KTG2	0.00302745	0.927096	LQQTHPQNASQIHLK		50.1	581.649	1741.92	3	2.82737	28.7175
	A0A060XII9;A0A0D9SGF6;A0A0P7VEP4;A0A060XJX9;G3Q393;G3Q398;H2MBY2;H2UIA9;H2UIB0;H2UIB1;H3C0G3;H3CBT9;I3JZ89;I3JZ90;Q4T9R4;Q4T9R5;Q13813;W5KTF3;W5KTG2	0.245887	216.521	EKEPIAASTNR		49.93	405.882	1214.62	3	-5.4443	13.345
	A0A060XII9;A0A0P7VEP4;A0A0R4IJ08;A0A060XJX9;F1R443;F1R446;G3Q393;G3Q398;H2UIA9;H2UIB0;H2UIB1;H3C0G3;H3CBT9;I3JZ89;I3JZ90;Q4T9R4;W5KTF3;W5KTG2;W5MFM2;W5MFP4	0.837064	1.10897	LLVSSEDYGRDLTGVQNLR		48.03	712.376	2134.11	3	2.65968	98.3523
	A0A060XII9;A0A0D9SGF6;A0A0P7V2T7;A0A0P7VEP4;A0A0R4IJ08;A0A0S7GFQ2;A0A0S7GFQ8;A0A0S7GFR3;A0A0S7GFS1;A0A0S7GFS2;A0A0S7GFS3;A0A0S7GG64;A0A0S7GGW2;A0A0S7GGW7;A0A0S7GI92;A0A0S7GKU3;A0A0S7GLM7;A0A0S7GLW5;A0A0S7GNH5;A0A1A7WGD9;A0A1A7Z4A6;A0A1A8AIC9;A0A1A8DRB6;A0A1A8GCR2;A0A1A8KF62;A0A1A8MAY9;A0A1A8MXE6;A0A1A8QNY9;A0A1A8RNY5;A0A1A8SFC1;A0A1A8UI02;A0A060XJX9;A0A087XQU7;A0A146NIL5;A0A146NIU7;A0A146NJR6;A0A…	0.953975	0.827656	DLTGVQNLR		47.62	508.28	1014.55	2	-4.07736	50.4624
	A0A060XII9;A0A0P7VEP4;A0A0S7GKE8;A0A0S7GMT1;A0A0S7GQA6;A0A060XJX9;A0A087XQU7;G3Q393;G3Q398;H2MBY2;M4A8R0;W5KTF3;W5KTG2	0.108311	0.892203	LQQTHPQNASQIHLK		47.42	436.489	1741.93	4	4.37772	28.7175
	A0A060XII9;A0A0D9SGF6;A0A0P7V2T7;A0A0P7VEP4;A0A0R4IJ08;A0A0S7GFQ8;A0A0S7GFR3;A0A0S7GFS1;A0A0S7GFS2;A0A0S7GFS3;A0A0S7GFT9;A0A0S7GG64;A0A0S7GGW2;A0A0S7GGW7;A0A0S7GKU3;A0A0S7GLM7;A0A0S7GNH5;A0A1A7WGD9;A0A1A7Z4A6;A0A1A8AIC9;A0A1A8DRB6;A0A1A8GCR2;A0A1A8KF62;A0A1A8MAY9;A0A1A8MXE6;A0A1A8QNY9;A0A1A8RNY5;A0A1A8SFC1;A0A1A8UI02;A0A060XJX9;A0A087XQU7;A0A146NIL5;A0A146NIU7;A0A146NJR6;A0A146Q523;A0A146Z4H1;A0A…	11.0449	93.973	SKLGESQTLQQFSR		46.81	536.945	1607.81	3	-10.3331	53.0722
	A0A060XII9;A0A060XJX9	2.50218	0.193295	HYAADEVSVR		46.8	573.783	1145.55	2	1.9478	24.5531
	A0A060XII9	1.46361	33.3331	LGQFEEHWTELK		44.47	506.256	1515.75	3	3.4686	83.5405
	A0A060XII9;A0A060XJX9	0.110432	1.01947	LGVLTEEKESLLELWEVRR		44.25	767.096	2298.27	3	3.31325	174.662
	A0A060XII9;A0A060XJX9	175.073	0.137542	LKDLNGQADSLTASTAFDPTQVK		42.97	807.417	2419.23	3	3.52823	92.9938
	A0A060XII9;A0A0R4IJ08;A0A0S7GKE8;A0A0S7GKV9;A0A0S7GMT1;A0A0S7GPJ4;A0A0S7GQA6;A0A0S7GRJ6;A0A1A7WGD9;A0A1A7Z4A6;A0A1A8D2Q6;A0A1A8D8C3;A0A1A8GCR2;A0A1A8I584;A0A1A8KR84;A0A1A8MAY9;A0A1A8QC83;A0A1A8SFC1;A0A1A8UI02;A0A087XQU7;A0A146Q523;A0A146Z4H1;A0A146Z4K2;A0A146Z4L3;A0A146Z4P1;A0A146Z5L2;A0A146Z6F5;F1R443;F1R446;H2MBY2;H2UIA9;H2UIB0;H2UIB1;H3C0G3;H3CBT9;M4A8R0;Q4T9R4;Q4T9R5;Q566W8;W5KTF3;W5KTG2;W5MF…	1.85005	1.01947	LWDLLLQK		39.08	514.813	1027.61	2	0.50593	123.824
	A0A060XII9;A0A060XJX9	505.965	0.488763	RLEAELGAHEPAIQSVQDTGKK		38.63	476.255	2376.24	5	-0.745109	65.4472
	A0A060XII9;A0A0D9SGF6;A0A0P7V2T7;A0A0P7VEP4;A0A0R4IJ08;A0A0S7GFS1;A0A0S7GFS2;A0A0S7GFS3;A0A0S7GG64;A0A0S7GGW2;A0A0S7GGW7;A0A0S7GI92;A0A0S7GKU3;A0A0S7GLM7;A0A0S7GLW5;A0A087XQU7;A0A146NIL5;A0A146NIU7;A0A146NJR6;A0A146Q523;A0A146Z4J7;A0A146Z4K2;A0A146Z4L3;A0A146Z4P1;A0A146Z6F5;A0A146Z650;C0PUV6;F1R443;F1R446;G3Q393;G3Q398;H2MBY2;H2UGD2;H2UIA9;H2UIB0;H2UIB1;H3C0G3;H3CBT9;I3JZ89;I3JZ90;M4A8R0;Q4T9R4;Q…	1.20725	0.827429	ENSLKTDDYGR		38.31	433.213	1296.62	3	19.998	19.9438
	A0A060XII9;A0A0D9SGF6;A0A0P7V2T7;A0A0P7VEP4;A0A0R4IJ08;A0A0S7GFQ8;A0A0S7GFR3;A0A0S7GFS1;A0A0S7GFS2;A0A0S7GFS3;A0A0S7GFT9;A0A0S7GG64;A0A0S7GGW2;A0A0S7GGW7;A0A0S7GKU3;A0A0S7GLM7;A0A0S7GNH5;A0A1A7WGD9;A0A1A7Z4A6;A0A1A8AIC9;A0A1A8DRB6;A0A1A8GCR2;A0A1A8KF62;A0A1A8MAY9;A0A1A8MXE6;A0A1A8QNY9;A0A1A8RNY5;A0A1A8SFC1;A0A1A8UI02;A0A060XJX9;A0A087XQU7;A0A146NIL5;A0A146NIU7;A0A146NJR6;A0A146Q523;A0A146Z4H1;A0A…	1.03591	0.81451	LGESQTLQQFSR		37.01	465.242	1392.7	3	2.45396	58.6754
	A0A060XII9;A0A0D9SGF6;A0A0P7VEP4;A0A0R4IJ08;A0A0S7GFS1;A0A0S7GFS2;A0A0S7GFS3;A0A0S7GG64;A0A0S7GGW2;A0A0S7GGW7;A0A0S7GI92;A0A0S7GKU3;A0A0S7GLM7;A0A0S7GLW5;A0A1A7WGD9;A0A1A7Z4A6;A0A1A8AIC9;A0A1A8DRB6;A0A1A8GCR2;A0A1A8KF62;A0A1A8MAY9;A0A1A8MXE6;A0A1A8QNY9;A0A1A8RNY5;A0A1A8SFC1;A0A1A8UI02;A0A060XJX9;A0A087XQU7;A0A146NIL5;A0A146NIU7;A0A146NJR6;A0A146Q523;A0A146Z4J7;A0A146Z4K2;A0A146Z4L3;A0A146Z4P1;A0A…	1.53291	0.988724	KVEDLFLTFAK		36.93	655.857	1309.7	2	-23.1591	119.386
	A0A060XII9;A0A0D9SGF6;A0A0P7V2T7;A0A0P7VEP4;A0A0R4IJ08;A0A0S7GFR3;A0A0S7GFS2;A0A0S7GG64;A0A0S7GKU3;A0A0S7GLM7;A0A1A7WGD9;A0A1A7Z4A6;A0A1A8D2Q6;A0A1A8GCR2;A0A1A8I584;A0A1A8KR84;A0A1A8MAY9;A0A1A8SFC1;A0A060XJX9;A0A087XQU7;A0A146NIL5;A0A146NIU7;A0A146NJR6;A0A146Q523;A0A146Z4H1;A0A146Z4J7;A0A146Z4L3;A0A146Z4P1;A0A146Z5L2;A0A146Z6F5;A0A146Z650;F1R443;F1R446;G3Q393;G3Q398;H2MBY2;H2UIA9;H2UIB0;H2UIB1;H3…	1.12398	1.23248	GKDLIGVQNLLKK		36.53	357.226	1424.87	4	2.74437	80.7888
	A0A060XII9;A0A060XJX9	1.07324	0.959841	LEALDHERADLEK		35.73	513.6	1537.78	3	4.7359	40.5674
	A0A060XII9	1.23355	1.09119	SLVSSEELAK		35.63	531.791	1061.57	2	7.1833	42.4141
	A0A060XII9	1.68781	213.939	ATDEAGQALLNTGHYALEEVKEK		33.5	622.567	2486.24	4	3.23348	107.674
	A0A060XII9;A0A0D9SGF6;A0A0P7V2T7;A0A0P7VEP4;A0A0R4IJ08;A0A0S7GFQ8;A0A0S7GFR3;A0A0S7GFS1;A0A0S7GFS2;A0A0S7GFS3;A0A0S7GFT9;A0A0S7GG64;A0A0S7GGW2;A0A0S7GGW7;A0A0S7GKU3;A0A0S7GLM7;A0A0S7GNH5;A0A1A7WGD9;A0A1A7Z4A6;A0A1A8AIC9;A0A1A8DRB6;A0A1A8GCR2;A0A1A8KF62;A0A1A8MAY9;A0A1A8MXE6;A0A1A8QNY9;A0A1A8RNY5;A0A1A8SFC1;A0A1A8UI02;A0A060XJX9;A0A087XQU7;A0A146NIL5;A0A146NIU7;A0A146NJR6;A0A146Q523;A0A146Z4H1;A0A…	1.03818	173.829	KHEDFDKAINVQEEK		32.61	458.234	1828.91	4	4.44861	30.8362
	A0A060XII9	0.957142	1.10304	QFQEAGHFDGDNIKR		32.03	441.216	1760.83	4	8.1748	39.9221
A0A060XJX9	128	1.36399	1.01947	128
	A0A060XJX9;A0A0D9SGF6;A0A0R4IJ08;A0A0S7GFR3;A0A0S7GFS1;A0A0S7GFS2;A0A0S7GFS3;A0A0S7GG64;A0A0S7GGW2;A0A0S7GGW7;A0A0S7GKU3;A0A0S7GLM7;A0A0S7GNH5;A0A1A7WGD9;A0A1A7Z4A6;A0A1A8GCR2;A0A1A8MAY9;A0A1A8MXE6;A0A1A8QNY9;A0A1A8RNY5;A0A1A8SFC1;A0A060XII9;A0A087XQU7;A0A146NIL5;A0A146NIU7;A0A146NJR6;A0A146Q523;A0A146Z4H1;A0A146Z4J7;A0A146Z4K2;A0A146Z4L3;A0A146Z4P1;A0A146Z5L2;A0A146Z6F5;A0A146Z650;F1QDX2;F1R443;…	1.10634	0.946459	NQALNTDNYGHDLASVQALQR		127.8	776.717	2327.13	3	-0.924291	82.1301
	A0A060XJX9;A0A060XII9;W5KTF3;W5KTG2	1.36575	1.12044	DLAALEDKVNTLGGEAER		127.25	950.985	1899.96	2	3.09066	100.048
	A0A060XJX9;A0A0D9SGF6;A0A060XII9;C0PUV6;Q13813;W5MFM2;W5MFP4	1.44255	1.06817	SSLSSAQADFNQLAELDR		124.15	976.474	1950.93	2	1.7385	116.843
	A0A060XJX9;A0A0P7VEP4;A0A0S7GFQ8;A0A0S7GFR3;A0A0S7GFS1;A0A0S7GFS2;A0A0S7GFS3;A0A0S7GFT9;A0A0S7GG64;A0A0S7GGW2;A0A0S7GGW7;A0A0S7GKU3;A0A0S7GLM7;A0A0S7GNH5;A0A1A7WGD9;A0A1A7Z4A6;A0A1A8AIC9;A0A1A8DRB6;A0A1A8GCR2;A0A1A8KF62;A0A1A8MAY9;A0A1A8MXE6;A0A1A8QNY9;A0A1A8RNY5;A0A1A8SFC1;A0A1A8UI02;A0A060XII9;A0A087XQU7;I3JZ89;I3JZ90;M4A8R0;W5KTF3;W5KTG2	0.0290227	34.4391	AGTFQAFEQFGQQLLAR		122.22	956.489	1910.96	2	1.61374	169.873
	A0A060XJX9	582.864	0.243455	LSDDNTIGQDEIEQR		118.14	866.908	1731.8	2	6.83845	47.7734
	A0A060XJX9;A0A0P7V2T7;A0A0S7GFR3;A0A0S7GFS1;A0A0S7GFS2;A0A0S7GFS3;A0A0S7GG64;A0A0S7GGW2;A0A0S7GGW7;A0A0S7GKU3;A0A0S7GLM7;A0A0S7GNH5;A0A1A7WGD9;A0A1A7Z4A6;A0A1A8AIC9;A0A1A8DRB6;A0A1A8GCR2;A0A1A8KF62;A0A1A8MAY9;A0A1A8MXE6;A0A1A8QNY9;A0A1A8RNY5;A0A1A8SFC1;A0A1A8UI02;A0A087XQU7;A0A146NIL5;A0A146NIU7;A0A146NJR6;A0A146Q523;A0A146Z4H1;A0A146Z4J7;A0A146Z4K2;A0A146Z4L3;A0A146Z4P1;A0A146Z5L2;A0A146Z6F5;A0A…	0.000970093	0.480679	GLVSSEELAKDVTGAEALLER		115.99	729.722	2186.15	3	2.34333	162.693
	A0A060XJX9;A0A0R4IJ08;A0A0S7GFS1;A0A0S7GFS2;A0A0S7GFS3;A0A0S7GG64;A0A0S7GGW2;A0A0S7GGW7;A0A0S7GI92;A0A0S7GKU3;A0A0S7GLM7;A0A0S7GLW5;A0A1A7WGD9;A0A1A7Z4A6;A0A1A8AIC9;A0A1A8DRB6;A0A1A8GCR2;A0A1A8KF62;A0A1A8MAY9;A0A1A8MXE6;A0A1A8QNY9;A0A1A8RNY5;A0A1A8SFC1;A0A1A8UI02;A0A060XII9;A0A087XQU7;A0A146NIL5;A0A146NIU7;A0A146NJR6;A0A146Q523;A0A146Z4J7;A0A146Z4K2;A0A146Z4L3;A0A146Z4P1;A0A146Z6F5;A0A146Z650;F1R…	1.12788	1556.08	LNLVGSEDYGDTLAAVQGLLK		115.77	726.054	2175.14	3	0.603017	171.724
	A0A060XJX9;A0A060XII9;G3Q393;G3Q398;H2UIA9;H2UIB0;H2UIB1;I3JZ89;I3JZ90	1.50932	0.826446	LGALDEQWQFLVNK		110.33	830.941	1659.87	2	3.97313	140.23
	A0A060XJX9;A0A0R4IJ08;A0A0S7GFS1;A0A0S7GFS2;A0A0S7GFS3;A0A0S7GG64;A0A0S7GGW2;A0A0S7GGW7;A0A0S7GI92;A0A0S7GKU3;A0A0S7GLM7;A0A0S7GLW5;A0A1A7WGD9;A0A1A7Z4A6;A0A1A8AIC9;A0A1A8DRB6;A0A1A8GCR2;A0A1A8KF62;A0A1A8MAY9;A0A1A8MXE6;A0A1A8QNY9;A0A1A8RNY5;A0A1A8SFC1;A0A1A8UI02;A0A060XII9;A0A087XQU7;A0A146NIL5;A0A146NIU7;A0A146NJR6;A0A146Q523;A0A146Z4J7;A0A146Z4K2;A0A146Z4L3;A0A146Z4P1;A0A146Z6F5;A0A146Z650;F1R…	16.1158	1.01947	LNLVGSEDYGDTLAAVQGLLK		109.97	1088.58	2175.15	2	6.71343	175.929
	A0A060XJX9;A0A0D9SGF6;A0A0P7V2T7;A0A0P7VEP4;A0A0R4IJ08;A0A0S7GFS1;A0A0S7GFS2;A0A0S7GFS3;A0A0S7GG64;A0A0S7GGW2;A0A0S7GGW7;A0A0S7GI92;A0A0S7GKU3;A0A0S7GLM7;A0A0S7GLW5;A0A1A7WGD9;A0A1A7Z4A6;A0A1A8AIC9;A0A1A8DRB6;A0A1A8GCR2;A0A1A8KF62;A0A1A8MAY9;A0A1A8MXE6;A0A1A8QNY9;A0A1A8RNY5;A0A1A8SFC1;A0A1A8UI02;A0A1B0GV13;A0A060XII9;A0A087XQU7;A0A146NIL5;A0A146NIU7;A0A146NJR6;A0A146Q523;A0A146Z4J7;A0A146Z4K2;A0A…	1.62303	0.582025	LDENSAFLQFNWK		109.63	806.398	1610.78	2	7.24726	133.8
	A0A060XJX9;A0A0R4IJ08;A0A060XII9;F1QDX2;F1R443;F1R446;H2UIB1;H3CBT9;I3JZ89;I3JZ90;Q4T9R4;Q4T9R5	1.59564	1.6447	LAVQTTANFNTIK		107.46	710.894	1419.77	2	3.10611	73.2969
	A0A060XJX9;A0A0P7V2T7;A0A0P7VEP4;A0A0R4IJ08;A0A0S7GKE8;A0A0S7GMT1;A0A0S7GQA6;A0A1A7WGD9;A0A1A7Z4A6;A0A1A8D2Q6;A0A1A8D8C3;A0A1A8GCR2;A0A1A8I584;A0A1A8KR84;A0A1A8MAY9;A0A1A8QC83;A0A1A8SFC1;A0A1A8UI02;A0A060XII9;A0A087XQU7;A0A146Q523;A0A146Z4H1;A0A146Z4K2;A0A146Z4L3;A0A146Z4P1;A0A146Z5L2;A0A146Z6F5;A0A146Z650;F1R443;F1R446;G3Q393;G3Q398;H2MBY2;I3JZ89;I3JZ90;M4A8R0;Q566W8;W5KTF3;W5KTG2;W5MFM2;W5MFP4	3.19093	1.85266	ALINADELANDVAGAEALLDR		107	718.709	2153.11	3	2.54416	185.541
	A0A060XJX9;A0A0D9SGF6;A0A0P7V2T7;A0A0P7VEP4;A0A0R4IJ08;A0A0S7GFS2;A0A0S7GFS3;A0A0S7GGW7;A0A0S7GI92;A0A0S7GKU3;A0A1A7WGD9;A0A1A7Z4A6;A0A1A8AIC9;A0A1A8DRB6;A0A1A8GCR2;A0A1A8KF62;A0A1A8MAY9;A0A1A8MXE6;A0A1A8QNY9;A0A1A8RNY5;A0A1A8SFC1;A0A1A8UI02;A0A060XII9;A0A087XQU7;A0A146NIU7;A0A146Q523;A0A146Z4J7;A0A146Z4L3;A0A146Z4P1;A0A146Z6F5;A0A146Z650;C0PUV6;F1R443;F1R445;F1R446;F8K8N3;G3Q393;G3Q398;H2MBY2;H2…	2.21306	2.37499	IEDLGAAMEEALILDNK		106.2	922.972	1843.93	2	5.60561	153.845
	A0A060XJX9;A0A1A7WGD9;A0A1A7Z4A6;A0A1A8D2Q6;A0A1A8GCR2;A0A1A8I584;A0A1A8KR84;A0A1A8MXE6;A0A1A8QNY9;A0A1A8SFC1;A0A060XII9;W5KTF3;W5KTG2	1042.5	684.201	EGALTNEEVGSDLEQVEVLQK		105.35	1144.07	2286.13	2	4.00149	109.237
	A0A060XJX9	1.00321	0.687676	GACSGSEDAVQSR	[3] Methylthio (C)	105.05	656.766	1311.52	2	-1.92646	23.4913
	A0A060XJX9;A0A060XII9	0.0817648	0.709318	VLESADDIQER		103.48	637.815	1273.61	2	3.74829	30.9067
	A0A060XJX9;A0A060XII9;C0PUV6	235.68	1.01947	NTTGVTEDALKEFSMMFK		99.73	683.664	2047.97	3	4.49332	170.729
	A0A060XJX9;A0A0D9SGF6;A0A0P7V2T7;A0A0P7VEP4;A0A0R4IJ08;A0A0S7GFS2;A0A0S7GFS3;A0A0S7GGW7;A0A0S7GI92;A0A0S7GKU3;A0A1A7WGD9;A0A1A7Z4A6;A0A1A8AIC9;A0A1A8DRB6;A0A1A8GCR2;A0A1A8KF62;A0A1A8MAY9;A0A1A8MXE6;A0A1A8QNY9;A0A1A8RNY5;A0A1A8SFC1;A0A1A8UI02;A0A060XII9;A0A087XQU7;A0A146NIU7;A0A146Q523;A0A146Z4J7;A0A146Z4L3;A0A146Z4P1;A0A146Z6F5;A0A146Z650;C0PUV6;F1R443;F1R445;F1R446;F8K8N3;G3Q393;G3Q398;H2MBY2;H2…	12.4474	0.768997	KIEDLGAAMEEALILDNK		99.23	658.351	1972.03	3	5.84731	152.693
	A0A060XJX9;A0A0D9SGF6;A0A0P7V2T7;A0A0P7VEP4;A0A0R4IJ08;A0A0S7GFR3;A0A0S7GFS2;A0A0S7GG64;A0A0S7GKU3;A0A0S7GLM7;A0A1A7WGD9;A0A1A7Z4A6;A0A1A8D2Q6;A0A1A8GCR2;A0A1A8I584;A0A1A8KR84;A0A1A8MXE6;A0A1A8QNY9;A0A1A8SFC1;A0A060XII9;A0A146NIL5;A0A146NIU7;A0A146NJR6;A0A146Q523;A0A146Z4H1;A0A146Z4J7;A0A146Z4K2;A0A146Z4L3;A0A146Z4P1;A0A146Z5L2;A0A146Z6F5;A0A146Z650;F1R443;F1R446;G3Q393;G3Q398;H2UIB0;H2UIB1;H3CBT…	1.03818	2427.31	QQVAPTDDETGKELVLALYDYQEK		96.33	918.458	2752.35	3	4.07101	131.026
	A0A060XJX9;A0A0D9SGF6;A0A0P7V2T7;A0A0R4IJ08;A0A0S7GFR3;A0A0S7GFS2;A0A0S7GG64;A0A0S7GKU3;A0A0S7GLM7;A0A1A7WGD9;A0A1A7Z4A6;A0A1A8D2Q6;A0A1A8D8C3;A0A1A8GCR2;A0A1A8I584;A0A1A8KR84;A0A1A8MAY9;A0A1A8RNY5;A0A1A8SFC1;A0A060XII9;A0A087XQU7;F1R443;F1R446;G3Q393;G3Q398;H2MBY2;I3JZ89;I3JZ90;M4A8R0;Q13813;W5KTF3;W5KTG2;W5MFM2;W5MFP4	1.03818	1.24516	RQDLEDSLQAQQYFADANEAESWMR		95.41	1001.12	3000.34	3	4.19052	134.37
	A0A060XJX9;A0A0D9SGF6;A0A060XII9;C0PUV6;Q13813;W5MFM2;W5MFP4	1.38434	1.09069	SSLSSAQADFNQLAELDR		93.6	651.318	1950.93	3	1.4648	116.843
	A0A060XJX9;A0A060XII9	0.411037	0.494178	LGVLTEEKESLLELWEVR		92.83	715.063	2142.17	3	2.77338	189.504
	A0A060XJX9;A0A0P7VEP4;A0A0S7GFQ8;A0A0S7GFR3;A0A0S7GFS1;A0A0S7GFS2;A0A0S7GFS3;A0A0S7GFT9;A0A0S7GG64;A0A0S7GGW2;A0A0S7GGW7;A0A0S7GKU3;A0A0S7GLM7;A0A0S7GNH5;A0A1A7WGD9;A0A1A7Z4A6;A0A1A8AIC9;A0A1A8DRB6;A0A1A8GCR2;A0A1A8KF62;A0A1A8MAY9;A0A1A8MXE6;A0A1A8QNY9;A0A1A8RNY5;A0A1A8SFC1;A0A1A8UI02;A0A060XII9;A0A087XQU7;I3JZ89;I3JZ90;M4A8R0;W5KTF3;W5KTG2	71.7992	2.98086	AGTFQAFEQFGQQLLAR		92.56	637.998	1910.97	3	6.14205	169.011
	A0A060XJX9;A0A0D9SGF6;A0A0P7V2T7;A0A0P7VEP4;A0A0R4IJ08;A0A1A7WGD9;A0A1A7Z4A6;A0A1A8D2Q6;A0A1A8D8C3;A0A1A8GCR2;A0A1A8I584;A0A1A8KR84;A0A1A8MAY9;A0A1A8QC83;A0A1A8SFC1;A0A1A8UI02;A0A060XII9;A0A087XQU7;A0A146Q523;A0A146Z4H1;A0A146Z4J7;A0A146Z4K2;A0A146Z4L3;A0A146Z4P1;A0A146Z5L2;A0A146Z6F5;A0A146Z650;F1R443;F1R446;G3Q393;G3Q398;H2MBY2;H2UIA9;H2UIB0;H2UIB1;H3C0G3;H3CBT9;I3JZ89;I3JZ90;M4A8R0;Q4T9R4;Q4T9…	1.02938	1.07542	HQAFEAELSANQSR		92.43	529.923	1586.75	3	4.18109	40.423
	A0A060XJX9;A0A0D9SFH4;A0A0D9SGF6;A0A0P7V2T7;A0A0P7VEP4;A0A0R4IJ08;A0A0S7GFS2;A0A0S7GFS3;A0A0S7GGW7;A0A0S7GI92;A0A0S7GKU3;A0A1A7WGD9;A0A1A7Z4A6;A0A1A8AIC9;A0A1A8DRB6;A0A1A8GCR2;A0A1A8KF62;A0A1A8MAY9;A0A1A8MXE6;A0A1A8QNY9;A0A1A8RNY5;A0A1A8SFC1;A0A1A8UI02;A0A060XII9;A0A087XQU7;A0A146NIU7;A0A146Q523;A0A146Z4J7;A0A146Z4L3;A0A146Z4P1;A0A146Z650;C0PUV6;F1R443;F1R445;F1R446;F8K8N3;G3Q393;G3Q398;H2MBY2;H2…	1.80805	0.865306	SSEEIESAFR		88.75	577.771	1153.53	2	-1.61916	51.3788
	A0A060XJX9;A0A0P7VEP4;A0A0R4IJ08;A0A0S7GFS1;A0A0S7GFS2;A0A0S7GFS3;A0A0S7GG64;A0A0S7GGW2;A0A0S7GGW7;A0A0S7GI92;A0A0S7GKU3;A0A0S7GLM7;A0A0S7GLW5;A0A1A7WGD9;A0A1A7Z4A6;A0A1A8AIC9;A0A1A8DRB6;A0A1A8GCR2;A0A1A8KF62;A0A1A8MAY9;A0A1A8MXE6;A0A1A8QNY9;A0A1A8RNY5;A0A1A8SFC1;A0A1A8UI02;A0A060XII9;A0A087XQU7;A0A146NIL5;A0A146NIU7;A0A146NJR6;A0A146Q523;A0A146Z4J7;A0A146Z4K2;A0A146Z4L3;A0A146Z4P1;A0A146Z6F5;A0A…	145.971	0.577478	QETFDAGLQAFQQEGITNITALK		88.67	841.766	2522.28	3	3.03161	153.268
	A0A060XJX9;A0A0R4IJ08;A0A060XII9;F1R443;F1R446;W5KTF3;W5KTG2	2.25083	1.26027	ENLLDEQGSIGLR		87.54	722.375	1442.74	2	-2.74321	85.0251
	A0A060XJX9;A0A0D9SGF6;A0A0P7VEP4;A0A0R4IJ08;A0A0S7GFS2;A0A0S7GFS3;A0A0S7GGW7;A0A0S7GI92;A0A0S7GKU3;A0A1A7WGD9;A0A1A7Z4A6;A0A1A8AIC9;A0A1A8DRB6;A0A1A8GCR2;A0A1A8KF62;A0A1A8MAY9;A0A1A8MXE6;A0A1A8QNY9;A0A1A8RNY5;A0A1A8SFC1;A0A1A8UI02;A0A060XII9;A0A087XQU7;A0A146NIU7;A0A146Q523;A0A146Z4J7;A0A146Z4L3;A0A146Z4P1;A0A146Z6F5;A0A146Z650;C0PUV6;F1R443;F1R445;F1R446;F8K8N3;G3Q393;G3Q398;H2MBY2;H2UGD2;H3C0G3…	0.233289	0.00119199	YTEHSTVGLAQQWDQLDQLGMR		87.43	859.415	2575.22	3	5.41344	132.586
	A0A060XJX9;A0A0D9SGF6;A0A0P7VEP4;A0A0R4IJ08;A0A060XII9;F1R443;F1R446;G3Q393;G3Q398;H2UIA9;H2UIB0;H2UIB1;H3C0G3;H3CBT9;I3JZ89;I3JZ90;Q4T9R4;Q4T9R5;Q566W8;Q13813;W5KTF3;W5KTG2;W5MFM2;W5MFP4	1.14844	0.843343	LFGAAEVQR		87	495.772	989.53	2	0.100762	47.4206
	A0A060XJX9;A0A0D9SGF6;A0A0P7V2T7;A0A0R4IJ08;A0A1A7WGD9;A0A1A7Z4A6;A0A1A8D2Q6;A0A1A8GCR2;A0A1A8I584;A0A1A8KR84;A0A1A8MXE6;A0A1A8QNY9;A0A1A8SFC1;A0A060XII9;F1R443;F1R446;G3Q393;G3Q398;Q13813;W5KTF3;W5KTG2	1.54542	1.00188	EANELQQWINEK		84.85	751.369	1500.72	2	1.77925	86.718
	A0A060XJX9;A0A0D9SGF6;A0A0P7VEP4;A0A0R4IJ08;A0A0S7GFQ8;A0A0S7GFR3;A0A0S7GFS1;A0A0S7GFS2;A0A0S7GFS3;A0A0S7GFT9;A0A0S7GG64;A0A0S7GGW2;A0A0S7GGW7;A0A0S7GKU3;A0A0S7GLM7;A0A0S7GNH5;A0A1A7WGD9;A0A1A7Z4A6;A0A1A8AIC9;A0A1A8DRB6;A0A1A8GCR2;A0A1A8KF62;A0A1A8MAY9;A0A1A8MXE6;A0A1A8QNY9;A0A1A8RNY5;A0A1A8SFC1;A0A1A8UI02;A0A060XII9;A0A087XQU7;A0A146NIL5;A0A146NIU7;A0A146NJR6;A0A146Q523;A0A146Z4H1;A0A146Z4J7;A0A…	639.152	1.0256	DCEQAENWMAAR	[2] Methylthio (C)	84.18	735.286	1468.56	2	4.578	79.8609
	A0A060XJX9;A0A0R4IJ08;A0A0S7GFR3;A0A0S7GFS2;A0A0S7GG64;A0A0S7GKU3;A0A0S7GLM7;A0A1A7WGD9;A0A1A7Z4A6;A0A1A8D2Q6;A0A1A8D8C3;A0A1A8GCR2;A0A1A8I584;A0A1A8KR84;A0A1A8QNY9;A0A1A8SFC1;A0A060XII9;A0A087XQU7;A0A146NIL5;A0A146NIU7;A0A146NJR6;A0A146Q523;A0A146Z4H1;A0A146Z4J7;A0A146Z4K2;A0A146Z4L3;A0A146Z4P1;A0A146Z5L2;A0A146Z6F5;A0A146Z650;F1R443;F1R446;H2UIA9;H2UIB0;H2UIB1;M4A8R0;W5KTF3;W5KTG2	1.21813	0.849124	EKEPIVGSPDYGKDEDSAEALLK		83.57	623.313	2489.22	4	0.933673	82.5533
	A0A060XJX9;A0A0D9SGF6;A0A0P7V2T7;A0A0R4IJ08;A0A0S7GFR3;A0A0S7GFS1;A0A0S7GFS2;A0A0S7GFS3;A0A0S7GG64;A0A0S7GGW2;A0A0S7GGW7;A0A0S7GKU3;A0A0S7GLM7;A0A0S7GNH5;A0A1A7WGD9;A0A1A7Z4A6;A0A1A8AIC9;A0A1A8DRB6;A0A1A8GCR2;A0A1A8MAY9;A0A1A8MXE6;A0A1A8QNY9;A0A1A8RNY5;A0A1A8SFC1;A0A1A8UI02;A0A060XII9;A0A087XQU7;A0A146NIL5;A0A146NIU7;A0A146NJR6;A0A146Q523;A0A146Z4H1;A0A146Z4J7;A0A146Z4K2;A0A146Z4L3;A0A146Z4P1;A0A…	342.749	49.8991	DADETKEWIEEK		83.48	746.846	1491.68	2	5.32486	44.8114
	A0A060XJX9;A0A0D9SGF6;A0A0P7V2T7;A0A0P7VEP4;A0A0R4IJ08;A0A0S7GFQ8;A0A0S7GFR3;A0A0S7GFS1;A0A0S7GFS2;A0A0S7GFS3;A0A0S7GFT9;A0A0S7GG64;A0A0S7GGW2;A0A0S7GGW7;A0A0S7GKU3;A0A0S7GLM7;A0A0S7GNH5;A0A1A7WGD9;A0A1A7Z4A6;A0A1A8AIC9;A0A1A8DRB6;A0A1A8GCR2;A0A1A8KF62;A0A1A8MAY9;A0A1A8MXE6;A0A1A8QNY9;A0A1A8RNY5;A0A1A8SFC1;A0A1A8UI02;A0A060XII9;A0A087XQU7;A0A146NIL5;A0A146NIU7;A0A146NJR6;A0A146Q523;A0A146Z4H1;A0A…	1.58256	1.52869	DVTGAEALLER		82.72	587.31	1172.6	2	3.83635	77.9559
	A0A060XJX9;A0A0D9SGF6;A0A0P7V2T7;A0A0P7VEP4;A0A0R4IJ08;A0A1A7WGD9;A0A1A7Z4A6;A0A1A8D2Q6;A0A1A8D8C3;A0A1A8GCR2;A0A1A8I584;A0A1A8KR84;A0A1A8MAY9;A0A1A8QC83;A0A1A8SFC1;A0A1A8UI02;A0A060XII9;A0A087XQU7;A0A146Q523;A0A146Z4H1;A0A146Z4J7;A0A146Z4K2;A0A146Z4L3;A0A146Z4P1;A0A146Z5L2;A0A146Z6F5;A0A146Z650;F1R443;F1R446;G3Q393;G3Q398;H2MBY2;H2UIA9;H2UIB0;H2UIB1;H3C0G3;H3CBT9;I3JZ89;I3JZ90;M4A8R0;Q4T9R4;Q4T9…	1.36222	1.05396	HQAFEAELSANQSR		82.34	794.38	1586.75	2	3.32603	40.4952
	A0A060XJX9;A0A0D9SGF6;A0A0P7V2T7;A0A0P7VEP4;A0A0R4IJ08;A0A0S7GKE8;A0A0S7GMT1;A0A0S7GQA6;A0A1A7WGD9;A0A1A7Z4A6;A0A1A8D2Q6;A0A1A8D8C3;A0A1A8GCR2;A0A1A8I584;A0A1A8KR84;A0A1A8MAY9;A0A1A8QC83;A0A1A8SFC1;A0A1A8UI02;A0A060XII9;A0A087XQU7;A0A146Q523;A0A146Z4H1;A0A146Z4K2;A0A146Z4L3;A0A146Z4P1;A0A146Z5L2;A0A146Z6F5;F1R443;F1R446;G3Q393;G3Q398;H2MBY2;H2UIA9;H2UIB0;H2UIB1;H3C0G3;H3CBT9;I3JZ89;I3JZ90;M4A8R0;…	13.9598	12.7181	DLASVQALLR		82.27	543.319	1084.62	2	4.01573	111.985
	A0A060XJX9;A0A0R4IJ08;A0A0S7GFS1;A0A0S7GFS2;A0A0S7GFS3;A0A0S7GG64;A0A0S7GGW2;A0A0S7GGW7;A0A0S7GI92;A0A0S7GKU3;A0A0S7GLM7;A0A0S7GLW5;A0A1A7WGD9;A0A1A7Z4A6;A0A1A8AIC9;A0A1A8DRB6;A0A1A8GCR2;A0A1A8KF62;A0A1A8MAY9;A0A1A8MXE6;A0A1A8QNY9;A0A1A8RNY5;A0A1A8SFC1;A0A1A8UI02;A0A060XII9;A0A087XQU7;A0A146NIL5;A0A146NIU7;A0A146NJR6;A0A146Q523;A0A146Z4J7;A0A146Z4L3;A0A146Z4P1;A0A146Z6F5;A0A146Z650;C0PUV6;F1R443;…	0.00243808	1.43642	QETFDAGLQAFQQEGITNITALKDQLLAAK		81.55	1088.24	3261.69	3	0.395662	190.428
	A0A060XJX9;A0A0R4IJ08;A0A0S7GKE8;A0A0S7GKV9;A0A0S7GQU7;A0A1A8D2Q6;A0A1A8D8C3;A0A1A8GCR2;A0A1A8I584;A0A1A8KR84;A0A1A8MAY9;A0A1A8QC83;A0A1A8SFC1;A0A1A8UI02;A0A060XII9;A0A087XQU7;A0A146Z4H1;A0A146Z4K2;A0A146Z4L3;A0A146Z4P1;A0A146Z5L2;A0A146Z6F5;F1R443;F1R446;G3Q393;G3Q398;H2MBY2;I3JZ89;I3JZ90;M4A8R0;Q32P38;Q566W8;W5KTF3;W5KTG2;W5MFM2;W5MFP4	3.59038	0.31157	DADELEKWIQEK		80.79	752.37	1502.73	2	-2.72521	95.8845
	A0A060XJX9;A0A0D9SGF6;A0A0P7V2T7;A0A0P7VEP4;A0A0R4IJ08;A0A0S7GFS1;A0A0S7GFS2;A0A0S7GFS3;A0A0S7GG64;A0A0S7GGW2;A0A0S7GGW7;A0A0S7GI92;A0A0S7GKU3;A0A0S7GLM7;A0A0S7GLW5;A0A1A7WGD9;A0A1A7Z4A6;A0A1A8AIC9;A0A1A8DRB6;A0A1A8GCR2;A0A1A8KF62;A0A1A8MAY9;A0A1A8MXE6;A0A1A8QNY9;A0A1A8RNY5;A0A1A8SFC1;A0A1A8UI02;A0A060XII9;A0A087XQU7;A0A146NIL5;A0A146NIU7;A0A146NJR6;A0A146Q523;A0A146Z4J7;A0A146Z4K2;A0A146Z4L3;A0A…	3.42187	0.776863	ADVVESWIGEK		80.45	616.814	1231.61	2	3.30561	81.7777
	A0A060XJX9;A0A0S7GFS2;A0A0S7GFS3;A0A0S7GGW7;A0A0S7GI92;A0A0S7GKU3;A0A1A7WGD9;A0A1A7Z4A6;A0A1A8AIC9;A0A1A8DRB6;A0A1A8GCR2;A0A1A8KF62;A0A1A8MAY9;A0A1A8MXE6;A0A1A8QNY9;A0A1A8RNY5;A0A1A8SFC1;A0A1A8UI02;A0A060XII9;A0A146NIU7;A0A146Q523;A0A146Z4J7;A0A146Z4L3;A0A146Z4P1;A0A146Z6F5;A0A146Z650;C0PUV6;F1R446;G3Q393;G3Q398;H2MBY2;H3C0G3;H3CBT9;I3JZ89;Q13813;W5KTG2;W5MFM2	3.63141	5.60988	TYLLDGSCMVEESGTLESQLEATKR	[8] Methylthio (C)	79.79	936.109	2805.3	3	4.90607	152.98
	A0A060XJX9;A0A0D9SGF6;A0A0P7V2T7;A0A0P7VEP4;A0A0R4IJ08;A0A0S7GKE8;A0A0S7GMT1;A0A0S7GQA6;A0A1A7WGD9;A0A1A7Z4A6;A0A1A8D2Q6;A0A1A8D8C3;A0A1A8GCR2;A0A1A8I584;A0A1A8KR84;A0A1A8MAY9;A0A1A8QC83;A0A1A8SFC1;A0A1A8UI02;A0A060XII9;A0A087XQU7;A0A146Q523;A0A146Z4H1;A0A146Z4K2;A0A146Z4L3;A0A146Z4P1;A0A146Z5L2;A0A146Z6F5;A0A146Z650;F1R443;F1R446;G3Q393;G3Q398;H2MBY2;H2UIA9;H2UIB0;H2UIB1;H3C0G3;H3CBT9;I3JZ89;I3J…	4.51153	0.892071	DTEQVDNWMSK		79.45	676.796	1351.58	2	5.05027	55.3468
	A0A060XJX9;A0A1A7WGD9;A0A1A7Z4A6;A0A1A8D2Q6;A0A1A8GCR2;A0A1A8I584;A0A1A8KR84;A0A1A8MXE6;A0A1A8QNY9;A0A1A8SFC1;A0A060XII9;W5KTF3;W5KTG2	4.24954	2.61477	EGALTNEEVGSDLEQVEVLQK		79.15	763.052	2286.13	3	6.33243	109.237
	A0A060XJX9;A0A0R4IJ08;A0A0S7GFS1;A0A0S7GFS2;A0A0S7GFS3;A0A0S7GG64;A0A0S7GGW2;A0A0S7GGW7;A0A0S7GI92;A0A0S7GKU3;A0A0S7GLM7;A0A0S7GLW5;A0A1A7WGD9;A0A1A7Z4A6;A0A1A8AIC9;A0A1A8DRB6;A0A1A8GCR2;A0A1A8KF62;A0A1A8MAY9;A0A1A8MXE6;A0A1A8QNY9;A0A1A8RNY5;A0A1A8SFC1;A0A1A8UI02;A0A060XII9;A0A087XQU7;A0A146NIL5;A0A146NIU7;A0A146NJR6;A0A146Q523;A0A146Z4J7;A0A146Z4L3;A0A146Z4P1;A0A146Z6F5;A0A146Z650;C0PUV6;F1R443;…	1158.65	1.01947	QETFDAGLQAFQQEGITNITALKDQLLAAK		78.96	816.434	3261.71	4	4.85996	190.921
	A0A060XJX9;A0A0R4IJ08;A0A0S7GFS1;A0A0S7GFS2;A0A0S7GFS3;A0A0S7GG64;A0A0S7GGW2;A0A0S7GGW7;A0A0S7GI92;A0A0S7GKU3;A0A0S7GLM7;A0A0S7GLW5;A0A1A7WGD9;A0A1A7Z4A6;A0A1A8AIC9;A0A1A8DRB6;A0A1A8GCR2;A0A1A8KF62;A0A1A8MAY9;A0A1A8MXE6;A0A1A8QNY9;A0A1A8RNY5;A0A1A8SFC1;A0A1A8UI02;A0A060XII9;A0A087XQU7;A0A146NIL5;A0A146NIU7;A0A146NJR6;A0A146Q523;A0A146Z4J7;A0A146Z4L3;A0A146Z4P1;A0A146Z6F5;A0A146Z650;C0PUV6;F1R443;…	176.05	1.01947	QETFDAGLQAFQQEGITNITALKDQLLAAK	[N-term] Gln->pyro-Glu (N-term Q)	77.51	1082.57	3244.68	3	4.79505	192.126
	A0A060XJX9;A0A0R4IJ08;A0A0S7GFR3;A0A0S7GFS3;A0A0S7GG64;A0A0S7GGW2;A0A0S7GKU3;A0A0S7GNH5;A0A1A7WGD9;A0A1A7Z4A6;A0A1A8AIC9;A0A1A8DRB6;A0A1A8GCR2;A0A1A8KF62;A0A1A8MAY9;A0A1A8MXE6;A0A1A8QNY9;A0A1A8RNY5;A0A1A8SFC1;A0A1A8UI02;A0A060XII9;A0A087XQU7;A0A146NIL5;A0A146NIU7;A0A146NJR6;A0A146Z4H1;A0A146Z4P1;F1R446;G3Q398;H2MBY2;H2UIB0;I3JZ89;M4A8R0;W5KTF3;W5KTG2;W5MFM2;W5MFP4	1.81363	0.890157	LQTATDESYKDPTNIQLSK		77.03	718.032	2151.07	3	1.28737	63.1219
	A0A060XJX9;A0A0D9SGF6;A0A0P7V2T7;A0A0P7VEP4;A0A0R4IJ08;A0A0S7GFS1;A0A0S7GFS2;A0A0S7GFS3;A0A0S7GG64;A0A0S7GGW2;A0A0S7GGW7;A0A0S7GI92;A0A0S7GKU3;A0A0S7GLM7;A0A0S7GLW5;A0A1A7WGD9;A0A1A7Z4A6;A0A1A8AIC9;A0A1A8DRB6;A0A1A8GCR2;A0A1A8KF62;A0A1A8MAY9;A0A1A8MXE6;A0A1A8QNY9;A0A1A8RNY5;A0A1A8SFC1;A0A1A8UI02;A0A060XII9;A0A087XQU7;A0A146NIL5;A0A146NIU7;A0A146NJR6;A0A146Q523;A0A146Z4J7;A0A146Z4K2;A0A146Z4L3;A0A…	1.51824	0.852764	DLSSVQTLLTK		76.54	602.844	1203.67	2	2.8522	99.131
	A0A060XJX9;A0A060XII9;W5KTF3;W5KTG2	1.11943	0.980359	DLAALEDKVNTLGGEAER		75.98	634.326	1899.95	3	2.5623	100.048
	A0A060XJX9;A0A0P7VEP4;A0A0R4IJ08;A0A0S7GKQ9;A0A0S7GMT1;A0A0S7GRJ6;A0A1A7WGD9;A0A1A7Z4A6;A0A1A8D2Q6;A0A1A8D8C3;A0A1A8GCR2;A0A1A8I584;A0A1A8KR84;A0A1A8MAY9;A0A1A8QC83;A0A1A8SFC1;A0A1A8UI02;A0A060XII9;A0A087XQU7;A0A146Q523;A0A146Z4H1;A0A146Z4K2;A0A146Z4L3;A0A146Z4P1;A0A146Z5L2;A0A146Z6F5;A0A146Z650;F1R443;F1R446;G3Q393;G3Q398;H2MBY2;H2UIA9;H2UIB0;H2UIB1;H3C0G3;H3CBT9;I3JZ89;I3JZ90;M4A8R0;Q4T9R4;Q4T9…	1.13379	1.01947	DSDELKSWINEK		75.04	732.356	1462.7	2	5.36109	70.5467
	A0A060XJX9;A0A0D9SFF6;A0A0D9SGF6;A0A0P7VEP4;A0A060XII9;Q13813;W5MFM2;W5MFP4	1.40401	0.731971	LQIASDENYKDPTNLQGK		74.98	678.678	2033.01	3	0.485343	60.3036
	A0A060XJX9;A0A0D9SGF6;A0A0P7V2T7;A0A0P7VEP4;A0A0R4IJ08;A0A0S7GFS1;A0A0S7GFS2;A0A0S7GFS3;A0A0S7GG64;A0A0S7GGW2;A0A0S7GGW7;A0A0S7GI92;A0A0S7GKU3;A0A0S7GLM7;A0A0S7GLW5;A0A1A7WGD9;A0A1A7Z4A6;A0A1A8AIC9;A0A1A8DRB6;A0A1A8GCR2;A0A1A8KF62;A0A1A8MAY9;A0A1A8MXE6;A0A1A8QNY9;A0A1A8RNY5;A0A1A8SFC1;A0A1A8UI02;A0A060XII9;A0A087XQU7;A0A146NIL5;A0A146NIU7;A0A146NJR6;A0A146Q523;A0A146Z4J7;A0A146Z4K2;A0A146Z4L3;A0A…	1.03818	0.845309	ASAFNSWFENAEEDLTDPVR		74.24	1149.52	2297.03	2	4.16893	161.833
	A0A060XJX9;A0A0D9SGF6;A0A0P7VEP4;A0A0R4IJ08;A0A0S7GKE8;A0A0S7GMT1;A0A0S7GQA6;A0A1A7WGD9;A0A1A7Z4A6;A0A1A8D2Q6;A0A1A8D8C3;A0A1A8GCR2;A0A1A8I584;A0A1A8KR84;A0A1A8MAY9;A0A1A8QC83;A0A1A8SFC1;A0A1A8UI02;A0A060XII9;A0A087XQU7;A0A146Q523;A0A146Z4H1;A0A146Z4K2;A0A146Z4L3;A0A146Z4P1;A0A146Z5L2;A0A146Z6F5;A0A146Z650;F1R443;F1R446;G3Q393;G3Q398;I3JZ89;I3JZ90;M4A8R0;Q566W8;Q13813;W5KTF3;W5KTG2;W5MFM2;W5MFP4	2.07143	0.191413	DLTSWVTEMK		73.73	605.296	1208.58	2	6.47796	114.66
	A0A060XJX9;A0A0D9SGF6;A0A0P7V2T7;A0A0R4IJ08;A0A146Q523;A0A146Z4H1;A0A146Z4J7;A0A146Z4K2;A0A146Z4L3;A0A146Z4P1;A0A146Z5L2;A0A146Z6F5;A0A146Z650;F1QDX2;F1R443;F1R446;G3Q393;G3Q398;H2MBY2;H3C0G3;H3CBT9;I3JZ89;I3JZ90;Q4T9R4;Q4T9R5;Q13813;W5KTF3;W5KTG2;W5MFM2;W5MFP4	1.34405	1.11579	DLAALGDKVNSLGETAER		73.23	620.321	1857.94	3	0.633634	86.0829
	A0A060XJX9;A0A0P7VEP4;A0A1A7Z4A6;A0A1A8D2Q6;A0A1A8D8C3;A0A1A8GCR2;A0A1A8I584;A0A1A8KR84;A0A1A8MAY9;A0A1A8QC83;A0A1A8SFC1;A0A1A8UI02;A0A060XII9;G3Q393;G3Q398;W5MFM2;W5MFP4	375.95	325.392	HQAFEAEVQANAGAIIK		72.73	599.649	1795.92	3	2.76581	83.9641
	A0A060XJX9;A0A060XII9;G3Q393;G3Q398;I3JZ89;I3JZ90;W5KTF3;W5KTG2	0.123332	250.724	SGQELLDGK		71.5	473.745	945.476	2	-3.85457	25.547
	A0A060XJX9	0.105836	0.985847	IAALQSFADQLVGADHYAKPEIFNR		71.15	694.366	2773.43	4	4.80459	162.048
	A0A060XJX9;A0A0R4IJ08;A0A0S7GFQ8;A0A0S7GFR3;A0A0S7GFS1;A0A0S7GFS2;A0A0S7GFS3;A0A0S7GFT9;A0A0S7GG64;A0A0S7GGW2;A0A0S7GGW7;A0A0S7GKU3;A0A0S7GLM7;A0A0S7GNH5;A0A1A7WGD9;A0A1A7Z4A6;A0A1A8AIC9;A0A1A8DRB6;A0A1A8GCR2;A0A1A8KF62;A0A1A8MAY9;A0A1A8MXE6;A0A1A8QNY9;A0A1A8RNY5;A0A1A8SFC1;A0A1A8UI02;A0A060XII9;A0A087XQU7;A0A146NIL5;A0A146NIU7;A0A146NJR6;A0A146Q523;A0A146Z4H1;A0A146Z4J7;A0A146Z4K2;A0A146Z4L3;A0A…	1.2166	0.487952	EAFLASDDKGDSLDSVEALIK		71.06	741.709	2222.11	3	2.41343	138.153
	A0A060XJX9;A0A0D9SGF6;A0A0P7V2T7;A0A0P7VEP4;A0A0R4IJ08;A0A0S7GFS2;A0A0S7GFS3;A0A0S7GGW7;A0A0S7GI92;A0A0S7GKU3;A0A1A7WGD9;A0A1A7Z4A6;A0A1A8AIC9;A0A1A8DRB6;A0A1A8GCR2;A0A1A8KF62;A0A1A8MAY9;A0A1A8MXE6;A0A1A8QNY9;A0A1A8RNY5;A0A1A8SFC1;A0A1A8UI02;A0A060XII9;A0A087XQU7;A0A146NIU7;A0A146Q523;A0A146Z4J7;A0A146Z4L3;A0A146Z4P1;A0A146Z6F5;A0A146Z650;C0PUV6;F1R443;F1R445;F1R446;F8K8N3;G3Q393;G3Q398;H2MBY2;H2…	748.413	24.6248	KIEDLGAAMEEALILDNK		70.83	987.022	1972.03	2	5.20131	152.693
	A0A060XJX9;A0A060XII9;C0PUV6	1.2127	2.58674	EMPSAFDFVEFTR	[2] Oxidation (M)	69.86	796.365	1590.71	2	9.25324	135.653
	A0A060XJX9;A0A0D9SGF6;A0A0P7V2T7;A0A0P7VEP4;A0A0R4IJ08;A0A0S7GFR3;A0A0S7GFS2;A0A0S7GG64;A0A0S7GKU3;A0A0S7GLM7;A0A1A7WGD9;A0A1A7Z4A6;A0A1A8D2Q6;A0A1A8GCR2;A0A1A8I584;A0A1A8KR84;A0A1A8MAY9;A0A1A8SFC1;A0A060XII9;A0A087XQU7;A0A146NIL5;A0A146NIU7;A0A146NJR6;A0A146Q523;A0A146Z4H1;A0A146Z4J7;A0A146Z4L3;A0A146Z4P1;A0A146Z5L2;A0A146Z6F5;A0A146Z650;F1R443;F1R446;G3Q393;G3Q398;H2MBY2;H2UIA9;H2UIB0;H2UIB1;H3…	0.646554	0.72502	GKDLIGVQNLLK		69.7	649.397	1296.78	2	-1.08841	96.0961
	A0A060XJX9;A0A060XII9;C0PUV6;G3Q393;G3Q398;H2UGD2	0.991535	1.2877	EELYQNLSK		69.51	562.289	1122.56	2	2.28799	40.4952
	A0A060XJX9;A0A0P7VEP4;A0A0R4IJ08;A0A060XII9;F1R443;F1R446;G3Q393;G3Q398;H2UIA9;H2UIB0;H2UIB1;H3C0G3;H3CBT9;I3JZ89;I3JZ90;Q4T9R4;W5KTF3;W5KTG2;W5MFM2;W5MFP4	0.109469	1.64738	LLVSSEDYGR		68.99	569.792	1137.57	2	-0.811243	46.0808
	A0A060XJX9;A0A060XII9	1.02968	0.87738	SGQELLDGKHYAADEVSVR		68.96	519.262	2073.02	4	4.37109	65.1653
	A0A060XJX9;A0A0D9SGF6;A0A060XII9;H2UIA9;H2UIB0;H2UIB1;I3JZ89;I3JZ90;Q13813;W5MFM2;W5MFP4	8.25228	4.76684	SLQQLAEER		68.42	537.284	1072.55	2	3.05578	41.9898
	A0A060XJX9;C0PUV6	1.08953	1.27694	WNQLLDNSQAR		68.36	672.837	1343.66	2	-0.824609	54.7798
	A0A060XJX9;A0A0P7VEP4;A0A060XII9;W5KTF3;W5KTG2;W5MFM2;W5MFP4	1.25631	0.999104	RDELITNWEQIR		68.21	786.911	1571.81	2	-1.88631	87.0717
	A0A060XJX9	1.03818	0.00337209	RAALEDSFHLQQFSR		67.8	602.312	1803.91	3	7.03232	83.0468
	A0A060XJX9;A0A0D9SGF6;A0A0P7VEP4;A0A0S7GFR3;A0A0S7GFS2;A0A0S7GG64;A0A0S7GKU3;A0A0S7GLM7;A0A060XII9;A0A146NIL5;A0A146NIU7;A0A146NJR6;A0A146Q523;A0A146Z4H1;A0A146Z4J7;A0A146Z4K2;A0A146Z4L3;A0A146Z4P1;A0A146Z5L2;A0A146Z6F5;A0A146Z650;Q13813;W5MFM2;W5MFP4	1.01436	1.1392	HQALQAEIAGHEPR		67.76	519.605	1555.79	3	1.33758	40.0654
	A0A060XJX9;A0A0R4IJ08;A0A0S7GFR3;A0A0S7GFS2;A0A0S7GG64;A0A0S7GKU3;A0A0S7GLM7;A0A1A7WGD9;A0A1A7Z4A6;A0A1A8D2Q6;A0A1A8D8C3;A0A1A8GCR2;A0A1A8I584;A0A1A8KR84;A0A1A8QNY9;A0A1A8SFC1;A0A060XII9;A0A087XQU7;A0A146NIL5;A0A146NIU7;A0A146NJR6;A0A146Q523;A0A146Z4H1;A0A146Z4J7;A0A146Z4K2;A0A146Z4L3;A0A146Z4P1;A0A146Z5L2;A0A146Z6F5;A0A146Z650;F1R443;F1R446;H2UIA9;H2UIB0;H2UIB1;M4A8R0;W5KTF3;W5KTG2	1.86448	25.3728	EKEPIVGSPDYGKDEDSAEALLK		67.62	830.747	2489.22	3	-0.0692612	82.4828
	A0A060XJX9;A0A0D9SGF6;A0A0P7V2T7;A0A0P7VEP4;A0A0R4IJ08;A0A060XII9;F1R443;F1R446;G3Q393;G3Q398;H2UIA9;H2UIB0;H2UIB1;H3C0G3;H3CBT9;I3JZ89;I3JZ90;Q4T9R4;Q4T9R5;Q13813;W5KTF3;W5KTG2;W5MFM2;W5MFP4	0.996473	0.855391	TATDEAYKDPSNLQGK		67.48	579.948	1736.82	3	2.06475	28.4351
	A0A060XJX9;A0A0D9SGF6;A0A0P7VEP4;A0A0R4IJ08;A0A0S7GFR3;A0A0S7GFS1;A0A0S7GFS2;A0A0S7GFS3;A0A0S7GG64;A0A0S7GGW2;A0A0S7GGW7;A0A0S7GKU3;A0A0S7GLM7;A0A0S7GNH5;A0A1A7WGD9;A0A1A7Z4A6;A0A1A8AIC9;A0A1A8DRB6;A0A1A8GCR2;A0A1A8KF62;A0A1A8MAY9;A0A1A8MXE6;A0A1A8QNY9;A0A1A8RNY5;A0A1A8SFC1;A0A1A8UI02;A0A060XII9;A0A087XQU7;A0A146NIL5;A0A146NIU7;A0A146NJR6;A0A146Q523;A0A146Z4H1;A0A146Z4J7;A0A146Z4K2;A0A146Z4L3;A0A…	1.68847	1.87492	DLMSWINGIR		67.46	602.812	1203.61	2	-0.298836	155.21
	A0A060XJX9;A0A0D9SGF6;A0A0P7V2T7;A0A0P7VEP4;A0A0R4IJ08;A0A0S7GFS1;A0A0S7GFS2;A0A0S7GFS3;A0A0S7GG64;A0A0S7GGW2;A0A0S7GGW7;A0A0S7GI92;A0A0S7GKU3;A0A0S7GLM7;A0A0S7GLW5;A0A1A7WGD9;A0A1A7Z4A6;A0A1A8AIC9;A0A1A8DRB6;A0A1A8GCR2;A0A1A8KF62;A0A1A8MAY9;A0A1A8MXE6;A0A1A8QNY9;A0A1A8RNY5;A0A1A8SFC1;A0A1A8UI02;A0A060XII9;A0A087XQU7;A0A146NIL5;A0A146NIU7;A0A146NJR6;A0A146Q523;A0A146Z4J7;A0A146Z4K2;A0A146Z4L3;A0A…	44.1651	0.424204	ASAFNSWFENAEEDLTDPVR		66.91	766.686	2297.04	3	6.9364	164.274
	A0A060XJX9;A0A1A7WGD9;A0A1A7Z4A6;A0A1A8AIC9;A0A1A8DRB6;A0A1A8GCR2;A0A1A8KF62;A0A1A8MAY9;A0A1A8MXE6;A0A1A8QNY9;A0A1A8RNY5;A0A1A8SFC1;A0A1A8UI02;A0A060XII9;G3Q393;G3Q398;H2MBY2;H2UIA9;H2UIB0;H2UIB1;H3C0G3;H3CBT9;I3JZ89;I3JZ90;Q4T9R4;W5KTF3;W5KTG2	1.11623	0.116383	GHYASPEIQQK		66.23	419.88	1256.62	3	6.94991	21.7151
	A0A060XJX9;A0A0D9SGF6;A0A0P7V2T7;A0A0P7VEP4;A0A0R4IJ08;A0A0S7GFR3;A0A0S7GFS2;A0A0S7GG64;A0A0S7GKU3;A0A0S7GLM7;A0A1A7WGD9;A0A1A7Z4A6;A0A1A8D2Q6;A0A1A8D8C3;A0A1A8GCR2;A0A1A8I584;A0A1A8KR84;A0A1A8MAY9;A0A1A8QC83;A0A1A8SFC1;A0A087XQU7;A0A146NIL5;A0A146NIU7;A0A146NJR6;A0A146Q523;A0A146Z4H1;A0A146Z4J7;A0A146Z4K2;A0A146Z4L3;A0A146Z4P1;A0A146Z5L2;A0A146Z6F5;A0A146Z650;F1R443;F1R446;G3Q393;G3Q398;H2MBY2;H…	1.77112	0.00401734	DVEDEETWIR		65.86	646.296	1290.58	2	5.49503	68.6247
	A0A060XJX9;A0A0P7VEP4;A0A0R4IJ08;A0A0S7GFS1;A0A0S7GFS2;A0A0S7GFS3;A0A0S7GG64;A0A0S7GGW2;A0A0S7GGW7;A0A0S7GI92;A0A0S7GKU3;A0A0S7GLM7;A0A0S7GLW5;A0A1A7WGD9;A0A1A7Z4A6;A0A1A8AIC9;A0A1A8DRB6;A0A1A8GCR2;A0A1A8KF62;A0A1A8MAY9;A0A1A8MXE6;A0A1A8QNY9;A0A1A8RNY5;A0A1A8SFC1;A0A1A8UI02;A0A060XII9;A0A087XQU7;A0A146NIL5;A0A146NIU7;A0A146NJR6;A0A146Q523;A0A146Z4J7;A0A146Z4K2;A0A146Z4L3;A0A146Z4P1;A0A146Z6F5;A0A…	357.792	2.6172	CNSLEEIR	[1] Methylthio (C)	65.69	505.229	1008.44	2	4.26409	42.7674
	A0A060XJX9;A0A0D9SGF6;A0A0P7V2T7;A0A0R4IJ08;A0A146Q523;A0A146Z4H1;A0A146Z4J7;A0A146Z4K2;A0A146Z4L3;A0A146Z4P1;A0A146Z5L2;A0A146Z6F5;A0A146Z650;F1QDX2;F1R443;F1R446;G3Q393;G3Q398;H2MBY2;H3C0G3;H3CBT9;I3JZ89;I3JZ90;Q4T9R4;Q4T9R5;Q13813;W5KTF3;W5KTG2;W5MFM2;W5MFP4	1.01779	0.0478746	VNSLGETAER		65.66	538.272	1074.53	2	-0.776137	20.515
	A0A060XJX9;A0A0D9SGF6;A0A0P7V2T7;A0A0P7VEP4;A0A0R4IJ08;A0A0S7GKQ9;A0A0S7GMT1;A0A0S7GRJ6;A0A1A7WGD9;A0A1A7Z4A6;A0A1A8D2Q6;A0A1A8D8C3;A0A1A8GCR2;A0A1A8I584;A0A1A8KR84;A0A1A8MAY9;A0A1A8QC83;A0A1A8SFC1;A0A1A8UI02;A0A060XII9;A0A087XQU7;A0A146Q523;A0A146Z4H1;A0A146Z4K2;A0A146Z4L3;A0A146Z4P1;A0A146Z5L2;A0A146Z6F5;A0A146Z650;F1R443;F1R446;G3Q393;G3Q398;H2MBY2;H2UIA9;H2UIB0;H2UIB1;H3C0G3;H3CBT9;I3JZ89;I3J…	0.821047	1.11662	ITALDEFATK		65	554.791	1107.57	2	-11.0637	72.3097
	A0A060XJX9;A0A0P7VEP4;A0A0R4IJ08;A0A0S7GFQ2;A0A0S7GFQ8;A0A0S7GFR3;A0A0S7GFS1;A0A0S7GFS2;A0A0S7GFS3;A0A0S7GG64;A0A0S7GGW2;A0A0S7GGW7;A0A0S7GI92;A0A0S7GKU3;A0A0S7GLM7;A0A0S7GLW5;A0A0S7GNH5;A0A1A7WGD9;A0A1A7Z4A6;A0A1A8AIC9;A0A1A8DRB6;A0A1A8GCR2;A0A1A8KF62;A0A1A8MAY9;A0A1A8MXE6;A0A1A8QNY9;A0A1A8RNY5;A0A1A8SFC1;A0A1A8UI02;A0A060XII9;A0A087XQU7;A0A146NIL5;A0A146NIU7;A0A146NJR6;A0A146Q523;A0A146Z4J7;A0A…	1.55949	1.01947	DLDDEESWIKEK		64.98	502.906	1505.7	3	3.79862	67.8497
	A0A060XJX9	183.034	42.3459	ALLNTGHYASEEVKEK		64.07	596.976	1787.91	3	-2.15687	42.2016
	A0A060XJX9;A0A0D9SGF6;A0A0P7V2T7;A0A0P7VEP4;A0A0R4IJ08;A0A0S7GFS2;A0A0S7GFS3;A0A0S7GGW7;A0A0S7GI92;A0A0S7GKU3;A0A1A7WGD9;A0A1A7Z4A6;A0A1A8AIC9;A0A1A8DRB6;A0A1A8GCR2;A0A1A8KF62;A0A1A8MAY9;A0A1A8MXE6;A0A1A8QNY9;A0A1A8RNY5;A0A1A8SFC1;A0A1A8UI02;A0A060XII9;A0A087XQU7;A0A146NIU7;A0A146Q523;A0A146Z4J7;A0A146Z4L3;A0A146Z4P1;A0A146Z6F5;A0A146Z650;C0PUV6;F1R443;F1R445;F1R446;F8K8N3;G3Q393;G3Q398;H2MBY2;H2…	0.00150252	0.0161301	MQHNLEQQIQAR		63.72	499.254	1494.74	3	-0.210263	31.0477
	A0A060XJX9;A0A060XII9	14.5832	0.330051	RLEAELGAHEPAIQSVQDTGKK		63.54	595.069	2376.25	4	3.21632	65.3767
	A0A060XJX9;A0A0P7VEP4;A0A0R4IJ08;A0A0S7GFR3;A0A0S7GFS1;A0A0S7GFS2;A0A0S7GFS3;A0A0S7GG64;A0A0S7GGW2;A0A0S7GGW7;A0A0S7GKU3;A0A0S7GLM7;A0A0S7GNH5;A0A1A7WGD9;A0A1A7Z4A6;A0A1A8AIC9;A0A1A8DRB6;A0A1A8GCR2;A0A1A8KF62;A0A1A8MAY9;A0A1A8MXE6;A0A1A8QNY9;A0A1A8RNY5;A0A1A8SFC1;A0A1A8UI02;A0A060XII9;A0A087XQU7;A0A146NIL5;A0A146NIU7;A0A146NJR6;A0A146Q523;A0A146Z4H1;A0A146Z4J7;A0A146Z4K2;A0A146Z4L3;A0A146Z4P1;A0A…	1.51961	32.2562	LIQSHPEAVDDIQEK		63.33	574.629	1720.86	3	2.61635	42.2722
	A0A060XJX9;A0A0P7V2T7;A0A0P7VEP4;A0A0R4IJ08;A0A0S7GKE8;A0A0S7GMT1;A0A0S7GQA6;A0A1A7WGD9;A0A1A7Z4A6;A0A1A8D2Q6;A0A1A8D8C3;A0A1A8GCR2;A0A1A8I584;A0A1A8KR84;A0A1A8MAY9;A0A1A8QC83;A0A1A8SFC1;A0A1A8UI02;A0A060XII9;A0A087XQU7;A0A146Q523;A0A146Z4H1;A0A146Z4K2;A0A146Z4L3;A0A146Z4P1;A0A146Z5L2;A0A146Z6F5;A0A146Z650;F1R443;F1R446;G3Q393;G3Q398;H2MBY2;I3JZ89;I3JZ90;M4A8R0;Q566W8;W5KTF3;W5KTG2;W5MFM2;W5MFP4	4.7557	1.01947	ALINADELANDVAGAEALLDR		63.3	1077.56	2153.1	2	2.01469	185.541
	A0A060XJX9;A0A0S7GKE8;A0A0S7GMT1;A0A0S7GQA6;A0A060XII9;A0A087XQU7;M4A8R0	1.2645	0.85369	KFEEFQTDLAAHEERVNEVNQLAGK		62.94	726.365	2901.43	4	0.108056	86.718
	A0A060XJX9;A0A0D9SGF6;A0A0P7VEP4;A0A0R4IJ08;A0A0S7GFR3;A0A0S7GFS2;A0A0S7GG64;A0A0S7GKU3;A0A0S7GLM7;A0A1A7WGD9;A0A1A7Z4A6;A0A1A8D2Q6;A0A1A8D8C3;A0A1A8GCR2;A0A1A8I584;A0A1A8KR84;A0A1A8MAY9;A0A1A8QC83;A0A1A8SFC1;A0A1A8UI02;A0A060XII9;A0A087XQU7;A0A146NJR6;A0A146Q523;A0A146Z4H1;A0A146Z4J7;A0A146Z4K2;A0A146Z4L3;A0A146Z4P1;A0A146Z5L2;A0A146Z6F5;A0A146Z650;F1R443;F1R446;G3Q393;G3Q398;H2MBY2;H2UIA9;H2UIB…	0.908829	0.475904	HALLEADVAAHQDR		62.69	515.936	1544.79	3	10.1322	40.423
	A0A060XJX9;A0A0R4IJ08;A0A0S7GFQ8;A0A0S7GFR3;A0A0S7GFS1;A0A0S7GFS2;A0A0S7GFS3;A0A0S7GFT9;A0A0S7GG64;A0A0S7GGW2;A0A0S7GGW7;A0A0S7GKU3;A0A0S7GLM7;A0A0S7GNH5;A0A1A7WGD9;A0A1A7Z4A6;A0A1A8AIC9;A0A1A8DRB6;A0A1A8GCR2;A0A1A8KF62;A0A1A8MAY9;A0A1A8MXE6;A0A1A8QNY9;A0A1A8RNY5;A0A1A8SFC1;A0A1A8UI02;A0A060XII9;A0A087XQU7;A0A146NIL5;A0A146NIU7;A0A146NJR6;A0A146Q523;A0A146Z4H1;A0A146Z4J7;A0A146Z4K2;A0A146Z4L3;A0A…	1.64574	1.01947	EAFLASDDKGDSLDSVEALIK		62.33	1112.06	2222.1	2	1.50482	138.153
	A0A060XJX9	13.5457	0.0536784	GVIDTGNALIHR		62.31	422.57	1264.69	3	-0.757972	66.0822
	A0A060XJX9;A0A060XII9;C0PUV6	5.68741	0.988956	EMPSAFDFVEFTR		62.1	788.364	1574.71	2	2.55917	146.885
	A0A060XJX9;A0A0D9SGF6;A0A0P7VEP4;A0A0R4IJ08;A0A0S7GFQ2;A0A0S7GFQ8;A0A0S7GFR3;A0A0S7GFS1;A0A0S7GFS2;A0A0S7GFS3;A0A0S7GG64;A0A0S7GGW2;A0A0S7GGW7;A0A0S7GI92;A0A0S7GKU3;A0A0S7GLM7;A0A0S7GLW5;A0A0S7GNH5;A0A1A7WGD9;A0A1A7Z4A6;A0A1A8AIC9;A0A1A8DRB6;A0A1A8GCR2;A0A1A8KF62;A0A1A8MAY9;A0A1A8MXE6;A0A1A8QNY9;A0A1A8RNY5;A0A1A8SFC1;A0A1A8UI02;A0A060XII9;A0A087XQU7;A0A146NIL5;A0A146NIU7;A0A146NJR6;A0A146Q523;A0A…	4.71858	1.01947	LEESLEYQQFVANVEEEEAWINEK		62.07	976.131	2925.37	3	4.07214	165.566
	A0A060XJX9;A0A0P7VEP4;A0A0R4IJ08;A0A0S7GFQ2;A0A0S7GFQ8;A0A0S7GFR3;A0A0S7GFS1;A0A0S7GFS2;A0A0S7GFS3;A0A0S7GG64;A0A0S7GGW2;A0A0S7GGW7;A0A0S7GI92;A0A0S7GKU3;A0A0S7GLM7;A0A0S7GLW5;A0A0S7GNH5;A0A1A7WGD9;A0A1A7Z4A6;A0A1A8AIC9;A0A1A8DRB6;A0A1A8GCR2;A0A1A8KF62;A0A1A8MAY9;A0A1A8MXE6;A0A1A8QNY9;A0A1A8RNY5;A0A1A8SFC1;A0A1A8UI02;A0A060XII9;A0A087XQU7;A0A146NIL5;A0A146NIU7;A0A146NJR6;A0A146Q523;A0A146Z4J7;A0A…	7.88007	0.0992557	DLDDEESWIK		60.1	625.285	1248.56	2	4.38244	78.0972
	A0A060XJX9;A0A0P7V2T7;A0A0S7GFS1;A0A0S7GFS2;A0A0S7GFS3;A0A0S7GG64;A0A0S7GGW2;A0A0S7GGW7;A0A0S7GI92;A0A0S7GKU3;A0A0S7GLM7;A0A0S7GLW5;A0A1A7WGD9;A0A1A7Z4A6;A0A1A8AIC9;A0A1A8DRB6;A0A1A8GCR2;A0A1A8KF62;A0A1A8MAY9;A0A1A8MXE6;A0A1A8QNY9;A0A1A8RNY5;A0A1A8SFC1;A0A1A8UI02;A0A146NIL5;A0A146NIU7;A0A146NJR6;A0A146Q523;A0A146Z4J7;A0A146Z4K2;A0A146Z4L3;A0A146Z4P1;A0A146Z6F5;A0A146Z650;C0PUV6;G3Q393;G3Q398;H2MB…	0.915266	0.700824	LLEAQEHFR		59.87	571.799	1141.58	2	-6.0651	40.3512
	A0A060XJX9	1.75186	0.856305	LAQFEEHWMELK		59.23	520.923	1559.75	3	5.43657	100.905
	A0A060XJX9;A0A0P7VEP4;A0A060XII9;W5KTF3;W5KTG2;W5MFM2;W5MFP4	1.2209	0.885881	RDELITNWEQIR		59.13	524.945	1571.81	3	1.41583	87.0717
	A0A060XJX9;A0A0D9SGF6;A0A0P7V2T7;A0A0P7VEP4;A0A0R4IJ08;A0A0S7GFQ2;A0A0S7GFQ8;A0A0S7GFR3;A0A0S7GFS1;A0A0S7GFS2;A0A0S7GFS3;A0A0S7GG64;A0A0S7GGW2;A0A0S7GGW7;A0A0S7GI92;A0A0S7GKU3;A0A0S7GLM7;A0A0S7GLW5;A0A0S7GNH5;A0A1A7WGD9;A0A1A7Z4A6;A0A1A8AIC9;A0A1A8DRB6;A0A1A8GCR2;A0A1A8KF62;A0A1A8MAY9;A0A1A8MXE6;A0A1A8QNY9;A0A1A8RNY5;A0A1A8SFC1;A0A1A8UI02;A0A060XII9;A0A087XQU7;A0A146NIL5;A0A146NIU7;A0A146NJR6;A0A…	0.128867	41.2466	HQAFEAELHANADR		59.07	536.923	1607.75	3	3.95866	36.1187
	A0A060XJX9;A0A060XII9;C0PUV6	924.684	47.2475	ALSVDAKPYVTKEELYQNLSK		58.43	799.431	2395.27	3	4.45808	87.213
	A0A060XJX9;A0A0R4IJ08;A0A0S7GFR3;A0A0S7GFS1;A0A0S7GFS2;A0A0S7GFS3;A0A0S7GG64;A0A0S7GGW2;A0A0S7GGW7;A0A0S7GKU3;A0A0S7GLM7;A0A0S7GNH5;A0A1A7WGD9;A0A1A7Z4A6;A0A1A8AIC9;A0A1A8DRB6;A0A1A8GCR2;A0A1A8MAY9;A0A1A8MXE6;A0A1A8QNY9;A0A1A8RNY5;A0A1A8SFC1;A0A1A8UI02;A0A060XII9;A0A087XQU7;A0A146NIL5;A0A146NIU7;A0A146NJR6;A0A146Q523;A0A146Z4H1;A0A146Z4J7;A0A146Z4K2;A0A146Z4L3;A0A146Z4P1;A0A146Z5L2;A0A146Z6F5;A0A…	1.11941	0.935289	SNMLGSAHEVQR		58.43	443.55	1327.63	3	-0.271899	27.1652
	A0A060XJX9;A0A0D9SGF6;A0A0P7VEP4;A0A0R4IJ08;A0A0S7GKE8;A0A0S7GMT1;A0A0S7GQA6;A0A1A7WGD9;A0A1A7Z4A6;A0A1A8D2Q6;A0A1A8D8C3;A0A1A8GCR2;A0A1A8I584;A0A1A8KR84;A0A1A8MAY9;A0A1A8QC83;A0A1A8SFC1;A0A1A8UI02;A0A060XII9;A0A087XQU7;A0A146Q523;A0A146Z4H1;A0A146Z4K2;A0A146Z4L3;A0A146Z4P1;A0A146Z5L2;A0A146Z6F5;F1R443;F1R446;G3Q393;G3Q398;H2MBY2;H2UIA9;H2UIB0;H2UIB1;H3C0G3;H3CBT9;M4A8R0;Q4T9R4;Q566W8;Q13813;W5KT…	9.5342	1.23316	EQLMASDDFGR		57.64	634.784	1267.55	2	1.9613	56.4104
	A0A060XJX9;A0A060XII9	0.957921	0.953314	LSQESHPEAELIVR		57.4	536.619	1606.83	3	3.01028	58.1087
	A0A060XJX9;A0A0D9SGF6;A0A0P7VEP4;A0A0R4IJ08;A0A0S7GKE8;A0A0S7GMT1;A0A0S7GQA6;A0A1A7WGD9;A0A1A7Z4A6;A0A1A8D2Q6;A0A1A8D8C3;A0A1A8GCR2;A0A1A8I584;A0A1A8KR84;A0A1A8MAY9;A0A1A8QC83;A0A1A8SFC1;A0A1A8UI02;A0A060XII9;A0A087XQU7;A0A146Q523;A0A146Z4H1;A0A146Z4K2;A0A146Z4L3;A0A146Z4P1;A0A146Z5L2;A0A146Z6F5;F1R443;F1R446;G3Q393;G3Q398;H2MBY2;H2UIA9;H2UIB0;H2UIB1;H3C0G3;H3CBT9;M4A8R0;Q4T9R4;Q566W8;Q13813;W5KT…	0.0416343	6.13441	EKEQLMASDDFGRDLASVQALLR		57.25	648.836	2591.31	4	5.12752	164.992
	A0A060XJX9;A0A0D9SGF6;A0A0P7V2T7;A0A0P7VEP4;A0A0R4IJ08;A0A0S7GFQ8;A0A0S7GFR3;A0A0S7GFS1;A0A0S7GFS2;A0A0S7GFS3;A0A0S7GFT9;A0A0S7GG64;A0A0S7GGW2;A0A0S7GGW7;A0A0S7GKU3;A0A0S7GLM7;A0A0S7GNH5;A0A1A7WGD9;A0A1A7Z4A6;A0A1A8AIC9;A0A1A8DRB6;A0A1A8GCR2;A0A1A8KF62;A0A1A8MAY9;A0A1A8MXE6;A0A1A8QNY9;A0A1A8RNY5;A0A1A8SFC1;A0A1A8UI02;A0A060XII9;A0A087XQU7;A0A146NIL5;A0A146NIU7;A0A146NJR6;A0A146Q523;A0A146Z4H1;A0A…	176.124	1.01947	SKLGESQTLQQFSR		57.05	804.917	1607.82	2	-6.37406	53.0722
	A0A060XJX9;A0A060XII9;C0PUV6	0.0019573	0.0106011	ALSVDAKPYVTKEELYQNLSK		56.54	599.825	2395.27	4	3.71417	86.6474
	A0A060XJX9;A0A0D9SGF6;A0A0P7V2T7;A0A0P7VEP4;A0A0R4IJ08;A0A0S7GKE8;A0A0S7GMT1;A0A0S7GQA6;A0A1A7WGD9;A0A1A7Z4A6;A0A1A8D2Q6;A0A1A8D8C3;A0A1A8GCR2;A0A1A8I584;A0A1A8KR84;A0A1A8MAY9;A0A1A8QC83;A0A1A8SFC1;A0A1A8UI02;A0A060XII9;A0A087XQU7;A0A146Q523;A0A146Z4H1;A0A146Z4K2;A0A146Z4L3;A0A146Z4P1;A0A146Z5L2;A0A146Z6F5;F1R443;F1R446;H2UIA9;H2UIB0;H2UIB1;I3JZ89;I3JZ90;M4A8R0;Q4T9R4;Q4T9R5;Q566W8;Q13813;W5KTF3;…	1.06504	1.20015	FNRDVDETISWIK		56.12	541.613	1621.82	3	3.67186	98.3523
	A0A060XJX9;A0A0D9SGF6;A0A0P7V2T7;A0A0R4IJ08;A0A0S7GFR3;A0A0S7GFS1;A0A0S7GFS2;A0A0S7GFS3;A0A0S7GG64;A0A0S7GGW2;A0A0S7GGW7;A0A0S7GKU3;A0A0S7GLM7;A0A0S7GNH5;A0A1A7WGD9;A0A1A7Z4A6;A0A1A8AIC9;A0A1A8DRB6;A0A1A8GCR2;A0A1A8MAY9;A0A1A8MXE6;A0A1A8QNY9;A0A1A8RNY5;A0A1A8SFC1;A0A1A8UI02;A0A060XII9;A0A087XQU7;A0A146NIL5;A0A146NIU7;A0A146NJR6;A0A146Q523;A0A146Z4H1;A0A146Z4J7;A0A146Z4K2;A0A146Z4L3;A0A146Z4P1;A0A…	377.696	18.7436	DADETKEWIEEK		55.6	498.234	1491.68	3	7.33982	44.8114
	A0A060XJX9;A0A0P7V2T7;A0A0S7GFR3;A0A0S7GFS1;A0A0S7GFS2;A0A0S7GFS3;A0A0S7GG64;A0A0S7GGW2;A0A0S7GGW7;A0A0S7GKU3;A0A0S7GLM7;A0A0S7GNH5;A0A1A7WGD9;A0A1A7Z4A6;A0A1A8AIC9;A0A1A8DRB6;A0A1A8GCR2;A0A1A8KF62;A0A1A8MAY9;A0A1A8MXE6;A0A1A8QNY9;A0A1A8RNY5;A0A1A8SFC1;A0A1A8UI02;A0A087XQU7;A0A146NIL5;A0A146NIU7;A0A146NJR6;A0A146Q523;A0A146Z4H1;A0A146Z4J7;A0A146Z4K2;A0A146Z4L3;A0A146Z4P1;A0A146Z5L2;A0A146Z6F5;A0A…	0.476975	75.7443	GLVSSEELAKDVTGAEALLER		54.75	547.545	2186.15	4	5.63577	155.21
	A0A060XJX9;A0A0D9SGF6;A0A0P7VEP4;A0A0R4IJ08;A0A0S7GKE8;A0A0S7GMT1;A0A0S7GQA6;A0A1A7WGD9;A0A1A7Z4A6;A0A1A8D2Q6;A0A1A8D8C3;A0A1A8GCR2;A0A1A8I584;A0A1A8KR84;A0A1A8MAY9;A0A1A8QC83;A0A1A8SFC1;A0A1A8UI02;A0A060XII9;A0A087XQU7;A0A146Q523;A0A146Z4H1;A0A146Z4K2;A0A146Z4L3;A0A146Z4P1;A0A146Z5L2;A0A146Z6F5;F1R443;F1R446;G3Q393;G3Q398;H2MBY2;H2UIA9;H2UIB0;H2UIB1;H3C0G3;H3CBT9;M4A8R0;Q4T9R4;Q566W8;Q13813;W5KT…	0.13822	0.0380785	EQLMASDDFGRDLASVQALLR		53.67	779.066	2334.18	3	7.43772	168.006
	A0A060XJX9;A0A060XII9	11.5128	0.884338	GEAMVEEGHFAGEEVK		53.01	573.597	1717.77	3	5.08649	52.86
	A0A060XJX9;A0A0P7VEP4;A0A0R4IJ08;A0A0S7GFR3;A0A0S7GFS1;A0A0S7GFS2;A0A0S7GFS3;A0A0S7GG64;A0A0S7GGW2;A0A0S7GGW7;A0A0S7GKU3;A0A0S7GLM7;A0A0S7GNH5;A0A1A7WGD9;A0A1A7Z4A6;A0A1A8AIC9;A0A1A8DRB6;A0A1A8GCR2;A0A1A8KF62;A0A1A8MAY9;A0A1A8MXE6;A0A1A8QNY9;A0A1A8RNY5;A0A1A8SFC1;A0A1A8UI02;A0A060XII9;A0A087XQU7;A0A146NIL5;A0A146NIU7;A0A146NJR6;A0A146Q523;A0A146Z4H1;A0A146Z4J7;A0A146Z4K2;A0A146Z4L3;A0A146Z4P1;A0A…	7.67321	210.65	LIQSHPEAVDDIQEK		52.66	861.44	1720.86	2	2.68113	42.2016
	A0A060XJX9;A0A0D9SGF6;A0A0P7V2T7;A0A0P7VEP4;A0A0R4IJ08;A0A0S7GFR3;A0A0S7GFS2;A0A0S7GG64;A0A0S7GKU3;A0A0S7GLM7;A0A1A7WGD9;A0A1A7Z4A6;A0A1A8D2Q6;A0A1A8D8C3;A0A1A8GCR2;A0A1A8I584;A0A1A8KR84;A0A1A8MAY9;A0A1A8QC83;A0A1A8SFC1;A0A1A8UI02;A0A060XII9;A0A087XQU7;A0A146NJR6;A0A146Q523;A0A146Z4H1;A0A146Z4J7;A0A146Z4K2;A0A146Z4L3;A0A146Z4P1;A0A146Z5L2;A0A146Z6F5;A0A146Z650;F1R443;F1R446;G3Q393;G3Q398;H2MBY2;H…	1.0417	0.0543832	LREANQQQQFNR		52.37	511.262	1530.76	3	-4.27043	20.2292
	A0A060XJX9;A0A060XII9	1.04031	8.8052	AVTQKGEAMVEEGHFAGEEVK		51.23	562.277	2245.08	4	4.12197	58.25
	A0A060XJX9;A0A0D9SGF6;A0A0P7V2T7;A0A0P7VEP4;A0A0R4IJ08;A0A0S7GKE8;A0A0S7GMT1;A0A0S7GQA6;A0A1A7WGD9;A0A1A7Z4A6;A0A1A8D2Q6;A0A1A8D8C3;A0A1A8GCR2;A0A1A8I584;A0A1A8KR84;A0A1A8MAY9;A0A1A8QC83;A0A1A8SFC1;A0A1A8UI02;A0A060XII9;A0A087XQU7;A0A146Q523;A0A146Z4H1;A0A146Z4K2;A0A146Z4L3;A0A146Z4P1;A0A146Z5L2;A0A146Z6F5;F1R443;F1R446;G3Q393;G3Q398;H2UIA9;H2UIB0;H2UIB1;H3C0G3;H3CBT9;I3JZ89;I3JZ90;M4A8R0;Q4T9R4;…	0.0367097	0.749109	DVDETISWIK		51.1	603.309	1204.6	2	2.06903	95.814
	A0A060XJX9;A0A060XII9;C0PUV6	0.00380664	1.01947	NTTGVTEDALKEFSMMFK		50.74	1024.99	2047.96	2	-1.91757	172.941
	A0A060XJX9;A0A0D9SGF6;A0A0P7VEP4;A0A0R4IJ08;A0A0S7GFR3;A0A0S7GFS2;A0A0S7GG64;A0A0S7GKU3;A0A0S7GLM7;A0A1A7WGD9;A0A1A7Z4A6;A0A1A8D2Q6;A0A1A8D8C3;A0A1A8GCR2;A0A1A8I584;A0A1A8KR84;A0A1A8MAY9;A0A1A8QC83;A0A1A8SFC1;A0A1A8UI02;A0A060XII9;A0A087XQU7;A0A146NJR6;A0A146Q523;A0A146Z4H1;A0A146Z4J7;A0A146Z4K2;A0A146Z4L3;A0A146Z4P1;A0A146Z5L2;A0A146Z6F5;A0A146Z650;F1R443;F1R446;G3Q393;G3Q398;H2UIA9;H2UIB0;H2UIB…	1.30642	0.821557	LLEATELK		50.6	458.772	915.529	2	-0.816887	51.8015
	A0A060XJX9;A0A060XII9;C0PUV6	1.03818	1.10592	EMPSAFDFVEFTR		50.38	525.913	1574.72	3	3.72373	146.956
	A0A060XJX9;A0A0P7VEP4;A0A0S7GKE8;A0A0S7GMT1;A0A0S7GQA6;A0A060XII9;A0A087XQU7;G3Q393;G3Q398;H2MBY2;M4A8R0;W5KTF3;W5KTG2	0.00302745	0.927096	LQQTHPQNASQIHLK		50.1	581.649	1741.92	3	2.82737	28.7175
	A0A060XJX9;A0A0D9SGF6;A0A0P7VEP4;A0A060XII9;G3Q393;G3Q398;H2MBY2;H2UIA9;H2UIB0;H2UIB1;H3C0G3;H3CBT9;I3JZ89;I3JZ90;Q4T9R4;Q4T9R5;Q13813;W5KTF3;W5KTG2	0.245887	216.521	EKEPIAASTNR		49.93	405.882	1214.62	3	-5.4443	13.345
	A0A060XJX9;A0A0P7VEP4;A0A0R4IJ08;A0A060XII9;F1R443;F1R446;G3Q393;G3Q398;H2UIA9;H2UIB0;H2UIB1;H3C0G3;H3CBT9;I3JZ89;I3JZ90;Q4T9R4;W5KTF3;W5KTG2;W5MFM2;W5MFP4	0.837064	1.10897	LLVSSEDYGRDLTGVQNLR		48.03	712.376	2134.11	3	2.65968	98.3523
	A0A060XJX9;A0A0D9SGF6;A0A0P7V2T7;A0A0P7VEP4;A0A0R4IJ08;A0A0S7GFQ2;A0A0S7GFQ8;A0A0S7GFR3;A0A0S7GFS1;A0A0S7GFS2;A0A0S7GFS3;A0A0S7GG64;A0A0S7GGW2;A0A0S7GGW7;A0A0S7GI92;A0A0S7GKU3;A0A0S7GLM7;A0A0S7GLW5;A0A0S7GNH5;A0A1A7WGD9;A0A1A7Z4A6;A0A1A8AIC9;A0A1A8DRB6;A0A1A8GCR2;A0A1A8KF62;A0A1A8MAY9;A0A1A8MXE6;A0A1A8QNY9;A0A1A8RNY5;A0A1A8SFC1;A0A1A8UI02;A0A060XII9;A0A087XQU7;A0A146NIL5;A0A146NIU7;A0A146NJR6;A0A…	0.953975	0.827656	DLTGVQNLR		47.62	508.28	1014.55	2	-4.07736	50.4624
	A0A060XJX9;A0A0P7VEP4;A0A0S7GKE8;A0A0S7GMT1;A0A0S7GQA6;A0A060XII9;A0A087XQU7;G3Q393;G3Q398;H2MBY2;M4A8R0;W5KTF3;W5KTG2	0.108311	0.892203	LQQTHPQNASQIHLK		47.42	436.489	1741.93	4	4.37772	28.7175
	A0A060XJX9;A0A0D9SGF6;A0A0P7V2T7;A0A0P7VEP4;A0A0R4IJ08;A0A0S7GFQ8;A0A0S7GFR3;A0A0S7GFS1;A0A0S7GFS2;A0A0S7GFS3;A0A0S7GFT9;A0A0S7GG64;A0A0S7GGW2;A0A0S7GGW7;A0A0S7GKU3;A0A0S7GLM7;A0A0S7GNH5;A0A1A7WGD9;A0A1A7Z4A6;A0A1A8AIC9;A0A1A8DRB6;A0A1A8GCR2;A0A1A8KF62;A0A1A8MAY9;A0A1A8MXE6;A0A1A8QNY9;A0A1A8RNY5;A0A1A8SFC1;A0A1A8UI02;A0A060XII9;A0A087XQU7;A0A146NIL5;A0A146NIU7;A0A146NJR6;A0A146Q523;A0A146Z4H1;A0A…	11.0449	93.973	SKLGESQTLQQFSR		46.81	536.945	1607.81	3	-10.3331	53.0722
	A0A060XJX9;A0A060XII9	2.50218	0.193295	HYAADEVSVR		46.8	573.783	1145.55	2	1.9478	24.5531
	A0A060XJX9;A0A060XII9	0.110432	1.01947	LGVLTEEKESLLELWEVRR		44.25	767.096	2298.27	3	3.31325	174.662
	A0A060XJX9;A0A060XII9	175.073	0.137542	LKDLNGQADSLTASTAFDPTQVK		42.97	807.417	2419.23	3	3.52823	92.9938
	A0A060XJX9	2.08822	153.178	RAALEDSFHLQQFSR		42.53	451.983	1803.9	4	1.12291	83.3995
	A0A060XJX9;A0A060XII9	505.965	0.488763	RLEAELGAHEPAIQSVQDTGKK		38.63	476.255	2376.24	5	-0.745109	65.4472
	A0A060XJX9;A0A0D9SGF6;A0A0P7V2T7;A0A0P7VEP4;A0A0R4IJ08;A0A0S7GFQ8;A0A0S7GFR3;A0A0S7GFS1;A0A0S7GFS2;A0A0S7GFS3;A0A0S7GFT9;A0A0S7GG64;A0A0S7GGW2;A0A0S7GGW7;A0A0S7GKU3;A0A0S7GLM7;A0A0S7GNH5;A0A1A7WGD9;A0A1A7Z4A6;A0A1A8AIC9;A0A1A8DRB6;A0A1A8GCR2;A0A1A8KF62;A0A1A8MAY9;A0A1A8MXE6;A0A1A8QNY9;A0A1A8RNY5;A0A1A8SFC1;A0A1A8UI02;A0A060XII9;A0A087XQU7;A0A146NIL5;A0A146NIU7;A0A146NJR6;A0A146Q523;A0A146Z4H1;A0A…	1.03591	0.81451	LGESQTLQQFSR		37.01	465.242	1392.7	3	2.45396	58.6754
	A0A060XJX9;A0A0D9SGF6;A0A0P7VEP4;A0A0R4IJ08;A0A0S7GFS1;A0A0S7GFS2;A0A0S7GFS3;A0A0S7GG64;A0A0S7GGW2;A0A0S7GGW7;A0A0S7GI92;A0A0S7GKU3;A0A0S7GLM7;A0A0S7GLW5;A0A1A7WGD9;A0A1A7Z4A6;A0A1A8AIC9;A0A1A8DRB6;A0A1A8GCR2;A0A1A8KF62;A0A1A8MAY9;A0A1A8MXE6;A0A1A8QNY9;A0A1A8RNY5;A0A1A8SFC1;A0A1A8UI02;A0A060XII9;A0A087XQU7;A0A146NIL5;A0A146NIU7;A0A146NJR6;A0A146Q523;A0A146Z4J7;A0A146Z4K2;A0A146Z4L3;A0A146Z4P1;A0A…	1.53291	0.988724	KVEDLFLTFAK		36.93	655.857	1309.7	2	-23.1591	119.386
	A0A060XJX9;A0A0D9SGF6;A0A0P7V2T7;A0A0P7VEP4;A0A0R4IJ08;A0A0S7GFR3;A0A0S7GFS2;A0A0S7GG64;A0A0S7GKU3;A0A0S7GLM7;A0A1A7WGD9;A0A1A7Z4A6;A0A1A8D2Q6;A0A1A8GCR2;A0A1A8I584;A0A1A8KR84;A0A1A8MAY9;A0A1A8SFC1;A0A060XII9;A0A087XQU7;A0A146NIL5;A0A146NIU7;A0A146NJR6;A0A146Q523;A0A146Z4H1;A0A146Z4J7;A0A146Z4L3;A0A146Z4P1;A0A146Z5L2;A0A146Z6F5;A0A146Z650;F1R443;F1R446;G3Q393;G3Q398;H2MBY2;H2UIA9;H2UIB0;H2UIB1;H3…	1.12398	1.23248	GKDLIGVQNLLKK		36.53	357.226	1424.87	4	2.74437	80.7888
	A0A060XJX9;A0A060XII9	1.07324	0.959841	LEALDHERADLEK		35.73	513.6	1537.78	3	4.7359	40.5674
	A0A060XJX9;A0A0D9SGF6;A0A0P7V2T7;A0A0P7VEP4;A0A0R4IJ08;A0A0S7GFQ8;A0A0S7GFR3;A0A0S7GFS1;A0A0S7GFS2;A0A0S7GFS3;A0A0S7GFT9;A0A0S7GG64;A0A0S7GGW2;A0A0S7GGW7;A0A0S7GKU3;A0A0S7GLM7;A0A0S7GNH5;A0A1A7WGD9;A0A1A7Z4A6;A0A1A8AIC9;A0A1A8DRB6;A0A1A8GCR2;A0A1A8KF62;A0A1A8MAY9;A0A1A8MXE6;A0A1A8QNY9;A0A1A8RNY5;A0A1A8SFC1;A0A1A8UI02;A0A060XII9;A0A087XQU7;A0A146NIL5;A0A146NIU7;A0A146NJR6;A0A146Q523;A0A146Z4H1;A0A…	1.03818	173.829	KHEDFDKAINVQEEK		32.61	458.234	1828.91	4	4.44861	30.8362
W5KTG2	95	1.36222	1.01947	95
	W5KTG2;A0A0D9SGF6;A0A0R4IJ08;A0A0S7GFR3;A0A0S7GFS1;A0A0S7GFS2;A0A0S7GFS3;A0A0S7GG64;A0A0S7GGW2;A0A0S7GGW7;A0A0S7GKU3;A0A0S7GLM7;A0A0S7GNH5;A0A1A7WGD9;A0A1A7Z4A6;A0A1A8GCR2;A0A1A8MAY9;A0A1A8MXE6;A0A1A8QNY9;A0A1A8RNY5;A0A1A8SFC1;A0A060XII9;A0A060XJX9;A0A087XQU7;A0A146NIL5;A0A146NIU7;A0A146NJR6;A0A146Q523;A0A146Z4H1;A0A146Z4J7;A0A146Z4K2;A0A146Z4L3;A0A146Z4P1;A0A146Z5L2;A0A146Z6F5;A0A146Z650;F1QDX2;…	1.10634	0.946459	NQALNTDNYGHDLASVQALQR		127.8	776.717	2327.13	3	-0.924291	82.1301
	W5KTG2;A0A060XII9;A0A060XJX9;W5KTF3	1.36575	1.12044	DLAALEDKVNTLGGEAER		127.25	950.985	1899.96	2	3.09066	100.048
	W5KTG2;A0A0P7VEP4;A0A0S7GFQ8;A0A0S7GFR3;A0A0S7GFS1;A0A0S7GFS2;A0A0S7GFS3;A0A0S7GFT9;A0A0S7GG64;A0A0S7GGW2;A0A0S7GGW7;A0A0S7GKU3;A0A0S7GLM7;A0A0S7GNH5;A0A1A7WGD9;A0A1A7Z4A6;A0A1A8AIC9;A0A1A8DRB6;A0A1A8GCR2;A0A1A8KF62;A0A1A8MAY9;A0A1A8MXE6;A0A1A8QNY9;A0A1A8RNY5;A0A1A8SFC1;A0A1A8UI02;A0A060XII9;A0A060XJX9;A0A087XQU7;I3JZ89;I3JZ90;M4A8R0;W5KTF3	0.0290227	34.4391	AGTFQAFEQFGQQLLAR		122.22	956.489	1910.96	2	1.61374	169.873
	W5KTG2;A0A0R4IJ08;A0A0S7GFS1;A0A0S7GFS2;A0A0S7GFS3;A0A0S7GG64;A0A0S7GGW2;A0A0S7GGW7;A0A0S7GI92;A0A0S7GKU3;A0A0S7GLM7;A0A0S7GLW5;A0A1A7WGD9;A0A1A7Z4A6;A0A1A8AIC9;A0A1A8DRB6;A0A1A8GCR2;A0A1A8KF62;A0A1A8MAY9;A0A1A8MXE6;A0A1A8QNY9;A0A1A8RNY5;A0A1A8SFC1;A0A1A8UI02;A0A060XII9;A0A060XJX9;A0A087XQU7;A0A146NIL5;A0A146NIU7;A0A146NJR6;A0A146Q523;A0A146Z4J7;A0A146Z4K2;A0A146Z4L3;A0A146Z4P1;A0A146Z6F5;A0A146Z…	1.12788	1556.08	LNLVGSEDYGDTLAAVQGLLK		115.77	726.054	2175.14	3	0.603017	171.724
	W5KTG2;A0A0R4IJ08;A0A0S7GFS1;A0A0S7GFS2;A0A0S7GFS3;A0A0S7GG64;A0A0S7GGW2;A0A0S7GGW7;A0A0S7GI92;A0A0S7GKU3;A0A0S7GLM7;A0A0S7GLW5;A0A1A7WGD9;A0A1A7Z4A6;A0A1A8AIC9;A0A1A8DRB6;A0A1A8GCR2;A0A1A8KF62;A0A1A8MAY9;A0A1A8MXE6;A0A1A8QNY9;A0A1A8RNY5;A0A1A8SFC1;A0A1A8UI02;A0A060XII9;A0A060XJX9;A0A087XQU7;A0A146NIL5;A0A146NIU7;A0A146NJR6;A0A146Q523;A0A146Z4J7;A0A146Z4K2;A0A146Z4L3;A0A146Z4P1;A0A146Z6F5;A0A146Z…	16.1158	1.01947	LNLVGSEDYGDTLAAVQGLLK		109.97	1088.58	2175.15	2	6.71343	175.929
	W5KTG2;A0A0D9SGF6;A0A0P7V2T7;A0A0P7VEP4;A0A0R4IJ08;A0A0S7GFS1;A0A0S7GFS2;A0A0S7GFS3;A0A0S7GG64;A0A0S7GGW2;A0A0S7GGW7;A0A0S7GI92;A0A0S7GKU3;A0A0S7GLM7;A0A0S7GLW5;A0A1A7WGD9;A0A1A7Z4A6;A0A1A8AIC9;A0A1A8DRB6;A0A1A8GCR2;A0A1A8KF62;A0A1A8MAY9;A0A1A8MXE6;A0A1A8QNY9;A0A1A8RNY5;A0A1A8SFC1;A0A1A8UI02;A0A1B0GV13;A0A060XII9;A0A060XJX9;A0A087XQU7;A0A146NIL5;A0A146NIU7;A0A146NJR6;A0A146Q523;A0A146Z4J7;A0A146Z…	1.62303	0.582025	LDENSAFLQFNWK		109.63	806.398	1610.78	2	7.24726	133.8
	W5KTG2;A0A0P7V2T7;A0A0P7VEP4;A0A0R4IJ08;A0A0S7GKE8;A0A0S7GMT1;A0A0S7GQA6;A0A1A7WGD9;A0A1A7Z4A6;A0A1A8D2Q6;A0A1A8D8C3;A0A1A8GCR2;A0A1A8I584;A0A1A8KR84;A0A1A8MAY9;A0A1A8QC83;A0A1A8SFC1;A0A1A8UI02;A0A060XII9;A0A060XJX9;A0A087XQU7;A0A146Q523;A0A146Z4H1;A0A146Z4K2;A0A146Z4L3;A0A146Z4P1;A0A146Z5L2;A0A146Z6F5;A0A146Z650;F1R443;F1R446;G3Q393;G3Q398;H2MBY2;I3JZ89;I3JZ90;M4A8R0;Q566W8;W5KTF3;W5MFM2;W5MFP4	3.19093	1.85266	ALINADELANDVAGAEALLDR		107	718.709	2153.11	3	2.54416	185.541
	W5KTG2;A0A0D9SGF6;A0A0P7V2T7;A0A0P7VEP4;A0A0R4IJ08;A0A0S7GFS2;A0A0S7GFS3;A0A0S7GGW7;A0A0S7GI92;A0A0S7GKU3;A0A1A7WGD9;A0A1A7Z4A6;A0A1A8AIC9;A0A1A8DRB6;A0A1A8GCR2;A0A1A8KF62;A0A1A8MAY9;A0A1A8MXE6;A0A1A8QNY9;A0A1A8RNY5;A0A1A8SFC1;A0A1A8UI02;A0A060XII9;A0A060XJX9;A0A087XQU7;A0A146NIU7;A0A146Q523;A0A146Z4J7;A0A146Z4L3;A0A146Z4P1;A0A146Z6F5;A0A146Z650;C0PUV6;F1R443;F1R445;F1R446;F8K8N3;G3Q393;G3Q398;H2…	2.21306	2.37499	IEDLGAAMEEALILDNK		106.2	922.972	1843.93	2	5.60561	153.845
	W5KTG2;A0A1A7WGD9;A0A1A7Z4A6;A0A1A8D2Q6;A0A1A8GCR2;A0A1A8I584;A0A1A8KR84;A0A1A8MXE6;A0A1A8QNY9;A0A1A8SFC1;A0A060XII9;A0A060XJX9;W5KTF3	1042.5	684.201	EGALTNEEVGSDLEQVEVLQK		105.35	1144.07	2286.13	2	4.00149	109.237
	W5KTG2;A0A0D9SGF6;A0A0P7V2T7;A0A0P7VEP4;A0A0R4IJ08;A0A0S7GFS2;A0A0S7GFS3;A0A0S7GGW7;A0A0S7GI92;A0A0S7GKU3;A0A1A7WGD9;A0A1A7Z4A6;A0A1A8AIC9;A0A1A8DRB6;A0A1A8GCR2;A0A1A8KF62;A0A1A8MAY9;A0A1A8MXE6;A0A1A8QNY9;A0A1A8RNY5;A0A1A8SFC1;A0A1A8UI02;A0A060XII9;A0A060XJX9;A0A087XQU7;A0A146NIU7;A0A146Q523;A0A146Z4J7;A0A146Z4L3;A0A146Z4P1;A0A146Z6F5;A0A146Z650;C0PUV6;F1R443;F1R445;F1R446;F8K8N3;G3Q393;G3Q398;H2…	12.4474	0.768997	KIEDLGAAMEEALILDNK		99.23	658.351	1972.03	3	5.84731	152.693
	W5KTG2;A0A0D9SGF6;A0A0P7V2T7;A0A0P7VEP4;A0A0R4IJ08;A0A0S7GFR3;A0A0S7GFS2;A0A0S7GG64;A0A0S7GKU3;A0A0S7GLM7;A0A1A7WGD9;A0A1A7Z4A6;A0A1A8D2Q6;A0A1A8GCR2;A0A1A8I584;A0A1A8KR84;A0A1A8MXE6;A0A1A8QNY9;A0A1A8SFC1;A0A060XII9;A0A060XJX9;A0A146NIL5;A0A146NIU7;A0A146NJR6;A0A146Q523;A0A146Z4H1;A0A146Z4J7;A0A146Z4K2;A0A146Z4L3;A0A146Z4P1;A0A146Z5L2;A0A146Z6F5;A0A146Z650;F1R443;F1R446;G3Q393;G3Q398;H2UIB0;H2UIB…	1.03818	2427.31	QQVAPTDDETGKELVLALYDYQEK		96.33	918.458	2752.35	3	4.07101	131.026
	W5KTG2;A0A0D9SGF6;A0A0P7V2T7;A0A0R4IJ08;A0A0S7GFR3;A0A0S7GFS2;A0A0S7GG64;A0A0S7GKU3;A0A0S7GLM7;A0A1A7WGD9;A0A1A7Z4A6;A0A1A8D2Q6;A0A1A8D8C3;A0A1A8GCR2;A0A1A8I584;A0A1A8KR84;A0A1A8MAY9;A0A1A8RNY5;A0A1A8SFC1;A0A060XII9;A0A060XJX9;A0A087XQU7;F1R443;F1R446;G3Q393;G3Q398;H2MBY2;I3JZ89;I3JZ90;M4A8R0;Q13813;W5KTF3;W5MFM2;W5MFP4	1.03818	1.24516	RQDLEDSLQAQQYFADANEAESWMR		95.41	1001.12	3000.34	3	4.19052	134.37
	W5KTG2;A0A0R4IJ08;A0A0S7GFQ2;A0A0S7GFQ8;A0A0S7GFR3;A0A0S7GFS1;A0A0S7GFS2;A0A0S7GFS3;A0A0S7GG64;A0A0S7GGW2;A0A0S7GGW7;A0A0S7GI92;A0A0S7GKU3;A0A0S7GLM7;A0A0S7GLW5;A0A0S7GNH5;A0A1A7WGD9;A0A1A7Z4A6;A0A1A8AIC9;A0A1A8DRB6;A0A1A8GCR2;A0A1A8KF62;A0A1A8MAY9;A0A1A8MXE6;A0A1A8QNY9;A0A1A8RNY5;A0A1A8SFC1;A0A1A8UI02;A0A060XII9;A0A087XQU7;A0A146NIL5;A0A146NIU7;A0A146NJR6;A0A146Q523;A0A146Z4H1;A0A146Z4J7;A0A146Z…	1.47246	0.92686	GVIDTGNALIQR		93.15	628.853	1255.69	2	1.68535	71.0409
	W5KTG2;A0A0P7VEP4;A0A0S7GFQ8;A0A0S7GFR3;A0A0S7GFS1;A0A0S7GFS2;A0A0S7GFS3;A0A0S7GFT9;A0A0S7GG64;A0A0S7GGW2;A0A0S7GGW7;A0A0S7GKU3;A0A0S7GLM7;A0A0S7GNH5;A0A1A7WGD9;A0A1A7Z4A6;A0A1A8AIC9;A0A1A8DRB6;A0A1A8GCR2;A0A1A8KF62;A0A1A8MAY9;A0A1A8MXE6;A0A1A8QNY9;A0A1A8RNY5;A0A1A8SFC1;A0A1A8UI02;A0A060XII9;A0A060XJX9;A0A087XQU7;I3JZ89;I3JZ90;M4A8R0;W5KTF3	71.7992	2.98086	AGTFQAFEQFGQQLLAR		92.56	637.998	1910.97	3	6.14205	169.011
	W5KTG2;A0A0D9SGF6;A0A0P7V2T7;A0A0P7VEP4;A0A0R4IJ08;A0A1A7WGD9;A0A1A7Z4A6;A0A1A8D2Q6;A0A1A8D8C3;A0A1A8GCR2;A0A1A8I584;A0A1A8KR84;A0A1A8MAY9;A0A1A8QC83;A0A1A8SFC1;A0A1A8UI02;A0A060XII9;A0A060XJX9;A0A087XQU7;A0A146Q523;A0A146Z4H1;A0A146Z4J7;A0A146Z4K2;A0A146Z4L3;A0A146Z4P1;A0A146Z5L2;A0A146Z6F5;A0A146Z650;F1R443;F1R446;G3Q393;G3Q398;H2MBY2;H2UIA9;H2UIB0;H2UIB1;H3C0G3;H3CBT9;I3JZ89;I3JZ90;M4A8R0;Q4T9…	1.02938	1.07542	HQAFEAELSANQSR		92.43	529.923	1586.75	3	4.18109	40.423
	W5KTG2;A0A0D9SFH4;A0A0D9SGF6;A0A0P7V2T7;A0A0P7VEP4;A0A0R4IJ08;A0A0S7GFS2;A0A0S7GFS3;A0A0S7GGW7;A0A0S7GI92;A0A0S7GKU3;A0A1A7WGD9;A0A1A7Z4A6;A0A1A8AIC9;A0A1A8DRB6;A0A1A8GCR2;A0A1A8KF62;A0A1A8MAY9;A0A1A8MXE6;A0A1A8QNY9;A0A1A8RNY5;A0A1A8SFC1;A0A1A8UI02;A0A060XII9;A0A060XJX9;A0A087XQU7;A0A146NIU7;A0A146Q523;A0A146Z4J7;A0A146Z4L3;A0A146Z4P1;A0A146Z650;C0PUV6;F1R443;F1R445;F1R446;F8K8N3;G3Q393;G3Q398;H2…	1.80805	0.865306	SSEEIESAFR		88.75	577.771	1153.53	2	-1.61916	51.3788
	W5KTG2;A0A0P7VEP4;A0A0R4IJ08;A0A0S7GFS1;A0A0S7GFS2;A0A0S7GFS3;A0A0S7GG64;A0A0S7GGW2;A0A0S7GGW7;A0A0S7GI92;A0A0S7GKU3;A0A0S7GLM7;A0A0S7GLW5;A0A1A7WGD9;A0A1A7Z4A6;A0A1A8AIC9;A0A1A8DRB6;A0A1A8GCR2;A0A1A8KF62;A0A1A8MAY9;A0A1A8MXE6;A0A1A8QNY9;A0A1A8RNY5;A0A1A8SFC1;A0A1A8UI02;A0A060XII9;A0A060XJX9;A0A087XQU7;A0A146NIL5;A0A146NIU7;A0A146NJR6;A0A146Q523;A0A146Z4J7;A0A146Z4K2;A0A146Z4L3;A0A146Z4P1;A0A146Z…	145.971	0.577478	QETFDAGLQAFQQEGITNITALK		88.67	841.766	2522.28	3	3.03161	153.268
	W5KTG2;A0A0R4IJ08;A0A060XII9;A0A060XJX9;F1R443;F1R446;W5KTF3	2.25083	1.26027	ENLLDEQGSIGLR		87.54	722.375	1442.74	2	-2.74321	85.0251
	W5KTG2;A0A0D9SGF6;A0A0P7VEP4;A0A0R4IJ08;A0A0S7GFS2;A0A0S7GFS3;A0A0S7GGW7;A0A0S7GI92;A0A0S7GKU3;A0A1A7WGD9;A0A1A7Z4A6;A0A1A8AIC9;A0A1A8DRB6;A0A1A8GCR2;A0A1A8KF62;A0A1A8MAY9;A0A1A8MXE6;A0A1A8QNY9;A0A1A8RNY5;A0A1A8SFC1;A0A1A8UI02;A0A060XII9;A0A060XJX9;A0A087XQU7;A0A146NIU7;A0A146Q523;A0A146Z4J7;A0A146Z4L3;A0A146Z4P1;A0A146Z6F5;A0A146Z650;C0PUV6;F1R443;F1R445;F1R446;F8K8N3;G3Q393;G3Q398;H2MBY2;H2UGD2…	0.233289	0.00119199	YTEHSTVGLAQQWDQLDQLGMR		87.43	859.415	2575.22	3	5.41344	132.586
	W5KTG2;A0A0D9SGF6;A0A0P7VEP4;A0A0R4IJ08;A0A060XII9;A0A060XJX9;F1R443;F1R446;G3Q393;G3Q398;H2UIA9;H2UIB0;H2UIB1;H3C0G3;H3CBT9;I3JZ89;I3JZ90;Q4T9R4;Q4T9R5;Q566W8;Q13813;W5KTF3;W5MFM2;W5MFP4	1.14844	0.843343	LFGAAEVQR		87	495.772	989.53	2	0.100762	47.4206
	W5KTG2;A0A0D9SGF6;A0A0P7V2T7;A0A0R4IJ08;A0A1A7WGD9;A0A1A7Z4A6;A0A1A8D2Q6;A0A1A8GCR2;A0A1A8I584;A0A1A8KR84;A0A1A8MXE6;A0A1A8QNY9;A0A1A8SFC1;A0A060XII9;A0A060XJX9;F1R443;F1R446;G3Q393;G3Q398;Q13813;W5KTF3	1.54542	1.00188	EANELQQWINEK		84.85	751.369	1500.72	2	1.77925	86.718
	W5KTG2;A0A0D9SGF6;A0A0P7VEP4;A0A0R4IJ08;A0A0S7GFQ8;A0A0S7GFR3;A0A0S7GFS1;A0A0S7GFS2;A0A0S7GFS3;A0A0S7GFT9;A0A0S7GG64;A0A0S7GGW2;A0A0S7GGW7;A0A0S7GKU3;A0A0S7GLM7;A0A0S7GNH5;A0A1A7WGD9;A0A1A7Z4A6;A0A1A8AIC9;A0A1A8DRB6;A0A1A8GCR2;A0A1A8KF62;A0A1A8MAY9;A0A1A8MXE6;A0A1A8QNY9;A0A1A8RNY5;A0A1A8SFC1;A0A1A8UI02;A0A060XII9;A0A060XJX9;A0A087XQU7;A0A146NIL5;A0A146NIU7;A0A146NJR6;A0A146Q523;A0A146Z4H1;A0A146Z…	639.152	1.0256	DCEQAENWMAAR	[2] Methylthio (C)	84.18	735.286	1468.56	2	4.578	79.8609
	W5KTG2;A0A0R4IJ08;A0A0S7GFR3;A0A0S7GFS2;A0A0S7GG64;A0A0S7GKU3;A0A0S7GLM7;A0A1A7WGD9;A0A1A7Z4A6;A0A1A8D2Q6;A0A1A8D8C3;A0A1A8GCR2;A0A1A8I584;A0A1A8KR84;A0A1A8QNY9;A0A1A8SFC1;A0A060XII9;A0A060XJX9;A0A087XQU7;A0A146NIL5;A0A146NIU7;A0A146NJR6;A0A146Q523;A0A146Z4H1;A0A146Z4J7;A0A146Z4K2;A0A146Z4L3;A0A146Z4P1;A0A146Z5L2;A0A146Z6F5;A0A146Z650;F1R443;F1R446;H2UIA9;H2UIB0;H2UIB1;M4A8R0;W5KTF3	1.21813	0.849124	EKEPIVGSPDYGKDEDSAEALLK		83.57	623.313	2489.22	4	0.933673	82.5533
	W5KTG2;A0A0D9SGF6;A0A0P7V2T7;A0A0R4IJ08;A0A0S7GFR3;A0A0S7GFS1;A0A0S7GFS2;A0A0S7GFS3;A0A0S7GG64;A0A0S7GGW2;A0A0S7GGW7;A0A0S7GKU3;A0A0S7GLM7;A0A0S7GNH5;A0A1A7WGD9;A0A1A7Z4A6;A0A1A8AIC9;A0A1A8DRB6;A0A1A8GCR2;A0A1A8MAY9;A0A1A8MXE6;A0A1A8QNY9;A0A1A8RNY5;A0A1A8SFC1;A0A1A8UI02;A0A060XII9;A0A060XJX9;A0A087XQU7;A0A146NIL5;A0A146NIU7;A0A146NJR6;A0A146Q523;A0A146Z4H1;A0A146Z4J7;A0A146Z4K2;A0A146Z4L3;A0A146Z…	342.749	49.8991	DADETKEWIEEK		83.48	746.846	1491.68	2	5.32486	44.8114
	W5KTG2;A0A0D9SGF6;A0A0P7V2T7;A0A0P7VEP4;A0A0R4IJ08;A0A0S7GFQ8;A0A0S7GFR3;A0A0S7GFS1;A0A0S7GFS2;A0A0S7GFS3;A0A0S7GFT9;A0A0S7GG64;A0A0S7GGW2;A0A0S7GGW7;A0A0S7GKU3;A0A0S7GLM7;A0A0S7GNH5;A0A1A7WGD9;A0A1A7Z4A6;A0A1A8AIC9;A0A1A8DRB6;A0A1A8GCR2;A0A1A8KF62;A0A1A8MAY9;A0A1A8MXE6;A0A1A8QNY9;A0A1A8RNY5;A0A1A8SFC1;A0A1A8UI02;A0A060XII9;A0A060XJX9;A0A087XQU7;A0A146NIL5;A0A146NIU7;A0A146NJR6;A0A146Q523;A0A146Z…	1.58256	1.52869	DVTGAEALLER		82.72	587.31	1172.6	2	3.83635	77.9559
	W5KTG2;A0A0D9SGF6;A0A0P7V2T7;A0A0P7VEP4;A0A0R4IJ08;A0A1A7WGD9;A0A1A7Z4A6;A0A1A8D2Q6;A0A1A8D8C3;A0A1A8GCR2;A0A1A8I584;A0A1A8KR84;A0A1A8MAY9;A0A1A8QC83;A0A1A8SFC1;A0A1A8UI02;A0A060XII9;A0A060XJX9;A0A087XQU7;A0A146Q523;A0A146Z4H1;A0A146Z4J7;A0A146Z4K2;A0A146Z4L3;A0A146Z4P1;A0A146Z5L2;A0A146Z6F5;A0A146Z650;F1R443;F1R446;G3Q393;G3Q398;H2MBY2;H2UIA9;H2UIB0;H2UIB1;H3C0G3;H3CBT9;I3JZ89;I3JZ90;M4A8R0;Q4T9…	1.36222	1.05396	HQAFEAELSANQSR		82.34	794.38	1586.75	2	3.32603	40.4952
	W5KTG2;A0A0D9SGF6;A0A0P7V2T7;A0A0P7VEP4;A0A0R4IJ08;A0A0S7GKE8;A0A0S7GMT1;A0A0S7GQA6;A0A1A7WGD9;A0A1A7Z4A6;A0A1A8D2Q6;A0A1A8D8C3;A0A1A8GCR2;A0A1A8I584;A0A1A8KR84;A0A1A8MAY9;A0A1A8QC83;A0A1A8SFC1;A0A1A8UI02;A0A060XII9;A0A060XJX9;A0A087XQU7;A0A146Q523;A0A146Z4H1;A0A146Z4K2;A0A146Z4L3;A0A146Z4P1;A0A146Z5L2;A0A146Z6F5;F1R443;F1R446;G3Q393;G3Q398;H2MBY2;H2UIA9;H2UIB0;H2UIB1;H3C0G3;H3CBT9;I3JZ89;I3JZ90;…	13.9598	12.7181	DLASVQALLR		82.27	543.319	1084.62	2	4.01573	111.985
	W5KTG2;A0A0R4IJ08;A0A0S7GFS1;A0A0S7GFS2;A0A0S7GFS3;A0A0S7GG64;A0A0S7GGW2;A0A0S7GGW7;A0A0S7GI92;A0A0S7GKU3;A0A0S7GLM7;A0A0S7GLW5;A0A1A7WGD9;A0A1A7Z4A6;A0A1A8AIC9;A0A1A8DRB6;A0A1A8GCR2;A0A1A8KF62;A0A1A8MAY9;A0A1A8MXE6;A0A1A8QNY9;A0A1A8RNY5;A0A1A8SFC1;A0A1A8UI02;A0A060XII9;A0A060XJX9;A0A087XQU7;A0A146NIL5;A0A146NIU7;A0A146NJR6;A0A146Q523;A0A146Z4J7;A0A146Z4L3;A0A146Z4P1;A0A146Z6F5;A0A146Z650;C0PUV6;…	0.00243808	1.43642	QETFDAGLQAFQQEGITNITALKDQLLAAK		81.55	1088.24	3261.69	3	0.395662	190.428
	W5KTG2;A0A0R4IJ08;A0A0S7GKE8;A0A0S7GKV9;A0A0S7GQU7;A0A1A8D2Q6;A0A1A8D8C3;A0A1A8GCR2;A0A1A8I584;A0A1A8KR84;A0A1A8MAY9;A0A1A8QC83;A0A1A8SFC1;A0A1A8UI02;A0A060XII9;A0A060XJX9;A0A087XQU7;A0A146Z4H1;A0A146Z4K2;A0A146Z4L3;A0A146Z4P1;A0A146Z5L2;A0A146Z6F5;F1R443;F1R446;G3Q393;G3Q398;H2MBY2;I3JZ89;I3JZ90;M4A8R0;Q32P38;Q566W8;W5KTF3;W5MFM2;W5MFP4	3.59038	0.31157	DADELEKWIQEK		80.79	752.37	1502.73	2	-2.72521	95.8845
	W5KTG2;A0A0D9SGF6;A0A0P7V2T7;A0A0P7VEP4;A0A0R4IJ08;A0A0S7GFS1;A0A0S7GFS2;A0A0S7GFS3;A0A0S7GG64;A0A0S7GGW2;A0A0S7GGW7;A0A0S7GI92;A0A0S7GKU3;A0A0S7GLM7;A0A0S7GLW5;A0A1A7WGD9;A0A1A7Z4A6;A0A1A8AIC9;A0A1A8DRB6;A0A1A8GCR2;A0A1A8KF62;A0A1A8MAY9;A0A1A8MXE6;A0A1A8QNY9;A0A1A8RNY5;A0A1A8SFC1;A0A1A8UI02;A0A060XII9;A0A060XJX9;A0A087XQU7;A0A146NIL5;A0A146NIU7;A0A146NJR6;A0A146Q523;A0A146Z4J7;A0A146Z4K2;A0A146Z…	3.42187	0.776863	ADVVESWIGEK		80.45	616.814	1231.61	2	3.30561	81.7777
	W5KTG2;A0A0S7GFS2;A0A0S7GFS3;A0A0S7GGW7;A0A0S7GI92;A0A0S7GKU3;A0A1A7WGD9;A0A1A7Z4A6;A0A1A8AIC9;A0A1A8DRB6;A0A1A8GCR2;A0A1A8KF62;A0A1A8MAY9;A0A1A8MXE6;A0A1A8QNY9;A0A1A8RNY5;A0A1A8SFC1;A0A1A8UI02;A0A060XII9;A0A060XJX9;A0A146NIU7;A0A146Q523;A0A146Z4J7;A0A146Z4L3;A0A146Z4P1;A0A146Z6F5;A0A146Z650;C0PUV6;F1R446;G3Q393;G3Q398;H2MBY2;H3C0G3;H3CBT9;I3JZ89;Q13813;W5MFM2	3.63141	5.60988	TYLLDGSCMVEESGTLESQLEATKR	[8] Methylthio (C)	79.79	936.109	2805.3	3	4.90607	152.98
	W5KTG2;A0A0D9SGF6;A0A0P7V2T7;A0A0P7VEP4;A0A0R4IJ08;A0A0S7GKE8;A0A0S7GMT1;A0A0S7GQA6;A0A1A7WGD9;A0A1A7Z4A6;A0A1A8D2Q6;A0A1A8D8C3;A0A1A8GCR2;A0A1A8I584;A0A1A8KR84;A0A1A8MAY9;A0A1A8QC83;A0A1A8SFC1;A0A1A8UI02;A0A060XII9;A0A060XJX9;A0A087XQU7;A0A146Q523;A0A146Z4H1;A0A146Z4K2;A0A146Z4L3;A0A146Z4P1;A0A146Z5L2;A0A146Z6F5;A0A146Z650;F1R443;F1R446;G3Q393;G3Q398;H2MBY2;H2UIA9;H2UIB0;H2UIB1;H3C0G3;H3CBT9;I3J…	4.51153	0.892071	DTEQVDNWMSK		79.45	676.796	1351.58	2	5.05027	55.3468
	W5KTG2;A0A1A7WGD9;A0A1A7Z4A6;A0A1A8D2Q6;A0A1A8GCR2;A0A1A8I584;A0A1A8KR84;A0A1A8MXE6;A0A1A8QNY9;A0A1A8SFC1;A0A060XII9;A0A060XJX9;W5KTF3	4.24954	2.61477	EGALTNEEVGSDLEQVEVLQK		79.15	763.052	2286.13	3	6.33243	109.237
	W5KTG2;A0A0R4IJ08;A0A0S7GFS1;A0A0S7GFS2;A0A0S7GFS3;A0A0S7GG64;A0A0S7GGW2;A0A0S7GGW7;A0A0S7GI92;A0A0S7GKU3;A0A0S7GLM7;A0A0S7GLW5;A0A1A7WGD9;A0A1A7Z4A6;A0A1A8AIC9;A0A1A8DRB6;A0A1A8GCR2;A0A1A8KF62;A0A1A8MAY9;A0A1A8MXE6;A0A1A8QNY9;A0A1A8RNY5;A0A1A8SFC1;A0A1A8UI02;A0A060XII9;A0A060XJX9;A0A087XQU7;A0A146NIL5;A0A146NIU7;A0A146NJR6;A0A146Q523;A0A146Z4J7;A0A146Z4L3;A0A146Z4P1;A0A146Z6F5;A0A146Z650;C0PUV6;…	1158.65	1.01947	QETFDAGLQAFQQEGITNITALKDQLLAAK		78.96	816.434	3261.71	4	4.85996	190.921
	W5KTG2;A0A0R4IJ08;A0A0S7GFS1;A0A0S7GFS2;A0A0S7GFS3;A0A0S7GG64;A0A0S7GGW2;A0A0S7GGW7;A0A0S7GI92;A0A0S7GKU3;A0A0S7GLM7;A0A0S7GLW5;A0A1A7WGD9;A0A1A7Z4A6;A0A1A8AIC9;A0A1A8DRB6;A0A1A8GCR2;A0A1A8KF62;A0A1A8MAY9;A0A1A8MXE6;A0A1A8QNY9;A0A1A8RNY5;A0A1A8SFC1;A0A1A8UI02;A0A060XII9;A0A060XJX9;A0A087XQU7;A0A146NIL5;A0A146NIU7;A0A146NJR6;A0A146Q523;A0A146Z4J7;A0A146Z4L3;A0A146Z4P1;A0A146Z6F5;A0A146Z650;C0PUV6;…	176.05	1.01947	QETFDAGLQAFQQEGITNITALKDQLLAAK	[N-term] Gln->pyro-Glu (N-term Q)	77.51	1082.57	3244.68	3	4.79505	192.126
	W5KTG2;A0A0P7VEP4;A0A0R4IJ08;A0A0S7GKQ9;A0A0S7GMT1;A0A0S7GRJ6;A0A1A7WGD9;A0A1A7Z4A6;A0A1A8D2Q6;A0A1A8D8C3;A0A1A8GCR2;A0A1A8I584;A0A1A8KR84;A0A1A8MAY9;A0A1A8QC83;A0A1A8SFC1;A0A1A8UI02;A0A060XII9;A0A087XQU7;A0A146Q523;A0A146Z4H1;A0A146Z4K2;A0A146Z4L3;A0A146Z4P1;A0A146Z5L2;A0A146Z6F5;A0A146Z650;F1R443;F1R446;G3Q393;G3Q398;H2UIA9;H2UIB0;H2UIB1;H3C0G3;H3CBT9;I3JZ89;I3JZ90;M4A8R0;Q4T9R4;Q4T9R5;W5KTF3;W…	1.19251	1.01947	RAALEDSFHLQQFFR		77.08	622.323	1863.95	3	3.76403	124.952
	W5KTG2;A0A0R4IJ08;A0A0S7GFR3;A0A0S7GFS3;A0A0S7GG64;A0A0S7GGW2;A0A0S7GKU3;A0A0S7GNH5;A0A1A7WGD9;A0A1A7Z4A6;A0A1A8AIC9;A0A1A8DRB6;A0A1A8GCR2;A0A1A8KF62;A0A1A8MAY9;A0A1A8MXE6;A0A1A8QNY9;A0A1A8RNY5;A0A1A8SFC1;A0A1A8UI02;A0A060XII9;A0A060XJX9;A0A087XQU7;A0A146NIL5;A0A146NIU7;A0A146NJR6;A0A146Z4H1;A0A146Z4P1;F1R446;G3Q398;H2MBY2;H2UIB0;I3JZ89;M4A8R0;W5KTF3;W5MFM2;W5MFP4	1.81363	0.890157	LQTATDESYKDPTNIQLSK		77.03	718.032	2151.07	3	1.28737	63.1219
	W5KTG2;A0A0D9SGF6;A0A0P7V2T7;A0A0P7VEP4;A0A0R4IJ08;A0A0S7GFS1;A0A0S7GFS2;A0A0S7GFS3;A0A0S7GG64;A0A0S7GGW2;A0A0S7GGW7;A0A0S7GI92;A0A0S7GKU3;A0A0S7GLM7;A0A0S7GLW5;A0A1A7WGD9;A0A1A7Z4A6;A0A1A8AIC9;A0A1A8DRB6;A0A1A8GCR2;A0A1A8KF62;A0A1A8MAY9;A0A1A8MXE6;A0A1A8QNY9;A0A1A8RNY5;A0A1A8SFC1;A0A1A8UI02;A0A060XII9;A0A060XJX9;A0A087XQU7;A0A146NIL5;A0A146NIU7;A0A146NJR6;A0A146Q523;A0A146Z4J7;A0A146Z4K2;A0A146Z…	1.51824	0.852764	DLSSVQTLLTK		76.54	602.844	1203.67	2	2.8522	99.131
	W5KTG2;A0A060XII9;A0A060XJX9;W5KTF3	1.11943	0.980359	DLAALEDKVNTLGGEAER		75.98	634.326	1899.95	3	2.5623	100.048
	W5KTG2;A0A0P7VEP4;A0A0R4IJ08;A0A0S7GKQ9;A0A0S7GMT1;A0A0S7GRJ6;A0A1A7WGD9;A0A1A7Z4A6;A0A1A8D2Q6;A0A1A8D8C3;A0A1A8GCR2;A0A1A8I584;A0A1A8KR84;A0A1A8MAY9;A0A1A8QC83;A0A1A8SFC1;A0A1A8UI02;A0A060XII9;A0A060XJX9;A0A087XQU7;A0A146Q523;A0A146Z4H1;A0A146Z4K2;A0A146Z4L3;A0A146Z4P1;A0A146Z5L2;A0A146Z6F5;A0A146Z650;F1R443;F1R446;G3Q393;G3Q398;H2MBY2;H2UIA9;H2UIB0;H2UIB1;H3C0G3;H3CBT9;I3JZ89;I3JZ90;M4A8R0;Q4T9…	1.13379	1.01947	DSDELKSWINEK		75.04	732.356	1462.7	2	5.36109	70.5467
	W5KTG2;A0A0D9SGF6;A0A0P7V2T7;A0A0P7VEP4;A0A0R4IJ08;A0A0S7GFS1;A0A0S7GFS2;A0A0S7GFS3;A0A0S7GG64;A0A0S7GGW2;A0A0S7GGW7;A0A0S7GI92;A0A0S7GKU3;A0A0S7GLM7;A0A0S7GLW5;A0A1A7WGD9;A0A1A7Z4A6;A0A1A8AIC9;A0A1A8DRB6;A0A1A8GCR2;A0A1A8KF62;A0A1A8MAY9;A0A1A8MXE6;A0A1A8QNY9;A0A1A8RNY5;A0A1A8SFC1;A0A1A8UI02;A0A060XII9;A0A060XJX9;A0A087XQU7;A0A146NIL5;A0A146NIU7;A0A146NJR6;A0A146Q523;A0A146Z4J7;A0A146Z4K2;A0A146Z…	1.03818	0.845309	ASAFNSWFENAEEDLTDPVR		74.24	1149.52	2297.03	2	4.16893	161.833
	W5KTG2;A0A0D9SGF6;A0A0P7VEP4;A0A0R4IJ08;A0A0S7GFR3;A0A0S7GFS2;A0A0S7GG64;A0A0S7GKU3;A0A0S7GLM7;A0A1A7WGD9;A0A1A7Z4A6;A0A1A8D2Q6;A0A1A8GCR2;A0A1A8I584;A0A1A8KR84;A0A1A8MXE6;A0A1A8QNY9;A0A1A8SFC1;A0A060XII9;A0A146NIL5;A0A146NIU7;A0A146NJR6;A0A146Q523;A0A146Z4H1;A0A146Z4J7;A0A146Z4K2;A0A146Z4L3;A0A146Z4P1;A0A146Z5L2;A0A146Z6F5;A0A146Z650;F1R443;F1R446;G3Q393;G3Q398;H2MBY2;H2UIA9;H2UIB0;H2UIB1;H3C0G3…	9.89134	42.8179	KGDILTLLNSTNKDWWK		73.99	678.035	2031.08	3	1.34542	153.628
	W5KTG2;A0A0D9SGF6;A0A0P7VEP4;A0A0R4IJ08;A0A0S7GKE8;A0A0S7GMT1;A0A0S7GQA6;A0A1A7WGD9;A0A1A7Z4A6;A0A1A8D2Q6;A0A1A8D8C3;A0A1A8GCR2;A0A1A8I584;A0A1A8KR84;A0A1A8MAY9;A0A1A8QC83;A0A1A8SFC1;A0A1A8UI02;A0A060XII9;A0A060XJX9;A0A087XQU7;A0A146Q523;A0A146Z4H1;A0A146Z4K2;A0A146Z4L3;A0A146Z4P1;A0A146Z5L2;A0A146Z6F5;A0A146Z650;F1R443;F1R446;G3Q393;G3Q398;I3JZ89;I3JZ90;M4A8R0;Q566W8;Q13813;W5KTF3;W5MFM2;W5MFP4	2.07143	0.191413	DLTSWVTEMK		73.73	605.296	1208.58	2	6.47796	114.66
	W5KTG2;A0A0D9SGF6;A0A0P7V2T7;A0A0R4IJ08;A0A060XJX9;A0A146Q523;A0A146Z4H1;A0A146Z4J7;A0A146Z4K2;A0A146Z4L3;A0A146Z4P1;A0A146Z5L2;A0A146Z6F5;A0A146Z650;F1QDX2;F1R443;F1R446;G3Q393;G3Q398;H2MBY2;H3C0G3;H3CBT9;I3JZ89;I3JZ90;Q4T9R4;Q4T9R5;Q13813;W5KTF3;W5MFM2;W5MFP4	1.34405	1.11579	DLAALGDKVNSLGETAER		73.23	620.321	1857.94	3	0.633634	86.0829
	W5KTG2;A0A060XII9;A0A060XJX9;G3Q393;G3Q398;I3JZ89;I3JZ90;W5KTF3	0.123332	250.724	SGQELIDGK		71.5	473.745	945.476	2	-3.85457	25.547
	W5KTG2;A0A0R4IJ08;A0A0S7GFQ8;A0A0S7GFR3;A0A0S7GFS1;A0A0S7GFS2;A0A0S7GFS3;A0A0S7GFT9;A0A0S7GG64;A0A0S7GGW2;A0A0S7GGW7;A0A0S7GKU3;A0A0S7GLM7;A0A0S7GNH5;A0A1A7WGD9;A0A1A7Z4A6;A0A1A8AIC9;A0A1A8DRB6;A0A1A8GCR2;A0A1A8KF62;A0A1A8MAY9;A0A1A8MXE6;A0A1A8QNY9;A0A1A8RNY5;A0A1A8SFC1;A0A1A8UI02;A0A060XII9;A0A060XJX9;A0A087XQU7;A0A146NIL5;A0A146NIU7;A0A146NJR6;A0A146Q523;A0A146Z4H1;A0A146Z4J7;A0A146Z4K2;A0A146Z…	1.2166	0.487952	EAFLASDDKGDSLDSVEALIK		71.06	741.709	2222.11	3	2.41343	138.153
	W5KTG2;A0A0D9SGF6;A0A0P7V2T7;A0A0P7VEP4;A0A0R4IJ08;A0A0S7GFS2;A0A0S7GFS3;A0A0S7GGW7;A0A0S7GI92;A0A0S7GKU3;A0A1A7WGD9;A0A1A7Z4A6;A0A1A8AIC9;A0A1A8DRB6;A0A1A8GCR2;A0A1A8KF62;A0A1A8MAY9;A0A1A8MXE6;A0A1A8QNY9;A0A1A8RNY5;A0A1A8SFC1;A0A1A8UI02;A0A060XII9;A0A060XJX9;A0A087XQU7;A0A146NIU7;A0A146Q523;A0A146Z4J7;A0A146Z4L3;A0A146Z4P1;A0A146Z6F5;A0A146Z650;C0PUV6;F1R443;F1R445;F1R446;F8K8N3;G3Q393;G3Q398;H2…	748.413	24.6248	KIEDLGAAMEEALILDNK		70.83	987.022	1972.03	2	5.20131	152.693
	W5KTG2;A0A0D9SGF6;A0A0P7V2T7;A0A0P7VEP4;A0A0R4IJ08;A0A0S7GFR3;A0A0S7GFS2;A0A0S7GG64;A0A0S7GKU3;A0A0S7GLM7;A0A1A7WGD9;A0A1A7Z4A6;A0A1A8D2Q6;A0A1A8GCR2;A0A1A8I584;A0A1A8KR84;A0A1A8MAY9;A0A1A8SFC1;A0A060XII9;A0A060XJX9;A0A087XQU7;A0A146NIL5;A0A146NIU7;A0A146NJR6;A0A146Q523;A0A146Z4H1;A0A146Z4J7;A0A146Z4L3;A0A146Z4P1;A0A146Z5L2;A0A146Z6F5;A0A146Z650;F1R443;F1R446;G3Q393;G3Q398;H2MBY2;H2UIA9;H2UIB0;H2…	0.646554	0.72502	GKDLIGVQNLLK		69.7	649.397	1296.78	2	-1.08841	96.0961
	W5KTG2;A0A0P7VEP4;A0A0R4IJ08;A0A060XII9;A0A060XJX9;F1R443;F1R446;G3Q393;G3Q398;H2UIA9;H2UIB0;H2UIB1;H3C0G3;H3CBT9;I3JZ89;I3JZ90;Q4T9R4;W5KTF3;W5MFM2;W5MFP4	0.109469	1.64738	LLVSSEDYGR		68.99	569.792	1137.57	2	-0.811243	46.0808
	W5KTG2;A0A0P7VEP4;A0A060XII9;A0A060XJX9;W5KTF3;W5MFM2;W5MFP4	1.25631	0.999104	RDELITNWEQIR		68.21	786.911	1571.81	2	-1.88631	87.0717
	W5KTG2;A0A0R4IJ08;A0A0S7GFR3;A0A0S7GFS2;A0A0S7GG64;A0A0S7GKU3;A0A0S7GLM7;A0A1A7WGD9;A0A1A7Z4A6;A0A1A8D2Q6;A0A1A8D8C3;A0A1A8GCR2;A0A1A8I584;A0A1A8KR84;A0A1A8QNY9;A0A1A8SFC1;A0A060XII9;A0A060XJX9;A0A087XQU7;A0A146NIL5;A0A146NIU7;A0A146NJR6;A0A146Q523;A0A146Z4H1;A0A146Z4J7;A0A146Z4K2;A0A146Z4L3;A0A146Z4P1;A0A146Z5L2;A0A146Z6F5;A0A146Z650;F1R443;F1R446;H2UIA9;H2UIB0;H2UIB1;M4A8R0;W5KTF3	1.86448	25.3728	EKEPIVGSPDYGKDEDSAEALLK		67.62	830.747	2489.22	3	-0.0692612	82.4828
	W5KTG2;A0A0D9SGF6;A0A0P7V2T7;A0A0P7VEP4;A0A0R4IJ08;A0A060XII9;A0A060XJX9;F1R443;F1R446;G3Q393;G3Q398;H2UIA9;H2UIB0;H2UIB1;H3C0G3;H3CBT9;I3JZ89;I3JZ90;Q4T9R4;Q4T9R5;Q13813;W5KTF3;W5MFM2;W5MFP4	0.996473	0.855391	TATDEAYKDPSNLQGK		67.48	579.948	1736.82	3	2.06475	28.4351
	W5KTG2;A0A0D9SGF6;A0A0P7VEP4;A0A0R4IJ08;A0A0S7GFR3;A0A0S7GFS1;A0A0S7GFS2;A0A0S7GFS3;A0A0S7GG64;A0A0S7GGW2;A0A0S7GGW7;A0A0S7GKU3;A0A0S7GLM7;A0A0S7GNH5;A0A1A7WGD9;A0A1A7Z4A6;A0A1A8AIC9;A0A1A8DRB6;A0A1A8GCR2;A0A1A8KF62;A0A1A8MAY9;A0A1A8MXE6;A0A1A8QNY9;A0A1A8RNY5;A0A1A8SFC1;A0A1A8UI02;A0A060XII9;A0A060XJX9;A0A087XQU7;A0A146NIL5;A0A146NIU7;A0A146NJR6;A0A146Q523;A0A146Z4H1;A0A146Z4J7;A0A146Z4K2;A0A146Z…	1.68847	1.87492	DLMSWINGIR		67.46	602.812	1203.61	2	-0.298836	155.21
	W5KTG2;A0A0D9SGF6;A0A0P7V2T7;A0A0P7VEP4;A0A0R4IJ08;A0A0S7GFS1;A0A0S7GFS2;A0A0S7GFS3;A0A0S7GG64;A0A0S7GGW2;A0A0S7GGW7;A0A0S7GI92;A0A0S7GKU3;A0A0S7GLM7;A0A0S7GLW5;A0A1A7WGD9;A0A1A7Z4A6;A0A1A8AIC9;A0A1A8DRB6;A0A1A8GCR2;A0A1A8KF62;A0A1A8MAY9;A0A1A8MXE6;A0A1A8QNY9;A0A1A8RNY5;A0A1A8SFC1;A0A1A8UI02;A0A060XII9;A0A060XJX9;A0A087XQU7;A0A146NIL5;A0A146NIU7;A0A146NJR6;A0A146Q523;A0A146Z4J7;A0A146Z4K2;A0A146Z…	44.1651	0.424204	ASAFNSWFENAEEDLTDPVR		66.91	766.686	2297.04	3	6.9364	164.274
	W5KTG2;A0A1A7WGD9;A0A1A7Z4A6;A0A1A8AIC9;A0A1A8DRB6;A0A1A8GCR2;A0A1A8KF62;A0A1A8MAY9;A0A1A8MXE6;A0A1A8QNY9;A0A1A8RNY5;A0A1A8SFC1;A0A1A8UI02;A0A060XII9;A0A060XJX9;G3Q393;G3Q398;H2MBY2;H2UIA9;H2UIB0;H2UIB1;H3C0G3;H3CBT9;I3JZ89;I3JZ90;Q4T9R4;W5KTF3	1.11623	0.116383	GHYASPEIQQK		66.23	419.88	1256.62	3	6.94991	21.7151
	W5KTG2;A0A0D9SGF6;A0A0P7V2T7;A0A0P7VEP4;A0A0R4IJ08;A0A0S7GFR3;A0A0S7GFS2;A0A0S7GG64;A0A0S7GKU3;A0A0S7GLM7;A0A1A7WGD9;A0A1A7Z4A6;A0A1A8D2Q6;A0A1A8D8C3;A0A1A8GCR2;A0A1A8I584;A0A1A8KR84;A0A1A8MAY9;A0A1A8QC83;A0A1A8SFC1;A0A060XJX9;A0A087XQU7;A0A146NIL5;A0A146NIU7;A0A146NJR6;A0A146Q523;A0A146Z4H1;A0A146Z4J7;A0A146Z4K2;A0A146Z4L3;A0A146Z4P1;A0A146Z5L2;A0A146Z6F5;A0A146Z650;F1R443;F1R446;G3Q393;G3Q398;H…	1.77112	0.00401734	DVEDEETWIR		65.86	646.296	1290.58	2	5.49503	68.6247
	W5KTG2;A0A0P7VEP4;A0A0R4IJ08;A0A0S7GFS1;A0A0S7GFS2;A0A0S7GFS3;A0A0S7GG64;A0A0S7GGW2;A0A0S7GGW7;A0A0S7GI92;A0A0S7GKU3;A0A0S7GLM7;A0A0S7GLW5;A0A1A7WGD9;A0A1A7Z4A6;A0A1A8AIC9;A0A1A8DRB6;A0A1A8GCR2;A0A1A8KF62;A0A1A8MAY9;A0A1A8MXE6;A0A1A8QNY9;A0A1A8RNY5;A0A1A8SFC1;A0A1A8UI02;A0A060XII9;A0A060XJX9;A0A087XQU7;A0A146NIL5;A0A146NIU7;A0A146NJR6;A0A146Q523;A0A146Z4J7;A0A146Z4K2;A0A146Z4L3;A0A146Z4P1;A0A146Z…	357.792	2.6172	CNSLEEIR	[1] Methylthio (C)	65.69	505.229	1008.44	2	4.26409	42.7674
	W5KTG2;A0A0D9SGF6;A0A0P7V2T7;A0A0R4IJ08;A0A060XJX9;A0A146Q523;A0A146Z4H1;A0A146Z4J7;A0A146Z4K2;A0A146Z4L3;A0A146Z4P1;A0A146Z5L2;A0A146Z6F5;A0A146Z650;F1QDX2;F1R443;F1R446;G3Q393;G3Q398;H2MBY2;H3C0G3;H3CBT9;I3JZ89;I3JZ90;Q4T9R4;Q4T9R5;Q13813;W5KTF3;W5MFM2;W5MFP4	1.01779	0.0478746	VNSLGETAER		65.66	538.272	1074.53	2	-0.776137	20.515
	W5KTG2;A0A0D9SGF6;A0A0P7V2T7;A0A0P7VEP4;A0A0R4IJ08;A0A0S7GKQ9;A0A0S7GMT1;A0A0S7GRJ6;A0A1A7WGD9;A0A1A7Z4A6;A0A1A8D2Q6;A0A1A8D8C3;A0A1A8GCR2;A0A1A8I584;A0A1A8KR84;A0A1A8MAY9;A0A1A8QC83;A0A1A8SFC1;A0A1A8UI02;A0A060XII9;A0A060XJX9;A0A087XQU7;A0A146Q523;A0A146Z4H1;A0A146Z4K2;A0A146Z4L3;A0A146Z4P1;A0A146Z5L2;A0A146Z6F5;A0A146Z650;F1R443;F1R446;G3Q393;G3Q398;H2MBY2;H2UIA9;H2UIB0;H2UIB1;H3C0G3;H3CBT9;I3J…	0.821047	1.11662	ITALDEFATK		65	554.791	1107.57	2	-11.0637	72.3097
	W5KTG2;A0A0P7VEP4;A0A0R4IJ08;A0A0S7GFQ2;A0A0S7GFQ8;A0A0S7GFR3;A0A0S7GFS1;A0A0S7GFS2;A0A0S7GFS3;A0A0S7GG64;A0A0S7GGW2;A0A0S7GGW7;A0A0S7GI92;A0A0S7GKU3;A0A0S7GLM7;A0A0S7GLW5;A0A0S7GNH5;A0A1A7WGD9;A0A1A7Z4A6;A0A1A8AIC9;A0A1A8DRB6;A0A1A8GCR2;A0A1A8KF62;A0A1A8MAY9;A0A1A8MXE6;A0A1A8QNY9;A0A1A8RNY5;A0A1A8SFC1;A0A1A8UI02;A0A060XII9;A0A060XJX9;A0A087XQU7;A0A146NIL5;A0A146NIU7;A0A146NJR6;A0A146Q523;A0A146Z…	1.55949	1.01947	DLDDEESWIKEK		64.98	502.906	1505.7	3	3.79862	67.8497
	W5KTG2;A0A0D9SGF6;A0A0P7V2T7;A0A0P7VEP4;A0A0R4IJ08;A0A0S7GFS2;A0A0S7GFS3;A0A0S7GGW7;A0A0S7GI92;A0A0S7GKU3;A0A1A7WGD9;A0A1A7Z4A6;A0A1A8AIC9;A0A1A8DRB6;A0A1A8GCR2;A0A1A8KF62;A0A1A8MAY9;A0A1A8MXE6;A0A1A8QNY9;A0A1A8RNY5;A0A1A8SFC1;A0A1A8UI02;A0A060XII9;A0A060XJX9;A0A087XQU7;A0A146NIU7;A0A146Q523;A0A146Z4J7;A0A146Z4L3;A0A146Z4P1;A0A146Z6F5;A0A146Z650;C0PUV6;F1R443;F1R445;F1R446;F8K8N3;G3Q393;G3Q398;H2…	0.00150252	0.0161301	MQHNLEQQIQAR		63.72	499.254	1494.74	3	-0.210263	31.0477
	W5KTG2;A0A0P7VEP4;A0A0R4IJ08;A0A0S7GFR3;A0A0S7GFS1;A0A0S7GFS2;A0A0S7GFS3;A0A0S7GG64;A0A0S7GGW2;A0A0S7GGW7;A0A0S7GKU3;A0A0S7GLM7;A0A0S7GNH5;A0A1A7WGD9;A0A1A7Z4A6;A0A1A8AIC9;A0A1A8DRB6;A0A1A8GCR2;A0A1A8KF62;A0A1A8MAY9;A0A1A8MXE6;A0A1A8QNY9;A0A1A8RNY5;A0A1A8SFC1;A0A1A8UI02;A0A060XII9;A0A060XJX9;A0A087XQU7;A0A146NIL5;A0A146NIU7;A0A146NJR6;A0A146Q523;A0A146Z4H1;A0A146Z4J7;A0A146Z4K2;A0A146Z4L3;A0A146Z…	1.51961	32.2562	LIQSHPEAVDDIQEK		63.33	574.629	1720.86	3	2.61635	42.2722
	W5KTG2;A0A0P7V2T7;A0A0P7VEP4;A0A0R4IJ08;A0A0S7GKE8;A0A0S7GMT1;A0A0S7GQA6;A0A1A7WGD9;A0A1A7Z4A6;A0A1A8D2Q6;A0A1A8D8C3;A0A1A8GCR2;A0A1A8I584;A0A1A8KR84;A0A1A8MAY9;A0A1A8QC83;A0A1A8SFC1;A0A1A8UI02;A0A060XII9;A0A060XJX9;A0A087XQU7;A0A146Q523;A0A146Z4H1;A0A146Z4K2;A0A146Z4L3;A0A146Z4P1;A0A146Z5L2;A0A146Z6F5;A0A146Z650;F1R443;F1R446;G3Q393;G3Q398;H2MBY2;I3JZ89;I3JZ90;M4A8R0;Q566W8;W5KTF3;W5MFM2;W5MFP4	4.7557	1.01947	ALINADELANDVAGAEALLDR		63.3	1077.56	2153.1	2	2.01469	185.541
	W5KTG2;A0A0D9SGF6;A0A0P7VEP4;A0A0R4IJ08;A0A0S7GFR3;A0A0S7GFS2;A0A0S7GG64;A0A0S7GKU3;A0A0S7GLM7;A0A1A7WGD9;A0A1A7Z4A6;A0A1A8D2Q6;A0A1A8D8C3;A0A1A8GCR2;A0A1A8I584;A0A1A8KR84;A0A1A8MAY9;A0A1A8QC83;A0A1A8SFC1;A0A1A8UI02;A0A060XII9;A0A060XJX9;A0A087XQU7;A0A146NJR6;A0A146Q523;A0A146Z4H1;A0A146Z4J7;A0A146Z4K2;A0A146Z4L3;A0A146Z4P1;A0A146Z5L2;A0A146Z6F5;A0A146Z650;F1R443;F1R446;G3Q393;G3Q398;H2MBY2;H2UIA…	0.908829	0.475904	HALLEADVAAHQDR		62.69	515.936	1544.79	3	10.1322	40.423
	W5KTG2;A0A0R4IJ08;A0A0S7GFQ8;A0A0S7GFR3;A0A0S7GFS1;A0A0S7GFS2;A0A0S7GFS3;A0A0S7GFT9;A0A0S7GG64;A0A0S7GGW2;A0A0S7GGW7;A0A0S7GKU3;A0A0S7GLM7;A0A0S7GNH5;A0A1A7WGD9;A0A1A7Z4A6;A0A1A8AIC9;A0A1A8DRB6;A0A1A8GCR2;A0A1A8KF62;A0A1A8MAY9;A0A1A8MXE6;A0A1A8QNY9;A0A1A8RNY5;A0A1A8SFC1;A0A1A8UI02;A0A060XII9;A0A060XJX9;A0A087XQU7;A0A146NIL5;A0A146NIU7;A0A146NJR6;A0A146Q523;A0A146Z4H1;A0A146Z4J7;A0A146Z4K2;A0A146Z…	1.64574	1.01947	EAFLASDDKGDSLDSVEALIK		62.33	1112.06	2222.1	2	1.50482	138.153
	W5KTG2;A0A0D9SGF6;A0A0P7VEP4;A0A0R4IJ08;A0A0S7GFQ2;A0A0S7GFQ8;A0A0S7GFR3;A0A0S7GFS1;A0A0S7GFS2;A0A0S7GFS3;A0A0S7GG64;A0A0S7GGW2;A0A0S7GGW7;A0A0S7GI92;A0A0S7GKU3;A0A0S7GLM7;A0A0S7GLW5;A0A0S7GNH5;A0A1A7WGD9;A0A1A7Z4A6;A0A1A8AIC9;A0A1A8DRB6;A0A1A8GCR2;A0A1A8KF62;A0A1A8MAY9;A0A1A8MXE6;A0A1A8QNY9;A0A1A8RNY5;A0A1A8SFC1;A0A1A8UI02;A0A060XII9;A0A060XJX9;A0A087XQU7;A0A146NIL5;A0A146NIU7;A0A146NJR6;A0A146Q…	4.71858	1.01947	LEESLEYQQFVANVEEEEAWINEK		62.07	976.131	2925.37	3	4.07214	165.566
	W5KTG2;A0A0P7VEP4;A0A0R4IJ08;A0A0S7GKQ9;A0A0S7GMT1;A0A0S7GRJ6;A0A1A7WGD9;A0A1A7Z4A6;A0A1A8D2Q6;A0A1A8D8C3;A0A1A8GCR2;A0A1A8I584;A0A1A8KR84;A0A1A8MAY9;A0A1A8QC83;A0A1A8SFC1;A0A1A8UI02;A0A060XII9;A0A087XQU7;A0A146Q523;A0A146Z4H1;A0A146Z4K2;A0A146Z4L3;A0A146Z4P1;A0A146Z5L2;A0A146Z6F5;A0A146Z650;F1R443;F1R446;G3Q393;G3Q398;H2UIA9;H2UIB0;H2UIB1;H3C0G3;H3CBT9;I3JZ89;I3JZ90;M4A8R0;Q4T9R4;Q4T9R5;W5KTF3;W…	0.396837	0.831982	AALEDSFHLQQFFR		60.37	570.291	1707.85	3	6.80052	138.511
	W5KTG2;A0A0P7VEP4;A0A0R4IJ08;A0A0S7GFQ2;A0A0S7GFQ8;A0A0S7GFR3;A0A0S7GFS1;A0A0S7GFS2;A0A0S7GFS3;A0A0S7GG64;A0A0S7GGW2;A0A0S7GGW7;A0A0S7GI92;A0A0S7GKU3;A0A0S7GLM7;A0A0S7GLW5;A0A0S7GNH5;A0A1A7WGD9;A0A1A7Z4A6;A0A1A8AIC9;A0A1A8DRB6;A0A1A8GCR2;A0A1A8KF62;A0A1A8MAY9;A0A1A8MXE6;A0A1A8QNY9;A0A1A8RNY5;A0A1A8SFC1;A0A1A8UI02;A0A060XII9;A0A060XJX9;A0A087XQU7;A0A146NIL5;A0A146NIU7;A0A146NJR6;A0A146Q523;A0A146Z…	7.88007	0.0992557	DLDDEESWIK		60.1	625.285	1248.56	2	4.38244	78.0972
	W5KTG2;A0A0P7V2T7;A0A0S7GFS1;A0A0S7GFS2;A0A0S7GFS3;A0A0S7GG64;A0A0S7GGW2;A0A0S7GGW7;A0A0S7GI92;A0A0S7GKU3;A0A0S7GLM7;A0A0S7GLW5;A0A1A7WGD9;A0A1A7Z4A6;A0A1A8AIC9;A0A1A8DRB6;A0A1A8GCR2;A0A1A8KF62;A0A1A8MAY9;A0A1A8MXE6;A0A1A8QNY9;A0A1A8RNY5;A0A1A8SFC1;A0A1A8UI02;A0A060XJX9;A0A146NIL5;A0A146NIU7;A0A146NJR6;A0A146Q523;A0A146Z4J7;A0A146Z4K2;A0A146Z4L3;A0A146Z4P1;A0A146Z6F5;A0A146Z650;C0PUV6;G3Q393;G3Q3…	0.915266	0.700824	LLEAQEHFR		59.87	571.799	1141.58	2	-6.0651	40.3512
	W5KTG2;A0A0P7VEP4;A0A060XII9;A0A060XJX9;W5KTF3;W5MFM2;W5MFP4	1.2209	0.885881	RDELITNWEQIR		59.13	524.945	1571.81	3	1.41583	87.0717
	W5KTG2;A0A0D9SGF6;A0A0P7V2T7;A0A0P7VEP4;A0A0R4IJ08;A0A0S7GFQ2;A0A0S7GFQ8;A0A0S7GFR3;A0A0S7GFS1;A0A0S7GFS2;A0A0S7GFS3;A0A0S7GG64;A0A0S7GGW2;A0A0S7GGW7;A0A0S7GI92;A0A0S7GKU3;A0A0S7GLM7;A0A0S7GLW5;A0A0S7GNH5;A0A1A7WGD9;A0A1A7Z4A6;A0A1A8AIC9;A0A1A8DRB6;A0A1A8GCR2;A0A1A8KF62;A0A1A8MAY9;A0A1A8MXE6;A0A1A8QNY9;A0A1A8RNY5;A0A1A8SFC1;A0A1A8UI02;A0A060XII9;A0A060XJX9;A0A087XQU7;A0A146NIL5;A0A146NIU7;A0A146N…	0.128867	41.2466	HQAFEAELHANADR		59.07	536.923	1607.75	3	3.95866	36.1187
	W5KTG2;A0A0R4IJ08;A0A0S7GFR3;A0A0S7GFS1;A0A0S7GFS2;A0A0S7GFS3;A0A0S7GG64;A0A0S7GGW2;A0A0S7GGW7;A0A0S7GKU3;A0A0S7GLM7;A0A0S7GNH5;A0A1A7WGD9;A0A1A7Z4A6;A0A1A8AIC9;A0A1A8DRB6;A0A1A8GCR2;A0A1A8MAY9;A0A1A8MXE6;A0A1A8QNY9;A0A1A8RNY5;A0A1A8SFC1;A0A1A8UI02;A0A060XII9;A0A060XJX9;A0A087XQU7;A0A146NIL5;A0A146NIU7;A0A146NJR6;A0A146Q523;A0A146Z4H1;A0A146Z4J7;A0A146Z4K2;A0A146Z4L3;A0A146Z4P1;A0A146Z5L2;A0A146Z…	1.11941	0.935289	SNMLGSAHEVQR		58.43	443.55	1327.63	3	-0.271899	27.1652
	W5KTG2;A0A0D9SGF6;A0A0P7VEP4;A0A0R4IJ08;A0A0S7GKE8;A0A0S7GMT1;A0A0S7GQA6;A0A1A7WGD9;A0A1A7Z4A6;A0A1A8D2Q6;A0A1A8D8C3;A0A1A8GCR2;A0A1A8I584;A0A1A8KR84;A0A1A8MAY9;A0A1A8QC83;A0A1A8SFC1;A0A1A8UI02;A0A060XII9;A0A060XJX9;A0A087XQU7;A0A146Q523;A0A146Z4H1;A0A146Z4K2;A0A146Z4L3;A0A146Z4P1;A0A146Z5L2;A0A146Z6F5;F1R443;F1R446;G3Q393;G3Q398;H2MBY2;H2UIA9;H2UIB0;H2UIB1;H3C0G3;H3CBT9;M4A8R0;Q4T9R4;Q566W8;Q138…	9.5342	1.23316	EQLMASDDFGR		57.64	634.784	1267.55	2	1.9613	56.4104
	W5KTG2;A0A0D9SGF6;A0A0P7VEP4;A0A0R4IJ08;A0A0S7GKE8;A0A0S7GMT1;A0A0S7GQA6;A0A1A7WGD9;A0A1A7Z4A6;A0A1A8D2Q6;A0A1A8D8C3;A0A1A8GCR2;A0A1A8I584;A0A1A8KR84;A0A1A8MAY9;A0A1A8QC83;A0A1A8SFC1;A0A1A8UI02;A0A060XII9;A0A060XJX9;A0A087XQU7;A0A146Q523;A0A146Z4H1;A0A146Z4K2;A0A146Z4L3;A0A146Z4P1;A0A146Z5L2;A0A146Z6F5;F1R443;F1R446;G3Q393;G3Q398;H2MBY2;H2UIA9;H2UIB0;H2UIB1;H3C0G3;H3CBT9;M4A8R0;Q4T9R4;Q566W8;Q138…	0.0416343	6.13441	EKEQLMASDDFGRDLASVQALLR		57.25	648.836	2591.31	4	5.12752	164.992
	W5KTG2;A0A0P7VEP4;A0A0R4IJ08;A0A0S7GKQ9;A0A0S7GMT1;A0A0S7GRJ6;A0A1A7WGD9;A0A1A7Z4A6;A0A1A8D2Q6;A0A1A8D8C3;A0A1A8GCR2;A0A1A8I584;A0A1A8KR84;A0A1A8MAY9;A0A1A8QC83;A0A1A8SFC1;A0A1A8UI02;A0A060XII9;A0A087XQU7;A0A146Q523;A0A146Z4H1;A0A146Z4K2;A0A146Z4L3;A0A146Z4P1;A0A146Z5L2;A0A146Z6F5;A0A146Z650;F1R443;F1R446;G3Q393;G3Q398;H2UIA9;H2UIB0;H2UIB1;H3C0G3;H3CBT9;I3JZ89;I3JZ90;M4A8R0;Q4T9R4;Q4T9R5;W5KTF3;W…	1.03818	313.195	RAALEDSFHLQQFFR		57.22	466.997	1863.96	4	9.12968	123.824
	W5KTG2;A0A0D9SGF6;A0A0P7V2T7;A0A0P7VEP4;A0A0R4IJ08;A0A0S7GFQ8;A0A0S7GFR3;A0A0S7GFS1;A0A0S7GFS2;A0A0S7GFS3;A0A0S7GFT9;A0A0S7GG64;A0A0S7GGW2;A0A0S7GGW7;A0A0S7GKU3;A0A0S7GLM7;A0A0S7GNH5;A0A1A7WGD9;A0A1A7Z4A6;A0A1A8AIC9;A0A1A8DRB6;A0A1A8GCR2;A0A1A8KF62;A0A1A8MAY9;A0A1A8MXE6;A0A1A8QNY9;A0A1A8RNY5;A0A1A8SFC1;A0A1A8UI02;A0A060XII9;A0A060XJX9;A0A087XQU7;A0A146NIL5;A0A146NIU7;A0A146NJR6;A0A146Q523;A0A146Z…	176.124	1.01947	SKLGESQTLQQFSR		57.05	804.917	1607.82	2	-6.37406	53.0722
	W5KTG2;A0A0D9SGF6;A0A0P7V2T7;A0A0P7VEP4;A0A0R4IJ08;A0A0S7GKE8;A0A0S7GMT1;A0A0S7GQA6;A0A1A7WGD9;A0A1A7Z4A6;A0A1A8D2Q6;A0A1A8D8C3;A0A1A8GCR2;A0A1A8I584;A0A1A8KR84;A0A1A8MAY9;A0A1A8QC83;A0A1A8SFC1;A0A1A8UI02;A0A060XII9;A0A060XJX9;A0A087XQU7;A0A146Q523;A0A146Z4H1;A0A146Z4K2;A0A146Z4L3;A0A146Z4P1;A0A146Z5L2;A0A146Z6F5;F1R443;F1R446;H2UIA9;H2UIB0;H2UIB1;I3JZ89;I3JZ90;M4A8R0;Q4T9R4;Q4T9R5;Q566W8;Q13813;…	1.06504	1.20015	FNRDVDETISWIK		56.12	541.613	1621.82	3	3.67186	98.3523
	W5KTG2;A0A0D9SGF6;A0A0P7V2T7;A0A0R4IJ08;A0A0S7GFR3;A0A0S7GFS1;A0A0S7GFS2;A0A0S7GFS3;A0A0S7GG64;A0A0S7GGW2;A0A0S7GGW7;A0A0S7GKU3;A0A0S7GLM7;A0A0S7GNH5;A0A1A7WGD9;A0A1A7Z4A6;A0A1A8AIC9;A0A1A8DRB6;A0A1A8GCR2;A0A1A8MAY9;A0A1A8MXE6;A0A1A8QNY9;A0A1A8RNY5;A0A1A8SFC1;A0A1A8UI02;A0A060XII9;A0A060XJX9;A0A087XQU7;A0A146NIL5;A0A146NIU7;A0A146NJR6;A0A146Q523;A0A146Z4H1;A0A146Z4J7;A0A146Z4K2;A0A146Z4L3;A0A146Z…	377.696	18.7436	DADETKEWIEEK		55.6	498.234	1491.68	3	7.33982	44.8114
	W5KTG2;A0A0D9SGF6;A0A0P7VEP4;A0A0R4IJ08;A0A0S7GKE8;A0A0S7GMT1;A0A0S7GQA6;A0A1A7WGD9;A0A1A7Z4A6;A0A1A8D2Q6;A0A1A8D8C3;A0A1A8GCR2;A0A1A8I584;A0A1A8KR84;A0A1A8MAY9;A0A1A8QC83;A0A1A8SFC1;A0A1A8UI02;A0A060XII9;A0A060XJX9;A0A087XQU7;A0A146Q523;A0A146Z4H1;A0A146Z4K2;A0A146Z4L3;A0A146Z4P1;A0A146Z5L2;A0A146Z6F5;F1R443;F1R446;G3Q393;G3Q398;H2MBY2;H2UIA9;H2UIB0;H2UIB1;H3C0G3;H3CBT9;M4A8R0;Q4T9R4;Q566W8;Q138…	0.13822	0.0380785	EQLMASDDFGRDLASVQALLR		53.67	779.066	2334.18	3	7.43772	168.006
	W5KTG2;A0A0P7VEP4;A0A0R4IJ08;A0A0S7GFR3;A0A0S7GFS1;A0A0S7GFS2;A0A0S7GFS3;A0A0S7GG64;A0A0S7GGW2;A0A0S7GGW7;A0A0S7GKU3;A0A0S7GLM7;A0A0S7GNH5;A0A1A7WGD9;A0A1A7Z4A6;A0A1A8AIC9;A0A1A8DRB6;A0A1A8GCR2;A0A1A8KF62;A0A1A8MAY9;A0A1A8MXE6;A0A1A8QNY9;A0A1A8RNY5;A0A1A8SFC1;A0A1A8UI02;A0A060XII9;A0A060XJX9;A0A087XQU7;A0A146NIL5;A0A146NIU7;A0A146NJR6;A0A146Q523;A0A146Z4H1;A0A146Z4J7;A0A146Z4K2;A0A146Z4L3;A0A146Z…	7.67321	210.65	LIQSHPEAVDDIQEK		52.66	861.44	1720.86	2	2.68113	42.2016
	W5KTG2;A0A0D9SGF6;A0A0P7V2T7;A0A0P7VEP4;A0A0R4IJ08;A0A0S7GFR3;A0A0S7GFS2;A0A0S7GG64;A0A0S7GKU3;A0A0S7GLM7;A0A1A7WGD9;A0A1A7Z4A6;A0A1A8D2Q6;A0A1A8D8C3;A0A1A8GCR2;A0A1A8I584;A0A1A8KR84;A0A1A8MAY9;A0A1A8QC83;A0A1A8SFC1;A0A1A8UI02;A0A060XII9;A0A060XJX9;A0A087XQU7;A0A146NJR6;A0A146Q523;A0A146Z4H1;A0A146Z4J7;A0A146Z4K2;A0A146Z4L3;A0A146Z4P1;A0A146Z5L2;A0A146Z6F5;A0A146Z650;F1R443;F1R446;G3Q393;G3Q398;H…	1.0417	0.0543832	LREANQQQQFNR		52.37	511.262	1530.76	3	-4.27043	20.2292
	W5KTG2;A0A0D9SGF6;A0A0P7V2T7;A0A0P7VEP4;A0A0R4IJ08;A0A0S7GKE8;A0A0S7GMT1;A0A0S7GQA6;A0A1A7WGD9;A0A1A7Z4A6;A0A1A8D2Q6;A0A1A8D8C3;A0A1A8GCR2;A0A1A8I584;A0A1A8KR84;A0A1A8MAY9;A0A1A8QC83;A0A1A8SFC1;A0A1A8UI02;A0A060XII9;A0A060XJX9;A0A087XQU7;A0A146Q523;A0A146Z4H1;A0A146Z4K2;A0A146Z4L3;A0A146Z4P1;A0A146Z5L2;A0A146Z6F5;F1R443;F1R446;G3Q393;G3Q398;H2UIA9;H2UIB0;H2UIB1;H3C0G3;H3CBT9;I3JZ89;I3JZ90;M4A8R0;…	0.0367097	0.749109	DVDETISWIK		51.1	603.309	1204.6	2	2.06903	95.814
	W5KTG2;A0A0D9SGF6;A0A0P7VEP4;A0A0R4IJ08;A0A0S7GFR3;A0A0S7GFS2;A0A0S7GG64;A0A0S7GKU3;A0A0S7GLM7;A0A1A7WGD9;A0A1A7Z4A6;A0A1A8D2Q6;A0A1A8D8C3;A0A1A8GCR2;A0A1A8I584;A0A1A8KR84;A0A1A8MAY9;A0A1A8QC83;A0A1A8SFC1;A0A1A8UI02;A0A060XII9;A0A060XJX9;A0A087XQU7;A0A146NJR6;A0A146Q523;A0A146Z4H1;A0A146Z4J7;A0A146Z4K2;A0A146Z4L3;A0A146Z4P1;A0A146Z5L2;A0A146Z6F5;A0A146Z650;F1R443;F1R446;G3Q393;G3Q398;H2UIA9;H2UIB…	1.30642	0.821557	LLEATELK		50.6	458.772	915.529	2	-0.816887	51.8015
	W5KTG2;A0A0P7VEP4;A0A0S7GKE8;A0A0S7GMT1;A0A0S7GQA6;A0A060XII9;A0A060XJX9;A0A087XQU7;G3Q393;G3Q398;H2MBY2;M4A8R0;W5KTF3	0.00302745	0.927096	LQQTHPQNASQIHLK		50.1	581.649	1741.92	3	2.82737	28.7175
	W5KTG2;A0A0D9SGF6;A0A0P7VEP4;A0A060XII9;A0A060XJX9;G3Q393;G3Q398;H2MBY2;H2UIA9;H2UIB0;H2UIB1;H3C0G3;H3CBT9;I3JZ89;I3JZ90;Q4T9R4;Q4T9R5;Q13813;W5KTF3	0.245887	216.521	EKEPIAASTNR		49.93	405.882	1214.62	3	-5.4443	13.345
	W5KTG2;A0A0P7VEP4;A0A0R4IJ08;A0A060XII9;A0A060XJX9;F1R443;F1R446;G3Q393;G3Q398;H2UIA9;H2UIB0;H2UIB1;H3C0G3;H3CBT9;I3JZ89;I3JZ90;Q4T9R4;W5KTF3;W5MFM2;W5MFP4	0.837064	1.10897	LLVSSEDYGRDLTGVQNLR		48.03	712.376	2134.11	3	2.65968	98.3523
	W5KTG2;A0A0D9SGF6;A0A0P7V2T7;A0A0P7VEP4;A0A0R4IJ08;A0A0S7GFQ2;A0A0S7GFQ8;A0A0S7GFR3;A0A0S7GFS1;A0A0S7GFS2;A0A0S7GFS3;A0A0S7GG64;A0A0S7GGW2;A0A0S7GGW7;A0A0S7GI92;A0A0S7GKU3;A0A0S7GLM7;A0A0S7GLW5;A0A0S7GNH5;A0A1A7WGD9;A0A1A7Z4A6;A0A1A8AIC9;A0A1A8DRB6;A0A1A8GCR2;A0A1A8KF62;A0A1A8MAY9;A0A1A8MXE6;A0A1A8QNY9;A0A1A8RNY5;A0A1A8SFC1;A0A1A8UI02;A0A060XII9;A0A060XJX9;A0A087XQU7;A0A146NIL5;A0A146NIU7;A0A146N…	0.953975	0.827656	DLTGVQNLR		47.62	508.28	1014.55	2	-4.07736	50.4624
	W5KTG2;A0A0P7VEP4;A0A0S7GKE8;A0A0S7GMT1;A0A0S7GQA6;A0A060XII9;A0A060XJX9;A0A087XQU7;G3Q393;G3Q398;H2MBY2;M4A8R0;W5KTF3	0.108311	0.892203	LQQTHPQNASQIHLK		47.42	436.489	1741.93	4	4.37772	28.7175
	W5KTG2;A0A0D9SGF6;A0A0P7V2T7;A0A0P7VEP4;A0A0R4IJ08;A0A0S7GFQ8;A0A0S7GFR3;A0A0S7GFS1;A0A0S7GFS2;A0A0S7GFS3;A0A0S7GFT9;A0A0S7GG64;A0A0S7GGW2;A0A0S7GGW7;A0A0S7GKU3;A0A0S7GLM7;A0A0S7GNH5;A0A1A7WGD9;A0A1A7Z4A6;A0A1A8AIC9;A0A1A8DRB6;A0A1A8GCR2;A0A1A8KF62;A0A1A8MAY9;A0A1A8MXE6;A0A1A8QNY9;A0A1A8RNY5;A0A1A8SFC1;A0A1A8UI02;A0A060XII9;A0A060XJX9;A0A087XQU7;A0A146NIL5;A0A146NIU7;A0A146NJR6;A0A146Q523;A0A146Z…	11.0449	93.973	SKLGESQTLQQFSR		46.81	536.945	1607.81	3	-10.3331	53.0722
	W5KTG2;A0A0R4IJ08;A0A0S7GKE8;A0A0S7GKV9;A0A0S7GMT1;A0A0S7GPJ4;A0A0S7GQA6;A0A0S7GRJ6;A0A1A7WGD9;A0A1A7Z4A6;A0A1A8D2Q6;A0A1A8D8C3;A0A1A8GCR2;A0A1A8I584;A0A1A8KR84;A0A1A8MAY9;A0A1A8QC83;A0A1A8SFC1;A0A1A8UI02;A0A060XII9;A0A087XQU7;A0A146Q523;A0A146Z4H1;A0A146Z4K2;A0A146Z4L3;A0A146Z4P1;A0A146Z5L2;A0A146Z6F5;F1R443;F1R446;H2MBY2;H2UIA9;H2UIB0;H2UIB1;H3C0G3;H3CBT9;M4A8R0;Q4T9R4;Q4T9R5;Q566W8;W5KTF3;W5MF…	1.85005	1.01947	LWDLLLQK		39.08	514.813	1027.61	2	0.50593	123.824
	W5KTG2;A0A0D9SGF6;A0A0P7V2T7;A0A0P7VEP4;A0A0R4IJ08;A0A0S7GFS1;A0A0S7GFS2;A0A0S7GFS3;A0A0S7GG64;A0A0S7GGW2;A0A0S7GGW7;A0A0S7GI92;A0A0S7GKU3;A0A0S7GLM7;A0A0S7GLW5;A0A060XII9;A0A087XQU7;A0A146NIL5;A0A146NIU7;A0A146NJR6;A0A146Q523;A0A146Z4J7;A0A146Z4K2;A0A146Z4L3;A0A146Z4P1;A0A146Z6F5;A0A146Z650;C0PUV6;F1R443;F1R446;G3Q393;G3Q398;H2MBY2;H2UGD2;H2UIA9;H2UIB0;H2UIB1;H3C0G3;H3CBT9;I3JZ89;I3JZ90;M4A8R0;Q…	1.20725	0.827429	ENSLKTDDYGR		38.31	433.213	1296.62	3	19.998	19.9438
	W5KTG2;A0A0D9SGF6;A0A0P7V2T7;A0A0P7VEP4;A0A0R4IJ08;A0A0S7GFQ8;A0A0S7GFR3;A0A0S7GFS1;A0A0S7GFS2;A0A0S7GFS3;A0A0S7GFT9;A0A0S7GG64;A0A0S7GGW2;A0A0S7GGW7;A0A0S7GKU3;A0A0S7GLM7;A0A0S7GNH5;A0A1A7WGD9;A0A1A7Z4A6;A0A1A8AIC9;A0A1A8DRB6;A0A1A8GCR2;A0A1A8KF62;A0A1A8MAY9;A0A1A8MXE6;A0A1A8QNY9;A0A1A8RNY5;A0A1A8SFC1;A0A1A8UI02;A0A060XII9;A0A060XJX9;A0A087XQU7;A0A146NIL5;A0A146NIU7;A0A146NJR6;A0A146Q523;A0A146Z…	1.03591	0.81451	LGESQTLQQFSR		37.01	465.242	1392.7	3	2.45396	58.6754
	W5KTG2;A0A0D9SGF6;A0A0P7VEP4;A0A0R4IJ08;A0A0S7GFS1;A0A0S7GFS2;A0A0S7GFS3;A0A0S7GG64;A0A0S7GGW2;A0A0S7GGW7;A0A0S7GI92;A0A0S7GKU3;A0A0S7GLM7;A0A0S7GLW5;A0A1A7WGD9;A0A1A7Z4A6;A0A1A8AIC9;A0A1A8DRB6;A0A1A8GCR2;A0A1A8KF62;A0A1A8MAY9;A0A1A8MXE6;A0A1A8QNY9;A0A1A8RNY5;A0A1A8SFC1;A0A1A8UI02;A0A060XII9;A0A060XJX9;A0A087XQU7;A0A146NIL5;A0A146NIU7;A0A146NJR6;A0A146Q523;A0A146Z4J7;A0A146Z4K2;A0A146Z4L3;A0A146Z…	1.53291	0.988724	KVEDLFLTFAK		36.93	655.857	1309.7	2	-23.1591	119.386
	W5KTG2;A0A0D9SGF6;A0A0P7V2T7;A0A0P7VEP4;A0A0R4IJ08;A0A0S7GFR3;A0A0S7GFS2;A0A0S7GG64;A0A0S7GKU3;A0A0S7GLM7;A0A1A7WGD9;A0A1A7Z4A6;A0A1A8D2Q6;A0A1A8GCR2;A0A1A8I584;A0A1A8KR84;A0A1A8MAY9;A0A1A8SFC1;A0A060XII9;A0A060XJX9;A0A087XQU7;A0A146NIL5;A0A146NIU7;A0A146NJR6;A0A146Q523;A0A146Z4H1;A0A146Z4J7;A0A146Z4L3;A0A146Z4P1;A0A146Z5L2;A0A146Z6F5;A0A146Z650;F1R443;F1R446;G3Q393;G3Q398;H2MBY2;H2UIA9;H2UIB0;H2…	1.12398	1.23248	GKDLIGVQNLLKK		36.53	357.226	1424.87	4	2.74437	80.7888
	W5KTG2;A0A0D9SGF6;A0A0P7V2T7;A0A0P7VEP4;A0A0R4IJ08;A0A0S7GFQ8;A0A0S7GFR3;A0A0S7GFS1;A0A0S7GFS2;A0A0S7GFS3;A0A0S7GFT9;A0A0S7GG64;A0A0S7GGW2;A0A0S7GGW7;A0A0S7GKU3;A0A0S7GLM7;A0A0S7GNH5;A0A1A7WGD9;A0A1A7Z4A6;A0A1A8AIC9;A0A1A8DRB6;A0A1A8GCR2;A0A1A8KF62;A0A1A8MAY9;A0A1A8MXE6;A0A1A8QNY9;A0A1A8RNY5;A0A1A8SFC1;A0A1A8UI02;A0A060XII9;A0A060XJX9;A0A087XQU7;A0A146NIL5;A0A146NIU7;A0A146NJR6;A0A146Q523;A0A146Z…	1.03818	173.829	KHEDFDKAINVQEEK		32.61	458.234	1828.91	4	4.44861	30.8362
G3Q393	88	1.26151	1.01947	88
	G3Q393;A0A0D9SGF6;A0A0R4IJ08;A0A0S7GFR3;A0A0S7GFS1;A0A0S7GFS2;A0A0S7GFS3;A0A0S7GG64;A0A0S7GGW2;A0A0S7GGW7;A0A0S7GKU3;A0A0S7GLM7;A0A0S7GNH5;A0A1A7WGD9;A0A1A7Z4A6;A0A1A8GCR2;A0A1A8MAY9;A0A1A8MXE6;A0A1A8QNY9;A0A1A8RNY5;A0A1A8SFC1;A0A060XII9;A0A060XJX9;A0A087XQU7;A0A146NIL5;A0A146NIU7;A0A146NJR6;A0A146Q523;A0A146Z4H1;A0A146Z4J7;A0A146Z4K2;A0A146Z4L3;A0A146Z4P1;A0A146Z5L2;A0A146Z6F5;A0A146Z650;F1QDX2;…	1.10634	0.946459	NQALNTDNYGHDLASVQALQR		127.8	776.717	2327.13	3	-0.924291	82.1301
	G3Q393;A0A0P7V2T7;A0A0S7GFR3;A0A0S7GFS1;A0A0S7GFS2;A0A0S7GFS3;A0A0S7GG64;A0A0S7GGW2;A0A0S7GGW7;A0A0S7GKU3;A0A0S7GLM7;A0A0S7GNH5;A0A1A7WGD9;A0A1A7Z4A6;A0A1A8AIC9;A0A1A8DRB6;A0A1A8GCR2;A0A1A8KF62;A0A1A8MAY9;A0A1A8MXE6;A0A1A8QNY9;A0A1A8RNY5;A0A1A8SFC1;A0A1A8UI02;A0A060XJX9;A0A087XQU7;A0A146NIL5;A0A146NIU7;A0A146NJR6;A0A146Q523;A0A146Z4H1;A0A146Z4J7;A0A146Z4K2;A0A146Z4L3;A0A146Z4P1;A0A146Z5L2;A0A146Z…	0.000970093	0.480679	GLVSSEELAKDVTGAEALLER		115.99	729.722	2186.15	3	2.34333	162.693
	G3Q393;A0A0R4IJ08;A0A0S7GFS1;A0A0S7GFS2;A0A0S7GFS3;A0A0S7GG64;A0A0S7GGW2;A0A0S7GGW7;A0A0S7GI92;A0A0S7GKU3;A0A0S7GLM7;A0A0S7GLW5;A0A1A7WGD9;A0A1A7Z4A6;A0A1A8AIC9;A0A1A8DRB6;A0A1A8GCR2;A0A1A8KF62;A0A1A8MAY9;A0A1A8MXE6;A0A1A8QNY9;A0A1A8RNY5;A0A1A8SFC1;A0A1A8UI02;A0A060XII9;A0A060XJX9;A0A087XQU7;A0A146NIL5;A0A146NIU7;A0A146NJR6;A0A146Q523;A0A146Z4J7;A0A146Z4K2;A0A146Z4L3;A0A146Z4P1;A0A146Z6F5;A0A146Z…	1.12788	1556.08	LNLVGSEDYGDTLAAVQGLLK		115.77	726.054	2175.14	3	0.603017	171.724
	G3Q393;A0A060XII9;A0A060XJX9;G3Q398;H2UIA9;H2UIB0;H2UIB1;I3JZ89;I3JZ90	1.50932	0.826446	LGALDEQWQFLVNK		110.33	830.941	1659.87	2	3.97313	140.23
	G3Q393;A0A0R4IJ08;A0A0S7GFS1;A0A0S7GFS2;A0A0S7GFS3;A0A0S7GG64;A0A0S7GGW2;A0A0S7GGW7;A0A0S7GI92;A0A0S7GKU3;A0A0S7GLM7;A0A0S7GLW5;A0A1A7WGD9;A0A1A7Z4A6;A0A1A8AIC9;A0A1A8DRB6;A0A1A8GCR2;A0A1A8KF62;A0A1A8MAY9;A0A1A8MXE6;A0A1A8QNY9;A0A1A8RNY5;A0A1A8SFC1;A0A1A8UI02;A0A060XII9;A0A060XJX9;A0A087XQU7;A0A146NIL5;A0A146NIU7;A0A146NJR6;A0A146Q523;A0A146Z4J7;A0A146Z4K2;A0A146Z4L3;A0A146Z4P1;A0A146Z6F5;A0A146Z…	16.1158	1.01947	LNLVGSEDYGDTLAAVQGLLK		109.97	1088.58	2175.15	2	6.71343	175.929
	G3Q393;A0A0D9SGF6;A0A0P7V2T7;A0A0P7VEP4;A0A0R4IJ08;A0A0S7GFS1;A0A0S7GFS2;A0A0S7GFS3;A0A0S7GG64;A0A0S7GGW2;A0A0S7GGW7;A0A0S7GI92;A0A0S7GKU3;A0A0S7GLM7;A0A0S7GLW5;A0A1A7WGD9;A0A1A7Z4A6;A0A1A8AIC9;A0A1A8DRB6;A0A1A8GCR2;A0A1A8KF62;A0A1A8MAY9;A0A1A8MXE6;A0A1A8QNY9;A0A1A8RNY5;A0A1A8SFC1;A0A1A8UI02;A0A1B0GV13;A0A060XII9;A0A060XJX9;A0A087XQU7;A0A146NIL5;A0A146NIU7;A0A146NJR6;A0A146Q523;A0A146Z4J7;A0A146Z…	1.62303	0.582025	LDENSAFLQFNWK		109.63	806.398	1610.78	2	7.24726	133.8
	G3Q393;A0A0P7V2T7;A0A0P7VEP4;A0A0R4IJ08;A0A0S7GKE8;A0A0S7GMT1;A0A0S7GQA6;A0A1A7WGD9;A0A1A7Z4A6;A0A1A8D2Q6;A0A1A8D8C3;A0A1A8GCR2;A0A1A8I584;A0A1A8KR84;A0A1A8MAY9;A0A1A8QC83;A0A1A8SFC1;A0A1A8UI02;A0A060XII9;A0A060XJX9;A0A087XQU7;A0A146Q523;A0A146Z4H1;A0A146Z4K2;A0A146Z4L3;A0A146Z4P1;A0A146Z5L2;A0A146Z6F5;A0A146Z650;F1R443;F1R446;G3Q398;H2MBY2;I3JZ89;I3JZ90;M4A8R0;Q566W8;W5KTF3;W5KTG2;W5MFM2;W5MFP4	3.19093	1.85266	ALINADELANDVAGAEALLDR		107	718.709	2153.11	3	2.54416	185.541
	G3Q393;A0A0D9SGF6;A0A0P7V2T7;A0A0P7VEP4;A0A0R4IJ08;A0A0S7GFS2;A0A0S7GFS3;A0A0S7GGW7;A0A0S7GI92;A0A0S7GKU3;A0A1A7WGD9;A0A1A7Z4A6;A0A1A8AIC9;A0A1A8DRB6;A0A1A8GCR2;A0A1A8KF62;A0A1A8MAY9;A0A1A8MXE6;A0A1A8QNY9;A0A1A8RNY5;A0A1A8SFC1;A0A1A8UI02;A0A060XII9;A0A060XJX9;A0A087XQU7;A0A146NIU7;A0A146Q523;A0A146Z4J7;A0A146Z4L3;A0A146Z4P1;A0A146Z6F5;A0A146Z650;C0PUV6;F1R443;F1R445;F1R446;F8K8N3;G3Q398;H2MBY2;H2…	2.21306	2.37499	IEDLGAAMEEALILDNK		106.2	922.972	1843.93	2	5.60561	153.845
	G3Q393;A0A0D9SGF6;A0A0P7V2T7;A0A0P7VEP4;A0A0R4IJ08;A0A0S7GFS2;A0A0S7GFS3;A0A0S7GGW7;A0A0S7GI92;A0A0S7GKU3;A0A1A7WGD9;A0A1A7Z4A6;A0A1A8AIC9;A0A1A8DRB6;A0A1A8GCR2;A0A1A8KF62;A0A1A8MAY9;A0A1A8MXE6;A0A1A8QNY9;A0A1A8RNY5;A0A1A8SFC1;A0A1A8UI02;A0A060XII9;A0A060XJX9;A0A087XQU7;A0A146NIU7;A0A146Q523;A0A146Z4J7;A0A146Z4L3;A0A146Z4P1;A0A146Z6F5;A0A146Z650;C0PUV6;F1R443;F1R445;F1R446;F8K8N3;G3Q398;H2MBY2;H2…	12.4474	0.768997	KIEDLGAAMEEALILDNK		99.23	658.351	1972.03	3	5.84731	152.693
	G3Q393;A0A0D9SGF6;A0A0P7V2T7;A0A0P7VEP4;A0A0R4IJ08;A0A0S7GFR3;A0A0S7GFS2;A0A0S7GG64;A0A0S7GKU3;A0A0S7GLM7;A0A1A7WGD9;A0A1A7Z4A6;A0A1A8D2Q6;A0A1A8GCR2;A0A1A8I584;A0A1A8KR84;A0A1A8MXE6;A0A1A8QNY9;A0A1A8SFC1;A0A060XII9;A0A060XJX9;A0A146NIL5;A0A146NIU7;A0A146NJR6;A0A146Q523;A0A146Z4H1;A0A146Z4J7;A0A146Z4K2;A0A146Z4L3;A0A146Z4P1;A0A146Z5L2;A0A146Z6F5;A0A146Z650;F1R443;F1R446;G3Q398;H2UIB0;H2UIB1;H3CBT…	1.03818	2427.31	QQVAPTDDETGKELVLALYDYQEK		96.33	918.458	2752.35	3	4.07101	131.026
	G3Q393;A0A0D9SGF6;A0A0P7V2T7;A0A0R4IJ08;A0A0S7GFR3;A0A0S7GFS2;A0A0S7GG64;A0A0S7GKU3;A0A0S7GLM7;A0A1A7WGD9;A0A1A7Z4A6;A0A1A8D2Q6;A0A1A8D8C3;A0A1A8GCR2;A0A1A8I584;A0A1A8KR84;A0A1A8MAY9;A0A1A8RNY5;A0A1A8SFC1;A0A060XII9;A0A060XJX9;A0A087XQU7;F1R443;F1R446;G3Q398;H2MBY2;I3JZ89;I3JZ90;M4A8R0;Q13813;W5KTF3;W5KTG2;W5MFM2;W5MFP4	1.03818	1.24516	RQDLEDSLQAQQYFADANEAESWMR		95.41	1001.12	3000.34	3	4.19052	134.37
	G3Q393;A0A0D9SGF6;A0A0P7V2T7;A0A0P7VEP4;A0A0R4IJ08;A0A1A7WGD9;A0A1A7Z4A6;A0A1A8D2Q6;A0A1A8D8C3;A0A1A8GCR2;A0A1A8I584;A0A1A8KR84;A0A1A8MAY9;A0A1A8QC83;A0A1A8SFC1;A0A1A8UI02;A0A060XII9;A0A060XJX9;A0A087XQU7;A0A146Q523;A0A146Z4H1;A0A146Z4J7;A0A146Z4K2;A0A146Z4L3;A0A146Z4P1;A0A146Z5L2;A0A146Z6F5;A0A146Z650;F1R443;F1R446;G3Q398;H2MBY2;H2UIA9;H2UIB0;H2UIB1;H3C0G3;H3CBT9;I3JZ89;I3JZ90;M4A8R0;Q4T9R4;Q4T9…	1.02938	1.07542	HQAFEAELSANQSR		92.43	529.923	1586.75	3	4.18109	40.423
	G3Q393;A0A0D9SFH4;A0A0D9SGF6;A0A0P7V2T7;A0A0P7VEP4;A0A0R4IJ08;A0A0S7GFS2;A0A0S7GFS3;A0A0S7GGW7;A0A0S7GI92;A0A0S7GKU3;A0A1A7WGD9;A0A1A7Z4A6;A0A1A8AIC9;A0A1A8DRB6;A0A1A8GCR2;A0A1A8KF62;A0A1A8MAY9;A0A1A8MXE6;A0A1A8QNY9;A0A1A8RNY5;A0A1A8SFC1;A0A1A8UI02;A0A060XII9;A0A060XJX9;A0A087XQU7;A0A146NIU7;A0A146Q523;A0A146Z4J7;A0A146Z4L3;A0A146Z4P1;A0A146Z650;C0PUV6;F1R443;F1R445;F1R446;F8K8N3;G3Q398;H2MBY2;H2…	1.80805	0.865306	SSEEIESAFR		88.75	577.771	1153.53	2	-1.61916	51.3788
	G3Q393;A0A0P7VEP4;A0A0R4IJ08;A0A0S7GFS1;A0A0S7GFS2;A0A0S7GFS3;A0A0S7GG64;A0A0S7GGW2;A0A0S7GGW7;A0A0S7GI92;A0A0S7GKU3;A0A0S7GLM7;A0A0S7GLW5;A0A1A7WGD9;A0A1A7Z4A6;A0A1A8AIC9;A0A1A8DRB6;A0A1A8GCR2;A0A1A8KF62;A0A1A8MAY9;A0A1A8MXE6;A0A1A8QNY9;A0A1A8RNY5;A0A1A8SFC1;A0A1A8UI02;A0A060XII9;A0A060XJX9;A0A087XQU7;A0A146NIL5;A0A146NIU7;A0A146NJR6;A0A146Q523;A0A146Z4J7;A0A146Z4K2;A0A146Z4L3;A0A146Z4P1;A0A146Z…	145.971	0.577478	QETFDAGLQAFQQEGITNITALK		88.67	841.766	2522.28	3	3.03161	153.268
	G3Q393;A0A0D9SGF6;A0A0P7VEP4;A0A0R4IJ08;A0A0S7GFS2;A0A0S7GFS3;A0A0S7GGW7;A0A0S7GI92;A0A0S7GKU3;A0A1A7WGD9;A0A1A7Z4A6;A0A1A8AIC9;A0A1A8DRB6;A0A1A8GCR2;A0A1A8KF62;A0A1A8MAY9;A0A1A8MXE6;A0A1A8QNY9;A0A1A8RNY5;A0A1A8SFC1;A0A1A8UI02;A0A060XII9;A0A060XJX9;A0A087XQU7;A0A146NIU7;A0A146Q523;A0A146Z4J7;A0A146Z4L3;A0A146Z4P1;A0A146Z6F5;A0A146Z650;C0PUV6;F1R443;F1R445;F1R446;F8K8N3;G3Q398;H2MBY2;H2UGD2;H3C0G3…	0.233289	0.00119199	YTEHSTVGLAQQWDQLDQLGMR		87.43	859.415	2575.22	3	5.41344	132.586
	G3Q393;A0A0D9SGF6;A0A0P7VEP4;A0A0R4IJ08;A0A060XII9;A0A060XJX9;F1R443;F1R446;G3Q398;H2UIA9;H2UIB0;H2UIB1;H3C0G3;H3CBT9;I3JZ89;I3JZ90;Q4T9R4;Q4T9R5;Q566W8;Q13813;W5KTF3;W5KTG2;W5MFM2;W5MFP4	1.14844	0.843343	LFGAAEVQR		87	495.772	989.53	2	0.100762	47.4206
	G3Q393;A0A0D9SGF6;A0A0P7V2T7;A0A0R4IJ08;A0A1A7WGD9;A0A1A7Z4A6;A0A1A8D2Q6;A0A1A8GCR2;A0A1A8I584;A0A1A8KR84;A0A1A8MXE6;A0A1A8QNY9;A0A1A8SFC1;A0A060XII9;A0A060XJX9;F1R443;F1R446;G3Q398;Q13813;W5KTF3;W5KTG2	1.54542	1.00188	EANELQQWINEK		84.85	751.369	1500.72	2	1.77925	86.718
	G3Q393;A0A0D9SGF6;A0A0P7VEP4;A0A0R4IJ08;A0A0S7GFQ8;A0A0S7GFR3;A0A0S7GFS1;A0A0S7GFS2;A0A0S7GFS3;A0A0S7GFT9;A0A0S7GG64;A0A0S7GGW2;A0A0S7GGW7;A0A0S7GKU3;A0A0S7GLM7;A0A0S7GNH5;A0A1A7WGD9;A0A1A7Z4A6;A0A1A8AIC9;A0A1A8DRB6;A0A1A8GCR2;A0A1A8KF62;A0A1A8MAY9;A0A1A8MXE6;A0A1A8QNY9;A0A1A8RNY5;A0A1A8SFC1;A0A1A8UI02;A0A060XII9;A0A060XJX9;A0A087XQU7;A0A146NIL5;A0A146NIU7;A0A146NJR6;A0A146Q523;A0A146Z4H1;A0A146Z…	639.152	1.0256	DCEQAENWMAAR	[2] Methylthio (C)	84.18	735.286	1468.56	2	4.578	79.8609
	G3Q393;A0A0D9SGF6;A0A0P7V2T7;A0A0R4IJ08;A0A0S7GFR3;A0A0S7GFS1;A0A0S7GFS2;A0A0S7GFS3;A0A0S7GG64;A0A0S7GGW2;A0A0S7GGW7;A0A0S7GKU3;A0A0S7GLM7;A0A0S7GNH5;A0A1A7WGD9;A0A1A7Z4A6;A0A1A8AIC9;A0A1A8DRB6;A0A1A8GCR2;A0A1A8MAY9;A0A1A8MXE6;A0A1A8QNY9;A0A1A8RNY5;A0A1A8SFC1;A0A1A8UI02;A0A060XII9;A0A060XJX9;A0A087XQU7;A0A146NIL5;A0A146NIU7;A0A146NJR6;A0A146Q523;A0A146Z4H1;A0A146Z4J7;A0A146Z4K2;A0A146Z4L3;A0A146Z…	342.749	49.8991	DADETKEWIEEK		83.48	746.846	1491.68	2	5.32486	44.8114
	G3Q393;A0A0D9SGF6;A0A0P7V2T7;A0A0P7VEP4;A0A0R4IJ08;A0A0S7GFQ8;A0A0S7GFR3;A0A0S7GFS1;A0A0S7GFS2;A0A0S7GFS3;A0A0S7GFT9;A0A0S7GG64;A0A0S7GGW2;A0A0S7GGW7;A0A0S7GKU3;A0A0S7GLM7;A0A0S7GNH5;A0A1A7WGD9;A0A1A7Z4A6;A0A1A8AIC9;A0A1A8DRB6;A0A1A8GCR2;A0A1A8KF62;A0A1A8MAY9;A0A1A8MXE6;A0A1A8QNY9;A0A1A8RNY5;A0A1A8SFC1;A0A1A8UI02;A0A060XII9;A0A060XJX9;A0A087XQU7;A0A146NIL5;A0A146NIU7;A0A146NJR6;A0A146Q523;A0A146Z…	1.58256	1.52869	DVTGAEALLER		82.72	587.31	1172.6	2	3.83635	77.9559
	G3Q393;A0A0D9SGF6;A0A0P7V2T7;A0A0P7VEP4;A0A0R4IJ08;A0A1A7WGD9;A0A1A7Z4A6;A0A1A8D2Q6;A0A1A8D8C3;A0A1A8GCR2;A0A1A8I584;A0A1A8KR84;A0A1A8MAY9;A0A1A8QC83;A0A1A8SFC1;A0A1A8UI02;A0A060XII9;A0A060XJX9;A0A087XQU7;A0A146Q523;A0A146Z4H1;A0A146Z4J7;A0A146Z4K2;A0A146Z4L3;A0A146Z4P1;A0A146Z5L2;A0A146Z6F5;A0A146Z650;F1R443;F1R446;G3Q398;H2MBY2;H2UIA9;H2UIB0;H2UIB1;H3C0G3;H3CBT9;I3JZ89;I3JZ90;M4A8R0;Q4T9R4;Q4T9…	1.36222	1.05396	HQAFEAELSANQSR		82.34	794.38	1586.75	2	3.32603	40.4952
	G3Q393;A0A0D9SGF6;A0A0P7V2T7;A0A0P7VEP4;A0A0R4IJ08;A0A0S7GKE8;A0A0S7GMT1;A0A0S7GQA6;A0A1A7WGD9;A0A1A7Z4A6;A0A1A8D2Q6;A0A1A8D8C3;A0A1A8GCR2;A0A1A8I584;A0A1A8KR84;A0A1A8MAY9;A0A1A8QC83;A0A1A8SFC1;A0A1A8UI02;A0A060XII9;A0A060XJX9;A0A087XQU7;A0A146Q523;A0A146Z4H1;A0A146Z4K2;A0A146Z4L3;A0A146Z4P1;A0A146Z5L2;A0A146Z6F5;F1R443;F1R446;G3Q398;H2MBY2;H2UIA9;H2UIB0;H2UIB1;H3C0G3;H3CBT9;I3JZ89;I3JZ90;M4A8R0;…	13.9598	12.7181	DLASVQALLR		82.27	543.319	1084.62	2	4.01573	111.985
	G3Q393;A0A0R4IJ08;A0A0S7GFS1;A0A0S7GFS2;A0A0S7GFS3;A0A0S7GG64;A0A0S7GGW2;A0A0S7GGW7;A0A0S7GI92;A0A0S7GKU3;A0A0S7GLM7;A0A0S7GLW5;A0A1A7WGD9;A0A1A7Z4A6;A0A1A8AIC9;A0A1A8DRB6;A0A1A8GCR2;A0A1A8KF62;A0A1A8MAY9;A0A1A8MXE6;A0A1A8QNY9;A0A1A8RNY5;A0A1A8SFC1;A0A1A8UI02;A0A060XII9;A0A060XJX9;A0A087XQU7;A0A146NIL5;A0A146NIU7;A0A146NJR6;A0A146Q523;A0A146Z4J7;A0A146Z4L3;A0A146Z4P1;A0A146Z6F5;A0A146Z650;C0PUV6;…	0.00243808	1.43642	QETFDAGLQAFQQEGITNITALKDQLLAAK		81.55	1088.24	3261.69	3	0.395662	190.428
	G3Q393;A0A0R4IJ08;A0A0S7GKE8;A0A0S7GKV9;A0A0S7GQU7;A0A1A8D2Q6;A0A1A8D8C3;A0A1A8GCR2;A0A1A8I584;A0A1A8KR84;A0A1A8MAY9;A0A1A8QC83;A0A1A8SFC1;A0A1A8UI02;A0A060XII9;A0A060XJX9;A0A087XQU7;A0A146Z4H1;A0A146Z4K2;A0A146Z4L3;A0A146Z4P1;A0A146Z5L2;A0A146Z6F5;F1R443;F1R446;G3Q398;H2MBY2;I3JZ89;I3JZ90;M4A8R0;Q32P38;Q566W8;W5KTF3;W5KTG2;W5MFM2;W5MFP4	3.59038	0.31157	DADELEKWIQEK		80.79	752.37	1502.73	2	-2.72521	95.8845
	G3Q393;A0A0D9SGF6;A0A0P7V2T7;A0A0P7VEP4;A0A0R4IJ08;A0A0S7GFS1;A0A0S7GFS2;A0A0S7GFS3;A0A0S7GG64;A0A0S7GGW2;A0A0S7GGW7;A0A0S7GI92;A0A0S7GKU3;A0A0S7GLM7;A0A0S7GLW5;A0A1A7WGD9;A0A1A7Z4A6;A0A1A8AIC9;A0A1A8DRB6;A0A1A8GCR2;A0A1A8KF62;A0A1A8MAY9;A0A1A8MXE6;A0A1A8QNY9;A0A1A8RNY5;A0A1A8SFC1;A0A1A8UI02;A0A060XII9;A0A060XJX9;A0A087XQU7;A0A146NIL5;A0A146NIU7;A0A146NJR6;A0A146Q523;A0A146Z4J7;A0A146Z4K2;A0A146Z…	3.42187	0.776863	ADVVESWIGEK		80.45	616.814	1231.61	2	3.30561	81.7777
	G3Q393;A0A0S7GFS2;A0A0S7GFS3;A0A0S7GGW7;A0A0S7GI92;A0A0S7GKU3;A0A1A7WGD9;A0A1A7Z4A6;A0A1A8AIC9;A0A1A8DRB6;A0A1A8GCR2;A0A1A8KF62;A0A1A8MAY9;A0A1A8MXE6;A0A1A8QNY9;A0A1A8RNY5;A0A1A8SFC1;A0A1A8UI02;A0A060XII9;A0A060XJX9;A0A146NIU7;A0A146Q523;A0A146Z4J7;A0A146Z4L3;A0A146Z4P1;A0A146Z6F5;A0A146Z650;C0PUV6;F1R446;G3Q398;H2MBY2;H3C0G3;H3CBT9;I3JZ89;Q13813;W5KTG2;W5MFM2	3.63141	5.60988	TYLLDGSCMVEESGTLESQLEATKR	[8] Methylthio (C)	79.79	936.109	2805.3	3	4.90607	152.98
	G3Q393;A0A0D9SGF6;A0A0P7V2T7;A0A0P7VEP4;A0A0R4IJ08;A0A0S7GKE8;A0A0S7GMT1;A0A0S7GQA6;A0A1A7WGD9;A0A1A7Z4A6;A0A1A8D2Q6;A0A1A8D8C3;A0A1A8GCR2;A0A1A8I584;A0A1A8KR84;A0A1A8MAY9;A0A1A8QC83;A0A1A8SFC1;A0A1A8UI02;A0A060XII9;A0A060XJX9;A0A087XQU7;A0A146Q523;A0A146Z4H1;A0A146Z4K2;A0A146Z4L3;A0A146Z4P1;A0A146Z5L2;A0A146Z6F5;A0A146Z650;F1R443;F1R446;G3Q398;H2MBY2;H2UIA9;H2UIB0;H2UIB1;H3C0G3;H3CBT9;I3JZ89;I3J…	4.51153	0.892071	DTEQVDNWMSK		79.45	676.796	1351.58	2	5.05027	55.3468
	G3Q393;A0A0R4IJ08;A0A0S7GFS1;A0A0S7GFS2;A0A0S7GFS3;A0A0S7GG64;A0A0S7GGW2;A0A0S7GGW7;A0A0S7GI92;A0A0S7GKU3;A0A0S7GLM7;A0A0S7GLW5;A0A1A7WGD9;A0A1A7Z4A6;A0A1A8AIC9;A0A1A8DRB6;A0A1A8GCR2;A0A1A8KF62;A0A1A8MAY9;A0A1A8MXE6;A0A1A8QNY9;A0A1A8RNY5;A0A1A8SFC1;A0A1A8UI02;A0A060XII9;A0A060XJX9;A0A087XQU7;A0A146NIL5;A0A146NIU7;A0A146NJR6;A0A146Q523;A0A146Z4J7;A0A146Z4L3;A0A146Z4P1;A0A146Z6F5;A0A146Z650;C0PUV6;…	1158.65	1.01947	QETFDAGLQAFQQEGITNITALKDQLLAAK		78.96	816.434	3261.71	4	4.85996	190.921
	G3Q393;A0A0R4IJ08;A0A0S7GFS1;A0A0S7GFS2;A0A0S7GFS3;A0A0S7GG64;A0A0S7GGW2;A0A0S7GGW7;A0A0S7GI92;A0A0S7GKU3;A0A0S7GLM7;A0A0S7GLW5;A0A1A7WGD9;A0A1A7Z4A6;A0A1A8AIC9;A0A1A8DRB6;A0A1A8GCR2;A0A1A8KF62;A0A1A8MAY9;A0A1A8MXE6;A0A1A8QNY9;A0A1A8RNY5;A0A1A8SFC1;A0A1A8UI02;A0A060XII9;A0A060XJX9;A0A087XQU7;A0A146NIL5;A0A146NIU7;A0A146NJR6;A0A146Q523;A0A146Z4J7;A0A146Z4L3;A0A146Z4P1;A0A146Z6F5;A0A146Z650;C0PUV6;…	176.05	1.01947	QETFDAGLQAFQQEGITNITALKDQLLAAK	[N-term] Gln->pyro-Glu (N-term Q)	77.51	1082.57	3244.68	3	4.79505	192.126
	G3Q393;A0A0P7VEP4;A0A0R4IJ08;A0A0S7GKQ9;A0A0S7GMT1;A0A0S7GRJ6;A0A1A7WGD9;A0A1A7Z4A6;A0A1A8D2Q6;A0A1A8D8C3;A0A1A8GCR2;A0A1A8I584;A0A1A8KR84;A0A1A8MAY9;A0A1A8QC83;A0A1A8SFC1;A0A1A8UI02;A0A060XII9;A0A087XQU7;A0A146Q523;A0A146Z4H1;A0A146Z4K2;A0A146Z4L3;A0A146Z4P1;A0A146Z5L2;A0A146Z6F5;A0A146Z650;F1R443;F1R446;G3Q398;H2UIA9;H2UIB0;H2UIB1;H3C0G3;H3CBT9;I3JZ89;I3JZ90;M4A8R0;Q4T9R4;Q4T9R5;W5KTF3;W5KTG2;W…	1.19251	1.01947	RAALEDSFHLQQFFR		77.08	622.323	1863.95	3	3.76403	124.952
	G3Q393;A0A0D9SGF6;A0A0P7V2T7;A0A0P7VEP4;A0A0R4IJ08;A0A0S7GFS1;A0A0S7GFS2;A0A0S7GFS3;A0A0S7GG64;A0A0S7GGW2;A0A0S7GGW7;A0A0S7GI92;A0A0S7GKU3;A0A0S7GLM7;A0A0S7GLW5;A0A1A7WGD9;A0A1A7Z4A6;A0A1A8AIC9;A0A1A8DRB6;A0A1A8GCR2;A0A1A8KF62;A0A1A8MAY9;A0A1A8MXE6;A0A1A8QNY9;A0A1A8RNY5;A0A1A8SFC1;A0A1A8UI02;A0A060XII9;A0A060XJX9;A0A087XQU7;A0A146NIL5;A0A146NIU7;A0A146NJR6;A0A146Q523;A0A146Z4J7;A0A146Z4K2;A0A146Z…	1.51824	0.852764	DLSSVQTLLTK		76.54	602.844	1203.67	2	2.8522	99.131
	G3Q393;A0A0P7VEP4;A0A0R4IJ08;A0A0S7GKQ9;A0A0S7GMT1;A0A0S7GRJ6;A0A1A7WGD9;A0A1A7Z4A6;A0A1A8D2Q6;A0A1A8D8C3;A0A1A8GCR2;A0A1A8I584;A0A1A8KR84;A0A1A8MAY9;A0A1A8QC83;A0A1A8SFC1;A0A1A8UI02;A0A060XII9;A0A060XJX9;A0A087XQU7;A0A146Q523;A0A146Z4H1;A0A146Z4K2;A0A146Z4L3;A0A146Z4P1;A0A146Z5L2;A0A146Z6F5;A0A146Z650;F1R443;F1R446;G3Q398;H2MBY2;H2UIA9;H2UIB0;H2UIB1;H3C0G3;H3CBT9;I3JZ89;I3JZ90;M4A8R0;Q4T9R4;Q4T9…	1.13379	1.01947	DSDELKSWINEK		75.04	732.356	1462.7	2	5.36109	70.5467
	G3Q393;A0A0D9SGF6;A0A0P7V2T7;A0A0P7VEP4;A0A0R4IJ08;A0A0S7GFS1;A0A0S7GFS2;A0A0S7GFS3;A0A0S7GG64;A0A0S7GGW2;A0A0S7GGW7;A0A0S7GI92;A0A0S7GKU3;A0A0S7GLM7;A0A0S7GLW5;A0A1A7WGD9;A0A1A7Z4A6;A0A1A8AIC9;A0A1A8DRB6;A0A1A8GCR2;A0A1A8KF62;A0A1A8MAY9;A0A1A8MXE6;A0A1A8QNY9;A0A1A8RNY5;A0A1A8SFC1;A0A1A8UI02;A0A060XII9;A0A060XJX9;A0A087XQU7;A0A146NIL5;A0A146NIU7;A0A146NJR6;A0A146Q523;A0A146Z4J7;A0A146Z4K2;A0A146Z…	1.03818	0.845309	ASAFNSWFENAEEDLTDPVR		74.24	1149.52	2297.03	2	4.16893	161.833
	G3Q393;A0A0D9SGF6;A0A0P7VEP4;A0A0R4IJ08;A0A0S7GFR3;A0A0S7GFS2;A0A0S7GG64;A0A0S7GKU3;A0A0S7GLM7;A0A1A7WGD9;A0A1A7Z4A6;A0A1A8D2Q6;A0A1A8GCR2;A0A1A8I584;A0A1A8KR84;A0A1A8MXE6;A0A1A8QNY9;A0A1A8SFC1;A0A060XII9;A0A146NIL5;A0A146NIU7;A0A146NJR6;A0A146Q523;A0A146Z4H1;A0A146Z4J7;A0A146Z4K2;A0A146Z4L3;A0A146Z4P1;A0A146Z5L2;A0A146Z6F5;A0A146Z650;F1R443;F1R446;G3Q398;H2MBY2;H2UIA9;H2UIB0;H2UIB1;H3C0G3;H3CBT9…	9.89134	42.8179	KGDILTLLNSTNKDWWK		73.99	678.035	2031.08	3	1.34542	153.628
	G3Q393;A0A0D9SGF6;A0A0P7VEP4;A0A0R4IJ08;A0A0S7GKE8;A0A0S7GMT1;A0A0S7GQA6;A0A1A7WGD9;A0A1A7Z4A6;A0A1A8D2Q6;A0A1A8D8C3;A0A1A8GCR2;A0A1A8I584;A0A1A8KR84;A0A1A8MAY9;A0A1A8QC83;A0A1A8SFC1;A0A1A8UI02;A0A060XII9;A0A060XJX9;A0A087XQU7;A0A146Q523;A0A146Z4H1;A0A146Z4K2;A0A146Z4L3;A0A146Z4P1;A0A146Z5L2;A0A146Z6F5;A0A146Z650;F1R443;F1R446;G3Q398;I3JZ89;I3JZ90;M4A8R0;Q566W8;Q13813;W5KTF3;W5KTG2;W5MFM2;W5MFP4	2.07143	0.191413	DLTSWVTEMK		73.73	605.296	1208.58	2	6.47796	114.66
	G3Q393;A0A0D9SGF6;A0A0P7V2T7;A0A0R4IJ08;A0A060XJX9;A0A146Q523;A0A146Z4H1;A0A146Z4J7;A0A146Z4K2;A0A146Z4L3;A0A146Z4P1;A0A146Z5L2;A0A146Z6F5;A0A146Z650;F1QDX2;F1R443;F1R446;G3Q398;H2MBY2;H3C0G3;H3CBT9;I3JZ89;I3JZ90;Q4T9R4;Q4T9R5;Q13813;W5KTF3;W5KTG2;W5MFM2;W5MFP4	1.34405	1.11579	DLAALGDKVNSLGETAER		73.23	620.321	1857.94	3	0.633634	86.0829
	G3Q393;A0A0P7VEP4;A0A1A7Z4A6;A0A1A8D2Q6;A0A1A8D8C3;A0A1A8GCR2;A0A1A8I584;A0A1A8KR84;A0A1A8MAY9;A0A1A8QC83;A0A1A8SFC1;A0A1A8UI02;A0A060XII9;A0A060XJX9;G3Q398;W5MFM2;W5MFP4	375.95	325.392	HQAFEAEVQANAGAIIK		72.73	599.649	1795.92	3	2.76581	83.9641
	G3Q393;A0A060XII9;A0A060XJX9;G3Q398;I3JZ89;I3JZ90;W5KTF3;W5KTG2	0.123332	250.724	SGQELLDGK		71.5	473.745	945.476	2	-3.85457	25.547
	G3Q393;A0A0R4IJ08;A0A0S7GFQ8;A0A0S7GFR3;A0A0S7GFS1;A0A0S7GFS2;A0A0S7GFS3;A0A0S7GFT9;A0A0S7GG64;A0A0S7GGW2;A0A0S7GGW7;A0A0S7GKU3;A0A0S7GLM7;A0A0S7GNH5;A0A1A7WGD9;A0A1A7Z4A6;A0A1A8AIC9;A0A1A8DRB6;A0A1A8GCR2;A0A1A8KF62;A0A1A8MAY9;A0A1A8MXE6;A0A1A8QNY9;A0A1A8RNY5;A0A1A8SFC1;A0A1A8UI02;A0A060XII9;A0A060XJX9;A0A087XQU7;A0A146NIL5;A0A146NIU7;A0A146NJR6;A0A146Q523;A0A146Z4H1;A0A146Z4J7;A0A146Z4K2;A0A146Z…	1.2166	0.487952	EAFLASDDKGDSLDSVEALIK		71.06	741.709	2222.11	3	2.41343	138.153
	G3Q393;A0A0D9SGF6;A0A0P7V2T7;A0A0P7VEP4;A0A0R4IJ08;A0A0S7GFS2;A0A0S7GFS3;A0A0S7GGW7;A0A0S7GI92;A0A0S7GKU3;A0A1A7WGD9;A0A1A7Z4A6;A0A1A8AIC9;A0A1A8DRB6;A0A1A8GCR2;A0A1A8KF62;A0A1A8MAY9;A0A1A8MXE6;A0A1A8QNY9;A0A1A8RNY5;A0A1A8SFC1;A0A1A8UI02;A0A060XII9;A0A060XJX9;A0A087XQU7;A0A146NIU7;A0A146Q523;A0A146Z4J7;A0A146Z4L3;A0A146Z4P1;A0A146Z6F5;A0A146Z650;C0PUV6;F1R443;F1R445;F1R446;F8K8N3;G3Q398;H2MBY2;H2…	748.413	24.6248	KIEDLGAAMEEALILDNK		70.83	987.022	1972.03	2	5.20131	152.693
	G3Q393;A0A0D9SGF6;A0A0P7V2T7;A0A0P7VEP4;A0A0R4IJ08;A0A0S7GFR3;A0A0S7GFS2;A0A0S7GG64;A0A0S7GKU3;A0A0S7GLM7;A0A1A7WGD9;A0A1A7Z4A6;A0A1A8D2Q6;A0A1A8GCR2;A0A1A8I584;A0A1A8KR84;A0A1A8MAY9;A0A1A8SFC1;A0A060XII9;A0A060XJX9;A0A087XQU7;A0A146NIL5;A0A146NIU7;A0A146NJR6;A0A146Q523;A0A146Z4H1;A0A146Z4J7;A0A146Z4L3;A0A146Z4P1;A0A146Z5L2;A0A146Z6F5;A0A146Z650;F1R443;F1R446;G3Q398;H2MBY2;H2UIA9;H2UIB0;H2UIB1;H3…	0.646554	0.72502	GKDLIGVQNLLK		69.7	649.397	1296.78	2	-1.08841	96.0961
	G3Q393;A0A060XII9;A0A060XJX9;C0PUV6;G3Q398;H2UGD2	0.991535	1.2877	EELYQNLSK		69.51	562.289	1122.56	2	2.28799	40.4952
	G3Q393;A0A0P7VEP4;A0A0R4IJ08;A0A060XII9;A0A060XJX9;F1R443;F1R446;G3Q398;H2UIA9;H2UIB0;H2UIB1;H3C0G3;H3CBT9;I3JZ89;I3JZ90;Q4T9R4;W5KTF3;W5KTG2;W5MFM2;W5MFP4	0.109469	1.64738	LLVSSEDYGR		68.99	569.792	1137.57	2	-0.811243	46.0808
	G3Q393;A0A0D9SGF6;A0A0P7V2T7;A0A0P7VEP4;A0A0R4IJ08;A0A060XII9;A0A060XJX9;F1R443;F1R446;G3Q398;H2UIA9;H2UIB0;H2UIB1;H3C0G3;H3CBT9;I3JZ89;I3JZ90;Q4T9R4;Q4T9R5;Q13813;W5KTF3;W5KTG2;W5MFM2;W5MFP4	0.996473	0.855391	TATDEAYKDPSNLQGK		67.48	579.948	1736.82	3	2.06475	28.4351
	G3Q393;A0A0D9SGF6;A0A0P7VEP4;A0A0R4IJ08;A0A0S7GFR3;A0A0S7GFS1;A0A0S7GFS2;A0A0S7GFS3;A0A0S7GG64;A0A0S7GGW2;A0A0S7GGW7;A0A0S7GKU3;A0A0S7GLM7;A0A0S7GNH5;A0A1A7WGD9;A0A1A7Z4A6;A0A1A8AIC9;A0A1A8DRB6;A0A1A8GCR2;A0A1A8KF62;A0A1A8MAY9;A0A1A8MXE6;A0A1A8QNY9;A0A1A8RNY5;A0A1A8SFC1;A0A1A8UI02;A0A060XII9;A0A060XJX9;A0A087XQU7;A0A146NIL5;A0A146NIU7;A0A146NJR6;A0A146Q523;A0A146Z4H1;A0A146Z4J7;A0A146Z4K2;A0A146Z…	1.68847	1.87492	DLMSWINGIR		67.46	602.812	1203.61	2	-0.298836	155.21
	G3Q393;A0A0D9SGF6;A0A0P7V2T7;A0A0P7VEP4;A0A0R4IJ08;A0A0S7GFS1;A0A0S7GFS2;A0A0S7GFS3;A0A0S7GG64;A0A0S7GGW2;A0A0S7GGW7;A0A0S7GI92;A0A0S7GKU3;A0A0S7GLM7;A0A0S7GLW5;A0A1A7WGD9;A0A1A7Z4A6;A0A1A8AIC9;A0A1A8DRB6;A0A1A8GCR2;A0A1A8KF62;A0A1A8MAY9;A0A1A8MXE6;A0A1A8QNY9;A0A1A8RNY5;A0A1A8SFC1;A0A1A8UI02;A0A060XII9;A0A060XJX9;A0A087XQU7;A0A146NIL5;A0A146NIU7;A0A146NJR6;A0A146Q523;A0A146Z4J7;A0A146Z4K2;A0A146Z…	44.1651	0.424204	ASAFNSWFENAEEDLTDPVR		66.91	766.686	2297.04	3	6.9364	164.274
	G3Q393;A0A1A7WGD9;A0A1A7Z4A6;A0A1A8AIC9;A0A1A8DRB6;A0A1A8GCR2;A0A1A8KF62;A0A1A8MAY9;A0A1A8MXE6;A0A1A8QNY9;A0A1A8RNY5;A0A1A8SFC1;A0A1A8UI02;A0A060XII9;A0A060XJX9;G3Q398;H2MBY2;H2UIA9;H2UIB0;H2UIB1;H3C0G3;H3CBT9;I3JZ89;I3JZ90;Q4T9R4;W5KTF3;W5KTG2	1.11623	0.116383	GHYASPEIQQK		66.23	419.88	1256.62	3	6.94991	21.7151
	G3Q393;A0A0D9SGF6;A0A0P7V2T7;A0A0P7VEP4;A0A0R4IJ08;A0A0S7GFR3;A0A0S7GFS2;A0A0S7GG64;A0A0S7GKU3;A0A0S7GLM7;A0A1A7WGD9;A0A1A7Z4A6;A0A1A8D2Q6;A0A1A8D8C3;A0A1A8GCR2;A0A1A8I584;A0A1A8KR84;A0A1A8MAY9;A0A1A8QC83;A0A1A8SFC1;A0A060XJX9;A0A087XQU7;A0A146NIL5;A0A146NIU7;A0A146NJR6;A0A146Q523;A0A146Z4H1;A0A146Z4J7;A0A146Z4K2;A0A146Z4L3;A0A146Z4P1;A0A146Z5L2;A0A146Z6F5;A0A146Z650;F1R443;F1R446;G3Q398;H2MBY2;H…	1.77112	0.00401734	DVEDEETWIR		65.86	646.296	1290.58	2	5.49503	68.6247
	G3Q393;A0A0P7VEP4;A0A0R4IJ08;A0A0S7GFS1;A0A0S7GFS2;A0A0S7GFS3;A0A0S7GG64;A0A0S7GGW2;A0A0S7GGW7;A0A0S7GI92;A0A0S7GKU3;A0A0S7GLM7;A0A0S7GLW5;A0A1A7WGD9;A0A1A7Z4A6;A0A1A8AIC9;A0A1A8DRB6;A0A1A8GCR2;A0A1A8KF62;A0A1A8MAY9;A0A1A8MXE6;A0A1A8QNY9;A0A1A8RNY5;A0A1A8SFC1;A0A1A8UI02;A0A060XII9;A0A060XJX9;A0A087XQU7;A0A146NIL5;A0A146NIU7;A0A146NJR6;A0A146Q523;A0A146Z4J7;A0A146Z4K2;A0A146Z4L3;A0A146Z4P1;A0A146Z…	357.792	2.6172	CNSLEEIR	[1] Methylthio (C)	65.69	505.229	1008.44	2	4.26409	42.7674
	G3Q393;A0A0D9SGF6;A0A0P7V2T7;A0A0R4IJ08;A0A060XJX9;A0A146Q523;A0A146Z4H1;A0A146Z4J7;A0A146Z4K2;A0A146Z4L3;A0A146Z4P1;A0A146Z5L2;A0A146Z6F5;A0A146Z650;F1QDX2;F1R443;F1R446;G3Q398;H2MBY2;H3C0G3;H3CBT9;I3JZ89;I3JZ90;Q4T9R4;Q4T9R5;Q13813;W5KTF3;W5KTG2;W5MFM2;W5MFP4	1.01779	0.0478746	VNSLGETAER		65.66	538.272	1074.53	2	-0.776137	20.515
	G3Q393;A0A0D9SGF6;A0A0P7V2T7;A0A0P7VEP4;A0A0R4IJ08;A0A0S7GKQ9;A0A0S7GMT1;A0A0S7GRJ6;A0A1A7WGD9;A0A1A7Z4A6;A0A1A8D2Q6;A0A1A8D8C3;A0A1A8GCR2;A0A1A8I584;A0A1A8KR84;A0A1A8MAY9;A0A1A8QC83;A0A1A8SFC1;A0A1A8UI02;A0A060XII9;A0A060XJX9;A0A087XQU7;A0A146Q523;A0A146Z4H1;A0A146Z4K2;A0A146Z4L3;A0A146Z4P1;A0A146Z5L2;A0A146Z6F5;A0A146Z650;F1R443;F1R446;G3Q398;H2MBY2;H2UIA9;H2UIB0;H2UIB1;H3C0G3;H3CBT9;I3JZ89;I3J…	0.821047	1.11662	ITALDEFATK		65	554.791	1107.57	2	-11.0637	72.3097
	G3Q393;A0A0P7VEP4;A0A0R4IJ08;A0A0S7GFQ2;A0A0S7GFQ8;A0A0S7GFR3;A0A0S7GFS1;A0A0S7GFS2;A0A0S7GFS3;A0A0S7GG64;A0A0S7GGW2;A0A0S7GGW7;A0A0S7GI92;A0A0S7GKU3;A0A0S7GLM7;A0A0S7GLW5;A0A0S7GNH5;A0A1A7WGD9;A0A1A7Z4A6;A0A1A8AIC9;A0A1A8DRB6;A0A1A8GCR2;A0A1A8KF62;A0A1A8MAY9;A0A1A8MXE6;A0A1A8QNY9;A0A1A8RNY5;A0A1A8SFC1;A0A1A8UI02;A0A060XII9;A0A060XJX9;A0A087XQU7;A0A146NIL5;A0A146NIU7;A0A146NJR6;A0A146Q523;A0A146Z…	1.55949	1.01947	DLDDEESWIKEK		64.98	502.906	1505.7	3	3.79862	67.8497
	G3Q393;A0A0D9SGF6;A0A0P7V2T7;A0A0P7VEP4;A0A0R4IJ08;A0A0S7GFS2;A0A0S7GFS3;A0A0S7GGW7;A0A0S7GI92;A0A0S7GKU3;A0A1A7WGD9;A0A1A7Z4A6;A0A1A8AIC9;A0A1A8DRB6;A0A1A8GCR2;A0A1A8KF62;A0A1A8MAY9;A0A1A8MXE6;A0A1A8QNY9;A0A1A8RNY5;A0A1A8SFC1;A0A1A8UI02;A0A060XII9;A0A060XJX9;A0A087XQU7;A0A146NIU7;A0A146Q523;A0A146Z4J7;A0A146Z4L3;A0A146Z4P1;A0A146Z6F5;A0A146Z650;C0PUV6;F1R443;F1R445;F1R446;F8K8N3;G3Q398;H2MBY2;H2…	0.00150252	0.0161301	MQHNLEQQIQAR		63.72	499.254	1494.74	3	-0.210263	31.0477
	G3Q393;A0A0P7VEP4;A0A0R4IJ08;A0A0S7GFR3;A0A0S7GFS1;A0A0S7GFS2;A0A0S7GFS3;A0A0S7GG64;A0A0S7GGW2;A0A0S7GGW7;A0A0S7GKU3;A0A0S7GLM7;A0A0S7GNH5;A0A1A7WGD9;A0A1A7Z4A6;A0A1A8AIC9;A0A1A8DRB6;A0A1A8GCR2;A0A1A8KF62;A0A1A8MAY9;A0A1A8MXE6;A0A1A8QNY9;A0A1A8RNY5;A0A1A8SFC1;A0A1A8UI02;A0A060XII9;A0A060XJX9;A0A087XQU7;A0A146NIL5;A0A146NIU7;A0A146NJR6;A0A146Q523;A0A146Z4H1;A0A146Z4J7;A0A146Z4K2;A0A146Z4L3;A0A146Z…	1.51961	32.2562	LIQSHPEAVDDIQEK		63.33	574.629	1720.86	3	2.61635	42.2722
	G3Q393;A0A0P7V2T7;A0A0P7VEP4;A0A0R4IJ08;A0A0S7GKE8;A0A0S7GMT1;A0A0S7GQA6;A0A1A7WGD9;A0A1A7Z4A6;A0A1A8D2Q6;A0A1A8D8C3;A0A1A8GCR2;A0A1A8I584;A0A1A8KR84;A0A1A8MAY9;A0A1A8QC83;A0A1A8SFC1;A0A1A8UI02;A0A060XII9;A0A060XJX9;A0A087XQU7;A0A146Q523;A0A146Z4H1;A0A146Z4K2;A0A146Z4L3;A0A146Z4P1;A0A146Z5L2;A0A146Z6F5;A0A146Z650;F1R443;F1R446;G3Q398;H2MBY2;I3JZ89;I3JZ90;M4A8R0;Q566W8;W5KTF3;W5KTG2;W5MFM2;W5MFP4	4.7557	1.01947	ALINADELANDVAGAEALLDR		63.3	1077.56	2153.1	2	2.01469	185.541
	G3Q393;A0A0D9SGF6;A0A0P7VEP4;A0A0R4IJ08;A0A0S7GFR3;A0A0S7GFS2;A0A0S7GG64;A0A0S7GKU3;A0A0S7GLM7;A0A1A7WGD9;A0A1A7Z4A6;A0A1A8D2Q6;A0A1A8D8C3;A0A1A8GCR2;A0A1A8I584;A0A1A8KR84;A0A1A8MAY9;A0A1A8QC83;A0A1A8SFC1;A0A1A8UI02;A0A060XII9;A0A060XJX9;A0A087XQU7;A0A146NJR6;A0A146Q523;A0A146Z4H1;A0A146Z4J7;A0A146Z4K2;A0A146Z4L3;A0A146Z4P1;A0A146Z5L2;A0A146Z6F5;A0A146Z650;F1R443;F1R446;G3Q398;H2MBY2;H2UIA9;H2UIB…	0.908829	0.475904	HALLEADVAAHQDR		62.69	515.936	1544.79	3	10.1322	40.423
	G3Q393;A0A0R4IJ08;A0A0S7GFQ8;A0A0S7GFR3;A0A0S7GFS1;A0A0S7GFS2;A0A0S7GFS3;A0A0S7GFT9;A0A0S7GG64;A0A0S7GGW2;A0A0S7GGW7;A0A0S7GKU3;A0A0S7GLM7;A0A0S7GNH5;A0A1A7WGD9;A0A1A7Z4A6;A0A1A8AIC9;A0A1A8DRB6;A0A1A8GCR2;A0A1A8KF62;A0A1A8MAY9;A0A1A8MXE6;A0A1A8QNY9;A0A1A8RNY5;A0A1A8SFC1;A0A1A8UI02;A0A060XII9;A0A060XJX9;A0A087XQU7;A0A146NIL5;A0A146NIU7;A0A146NJR6;A0A146Q523;A0A146Z4H1;A0A146Z4J7;A0A146Z4K2;A0A146Z…	1.64574	1.01947	EAFLASDDKGDSLDSVEALIK		62.33	1112.06	2222.1	2	1.50482	138.153
	G3Q393;A0A0D9SGF6;A0A0P7VEP4;A0A0R4IJ08;A0A0S7GFQ2;A0A0S7GFQ8;A0A0S7GFR3;A0A0S7GFS1;A0A0S7GFS2;A0A0S7GFS3;A0A0S7GG64;A0A0S7GGW2;A0A0S7GGW7;A0A0S7GI92;A0A0S7GKU3;A0A0S7GLM7;A0A0S7GLW5;A0A0S7GNH5;A0A1A7WGD9;A0A1A7Z4A6;A0A1A8AIC9;A0A1A8DRB6;A0A1A8GCR2;A0A1A8KF62;A0A1A8MAY9;A0A1A8MXE6;A0A1A8QNY9;A0A1A8RNY5;A0A1A8SFC1;A0A1A8UI02;A0A060XII9;A0A060XJX9;A0A087XQU7;A0A146NIL5;A0A146NIU7;A0A146NJR6;A0A146Q…	4.71858	1.01947	LEESLEYQQFVANVEEEEAWINEK		62.07	976.131	2925.37	3	4.07214	165.566
	G3Q393;A0A0P7VEP4;A0A0R4IJ08;A0A0S7GKQ9;A0A0S7GMT1;A0A0S7GRJ6;A0A1A7WGD9;A0A1A7Z4A6;A0A1A8D2Q6;A0A1A8D8C3;A0A1A8GCR2;A0A1A8I584;A0A1A8KR84;A0A1A8MAY9;A0A1A8QC83;A0A1A8SFC1;A0A1A8UI02;A0A060XII9;A0A087XQU7;A0A146Q523;A0A146Z4H1;A0A146Z4K2;A0A146Z4L3;A0A146Z4P1;A0A146Z5L2;A0A146Z6F5;A0A146Z650;F1R443;F1R446;G3Q398;H2UIA9;H2UIB0;H2UIB1;H3C0G3;H3CBT9;I3JZ89;I3JZ90;M4A8R0;Q4T9R4;Q4T9R5;W5KTF3;W5KTG2;W…	0.396837	0.831982	AALEDSFHLQQFFR		60.37	570.291	1707.85	3	6.80052	138.511
	G3Q393;A0A0P7VEP4;A0A0R4IJ08;A0A0S7GFQ2;A0A0S7GFQ8;A0A0S7GFR3;A0A0S7GFS1;A0A0S7GFS2;A0A0S7GFS3;A0A0S7GG64;A0A0S7GGW2;A0A0S7GGW7;A0A0S7GI92;A0A0S7GKU3;A0A0S7GLM7;A0A0S7GLW5;A0A0S7GNH5;A0A1A7WGD9;A0A1A7Z4A6;A0A1A8AIC9;A0A1A8DRB6;A0A1A8GCR2;A0A1A8KF62;A0A1A8MAY9;A0A1A8MXE6;A0A1A8QNY9;A0A1A8RNY5;A0A1A8SFC1;A0A1A8UI02;A0A060XII9;A0A060XJX9;A0A087XQU7;A0A146NIL5;A0A146NIU7;A0A146NJR6;A0A146Q523;A0A146Z…	7.88007	0.0992557	DLDDEESWIK		60.1	625.285	1248.56	2	4.38244	78.0972
	G3Q393;A0A0P7V2T7;A0A0S7GFS1;A0A0S7GFS2;A0A0S7GFS3;A0A0S7GG64;A0A0S7GGW2;A0A0S7GGW7;A0A0S7GI92;A0A0S7GKU3;A0A0S7GLM7;A0A0S7GLW5;A0A1A7WGD9;A0A1A7Z4A6;A0A1A8AIC9;A0A1A8DRB6;A0A1A8GCR2;A0A1A8KF62;A0A1A8MAY9;A0A1A8MXE6;A0A1A8QNY9;A0A1A8RNY5;A0A1A8SFC1;A0A1A8UI02;A0A060XJX9;A0A146NIL5;A0A146NIU7;A0A146NJR6;A0A146Q523;A0A146Z4J7;A0A146Z4K2;A0A146Z4L3;A0A146Z4P1;A0A146Z6F5;A0A146Z650;C0PUV6;G3Q398;H2MB…	0.915266	0.700824	LLEAQEHFR		59.87	571.799	1141.58	2	-6.0651	40.3512
	G3Q393;A0A0D9SGF6;A0A0P7V2T7;A0A0P7VEP4;A0A0R4IJ08;A0A0S7GFQ2;A0A0S7GFQ8;A0A0S7GFR3;A0A0S7GFS1;A0A0S7GFS2;A0A0S7GFS3;A0A0S7GG64;A0A0S7GGW2;A0A0S7GGW7;A0A0S7GI92;A0A0S7GKU3;A0A0S7GLM7;A0A0S7GLW5;A0A0S7GNH5;A0A1A7WGD9;A0A1A7Z4A6;A0A1A8AIC9;A0A1A8DRB6;A0A1A8GCR2;A0A1A8KF62;A0A1A8MAY9;A0A1A8MXE6;A0A1A8QNY9;A0A1A8RNY5;A0A1A8SFC1;A0A1A8UI02;A0A060XII9;A0A060XJX9;A0A087XQU7;A0A146NIL5;A0A146NIU7;A0A146N…	0.128867	41.2466	HQAFEAELHANADR		59.07	536.923	1607.75	3	3.95866	36.1187
	G3Q393;A0A0R4IJ08;A0A0S7GFR3;A0A0S7GFS1;A0A0S7GFS2;A0A0S7GFS3;A0A0S7GG64;A0A0S7GGW2;A0A0S7GGW7;A0A0S7GKU3;A0A0S7GLM7;A0A0S7GNH5;A0A1A7WGD9;A0A1A7Z4A6;A0A1A8AIC9;A0A1A8DRB6;A0A1A8GCR2;A0A1A8MAY9;A0A1A8MXE6;A0A1A8QNY9;A0A1A8RNY5;A0A1A8SFC1;A0A1A8UI02;A0A060XII9;A0A060XJX9;A0A087XQU7;A0A146NIL5;A0A146NIU7;A0A146NJR6;A0A146Q523;A0A146Z4H1;A0A146Z4J7;A0A146Z4K2;A0A146Z4L3;A0A146Z4P1;A0A146Z5L2;A0A146Z…	1.11941	0.935289	SNMLGSAHEVQR		58.43	443.55	1327.63	3	-0.271899	27.1652
	G3Q393;A0A0D9SGF6;A0A0P7VEP4;A0A0R4IJ08;A0A0S7GKE8;A0A0S7GMT1;A0A0S7GQA6;A0A1A7WGD9;A0A1A7Z4A6;A0A1A8D2Q6;A0A1A8D8C3;A0A1A8GCR2;A0A1A8I584;A0A1A8KR84;A0A1A8MAY9;A0A1A8QC83;A0A1A8SFC1;A0A1A8UI02;A0A060XII9;A0A060XJX9;A0A087XQU7;A0A146Q523;A0A146Z4H1;A0A146Z4K2;A0A146Z4L3;A0A146Z4P1;A0A146Z5L2;A0A146Z6F5;F1R443;F1R446;G3Q398;H2MBY2;H2UIA9;H2UIB0;H2UIB1;H3C0G3;H3CBT9;M4A8R0;Q4T9R4;Q566W8;Q13813;W5KT…	9.5342	1.23316	EQLMASDDFGR		57.64	634.784	1267.55	2	1.9613	56.4104
	G3Q393;A0A0D9SGF6;A0A0P7VEP4;A0A0R4IJ08;A0A0S7GKE8;A0A0S7GMT1;A0A0S7GQA6;A0A1A7WGD9;A0A1A7Z4A6;A0A1A8D2Q6;A0A1A8D8C3;A0A1A8GCR2;A0A1A8I584;A0A1A8KR84;A0A1A8MAY9;A0A1A8QC83;A0A1A8SFC1;A0A1A8UI02;A0A060XII9;A0A060XJX9;A0A087XQU7;A0A146Q523;A0A146Z4H1;A0A146Z4K2;A0A146Z4L3;A0A146Z4P1;A0A146Z5L2;A0A146Z6F5;F1R443;F1R446;G3Q398;H2MBY2;H2UIA9;H2UIB0;H2UIB1;H3C0G3;H3CBT9;M4A8R0;Q4T9R4;Q566W8;Q13813;W5KT…	0.0416343	6.13441	EKEQLMASDDFGRDLASVQALLR		57.25	648.836	2591.31	4	5.12752	164.992
	G3Q393;A0A0P7VEP4;A0A0R4IJ08;A0A0S7GKQ9;A0A0S7GMT1;A0A0S7GRJ6;A0A1A7WGD9;A0A1A7Z4A6;A0A1A8D2Q6;A0A1A8D8C3;A0A1A8GCR2;A0A1A8I584;A0A1A8KR84;A0A1A8MAY9;A0A1A8QC83;A0A1A8SFC1;A0A1A8UI02;A0A060XII9;A0A087XQU7;A0A146Q523;A0A146Z4H1;A0A146Z4K2;A0A146Z4L3;A0A146Z4P1;A0A146Z5L2;A0A146Z6F5;A0A146Z650;F1R443;F1R446;G3Q398;H2UIA9;H2UIB0;H2UIB1;H3C0G3;H3CBT9;I3JZ89;I3JZ90;M4A8R0;Q4T9R4;Q4T9R5;W5KTF3;W5KTG2;W…	1.03818	313.195	RAALEDSFHLQQFFR		57.22	466.997	1863.96	4	9.12968	123.824
	G3Q393;A0A0D9SGF6;A0A0P7V2T7;A0A0P7VEP4;A0A0R4IJ08;A0A0S7GFQ8;A0A0S7GFR3;A0A0S7GFS1;A0A0S7GFS2;A0A0S7GFS3;A0A0S7GFT9;A0A0S7GG64;A0A0S7GGW2;A0A0S7GGW7;A0A0S7GKU3;A0A0S7GLM7;A0A0S7GNH5;A0A1A7WGD9;A0A1A7Z4A6;A0A1A8AIC9;A0A1A8DRB6;A0A1A8GCR2;A0A1A8KF62;A0A1A8MAY9;A0A1A8MXE6;A0A1A8QNY9;A0A1A8RNY5;A0A1A8SFC1;A0A1A8UI02;A0A060XII9;A0A060XJX9;A0A087XQU7;A0A146NIL5;A0A146NIU7;A0A146NJR6;A0A146Q523;A0A146Z…	176.124	1.01947	SKLGESQTLQQFSR		57.05	804.917	1607.82	2	-6.37406	53.0722
	G3Q393;A0A0D9SGF6;A0A0P7V2T7;A0A0R4IJ08;A0A0S7GFR3;A0A0S7GFS1;A0A0S7GFS2;A0A0S7GFS3;A0A0S7GG64;A0A0S7GGW2;A0A0S7GGW7;A0A0S7GKU3;A0A0S7GLM7;A0A0S7GNH5;A0A1A7WGD9;A0A1A7Z4A6;A0A1A8AIC9;A0A1A8DRB6;A0A1A8GCR2;A0A1A8MAY9;A0A1A8MXE6;A0A1A8QNY9;A0A1A8RNY5;A0A1A8SFC1;A0A1A8UI02;A0A060XII9;A0A060XJX9;A0A087XQU7;A0A146NIL5;A0A146NIU7;A0A146NJR6;A0A146Q523;A0A146Z4H1;A0A146Z4J7;A0A146Z4K2;A0A146Z4L3;A0A146Z…	377.696	18.7436	DADETKEWIEEK		55.6	498.234	1491.68	3	7.33982	44.8114
	G3Q393;A0A0P7V2T7;A0A0S7GFR3;A0A0S7GFS1;A0A0S7GFS2;A0A0S7GFS3;A0A0S7GG64;A0A0S7GGW2;A0A0S7GGW7;A0A0S7GKU3;A0A0S7GLM7;A0A0S7GNH5;A0A1A7WGD9;A0A1A7Z4A6;A0A1A8AIC9;A0A1A8DRB6;A0A1A8GCR2;A0A1A8KF62;A0A1A8MAY9;A0A1A8MXE6;A0A1A8QNY9;A0A1A8RNY5;A0A1A8SFC1;A0A1A8UI02;A0A060XJX9;A0A087XQU7;A0A146NIL5;A0A146NIU7;A0A146NJR6;A0A146Q523;A0A146Z4H1;A0A146Z4J7;A0A146Z4K2;A0A146Z4L3;A0A146Z4P1;A0A146Z5L2;A0A146Z…	0.476975	75.7443	GLVSSEELAKDVTGAEALLER		54.75	547.545	2186.15	4	5.63577	155.21
	G3Q393;A0A0D9SGF6;A0A0P7VEP4;A0A0R4IJ08;A0A0S7GKE8;A0A0S7GMT1;A0A0S7GQA6;A0A1A7WGD9;A0A1A7Z4A6;A0A1A8D2Q6;A0A1A8D8C3;A0A1A8GCR2;A0A1A8I584;A0A1A8KR84;A0A1A8MAY9;A0A1A8QC83;A0A1A8SFC1;A0A1A8UI02;A0A060XII9;A0A060XJX9;A0A087XQU7;A0A146Q523;A0A146Z4H1;A0A146Z4K2;A0A146Z4L3;A0A146Z4P1;A0A146Z5L2;A0A146Z6F5;F1R443;F1R446;G3Q398;H2MBY2;H2UIA9;H2UIB0;H2UIB1;H3C0G3;H3CBT9;M4A8R0;Q4T9R4;Q566W8;Q13813;W5KT…	0.13822	0.0380785	EQLMASDDFGRDLASVQALLR		53.67	779.066	2334.18	3	7.43772	168.006
	G3Q393;G3Q398	11.5128	0.884338	GEAMVEEGHFAAEDVK		53.01	573.597	1717.77	3	5.08649	52.86
	G3Q393;A0A0P7VEP4;A0A0R4IJ08;A0A0S7GFR3;A0A0S7GFS1;A0A0S7GFS2;A0A0S7GFS3;A0A0S7GG64;A0A0S7GGW2;A0A0S7GGW7;A0A0S7GKU3;A0A0S7GLM7;A0A0S7GNH5;A0A1A7WGD9;A0A1A7Z4A6;A0A1A8AIC9;A0A1A8DRB6;A0A1A8GCR2;A0A1A8KF62;A0A1A8MAY9;A0A1A8MXE6;A0A1A8QNY9;A0A1A8RNY5;A0A1A8SFC1;A0A1A8UI02;A0A060XII9;A0A060XJX9;A0A087XQU7;A0A146NIL5;A0A146NIU7;A0A146NJR6;A0A146Q523;A0A146Z4H1;A0A146Z4J7;A0A146Z4K2;A0A146Z4L3;A0A146Z…	7.67321	210.65	LIQSHPEAVDDIQEK		52.66	861.44	1720.86	2	2.68113	42.2016
	G3Q393;A0A0D9SGF6;A0A0P7V2T7;A0A0P7VEP4;A0A0R4IJ08;A0A0S7GFR3;A0A0S7GFS2;A0A0S7GG64;A0A0S7GKU3;A0A0S7GLM7;A0A1A7WGD9;A0A1A7Z4A6;A0A1A8D2Q6;A0A1A8D8C3;A0A1A8GCR2;A0A1A8I584;A0A1A8KR84;A0A1A8MAY9;A0A1A8QC83;A0A1A8SFC1;A0A1A8UI02;A0A060XII9;A0A060XJX9;A0A087XQU7;A0A146NJR6;A0A146Q523;A0A146Z4H1;A0A146Z4J7;A0A146Z4K2;A0A146Z4L3;A0A146Z4P1;A0A146Z5L2;A0A146Z6F5;A0A146Z650;F1R443;F1R446;G3Q398;H2MBY2;H…	1.0417	0.0543832	LREANQQQQFNR		52.37	511.262	1530.76	3	-4.27043	20.2292
	G3Q393;A0A0D9SGF6;A0A0P7V2T7;A0A0P7VEP4;A0A0R4IJ08;A0A0S7GKE8;A0A0S7GMT1;A0A0S7GQA6;A0A1A7WGD9;A0A1A7Z4A6;A0A1A8D2Q6;A0A1A8D8C3;A0A1A8GCR2;A0A1A8I584;A0A1A8KR84;A0A1A8MAY9;A0A1A8QC83;A0A1A8SFC1;A0A1A8UI02;A0A060XII9;A0A060XJX9;A0A087XQU7;A0A146Q523;A0A146Z4H1;A0A146Z4K2;A0A146Z4L3;A0A146Z4P1;A0A146Z5L2;A0A146Z6F5;F1R443;F1R446;G3Q398;H2UIA9;H2UIB0;H2UIB1;H3C0G3;H3CBT9;I3JZ89;I3JZ90;M4A8R0;Q4T9R4;…	0.0367097	0.749109	DVDETISWIK		51.1	603.309	1204.6	2	2.06903	95.814
	G3Q393;A0A0D9SGF6;A0A0P7VEP4;A0A0R4IJ08;A0A0S7GFR3;A0A0S7GFS2;A0A0S7GG64;A0A0S7GKU3;A0A0S7GLM7;A0A1A7WGD9;A0A1A7Z4A6;A0A1A8D2Q6;A0A1A8D8C3;A0A1A8GCR2;A0A1A8I584;A0A1A8KR84;A0A1A8MAY9;A0A1A8QC83;A0A1A8SFC1;A0A1A8UI02;A0A060XII9;A0A060XJX9;A0A087XQU7;A0A146NJR6;A0A146Q523;A0A146Z4H1;A0A146Z4J7;A0A146Z4K2;A0A146Z4L3;A0A146Z4P1;A0A146Z5L2;A0A146Z6F5;A0A146Z650;F1R443;F1R446;G3Q398;H2UIA9;H2UIB0;H2UIB…	1.30642	0.821557	LLEATELK		50.6	458.772	915.529	2	-0.816887	51.8015
	G3Q393;A0A0P7VEP4;A0A0S7GKE8;A0A0S7GMT1;A0A0S7GQA6;A0A060XII9;A0A060XJX9;A0A087XQU7;G3Q398;H2MBY2;M4A8R0;W5KTF3;W5KTG2	0.00302745	0.927096	LQQTHPQNASQIHLK		50.1	581.649	1741.92	3	2.82737	28.7175
	G3Q393;A0A0D9SGF6;A0A0P7VEP4;A0A060XII9;A0A060XJX9;G3Q398;H2MBY2;H2UIA9;H2UIB0;H2UIB1;H3C0G3;H3CBT9;I3JZ89;I3JZ90;Q4T9R4;Q4T9R5;Q13813;W5KTF3;W5KTG2	0.245887	216.521	EKEPIAASTNR		49.93	405.882	1214.62	3	-5.4443	13.345
	G3Q393;A0A0P7VEP4;A0A0R4IJ08;A0A060XII9;A0A060XJX9;F1R443;F1R446;G3Q398;H2UIA9;H2UIB0;H2UIB1;H3C0G3;H3CBT9;I3JZ89;I3JZ90;Q4T9R4;W5KTF3;W5KTG2;W5MFM2;W5MFP4	0.837064	1.10897	LLVSSEDYGRDLTGVQNLR		48.03	712.376	2134.11	3	2.65968	98.3523
	G3Q393;A0A0D9SGF6;A0A0P7V2T7;A0A0P7VEP4;A0A0R4IJ08;A0A0S7GFQ2;A0A0S7GFQ8;A0A0S7GFR3;A0A0S7GFS1;A0A0S7GFS2;A0A0S7GFS3;A0A0S7GG64;A0A0S7GGW2;A0A0S7GGW7;A0A0S7GI92;A0A0S7GKU3;A0A0S7GLM7;A0A0S7GLW5;A0A0S7GNH5;A0A1A7WGD9;A0A1A7Z4A6;A0A1A8AIC9;A0A1A8DRB6;A0A1A8GCR2;A0A1A8KF62;A0A1A8MAY9;A0A1A8MXE6;A0A1A8QNY9;A0A1A8RNY5;A0A1A8SFC1;A0A1A8UI02;A0A060XII9;A0A060XJX9;A0A087XQU7;A0A146NIL5;A0A146NIU7;A0A146N…	0.953975	0.827656	DLTGVQNLR		47.62	508.28	1014.55	2	-4.07736	50.4624
	G3Q393;A0A0P7VEP4;A0A0S7GKE8;A0A0S7GMT1;A0A0S7GQA6;A0A060XII9;A0A060XJX9;A0A087XQU7;G3Q398;H2MBY2;M4A8R0;W5KTF3;W5KTG2	0.108311	0.892203	LQQTHPQNASQIHLK		47.42	436.489	1741.93	4	4.37772	28.7175
	G3Q393;A0A0D9SGF6;A0A0P7V2T7;A0A0P7VEP4;A0A0R4IJ08;A0A0S7GFQ8;A0A0S7GFR3;A0A0S7GFS1;A0A0S7GFS2;A0A0S7GFS3;A0A0S7GFT9;A0A0S7GG64;A0A0S7GGW2;A0A0S7GGW7;A0A0S7GKU3;A0A0S7GLM7;A0A0S7GNH5;A0A1A7WGD9;A0A1A7Z4A6;A0A1A8AIC9;A0A1A8DRB6;A0A1A8GCR2;A0A1A8KF62;A0A1A8MAY9;A0A1A8MXE6;A0A1A8QNY9;A0A1A8RNY5;A0A1A8SFC1;A0A1A8UI02;A0A060XII9;A0A060XJX9;A0A087XQU7;A0A146NIL5;A0A146NIU7;A0A146NJR6;A0A146Q523;A0A146Z…	11.0449	93.973	SKLGESQTLQQFSR		46.81	536.945	1607.81	3	-10.3331	53.0722
	G3Q393;A0A0P7V2T7;A0A0P7VEP4;A0A0S7GFQ8;A0A0S7GFS1;A0A0S7GFS2;A0A0S7GGW7;A0A0S7GLM7;H2UIA9;H2UIB1;H3C0G3;H3CBT9;I3JZ90	0.121808	1.26249	LQTATDESYKDPTNIQSK		44.07	680.337	2037.99	3	-0.184653	39.6378
	G3Q393;G3Q398	1.04031	8.8052	AVTQKGEAMVEEGHFAAEDVK		42.84	562.277	2245.08	4	4.12197	58.25
	G3Q393;A0A0D9SGF6;A0A0P7V2T7;A0A0P7VEP4;A0A0R4IJ08;A0A0S7GFS1;A0A0S7GFS2;A0A0S7GFS3;A0A0S7GG64;A0A0S7GGW2;A0A0S7GGW7;A0A0S7GI92;A0A0S7GKU3;A0A0S7GLM7;A0A0S7GLW5;A0A060XII9;A0A087XQU7;A0A146NIL5;A0A146NIU7;A0A146NJR6;A0A146Q523;A0A146Z4J7;A0A146Z4K2;A0A146Z4L3;A0A146Z4P1;A0A146Z6F5;A0A146Z650;C0PUV6;F1R443;F1R446;G3Q398;H2MBY2;H2UGD2;H2UIA9;H2UIB0;H2UIB1;H3C0G3;H3CBT9;I3JZ89;I3JZ90;M4A8R0;Q4T9R4;Q…	1.20725	0.827429	ENSLKTDDYGR		38.31	433.213	1296.62	3	19.998	19.9438
	G3Q393;A0A0D9SGF6;A0A0P7V2T7;A0A0P7VEP4;A0A0R4IJ08;A0A0S7GFQ8;A0A0S7GFR3;A0A0S7GFS1;A0A0S7GFS2;A0A0S7GFS3;A0A0S7GFT9;A0A0S7GG64;A0A0S7GGW2;A0A0S7GGW7;A0A0S7GKU3;A0A0S7GLM7;A0A0S7GNH5;A0A1A7WGD9;A0A1A7Z4A6;A0A1A8AIC9;A0A1A8DRB6;A0A1A8GCR2;A0A1A8KF62;A0A1A8MAY9;A0A1A8MXE6;A0A1A8QNY9;A0A1A8RNY5;A0A1A8SFC1;A0A1A8UI02;A0A060XII9;A0A060XJX9;A0A087XQU7;A0A146NIL5;A0A146NIU7;A0A146NJR6;A0A146Q523;A0A146Z…	1.03591	0.81451	LGESQTLQQFSR		37.01	465.242	1392.7	3	2.45396	58.6754
	G3Q393;A0A0D9SGF6;A0A0P7VEP4;A0A0R4IJ08;A0A0S7GFS1;A0A0S7GFS2;A0A0S7GFS3;A0A0S7GG64;A0A0S7GGW2;A0A0S7GGW7;A0A0S7GI92;A0A0S7GKU3;A0A0S7GLM7;A0A0S7GLW5;A0A1A7WGD9;A0A1A7Z4A6;A0A1A8AIC9;A0A1A8DRB6;A0A1A8GCR2;A0A1A8KF62;A0A1A8MAY9;A0A1A8MXE6;A0A1A8QNY9;A0A1A8RNY5;A0A1A8SFC1;A0A1A8UI02;A0A060XII9;A0A060XJX9;A0A087XQU7;A0A146NIL5;A0A146NIU7;A0A146NJR6;A0A146Q523;A0A146Z4J7;A0A146Z4K2;A0A146Z4L3;A0A146Z…	1.53291	0.988724	KVEDLFLTFAK		36.93	655.857	1309.7	2	-23.1591	119.386
	G3Q393;A0A0D9SGF6;A0A0P7V2T7;A0A0P7VEP4;A0A0R4IJ08;A0A0S7GFR3;A0A0S7GFS2;A0A0S7GG64;A0A0S7GKU3;A0A0S7GLM7;A0A1A7WGD9;A0A1A7Z4A6;A0A1A8D2Q6;A0A1A8GCR2;A0A1A8I584;A0A1A8KR84;A0A1A8MAY9;A0A1A8SFC1;A0A060XII9;A0A060XJX9;A0A087XQU7;A0A146NIL5;A0A146NIU7;A0A146NJR6;A0A146Q523;A0A146Z4H1;A0A146Z4J7;A0A146Z4L3;A0A146Z4P1;A0A146Z5L2;A0A146Z6F5;A0A146Z650;F1R443;F1R446;G3Q398;H2MBY2;H2UIA9;H2UIB0;H2UIB1;H3…	1.12398	1.23248	GKDLIGVQNLLKK		36.53	357.226	1424.87	4	2.74437	80.7888
	G3Q393;A0A0D9SGF6;A0A0P7V2T7;A0A0P7VEP4;A0A0R4IJ08;A0A0S7GFQ8;A0A0S7GFR3;A0A0S7GFS1;A0A0S7GFS2;A0A0S7GFS3;A0A0S7GFT9;A0A0S7GG64;A0A0S7GGW2;A0A0S7GGW7;A0A0S7GKU3;A0A0S7GLM7;A0A0S7GNH5;A0A1A7WGD9;A0A1A7Z4A6;A0A1A8AIC9;A0A1A8DRB6;A0A1A8GCR2;A0A1A8KF62;A0A1A8MAY9;A0A1A8MXE6;A0A1A8QNY9;A0A1A8RNY5;A0A1A8SFC1;A0A1A8UI02;A0A060XII9;A0A060XJX9;A0A087XQU7;A0A146NIL5;A0A146NIU7;A0A146NJR6;A0A146Q523;A0A146Z…	1.03818	173.829	KHEDFDKAINVQEEK		32.61	458.234	1828.91	4	4.44861	30.8362
G3Q398	88	1.32523	1.01947	88
	G3Q398;A0A0D9SGF6;A0A0R4IJ08;A0A0S7GFR3;A0A0S7GFS1;A0A0S7GFS2;A0A0S7GFS3;A0A0S7GG64;A0A0S7GGW2;A0A0S7GGW7;A0A0S7GKU3;A0A0S7GLM7;A0A0S7GNH5;A0A1A7WGD9;A0A1A7Z4A6;A0A1A8GCR2;A0A1A8MAY9;A0A1A8MXE6;A0A1A8QNY9;A0A1A8RNY5;A0A1A8SFC1;A0A060XII9;A0A060XJX9;A0A087XQU7;A0A146NIL5;A0A146NIU7;A0A146NJR6;A0A146Q523;A0A146Z4H1;A0A146Z4J7;A0A146Z4K2;A0A146Z4L3;A0A146Z4P1;A0A146Z5L2;A0A146Z6F5;A0A146Z650;F1QDX2;…	1.10634	0.946459	NQALNTDNYGHDLASVQALQR		127.8	776.717	2327.13	3	-0.924291	82.1301
	G3Q398;A0A0P7V2T7;A0A0S7GFR3;A0A0S7GFS1;A0A0S7GFS2;A0A0S7GFS3;A0A0S7GG64;A0A0S7GGW2;A0A0S7GGW7;A0A0S7GKU3;A0A0S7GLM7;A0A0S7GNH5;A0A1A7WGD9;A0A1A7Z4A6;A0A1A8AIC9;A0A1A8DRB6;A0A1A8GCR2;A0A1A8KF62;A0A1A8MAY9;A0A1A8MXE6;A0A1A8QNY9;A0A1A8RNY5;A0A1A8SFC1;A0A1A8UI02;A0A060XJX9;A0A087XQU7;A0A146NIL5;A0A146NIU7;A0A146NJR6;A0A146Q523;A0A146Z4H1;A0A146Z4J7;A0A146Z4K2;A0A146Z4L3;A0A146Z4P1;A0A146Z5L2;A0A146Z…	0.000970093	0.480679	GLVSSEELAKDVTGAEALLER		115.99	729.722	2186.15	3	2.34333	162.693
	G3Q398;A0A0R4IJ08;A0A0S7GFS1;A0A0S7GFS2;A0A0S7GFS3;A0A0S7GG64;A0A0S7GGW2;A0A0S7GGW7;A0A0S7GI92;A0A0S7GKU3;A0A0S7GLM7;A0A0S7GLW5;A0A1A7WGD9;A0A1A7Z4A6;A0A1A8AIC9;A0A1A8DRB6;A0A1A8GCR2;A0A1A8KF62;A0A1A8MAY9;A0A1A8MXE6;A0A1A8QNY9;A0A1A8RNY5;A0A1A8SFC1;A0A1A8UI02;A0A060XII9;A0A060XJX9;A0A087XQU7;A0A146NIL5;A0A146NIU7;A0A146NJR6;A0A146Q523;A0A146Z4J7;A0A146Z4K2;A0A146Z4L3;A0A146Z4P1;A0A146Z6F5;A0A146Z…	1.12788	1556.08	LNLVGSEDYGDTLAAVQGLLK		115.77	726.054	2175.14	3	0.603017	171.724
	G3Q398;A0A060XII9;A0A060XJX9;G3Q393;H2UIA9;H2UIB0;H2UIB1;I3JZ89;I3JZ90	1.50932	0.826446	LGALDEQWQFLVNK		110.33	830.941	1659.87	2	3.97313	140.23
	G3Q398;A0A0R4IJ08;A0A0S7GFS1;A0A0S7GFS2;A0A0S7GFS3;A0A0S7GG64;A0A0S7GGW2;A0A0S7GGW7;A0A0S7GI92;A0A0S7GKU3;A0A0S7GLM7;A0A0S7GLW5;A0A1A7WGD9;A0A1A7Z4A6;A0A1A8AIC9;A0A1A8DRB6;A0A1A8GCR2;A0A1A8KF62;A0A1A8MAY9;A0A1A8MXE6;A0A1A8QNY9;A0A1A8RNY5;A0A1A8SFC1;A0A1A8UI02;A0A060XII9;A0A060XJX9;A0A087XQU7;A0A146NIL5;A0A146NIU7;A0A146NJR6;A0A146Q523;A0A146Z4J7;A0A146Z4K2;A0A146Z4L3;A0A146Z4P1;A0A146Z6F5;A0A146Z…	16.1158	1.01947	LNLVGSEDYGDTLAAVQGLLK		109.97	1088.58	2175.15	2	6.71343	175.929
	G3Q398;A0A0D9SGF6;A0A0P7V2T7;A0A0P7VEP4;A0A0R4IJ08;A0A0S7GFS1;A0A0S7GFS2;A0A0S7GFS3;A0A0S7GG64;A0A0S7GGW2;A0A0S7GGW7;A0A0S7GI92;A0A0S7GKU3;A0A0S7GLM7;A0A0S7GLW5;A0A1A7WGD9;A0A1A7Z4A6;A0A1A8AIC9;A0A1A8DRB6;A0A1A8GCR2;A0A1A8KF62;A0A1A8MAY9;A0A1A8MXE6;A0A1A8QNY9;A0A1A8RNY5;A0A1A8SFC1;A0A1A8UI02;A0A1B0GV13;A0A060XII9;A0A060XJX9;A0A087XQU7;A0A146NIL5;A0A146NIU7;A0A146NJR6;A0A146Q523;A0A146Z4J7;A0A146Z…	1.62303	0.582025	LDENSAFLQFNWK		109.63	806.398	1610.78	2	7.24726	133.8
	G3Q398;A0A0P7V2T7;A0A0P7VEP4;A0A0R4IJ08;A0A0S7GKE8;A0A0S7GMT1;A0A0S7GQA6;A0A1A7WGD9;A0A1A7Z4A6;A0A1A8D2Q6;A0A1A8D8C3;A0A1A8GCR2;A0A1A8I584;A0A1A8KR84;A0A1A8MAY9;A0A1A8QC83;A0A1A8SFC1;A0A1A8UI02;A0A060XII9;A0A060XJX9;A0A087XQU7;A0A146Q523;A0A146Z4H1;A0A146Z4K2;A0A146Z4L3;A0A146Z4P1;A0A146Z5L2;A0A146Z6F5;A0A146Z650;F1R443;F1R446;G3Q393;H2MBY2;I3JZ89;I3JZ90;M4A8R0;Q566W8;W5KTF3;W5KTG2;W5MFM2;W5MFP4	3.19093	1.85266	ALINADELANDVAGAEALLDR		107	718.709	2153.11	3	2.54416	185.541
	G3Q398;A0A0D9SGF6;A0A0P7V2T7;A0A0P7VEP4;A0A0R4IJ08;A0A0S7GFS2;A0A0S7GFS3;A0A0S7GGW7;A0A0S7GI92;A0A0S7GKU3;A0A1A7WGD9;A0A1A7Z4A6;A0A1A8AIC9;A0A1A8DRB6;A0A1A8GCR2;A0A1A8KF62;A0A1A8MAY9;A0A1A8MXE6;A0A1A8QNY9;A0A1A8RNY5;A0A1A8SFC1;A0A1A8UI02;A0A060XII9;A0A060XJX9;A0A087XQU7;A0A146NIU7;A0A146Q523;A0A146Z4J7;A0A146Z4L3;A0A146Z4P1;A0A146Z6F5;A0A146Z650;C0PUV6;F1R443;F1R445;F1R446;F8K8N3;G3Q393;H2MBY2;H2…	2.21306	2.37499	IEDLGAAMEEALILDNK		106.2	922.972	1843.93	2	5.60561	153.845
	G3Q398;A0A0D9SGF6;A0A0P7V2T7;A0A0P7VEP4;A0A0R4IJ08;A0A0S7GFS2;A0A0S7GFS3;A0A0S7GGW7;A0A0S7GI92;A0A0S7GKU3;A0A1A7WGD9;A0A1A7Z4A6;A0A1A8AIC9;A0A1A8DRB6;A0A1A8GCR2;A0A1A8KF62;A0A1A8MAY9;A0A1A8MXE6;A0A1A8QNY9;A0A1A8RNY5;A0A1A8SFC1;A0A1A8UI02;A0A060XII9;A0A060XJX9;A0A087XQU7;A0A146NIU7;A0A146Q523;A0A146Z4J7;A0A146Z4L3;A0A146Z4P1;A0A146Z6F5;A0A146Z650;C0PUV6;F1R443;F1R445;F1R446;F8K8N3;G3Q393;H2MBY2;H2…	12.4474	0.768997	KIEDLGAAMEEALILDNK		99.23	658.351	1972.03	3	5.84731	152.693
	G3Q398;A0A0D9SGF6;A0A0P7V2T7;A0A0P7VEP4;A0A0R4IJ08;A0A0S7GFR3;A0A0S7GFS2;A0A0S7GG64;A0A0S7GKU3;A0A0S7GLM7;A0A1A7WGD9;A0A1A7Z4A6;A0A1A8D2Q6;A0A1A8GCR2;A0A1A8I584;A0A1A8KR84;A0A1A8MXE6;A0A1A8QNY9;A0A1A8SFC1;A0A060XII9;A0A060XJX9;A0A146NIL5;A0A146NIU7;A0A146NJR6;A0A146Q523;A0A146Z4H1;A0A146Z4J7;A0A146Z4K2;A0A146Z4L3;A0A146Z4P1;A0A146Z5L2;A0A146Z6F5;A0A146Z650;F1R443;F1R446;G3Q393;H2UIB0;H2UIB1;H3CBT…	1.03818	2427.31	QQVAPTDDETGKELVLALYDYQEK		96.33	918.458	2752.35	3	4.07101	131.026
	G3Q398;A0A0D9SGF6;A0A0P7V2T7;A0A0R4IJ08;A0A0S7GFR3;A0A0S7GFS2;A0A0S7GG64;A0A0S7GKU3;A0A0S7GLM7;A0A1A7WGD9;A0A1A7Z4A6;A0A1A8D2Q6;A0A1A8D8C3;A0A1A8GCR2;A0A1A8I584;A0A1A8KR84;A0A1A8MAY9;A0A1A8RNY5;A0A1A8SFC1;A0A060XII9;A0A060XJX9;A0A087XQU7;F1R443;F1R446;G3Q393;H2MBY2;I3JZ89;I3JZ90;M4A8R0;Q13813;W5KTF3;W5KTG2;W5MFM2;W5MFP4	1.03818	1.24516	RQDLEDSLQAQQYFADANEAESWMR		95.41	1001.12	3000.34	3	4.19052	134.37
	G3Q398;A0A0D9SGF6;A0A0P7V2T7;A0A0P7VEP4;A0A0R4IJ08;A0A1A7WGD9;A0A1A7Z4A6;A0A1A8D2Q6;A0A1A8D8C3;A0A1A8GCR2;A0A1A8I584;A0A1A8KR84;A0A1A8MAY9;A0A1A8QC83;A0A1A8SFC1;A0A1A8UI02;A0A060XII9;A0A060XJX9;A0A087XQU7;A0A146Q523;A0A146Z4H1;A0A146Z4J7;A0A146Z4K2;A0A146Z4L3;A0A146Z4P1;A0A146Z5L2;A0A146Z6F5;A0A146Z650;F1R443;F1R446;G3Q393;H2MBY2;H2UIA9;H2UIB0;H2UIB1;H3C0G3;H3CBT9;I3JZ89;I3JZ90;M4A8R0;Q4T9R4;Q4T9…	1.02938	1.07542	HQAFEAELSANQSR		92.43	529.923	1586.75	3	4.18109	40.423
	G3Q398;A0A0D9SFH4;A0A0D9SGF6;A0A0P7V2T7;A0A0P7VEP4;A0A0R4IJ08;A0A0S7GFS2;A0A0S7GFS3;A0A0S7GGW7;A0A0S7GI92;A0A0S7GKU3;A0A1A7WGD9;A0A1A7Z4A6;A0A1A8AIC9;A0A1A8DRB6;A0A1A8GCR2;A0A1A8KF62;A0A1A8MAY9;A0A1A8MXE6;A0A1A8QNY9;A0A1A8RNY5;A0A1A8SFC1;A0A1A8UI02;A0A060XII9;A0A060XJX9;A0A087XQU7;A0A146NIU7;A0A146Q523;A0A146Z4J7;A0A146Z4L3;A0A146Z4P1;A0A146Z650;C0PUV6;F1R443;F1R445;F1R446;F8K8N3;G3Q393;H2MBY2;H2…	1.80805	0.865306	SSEEIESAFR		88.75	577.771	1153.53	2	-1.61916	51.3788
	G3Q398;A0A0P7VEP4;A0A0R4IJ08;A0A0S7GFS1;A0A0S7GFS2;A0A0S7GFS3;A0A0S7GG64;A0A0S7GGW2;A0A0S7GGW7;A0A0S7GI92;A0A0S7GKU3;A0A0S7GLM7;A0A0S7GLW5;A0A1A7WGD9;A0A1A7Z4A6;A0A1A8AIC9;A0A1A8DRB6;A0A1A8GCR2;A0A1A8KF62;A0A1A8MAY9;A0A1A8MXE6;A0A1A8QNY9;A0A1A8RNY5;A0A1A8SFC1;A0A1A8UI02;A0A060XII9;A0A060XJX9;A0A087XQU7;A0A146NIL5;A0A146NIU7;A0A146NJR6;A0A146Q523;A0A146Z4J7;A0A146Z4K2;A0A146Z4L3;A0A146Z4P1;A0A146Z…	145.971	0.577478	QETFDAGLQAFQQEGITNITALK		88.67	841.766	2522.28	3	3.03161	153.268
	G3Q398;A0A0D9SGF6;A0A0P7VEP4;A0A0R4IJ08;A0A0S7GFS2;A0A0S7GFS3;A0A0S7GGW7;A0A0S7GI92;A0A0S7GKU3;A0A1A7WGD9;A0A1A7Z4A6;A0A1A8AIC9;A0A1A8DRB6;A0A1A8GCR2;A0A1A8KF62;A0A1A8MAY9;A0A1A8MXE6;A0A1A8QNY9;A0A1A8RNY5;A0A1A8SFC1;A0A1A8UI02;A0A060XII9;A0A060XJX9;A0A087XQU7;A0A146NIU7;A0A146Q523;A0A146Z4J7;A0A146Z4L3;A0A146Z4P1;A0A146Z6F5;A0A146Z650;C0PUV6;F1R443;F1R445;F1R446;F8K8N3;G3Q393;H2MBY2;H2UGD2;H3C0G3…	0.233289	0.00119199	YTEHSTVGLAQQWDQLDQLGMR		87.43	859.415	2575.22	3	5.41344	132.586
	G3Q398;A0A0D9SGF6;A0A0P7VEP4;A0A0R4IJ08;A0A060XII9;A0A060XJX9;F1R443;F1R446;G3Q393;H2UIA9;H2UIB0;H2UIB1;H3C0G3;H3CBT9;I3JZ89;I3JZ90;Q4T9R4;Q4T9R5;Q566W8;Q13813;W5KTF3;W5KTG2;W5MFM2;W5MFP4	1.14844	0.843343	LFGAAEVQR		87	495.772	989.53	2	0.100762	47.4206
	G3Q398;A0A0D9SGF6;A0A0P7V2T7;A0A0R4IJ08;A0A1A7WGD9;A0A1A7Z4A6;A0A1A8D2Q6;A0A1A8GCR2;A0A1A8I584;A0A1A8KR84;A0A1A8MXE6;A0A1A8QNY9;A0A1A8SFC1;A0A060XII9;A0A060XJX9;F1R443;F1R446;G3Q393;Q13813;W5KTF3;W5KTG2	1.54542	1.00188	EANELQQWINEK		84.85	751.369	1500.72	2	1.77925	86.718
	G3Q398;A0A0D9SGF6;A0A0P7VEP4;A0A0R4IJ08;A0A0S7GFQ8;A0A0S7GFR3;A0A0S7GFS1;A0A0S7GFS2;A0A0S7GFS3;A0A0S7GFT9;A0A0S7GG64;A0A0S7GGW2;A0A0S7GGW7;A0A0S7GKU3;A0A0S7GLM7;A0A0S7GNH5;A0A1A7WGD9;A0A1A7Z4A6;A0A1A8AIC9;A0A1A8DRB6;A0A1A8GCR2;A0A1A8KF62;A0A1A8MAY9;A0A1A8MXE6;A0A1A8QNY9;A0A1A8RNY5;A0A1A8SFC1;A0A1A8UI02;A0A060XII9;A0A060XJX9;A0A087XQU7;A0A146NIL5;A0A146NIU7;A0A146NJR6;A0A146Q523;A0A146Z4H1;A0A146Z…	639.152	1.0256	DCEQAENWMAAR	[2] Methylthio (C)	84.18	735.286	1468.56	2	4.578	79.8609
	G3Q398;A0A0D9SGF6;A0A0P7V2T7;A0A0R4IJ08;A0A0S7GFR3;A0A0S7GFS1;A0A0S7GFS2;A0A0S7GFS3;A0A0S7GG64;A0A0S7GGW2;A0A0S7GGW7;A0A0S7GKU3;A0A0S7GLM7;A0A0S7GNH5;A0A1A7WGD9;A0A1A7Z4A6;A0A1A8AIC9;A0A1A8DRB6;A0A1A8GCR2;A0A1A8MAY9;A0A1A8MXE6;A0A1A8QNY9;A0A1A8RNY5;A0A1A8SFC1;A0A1A8UI02;A0A060XII9;A0A060XJX9;A0A087XQU7;A0A146NIL5;A0A146NIU7;A0A146NJR6;A0A146Q523;A0A146Z4H1;A0A146Z4J7;A0A146Z4K2;A0A146Z4L3;A0A146Z…	342.749	49.8991	DADETKEWIEEK		83.48	746.846	1491.68	2	5.32486	44.8114
	G3Q398;A0A0D9SGF6;A0A0P7V2T7;A0A0P7VEP4;A0A0R4IJ08;A0A0S7GFQ8;A0A0S7GFR3;A0A0S7GFS1;A0A0S7GFS2;A0A0S7GFS3;A0A0S7GFT9;A0A0S7GG64;A0A0S7GGW2;A0A0S7GGW7;A0A0S7GKU3;A0A0S7GLM7;A0A0S7GNH5;A0A1A7WGD9;A0A1A7Z4A6;A0A1A8AIC9;A0A1A8DRB6;A0A1A8GCR2;A0A1A8KF62;A0A1A8MAY9;A0A1A8MXE6;A0A1A8QNY9;A0A1A8RNY5;A0A1A8SFC1;A0A1A8UI02;A0A060XII9;A0A060XJX9;A0A087XQU7;A0A146NIL5;A0A146NIU7;A0A146NJR6;A0A146Q523;A0A146Z…	1.58256	1.52869	DVTGAEALLER		82.72	587.31	1172.6	2	3.83635	77.9559
	G3Q398;A0A0D9SGF6;A0A0P7V2T7;A0A0P7VEP4;A0A0R4IJ08;A0A1A7WGD9;A0A1A7Z4A6;A0A1A8D2Q6;A0A1A8D8C3;A0A1A8GCR2;A0A1A8I584;A0A1A8KR84;A0A1A8MAY9;A0A1A8QC83;A0A1A8SFC1;A0A1A8UI02;A0A060XII9;A0A060XJX9;A0A087XQU7;A0A146Q523;A0A146Z4H1;A0A146Z4J7;A0A146Z4K2;A0A146Z4L3;A0A146Z4P1;A0A146Z5L2;A0A146Z6F5;A0A146Z650;F1R443;F1R446;G3Q393;H2MBY2;H2UIA9;H2UIB0;H2UIB1;H3C0G3;H3CBT9;I3JZ89;I3JZ90;M4A8R0;Q4T9R4;Q4T9…	1.36222	1.05396	HQAFEAELSANQSR		82.34	794.38	1586.75	2	3.32603	40.4952
	G3Q398;A0A0D9SGF6;A0A0P7V2T7;A0A0P7VEP4;A0A0R4IJ08;A0A0S7GKE8;A0A0S7GMT1;A0A0S7GQA6;A0A1A7WGD9;A0A1A7Z4A6;A0A1A8D2Q6;A0A1A8D8C3;A0A1A8GCR2;A0A1A8I584;A0A1A8KR84;A0A1A8MAY9;A0A1A8QC83;A0A1A8SFC1;A0A1A8UI02;A0A060XII9;A0A060XJX9;A0A087XQU7;A0A146Q523;A0A146Z4H1;A0A146Z4K2;A0A146Z4L3;A0A146Z4P1;A0A146Z5L2;A0A146Z6F5;F1R443;F1R446;G3Q393;H2MBY2;H2UIA9;H2UIB0;H2UIB1;H3C0G3;H3CBT9;I3JZ89;I3JZ90;M4A8R0;…	13.9598	12.7181	DLASVQALLR		82.27	543.319	1084.62	2	4.01573	111.985
	G3Q398;A0A0R4IJ08;A0A0S7GFS1;A0A0S7GFS2;A0A0S7GFS3;A0A0S7GG64;A0A0S7GGW2;A0A0S7GGW7;A0A0S7GI92;A0A0S7GKU3;A0A0S7GLM7;A0A0S7GLW5;A0A1A7WGD9;A0A1A7Z4A6;A0A1A8AIC9;A0A1A8DRB6;A0A1A8GCR2;A0A1A8KF62;A0A1A8MAY9;A0A1A8MXE6;A0A1A8QNY9;A0A1A8RNY5;A0A1A8SFC1;A0A1A8UI02;A0A060XII9;A0A060XJX9;A0A087XQU7;A0A146NIL5;A0A146NIU7;A0A146NJR6;A0A146Q523;A0A146Z4J7;A0A146Z4L3;A0A146Z4P1;A0A146Z6F5;A0A146Z650;C0PUV6;…	0.00243808	1.43642	QETFDAGLQAFQQEGITNITALKDQLLAAK		81.55	1088.24	3261.69	3	0.395662	190.428
	G3Q398;A0A0R4IJ08;A0A0S7GKE8;A0A0S7GKV9;A0A0S7GQU7;A0A1A8D2Q6;A0A1A8D8C3;A0A1A8GCR2;A0A1A8I584;A0A1A8KR84;A0A1A8MAY9;A0A1A8QC83;A0A1A8SFC1;A0A1A8UI02;A0A060XII9;A0A060XJX9;A0A087XQU7;A0A146Z4H1;A0A146Z4K2;A0A146Z4L3;A0A146Z4P1;A0A146Z5L2;A0A146Z6F5;F1R443;F1R446;G3Q393;H2MBY2;I3JZ89;I3JZ90;M4A8R0;Q32P38;Q566W8;W5KTF3;W5KTG2;W5MFM2;W5MFP4	3.59038	0.31157	DADELEKWIQEK		80.79	752.37	1502.73	2	-2.72521	95.8845
	G3Q398;A0A0D9SGF6;A0A0P7V2T7;A0A0P7VEP4;A0A0R4IJ08;A0A0S7GFS1;A0A0S7GFS2;A0A0S7GFS3;A0A0S7GG64;A0A0S7GGW2;A0A0S7GGW7;A0A0S7GI92;A0A0S7GKU3;A0A0S7GLM7;A0A0S7GLW5;A0A1A7WGD9;A0A1A7Z4A6;A0A1A8AIC9;A0A1A8DRB6;A0A1A8GCR2;A0A1A8KF62;A0A1A8MAY9;A0A1A8MXE6;A0A1A8QNY9;A0A1A8RNY5;A0A1A8SFC1;A0A1A8UI02;A0A060XII9;A0A060XJX9;A0A087XQU7;A0A146NIL5;A0A146NIU7;A0A146NJR6;A0A146Q523;A0A146Z4J7;A0A146Z4K2;A0A146Z…	3.42187	0.776863	ADVVESWIGEK		80.45	616.814	1231.61	2	3.30561	81.7777
	G3Q398;A0A0S7GFS2;A0A0S7GFS3;A0A0S7GGW7;A0A0S7GI92;A0A0S7GKU3;A0A1A7WGD9;A0A1A7Z4A6;A0A1A8AIC9;A0A1A8DRB6;A0A1A8GCR2;A0A1A8KF62;A0A1A8MAY9;A0A1A8MXE6;A0A1A8QNY9;A0A1A8RNY5;A0A1A8SFC1;A0A1A8UI02;A0A060XII9;A0A060XJX9;A0A146NIU7;A0A146Q523;A0A146Z4J7;A0A146Z4L3;A0A146Z4P1;A0A146Z6F5;A0A146Z650;C0PUV6;F1R446;G3Q393;H2MBY2;H3C0G3;H3CBT9;I3JZ89;Q13813;W5KTG2;W5MFM2	3.63141	5.60988	TYLLDGSCMVEESGTLESQLEATKR	[8] Methylthio (C)	79.79	936.109	2805.3	3	4.90607	152.98
	G3Q398;A0A0D9SGF6;A0A0P7V2T7;A0A0P7VEP4;A0A0R4IJ08;A0A0S7GKE8;A0A0S7GMT1;A0A0S7GQA6;A0A1A7WGD9;A0A1A7Z4A6;A0A1A8D2Q6;A0A1A8D8C3;A0A1A8GCR2;A0A1A8I584;A0A1A8KR84;A0A1A8MAY9;A0A1A8QC83;A0A1A8SFC1;A0A1A8UI02;A0A060XII9;A0A060XJX9;A0A087XQU7;A0A146Q523;A0A146Z4H1;A0A146Z4K2;A0A146Z4L3;A0A146Z4P1;A0A146Z5L2;A0A146Z6F5;A0A146Z650;F1R443;F1R446;G3Q393;H2MBY2;H2UIA9;H2UIB0;H2UIB1;H3C0G3;H3CBT9;I3JZ89;I3J…	4.51153	0.892071	DTEQVDNWMSK		79.45	676.796	1351.58	2	5.05027	55.3468
	G3Q398;A0A0R4IJ08;A0A0S7GFS1;A0A0S7GFS2;A0A0S7GFS3;A0A0S7GG64;A0A0S7GGW2;A0A0S7GGW7;A0A0S7GI92;A0A0S7GKU3;A0A0S7GLM7;A0A0S7GLW5;A0A1A7WGD9;A0A1A7Z4A6;A0A1A8AIC9;A0A1A8DRB6;A0A1A8GCR2;A0A1A8KF62;A0A1A8MAY9;A0A1A8MXE6;A0A1A8QNY9;A0A1A8RNY5;A0A1A8SFC1;A0A1A8UI02;A0A060XII9;A0A060XJX9;A0A087XQU7;A0A146NIL5;A0A146NIU7;A0A146NJR6;A0A146Q523;A0A146Z4J7;A0A146Z4L3;A0A146Z4P1;A0A146Z6F5;A0A146Z650;C0PUV6;…	1158.65	1.01947	QETFDAGLQAFQQEGITNITALKDQLLAAK		78.96	816.434	3261.71	4	4.85996	190.921
	G3Q398;A0A0R4IJ08;A0A0S7GFS1;A0A0S7GFS2;A0A0S7GFS3;A0A0S7GG64;A0A0S7GGW2;A0A0S7GGW7;A0A0S7GI92;A0A0S7GKU3;A0A0S7GLM7;A0A0S7GLW5;A0A1A7WGD9;A0A1A7Z4A6;A0A1A8AIC9;A0A1A8DRB6;A0A1A8GCR2;A0A1A8KF62;A0A1A8MAY9;A0A1A8MXE6;A0A1A8QNY9;A0A1A8RNY5;A0A1A8SFC1;A0A1A8UI02;A0A060XII9;A0A060XJX9;A0A087XQU7;A0A146NIL5;A0A146NIU7;A0A146NJR6;A0A146Q523;A0A146Z4J7;A0A146Z4L3;A0A146Z4P1;A0A146Z6F5;A0A146Z650;C0PUV6;…	176.05	1.01947	QETFDAGLQAFQQEGITNITALKDQLLAAK	[N-term] Gln->pyro-Glu (N-term Q)	77.51	1082.57	3244.68	3	4.79505	192.126
	G3Q398;A0A0P7VEP4;A0A0R4IJ08;A0A0S7GKQ9;A0A0S7GMT1;A0A0S7GRJ6;A0A1A7WGD9;A0A1A7Z4A6;A0A1A8D2Q6;A0A1A8D8C3;A0A1A8GCR2;A0A1A8I584;A0A1A8KR84;A0A1A8MAY9;A0A1A8QC83;A0A1A8SFC1;A0A1A8UI02;A0A060XII9;A0A087XQU7;A0A146Q523;A0A146Z4H1;A0A146Z4K2;A0A146Z4L3;A0A146Z4P1;A0A146Z5L2;A0A146Z6F5;A0A146Z650;F1R443;F1R446;G3Q393;H2UIA9;H2UIB0;H2UIB1;H3C0G3;H3CBT9;I3JZ89;I3JZ90;M4A8R0;Q4T9R4;Q4T9R5;W5KTF3;W5KTG2;W…	1.19251	1.01947	RAALEDSFHLQQFFR		77.08	622.323	1863.95	3	3.76403	124.952
	G3Q398;A0A0R4IJ08;A0A0S7GFR3;A0A0S7GFS3;A0A0S7GG64;A0A0S7GGW2;A0A0S7GKU3;A0A0S7GNH5;A0A1A7WGD9;A0A1A7Z4A6;A0A1A8AIC9;A0A1A8DRB6;A0A1A8GCR2;A0A1A8KF62;A0A1A8MAY9;A0A1A8MXE6;A0A1A8QNY9;A0A1A8RNY5;A0A1A8SFC1;A0A1A8UI02;A0A060XII9;A0A060XJX9;A0A087XQU7;A0A146NIL5;A0A146NIU7;A0A146NJR6;A0A146Z4H1;A0A146Z4P1;F1R446;H2MBY2;H2UIB0;I3JZ89;M4A8R0;W5KTF3;W5KTG2;W5MFM2;W5MFP4	1.81363	0.890157	LQTATDESYKDPTNIQLSK		77.03	718.032	2151.07	3	1.28737	63.1219
	G3Q398;A0A0D9SGF6;A0A0P7V2T7;A0A0P7VEP4;A0A0R4IJ08;A0A0S7GFS1;A0A0S7GFS2;A0A0S7GFS3;A0A0S7GG64;A0A0S7GGW2;A0A0S7GGW7;A0A0S7GI92;A0A0S7GKU3;A0A0S7GLM7;A0A0S7GLW5;A0A1A7WGD9;A0A1A7Z4A6;A0A1A8AIC9;A0A1A8DRB6;A0A1A8GCR2;A0A1A8KF62;A0A1A8MAY9;A0A1A8MXE6;A0A1A8QNY9;A0A1A8RNY5;A0A1A8SFC1;A0A1A8UI02;A0A060XII9;A0A060XJX9;A0A087XQU7;A0A146NIL5;A0A146NIU7;A0A146NJR6;A0A146Q523;A0A146Z4J7;A0A146Z4K2;A0A146Z…	1.51824	0.852764	DLSSVQTLLTK		76.54	602.844	1203.67	2	2.8522	99.131
	G3Q398;A0A0P7VEP4;A0A0R4IJ08;A0A0S7GKQ9;A0A0S7GMT1;A0A0S7GRJ6;A0A1A7WGD9;A0A1A7Z4A6;A0A1A8D2Q6;A0A1A8D8C3;A0A1A8GCR2;A0A1A8I584;A0A1A8KR84;A0A1A8MAY9;A0A1A8QC83;A0A1A8SFC1;A0A1A8UI02;A0A060XII9;A0A060XJX9;A0A087XQU7;A0A146Q523;A0A146Z4H1;A0A146Z4K2;A0A146Z4L3;A0A146Z4P1;A0A146Z5L2;A0A146Z6F5;A0A146Z650;F1R443;F1R446;G3Q393;H2MBY2;H2UIA9;H2UIB0;H2UIB1;H3C0G3;H3CBT9;I3JZ89;I3JZ90;M4A8R0;Q4T9R4;Q4T9…	1.13379	1.01947	DSDELKSWINEK		75.04	732.356	1462.7	2	5.36109	70.5467
	G3Q398;A0A0D9SGF6;A0A0P7V2T7;A0A0P7VEP4;A0A0R4IJ08;A0A0S7GFS1;A0A0S7GFS2;A0A0S7GFS3;A0A0S7GG64;A0A0S7GGW2;A0A0S7GGW7;A0A0S7GI92;A0A0S7GKU3;A0A0S7GLM7;A0A0S7GLW5;A0A1A7WGD9;A0A1A7Z4A6;A0A1A8AIC9;A0A1A8DRB6;A0A1A8GCR2;A0A1A8KF62;A0A1A8MAY9;A0A1A8MXE6;A0A1A8QNY9;A0A1A8RNY5;A0A1A8SFC1;A0A1A8UI02;A0A060XII9;A0A060XJX9;A0A087XQU7;A0A146NIL5;A0A146NIU7;A0A146NJR6;A0A146Q523;A0A146Z4J7;A0A146Z4K2;A0A146Z…	1.03818	0.845309	ASAFNSWFENAEEDLTDPVR		74.24	1149.52	2297.03	2	4.16893	161.833
	G3Q398;A0A0D9SGF6;A0A0P7VEP4;A0A0R4IJ08;A0A0S7GFR3;A0A0S7GFS2;A0A0S7GG64;A0A0S7GKU3;A0A0S7GLM7;A0A1A7WGD9;A0A1A7Z4A6;A0A1A8D2Q6;A0A1A8GCR2;A0A1A8I584;A0A1A8KR84;A0A1A8MXE6;A0A1A8QNY9;A0A1A8SFC1;A0A060XII9;A0A146NIL5;A0A146NIU7;A0A146NJR6;A0A146Q523;A0A146Z4H1;A0A146Z4J7;A0A146Z4K2;A0A146Z4L3;A0A146Z4P1;A0A146Z5L2;A0A146Z6F5;A0A146Z650;F1R443;F1R446;G3Q393;H2MBY2;H2UIA9;H2UIB0;H2UIB1;H3C0G3;H3CBT9…	9.89134	42.8179	KGDILTLLNSTNKDWWK		73.99	678.035	2031.08	3	1.34542	153.628
	G3Q398;A0A0D9SGF6;A0A0P7VEP4;A0A0R4IJ08;A0A0S7GKE8;A0A0S7GMT1;A0A0S7GQA6;A0A1A7WGD9;A0A1A7Z4A6;A0A1A8D2Q6;A0A1A8D8C3;A0A1A8GCR2;A0A1A8I584;A0A1A8KR84;A0A1A8MAY9;A0A1A8QC83;A0A1A8SFC1;A0A1A8UI02;A0A060XII9;A0A060XJX9;A0A087XQU7;A0A146Q523;A0A146Z4H1;A0A146Z4K2;A0A146Z4L3;A0A146Z4P1;A0A146Z5L2;A0A146Z6F5;A0A146Z650;F1R443;F1R446;G3Q393;I3JZ89;I3JZ90;M4A8R0;Q566W8;Q13813;W5KTF3;W5KTG2;W5MFM2;W5MFP4	2.07143	0.191413	DLTSWVTEMK		73.73	605.296	1208.58	2	6.47796	114.66
	G3Q398;A0A0D9SGF6;A0A0P7V2T7;A0A0R4IJ08;A0A060XJX9;A0A146Q523;A0A146Z4H1;A0A146Z4J7;A0A146Z4K2;A0A146Z4L3;A0A146Z4P1;A0A146Z5L2;A0A146Z6F5;A0A146Z650;F1QDX2;F1R443;F1R446;G3Q393;H2MBY2;H3C0G3;H3CBT9;I3JZ89;I3JZ90;Q4T9R4;Q4T9R5;Q13813;W5KTF3;W5KTG2;W5MFM2;W5MFP4	1.34405	1.11579	DLAALGDKVNSLGETAER		73.23	620.321	1857.94	3	0.633634	86.0829
	G3Q398;A0A0P7VEP4;A0A1A7Z4A6;A0A1A8D2Q6;A0A1A8D8C3;A0A1A8GCR2;A0A1A8I584;A0A1A8KR84;A0A1A8MAY9;A0A1A8QC83;A0A1A8SFC1;A0A1A8UI02;A0A060XII9;A0A060XJX9;G3Q393;W5MFM2;W5MFP4	375.95	325.392	HQAFEAEVQANAGAIIK		72.73	599.649	1795.92	3	2.76581	83.9641
	G3Q398;A0A060XII9;A0A060XJX9;G3Q393;I3JZ89;I3JZ90;W5KTF3;W5KTG2	0.123332	250.724	SGQELLDGK		71.5	473.745	945.476	2	-3.85457	25.547
	G3Q398;A0A0R4IJ08;A0A0S7GFQ8;A0A0S7GFR3;A0A0S7GFS1;A0A0S7GFS2;A0A0S7GFS3;A0A0S7GFT9;A0A0S7GG64;A0A0S7GGW2;A0A0S7GGW7;A0A0S7GKU3;A0A0S7GLM7;A0A0S7GNH5;A0A1A7WGD9;A0A1A7Z4A6;A0A1A8AIC9;A0A1A8DRB6;A0A1A8GCR2;A0A1A8KF62;A0A1A8MAY9;A0A1A8MXE6;A0A1A8QNY9;A0A1A8RNY5;A0A1A8SFC1;A0A1A8UI02;A0A060XII9;A0A060XJX9;A0A087XQU7;A0A146NIL5;A0A146NIU7;A0A146NJR6;A0A146Q523;A0A146Z4H1;A0A146Z4J7;A0A146Z4K2;A0A146Z…	1.2166	0.487952	EAFLASDDKGDSLDSVEALIK		71.06	741.709	2222.11	3	2.41343	138.153
	G3Q398;A0A0D9SGF6;A0A0P7V2T7;A0A0P7VEP4;A0A0R4IJ08;A0A0S7GFS2;A0A0S7GFS3;A0A0S7GGW7;A0A0S7GI92;A0A0S7GKU3;A0A1A7WGD9;A0A1A7Z4A6;A0A1A8AIC9;A0A1A8DRB6;A0A1A8GCR2;A0A1A8KF62;A0A1A8MAY9;A0A1A8MXE6;A0A1A8QNY9;A0A1A8RNY5;A0A1A8SFC1;A0A1A8UI02;A0A060XII9;A0A060XJX9;A0A087XQU7;A0A146NIU7;A0A146Q523;A0A146Z4J7;A0A146Z4L3;A0A146Z4P1;A0A146Z6F5;A0A146Z650;C0PUV6;F1R443;F1R445;F1R446;F8K8N3;G3Q393;H2MBY2;H2…	748.413	24.6248	KIEDLGAAMEEALILDNK		70.83	987.022	1972.03	2	5.20131	152.693
	G3Q398;A0A0D9SGF6;A0A0P7V2T7;A0A0P7VEP4;A0A0R4IJ08;A0A0S7GFR3;A0A0S7GFS2;A0A0S7GG64;A0A0S7GKU3;A0A0S7GLM7;A0A1A7WGD9;A0A1A7Z4A6;A0A1A8D2Q6;A0A1A8GCR2;A0A1A8I584;A0A1A8KR84;A0A1A8MAY9;A0A1A8SFC1;A0A060XII9;A0A060XJX9;A0A087XQU7;A0A146NIL5;A0A146NIU7;A0A146NJR6;A0A146Q523;A0A146Z4H1;A0A146Z4J7;A0A146Z4L3;A0A146Z4P1;A0A146Z5L2;A0A146Z6F5;A0A146Z650;F1R443;F1R446;G3Q393;H2MBY2;H2UIA9;H2UIB0;H2UIB1;H3…	0.646554	0.72502	GKDLIGVQNLLK		69.7	649.397	1296.78	2	-1.08841	96.0961
	G3Q398;A0A060XII9;A0A060XJX9;C0PUV6;G3Q393;H2UGD2	0.991535	1.2877	EELYQNLSK		69.51	562.289	1122.56	2	2.28799	40.4952
	G3Q398;A0A0P7VEP4;A0A0R4IJ08;A0A060XII9;A0A060XJX9;F1R443;F1R446;G3Q393;H2UIA9;H2UIB0;H2UIB1;H3C0G3;H3CBT9;I3JZ89;I3JZ90;Q4T9R4;W5KTF3;W5KTG2;W5MFM2;W5MFP4	0.109469	1.64738	LLVSSEDYGR		68.99	569.792	1137.57	2	-0.811243	46.0808
	G3Q398;A0A0D9SGF6;A0A0P7V2T7;A0A0P7VEP4;A0A0R4IJ08;A0A060XII9;A0A060XJX9;F1R443;F1R446;G3Q393;H2UIA9;H2UIB0;H2UIB1;H3C0G3;H3CBT9;I3JZ89;I3JZ90;Q4T9R4;Q4T9R5;Q13813;W5KTF3;W5KTG2;W5MFM2;W5MFP4	0.996473	0.855391	TATDEAYKDPSNLQGK		67.48	579.948	1736.82	3	2.06475	28.4351
	G3Q398;A0A0D9SGF6;A0A0P7VEP4;A0A0R4IJ08;A0A0S7GFR3;A0A0S7GFS1;A0A0S7GFS2;A0A0S7GFS3;A0A0S7GG64;A0A0S7GGW2;A0A0S7GGW7;A0A0S7GKU3;A0A0S7GLM7;A0A0S7GNH5;A0A1A7WGD9;A0A1A7Z4A6;A0A1A8AIC9;A0A1A8DRB6;A0A1A8GCR2;A0A1A8KF62;A0A1A8MAY9;A0A1A8MXE6;A0A1A8QNY9;A0A1A8RNY5;A0A1A8SFC1;A0A1A8UI02;A0A060XII9;A0A060XJX9;A0A087XQU7;A0A146NIL5;A0A146NIU7;A0A146NJR6;A0A146Q523;A0A146Z4H1;A0A146Z4J7;A0A146Z4K2;A0A146Z…	1.68847	1.87492	DLMSWINGIR		67.46	602.812	1203.61	2	-0.298836	155.21
	G3Q398;A0A0D9SGF6;A0A0P7V2T7;A0A0P7VEP4;A0A0R4IJ08;A0A0S7GFS1;A0A0S7GFS2;A0A0S7GFS3;A0A0S7GG64;A0A0S7GGW2;A0A0S7GGW7;A0A0S7GI92;A0A0S7GKU3;A0A0S7GLM7;A0A0S7GLW5;A0A1A7WGD9;A0A1A7Z4A6;A0A1A8AIC9;A0A1A8DRB6;A0A1A8GCR2;A0A1A8KF62;A0A1A8MAY9;A0A1A8MXE6;A0A1A8QNY9;A0A1A8RNY5;A0A1A8SFC1;A0A1A8UI02;A0A060XII9;A0A060XJX9;A0A087XQU7;A0A146NIL5;A0A146NIU7;A0A146NJR6;A0A146Q523;A0A146Z4J7;A0A146Z4K2;A0A146Z…	44.1651	0.424204	ASAFNSWFENAEEDLTDPVR		66.91	766.686	2297.04	3	6.9364	164.274
	G3Q398;A0A1A7WGD9;A0A1A7Z4A6;A0A1A8AIC9;A0A1A8DRB6;A0A1A8GCR2;A0A1A8KF62;A0A1A8MAY9;A0A1A8MXE6;A0A1A8QNY9;A0A1A8RNY5;A0A1A8SFC1;A0A1A8UI02;A0A060XII9;A0A060XJX9;G3Q393;H2MBY2;H2UIA9;H2UIB0;H2UIB1;H3C0G3;H3CBT9;I3JZ89;I3JZ90;Q4T9R4;W5KTF3;W5KTG2	1.11623	0.116383	GHYASPEIQQK		66.23	419.88	1256.62	3	6.94991	21.7151
	G3Q398;A0A0D9SGF6;A0A0P7V2T7;A0A0P7VEP4;A0A0R4IJ08;A0A0S7GFR3;A0A0S7GFS2;A0A0S7GG64;A0A0S7GKU3;A0A0S7GLM7;A0A1A7WGD9;A0A1A7Z4A6;A0A1A8D2Q6;A0A1A8D8C3;A0A1A8GCR2;A0A1A8I584;A0A1A8KR84;A0A1A8MAY9;A0A1A8QC83;A0A1A8SFC1;A0A060XJX9;A0A087XQU7;A0A146NIL5;A0A146NIU7;A0A146NJR6;A0A146Q523;A0A146Z4H1;A0A146Z4J7;A0A146Z4K2;A0A146Z4L3;A0A146Z4P1;A0A146Z5L2;A0A146Z6F5;A0A146Z650;F1R443;F1R446;G3Q393;H2MBY2;H…	1.77112	0.00401734	DVEDEETWIR		65.86	646.296	1290.58	2	5.49503	68.6247
	G3Q398;A0A0P7VEP4;A0A0R4IJ08;A0A0S7GFS1;A0A0S7GFS2;A0A0S7GFS3;A0A0S7GG64;A0A0S7GGW2;A0A0S7GGW7;A0A0S7GI92;A0A0S7GKU3;A0A0S7GLM7;A0A0S7GLW5;A0A1A7WGD9;A0A1A7Z4A6;A0A1A8AIC9;A0A1A8DRB6;A0A1A8GCR2;A0A1A8KF62;A0A1A8MAY9;A0A1A8MXE6;A0A1A8QNY9;A0A1A8RNY5;A0A1A8SFC1;A0A1A8UI02;A0A060XII9;A0A060XJX9;A0A087XQU7;A0A146NIL5;A0A146NIU7;A0A146NJR6;A0A146Q523;A0A146Z4J7;A0A146Z4K2;A0A146Z4L3;A0A146Z4P1;A0A146Z…	357.792	2.6172	CNSLEEIR	[1] Methylthio (C)	65.69	505.229	1008.44	2	4.26409	42.7674
	G3Q398;A0A0D9SGF6;A0A0P7V2T7;A0A0R4IJ08;A0A060XJX9;A0A146Q523;A0A146Z4H1;A0A146Z4J7;A0A146Z4K2;A0A146Z4L3;A0A146Z4P1;A0A146Z5L2;A0A146Z6F5;A0A146Z650;F1QDX2;F1R443;F1R446;G3Q393;H2MBY2;H3C0G3;H3CBT9;I3JZ89;I3JZ90;Q4T9R4;Q4T9R5;Q13813;W5KTF3;W5KTG2;W5MFM2;W5MFP4	1.01779	0.0478746	VNSLGETAER		65.66	538.272	1074.53	2	-0.776137	20.515
	G3Q398;A0A0D9SGF6;A0A0P7V2T7;A0A0P7VEP4;A0A0R4IJ08;A0A0S7GKQ9;A0A0S7GMT1;A0A0S7GRJ6;A0A1A7WGD9;A0A1A7Z4A6;A0A1A8D2Q6;A0A1A8D8C3;A0A1A8GCR2;A0A1A8I584;A0A1A8KR84;A0A1A8MAY9;A0A1A8QC83;A0A1A8SFC1;A0A1A8UI02;A0A060XII9;A0A060XJX9;A0A087XQU7;A0A146Q523;A0A146Z4H1;A0A146Z4K2;A0A146Z4L3;A0A146Z4P1;A0A146Z5L2;A0A146Z6F5;A0A146Z650;F1R443;F1R446;G3Q393;H2MBY2;H2UIA9;H2UIB0;H2UIB1;H3C0G3;H3CBT9;I3JZ89;I3J…	0.821047	1.11662	ITALDEFATK		65	554.791	1107.57	2	-11.0637	72.3097
	G3Q398;A0A0P7VEP4;A0A0R4IJ08;A0A0S7GFQ2;A0A0S7GFQ8;A0A0S7GFR3;A0A0S7GFS1;A0A0S7GFS2;A0A0S7GFS3;A0A0S7GG64;A0A0S7GGW2;A0A0S7GGW7;A0A0S7GI92;A0A0S7GKU3;A0A0S7GLM7;A0A0S7GLW5;A0A0S7GNH5;A0A1A7WGD9;A0A1A7Z4A6;A0A1A8AIC9;A0A1A8DRB6;A0A1A8GCR2;A0A1A8KF62;A0A1A8MAY9;A0A1A8MXE6;A0A1A8QNY9;A0A1A8RNY5;A0A1A8SFC1;A0A1A8UI02;A0A060XII9;A0A060XJX9;A0A087XQU7;A0A146NIL5;A0A146NIU7;A0A146NJR6;A0A146Q523;A0A146Z…	1.55949	1.01947	DLDDEESWIKEK		64.98	502.906	1505.7	3	3.79862	67.8497
	G3Q398;A0A0D9SGF6;A0A0P7V2T7;A0A0P7VEP4;A0A0R4IJ08;A0A0S7GFS2;A0A0S7GFS3;A0A0S7GGW7;A0A0S7GI92;A0A0S7GKU3;A0A1A7WGD9;A0A1A7Z4A6;A0A1A8AIC9;A0A1A8DRB6;A0A1A8GCR2;A0A1A8KF62;A0A1A8MAY9;A0A1A8MXE6;A0A1A8QNY9;A0A1A8RNY5;A0A1A8SFC1;A0A1A8UI02;A0A060XII9;A0A060XJX9;A0A087XQU7;A0A146NIU7;A0A146Q523;A0A146Z4J7;A0A146Z4L3;A0A146Z4P1;A0A146Z6F5;A0A146Z650;C0PUV6;F1R443;F1R445;F1R446;F8K8N3;G3Q393;H2MBY2;H2…	0.00150252	0.0161301	MQHNLEQQIQAR		63.72	499.254	1494.74	3	-0.210263	31.0477
	G3Q398;A0A0P7VEP4;A0A0R4IJ08;A0A0S7GFR3;A0A0S7GFS1;A0A0S7GFS2;A0A0S7GFS3;A0A0S7GG64;A0A0S7GGW2;A0A0S7GGW7;A0A0S7GKU3;A0A0S7GLM7;A0A0S7GNH5;A0A1A7WGD9;A0A1A7Z4A6;A0A1A8AIC9;A0A1A8DRB6;A0A1A8GCR2;A0A1A8KF62;A0A1A8MAY9;A0A1A8MXE6;A0A1A8QNY9;A0A1A8RNY5;A0A1A8SFC1;A0A1A8UI02;A0A060XII9;A0A060XJX9;A0A087XQU7;A0A146NIL5;A0A146NIU7;A0A146NJR6;A0A146Q523;A0A146Z4H1;A0A146Z4J7;A0A146Z4K2;A0A146Z4L3;A0A146Z…	1.51961	32.2562	LIQSHPEAVDDIQEK		63.33	574.629	1720.86	3	2.61635	42.2722
	G3Q398;A0A0P7V2T7;A0A0P7VEP4;A0A0R4IJ08;A0A0S7GKE8;A0A0S7GMT1;A0A0S7GQA6;A0A1A7WGD9;A0A1A7Z4A6;A0A1A8D2Q6;A0A1A8D8C3;A0A1A8GCR2;A0A1A8I584;A0A1A8KR84;A0A1A8MAY9;A0A1A8QC83;A0A1A8SFC1;A0A1A8UI02;A0A060XII9;A0A060XJX9;A0A087XQU7;A0A146Q523;A0A146Z4H1;A0A146Z4K2;A0A146Z4L3;A0A146Z4P1;A0A146Z5L2;A0A146Z6F5;A0A146Z650;F1R443;F1R446;G3Q393;H2MBY2;I3JZ89;I3JZ90;M4A8R0;Q566W8;W5KTF3;W5KTG2;W5MFM2;W5MFP4	4.7557	1.01947	ALINADELANDVAGAEALLDR		63.3	1077.56	2153.1	2	2.01469	185.541
	G3Q398;A0A0D9SGF6;A0A0P7VEP4;A0A0R4IJ08;A0A0S7GFR3;A0A0S7GFS2;A0A0S7GG64;A0A0S7GKU3;A0A0S7GLM7;A0A1A7WGD9;A0A1A7Z4A6;A0A1A8D2Q6;A0A1A8D8C3;A0A1A8GCR2;A0A1A8I584;A0A1A8KR84;A0A1A8MAY9;A0A1A8QC83;A0A1A8SFC1;A0A1A8UI02;A0A060XII9;A0A060XJX9;A0A087XQU7;A0A146NJR6;A0A146Q523;A0A146Z4H1;A0A146Z4J7;A0A146Z4K2;A0A146Z4L3;A0A146Z4P1;A0A146Z5L2;A0A146Z6F5;A0A146Z650;F1R443;F1R446;G3Q393;H2MBY2;H2UIA9;H2UIB…	0.908829	0.475904	HALLEADVAAHQDR		62.69	515.936	1544.79	3	10.1322	40.423
	G3Q398;A0A0R4IJ08;A0A0S7GFQ8;A0A0S7GFR3;A0A0S7GFS1;A0A0S7GFS2;A0A0S7GFS3;A0A0S7GFT9;A0A0S7GG64;A0A0S7GGW2;A0A0S7GGW7;A0A0S7GKU3;A0A0S7GLM7;A0A0S7GNH5;A0A1A7WGD9;A0A1A7Z4A6;A0A1A8AIC9;A0A1A8DRB6;A0A1A8GCR2;A0A1A8KF62;A0A1A8MAY9;A0A1A8MXE6;A0A1A8QNY9;A0A1A8RNY5;A0A1A8SFC1;A0A1A8UI02;A0A060XII9;A0A060XJX9;A0A087XQU7;A0A146NIL5;A0A146NIU7;A0A146NJR6;A0A146Q523;A0A146Z4H1;A0A146Z4J7;A0A146Z4K2;A0A146Z…	1.64574	1.01947	EAFLASDDKGDSLDSVEALIK		62.33	1112.06	2222.1	2	1.50482	138.153
	G3Q398;A0A0D9SGF6;A0A0P7VEP4;A0A0R4IJ08;A0A0S7GFQ2;A0A0S7GFQ8;A0A0S7GFR3;A0A0S7GFS1;A0A0S7GFS2;A0A0S7GFS3;A0A0S7GG64;A0A0S7GGW2;A0A0S7GGW7;A0A0S7GI92;A0A0S7GKU3;A0A0S7GLM7;A0A0S7GLW5;A0A0S7GNH5;A0A1A7WGD9;A0A1A7Z4A6;A0A1A8AIC9;A0A1A8DRB6;A0A1A8GCR2;A0A1A8KF62;A0A1A8MAY9;A0A1A8MXE6;A0A1A8QNY9;A0A1A8RNY5;A0A1A8SFC1;A0A1A8UI02;A0A060XII9;A0A060XJX9;A0A087XQU7;A0A146NIL5;A0A146NIU7;A0A146NJR6;A0A146Q…	4.71858	1.01947	LEESLEYQQFVANVEEEEAWINEK		62.07	976.131	2925.37	3	4.07214	165.566
	G3Q398;A0A0P7VEP4;A0A0R4IJ08;A0A0S7GKQ9;A0A0S7GMT1;A0A0S7GRJ6;A0A1A7WGD9;A0A1A7Z4A6;A0A1A8D2Q6;A0A1A8D8C3;A0A1A8GCR2;A0A1A8I584;A0A1A8KR84;A0A1A8MAY9;A0A1A8QC83;A0A1A8SFC1;A0A1A8UI02;A0A060XII9;A0A087XQU7;A0A146Q523;A0A146Z4H1;A0A146Z4K2;A0A146Z4L3;A0A146Z4P1;A0A146Z5L2;A0A146Z6F5;A0A146Z650;F1R443;F1R446;G3Q393;H2UIA9;H2UIB0;H2UIB1;H3C0G3;H3CBT9;I3JZ89;I3JZ90;M4A8R0;Q4T9R4;Q4T9R5;W5KTF3;W5KTG2;W…	0.396837	0.831982	AALEDSFHLQQFFR		60.37	570.291	1707.85	3	6.80052	138.511
	G3Q398;A0A0P7VEP4;A0A0R4IJ08;A0A0S7GFQ2;A0A0S7GFQ8;A0A0S7GFR3;A0A0S7GFS1;A0A0S7GFS2;A0A0S7GFS3;A0A0S7GG64;A0A0S7GGW2;A0A0S7GGW7;A0A0S7GI92;A0A0S7GKU3;A0A0S7GLM7;A0A0S7GLW5;A0A0S7GNH5;A0A1A7WGD9;A0A1A7Z4A6;A0A1A8AIC9;A0A1A8DRB6;A0A1A8GCR2;A0A1A8KF62;A0A1A8MAY9;A0A1A8MXE6;A0A1A8QNY9;A0A1A8RNY5;A0A1A8SFC1;A0A1A8UI02;A0A060XII9;A0A060XJX9;A0A087XQU7;A0A146NIL5;A0A146NIU7;A0A146NJR6;A0A146Q523;A0A146Z…	7.88007	0.0992557	DLDDEESWIK		60.1	625.285	1248.56	2	4.38244	78.0972
	G3Q398;A0A0P7V2T7;A0A0S7GFS1;A0A0S7GFS2;A0A0S7GFS3;A0A0S7GG64;A0A0S7GGW2;A0A0S7GGW7;A0A0S7GI92;A0A0S7GKU3;A0A0S7GLM7;A0A0S7GLW5;A0A1A7WGD9;A0A1A7Z4A6;A0A1A8AIC9;A0A1A8DRB6;A0A1A8GCR2;A0A1A8KF62;A0A1A8MAY9;A0A1A8MXE6;A0A1A8QNY9;A0A1A8RNY5;A0A1A8SFC1;A0A1A8UI02;A0A060XJX9;A0A146NIL5;A0A146NIU7;A0A146NJR6;A0A146Q523;A0A146Z4J7;A0A146Z4K2;A0A146Z4L3;A0A146Z4P1;A0A146Z6F5;A0A146Z650;C0PUV6;G3Q393;H2MB…	0.915266	0.700824	LLEAQEHFR		59.87	571.799	1141.58	2	-6.0651	40.3512
	G3Q398;A0A0D9SGF6;A0A0P7V2T7;A0A0P7VEP4;A0A0R4IJ08;A0A0S7GFQ2;A0A0S7GFQ8;A0A0S7GFR3;A0A0S7GFS1;A0A0S7GFS2;A0A0S7GFS3;A0A0S7GG64;A0A0S7GGW2;A0A0S7GGW7;A0A0S7GI92;A0A0S7GKU3;A0A0S7GLM7;A0A0S7GLW5;A0A0S7GNH5;A0A1A7WGD9;A0A1A7Z4A6;A0A1A8AIC9;A0A1A8DRB6;A0A1A8GCR2;A0A1A8KF62;A0A1A8MAY9;A0A1A8MXE6;A0A1A8QNY9;A0A1A8RNY5;A0A1A8SFC1;A0A1A8UI02;A0A060XII9;A0A060XJX9;A0A087XQU7;A0A146NIL5;A0A146NIU7;A0A146N…	0.128867	41.2466	HQAFEAELHANADR		59.07	536.923	1607.75	3	3.95866	36.1187
	G3Q398;A0A0R4IJ08;A0A0S7GFR3;A0A0S7GFS1;A0A0S7GFS2;A0A0S7GFS3;A0A0S7GG64;A0A0S7GGW2;A0A0S7GGW7;A0A0S7GKU3;A0A0S7GLM7;A0A0S7GNH5;A0A1A7WGD9;A0A1A7Z4A6;A0A1A8AIC9;A0A1A8DRB6;A0A1A8GCR2;A0A1A8MAY9;A0A1A8MXE6;A0A1A8QNY9;A0A1A8RNY5;A0A1A8SFC1;A0A1A8UI02;A0A060XII9;A0A060XJX9;A0A087XQU7;A0A146NIL5;A0A146NIU7;A0A146NJR6;A0A146Q523;A0A146Z4H1;A0A146Z4J7;A0A146Z4K2;A0A146Z4L3;A0A146Z4P1;A0A146Z5L2;A0A146Z…	1.11941	0.935289	SNMLGSAHEVQR		58.43	443.55	1327.63	3	-0.271899	27.1652
	G3Q398;A0A0D9SGF6;A0A0P7VEP4;A0A0R4IJ08;A0A0S7GKE8;A0A0S7GMT1;A0A0S7GQA6;A0A1A7WGD9;A0A1A7Z4A6;A0A1A8D2Q6;A0A1A8D8C3;A0A1A8GCR2;A0A1A8I584;A0A1A8KR84;A0A1A8MAY9;A0A1A8QC83;A0A1A8SFC1;A0A1A8UI02;A0A060XII9;A0A060XJX9;A0A087XQU7;A0A146Q523;A0A146Z4H1;A0A146Z4K2;A0A146Z4L3;A0A146Z4P1;A0A146Z5L2;A0A146Z6F5;F1R443;F1R446;G3Q393;H2MBY2;H2UIA9;H2UIB0;H2UIB1;H3C0G3;H3CBT9;M4A8R0;Q4T9R4;Q566W8;Q13813;W5KT…	9.5342	1.23316	EQLMASDDFGR		57.64	634.784	1267.55	2	1.9613	56.4104
	G3Q398;A0A0D9SGF6;A0A0P7VEP4;A0A0R4IJ08;A0A0S7GKE8;A0A0S7GMT1;A0A0S7GQA6;A0A1A7WGD9;A0A1A7Z4A6;A0A1A8D2Q6;A0A1A8D8C3;A0A1A8GCR2;A0A1A8I584;A0A1A8KR84;A0A1A8MAY9;A0A1A8QC83;A0A1A8SFC1;A0A1A8UI02;A0A060XII9;A0A060XJX9;A0A087XQU7;A0A146Q523;A0A146Z4H1;A0A146Z4K2;A0A146Z4L3;A0A146Z4P1;A0A146Z5L2;A0A146Z6F5;F1R443;F1R446;G3Q393;H2MBY2;H2UIA9;H2UIB0;H2UIB1;H3C0G3;H3CBT9;M4A8R0;Q4T9R4;Q566W8;Q13813;W5KT…	0.0416343	6.13441	EKEQLMASDDFGRDLASVQALLR		57.25	648.836	2591.31	4	5.12752	164.992
	G3Q398;A0A0P7VEP4;A0A0R4IJ08;A0A0S7GKQ9;A0A0S7GMT1;A0A0S7GRJ6;A0A1A7WGD9;A0A1A7Z4A6;A0A1A8D2Q6;A0A1A8D8C3;A0A1A8GCR2;A0A1A8I584;A0A1A8KR84;A0A1A8MAY9;A0A1A8QC83;A0A1A8SFC1;A0A1A8UI02;A0A060XII9;A0A087XQU7;A0A146Q523;A0A146Z4H1;A0A146Z4K2;A0A146Z4L3;A0A146Z4P1;A0A146Z5L2;A0A146Z6F5;A0A146Z650;F1R443;F1R446;G3Q393;H2UIA9;H2UIB0;H2UIB1;H3C0G3;H3CBT9;I3JZ89;I3JZ90;M4A8R0;Q4T9R4;Q4T9R5;W5KTF3;W5KTG2;W…	1.03818	313.195	RAALEDSFHLQQFFR		57.22	466.997	1863.96	4	9.12968	123.824
	G3Q398;A0A0D9SGF6;A0A0P7V2T7;A0A0P7VEP4;A0A0R4IJ08;A0A0S7GFQ8;A0A0S7GFR3;A0A0S7GFS1;A0A0S7GFS2;A0A0S7GFS3;A0A0S7GFT9;A0A0S7GG64;A0A0S7GGW2;A0A0S7GGW7;A0A0S7GKU3;A0A0S7GLM7;A0A0S7GNH5;A0A1A7WGD9;A0A1A7Z4A6;A0A1A8AIC9;A0A1A8DRB6;A0A1A8GCR2;A0A1A8KF62;A0A1A8MAY9;A0A1A8MXE6;A0A1A8QNY9;A0A1A8RNY5;A0A1A8SFC1;A0A1A8UI02;A0A060XII9;A0A060XJX9;A0A087XQU7;A0A146NIL5;A0A146NIU7;A0A146NJR6;A0A146Q523;A0A146Z…	176.124	1.01947	SKLGESQTLQQFSR		57.05	804.917	1607.82	2	-6.37406	53.0722
	G3Q398;A0A0D9SGF6;A0A0P7V2T7;A0A0R4IJ08;A0A0S7GFR3;A0A0S7GFS1;A0A0S7GFS2;A0A0S7GFS3;A0A0S7GG64;A0A0S7GGW2;A0A0S7GGW7;A0A0S7GKU3;A0A0S7GLM7;A0A0S7GNH5;A0A1A7WGD9;A0A1A7Z4A6;A0A1A8AIC9;A0A1A8DRB6;A0A1A8GCR2;A0A1A8MAY9;A0A1A8MXE6;A0A1A8QNY9;A0A1A8RNY5;A0A1A8SFC1;A0A1A8UI02;A0A060XII9;A0A060XJX9;A0A087XQU7;A0A146NIL5;A0A146NIU7;A0A146NJR6;A0A146Q523;A0A146Z4H1;A0A146Z4J7;A0A146Z4K2;A0A146Z4L3;A0A146Z…	377.696	18.7436	DADETKEWIEEK		55.6	498.234	1491.68	3	7.33982	44.8114
	G3Q398;A0A0P7V2T7;A0A0S7GFR3;A0A0S7GFS1;A0A0S7GFS2;A0A0S7GFS3;A0A0S7GG64;A0A0S7GGW2;A0A0S7GGW7;A0A0S7GKU3;A0A0S7GLM7;A0A0S7GNH5;A0A1A7WGD9;A0A1A7Z4A6;A0A1A8AIC9;A0A1A8DRB6;A0A1A8GCR2;A0A1A8KF62;A0A1A8MAY9;A0A1A8MXE6;A0A1A8QNY9;A0A1A8RNY5;A0A1A8SFC1;A0A1A8UI02;A0A060XJX9;A0A087XQU7;A0A146NIL5;A0A146NIU7;A0A146NJR6;A0A146Q523;A0A146Z4H1;A0A146Z4J7;A0A146Z4K2;A0A146Z4L3;A0A146Z4P1;A0A146Z5L2;A0A146Z…	0.476975	75.7443	GLVSSEELAKDVTGAEALLER		54.75	547.545	2186.15	4	5.63577	155.21
	G3Q398;A0A0D9SGF6;A0A0P7VEP4;A0A0R4IJ08;A0A0S7GKE8;A0A0S7GMT1;A0A0S7GQA6;A0A1A7WGD9;A0A1A7Z4A6;A0A1A8D2Q6;A0A1A8D8C3;A0A1A8GCR2;A0A1A8I584;A0A1A8KR84;A0A1A8MAY9;A0A1A8QC83;A0A1A8SFC1;A0A1A8UI02;A0A060XII9;A0A060XJX9;A0A087XQU7;A0A146Q523;A0A146Z4H1;A0A146Z4K2;A0A146Z4L3;A0A146Z4P1;A0A146Z5L2;A0A146Z6F5;F1R443;F1R446;G3Q393;H2MBY2;H2UIA9;H2UIB0;H2UIB1;H3C0G3;H3CBT9;M4A8R0;Q4T9R4;Q566W8;Q13813;W5KT…	0.13822	0.0380785	EQLMASDDFGRDLASVQALLR		53.67	779.066	2334.18	3	7.43772	168.006
	G3Q398;G3Q393	11.5128	0.884338	GEAMVEEGHFAAEDVK		53.01	573.597	1717.77	3	5.08649	52.86
	G3Q398;A0A0P7VEP4;A0A0R4IJ08;A0A0S7GFR3;A0A0S7GFS1;A0A0S7GFS2;A0A0S7GFS3;A0A0S7GG64;A0A0S7GGW2;A0A0S7GGW7;A0A0S7GKU3;A0A0S7GLM7;A0A0S7GNH5;A0A1A7WGD9;A0A1A7Z4A6;A0A1A8AIC9;A0A1A8DRB6;A0A1A8GCR2;A0A1A8KF62;A0A1A8MAY9;A0A1A8MXE6;A0A1A8QNY9;A0A1A8RNY5;A0A1A8SFC1;A0A1A8UI02;A0A060XII9;A0A060XJX9;A0A087XQU7;A0A146NIL5;A0A146NIU7;A0A146NJR6;A0A146Q523;A0A146Z4H1;A0A146Z4J7;A0A146Z4K2;A0A146Z4L3;A0A146Z…	7.67321	210.65	LIQSHPEAVDDIQEK		52.66	861.44	1720.86	2	2.68113	42.2016
	G3Q398;A0A0D9SGF6;A0A0P7V2T7;A0A0P7VEP4;A0A0R4IJ08;A0A0S7GFR3;A0A0S7GFS2;A0A0S7GG64;A0A0S7GKU3;A0A0S7GLM7;A0A1A7WGD9;A0A1A7Z4A6;A0A1A8D2Q6;A0A1A8D8C3;A0A1A8GCR2;A0A1A8I584;A0A1A8KR84;A0A1A8MAY9;A0A1A8QC83;A0A1A8SFC1;A0A1A8UI02;A0A060XII9;A0A060XJX9;A0A087XQU7;A0A146NJR6;A0A146Q523;A0A146Z4H1;A0A146Z4J7;A0A146Z4K2;A0A146Z4L3;A0A146Z4P1;A0A146Z5L2;A0A146Z6F5;A0A146Z650;F1R443;F1R446;G3Q393;H2MBY2;H…	1.0417	0.0543832	LREANQQQQFNR		52.37	511.262	1530.76	3	-4.27043	20.2292
	G3Q398;A0A0D9SGF6;A0A0P7V2T7;A0A0P7VEP4;A0A0R4IJ08;A0A0S7GKE8;A0A0S7GMT1;A0A0S7GQA6;A0A1A7WGD9;A0A1A7Z4A6;A0A1A8D2Q6;A0A1A8D8C3;A0A1A8GCR2;A0A1A8I584;A0A1A8KR84;A0A1A8MAY9;A0A1A8QC83;A0A1A8SFC1;A0A1A8UI02;A0A060XII9;A0A060XJX9;A0A087XQU7;A0A146Q523;A0A146Z4H1;A0A146Z4K2;A0A146Z4L3;A0A146Z4P1;A0A146Z5L2;A0A146Z6F5;F1R443;F1R446;G3Q393;H2UIA9;H2UIB0;H2UIB1;H3C0G3;H3CBT9;I3JZ89;I3JZ90;M4A8R0;Q4T9R4;…	0.0367097	0.749109	DVDETISWIK		51.1	603.309	1204.6	2	2.06903	95.814
	G3Q398;A0A0D9SGF6;A0A0P7VEP4;A0A0R4IJ08;A0A0S7GFR3;A0A0S7GFS2;A0A0S7GG64;A0A0S7GKU3;A0A0S7GLM7;A0A1A7WGD9;A0A1A7Z4A6;A0A1A8D2Q6;A0A1A8D8C3;A0A1A8GCR2;A0A1A8I584;A0A1A8KR84;A0A1A8MAY9;A0A1A8QC83;A0A1A8SFC1;A0A1A8UI02;A0A060XII9;A0A060XJX9;A0A087XQU7;A0A146NJR6;A0A146Q523;A0A146Z4H1;A0A146Z4J7;A0A146Z4K2;A0A146Z4L3;A0A146Z4P1;A0A146Z5L2;A0A146Z6F5;A0A146Z650;F1R443;F1R446;G3Q393;H2UIA9;H2UIB0;H2UIB…	1.30642	0.821557	LLEATELK		50.6	458.772	915.529	2	-0.816887	51.8015
	G3Q398;A0A0P7VEP4;A0A0S7GKE8;A0A0S7GMT1;A0A0S7GQA6;A0A060XII9;A0A060XJX9;A0A087XQU7;G3Q393;H2MBY2;M4A8R0;W5KTF3;W5KTG2	0.00302745	0.927096	LQQTHPQNASQIHLK		50.1	581.649	1741.92	3	2.82737	28.7175
	G3Q398;A0A0D9SGF6;A0A0P7VEP4;A0A060XII9;A0A060XJX9;G3Q393;H2MBY2;H2UIA9;H2UIB0;H2UIB1;H3C0G3;H3CBT9;I3JZ89;I3JZ90;Q4T9R4;Q4T9R5;Q13813;W5KTF3;W5KTG2	0.245887	216.521	EKEPIAASTNR		49.93	405.882	1214.62	3	-5.4443	13.345
	G3Q398;A0A0P7VEP4;A0A0R4IJ08;A0A060XII9;A0A060XJX9;F1R443;F1R446;G3Q393;H2UIA9;H2UIB0;H2UIB1;H3C0G3;H3CBT9;I3JZ89;I3JZ90;Q4T9R4;W5KTF3;W5KTG2;W5MFM2;W5MFP4	0.837064	1.10897	LLVSSEDYGRDLTGVQNLR		48.03	712.376	2134.11	3	2.65968	98.3523
	G3Q398;A0A0D9SGF6;A0A0P7V2T7;A0A0P7VEP4;A0A0R4IJ08;A0A0S7GFQ2;A0A0S7GFQ8;A0A0S7GFR3;A0A0S7GFS1;A0A0S7GFS2;A0A0S7GFS3;A0A0S7GG64;A0A0S7GGW2;A0A0S7GGW7;A0A0S7GI92;A0A0S7GKU3;A0A0S7GLM7;A0A0S7GLW5;A0A0S7GNH5;A0A1A7WGD9;A0A1A7Z4A6;A0A1A8AIC9;A0A1A8DRB6;A0A1A8GCR2;A0A1A8KF62;A0A1A8MAY9;A0A1A8MXE6;A0A1A8QNY9;A0A1A8RNY5;A0A1A8SFC1;A0A1A8UI02;A0A060XII9;A0A060XJX9;A0A087XQU7;A0A146NIL5;A0A146NIU7;A0A146N…	0.953975	0.827656	DLTGVQNLR		47.62	508.28	1014.55	2	-4.07736	50.4624
	G3Q398;A0A0P7VEP4;A0A0S7GKE8;A0A0S7GMT1;A0A0S7GQA6;A0A060XII9;A0A060XJX9;A0A087XQU7;G3Q393;H2MBY2;M4A8R0;W5KTF3;W5KTG2	0.108311	0.892203	LQQTHPQNASQIHLK		47.42	436.489	1741.93	4	4.37772	28.7175
	G3Q398;A0A0D9SGF6;A0A0P7V2T7;A0A0P7VEP4;A0A0R4IJ08;A0A0S7GFQ8;A0A0S7GFR3;A0A0S7GFS1;A0A0S7GFS2;A0A0S7GFS3;A0A0S7GFT9;A0A0S7GG64;A0A0S7GGW2;A0A0S7GGW7;A0A0S7GKU3;A0A0S7GLM7;A0A0S7GNH5;A0A1A7WGD9;A0A1A7Z4A6;A0A1A8AIC9;A0A1A8DRB6;A0A1A8GCR2;A0A1A8KF62;A0A1A8MAY9;A0A1A8MXE6;A0A1A8QNY9;A0A1A8RNY5;A0A1A8SFC1;A0A1A8UI02;A0A060XII9;A0A060XJX9;A0A087XQU7;A0A146NIL5;A0A146NIU7;A0A146NJR6;A0A146Q523;A0A146Z…	11.0449	93.973	SKLGESQTLQQFSR		46.81	536.945	1607.81	3	-10.3331	53.0722
	G3Q398;G3Q393	1.04031	8.8052	AVTQKGEAMVEEGHFAAEDVK		42.84	562.277	2245.08	4	4.12197	58.25
	G3Q398;A0A0D9SGF6;A0A0P7V2T7;A0A0P7VEP4;A0A0R4IJ08;A0A0S7GFS1;A0A0S7GFS2;A0A0S7GFS3;A0A0S7GG64;A0A0S7GGW2;A0A0S7GGW7;A0A0S7GI92;A0A0S7GKU3;A0A0S7GLM7;A0A0S7GLW5;A0A060XII9;A0A087XQU7;A0A146NIL5;A0A146NIU7;A0A146NJR6;A0A146Q523;A0A146Z4J7;A0A146Z4K2;A0A146Z4L3;A0A146Z4P1;A0A146Z6F5;A0A146Z650;C0PUV6;F1R443;F1R446;G3Q393;H2MBY2;H2UGD2;H2UIA9;H2UIB0;H2UIB1;H3C0G3;H3CBT9;I3JZ89;I3JZ90;M4A8R0;Q4T9R4;Q…	1.20725	0.827429	ENSLKTDDYGR		38.31	433.213	1296.62	3	19.998	19.9438
	G3Q398;A0A0D9SGF6;A0A0P7V2T7;A0A0P7VEP4;A0A0R4IJ08;A0A0S7GFQ8;A0A0S7GFR3;A0A0S7GFS1;A0A0S7GFS2;A0A0S7GFS3;A0A0S7GFT9;A0A0S7GG64;A0A0S7GGW2;A0A0S7GGW7;A0A0S7GKU3;A0A0S7GLM7;A0A0S7GNH5;A0A1A7WGD9;A0A1A7Z4A6;A0A1A8AIC9;A0A1A8DRB6;A0A1A8GCR2;A0A1A8KF62;A0A1A8MAY9;A0A1A8MXE6;A0A1A8QNY9;A0A1A8RNY5;A0A1A8SFC1;A0A1A8UI02;A0A060XII9;A0A060XJX9;A0A087XQU7;A0A146NIL5;A0A146NIU7;A0A146NJR6;A0A146Q523;A0A146Z…	1.03591	0.81451	LGESQTLQQFSR		37.01	465.242	1392.7	3	2.45396	58.6754
	G3Q398;A0A0D9SGF6;A0A0P7VEP4;A0A0R4IJ08;A0A0S7GFS1;A0A0S7GFS2;A0A0S7GFS3;A0A0S7GG64;A0A0S7GGW2;A0A0S7GGW7;A0A0S7GI92;A0A0S7GKU3;A0A0S7GLM7;A0A0S7GLW5;A0A1A7WGD9;A0A1A7Z4A6;A0A1A8AIC9;A0A1A8DRB6;A0A1A8GCR2;A0A1A8KF62;A0A1A8MAY9;A0A1A8MXE6;A0A1A8QNY9;A0A1A8RNY5;A0A1A8SFC1;A0A1A8UI02;A0A060XII9;A0A060XJX9;A0A087XQU7;A0A146NIL5;A0A146NIU7;A0A146NJR6;A0A146Q523;A0A146Z4J7;A0A146Z4K2;A0A146Z4L3;A0A146Z…	1.53291	0.988724	KVEDLFLTFAK		36.93	655.857	1309.7	2	-23.1591	119.386
	G3Q398;A0A0D9SGF6;A0A0P7V2T7;A0A0P7VEP4;A0A0R4IJ08;A0A0S7GFR3;A0A0S7GFS2;A0A0S7GG64;A0A0S7GKU3;A0A0S7GLM7;A0A1A7WGD9;A0A1A7Z4A6;A0A1A8D2Q6;A0A1A8GCR2;A0A1A8I584;A0A1A8KR84;A0A1A8MAY9;A0A1A8SFC1;A0A060XII9;A0A060XJX9;A0A087XQU7;A0A146NIL5;A0A146NIU7;A0A146NJR6;A0A146Q523;A0A146Z4H1;A0A146Z4J7;A0A146Z4L3;A0A146Z4P1;A0A146Z5L2;A0A146Z6F5;A0A146Z650;F1R443;F1R446;G3Q393;H2MBY2;H2UIA9;H2UIB0;H2UIB1;H3…	1.12398	1.23248	GKDLIGVQNLLKK		36.53	357.226	1424.87	4	2.74437	80.7888
	G3Q398;A0A0D9SGF6;A0A0P7V2T7;A0A0P7VEP4;A0A0R4IJ08;A0A0S7GFQ8;A0A0S7GFR3;A0A0S7GFS1;A0A0S7GFS2;A0A0S7GFS3;A0A0S7GFT9;A0A0S7GG64;A0A0S7GGW2;A0A0S7GGW7;A0A0S7GKU3;A0A0S7GLM7;A0A0S7GNH5;A0A1A7WGD9;A0A1A7Z4A6;A0A1A8AIC9;A0A1A8DRB6;A0A1A8GCR2;A0A1A8KF62;A0A1A8MAY9;A0A1A8MXE6;A0A1A8QNY9;A0A1A8RNY5;A0A1A8SFC1;A0A1A8UI02;A0A060XII9;A0A060XJX9;A0A087XQU7;A0A146NIL5;A0A146NIU7;A0A146NJR6;A0A146Q523;A0A146Z…	1.03818	173.829	KHEDFDKAINVQEEK		32.61	458.234	1828.91	4	4.44861	30.8362
F1R446	83	1.51961	1.01947	83
	F1R446;A0A0D9SGF6;A0A0R4IJ08;A0A0S7GFR3;A0A0S7GFS1;A0A0S7GFS2;A0A0S7GFS3;A0A0S7GG64;A0A0S7GGW2;A0A0S7GGW7;A0A0S7GKU3;A0A0S7GLM7;A0A0S7GNH5;A0A1A7WGD9;A0A1A7Z4A6;A0A1A8GCR2;A0A1A8MAY9;A0A1A8MXE6;A0A1A8QNY9;A0A1A8RNY5;A0A1A8SFC1;A0A060XII9;A0A060XJX9;A0A087XQU7;A0A146NIL5;A0A146NIU7;A0A146NJR6;A0A146Q523;A0A146Z4H1;A0A146Z4J7;A0A146Z4K2;A0A146Z4L3;A0A146Z4P1;A0A146Z5L2;A0A146Z6F5;A0A146Z650;F1QDX2;…	1.10634	0.946459	NQALNTDNYGHDLASVQALQR		127.8	776.717	2327.13	3	-0.924291	82.1301
	F1R446;A0A0R4IJ08;A0A0S7GFS1;A0A0S7GFS2;A0A0S7GFS3;A0A0S7GG64;A0A0S7GGW2;A0A0S7GGW7;A0A0S7GI92;A0A0S7GKU3;A0A0S7GLM7;A0A0S7GLW5;A0A1A7WGD9;A0A1A7Z4A6;A0A1A8AIC9;A0A1A8DRB6;A0A1A8GCR2;A0A1A8KF62;A0A1A8MAY9;A0A1A8MXE6;A0A1A8QNY9;A0A1A8RNY5;A0A1A8SFC1;A0A1A8UI02;A0A060XII9;A0A060XJX9;A0A087XQU7;A0A146NIL5;A0A146NIU7;A0A146NJR6;A0A146Q523;A0A146Z4J7;A0A146Z4K2;A0A146Z4L3;A0A146Z4P1;A0A146Z6F5;A0A146Z…	1.12788	1556.08	LNLVGSEDYGDTLAAVQGLLK		115.77	726.054	2175.14	3	0.603017	171.724
	F1R446;A0A0R4IJ08;A0A0S7GFS1;A0A0S7GFS2;A0A0S7GFS3;A0A0S7GG64;A0A0S7GGW2;A0A0S7GGW7;A0A0S7GI92;A0A0S7GKU3;A0A0S7GLM7;A0A0S7GLW5;A0A1A7WGD9;A0A1A7Z4A6;A0A1A8AIC9;A0A1A8DRB6;A0A1A8GCR2;A0A1A8KF62;A0A1A8MAY9;A0A1A8MXE6;A0A1A8QNY9;A0A1A8RNY5;A0A1A8SFC1;A0A1A8UI02;A0A060XII9;A0A060XJX9;A0A087XQU7;A0A146NIL5;A0A146NIU7;A0A146NJR6;A0A146Q523;A0A146Z4J7;A0A146Z4K2;A0A146Z4L3;A0A146Z4P1;A0A146Z6F5;A0A146Z…	16.1158	1.01947	LNLVGSEDYGDTLAAVQGLLK		109.97	1088.58	2175.15	2	6.71343	175.929
	F1R446;A0A0D9SGF6;A0A0P7V2T7;A0A0P7VEP4;A0A0R4IJ08;A0A0S7GFS1;A0A0S7GFS2;A0A0S7GFS3;A0A0S7GG64;A0A0S7GGW2;A0A0S7GGW7;A0A0S7GI92;A0A0S7GKU3;A0A0S7GLM7;A0A0S7GLW5;A0A1A7WGD9;A0A1A7Z4A6;A0A1A8AIC9;A0A1A8DRB6;A0A1A8GCR2;A0A1A8KF62;A0A1A8MAY9;A0A1A8MXE6;A0A1A8QNY9;A0A1A8RNY5;A0A1A8SFC1;A0A1A8UI02;A0A1B0GV13;A0A060XII9;A0A060XJX9;A0A087XQU7;A0A146NIL5;A0A146NIU7;A0A146NJR6;A0A146Q523;A0A146Z4J7;A0A146Z…	1.62303	0.582025	LDENSAFLQFNWK		109.63	806.398	1610.78	2	7.24726	133.8
	F1R446;A0A0R4IJ08;A0A060XII9;A0A060XJX9;F1QDX2;F1R443;H2UIB1;H3CBT9;I3JZ89;I3JZ90;Q4T9R4;Q4T9R5	1.59564	1.6447	LAVQTTANFNTIK		107.46	710.894	1419.77	2	3.10611	73.2969
	F1R446;A0A0P7V2T7;A0A0P7VEP4;A0A0R4IJ08;A0A0S7GKE8;A0A0S7GMT1;A0A0S7GQA6;A0A1A7WGD9;A0A1A7Z4A6;A0A1A8D2Q6;A0A1A8D8C3;A0A1A8GCR2;A0A1A8I584;A0A1A8KR84;A0A1A8MAY9;A0A1A8QC83;A0A1A8SFC1;A0A1A8UI02;A0A060XII9;A0A060XJX9;A0A087XQU7;A0A146Q523;A0A146Z4H1;A0A146Z4K2;A0A146Z4L3;A0A146Z4P1;A0A146Z5L2;A0A146Z6F5;A0A146Z650;F1R443;G3Q393;G3Q398;H2MBY2;I3JZ89;I3JZ90;M4A8R0;Q566W8;W5KTF3;W5KTG2;W5MFM2;W5MFP4	3.19093	1.85266	ALINADELANDVAGAEALLDR		107	718.709	2153.11	3	2.54416	185.541
	F1R446;A0A0D9SGF6;A0A0P7V2T7;A0A0P7VEP4;A0A0R4IJ08;A0A0S7GFS2;A0A0S7GFS3;A0A0S7GGW7;A0A0S7GI92;A0A0S7GKU3;A0A1A7WGD9;A0A1A7Z4A6;A0A1A8AIC9;A0A1A8DRB6;A0A1A8GCR2;A0A1A8KF62;A0A1A8MAY9;A0A1A8MXE6;A0A1A8QNY9;A0A1A8RNY5;A0A1A8SFC1;A0A1A8UI02;A0A060XII9;A0A060XJX9;A0A087XQU7;A0A146NIU7;A0A146Q523;A0A146Z4J7;A0A146Z4L3;A0A146Z4P1;A0A146Z6F5;A0A146Z650;C0PUV6;F1R443;F1R445;F8K8N3;G3Q393;G3Q398;H2MBY2;H2…	2.21306	2.37499	IEDLGAAMEEALILDNK		106.2	922.972	1843.93	2	5.60561	153.845
	F1R446;A0A0D9SGF6;A0A0P7V2T7;A0A0P7VEP4;A0A0R4IJ08;A0A0S7GFS2;A0A0S7GFS3;A0A0S7GGW7;A0A0S7GI92;A0A0S7GKU3;A0A1A7WGD9;A0A1A7Z4A6;A0A1A8AIC9;A0A1A8DRB6;A0A1A8GCR2;A0A1A8KF62;A0A1A8MAY9;A0A1A8MXE6;A0A1A8QNY9;A0A1A8RNY5;A0A1A8SFC1;A0A1A8UI02;A0A060XII9;A0A060XJX9;A0A087XQU7;A0A146NIU7;A0A146Q523;A0A146Z4J7;A0A146Z4L3;A0A146Z4P1;A0A146Z6F5;A0A146Z650;C0PUV6;F1R443;F1R445;F8K8N3;G3Q393;G3Q398;H2MBY2;H2…	12.4474	0.768997	KIEDLGAAMEEALILDNK		99.23	658.351	1972.03	3	5.84731	152.693
	F1R446;A0A0D9SGF6;A0A0P7V2T7;A0A0P7VEP4;A0A0R4IJ08;A0A0S7GFR3;A0A0S7GFS2;A0A0S7GG64;A0A0S7GKU3;A0A0S7GLM7;A0A1A7WGD9;A0A1A7Z4A6;A0A1A8D2Q6;A0A1A8GCR2;A0A1A8I584;A0A1A8KR84;A0A1A8MXE6;A0A1A8QNY9;A0A1A8SFC1;A0A060XII9;A0A060XJX9;A0A146NIL5;A0A146NIU7;A0A146NJR6;A0A146Q523;A0A146Z4H1;A0A146Z4J7;A0A146Z4K2;A0A146Z4L3;A0A146Z4P1;A0A146Z5L2;A0A146Z6F5;A0A146Z650;F1R443;G3Q393;G3Q398;H2UIB0;H2UIB1;H3CBT…	1.03818	2427.31	QQVAPTDDETGKELVLALYDYQEK		96.33	918.458	2752.35	3	4.07101	131.026
	F1R446;A0A0D9SGF6;A0A0P7V2T7;A0A0R4IJ08;A0A0S7GFR3;A0A0S7GFS2;A0A0S7GG64;A0A0S7GKU3;A0A0S7GLM7;A0A1A7WGD9;A0A1A7Z4A6;A0A1A8D2Q6;A0A1A8D8C3;A0A1A8GCR2;A0A1A8I584;A0A1A8KR84;A0A1A8MAY9;A0A1A8RNY5;A0A1A8SFC1;A0A060XII9;A0A060XJX9;A0A087XQU7;F1R443;G3Q393;G3Q398;H2MBY2;I3JZ89;I3JZ90;M4A8R0;Q13813;W5KTF3;W5KTG2;W5MFM2;W5MFP4	1.03818	1.24516	RQDLEDSLQAQQYFADANEAESWMR		95.41	1001.12	3000.34	3	4.19052	134.37
	F1R446;A0A0R4IJ08;A0A0S7GFQ2;A0A0S7GFQ8;A0A0S7GFR3;A0A0S7GFS1;A0A0S7GFS2;A0A0S7GFS3;A0A0S7GG64;A0A0S7GGW2;A0A0S7GGW7;A0A0S7GI92;A0A0S7GKU3;A0A0S7GLM7;A0A0S7GLW5;A0A0S7GNH5;A0A1A7WGD9;A0A1A7Z4A6;A0A1A8AIC9;A0A1A8DRB6;A0A1A8GCR2;A0A1A8KF62;A0A1A8MAY9;A0A1A8MXE6;A0A1A8QNY9;A0A1A8RNY5;A0A1A8SFC1;A0A1A8UI02;A0A060XII9;A0A087XQU7;A0A146NIL5;A0A146NIU7;A0A146NJR6;A0A146Q523;A0A146Z4H1;A0A146Z4J7;A0A146Z…	1.47246	0.92686	GVIDTGNALIQR		93.15	628.853	1255.69	2	1.68535	71.0409
	F1R446;A0A0D9SGF6;A0A0P7V2T7;A0A0P7VEP4;A0A0R4IJ08;A0A1A7WGD9;A0A1A7Z4A6;A0A1A8D2Q6;A0A1A8D8C3;A0A1A8GCR2;A0A1A8I584;A0A1A8KR84;A0A1A8MAY9;A0A1A8QC83;A0A1A8SFC1;A0A1A8UI02;A0A060XII9;A0A060XJX9;A0A087XQU7;A0A146Q523;A0A146Z4H1;A0A146Z4J7;A0A146Z4K2;A0A146Z4L3;A0A146Z4P1;A0A146Z5L2;A0A146Z6F5;A0A146Z650;F1R443;G3Q393;G3Q398;H2MBY2;H2UIA9;H2UIB0;H2UIB1;H3C0G3;H3CBT9;I3JZ89;I3JZ90;M4A8R0;Q4T9R4;Q4T9…	1.02938	1.07542	HQAFEAELSANQSR		92.43	529.923	1586.75	3	4.18109	40.423
	F1R446;A0A0D9SFH4;A0A0D9SGF6;A0A0P7V2T7;A0A0P7VEP4;A0A0R4IJ08;A0A0S7GFS2;A0A0S7GFS3;A0A0S7GGW7;A0A0S7GI92;A0A0S7GKU3;A0A1A7WGD9;A0A1A7Z4A6;A0A1A8AIC9;A0A1A8DRB6;A0A1A8GCR2;A0A1A8KF62;A0A1A8MAY9;A0A1A8MXE6;A0A1A8QNY9;A0A1A8RNY5;A0A1A8SFC1;A0A1A8UI02;A0A060XII9;A0A060XJX9;A0A087XQU7;A0A146NIU7;A0A146Q523;A0A146Z4J7;A0A146Z4L3;A0A146Z4P1;A0A146Z650;C0PUV6;F1R443;F1R445;F8K8N3;G3Q393;G3Q398;H2MBY2;H2…	1.80805	0.865306	SSEEIESAFR		88.75	577.771	1153.53	2	-1.61916	51.3788
	F1R446;A0A0P7VEP4;A0A0R4IJ08;A0A0S7GFS1;A0A0S7GFS2;A0A0S7GFS3;A0A0S7GG64;A0A0S7GGW2;A0A0S7GGW7;A0A0S7GI92;A0A0S7GKU3;A0A0S7GLM7;A0A0S7GLW5;A0A1A7WGD9;A0A1A7Z4A6;A0A1A8AIC9;A0A1A8DRB6;A0A1A8GCR2;A0A1A8KF62;A0A1A8MAY9;A0A1A8MXE6;A0A1A8QNY9;A0A1A8RNY5;A0A1A8SFC1;A0A1A8UI02;A0A060XII9;A0A060XJX9;A0A087XQU7;A0A146NIL5;A0A146NIU7;A0A146NJR6;A0A146Q523;A0A146Z4J7;A0A146Z4K2;A0A146Z4L3;A0A146Z4P1;A0A146Z…	145.971	0.577478	QETFDAGLQAFQQEGITNITALK		88.67	841.766	2522.28	3	3.03161	153.268
	F1R446;A0A0R4IJ08;A0A060XII9;A0A060XJX9;F1R443;W5KTF3;W5KTG2	2.25083	1.26027	ENLLDEQGSIGLR		87.54	722.375	1442.74	2	-2.74321	85.0251
	F1R446;A0A0D9SGF6;A0A0P7VEP4;A0A0R4IJ08;A0A0S7GFS2;A0A0S7GFS3;A0A0S7GGW7;A0A0S7GI92;A0A0S7GKU3;A0A1A7WGD9;A0A1A7Z4A6;A0A1A8AIC9;A0A1A8DRB6;A0A1A8GCR2;A0A1A8KF62;A0A1A8MAY9;A0A1A8MXE6;A0A1A8QNY9;A0A1A8RNY5;A0A1A8SFC1;A0A1A8UI02;A0A060XII9;A0A060XJX9;A0A087XQU7;A0A146NIU7;A0A146Q523;A0A146Z4J7;A0A146Z4L3;A0A146Z4P1;A0A146Z6F5;A0A146Z650;C0PUV6;F1R443;F1R445;F8K8N3;G3Q393;G3Q398;H2MBY2;H2UGD2;H3C0G3…	0.233289	0.00119199	YTEHSTVGLAQQWDQLDQLGMR		87.43	859.415	2575.22	3	5.41344	132.586
	F1R446;A0A0D9SGF6;A0A0P7VEP4;A0A0R4IJ08;A0A060XII9;A0A060XJX9;F1R443;G3Q393;G3Q398;H2UIA9;H2UIB0;H2UIB1;H3C0G3;H3CBT9;I3JZ89;I3JZ90;Q4T9R4;Q4T9R5;Q566W8;Q13813;W5KTF3;W5KTG2;W5MFM2;W5MFP4	1.14844	0.843343	LFGAAEVQR		87	495.772	989.53	2	0.100762	47.4206
	F1R446;A0A0D9SGF6;A0A0P7V2T7;A0A0R4IJ08;A0A1A7WGD9;A0A1A7Z4A6;A0A1A8D2Q6;A0A1A8GCR2;A0A1A8I584;A0A1A8KR84;A0A1A8MXE6;A0A1A8QNY9;A0A1A8SFC1;A0A060XII9;A0A060XJX9;F1R443;G3Q393;G3Q398;Q13813;W5KTF3;W5KTG2	1.54542	1.00188	EANELQQWINEK		84.85	751.369	1500.72	2	1.77925	86.718
	F1R446;A0A0D9SGF6;A0A0P7VEP4;A0A0R4IJ08;A0A0S7GFQ8;A0A0S7GFR3;A0A0S7GFS1;A0A0S7GFS2;A0A0S7GFS3;A0A0S7GFT9;A0A0S7GG64;A0A0S7GGW2;A0A0S7GGW7;A0A0S7GKU3;A0A0S7GLM7;A0A0S7GNH5;A0A1A7WGD9;A0A1A7Z4A6;A0A1A8AIC9;A0A1A8DRB6;A0A1A8GCR2;A0A1A8KF62;A0A1A8MAY9;A0A1A8MXE6;A0A1A8QNY9;A0A1A8RNY5;A0A1A8SFC1;A0A1A8UI02;A0A060XII9;A0A060XJX9;A0A087XQU7;A0A146NIL5;A0A146NIU7;A0A146NJR6;A0A146Q523;A0A146Z4H1;A0A146Z…	639.152	1.0256	DCEQAENWMAAR	[2] Methylthio (C)	84.18	735.286	1468.56	2	4.578	79.8609
	F1R446;A0A0R4IJ08;A0A0S7GFR3;A0A0S7GFS2;A0A0S7GG64;A0A0S7GKU3;A0A0S7GLM7;A0A1A7WGD9;A0A1A7Z4A6;A0A1A8D2Q6;A0A1A8D8C3;A0A1A8GCR2;A0A1A8I584;A0A1A8KR84;A0A1A8QNY9;A0A1A8SFC1;A0A060XII9;A0A060XJX9;A0A087XQU7;A0A146NIL5;A0A146NIU7;A0A146NJR6;A0A146Q523;A0A146Z4H1;A0A146Z4J7;A0A146Z4K2;A0A146Z4L3;A0A146Z4P1;A0A146Z5L2;A0A146Z6F5;A0A146Z650;F1R443;H2UIA9;H2UIB0;H2UIB1;M4A8R0;W5KTF3;W5KTG2	1.21813	0.849124	EKEPIVGSPDYGKDEDSAEALLK		83.57	623.313	2489.22	4	0.933673	82.5533
	F1R446;A0A0D9SGF6;A0A0P7V2T7;A0A0R4IJ08;A0A0S7GFR3;A0A0S7GFS1;A0A0S7GFS2;A0A0S7GFS3;A0A0S7GG64;A0A0S7GGW2;A0A0S7GGW7;A0A0S7GKU3;A0A0S7GLM7;A0A0S7GNH5;A0A1A7WGD9;A0A1A7Z4A6;A0A1A8AIC9;A0A1A8DRB6;A0A1A8GCR2;A0A1A8MAY9;A0A1A8MXE6;A0A1A8QNY9;A0A1A8RNY5;A0A1A8SFC1;A0A1A8UI02;A0A060XII9;A0A060XJX9;A0A087XQU7;A0A146NIL5;A0A146NIU7;A0A146NJR6;A0A146Q523;A0A146Z4H1;A0A146Z4J7;A0A146Z4K2;A0A146Z4L3;A0A146Z…	342.749	49.8991	DADETKEWIEEK		83.48	746.846	1491.68	2	5.32486	44.8114
	F1R446;A0A0D9SGF6;A0A0P7V2T7;A0A0P7VEP4;A0A0R4IJ08;A0A0S7GFQ8;A0A0S7GFR3;A0A0S7GFS1;A0A0S7GFS2;A0A0S7GFS3;A0A0S7GFT9;A0A0S7GG64;A0A0S7GGW2;A0A0S7GGW7;A0A0S7GKU3;A0A0S7GLM7;A0A0S7GNH5;A0A1A7WGD9;A0A1A7Z4A6;A0A1A8AIC9;A0A1A8DRB6;A0A1A8GCR2;A0A1A8KF62;A0A1A8MAY9;A0A1A8MXE6;A0A1A8QNY9;A0A1A8RNY5;A0A1A8SFC1;A0A1A8UI02;A0A060XII9;A0A060XJX9;A0A087XQU7;A0A146NIL5;A0A146NIU7;A0A146NJR6;A0A146Q523;A0A146Z…	1.58256	1.52869	DVTGAEALLER		82.72	587.31	1172.6	2	3.83635	77.9559
	F1R446;A0A0D9SGF6;A0A0P7V2T7;A0A0P7VEP4;A0A0R4IJ08;A0A1A7WGD9;A0A1A7Z4A6;A0A1A8D2Q6;A0A1A8D8C3;A0A1A8GCR2;A0A1A8I584;A0A1A8KR84;A0A1A8MAY9;A0A1A8QC83;A0A1A8SFC1;A0A1A8UI02;A0A060XII9;A0A060XJX9;A0A087XQU7;A0A146Q523;A0A146Z4H1;A0A146Z4J7;A0A146Z4K2;A0A146Z4L3;A0A146Z4P1;A0A146Z5L2;A0A146Z6F5;A0A146Z650;F1R443;G3Q393;G3Q398;H2MBY2;H2UIA9;H2UIB0;H2UIB1;H3C0G3;H3CBT9;I3JZ89;I3JZ90;M4A8R0;Q4T9R4;Q4T9…	1.36222	1.05396	HQAFEAELSANQSR		82.34	794.38	1586.75	2	3.32603	40.4952
	F1R446;A0A0D9SGF6;A0A0P7V2T7;A0A0P7VEP4;A0A0R4IJ08;A0A0S7GKE8;A0A0S7GMT1;A0A0S7GQA6;A0A1A7WGD9;A0A1A7Z4A6;A0A1A8D2Q6;A0A1A8D8C3;A0A1A8GCR2;A0A1A8I584;A0A1A8KR84;A0A1A8MAY9;A0A1A8QC83;A0A1A8SFC1;A0A1A8UI02;A0A060XII9;A0A060XJX9;A0A087XQU7;A0A146Q523;A0A146Z4H1;A0A146Z4K2;A0A146Z4L3;A0A146Z4P1;A0A146Z5L2;A0A146Z6F5;F1R443;G3Q393;G3Q398;H2MBY2;H2UIA9;H2UIB0;H2UIB1;H3C0G3;H3CBT9;I3JZ89;I3JZ90;M4A8R0;…	13.9598	12.7181	DLASVQALLR		82.27	543.319	1084.62	2	4.01573	111.985
	F1R446;A0A0R4IJ08;A0A0S7GFS1;A0A0S7GFS2;A0A0S7GFS3;A0A0S7GG64;A0A0S7GGW2;A0A0S7GGW7;A0A0S7GI92;A0A0S7GKU3;A0A0S7GLM7;A0A0S7GLW5;A0A1A7WGD9;A0A1A7Z4A6;A0A1A8AIC9;A0A1A8DRB6;A0A1A8GCR2;A0A1A8KF62;A0A1A8MAY9;A0A1A8MXE6;A0A1A8QNY9;A0A1A8RNY5;A0A1A8SFC1;A0A1A8UI02;A0A060XII9;A0A060XJX9;A0A087XQU7;A0A146NIL5;A0A146NIU7;A0A146NJR6;A0A146Q523;A0A146Z4J7;A0A146Z4L3;A0A146Z4P1;A0A146Z6F5;A0A146Z650;C0PUV6;…	0.00243808	1.43642	QETFDAGLQAFQQEGITNITALKDQLLAAK		81.55	1088.24	3261.69	3	0.395662	190.428
	F1R446;A0A0R4IJ08;A0A0S7GKE8;A0A0S7GKV9;A0A0S7GQU7;A0A1A8D2Q6;A0A1A8D8C3;A0A1A8GCR2;A0A1A8I584;A0A1A8KR84;A0A1A8MAY9;A0A1A8QC83;A0A1A8SFC1;A0A1A8UI02;A0A060XII9;A0A060XJX9;A0A087XQU7;A0A146Z4H1;A0A146Z4K2;A0A146Z4L3;A0A146Z4P1;A0A146Z5L2;A0A146Z6F5;F1R443;G3Q393;G3Q398;H2MBY2;I3JZ89;I3JZ90;M4A8R0;Q32P38;Q566W8;W5KTF3;W5KTG2;W5MFM2;W5MFP4	3.59038	0.31157	DADELEKWIQEK		80.79	752.37	1502.73	2	-2.72521	95.8845
	F1R446;A0A0D9SGF6;A0A0P7V2T7;A0A0P7VEP4;A0A0R4IJ08;A0A0S7GFS1;A0A0S7GFS2;A0A0S7GFS3;A0A0S7GG64;A0A0S7GGW2;A0A0S7GGW7;A0A0S7GI92;A0A0S7GKU3;A0A0S7GLM7;A0A0S7GLW5;A0A1A7WGD9;A0A1A7Z4A6;A0A1A8AIC9;A0A1A8DRB6;A0A1A8GCR2;A0A1A8KF62;A0A1A8MAY9;A0A1A8MXE6;A0A1A8QNY9;A0A1A8RNY5;A0A1A8SFC1;A0A1A8UI02;A0A060XII9;A0A060XJX9;A0A087XQU7;A0A146NIL5;A0A146NIU7;A0A146NJR6;A0A146Q523;A0A146Z4J7;A0A146Z4K2;A0A146Z…	3.42187	0.776863	ADVVESWIGEK		80.45	616.814	1231.61	2	3.30561	81.7777
	F1R446;A0A0S7GFS2;A0A0S7GFS3;A0A0S7GGW7;A0A0S7GI92;A0A0S7GKU3;A0A1A7WGD9;A0A1A7Z4A6;A0A1A8AIC9;A0A1A8DRB6;A0A1A8GCR2;A0A1A8KF62;A0A1A8MAY9;A0A1A8MXE6;A0A1A8QNY9;A0A1A8RNY5;A0A1A8SFC1;A0A1A8UI02;A0A060XII9;A0A060XJX9;A0A146NIU7;A0A146Q523;A0A146Z4J7;A0A146Z4L3;A0A146Z4P1;A0A146Z6F5;A0A146Z650;C0PUV6;G3Q393;G3Q398;H2MBY2;H3C0G3;H3CBT9;I3JZ89;Q13813;W5KTG2;W5MFM2	3.63141	5.60988	TYLLDGSCMVEESGTLESQLEATKR	[8] Methylthio (C)	79.79	936.109	2805.3	3	4.90607	152.98
	F1R446;A0A0D9SGF6;A0A0P7V2T7;A0A0P7VEP4;A0A0R4IJ08;A0A0S7GKE8;A0A0S7GMT1;A0A0S7GQA6;A0A1A7WGD9;A0A1A7Z4A6;A0A1A8D2Q6;A0A1A8D8C3;A0A1A8GCR2;A0A1A8I584;A0A1A8KR84;A0A1A8MAY9;A0A1A8QC83;A0A1A8SFC1;A0A1A8UI02;A0A060XII9;A0A060XJX9;A0A087XQU7;A0A146Q523;A0A146Z4H1;A0A146Z4K2;A0A146Z4L3;A0A146Z4P1;A0A146Z5L2;A0A146Z6F5;A0A146Z650;F1R443;G3Q393;G3Q398;H2MBY2;H2UIA9;H2UIB0;H2UIB1;H3C0G3;H3CBT9;I3JZ89;I3J…	4.51153	0.892071	DTEQVDNWMSK		79.45	676.796	1351.58	2	5.05027	55.3468
	F1R446;A0A0R4IJ08;A0A0S7GFS1;A0A0S7GFS2;A0A0S7GFS3;A0A0S7GG64;A0A0S7GGW2;A0A0S7GGW7;A0A0S7GI92;A0A0S7GKU3;A0A0S7GLM7;A0A0S7GLW5;A0A1A7WGD9;A0A1A7Z4A6;A0A1A8AIC9;A0A1A8DRB6;A0A1A8GCR2;A0A1A8KF62;A0A1A8MAY9;A0A1A8MXE6;A0A1A8QNY9;A0A1A8RNY5;A0A1A8SFC1;A0A1A8UI02;A0A060XII9;A0A060XJX9;A0A087XQU7;A0A146NIL5;A0A146NIU7;A0A146NJR6;A0A146Q523;A0A146Z4J7;A0A146Z4L3;A0A146Z4P1;A0A146Z6F5;A0A146Z650;C0PUV6;…	1158.65	1.01947	QETFDAGLQAFQQEGITNITALKDQLLAAK		78.96	816.434	3261.71	4	4.85996	190.921
	F1R446;A0A0R4IJ08;A0A0S7GFS1;A0A0S7GFS2;A0A0S7GFS3;A0A0S7GG64;A0A0S7GGW2;A0A0S7GGW7;A0A0S7GI92;A0A0S7GKU3;A0A0S7GLM7;A0A0S7GLW5;A0A1A7WGD9;A0A1A7Z4A6;A0A1A8AIC9;A0A1A8DRB6;A0A1A8GCR2;A0A1A8KF62;A0A1A8MAY9;A0A1A8MXE6;A0A1A8QNY9;A0A1A8RNY5;A0A1A8SFC1;A0A1A8UI02;A0A060XII9;A0A060XJX9;A0A087XQU7;A0A146NIL5;A0A146NIU7;A0A146NJR6;A0A146Q523;A0A146Z4J7;A0A146Z4L3;A0A146Z4P1;A0A146Z6F5;A0A146Z650;C0PUV6;…	176.05	1.01947	QETFDAGLQAFQQEGITNITALKDQLLAAK	[N-term] Gln->pyro-Glu (N-term Q)	77.51	1082.57	3244.68	3	4.79505	192.126
	F1R446;A0A0P7VEP4;A0A0R4IJ08;A0A0S7GKQ9;A0A0S7GMT1;A0A0S7GRJ6;A0A1A7WGD9;A0A1A7Z4A6;A0A1A8D2Q6;A0A1A8D8C3;A0A1A8GCR2;A0A1A8I584;A0A1A8KR84;A0A1A8MAY9;A0A1A8QC83;A0A1A8SFC1;A0A1A8UI02;A0A060XII9;A0A087XQU7;A0A146Q523;A0A146Z4H1;A0A146Z4K2;A0A146Z4L3;A0A146Z4P1;A0A146Z5L2;A0A146Z6F5;A0A146Z650;F1R443;G3Q393;G3Q398;H2UIA9;H2UIB0;H2UIB1;H3C0G3;H3CBT9;I3JZ89;I3JZ90;M4A8R0;Q4T9R4;Q4T9R5;W5KTF3;W5KTG2;W…	1.19251	1.01947	RAALEDSFHLQQFFR		77.08	622.323	1863.95	3	3.76403	124.952
	F1R446;A0A0R4IJ08;A0A0S7GFR3;A0A0S7GFS3;A0A0S7GG64;A0A0S7GGW2;A0A0S7GKU3;A0A0S7GNH5;A0A1A7WGD9;A0A1A7Z4A6;A0A1A8AIC9;A0A1A8DRB6;A0A1A8GCR2;A0A1A8KF62;A0A1A8MAY9;A0A1A8MXE6;A0A1A8QNY9;A0A1A8RNY5;A0A1A8SFC1;A0A1A8UI02;A0A060XII9;A0A060XJX9;A0A087XQU7;A0A146NIL5;A0A146NIU7;A0A146NJR6;A0A146Z4H1;A0A146Z4P1;G3Q398;H2MBY2;H2UIB0;I3JZ89;M4A8R0;W5KTF3;W5KTG2;W5MFM2;W5MFP4	1.81363	0.890157	LQTATDESYKDPTNIQLSK		77.03	718.032	2151.07	3	1.28737	63.1219
	F1R446;A0A0D9SGF6;A0A0P7V2T7;A0A0P7VEP4;A0A0R4IJ08;A0A0S7GFS1;A0A0S7GFS2;A0A0S7GFS3;A0A0S7GG64;A0A0S7GGW2;A0A0S7GGW7;A0A0S7GI92;A0A0S7GKU3;A0A0S7GLM7;A0A0S7GLW5;A0A1A7WGD9;A0A1A7Z4A6;A0A1A8AIC9;A0A1A8DRB6;A0A1A8GCR2;A0A1A8KF62;A0A1A8MAY9;A0A1A8MXE6;A0A1A8QNY9;A0A1A8RNY5;A0A1A8SFC1;A0A1A8UI02;A0A060XII9;A0A060XJX9;A0A087XQU7;A0A146NIL5;A0A146NIU7;A0A146NJR6;A0A146Q523;A0A146Z4J7;A0A146Z4K2;A0A146Z…	1.51824	0.852764	DLSSVQTLLTK		76.54	602.844	1203.67	2	2.8522	99.131
	F1R446;A0A0P7VEP4;A0A0R4IJ08;A0A0S7GKQ9;A0A0S7GMT1;A0A0S7GRJ6;A0A1A7WGD9;A0A1A7Z4A6;A0A1A8D2Q6;A0A1A8D8C3;A0A1A8GCR2;A0A1A8I584;A0A1A8KR84;A0A1A8MAY9;A0A1A8QC83;A0A1A8SFC1;A0A1A8UI02;A0A060XII9;A0A060XJX9;A0A087XQU7;A0A146Q523;A0A146Z4H1;A0A146Z4K2;A0A146Z4L3;A0A146Z4P1;A0A146Z5L2;A0A146Z6F5;A0A146Z650;F1R443;G3Q393;G3Q398;H2MBY2;H2UIA9;H2UIB0;H2UIB1;H3C0G3;H3CBT9;I3JZ89;I3JZ90;M4A8R0;Q4T9R4;Q4T9…	1.13379	1.01947	DSDELKSWINEK		75.04	732.356	1462.7	2	5.36109	70.5467
	F1R446;A0A0D9SGF6;A0A0P7V2T7;A0A0P7VEP4;A0A0R4IJ08;A0A0S7GFS1;A0A0S7GFS2;A0A0S7GFS3;A0A0S7GG64;A0A0S7GGW2;A0A0S7GGW7;A0A0S7GI92;A0A0S7GKU3;A0A0S7GLM7;A0A0S7GLW5;A0A1A7WGD9;A0A1A7Z4A6;A0A1A8AIC9;A0A1A8DRB6;A0A1A8GCR2;A0A1A8KF62;A0A1A8MAY9;A0A1A8MXE6;A0A1A8QNY9;A0A1A8RNY5;A0A1A8SFC1;A0A1A8UI02;A0A060XII9;A0A060XJX9;A0A087XQU7;A0A146NIL5;A0A146NIU7;A0A146NJR6;A0A146Q523;A0A146Z4J7;A0A146Z4K2;A0A146Z…	1.03818	0.845309	ASAFNSWFENAEEDLTDPVR		74.24	1149.52	2297.03	2	4.16893	161.833
	F1R446;A0A0D9SGF6;A0A0P7VEP4;A0A0R4IJ08;A0A0S7GFR3;A0A0S7GFS2;A0A0S7GG64;A0A0S7GKU3;A0A0S7GLM7;A0A1A7WGD9;A0A1A7Z4A6;A0A1A8D2Q6;A0A1A8GCR2;A0A1A8I584;A0A1A8KR84;A0A1A8MXE6;A0A1A8QNY9;A0A1A8SFC1;A0A060XII9;A0A146NIL5;A0A146NIU7;A0A146NJR6;A0A146Q523;A0A146Z4H1;A0A146Z4J7;A0A146Z4K2;A0A146Z4L3;A0A146Z4P1;A0A146Z5L2;A0A146Z6F5;A0A146Z650;F1R443;G3Q393;G3Q398;H2MBY2;H2UIA9;H2UIB0;H2UIB1;H3C0G3;H3CBT9…	9.89134	42.8179	KGDILTLLNSTNKDWWK		73.99	678.035	2031.08	3	1.34542	153.628
	F1R446;A0A0D9SGF6;A0A0P7VEP4;A0A0R4IJ08;A0A0S7GKE8;A0A0S7GMT1;A0A0S7GQA6;A0A1A7WGD9;A0A1A7Z4A6;A0A1A8D2Q6;A0A1A8D8C3;A0A1A8GCR2;A0A1A8I584;A0A1A8KR84;A0A1A8MAY9;A0A1A8QC83;A0A1A8SFC1;A0A1A8UI02;A0A060XII9;A0A060XJX9;A0A087XQU7;A0A146Q523;A0A146Z4H1;A0A146Z4K2;A0A146Z4L3;A0A146Z4P1;A0A146Z5L2;A0A146Z6F5;A0A146Z650;F1R443;G3Q393;G3Q398;I3JZ89;I3JZ90;M4A8R0;Q566W8;Q13813;W5KTF3;W5KTG2;W5MFM2;W5MFP4	2.07143	0.191413	DLTSWVTEMK		73.73	605.296	1208.58	2	6.47796	114.66
	F1R446;A0A0D9SGF6;A0A0P7V2T7;A0A0R4IJ08;A0A060XJX9;A0A146Q523;A0A146Z4H1;A0A146Z4J7;A0A146Z4K2;A0A146Z4L3;A0A146Z4P1;A0A146Z5L2;A0A146Z6F5;A0A146Z650;F1QDX2;F1R443;G3Q393;G3Q398;H2MBY2;H3C0G3;H3CBT9;I3JZ89;I3JZ90;Q4T9R4;Q4T9R5;Q13813;W5KTF3;W5KTG2;W5MFM2;W5MFP4	1.34405	1.11579	DLAALGDKVNSLGETAER		73.23	620.321	1857.94	3	0.633634	86.0829
	F1R446;A0A0R4IJ08;A0A0S7GFQ8;A0A0S7GFR3;A0A0S7GFS1;A0A0S7GFS2;A0A0S7GFS3;A0A0S7GFT9;A0A0S7GG64;A0A0S7GGW2;A0A0S7GGW7;A0A0S7GKU3;A0A0S7GLM7;A0A0S7GNH5;A0A1A7WGD9;A0A1A7Z4A6;A0A1A8AIC9;A0A1A8DRB6;A0A1A8GCR2;A0A1A8KF62;A0A1A8MAY9;A0A1A8MXE6;A0A1A8QNY9;A0A1A8RNY5;A0A1A8SFC1;A0A1A8UI02;A0A060XII9;A0A060XJX9;A0A087XQU7;A0A146NIL5;A0A146NIU7;A0A146NJR6;A0A146Q523;A0A146Z4H1;A0A146Z4J7;A0A146Z4K2;A0A146Z…	1.2166	0.487952	EAFLASDDKGDSLDSVEALIK		71.06	741.709	2222.11	3	2.41343	138.153
	F1R446;A0A0D9SGF6;A0A0P7V2T7;A0A0P7VEP4;A0A0R4IJ08;A0A0S7GFS2;A0A0S7GFS3;A0A0S7GGW7;A0A0S7GI92;A0A0S7GKU3;A0A1A7WGD9;A0A1A7Z4A6;A0A1A8AIC9;A0A1A8DRB6;A0A1A8GCR2;A0A1A8KF62;A0A1A8MAY9;A0A1A8MXE6;A0A1A8QNY9;A0A1A8RNY5;A0A1A8SFC1;A0A1A8UI02;A0A060XII9;A0A060XJX9;A0A087XQU7;A0A146NIU7;A0A146Q523;A0A146Z4J7;A0A146Z4L3;A0A146Z4P1;A0A146Z6F5;A0A146Z650;C0PUV6;F1R443;F1R445;F8K8N3;G3Q393;G3Q398;H2MBY2;H2…	748.413	24.6248	KIEDLGAAMEEALILDNK		70.83	987.022	1972.03	2	5.20131	152.693
	F1R446;A0A0D9SGF6;A0A0P7V2T7;A0A0P7VEP4;A0A0R4IJ08;A0A0S7GFR3;A0A0S7GFS2;A0A0S7GG64;A0A0S7GKU3;A0A0S7GLM7;A0A1A7WGD9;A0A1A7Z4A6;A0A1A8D2Q6;A0A1A8GCR2;A0A1A8I584;A0A1A8KR84;A0A1A8MAY9;A0A1A8SFC1;A0A060XII9;A0A060XJX9;A0A087XQU7;A0A146NIL5;A0A146NIU7;A0A146NJR6;A0A146Q523;A0A146Z4H1;A0A146Z4J7;A0A146Z4L3;A0A146Z4P1;A0A146Z5L2;A0A146Z6F5;A0A146Z650;F1R443;G3Q393;G3Q398;H2MBY2;H2UIA9;H2UIB0;H2UIB1;H3…	0.646554	0.72502	GKDLIGVQNLLK		69.7	649.397	1296.78	2	-1.08841	96.0961
	F1R446;A0A0P7VEP4;A0A0R4IJ08;A0A060XII9;A0A060XJX9;F1R443;G3Q393;G3Q398;H2UIA9;H2UIB0;H2UIB1;H3C0G3;H3CBT9;I3JZ89;I3JZ90;Q4T9R4;W5KTF3;W5KTG2;W5MFM2;W5MFP4	0.109469	1.64738	LLVSSEDYGR		68.99	569.792	1137.57	2	-0.811243	46.0808
	F1R446;A0A0R4IJ08;A0A0S7GFR3;A0A0S7GFS2;A0A0S7GG64;A0A0S7GKU3;A0A0S7GLM7;A0A1A7WGD9;A0A1A7Z4A6;A0A1A8D2Q6;A0A1A8D8C3;A0A1A8GCR2;A0A1A8I584;A0A1A8KR84;A0A1A8QNY9;A0A1A8SFC1;A0A060XII9;A0A060XJX9;A0A087XQU7;A0A146NIL5;A0A146NIU7;A0A146NJR6;A0A146Q523;A0A146Z4H1;A0A146Z4J7;A0A146Z4K2;A0A146Z4L3;A0A146Z4P1;A0A146Z5L2;A0A146Z6F5;A0A146Z650;F1R443;H2UIA9;H2UIB0;H2UIB1;M4A8R0;W5KTF3;W5KTG2	1.86448	25.3728	EKEPIVGSPDYGKDEDSAEALLK		67.62	830.747	2489.22	3	-0.0692612	82.4828
	F1R446;A0A0D9SGF6;A0A0P7V2T7;A0A0P7VEP4;A0A0R4IJ08;A0A060XII9;A0A060XJX9;F1R443;G3Q393;G3Q398;H2UIA9;H2UIB0;H2UIB1;H3C0G3;H3CBT9;I3JZ89;I3JZ90;Q4T9R4;Q4T9R5;Q13813;W5KTF3;W5KTG2;W5MFM2;W5MFP4	0.996473	0.855391	TATDEAYKDPSNLQGK		67.48	579.948	1736.82	3	2.06475	28.4351
	F1R446;A0A0D9SGF6;A0A0P7VEP4;A0A0R4IJ08;A0A0S7GFR3;A0A0S7GFS1;A0A0S7GFS2;A0A0S7GFS3;A0A0S7GG64;A0A0S7GGW2;A0A0S7GGW7;A0A0S7GKU3;A0A0S7GLM7;A0A0S7GNH5;A0A1A7WGD9;A0A1A7Z4A6;A0A1A8AIC9;A0A1A8DRB6;A0A1A8GCR2;A0A1A8KF62;A0A1A8MAY9;A0A1A8MXE6;A0A1A8QNY9;A0A1A8RNY5;A0A1A8SFC1;A0A1A8UI02;A0A060XII9;A0A060XJX9;A0A087XQU7;A0A146NIL5;A0A146NIU7;A0A146NJR6;A0A146Q523;A0A146Z4H1;A0A146Z4J7;A0A146Z4K2;A0A146Z…	1.68847	1.87492	DLMSWINGIR		67.46	602.812	1203.61	2	-0.298836	155.21
	F1R446;A0A0D9SGF6;A0A0P7V2T7;A0A0P7VEP4;A0A0R4IJ08;A0A0S7GFS1;A0A0S7GFS2;A0A0S7GFS3;A0A0S7GG64;A0A0S7GGW2;A0A0S7GGW7;A0A0S7GI92;A0A0S7GKU3;A0A0S7GLM7;A0A0S7GLW5;A0A1A7WGD9;A0A1A7Z4A6;A0A1A8AIC9;A0A1A8DRB6;A0A1A8GCR2;A0A1A8KF62;A0A1A8MAY9;A0A1A8MXE6;A0A1A8QNY9;A0A1A8RNY5;A0A1A8SFC1;A0A1A8UI02;A0A060XII9;A0A060XJX9;A0A087XQU7;A0A146NIL5;A0A146NIU7;A0A146NJR6;A0A146Q523;A0A146Z4J7;A0A146Z4K2;A0A146Z…	44.1651	0.424204	ASAFNSWFENAEEDLTDPVR		66.91	766.686	2297.04	3	6.9364	164.274
	F1R446;A0A0D9SGF6;A0A0P7V2T7;A0A0P7VEP4;A0A0R4IJ08;A0A0S7GFR3;A0A0S7GFS2;A0A0S7GG64;A0A0S7GKU3;A0A0S7GLM7;A0A1A7WGD9;A0A1A7Z4A6;A0A1A8D2Q6;A0A1A8D8C3;A0A1A8GCR2;A0A1A8I584;A0A1A8KR84;A0A1A8MAY9;A0A1A8QC83;A0A1A8SFC1;A0A060XJX9;A0A087XQU7;A0A146NIL5;A0A146NIU7;A0A146NJR6;A0A146Q523;A0A146Z4H1;A0A146Z4J7;A0A146Z4K2;A0A146Z4L3;A0A146Z4P1;A0A146Z5L2;A0A146Z6F5;A0A146Z650;F1R443;G3Q393;G3Q398;H2MBY2;H…	1.77112	0.00401734	DVEDEETWIR		65.86	646.296	1290.58	2	5.49503	68.6247
	F1R446;A0A0P7VEP4;A0A0R4IJ08;A0A0S7GFS1;A0A0S7GFS2;A0A0S7GFS3;A0A0S7GG64;A0A0S7GGW2;A0A0S7GGW7;A0A0S7GI92;A0A0S7GKU3;A0A0S7GLM7;A0A0S7GLW5;A0A1A7WGD9;A0A1A7Z4A6;A0A1A8AIC9;A0A1A8DRB6;A0A1A8GCR2;A0A1A8KF62;A0A1A8MAY9;A0A1A8MXE6;A0A1A8QNY9;A0A1A8RNY5;A0A1A8SFC1;A0A1A8UI02;A0A060XII9;A0A060XJX9;A0A087XQU7;A0A146NIL5;A0A146NIU7;A0A146NJR6;A0A146Q523;A0A146Z4J7;A0A146Z4K2;A0A146Z4L3;A0A146Z4P1;A0A146Z…	357.792	2.6172	CNSLEEIR	[1] Methylthio (C)	65.69	505.229	1008.44	2	4.26409	42.7674
	F1R446;A0A0D9SGF6;A0A0P7V2T7;A0A0R4IJ08;A0A060XJX9;A0A146Q523;A0A146Z4H1;A0A146Z4J7;A0A146Z4K2;A0A146Z4L3;A0A146Z4P1;A0A146Z5L2;A0A146Z6F5;A0A146Z650;F1QDX2;F1R443;G3Q393;G3Q398;H2MBY2;H3C0G3;H3CBT9;I3JZ89;I3JZ90;Q4T9R4;Q4T9R5;Q13813;W5KTF3;W5KTG2;W5MFM2;W5MFP4	1.01779	0.0478746	VNSLGETAER		65.66	538.272	1074.53	2	-0.776137	20.515
	F1R446;A0A0D9SGF6;A0A0P7V2T7;A0A0P7VEP4;A0A0R4IJ08;A0A0S7GKQ9;A0A0S7GMT1;A0A0S7GRJ6;A0A1A7WGD9;A0A1A7Z4A6;A0A1A8D2Q6;A0A1A8D8C3;A0A1A8GCR2;A0A1A8I584;A0A1A8KR84;A0A1A8MAY9;A0A1A8QC83;A0A1A8SFC1;A0A1A8UI02;A0A060XII9;A0A060XJX9;A0A087XQU7;A0A146Q523;A0A146Z4H1;A0A146Z4K2;A0A146Z4L3;A0A146Z4P1;A0A146Z5L2;A0A146Z6F5;A0A146Z650;F1R443;G3Q393;G3Q398;H2MBY2;H2UIA9;H2UIB0;H2UIB1;H3C0G3;H3CBT9;I3JZ89;I3J…	0.821047	1.11662	ITALDEFATK		65	554.791	1107.57	2	-11.0637	72.3097
	F1R446;A0A0P7VEP4;A0A0R4IJ08;A0A0S7GFQ2;A0A0S7GFQ8;A0A0S7GFR3;A0A0S7GFS1;A0A0S7GFS2;A0A0S7GFS3;A0A0S7GG64;A0A0S7GGW2;A0A0S7GGW7;A0A0S7GI92;A0A0S7GKU3;A0A0S7GLM7;A0A0S7GLW5;A0A0S7GNH5;A0A1A7WGD9;A0A1A7Z4A6;A0A1A8AIC9;A0A1A8DRB6;A0A1A8GCR2;A0A1A8KF62;A0A1A8MAY9;A0A1A8MXE6;A0A1A8QNY9;A0A1A8RNY5;A0A1A8SFC1;A0A1A8UI02;A0A060XII9;A0A060XJX9;A0A087XQU7;A0A146NIL5;A0A146NIU7;A0A146NJR6;A0A146Q523;A0A146Z…	1.55949	1.01947	DLDDEESWIKEK		64.98	502.906	1505.7	3	3.79862	67.8497
	F1R446;A0A0D9SGF6;A0A0P7V2T7;A0A0P7VEP4;A0A0R4IJ08;A0A0S7GFS2;A0A0S7GFS3;A0A0S7GGW7;A0A0S7GI92;A0A0S7GKU3;A0A1A7WGD9;A0A1A7Z4A6;A0A1A8AIC9;A0A1A8DRB6;A0A1A8GCR2;A0A1A8KF62;A0A1A8MAY9;A0A1A8MXE6;A0A1A8QNY9;A0A1A8RNY5;A0A1A8SFC1;A0A1A8UI02;A0A060XII9;A0A060XJX9;A0A087XQU7;A0A146NIU7;A0A146Q523;A0A146Z4J7;A0A146Z4L3;A0A146Z4P1;A0A146Z6F5;A0A146Z650;C0PUV6;F1R443;F1R445;F8K8N3;G3Q393;G3Q398;H2MBY2;H2…	0.00150252	0.0161301	MQHNLEQQIQAR		63.72	499.254	1494.74	3	-0.210263	31.0477
	F1R446;A0A0P7VEP4;A0A0R4IJ08;A0A0S7GFR3;A0A0S7GFS1;A0A0S7GFS2;A0A0S7GFS3;A0A0S7GG64;A0A0S7GGW2;A0A0S7GGW7;A0A0S7GKU3;A0A0S7GLM7;A0A0S7GNH5;A0A1A7WGD9;A0A1A7Z4A6;A0A1A8AIC9;A0A1A8DRB6;A0A1A8GCR2;A0A1A8KF62;A0A1A8MAY9;A0A1A8MXE6;A0A1A8QNY9;A0A1A8RNY5;A0A1A8SFC1;A0A1A8UI02;A0A060XII9;A0A060XJX9;A0A087XQU7;A0A146NIL5;A0A146NIU7;A0A146NJR6;A0A146Q523;A0A146Z4H1;A0A146Z4J7;A0A146Z4K2;A0A146Z4L3;A0A146Z…	1.51961	32.2562	LIQSHPEAVDDIQEK		63.33	574.629	1720.86	3	2.61635	42.2722
	F1R446;A0A0P7V2T7;A0A0P7VEP4;A0A0R4IJ08;A0A0S7GKE8;A0A0S7GMT1;A0A0S7GQA6;A0A1A7WGD9;A0A1A7Z4A6;A0A1A8D2Q6;A0A1A8D8C3;A0A1A8GCR2;A0A1A8I584;A0A1A8KR84;A0A1A8MAY9;A0A1A8QC83;A0A1A8SFC1;A0A1A8UI02;A0A060XII9;A0A060XJX9;A0A087XQU7;A0A146Q523;A0A146Z4H1;A0A146Z4K2;A0A146Z4L3;A0A146Z4P1;A0A146Z5L2;A0A146Z6F5;A0A146Z650;F1R443;G3Q393;G3Q398;H2MBY2;I3JZ89;I3JZ90;M4A8R0;Q566W8;W5KTF3;W5KTG2;W5MFM2;W5MFP4	4.7557	1.01947	ALINADELANDVAGAEALLDR		63.3	1077.56	2153.1	2	2.01469	185.541
	F1R446;A0A0D9SGF6;A0A0P7VEP4;A0A0R4IJ08;A0A0S7GFR3;A0A0S7GFS2;A0A0S7GG64;A0A0S7GKU3;A0A0S7GLM7;A0A1A7WGD9;A0A1A7Z4A6;A0A1A8D2Q6;A0A1A8D8C3;A0A1A8GCR2;A0A1A8I584;A0A1A8KR84;A0A1A8MAY9;A0A1A8QC83;A0A1A8SFC1;A0A1A8UI02;A0A060XII9;A0A060XJX9;A0A087XQU7;A0A146NJR6;A0A146Q523;A0A146Z4H1;A0A146Z4J7;A0A146Z4K2;A0A146Z4L3;A0A146Z4P1;A0A146Z5L2;A0A146Z6F5;A0A146Z650;F1R443;G3Q393;G3Q398;H2MBY2;H2UIA9;H2UIB…	0.908829	0.475904	HALLEADVAAHQDR		62.69	515.936	1544.79	3	10.1322	40.423
	F1R446;A0A0R4IJ08;A0A0S7GFQ8;A0A0S7GFR3;A0A0S7GFS1;A0A0S7GFS2;A0A0S7GFS3;A0A0S7GFT9;A0A0S7GG64;A0A0S7GGW2;A0A0S7GGW7;A0A0S7GKU3;A0A0S7GLM7;A0A0S7GNH5;A0A1A7WGD9;A0A1A7Z4A6;A0A1A8AIC9;A0A1A8DRB6;A0A1A8GCR2;A0A1A8KF62;A0A1A8MAY9;A0A1A8MXE6;A0A1A8QNY9;A0A1A8RNY5;A0A1A8SFC1;A0A1A8UI02;A0A060XII9;A0A060XJX9;A0A087XQU7;A0A146NIL5;A0A146NIU7;A0A146NJR6;A0A146Q523;A0A146Z4H1;A0A146Z4J7;A0A146Z4K2;A0A146Z…	1.64574	1.01947	EAFLASDDKGDSLDSVEALIK		62.33	1112.06	2222.1	2	1.50482	138.153
	F1R446;A0A0D9SGF6;A0A0P7VEP4;A0A0R4IJ08;A0A0S7GFQ2;A0A0S7GFQ8;A0A0S7GFR3;A0A0S7GFS1;A0A0S7GFS2;A0A0S7GFS3;A0A0S7GG64;A0A0S7GGW2;A0A0S7GGW7;A0A0S7GI92;A0A0S7GKU3;A0A0S7GLM7;A0A0S7GLW5;A0A0S7GNH5;A0A1A7WGD9;A0A1A7Z4A6;A0A1A8AIC9;A0A1A8DRB6;A0A1A8GCR2;A0A1A8KF62;A0A1A8MAY9;A0A1A8MXE6;A0A1A8QNY9;A0A1A8RNY5;A0A1A8SFC1;A0A1A8UI02;A0A060XII9;A0A060XJX9;A0A087XQU7;A0A146NIL5;A0A146NIU7;A0A146NJR6;A0A146Q…	4.71858	1.01947	LEESLEYQQFVANVEEEEAWINEK		62.07	976.131	2925.37	3	4.07214	165.566
	F1R446;A0A0P7VEP4;A0A0R4IJ08;A0A0S7GKQ9;A0A0S7GMT1;A0A0S7GRJ6;A0A1A7WGD9;A0A1A7Z4A6;A0A1A8D2Q6;A0A1A8D8C3;A0A1A8GCR2;A0A1A8I584;A0A1A8KR84;A0A1A8MAY9;A0A1A8QC83;A0A1A8SFC1;A0A1A8UI02;A0A060XII9;A0A087XQU7;A0A146Q523;A0A146Z4H1;A0A146Z4K2;A0A146Z4L3;A0A146Z4P1;A0A146Z5L2;A0A146Z6F5;A0A146Z650;F1R443;G3Q393;G3Q398;H2UIA9;H2UIB0;H2UIB1;H3C0G3;H3CBT9;I3JZ89;I3JZ90;M4A8R0;Q4T9R4;Q4T9R5;W5KTF3;W5KTG2;W…	0.396837	0.831982	AALEDSFHLQQFFR		60.37	570.291	1707.85	3	6.80052	138.511
	F1R446;A0A0P7VEP4;A0A0R4IJ08;A0A0S7GFQ2;A0A0S7GFQ8;A0A0S7GFR3;A0A0S7GFS1;A0A0S7GFS2;A0A0S7GFS3;A0A0S7GG64;A0A0S7GGW2;A0A0S7GGW7;A0A0S7GI92;A0A0S7GKU3;A0A0S7GLM7;A0A0S7GLW5;A0A0S7GNH5;A0A1A7WGD9;A0A1A7Z4A6;A0A1A8AIC9;A0A1A8DRB6;A0A1A8GCR2;A0A1A8KF62;A0A1A8MAY9;A0A1A8MXE6;A0A1A8QNY9;A0A1A8RNY5;A0A1A8SFC1;A0A1A8UI02;A0A060XII9;A0A060XJX9;A0A087XQU7;A0A146NIL5;A0A146NIU7;A0A146NJR6;A0A146Q523;A0A146Z…	7.88007	0.0992557	DLDDEESWIK		60.1	625.285	1248.56	2	4.38244	78.0972
	F1R446;A0A0D9SGF6;A0A0P7V2T7;A0A0P7VEP4;A0A0R4IJ08;A0A0S7GFQ2;A0A0S7GFQ8;A0A0S7GFR3;A0A0S7GFS1;A0A0S7GFS2;A0A0S7GFS3;A0A0S7GG64;A0A0S7GGW2;A0A0S7GGW7;A0A0S7GI92;A0A0S7GKU3;A0A0S7GLM7;A0A0S7GLW5;A0A0S7GNH5;A0A1A7WGD9;A0A1A7Z4A6;A0A1A8AIC9;A0A1A8DRB6;A0A1A8GCR2;A0A1A8KF62;A0A1A8MAY9;A0A1A8MXE6;A0A1A8QNY9;A0A1A8RNY5;A0A1A8SFC1;A0A1A8UI02;A0A060XII9;A0A060XJX9;A0A087XQU7;A0A146NIL5;A0A146NIU7;A0A146N…	0.128867	41.2466	HQAFEAELHANADR		59.07	536.923	1607.75	3	3.95866	36.1187
	F1R446;A0A0R4IJ08;A0A0S7GFR3;A0A0S7GFS1;A0A0S7GFS2;A0A0S7GFS3;A0A0S7GG64;A0A0S7GGW2;A0A0S7GGW7;A0A0S7GKU3;A0A0S7GLM7;A0A0S7GNH5;A0A1A7WGD9;A0A1A7Z4A6;A0A1A8AIC9;A0A1A8DRB6;A0A1A8GCR2;A0A1A8MAY9;A0A1A8MXE6;A0A1A8QNY9;A0A1A8RNY5;A0A1A8SFC1;A0A1A8UI02;A0A060XII9;A0A060XJX9;A0A087XQU7;A0A146NIL5;A0A146NIU7;A0A146NJR6;A0A146Q523;A0A146Z4H1;A0A146Z4J7;A0A146Z4K2;A0A146Z4L3;A0A146Z4P1;A0A146Z5L2;A0A146Z…	1.11941	0.935289	SNMLGSAHEVQR		58.43	443.55	1327.63	3	-0.271899	27.1652
	F1R446;A0A0D9SGF6;A0A0P7VEP4;A0A0R4IJ08;A0A0S7GKE8;A0A0S7GMT1;A0A0S7GQA6;A0A1A7WGD9;A0A1A7Z4A6;A0A1A8D2Q6;A0A1A8D8C3;A0A1A8GCR2;A0A1A8I584;A0A1A8KR84;A0A1A8MAY9;A0A1A8QC83;A0A1A8SFC1;A0A1A8UI02;A0A060XII9;A0A060XJX9;A0A087XQU7;A0A146Q523;A0A146Z4H1;A0A146Z4K2;A0A146Z4L3;A0A146Z4P1;A0A146Z5L2;A0A146Z6F5;F1R443;G3Q393;G3Q398;H2MBY2;H2UIA9;H2UIB0;H2UIB1;H3C0G3;H3CBT9;M4A8R0;Q4T9R4;Q566W8;Q13813;W5KT…	9.5342	1.23316	EQLMASDDFGR		57.64	634.784	1267.55	2	1.9613	56.4104
	F1R446;A0A0D9SGF6;A0A0P7VEP4;A0A0R4IJ08;A0A0S7GKE8;A0A0S7GMT1;A0A0S7GQA6;A0A1A7WGD9;A0A1A7Z4A6;A0A1A8D2Q6;A0A1A8D8C3;A0A1A8GCR2;A0A1A8I584;A0A1A8KR84;A0A1A8MAY9;A0A1A8QC83;A0A1A8SFC1;A0A1A8UI02;A0A060XII9;A0A060XJX9;A0A087XQU7;A0A146Q523;A0A146Z4H1;A0A146Z4K2;A0A146Z4L3;A0A146Z4P1;A0A146Z5L2;A0A146Z6F5;F1R443;G3Q393;G3Q398;H2MBY2;H2UIA9;H2UIB0;H2UIB1;H3C0G3;H3CBT9;M4A8R0;Q4T9R4;Q566W8;Q13813;W5KT…	0.0416343	6.13441	EKEQLMASDDFGRDLASVQALLR		57.25	648.836	2591.31	4	5.12752	164.992
	F1R446;A0A0P7VEP4;A0A0R4IJ08;A0A0S7GKQ9;A0A0S7GMT1;A0A0S7GRJ6;A0A1A7WGD9;A0A1A7Z4A6;A0A1A8D2Q6;A0A1A8D8C3;A0A1A8GCR2;A0A1A8I584;A0A1A8KR84;A0A1A8MAY9;A0A1A8QC83;A0A1A8SFC1;A0A1A8UI02;A0A060XII9;A0A087XQU7;A0A146Q523;A0A146Z4H1;A0A146Z4K2;A0A146Z4L3;A0A146Z4P1;A0A146Z5L2;A0A146Z6F5;A0A146Z650;F1R443;G3Q393;G3Q398;H2UIA9;H2UIB0;H2UIB1;H3C0G3;H3CBT9;I3JZ89;I3JZ90;M4A8R0;Q4T9R4;Q4T9R5;W5KTF3;W5KTG2;W…	1.03818	313.195	RAALEDSFHLQQFFR		57.22	466.997	1863.96	4	9.12968	123.824
	F1R446;A0A0D9SGF6;A0A0P7V2T7;A0A0P7VEP4;A0A0R4IJ08;A0A0S7GFQ8;A0A0S7GFR3;A0A0S7GFS1;A0A0S7GFS2;A0A0S7GFS3;A0A0S7GFT9;A0A0S7GG64;A0A0S7GGW2;A0A0S7GGW7;A0A0S7GKU3;A0A0S7GLM7;A0A0S7GNH5;A0A1A7WGD9;A0A1A7Z4A6;A0A1A8AIC9;A0A1A8DRB6;A0A1A8GCR2;A0A1A8KF62;A0A1A8MAY9;A0A1A8MXE6;A0A1A8QNY9;A0A1A8RNY5;A0A1A8SFC1;A0A1A8UI02;A0A060XII9;A0A060XJX9;A0A087XQU7;A0A146NIL5;A0A146NIU7;A0A146NJR6;A0A146Q523;A0A146Z…	176.124	1.01947	SKLGESQTLQQFSR		57.05	804.917	1607.82	2	-6.37406	53.0722
	F1R446;A0A0D9SGF6;A0A0P7V2T7;A0A0P7VEP4;A0A0R4IJ08;A0A0S7GKE8;A0A0S7GMT1;A0A0S7GQA6;A0A1A7WGD9;A0A1A7Z4A6;A0A1A8D2Q6;A0A1A8D8C3;A0A1A8GCR2;A0A1A8I584;A0A1A8KR84;A0A1A8MAY9;A0A1A8QC83;A0A1A8SFC1;A0A1A8UI02;A0A060XII9;A0A060XJX9;A0A087XQU7;A0A146Q523;A0A146Z4H1;A0A146Z4K2;A0A146Z4L3;A0A146Z4P1;A0A146Z5L2;A0A146Z6F5;F1R443;H2UIA9;H2UIB0;H2UIB1;I3JZ89;I3JZ90;M4A8R0;Q4T9R4;Q4T9R5;Q566W8;Q13813;W5KTF3;…	1.06504	1.20015	FNRDVDETISWIK		56.12	541.613	1621.82	3	3.67186	98.3523
	F1R446;A0A0D9SGF6;A0A0P7V2T7;A0A0R4IJ08;A0A0S7GFR3;A0A0S7GFS1;A0A0S7GFS2;A0A0S7GFS3;A0A0S7GG64;A0A0S7GGW2;A0A0S7GGW7;A0A0S7GKU3;A0A0S7GLM7;A0A0S7GNH5;A0A1A7WGD9;A0A1A7Z4A6;A0A1A8AIC9;A0A1A8DRB6;A0A1A8GCR2;A0A1A8MAY9;A0A1A8MXE6;A0A1A8QNY9;A0A1A8RNY5;A0A1A8SFC1;A0A1A8UI02;A0A060XII9;A0A060XJX9;A0A087XQU7;A0A146NIL5;A0A146NIU7;A0A146NJR6;A0A146Q523;A0A146Z4H1;A0A146Z4J7;A0A146Z4K2;A0A146Z4L3;A0A146Z…	377.696	18.7436	DADETKEWIEEK		55.6	498.234	1491.68	3	7.33982	44.8114
	F1R446;A0A0R4IJ08;A0A060XII9;A0A087XQU7;F1R443;F1R445;M4A8R0;Q56A42	0.898077	1.15362	LLEAQDHFR		53.96	376.865	1127.57	3	3.64901	40.0654
	F1R446;A0A0D9SGF6;A0A0P7VEP4;A0A0R4IJ08;A0A0S7GKE8;A0A0S7GMT1;A0A0S7GQA6;A0A1A7WGD9;A0A1A7Z4A6;A0A1A8D2Q6;A0A1A8D8C3;A0A1A8GCR2;A0A1A8I584;A0A1A8KR84;A0A1A8MAY9;A0A1A8QC83;A0A1A8SFC1;A0A1A8UI02;A0A060XII9;A0A060XJX9;A0A087XQU7;A0A146Q523;A0A146Z4H1;A0A146Z4K2;A0A146Z4L3;A0A146Z4P1;A0A146Z5L2;A0A146Z6F5;F1R443;G3Q393;G3Q398;H2MBY2;H2UIA9;H2UIB0;H2UIB1;H3C0G3;H3CBT9;M4A8R0;Q4T9R4;Q566W8;Q13813;W5KT…	0.13822	0.0380785	EQLMASDDFGRDLASVQALLR		53.67	779.066	2334.18	3	7.43772	168.006
	F1R446;A0A0P7VEP4;A0A0R4IJ08;A0A0S7GFR3;A0A0S7GFS1;A0A0S7GFS2;A0A0S7GFS3;A0A0S7GG64;A0A0S7GGW2;A0A0S7GGW7;A0A0S7GKU3;A0A0S7GLM7;A0A0S7GNH5;A0A1A7WGD9;A0A1A7Z4A6;A0A1A8AIC9;A0A1A8DRB6;A0A1A8GCR2;A0A1A8KF62;A0A1A8MAY9;A0A1A8MXE6;A0A1A8QNY9;A0A1A8RNY5;A0A1A8SFC1;A0A1A8UI02;A0A060XII9;A0A060XJX9;A0A087XQU7;A0A146NIL5;A0A146NIU7;A0A146NJR6;A0A146Q523;A0A146Z4H1;A0A146Z4J7;A0A146Z4K2;A0A146Z4L3;A0A146Z…	7.67321	210.65	LIQSHPEAVDDIQEK		52.66	861.44	1720.86	2	2.68113	42.2016
	F1R446;A0A0D9SGF6;A0A0P7V2T7;A0A0P7VEP4;A0A0R4IJ08;A0A0S7GFR3;A0A0S7GFS2;A0A0S7GG64;A0A0S7GKU3;A0A0S7GLM7;A0A1A7WGD9;A0A1A7Z4A6;A0A1A8D2Q6;A0A1A8D8C3;A0A1A8GCR2;A0A1A8I584;A0A1A8KR84;A0A1A8MAY9;A0A1A8QC83;A0A1A8SFC1;A0A1A8UI02;A0A060XII9;A0A060XJX9;A0A087XQU7;A0A146NJR6;A0A146Q523;A0A146Z4H1;A0A146Z4J7;A0A146Z4K2;A0A146Z4L3;A0A146Z4P1;A0A146Z5L2;A0A146Z6F5;A0A146Z650;F1R443;G3Q393;G3Q398;H2MBY2;H…	1.0417	0.0543832	LREANQQQQFNR		52.37	511.262	1530.76	3	-4.27043	20.2292
	F1R446;A0A0D9SGF6;A0A0P7V2T7;A0A0P7VEP4;A0A0R4IJ08;A0A0S7GKE8;A0A0S7GMT1;A0A0S7GQA6;A0A1A7WGD9;A0A1A7Z4A6;A0A1A8D2Q6;A0A1A8D8C3;A0A1A8GCR2;A0A1A8I584;A0A1A8KR84;A0A1A8MAY9;A0A1A8QC83;A0A1A8SFC1;A0A1A8UI02;A0A060XII9;A0A060XJX9;A0A087XQU7;A0A146Q523;A0A146Z4H1;A0A146Z4K2;A0A146Z4L3;A0A146Z4P1;A0A146Z5L2;A0A146Z6F5;F1R443;G3Q393;G3Q398;H2UIA9;H2UIB0;H2UIB1;H3C0G3;H3CBT9;I3JZ89;I3JZ90;M4A8R0;Q4T9R4;…	0.0367097	0.749109	DVDETISWIK		51.1	603.309	1204.6	2	2.06903	95.814
	F1R446;A0A0D9SGF6;A0A0P7VEP4;A0A0R4IJ08;A0A0S7GFR3;A0A0S7GFS2;A0A0S7GG64;A0A0S7GKU3;A0A0S7GLM7;A0A1A7WGD9;A0A1A7Z4A6;A0A1A8D2Q6;A0A1A8D8C3;A0A1A8GCR2;A0A1A8I584;A0A1A8KR84;A0A1A8MAY9;A0A1A8QC83;A0A1A8SFC1;A0A1A8UI02;A0A060XII9;A0A060XJX9;A0A087XQU7;A0A146NJR6;A0A146Q523;A0A146Z4H1;A0A146Z4J7;A0A146Z4K2;A0A146Z4L3;A0A146Z4P1;A0A146Z5L2;A0A146Z6F5;A0A146Z650;F1R443;G3Q393;G3Q398;H2UIA9;H2UIB0;H2UIB…	1.30642	0.821557	LLEATELK		50.6	458.772	915.529	2	-0.816887	51.8015
	F1R446;A0A0P7VEP4;A0A0R4IJ08;A0A060XII9;A0A060XJX9;F1R443;G3Q393;G3Q398;H2UIA9;H2UIB0;H2UIB1;H3C0G3;H3CBT9;I3JZ89;I3JZ90;Q4T9R4;W5KTF3;W5KTG2;W5MFM2;W5MFP4	0.837064	1.10897	LLVSSEDYGRDLTGVQNLR		48.03	712.376	2134.11	3	2.65968	98.3523
	F1R446;A0A0D9SGF6;A0A0P7V2T7;A0A0P7VEP4;A0A0R4IJ08;A0A0S7GFQ2;A0A0S7GFQ8;A0A0S7GFR3;A0A0S7GFS1;A0A0S7GFS2;A0A0S7GFS3;A0A0S7GG64;A0A0S7GGW2;A0A0S7GGW7;A0A0S7GI92;A0A0S7GKU3;A0A0S7GLM7;A0A0S7GLW5;A0A0S7GNH5;A0A1A7WGD9;A0A1A7Z4A6;A0A1A8AIC9;A0A1A8DRB6;A0A1A8GCR2;A0A1A8KF62;A0A1A8MAY9;A0A1A8MXE6;A0A1A8QNY9;A0A1A8RNY5;A0A1A8SFC1;A0A1A8UI02;A0A060XII9;A0A060XJX9;A0A087XQU7;A0A146NIL5;A0A146NIU7;A0A146N…	0.953975	0.827656	DLTGVQNLR		47.62	508.28	1014.55	2	-4.07736	50.4624
	F1R446;A0A0D9SGF6;A0A0P7V2T7;A0A0P7VEP4;A0A0R4IJ08;A0A0S7GFQ8;A0A0S7GFR3;A0A0S7GFS1;A0A0S7GFS2;A0A0S7GFS3;A0A0S7GFT9;A0A0S7GG64;A0A0S7GGW2;A0A0S7GGW7;A0A0S7GKU3;A0A0S7GLM7;A0A0S7GNH5;A0A1A7WGD9;A0A1A7Z4A6;A0A1A8AIC9;A0A1A8DRB6;A0A1A8GCR2;A0A1A8KF62;A0A1A8MAY9;A0A1A8MXE6;A0A1A8QNY9;A0A1A8RNY5;A0A1A8SFC1;A0A1A8UI02;A0A060XII9;A0A060XJX9;A0A087XQU7;A0A146NIL5;A0A146NIU7;A0A146NJR6;A0A146Q523;A0A146Z…	11.0449	93.973	SKLGESQTLQQFSR		46.81	536.945	1607.81	3	-10.3331	53.0722
	F1R446;A0A0R4IJ08;A0A0S7GKE8;A0A0S7GKV9;A0A0S7GMT1;A0A0S7GPJ4;A0A0S7GQA6;A0A0S7GRJ6;A0A1A7WGD9;A0A1A7Z4A6;A0A1A8D2Q6;A0A1A8D8C3;A0A1A8GCR2;A0A1A8I584;A0A1A8KR84;A0A1A8MAY9;A0A1A8QC83;A0A1A8SFC1;A0A1A8UI02;A0A060XII9;A0A087XQU7;A0A146Q523;A0A146Z4H1;A0A146Z4K2;A0A146Z4L3;A0A146Z4P1;A0A146Z5L2;A0A146Z6F5;F1R443;H2MBY2;H2UIA9;H2UIB0;H2UIB1;H3C0G3;H3CBT9;M4A8R0;Q4T9R4;Q4T9R5;Q566W8;W5KTF3;W5KTG2;W5MF…	1.85005	1.01947	LWDLLLQK		39.08	514.813	1027.61	2	0.50593	123.824
	F1R446;A0A0D9SGF6;A0A0P7V2T7;A0A0P7VEP4;A0A0R4IJ08;A0A0S7GFS1;A0A0S7GFS2;A0A0S7GFS3;A0A0S7GG64;A0A0S7GGW2;A0A0S7GGW7;A0A0S7GI92;A0A0S7GKU3;A0A0S7GLM7;A0A0S7GLW5;A0A060XII9;A0A087XQU7;A0A146NIL5;A0A146NIU7;A0A146NJR6;A0A146Q523;A0A146Z4J7;A0A146Z4K2;A0A146Z4L3;A0A146Z4P1;A0A146Z6F5;A0A146Z650;C0PUV6;F1R443;G3Q393;G3Q398;H2MBY2;H2UGD2;H2UIA9;H2UIB0;H2UIB1;H3C0G3;H3CBT9;I3JZ89;I3JZ90;M4A8R0;Q4T9R4;Q…	1.20725	0.827429	ENSLKTDDYGR		38.31	433.213	1296.62	3	19.998	19.9438
	F1R446;A0A0D9SGF6;A0A0P7V2T7;A0A0P7VEP4;A0A0R4IJ08;A0A0S7GFQ8;A0A0S7GFR3;A0A0S7GFS1;A0A0S7GFS2;A0A0S7GFS3;A0A0S7GFT9;A0A0S7GG64;A0A0S7GGW2;A0A0S7GGW7;A0A0S7GKU3;A0A0S7GLM7;A0A0S7GNH5;A0A1A7WGD9;A0A1A7Z4A6;A0A1A8AIC9;A0A1A8DRB6;A0A1A8GCR2;A0A1A8KF62;A0A1A8MAY9;A0A1A8MXE6;A0A1A8QNY9;A0A1A8RNY5;A0A1A8SFC1;A0A1A8UI02;A0A060XII9;A0A060XJX9;A0A087XQU7;A0A146NIL5;A0A146NIU7;A0A146NJR6;A0A146Q523;A0A146Z…	1.03591	0.81451	LGESQTLQQFSR		37.01	465.242	1392.7	3	2.45396	58.6754
	F1R446;A0A0D9SGF6;A0A0P7VEP4;A0A0R4IJ08;A0A0S7GFS1;A0A0S7GFS2;A0A0S7GFS3;A0A0S7GG64;A0A0S7GGW2;A0A0S7GGW7;A0A0S7GI92;A0A0S7GKU3;A0A0S7GLM7;A0A0S7GLW5;A0A1A7WGD9;A0A1A7Z4A6;A0A1A8AIC9;A0A1A8DRB6;A0A1A8GCR2;A0A1A8KF62;A0A1A8MAY9;A0A1A8MXE6;A0A1A8QNY9;A0A1A8RNY5;A0A1A8SFC1;A0A1A8UI02;A0A060XII9;A0A060XJX9;A0A087XQU7;A0A146NIL5;A0A146NIU7;A0A146NJR6;A0A146Q523;A0A146Z4J7;A0A146Z4K2;A0A146Z4L3;A0A146Z…	1.53291	0.988724	KVEDLFLTFAK		36.93	655.857	1309.7	2	-23.1591	119.386
	F1R446;A0A0D9SGF6;A0A0P7V2T7;A0A0P7VEP4;A0A0R4IJ08;A0A0S7GFR3;A0A0S7GFS2;A0A0S7GG64;A0A0S7GKU3;A0A0S7GLM7;A0A1A7WGD9;A0A1A7Z4A6;A0A1A8D2Q6;A0A1A8GCR2;A0A1A8I584;A0A1A8KR84;A0A1A8MAY9;A0A1A8SFC1;A0A060XII9;A0A060XJX9;A0A087XQU7;A0A146NIL5;A0A146NIU7;A0A146NJR6;A0A146Q523;A0A146Z4H1;A0A146Z4J7;A0A146Z4L3;A0A146Z4P1;A0A146Z5L2;A0A146Z6F5;A0A146Z650;F1R443;G3Q393;G3Q398;H2MBY2;H2UIA9;H2UIB0;H2UIB1;H3…	1.12398	1.23248	GKDLIGVQNLLKK		36.53	357.226	1424.87	4	2.74437	80.7888
	F1R446;A0A0D9SGF6;A0A0P7V2T7;A0A0P7VEP4;A0A0R4IJ08;A0A0S7GFQ8;A0A0S7GFR3;A0A0S7GFS1;A0A0S7GFS2;A0A0S7GFS3;A0A0S7GFT9;A0A0S7GG64;A0A0S7GGW2;A0A0S7GGW7;A0A0S7GKU3;A0A0S7GLM7;A0A0S7GNH5;A0A1A7WGD9;A0A1A7Z4A6;A0A1A8AIC9;A0A1A8DRB6;A0A1A8GCR2;A0A1A8KF62;A0A1A8MAY9;A0A1A8MXE6;A0A1A8QNY9;A0A1A8RNY5;A0A1A8SFC1;A0A1A8UI02;A0A060XII9;A0A060XJX9;A0A087XQU7;A0A146NIL5;A0A146NIU7;A0A146NJR6;A0A146Q523;A0A146Z…	1.03818	173.829	KHEDFDKAINVQEEK		32.61	458.234	1828.91	4	4.44861	30.8362
A0A0R4IJ08	82	1.51893	1.01947	82
	A0A0R4IJ08;A0A0D9SGF6;A0A0S7GFR3;A0A0S7GFS1;A0A0S7GFS2;A0A0S7GFS3;A0A0S7GG64;A0A0S7GGW2;A0A0S7GGW7;A0A0S7GKU3;A0A0S7GLM7;A0A0S7GNH5;A0A1A7WGD9;A0A1A7Z4A6;A0A1A8GCR2;A0A1A8MAY9;A0A1A8MXE6;A0A1A8QNY9;A0A1A8RNY5;A0A1A8SFC1;A0A060XII9;A0A060XJX9;A0A087XQU7;A0A146NIL5;A0A146NIU7;A0A146NJR6;A0A146Q523;A0A146Z4H1;A0A146Z4J7;A0A146Z4K2;A0A146Z4L3;A0A146Z4P1;A0A146Z5L2;A0A146Z6F5;A0A146Z650;F1QDX2;F1R443;…	1.10634	0.946459	NQALNTDNYGHDLASVQALQR		127.8	776.717	2327.13	3	-0.924291	82.1301
	A0A0R4IJ08;A0A0S7GFS1;A0A0S7GFS2;A0A0S7GFS3;A0A0S7GG64;A0A0S7GGW2;A0A0S7GGW7;A0A0S7GI92;A0A0S7GKU3;A0A0S7GLM7;A0A0S7GLW5;A0A1A7WGD9;A0A1A7Z4A6;A0A1A8AIC9;A0A1A8DRB6;A0A1A8GCR2;A0A1A8KF62;A0A1A8MAY9;A0A1A8MXE6;A0A1A8QNY9;A0A1A8RNY5;A0A1A8SFC1;A0A1A8UI02;A0A060XII9;A0A060XJX9;A0A087XQU7;A0A146NIL5;A0A146NIU7;A0A146NJR6;A0A146Q523;A0A146Z4J7;A0A146Z4K2;A0A146Z4L3;A0A146Z4P1;A0A146Z6F5;A0A146Z650;F1R…	1.12788	1556.08	LNLVGSEDYGDTLAAVQGLLK		115.77	726.054	2175.14	3	0.603017	171.724
	A0A0R4IJ08;A0A0S7GFS1;A0A0S7GFS2;A0A0S7GFS3;A0A0S7GG64;A0A0S7GGW2;A0A0S7GGW7;A0A0S7GI92;A0A0S7GKU3;A0A0S7GLM7;A0A0S7GLW5;A0A1A7WGD9;A0A1A7Z4A6;A0A1A8AIC9;A0A1A8DRB6;A0A1A8GCR2;A0A1A8KF62;A0A1A8MAY9;A0A1A8MXE6;A0A1A8QNY9;A0A1A8RNY5;A0A1A8SFC1;A0A1A8UI02;A0A060XII9;A0A060XJX9;A0A087XQU7;A0A146NIL5;A0A146NIU7;A0A146NJR6;A0A146Q523;A0A146Z4J7;A0A146Z4K2;A0A146Z4L3;A0A146Z4P1;A0A146Z6F5;A0A146Z650;F1R…	16.1158	1.01947	LNLVGSEDYGDTLAAVQGLLK		109.97	1088.58	2175.15	2	6.71343	175.929
	A0A0R4IJ08;A0A0D9SGF6;A0A0P7V2T7;A0A0P7VEP4;A0A0S7GFS1;A0A0S7GFS2;A0A0S7GFS3;A0A0S7GG64;A0A0S7GGW2;A0A0S7GGW7;A0A0S7GI92;A0A0S7GKU3;A0A0S7GLM7;A0A0S7GLW5;A0A1A7WGD9;A0A1A7Z4A6;A0A1A8AIC9;A0A1A8DRB6;A0A1A8GCR2;A0A1A8KF62;A0A1A8MAY9;A0A1A8MXE6;A0A1A8QNY9;A0A1A8RNY5;A0A1A8SFC1;A0A1A8UI02;A0A1B0GV13;A0A060XII9;A0A060XJX9;A0A087XQU7;A0A146NIL5;A0A146NIU7;A0A146NJR6;A0A146Q523;A0A146Z4J7;A0A146Z4K2;A0A…	1.62303	0.582025	LDENSAFLQFNWK		109.63	806.398	1610.78	2	7.24726	133.8
	A0A0R4IJ08;A0A060XII9;A0A060XJX9;F1QDX2;F1R443;F1R446;H2UIB1;H3CBT9;I3JZ89;I3JZ90;Q4T9R4;Q4T9R5	1.59564	1.6447	LAVQTTANFNTIK		107.46	710.894	1419.77	2	3.10611	73.2969
	A0A0R4IJ08;A0A0P7V2T7;A0A0P7VEP4;A0A0S7GKE8;A0A0S7GMT1;A0A0S7GQA6;A0A1A7WGD9;A0A1A7Z4A6;A0A1A8D2Q6;A0A1A8D8C3;A0A1A8GCR2;A0A1A8I584;A0A1A8KR84;A0A1A8MAY9;A0A1A8QC83;A0A1A8SFC1;A0A1A8UI02;A0A060XII9;A0A060XJX9;A0A087XQU7;A0A146Q523;A0A146Z4H1;A0A146Z4K2;A0A146Z4L3;A0A146Z4P1;A0A146Z5L2;A0A146Z6F5;A0A146Z650;F1R443;F1R446;G3Q393;G3Q398;H2MBY2;I3JZ89;I3JZ90;M4A8R0;Q566W8;W5KTF3;W5KTG2;W5MFM2;W5MFP4	3.19093	1.85266	ALINADELANDVAGAEALLDR		107	718.709	2153.11	3	2.54416	185.541
	A0A0R4IJ08;A0A0D9SGF6;A0A0P7V2T7;A0A0P7VEP4;A0A0S7GFS2;A0A0S7GFS3;A0A0S7GGW7;A0A0S7GI92;A0A0S7GKU3;A0A1A7WGD9;A0A1A7Z4A6;A0A1A8AIC9;A0A1A8DRB6;A0A1A8GCR2;A0A1A8KF62;A0A1A8MAY9;A0A1A8MXE6;A0A1A8QNY9;A0A1A8RNY5;A0A1A8SFC1;A0A1A8UI02;A0A060XII9;A0A060XJX9;A0A087XQU7;A0A146NIU7;A0A146Q523;A0A146Z4J7;A0A146Z4L3;A0A146Z4P1;A0A146Z6F5;A0A146Z650;C0PUV6;F1R443;F1R445;F1R446;F8K8N3;G3Q393;G3Q398;H2MBY2;H2…	2.21306	2.37499	IEDLGAAMEEALILDNK		106.2	922.972	1843.93	2	5.60561	153.845
	A0A0R4IJ08;A0A0D9SGF6;A0A0P7V2T7;A0A0P7VEP4;A0A0S7GFS2;A0A0S7GFS3;A0A0S7GGW7;A0A0S7GI92;A0A0S7GKU3;A0A1A7WGD9;A0A1A7Z4A6;A0A1A8AIC9;A0A1A8DRB6;A0A1A8GCR2;A0A1A8KF62;A0A1A8MAY9;A0A1A8MXE6;A0A1A8QNY9;A0A1A8RNY5;A0A1A8SFC1;A0A1A8UI02;A0A060XII9;A0A060XJX9;A0A087XQU7;A0A146NIU7;A0A146Q523;A0A146Z4J7;A0A146Z4L3;A0A146Z4P1;A0A146Z6F5;A0A146Z650;C0PUV6;F1R443;F1R445;F1R446;F8K8N3;G3Q393;G3Q398;H2MBY2;H2…	12.4474	0.768997	KIEDLGAAMEEALILDNK		99.23	658.351	1972.03	3	5.84731	152.693
	A0A0R4IJ08;A0A0D9SGF6;A0A0P7V2T7;A0A0P7VEP4;A0A0S7GFR3;A0A0S7GFS2;A0A0S7GG64;A0A0S7GKU3;A0A0S7GLM7;A0A1A7WGD9;A0A1A7Z4A6;A0A1A8D2Q6;A0A1A8GCR2;A0A1A8I584;A0A1A8KR84;A0A1A8MXE6;A0A1A8QNY9;A0A1A8SFC1;A0A060XII9;A0A060XJX9;A0A146NIL5;A0A146NIU7;A0A146NJR6;A0A146Q523;A0A146Z4H1;A0A146Z4J7;A0A146Z4K2;A0A146Z4L3;A0A146Z4P1;A0A146Z5L2;A0A146Z6F5;A0A146Z650;F1R443;F1R446;G3Q393;G3Q398;H2UIB0;H2UIB1;H3CBT…	1.03818	2427.31	QQVAPTDDETGKELVLALYDYQEK		96.33	918.458	2752.35	3	4.07101	131.026
	A0A0R4IJ08;A0A0D9SGF6;A0A0P7V2T7;A0A0S7GFR3;A0A0S7GFS2;A0A0S7GG64;A0A0S7GKU3;A0A0S7GLM7;A0A1A7WGD9;A0A1A7Z4A6;A0A1A8D2Q6;A0A1A8D8C3;A0A1A8GCR2;A0A1A8I584;A0A1A8KR84;A0A1A8MAY9;A0A1A8RNY5;A0A1A8SFC1;A0A060XII9;A0A060XJX9;A0A087XQU7;F1R443;F1R446;G3Q393;G3Q398;H2MBY2;I3JZ89;I3JZ90;M4A8R0;Q13813;W5KTF3;W5KTG2;W5MFM2;W5MFP4	1.03818	1.24516	RQDLEDSLQAQQYFADANEAESWMR		95.41	1001.12	3000.34	3	4.19052	134.37
	A0A0R4IJ08;A0A0S7GFQ2;A0A0S7GFQ8;A0A0S7GFR3;A0A0S7GFS1;A0A0S7GFS2;A0A0S7GFS3;A0A0S7GG64;A0A0S7GGW2;A0A0S7GGW7;A0A0S7GI92;A0A0S7GKU3;A0A0S7GLM7;A0A0S7GLW5;A0A0S7GNH5;A0A1A7WGD9;A0A1A7Z4A6;A0A1A8AIC9;A0A1A8DRB6;A0A1A8GCR2;A0A1A8KF62;A0A1A8MAY9;A0A1A8MXE6;A0A1A8QNY9;A0A1A8RNY5;A0A1A8SFC1;A0A1A8UI02;A0A060XII9;A0A087XQU7;A0A146NIL5;A0A146NIU7;A0A146NJR6;A0A146Q523;A0A146Z4H1;A0A146Z4J7;A0A146Z4K2;A0A…	1.47246	0.92686	GVIDTGNALIQR		93.15	628.853	1255.69	2	1.68535	71.0409
	A0A0R4IJ08;A0A0D9SGF6;A0A0P7V2T7;A0A0P7VEP4;A0A1A7WGD9;A0A1A7Z4A6;A0A1A8D2Q6;A0A1A8D8C3;A0A1A8GCR2;A0A1A8I584;A0A1A8KR84;A0A1A8MAY9;A0A1A8QC83;A0A1A8SFC1;A0A1A8UI02;A0A060XII9;A0A060XJX9;A0A087XQU7;A0A146Q523;A0A146Z4H1;A0A146Z4J7;A0A146Z4K2;A0A146Z4L3;A0A146Z4P1;A0A146Z5L2;A0A146Z6F5;A0A146Z650;F1R443;F1R446;G3Q393;G3Q398;H2MBY2;H2UIA9;H2UIB0;H2UIB1;H3C0G3;H3CBT9;I3JZ89;I3JZ90;M4A8R0;Q4T9R4;Q4T9…	1.02938	1.07542	HQAFEAELSANQSR		92.43	529.923	1586.75	3	4.18109	40.423
	A0A0R4IJ08;A0A0D9SFH4;A0A0D9SGF6;A0A0P7V2T7;A0A0P7VEP4;A0A0S7GFS2;A0A0S7GFS3;A0A0S7GGW7;A0A0S7GI92;A0A0S7GKU3;A0A1A7WGD9;A0A1A7Z4A6;A0A1A8AIC9;A0A1A8DRB6;A0A1A8GCR2;A0A1A8KF62;A0A1A8MAY9;A0A1A8MXE6;A0A1A8QNY9;A0A1A8RNY5;A0A1A8SFC1;A0A1A8UI02;A0A060XII9;A0A060XJX9;A0A087XQU7;A0A146NIU7;A0A146Q523;A0A146Z4J7;A0A146Z4L3;A0A146Z4P1;A0A146Z650;C0PUV6;F1R443;F1R445;F1R446;F8K8N3;G3Q393;G3Q398;H2MBY2;H2…	1.80805	0.865306	SSEEIESAFR		88.75	577.771	1153.53	2	-1.61916	51.3788
	A0A0R4IJ08;A0A0P7VEP4;A0A0S7GFS1;A0A0S7GFS2;A0A0S7GFS3;A0A0S7GG64;A0A0S7GGW2;A0A0S7GGW7;A0A0S7GI92;A0A0S7GKU3;A0A0S7GLM7;A0A0S7GLW5;A0A1A7WGD9;A0A1A7Z4A6;A0A1A8AIC9;A0A1A8DRB6;A0A1A8GCR2;A0A1A8KF62;A0A1A8MAY9;A0A1A8MXE6;A0A1A8QNY9;A0A1A8RNY5;A0A1A8SFC1;A0A1A8UI02;A0A060XII9;A0A060XJX9;A0A087XQU7;A0A146NIL5;A0A146NIU7;A0A146NJR6;A0A146Q523;A0A146Z4J7;A0A146Z4K2;A0A146Z4L3;A0A146Z4P1;A0A146Z6F5;A0A…	145.971	0.577478	QETFDAGLQAFQQEGITNITALK		88.67	841.766	2522.28	3	3.03161	153.268
	A0A0R4IJ08;A0A060XII9;A0A060XJX9;F1R443;F1R446;W5KTF3;W5KTG2	2.25083	1.26027	ENLLDEQGSIGLR		87.54	722.375	1442.74	2	-2.74321	85.0251
	A0A0R4IJ08;A0A0D9SGF6;A0A0P7VEP4;A0A0S7GFS2;A0A0S7GFS3;A0A0S7GGW7;A0A0S7GI92;A0A0S7GKU3;A0A1A7WGD9;A0A1A7Z4A6;A0A1A8AIC9;A0A1A8DRB6;A0A1A8GCR2;A0A1A8KF62;A0A1A8MAY9;A0A1A8MXE6;A0A1A8QNY9;A0A1A8RNY5;A0A1A8SFC1;A0A1A8UI02;A0A060XII9;A0A060XJX9;A0A087XQU7;A0A146NIU7;A0A146Q523;A0A146Z4J7;A0A146Z4L3;A0A146Z4P1;A0A146Z6F5;A0A146Z650;C0PUV6;F1R443;F1R445;F1R446;F8K8N3;G3Q393;G3Q398;H2MBY2;H2UGD2;H3C0G3…	0.233289	0.00119199	YTEHSTVGLAQQWDQLDQLGMR		87.43	859.415	2575.22	3	5.41344	132.586
	A0A0R4IJ08;A0A0D9SGF6;A0A0P7VEP4;A0A060XII9;A0A060XJX9;F1R443;F1R446;G3Q393;G3Q398;H2UIA9;H2UIB0;H2UIB1;H3C0G3;H3CBT9;I3JZ89;I3JZ90;Q4T9R4;Q4T9R5;Q566W8;Q13813;W5KTF3;W5KTG2;W5MFM2;W5MFP4	1.14844	0.843343	LFGAAEVQR		87	495.772	989.53	2	0.100762	47.4206
	A0A0R4IJ08;A0A0D9SGF6;A0A0P7V2T7;A0A1A7WGD9;A0A1A7Z4A6;A0A1A8D2Q6;A0A1A8GCR2;A0A1A8I584;A0A1A8KR84;A0A1A8MXE6;A0A1A8QNY9;A0A1A8SFC1;A0A060XII9;A0A060XJX9;F1R443;F1R446;G3Q393;G3Q398;Q13813;W5KTF3;W5KTG2	1.54542	1.00188	EANELQQWINEK		84.85	751.369	1500.72	2	1.77925	86.718
	A0A0R4IJ08;A0A0D9SGF6;A0A0P7VEP4;A0A0S7GFQ8;A0A0S7GFR3;A0A0S7GFS1;A0A0S7GFS2;A0A0S7GFS3;A0A0S7GFT9;A0A0S7GG64;A0A0S7GGW2;A0A0S7GGW7;A0A0S7GKU3;A0A0S7GLM7;A0A0S7GNH5;A0A1A7WGD9;A0A1A7Z4A6;A0A1A8AIC9;A0A1A8DRB6;A0A1A8GCR2;A0A1A8KF62;A0A1A8MAY9;A0A1A8MXE6;A0A1A8QNY9;A0A1A8RNY5;A0A1A8SFC1;A0A1A8UI02;A0A060XII9;A0A060XJX9;A0A087XQU7;A0A146NIL5;A0A146NIU7;A0A146NJR6;A0A146Q523;A0A146Z4H1;A0A146Z4J7;A0A…	639.152	1.0256	DCEQAENWMAAR	[2] Methylthio (C)	84.18	735.286	1468.56	2	4.578	79.8609
	A0A0R4IJ08;A0A0S7GFR3;A0A0S7GFS2;A0A0S7GG64;A0A0S7GKU3;A0A0S7GLM7;A0A1A7WGD9;A0A1A7Z4A6;A0A1A8D2Q6;A0A1A8D8C3;A0A1A8GCR2;A0A1A8I584;A0A1A8KR84;A0A1A8QNY9;A0A1A8SFC1;A0A060XII9;A0A060XJX9;A0A087XQU7;A0A146NIL5;A0A146NIU7;A0A146NJR6;A0A146Q523;A0A146Z4H1;A0A146Z4J7;A0A146Z4K2;A0A146Z4L3;A0A146Z4P1;A0A146Z5L2;A0A146Z6F5;A0A146Z650;F1R443;F1R446;H2UIA9;H2UIB0;H2UIB1;M4A8R0;W5KTF3;W5KTG2	1.21813	0.849124	EKEPIVGSPDYGKDEDSAEALLK		83.57	623.313	2489.22	4	0.933673	82.5533
	A0A0R4IJ08;A0A0D9SGF6;A0A0P7V2T7;A0A0S7GFR3;A0A0S7GFS1;A0A0S7GFS2;A0A0S7GFS3;A0A0S7GG64;A0A0S7GGW2;A0A0S7GGW7;A0A0S7GKU3;A0A0S7GLM7;A0A0S7GNH5;A0A1A7WGD9;A0A1A7Z4A6;A0A1A8AIC9;A0A1A8DRB6;A0A1A8GCR2;A0A1A8MAY9;A0A1A8MXE6;A0A1A8QNY9;A0A1A8RNY5;A0A1A8SFC1;A0A1A8UI02;A0A060XII9;A0A060XJX9;A0A087XQU7;A0A146NIL5;A0A146NIU7;A0A146NJR6;A0A146Q523;A0A146Z4H1;A0A146Z4J7;A0A146Z4K2;A0A146Z4L3;A0A146Z4P1;A0A…	342.749	49.8991	DADETKEWIEEK		83.48	746.846	1491.68	2	5.32486	44.8114
	A0A0R4IJ08;A0A0D9SGF6;A0A0P7V2T7;A0A0P7VEP4;A0A0S7GFQ8;A0A0S7GFR3;A0A0S7GFS1;A0A0S7GFS2;A0A0S7GFS3;A0A0S7GFT9;A0A0S7GG64;A0A0S7GGW2;A0A0S7GGW7;A0A0S7GKU3;A0A0S7GLM7;A0A0S7GNH5;A0A1A7WGD9;A0A1A7Z4A6;A0A1A8AIC9;A0A1A8DRB6;A0A1A8GCR2;A0A1A8KF62;A0A1A8MAY9;A0A1A8MXE6;A0A1A8QNY9;A0A1A8RNY5;A0A1A8SFC1;A0A1A8UI02;A0A060XII9;A0A060XJX9;A0A087XQU7;A0A146NIL5;A0A146NIU7;A0A146NJR6;A0A146Q523;A0A146Z4H1;A0A…	1.58256	1.52869	DVTGAEALLER		82.72	587.31	1172.6	2	3.83635	77.9559
	A0A0R4IJ08;A0A0D9SGF6;A0A0P7V2T7;A0A0P7VEP4;A0A1A7WGD9;A0A1A7Z4A6;A0A1A8D2Q6;A0A1A8D8C3;A0A1A8GCR2;A0A1A8I584;A0A1A8KR84;A0A1A8MAY9;A0A1A8QC83;A0A1A8SFC1;A0A1A8UI02;A0A060XII9;A0A060XJX9;A0A087XQU7;A0A146Q523;A0A146Z4H1;A0A146Z4J7;A0A146Z4K2;A0A146Z4L3;A0A146Z4P1;A0A146Z5L2;A0A146Z6F5;A0A146Z650;F1R443;F1R446;G3Q393;G3Q398;H2MBY2;H2UIA9;H2UIB0;H2UIB1;H3C0G3;H3CBT9;I3JZ89;I3JZ90;M4A8R0;Q4T9R4;Q4T9…	1.36222	1.05396	HQAFEAELSANQSR		82.34	794.38	1586.75	2	3.32603	40.4952
	A0A0R4IJ08;A0A0D9SGF6;A0A0P7V2T7;A0A0P7VEP4;A0A0S7GKE8;A0A0S7GMT1;A0A0S7GQA6;A0A1A7WGD9;A0A1A7Z4A6;A0A1A8D2Q6;A0A1A8D8C3;A0A1A8GCR2;A0A1A8I584;A0A1A8KR84;A0A1A8MAY9;A0A1A8QC83;A0A1A8SFC1;A0A1A8UI02;A0A060XII9;A0A060XJX9;A0A087XQU7;A0A146Q523;A0A146Z4H1;A0A146Z4K2;A0A146Z4L3;A0A146Z4P1;A0A146Z5L2;A0A146Z6F5;F1R443;F1R446;G3Q393;G3Q398;H2MBY2;H2UIA9;H2UIB0;H2UIB1;H3C0G3;H3CBT9;I3JZ89;I3JZ90;M4A8R0;…	13.9598	12.7181	DLASVQALLR		82.27	543.319	1084.62	2	4.01573	111.985
	A0A0R4IJ08;A0A0S7GFS1;A0A0S7GFS2;A0A0S7GFS3;A0A0S7GG64;A0A0S7GGW2;A0A0S7GGW7;A0A0S7GI92;A0A0S7GKU3;A0A0S7GLM7;A0A0S7GLW5;A0A1A7WGD9;A0A1A7Z4A6;A0A1A8AIC9;A0A1A8DRB6;A0A1A8GCR2;A0A1A8KF62;A0A1A8MAY9;A0A1A8MXE6;A0A1A8QNY9;A0A1A8RNY5;A0A1A8SFC1;A0A1A8UI02;A0A060XII9;A0A060XJX9;A0A087XQU7;A0A146NIL5;A0A146NIU7;A0A146NJR6;A0A146Q523;A0A146Z4J7;A0A146Z4L3;A0A146Z4P1;A0A146Z6F5;A0A146Z650;C0PUV6;F1R443;…	0.00243808	1.43642	QETFDAGLQAFQQEGITNITALKDQLLAAK		81.55	1088.24	3261.69	3	0.395662	190.428
	A0A0R4IJ08;A0A0S7GKE8;A0A0S7GKV9;A0A0S7GQU7;A0A1A8D2Q6;A0A1A8D8C3;A0A1A8GCR2;A0A1A8I584;A0A1A8KR84;A0A1A8MAY9;A0A1A8QC83;A0A1A8SFC1;A0A1A8UI02;A0A060XII9;A0A060XJX9;A0A087XQU7;A0A146Z4H1;A0A146Z4K2;A0A146Z4L3;A0A146Z4P1;A0A146Z5L2;A0A146Z6F5;F1R443;F1R446;G3Q393;G3Q398;H2MBY2;I3JZ89;I3JZ90;M4A8R0;Q32P38;Q566W8;W5KTF3;W5KTG2;W5MFM2;W5MFP4	3.59038	0.31157	DADELEKWIQEK		80.79	752.37	1502.73	2	-2.72521	95.8845
	A0A0R4IJ08;A0A0D9SGF6;A0A0P7V2T7;A0A0P7VEP4;A0A0S7GFS1;A0A0S7GFS2;A0A0S7GFS3;A0A0S7GG64;A0A0S7GGW2;A0A0S7GGW7;A0A0S7GI92;A0A0S7GKU3;A0A0S7GLM7;A0A0S7GLW5;A0A1A7WGD9;A0A1A7Z4A6;A0A1A8AIC9;A0A1A8DRB6;A0A1A8GCR2;A0A1A8KF62;A0A1A8MAY9;A0A1A8MXE6;A0A1A8QNY9;A0A1A8RNY5;A0A1A8SFC1;A0A1A8UI02;A0A060XII9;A0A060XJX9;A0A087XQU7;A0A146NIL5;A0A146NIU7;A0A146NJR6;A0A146Q523;A0A146Z4J7;A0A146Z4K2;A0A146Z4L3;A0A…	3.42187	0.776863	ADVVESWIGEK		80.45	616.814	1231.61	2	3.30561	81.7777
	A0A0R4IJ08;A0A0D9SGF6;A0A0P7V2T7;A0A0P7VEP4;A0A0S7GKE8;A0A0S7GMT1;A0A0S7GQA6;A0A1A7WGD9;A0A1A7Z4A6;A0A1A8D2Q6;A0A1A8D8C3;A0A1A8GCR2;A0A1A8I584;A0A1A8KR84;A0A1A8MAY9;A0A1A8QC83;A0A1A8SFC1;A0A1A8UI02;A0A060XII9;A0A060XJX9;A0A087XQU7;A0A146Q523;A0A146Z4H1;A0A146Z4K2;A0A146Z4L3;A0A146Z4P1;A0A146Z5L2;A0A146Z6F5;A0A146Z650;F1R443;F1R446;G3Q393;G3Q398;H2MBY2;H2UIA9;H2UIB0;H2UIB1;H3C0G3;H3CBT9;I3JZ89;I3J…	4.51153	0.892071	DTEQVDNWMSK		79.45	676.796	1351.58	2	5.05027	55.3468
	A0A0R4IJ08;A0A0S7GFS1;A0A0S7GFS2;A0A0S7GFS3;A0A0S7GG64;A0A0S7GGW2;A0A0S7GGW7;A0A0S7GI92;A0A0S7GKU3;A0A0S7GLM7;A0A0S7GLW5;A0A1A7WGD9;A0A1A7Z4A6;A0A1A8AIC9;A0A1A8DRB6;A0A1A8GCR2;A0A1A8KF62;A0A1A8MAY9;A0A1A8MXE6;A0A1A8QNY9;A0A1A8RNY5;A0A1A8SFC1;A0A1A8UI02;A0A060XII9;A0A060XJX9;A0A087XQU7;A0A146NIL5;A0A146NIU7;A0A146NJR6;A0A146Q523;A0A146Z4J7;A0A146Z4L3;A0A146Z4P1;A0A146Z6F5;A0A146Z650;C0PUV6;F1R443;…	1158.65	1.01947	QETFDAGLQAFQQEGITNITALKDQLLAAK		78.96	816.434	3261.71	4	4.85996	190.921
	A0A0R4IJ08;A0A0S7GFS1;A0A0S7GFS2;A0A0S7GFS3;A0A0S7GG64;A0A0S7GGW2;A0A0S7GGW7;A0A0S7GI92;A0A0S7GKU3;A0A0S7GLM7;A0A0S7GLW5;A0A1A7WGD9;A0A1A7Z4A6;A0A1A8AIC9;A0A1A8DRB6;A0A1A8GCR2;A0A1A8KF62;A0A1A8MAY9;A0A1A8MXE6;A0A1A8QNY9;A0A1A8RNY5;A0A1A8SFC1;A0A1A8UI02;A0A060XII9;A0A060XJX9;A0A087XQU7;A0A146NIL5;A0A146NIU7;A0A146NJR6;A0A146Q523;A0A146Z4J7;A0A146Z4L3;A0A146Z4P1;A0A146Z6F5;A0A146Z650;C0PUV6;F1R443;…	176.05	1.01947	QETFDAGLQAFQQEGITNITALKDQLLAAK	[N-term] Gln->pyro-Glu (N-term Q)	77.51	1082.57	3244.68	3	4.79505	192.126
	A0A0R4IJ08;A0A0P7VEP4;A0A0S7GKQ9;A0A0S7GMT1;A0A0S7GRJ6;A0A1A7WGD9;A0A1A7Z4A6;A0A1A8D2Q6;A0A1A8D8C3;A0A1A8GCR2;A0A1A8I584;A0A1A8KR84;A0A1A8MAY9;A0A1A8QC83;A0A1A8SFC1;A0A1A8UI02;A0A060XII9;A0A087XQU7;A0A146Q523;A0A146Z4H1;A0A146Z4K2;A0A146Z4L3;A0A146Z4P1;A0A146Z5L2;A0A146Z6F5;A0A146Z650;F1R443;F1R446;G3Q393;G3Q398;H2UIA9;H2UIB0;H2UIB1;H3C0G3;H3CBT9;I3JZ89;I3JZ90;M4A8R0;Q4T9R4;Q4T9R5;W5KTF3;W5KTG2;W…	1.19251	1.01947	RAALEDSFHLQQFFR		77.08	622.323	1863.95	3	3.76403	124.952
	A0A0R4IJ08;A0A0S7GFR3;A0A0S7GFS3;A0A0S7GG64;A0A0S7GGW2;A0A0S7GKU3;A0A0S7GNH5;A0A1A7WGD9;A0A1A7Z4A6;A0A1A8AIC9;A0A1A8DRB6;A0A1A8GCR2;A0A1A8KF62;A0A1A8MAY9;A0A1A8MXE6;A0A1A8QNY9;A0A1A8RNY5;A0A1A8SFC1;A0A1A8UI02;A0A060XII9;A0A060XJX9;A0A087XQU7;A0A146NIL5;A0A146NIU7;A0A146NJR6;A0A146Z4H1;A0A146Z4P1;F1R446;G3Q398;H2MBY2;H2UIB0;I3JZ89;M4A8R0;W5KTF3;W5KTG2;W5MFM2;W5MFP4	1.81363	0.890157	LQTATDESYKDPTNIQLSK		77.03	718.032	2151.07	3	1.28737	63.1219
	A0A0R4IJ08;A0A0D9SGF6;A0A0P7V2T7;A0A0P7VEP4;A0A0S7GFS1;A0A0S7GFS2;A0A0S7GFS3;A0A0S7GG64;A0A0S7GGW2;A0A0S7GGW7;A0A0S7GI92;A0A0S7GKU3;A0A0S7GLM7;A0A0S7GLW5;A0A1A7WGD9;A0A1A7Z4A6;A0A1A8AIC9;A0A1A8DRB6;A0A1A8GCR2;A0A1A8KF62;A0A1A8MAY9;A0A1A8MXE6;A0A1A8QNY9;A0A1A8RNY5;A0A1A8SFC1;A0A1A8UI02;A0A060XII9;A0A060XJX9;A0A087XQU7;A0A146NIL5;A0A146NIU7;A0A146NJR6;A0A146Q523;A0A146Z4J7;A0A146Z4K2;A0A146Z4L3;A0A…	1.51824	0.852764	DLSSVQTLLTK		76.54	602.844	1203.67	2	2.8522	99.131
	A0A0R4IJ08;A0A0P7VEP4;A0A0S7GKQ9;A0A0S7GMT1;A0A0S7GRJ6;A0A1A7WGD9;A0A1A7Z4A6;A0A1A8D2Q6;A0A1A8D8C3;A0A1A8GCR2;A0A1A8I584;A0A1A8KR84;A0A1A8MAY9;A0A1A8QC83;A0A1A8SFC1;A0A1A8UI02;A0A060XII9;A0A060XJX9;A0A087XQU7;A0A146Q523;A0A146Z4H1;A0A146Z4K2;A0A146Z4L3;A0A146Z4P1;A0A146Z5L2;A0A146Z6F5;A0A146Z650;F1R443;F1R446;G3Q393;G3Q398;H2MBY2;H2UIA9;H2UIB0;H2UIB1;H3C0G3;H3CBT9;I3JZ89;I3JZ90;M4A8R0;Q4T9R4;Q4T9…	1.13379	1.01947	DSDELKSWINEK		75.04	732.356	1462.7	2	5.36109	70.5467
	A0A0R4IJ08;A0A0D9SGF6;A0A0P7V2T7;A0A0P7VEP4;A0A0S7GFS1;A0A0S7GFS2;A0A0S7GFS3;A0A0S7GG64;A0A0S7GGW2;A0A0S7GGW7;A0A0S7GI92;A0A0S7GKU3;A0A0S7GLM7;A0A0S7GLW5;A0A1A7WGD9;A0A1A7Z4A6;A0A1A8AIC9;A0A1A8DRB6;A0A1A8GCR2;A0A1A8KF62;A0A1A8MAY9;A0A1A8MXE6;A0A1A8QNY9;A0A1A8RNY5;A0A1A8SFC1;A0A1A8UI02;A0A060XII9;A0A060XJX9;A0A087XQU7;A0A146NIL5;A0A146NIU7;A0A146NJR6;A0A146Q523;A0A146Z4J7;A0A146Z4K2;A0A146Z4L3;A0A…	1.03818	0.845309	ASAFNSWFENAEEDLTDPVR		74.24	1149.52	2297.03	2	4.16893	161.833
	A0A0R4IJ08;A0A0D9SGF6;A0A0P7VEP4;A0A0S7GFR3;A0A0S7GFS2;A0A0S7GG64;A0A0S7GKU3;A0A0S7GLM7;A0A1A7WGD9;A0A1A7Z4A6;A0A1A8D2Q6;A0A1A8GCR2;A0A1A8I584;A0A1A8KR84;A0A1A8MXE6;A0A1A8QNY9;A0A1A8SFC1;A0A060XII9;A0A146NIL5;A0A146NIU7;A0A146NJR6;A0A146Q523;A0A146Z4H1;A0A146Z4J7;A0A146Z4K2;A0A146Z4L3;A0A146Z4P1;A0A146Z5L2;A0A146Z6F5;A0A146Z650;F1R443;F1R446;G3Q393;G3Q398;H2MBY2;H2UIA9;H2UIB0;H2UIB1;H3C0G3;H3CBT9…	9.89134	42.8179	KGDILTLLNSTNKDWWK		73.99	678.035	2031.08	3	1.34542	153.628
	A0A0R4IJ08;A0A0D9SGF6;A0A0P7VEP4;A0A0S7GKE8;A0A0S7GMT1;A0A0S7GQA6;A0A1A7WGD9;A0A1A7Z4A6;A0A1A8D2Q6;A0A1A8D8C3;A0A1A8GCR2;A0A1A8I584;A0A1A8KR84;A0A1A8MAY9;A0A1A8QC83;A0A1A8SFC1;A0A1A8UI02;A0A060XII9;A0A060XJX9;A0A087XQU7;A0A146Q523;A0A146Z4H1;A0A146Z4K2;A0A146Z4L3;A0A146Z4P1;A0A146Z5L2;A0A146Z6F5;A0A146Z650;F1R443;F1R446;G3Q393;G3Q398;I3JZ89;I3JZ90;M4A8R0;Q566W8;Q13813;W5KTF3;W5KTG2;W5MFM2;W5MFP4	2.07143	0.191413	DLTSWVTEMK		73.73	605.296	1208.58	2	6.47796	114.66
	A0A0R4IJ08;A0A0D9SGF6;A0A0P7V2T7;A0A060XJX9;A0A146Q523;A0A146Z4H1;A0A146Z4J7;A0A146Z4K2;A0A146Z4L3;A0A146Z4P1;A0A146Z5L2;A0A146Z6F5;A0A146Z650;F1QDX2;F1R443;F1R446;G3Q393;G3Q398;H2MBY2;H3C0G3;H3CBT9;I3JZ89;I3JZ90;Q4T9R4;Q4T9R5;Q13813;W5KTF3;W5KTG2;W5MFM2;W5MFP4	1.34405	1.11579	DLAALGDKVNSLGETAER		73.23	620.321	1857.94	3	0.633634	86.0829
	A0A0R4IJ08;A0A0S7GFQ8;A0A0S7GFR3;A0A0S7GFS1;A0A0S7GFS2;A0A0S7GFS3;A0A0S7GFT9;A0A0S7GG64;A0A0S7GGW2;A0A0S7GGW7;A0A0S7GKU3;A0A0S7GLM7;A0A0S7GNH5;A0A1A7WGD9;A0A1A7Z4A6;A0A1A8AIC9;A0A1A8DRB6;A0A1A8GCR2;A0A1A8KF62;A0A1A8MAY9;A0A1A8MXE6;A0A1A8QNY9;A0A1A8RNY5;A0A1A8SFC1;A0A1A8UI02;A0A060XII9;A0A060XJX9;A0A087XQU7;A0A146NIL5;A0A146NIU7;A0A146NJR6;A0A146Q523;A0A146Z4H1;A0A146Z4J7;A0A146Z4K2;A0A146Z4L3;A0A…	1.2166	0.487952	EAFLASDDKGDSLDSVEALIK		71.06	741.709	2222.11	3	2.41343	138.153
	A0A0R4IJ08;A0A0D9SGF6;A0A0P7V2T7;A0A0P7VEP4;A0A0S7GFS2;A0A0S7GFS3;A0A0S7GGW7;A0A0S7GI92;A0A0S7GKU3;A0A1A7WGD9;A0A1A7Z4A6;A0A1A8AIC9;A0A1A8DRB6;A0A1A8GCR2;A0A1A8KF62;A0A1A8MAY9;A0A1A8MXE6;A0A1A8QNY9;A0A1A8RNY5;A0A1A8SFC1;A0A1A8UI02;A0A060XII9;A0A060XJX9;A0A087XQU7;A0A146NIU7;A0A146Q523;A0A146Z4J7;A0A146Z4L3;A0A146Z4P1;A0A146Z6F5;A0A146Z650;C0PUV6;F1R443;F1R445;F1R446;F8K8N3;G3Q393;G3Q398;H2MBY2;H2…	748.413	24.6248	KIEDLGAAMEEALILDNK		70.83	987.022	1972.03	2	5.20131	152.693
	A0A0R4IJ08;A0A0D9SGF6;A0A0P7V2T7;A0A0P7VEP4;A0A0S7GFR3;A0A0S7GFS2;A0A0S7GG64;A0A0S7GKU3;A0A0S7GLM7;A0A1A7WGD9;A0A1A7Z4A6;A0A1A8D2Q6;A0A1A8GCR2;A0A1A8I584;A0A1A8KR84;A0A1A8MAY9;A0A1A8SFC1;A0A060XII9;A0A060XJX9;A0A087XQU7;A0A146NIL5;A0A146NIU7;A0A146NJR6;A0A146Q523;A0A146Z4H1;A0A146Z4J7;A0A146Z4L3;A0A146Z4P1;A0A146Z5L2;A0A146Z6F5;A0A146Z650;F1R443;F1R446;G3Q393;G3Q398;H2MBY2;H2UIA9;H2UIB0;H2UIB1;H3…	0.646554	0.72502	GKDLIGVQNLLK		69.7	649.397	1296.78	2	-1.08841	96.0961
	A0A0R4IJ08;A0A0P7VEP4;A0A060XII9;A0A060XJX9;F1R443;F1R446;G3Q393;G3Q398;H2UIA9;H2UIB0;H2UIB1;H3C0G3;H3CBT9;I3JZ89;I3JZ90;Q4T9R4;W5KTF3;W5KTG2;W5MFM2;W5MFP4	0.109469	1.64738	LLVSSEDYGR		68.99	569.792	1137.57	2	-0.811243	46.0808
	A0A0R4IJ08;A0A0S7GFR3;A0A0S7GFS2;A0A0S7GG64;A0A0S7GKU3;A0A0S7GLM7;A0A1A7WGD9;A0A1A7Z4A6;A0A1A8D2Q6;A0A1A8D8C3;A0A1A8GCR2;A0A1A8I584;A0A1A8KR84;A0A1A8QNY9;A0A1A8SFC1;A0A060XII9;A0A060XJX9;A0A087XQU7;A0A146NIL5;A0A146NIU7;A0A146NJR6;A0A146Q523;A0A146Z4H1;A0A146Z4J7;A0A146Z4K2;A0A146Z4L3;A0A146Z4P1;A0A146Z5L2;A0A146Z6F5;A0A146Z650;F1R443;F1R446;H2UIA9;H2UIB0;H2UIB1;M4A8R0;W5KTF3;W5KTG2	1.86448	25.3728	EKEPIVGSPDYGKDEDSAEALLK		67.62	830.747	2489.22	3	-0.0692612	82.4828
	A0A0R4IJ08;A0A0D9SGF6;A0A0P7V2T7;A0A0P7VEP4;A0A060XII9;A0A060XJX9;F1R443;F1R446;G3Q393;G3Q398;H2UIA9;H2UIB0;H2UIB1;H3C0G3;H3CBT9;I3JZ89;I3JZ90;Q4T9R4;Q4T9R5;Q13813;W5KTF3;W5KTG2;W5MFM2;W5MFP4	0.996473	0.855391	TATDEAYKDPSNLQGK		67.48	579.948	1736.82	3	2.06475	28.4351
	A0A0R4IJ08;A0A0D9SGF6;A0A0P7VEP4;A0A0S7GFR3;A0A0S7GFS1;A0A0S7GFS2;A0A0S7GFS3;A0A0S7GG64;A0A0S7GGW2;A0A0S7GGW7;A0A0S7GKU3;A0A0S7GLM7;A0A0S7GNH5;A0A1A7WGD9;A0A1A7Z4A6;A0A1A8AIC9;A0A1A8DRB6;A0A1A8GCR2;A0A1A8KF62;A0A1A8MAY9;A0A1A8MXE6;A0A1A8QNY9;A0A1A8RNY5;A0A1A8SFC1;A0A1A8UI02;A0A060XII9;A0A060XJX9;A0A087XQU7;A0A146NIL5;A0A146NIU7;A0A146NJR6;A0A146Q523;A0A146Z4H1;A0A146Z4J7;A0A146Z4K2;A0A146Z4L3;A0A…	1.68847	1.87492	DLMSWINGIR		67.46	602.812	1203.61	2	-0.298836	155.21
	A0A0R4IJ08;A0A0D9SGF6;A0A0P7V2T7;A0A0P7VEP4;A0A0S7GFS1;A0A0S7GFS2;A0A0S7GFS3;A0A0S7GG64;A0A0S7GGW2;A0A0S7GGW7;A0A0S7GI92;A0A0S7GKU3;A0A0S7GLM7;A0A0S7GLW5;A0A1A7WGD9;A0A1A7Z4A6;A0A1A8AIC9;A0A1A8DRB6;A0A1A8GCR2;A0A1A8KF62;A0A1A8MAY9;A0A1A8MXE6;A0A1A8QNY9;A0A1A8RNY5;A0A1A8SFC1;A0A1A8UI02;A0A060XII9;A0A060XJX9;A0A087XQU7;A0A146NIL5;A0A146NIU7;A0A146NJR6;A0A146Q523;A0A146Z4J7;A0A146Z4K2;A0A146Z4L3;A0A…	44.1651	0.424204	ASAFNSWFENAEEDLTDPVR		66.91	766.686	2297.04	3	6.9364	164.274
	A0A0R4IJ08;A0A0D9SGF6;A0A0P7V2T7;A0A0P7VEP4;A0A0S7GFR3;A0A0S7GFS2;A0A0S7GG64;A0A0S7GKU3;A0A0S7GLM7;A0A1A7WGD9;A0A1A7Z4A6;A0A1A8D2Q6;A0A1A8D8C3;A0A1A8GCR2;A0A1A8I584;A0A1A8KR84;A0A1A8MAY9;A0A1A8QC83;A0A1A8SFC1;A0A060XJX9;A0A087XQU7;A0A146NIL5;A0A146NIU7;A0A146NJR6;A0A146Q523;A0A146Z4H1;A0A146Z4J7;A0A146Z4K2;A0A146Z4L3;A0A146Z4P1;A0A146Z5L2;A0A146Z6F5;A0A146Z650;F1R443;F1R446;G3Q393;G3Q398;H2MBY2;H…	1.77112	0.00401734	DVEDEETWIR		65.86	646.296	1290.58	2	5.49503	68.6247
	A0A0R4IJ08;A0A0P7VEP4;A0A0S7GFS1;A0A0S7GFS2;A0A0S7GFS3;A0A0S7GG64;A0A0S7GGW2;A0A0S7GGW7;A0A0S7GI92;A0A0S7GKU3;A0A0S7GLM7;A0A0S7GLW5;A0A1A7WGD9;A0A1A7Z4A6;A0A1A8AIC9;A0A1A8DRB6;A0A1A8GCR2;A0A1A8KF62;A0A1A8MAY9;A0A1A8MXE6;A0A1A8QNY9;A0A1A8RNY5;A0A1A8SFC1;A0A1A8UI02;A0A060XII9;A0A060XJX9;A0A087XQU7;A0A146NIL5;A0A146NIU7;A0A146NJR6;A0A146Q523;A0A146Z4J7;A0A146Z4K2;A0A146Z4L3;A0A146Z4P1;A0A146Z6F5;A0A…	357.792	2.6172	CNSLEEIR	[1] Methylthio (C)	65.69	505.229	1008.44	2	4.26409	42.7674
	A0A0R4IJ08;A0A0D9SGF6;A0A0P7V2T7;A0A060XJX9;A0A146Q523;A0A146Z4H1;A0A146Z4J7;A0A146Z4K2;A0A146Z4L3;A0A146Z4P1;A0A146Z5L2;A0A146Z6F5;A0A146Z650;F1QDX2;F1R443;F1R446;G3Q393;G3Q398;H2MBY2;H3C0G3;H3CBT9;I3JZ89;I3JZ90;Q4T9R4;Q4T9R5;Q13813;W5KTF3;W5KTG2;W5MFM2;W5MFP4	1.01779	0.0478746	VNSLGETAER		65.66	538.272	1074.53	2	-0.776137	20.515
	A0A0R4IJ08;A0A0D9SGF6;A0A0P7V2T7;A0A0P7VEP4;A0A0S7GKQ9;A0A0S7GMT1;A0A0S7GRJ6;A0A1A7WGD9;A0A1A7Z4A6;A0A1A8D2Q6;A0A1A8D8C3;A0A1A8GCR2;A0A1A8I584;A0A1A8KR84;A0A1A8MAY9;A0A1A8QC83;A0A1A8SFC1;A0A1A8UI02;A0A060XII9;A0A060XJX9;A0A087XQU7;A0A146Q523;A0A146Z4H1;A0A146Z4K2;A0A146Z4L3;A0A146Z4P1;A0A146Z5L2;A0A146Z6F5;A0A146Z650;F1R443;F1R446;G3Q393;G3Q398;H2MBY2;H2UIA9;H2UIB0;H2UIB1;H3C0G3;H3CBT9;I3JZ89;I3J…	0.821047	1.11662	ITALDEFATK		65	554.791	1107.57	2	-11.0637	72.3097
	A0A0R4IJ08;A0A0P7VEP4;A0A0S7GFQ2;A0A0S7GFQ8;A0A0S7GFR3;A0A0S7GFS1;A0A0S7GFS2;A0A0S7GFS3;A0A0S7GG64;A0A0S7GGW2;A0A0S7GGW7;A0A0S7GI92;A0A0S7GKU3;A0A0S7GLM7;A0A0S7GLW5;A0A0S7GNH5;A0A1A7WGD9;A0A1A7Z4A6;A0A1A8AIC9;A0A1A8DRB6;A0A1A8GCR2;A0A1A8KF62;A0A1A8MAY9;A0A1A8MXE6;A0A1A8QNY9;A0A1A8RNY5;A0A1A8SFC1;A0A1A8UI02;A0A060XII9;A0A060XJX9;A0A087XQU7;A0A146NIL5;A0A146NIU7;A0A146NJR6;A0A146Q523;A0A146Z4J7;A0A…	1.55949	1.01947	DLDDEESWIKEK		64.98	502.906	1505.7	3	3.79862	67.8497
	A0A0R4IJ08;A0A0D9SGF6;A0A0P7V2T7;A0A0P7VEP4;A0A0S7GFS2;A0A0S7GFS3;A0A0S7GGW7;A0A0S7GI92;A0A0S7GKU3;A0A1A7WGD9;A0A1A7Z4A6;A0A1A8AIC9;A0A1A8DRB6;A0A1A8GCR2;A0A1A8KF62;A0A1A8MAY9;A0A1A8MXE6;A0A1A8QNY9;A0A1A8RNY5;A0A1A8SFC1;A0A1A8UI02;A0A060XII9;A0A060XJX9;A0A087XQU7;A0A146NIU7;A0A146Q523;A0A146Z4J7;A0A146Z4L3;A0A146Z4P1;A0A146Z6F5;A0A146Z650;C0PUV6;F1R443;F1R445;F1R446;F8K8N3;G3Q393;G3Q398;H2MBY2;H2…	0.00150252	0.0161301	MQHNLEQQIQAR		63.72	499.254	1494.74	3	-0.210263	31.0477
	A0A0R4IJ08;A0A0P7VEP4;A0A0S7GFR3;A0A0S7GFS1;A0A0S7GFS2;A0A0S7GFS3;A0A0S7GG64;A0A0S7GGW2;A0A0S7GGW7;A0A0S7GKU3;A0A0S7GLM7;A0A0S7GNH5;A0A1A7WGD9;A0A1A7Z4A6;A0A1A8AIC9;A0A1A8DRB6;A0A1A8GCR2;A0A1A8KF62;A0A1A8MAY9;A0A1A8MXE6;A0A1A8QNY9;A0A1A8RNY5;A0A1A8SFC1;A0A1A8UI02;A0A060XII9;A0A060XJX9;A0A087XQU7;A0A146NIL5;A0A146NIU7;A0A146NJR6;A0A146Q523;A0A146Z4H1;A0A146Z4J7;A0A146Z4K2;A0A146Z4L3;A0A146Z4P1;A0A…	1.51961	32.2562	LIQSHPEAVDDIQEK		63.33	574.629	1720.86	3	2.61635	42.2722
	A0A0R4IJ08;A0A0P7V2T7;A0A0P7VEP4;A0A0S7GKE8;A0A0S7GMT1;A0A0S7GQA6;A0A1A7WGD9;A0A1A7Z4A6;A0A1A8D2Q6;A0A1A8D8C3;A0A1A8GCR2;A0A1A8I584;A0A1A8KR84;A0A1A8MAY9;A0A1A8QC83;A0A1A8SFC1;A0A1A8UI02;A0A060XII9;A0A060XJX9;A0A087XQU7;A0A146Q523;A0A146Z4H1;A0A146Z4K2;A0A146Z4L3;A0A146Z4P1;A0A146Z5L2;A0A146Z6F5;A0A146Z650;F1R443;F1R446;G3Q393;G3Q398;H2MBY2;I3JZ89;I3JZ90;M4A8R0;Q566W8;W5KTF3;W5KTG2;W5MFM2;W5MFP4	4.7557	1.01947	ALINADELANDVAGAEALLDR		63.3	1077.56	2153.1	2	2.01469	185.541
	A0A0R4IJ08;A0A0D9SGF6;A0A0P7VEP4;A0A0S7GFR3;A0A0S7GFS2;A0A0S7GG64;A0A0S7GKU3;A0A0S7GLM7;A0A1A7WGD9;A0A1A7Z4A6;A0A1A8D2Q6;A0A1A8D8C3;A0A1A8GCR2;A0A1A8I584;A0A1A8KR84;A0A1A8MAY9;A0A1A8QC83;A0A1A8SFC1;A0A1A8UI02;A0A060XII9;A0A060XJX9;A0A087XQU7;A0A146NJR6;A0A146Q523;A0A146Z4H1;A0A146Z4J7;A0A146Z4K2;A0A146Z4L3;A0A146Z4P1;A0A146Z5L2;A0A146Z6F5;A0A146Z650;F1R443;F1R446;G3Q393;G3Q398;H2MBY2;H2UIA9;H2UIB…	0.908829	0.475904	HALLEADVAAHQDR		62.69	515.936	1544.79	3	10.1322	40.423
	A0A0R4IJ08;A0A0S7GFQ8;A0A0S7GFR3;A0A0S7GFS1;A0A0S7GFS2;A0A0S7GFS3;A0A0S7GFT9;A0A0S7GG64;A0A0S7GGW2;A0A0S7GGW7;A0A0S7GKU3;A0A0S7GLM7;A0A0S7GNH5;A0A1A7WGD9;A0A1A7Z4A6;A0A1A8AIC9;A0A1A8DRB6;A0A1A8GCR2;A0A1A8KF62;A0A1A8MAY9;A0A1A8MXE6;A0A1A8QNY9;A0A1A8RNY5;A0A1A8SFC1;A0A1A8UI02;A0A060XII9;A0A060XJX9;A0A087XQU7;A0A146NIL5;A0A146NIU7;A0A146NJR6;A0A146Q523;A0A146Z4H1;A0A146Z4J7;A0A146Z4K2;A0A146Z4L3;A0A…	1.64574	1.01947	EAFLASDDKGDSLDSVEALIK		62.33	1112.06	2222.1	2	1.50482	138.153
	A0A0R4IJ08;A0A0D9SGF6;A0A0P7VEP4;A0A0S7GFQ2;A0A0S7GFQ8;A0A0S7GFR3;A0A0S7GFS1;A0A0S7GFS2;A0A0S7GFS3;A0A0S7GG64;A0A0S7GGW2;A0A0S7GGW7;A0A0S7GI92;A0A0S7GKU3;A0A0S7GLM7;A0A0S7GLW5;A0A0S7GNH5;A0A1A7WGD9;A0A1A7Z4A6;A0A1A8AIC9;A0A1A8DRB6;A0A1A8GCR2;A0A1A8KF62;A0A1A8MAY9;A0A1A8MXE6;A0A1A8QNY9;A0A1A8RNY5;A0A1A8SFC1;A0A1A8UI02;A0A060XII9;A0A060XJX9;A0A087XQU7;A0A146NIL5;A0A146NIU7;A0A146NJR6;A0A146Q523;A0A…	4.71858	1.01947	LEESLEYQQFVANVEEEEAWINEK		62.07	976.131	2925.37	3	4.07214	165.566
	A0A0R4IJ08;A0A0P7VEP4;A0A0S7GKQ9;A0A0S7GMT1;A0A0S7GRJ6;A0A1A7WGD9;A0A1A7Z4A6;A0A1A8D2Q6;A0A1A8D8C3;A0A1A8GCR2;A0A1A8I584;A0A1A8KR84;A0A1A8MAY9;A0A1A8QC83;A0A1A8SFC1;A0A1A8UI02;A0A060XII9;A0A087XQU7;A0A146Q523;A0A146Z4H1;A0A146Z4K2;A0A146Z4L3;A0A146Z4P1;A0A146Z5L2;A0A146Z6F5;A0A146Z650;F1R443;F1R446;G3Q393;G3Q398;H2UIA9;H2UIB0;H2UIB1;H3C0G3;H3CBT9;I3JZ89;I3JZ90;M4A8R0;Q4T9R4;Q4T9R5;W5KTF3;W5KTG2;W…	0.396837	0.831982	AALEDSFHLQQFFR		60.37	570.291	1707.85	3	6.80052	138.511
	A0A0R4IJ08;A0A0P7VEP4;A0A0S7GFQ2;A0A0S7GFQ8;A0A0S7GFR3;A0A0S7GFS1;A0A0S7GFS2;A0A0S7GFS3;A0A0S7GG64;A0A0S7GGW2;A0A0S7GGW7;A0A0S7GI92;A0A0S7GKU3;A0A0S7GLM7;A0A0S7GLW5;A0A0S7GNH5;A0A1A7WGD9;A0A1A7Z4A6;A0A1A8AIC9;A0A1A8DRB6;A0A1A8GCR2;A0A1A8KF62;A0A1A8MAY9;A0A1A8MXE6;A0A1A8QNY9;A0A1A8RNY5;A0A1A8SFC1;A0A1A8UI02;A0A060XII9;A0A060XJX9;A0A087XQU7;A0A146NIL5;A0A146NIU7;A0A146NJR6;A0A146Q523;A0A146Z4J7;A0A…	7.88007	0.0992557	DLDDEESWIK		60.1	625.285	1248.56	2	4.38244	78.0972
	A0A0R4IJ08;A0A0D9SGF6;A0A0P7V2T7;A0A0P7VEP4;A0A0S7GFQ2;A0A0S7GFQ8;A0A0S7GFR3;A0A0S7GFS1;A0A0S7GFS2;A0A0S7GFS3;A0A0S7GG64;A0A0S7GGW2;A0A0S7GGW7;A0A0S7GI92;A0A0S7GKU3;A0A0S7GLM7;A0A0S7GLW5;A0A0S7GNH5;A0A1A7WGD9;A0A1A7Z4A6;A0A1A8AIC9;A0A1A8DRB6;A0A1A8GCR2;A0A1A8KF62;A0A1A8MAY9;A0A1A8MXE6;A0A1A8QNY9;A0A1A8RNY5;A0A1A8SFC1;A0A1A8UI02;A0A060XII9;A0A060XJX9;A0A087XQU7;A0A146NIL5;A0A146NIU7;A0A146NJR6;A0A…	0.128867	41.2466	HQAFEAELHANADR		59.07	536.923	1607.75	3	3.95866	36.1187
	A0A0R4IJ08;A0A0S7GFR3;A0A0S7GFS1;A0A0S7GFS2;A0A0S7GFS3;A0A0S7GG64;A0A0S7GGW2;A0A0S7GGW7;A0A0S7GKU3;A0A0S7GLM7;A0A0S7GNH5;A0A1A7WGD9;A0A1A7Z4A6;A0A1A8AIC9;A0A1A8DRB6;A0A1A8GCR2;A0A1A8MAY9;A0A1A8MXE6;A0A1A8QNY9;A0A1A8RNY5;A0A1A8SFC1;A0A1A8UI02;A0A060XII9;A0A060XJX9;A0A087XQU7;A0A146NIL5;A0A146NIU7;A0A146NJR6;A0A146Q523;A0A146Z4H1;A0A146Z4J7;A0A146Z4K2;A0A146Z4L3;A0A146Z4P1;A0A146Z5L2;A0A146Z6F5;A0A…	1.11941	0.935289	SNMLGSAHEVQR		58.43	443.55	1327.63	3	-0.271899	27.1652
	A0A0R4IJ08;A0A0D9SGF6;A0A0P7VEP4;A0A0S7GKE8;A0A0S7GMT1;A0A0S7GQA6;A0A1A7WGD9;A0A1A7Z4A6;A0A1A8D2Q6;A0A1A8D8C3;A0A1A8GCR2;A0A1A8I584;A0A1A8KR84;A0A1A8MAY9;A0A1A8QC83;A0A1A8SFC1;A0A1A8UI02;A0A060XII9;A0A060XJX9;A0A087XQU7;A0A146Q523;A0A146Z4H1;A0A146Z4K2;A0A146Z4L3;A0A146Z4P1;A0A146Z5L2;A0A146Z6F5;F1R443;F1R446;G3Q393;G3Q398;H2MBY2;H2UIA9;H2UIB0;H2UIB1;H3C0G3;H3CBT9;M4A8R0;Q4T9R4;Q566W8;Q13813;W5KT…	9.5342	1.23316	EQLMASDDFGR		57.64	634.784	1267.55	2	1.9613	56.4104
	A0A0R4IJ08;A0A0D9SGF6;A0A0P7VEP4;A0A0S7GKE8;A0A0S7GMT1;A0A0S7GQA6;A0A1A7WGD9;A0A1A7Z4A6;A0A1A8D2Q6;A0A1A8D8C3;A0A1A8GCR2;A0A1A8I584;A0A1A8KR84;A0A1A8MAY9;A0A1A8QC83;A0A1A8SFC1;A0A1A8UI02;A0A060XII9;A0A060XJX9;A0A087XQU7;A0A146Q523;A0A146Z4H1;A0A146Z4K2;A0A146Z4L3;A0A146Z4P1;A0A146Z5L2;A0A146Z6F5;F1R443;F1R446;G3Q393;G3Q398;H2MBY2;H2UIA9;H2UIB0;H2UIB1;H3C0G3;H3CBT9;M4A8R0;Q4T9R4;Q566W8;Q13813;W5KT…	0.0416343	6.13441	EKEQLMASDDFGRDLASVQALLR		57.25	648.836	2591.31	4	5.12752	164.992
	A0A0R4IJ08;A0A0P7VEP4;A0A0S7GKQ9;A0A0S7GMT1;A0A0S7GRJ6;A0A1A7WGD9;A0A1A7Z4A6;A0A1A8D2Q6;A0A1A8D8C3;A0A1A8GCR2;A0A1A8I584;A0A1A8KR84;A0A1A8MAY9;A0A1A8QC83;A0A1A8SFC1;A0A1A8UI02;A0A060XII9;A0A087XQU7;A0A146Q523;A0A146Z4H1;A0A146Z4K2;A0A146Z4L3;A0A146Z4P1;A0A146Z5L2;A0A146Z6F5;A0A146Z650;F1R443;F1R446;G3Q393;G3Q398;H2UIA9;H2UIB0;H2UIB1;H3C0G3;H3CBT9;I3JZ89;I3JZ90;M4A8R0;Q4T9R4;Q4T9R5;W5KTF3;W5KTG2;W…	1.03818	313.195	RAALEDSFHLQQFFR		57.22	466.997	1863.96	4	9.12968	123.824
	A0A0R4IJ08;A0A0D9SGF6;A0A0P7V2T7;A0A0P7VEP4;A0A0S7GFQ8;A0A0S7GFR3;A0A0S7GFS1;A0A0S7GFS2;A0A0S7GFS3;A0A0S7GFT9;A0A0S7GG64;A0A0S7GGW2;A0A0S7GGW7;A0A0S7GKU3;A0A0S7GLM7;A0A0S7GNH5;A0A1A7WGD9;A0A1A7Z4A6;A0A1A8AIC9;A0A1A8DRB6;A0A1A8GCR2;A0A1A8KF62;A0A1A8MAY9;A0A1A8MXE6;A0A1A8QNY9;A0A1A8RNY5;A0A1A8SFC1;A0A1A8UI02;A0A060XII9;A0A060XJX9;A0A087XQU7;A0A146NIL5;A0A146NIU7;A0A146NJR6;A0A146Q523;A0A146Z4H1;A0A…	176.124	1.01947	SKLGESQTLQQFSR		57.05	804.917	1607.82	2	-6.37406	53.0722
	A0A0R4IJ08;A0A0D9SGF6;A0A0P7V2T7;A0A0P7VEP4;A0A0S7GKE8;A0A0S7GMT1;A0A0S7GQA6;A0A1A7WGD9;A0A1A7Z4A6;A0A1A8D2Q6;A0A1A8D8C3;A0A1A8GCR2;A0A1A8I584;A0A1A8KR84;A0A1A8MAY9;A0A1A8QC83;A0A1A8SFC1;A0A1A8UI02;A0A060XII9;A0A060XJX9;A0A087XQU7;A0A146Q523;A0A146Z4H1;A0A146Z4K2;A0A146Z4L3;A0A146Z4P1;A0A146Z5L2;A0A146Z6F5;F1R443;F1R446;H2UIA9;H2UIB0;H2UIB1;I3JZ89;I3JZ90;M4A8R0;Q4T9R4;Q4T9R5;Q566W8;Q13813;W5KTF3;…	1.06504	1.20015	FNRDVDETISWIK		56.12	541.613	1621.82	3	3.67186	98.3523
	A0A0R4IJ08;A0A0D9SGF6;A0A0P7V2T7;A0A0S7GFR3;A0A0S7GFS1;A0A0S7GFS2;A0A0S7GFS3;A0A0S7GG64;A0A0S7GGW2;A0A0S7GGW7;A0A0S7GKU3;A0A0S7GLM7;A0A0S7GNH5;A0A1A7WGD9;A0A1A7Z4A6;A0A1A8AIC9;A0A1A8DRB6;A0A1A8GCR2;A0A1A8MAY9;A0A1A8MXE6;A0A1A8QNY9;A0A1A8RNY5;A0A1A8SFC1;A0A1A8UI02;A0A060XII9;A0A060XJX9;A0A087XQU7;A0A146NIL5;A0A146NIU7;A0A146NJR6;A0A146Q523;A0A146Z4H1;A0A146Z4J7;A0A146Z4K2;A0A146Z4L3;A0A146Z4P1;A0A…	377.696	18.7436	DADETKEWIEEK		55.6	498.234	1491.68	3	7.33982	44.8114
	A0A0R4IJ08;A0A060XII9;A0A087XQU7;F1R443;F1R445;F1R446;M4A8R0;Q56A42	0.898077	1.15362	LLEAQDHFR		53.96	376.865	1127.57	3	3.64901	40.0654
	A0A0R4IJ08;A0A0D9SGF6;A0A0P7VEP4;A0A0S7GKE8;A0A0S7GMT1;A0A0S7GQA6;A0A1A7WGD9;A0A1A7Z4A6;A0A1A8D2Q6;A0A1A8D8C3;A0A1A8GCR2;A0A1A8I584;A0A1A8KR84;A0A1A8MAY9;A0A1A8QC83;A0A1A8SFC1;A0A1A8UI02;A0A060XII9;A0A060XJX9;A0A087XQU7;A0A146Q523;A0A146Z4H1;A0A146Z4K2;A0A146Z4L3;A0A146Z4P1;A0A146Z5L2;A0A146Z6F5;F1R443;F1R446;G3Q393;G3Q398;H2MBY2;H2UIA9;H2UIB0;H2UIB1;H3C0G3;H3CBT9;M4A8R0;Q4T9R4;Q566W8;Q13813;W5KT…	0.13822	0.0380785	EQLMASDDFGRDLASVQALLR		53.67	779.066	2334.18	3	7.43772	168.006
	A0A0R4IJ08;A0A0P7VEP4;A0A0S7GFR3;A0A0S7GFS1;A0A0S7GFS2;A0A0S7GFS3;A0A0S7GG64;A0A0S7GGW2;A0A0S7GGW7;A0A0S7GKU3;A0A0S7GLM7;A0A0S7GNH5;A0A1A7WGD9;A0A1A7Z4A6;A0A1A8AIC9;A0A1A8DRB6;A0A1A8GCR2;A0A1A8KF62;A0A1A8MAY9;A0A1A8MXE6;A0A1A8QNY9;A0A1A8RNY5;A0A1A8SFC1;A0A1A8UI02;A0A060XII9;A0A060XJX9;A0A087XQU7;A0A146NIL5;A0A146NIU7;A0A146NJR6;A0A146Q523;A0A146Z4H1;A0A146Z4J7;A0A146Z4K2;A0A146Z4L3;A0A146Z4P1;A0A…	7.67321	210.65	LIQSHPEAVDDIQEK		52.66	861.44	1720.86	2	2.68113	42.2016
	A0A0R4IJ08;A0A0D9SGF6;A0A0P7V2T7;A0A0P7VEP4;A0A0S7GFR3;A0A0S7GFS2;A0A0S7GG64;A0A0S7GKU3;A0A0S7GLM7;A0A1A7WGD9;A0A1A7Z4A6;A0A1A8D2Q6;A0A1A8D8C3;A0A1A8GCR2;A0A1A8I584;A0A1A8KR84;A0A1A8MAY9;A0A1A8QC83;A0A1A8SFC1;A0A1A8UI02;A0A060XII9;A0A060XJX9;A0A087XQU7;A0A146NJR6;A0A146Q523;A0A146Z4H1;A0A146Z4J7;A0A146Z4K2;A0A146Z4L3;A0A146Z4P1;A0A146Z5L2;A0A146Z6F5;A0A146Z650;F1R443;F1R446;G3Q393;G3Q398;H2MBY2;H…	1.0417	0.0543832	LREANQQQQFNR		52.37	511.262	1530.76	3	-4.27043	20.2292
	A0A0R4IJ08;A0A0D9SGF6;A0A0P7V2T7;A0A0P7VEP4;A0A0S7GKE8;A0A0S7GMT1;A0A0S7GQA6;A0A1A7WGD9;A0A1A7Z4A6;A0A1A8D2Q6;A0A1A8D8C3;A0A1A8GCR2;A0A1A8I584;A0A1A8KR84;A0A1A8MAY9;A0A1A8QC83;A0A1A8SFC1;A0A1A8UI02;A0A060XII9;A0A060XJX9;A0A087XQU7;A0A146Q523;A0A146Z4H1;A0A146Z4K2;A0A146Z4L3;A0A146Z4P1;A0A146Z5L2;A0A146Z6F5;F1R443;F1R446;G3Q393;G3Q398;H2UIA9;H2UIB0;H2UIB1;H3C0G3;H3CBT9;I3JZ89;I3JZ90;M4A8R0;Q4T9R4;…	0.0367097	0.749109	DVDETISWIK		51.1	603.309	1204.6	2	2.06903	95.814
	A0A0R4IJ08;A0A0D9SGF6;A0A0P7VEP4;A0A0S7GFR3;A0A0S7GFS2;A0A0S7GG64;A0A0S7GKU3;A0A0S7GLM7;A0A1A7WGD9;A0A1A7Z4A6;A0A1A8D2Q6;A0A1A8D8C3;A0A1A8GCR2;A0A1A8I584;A0A1A8KR84;A0A1A8MAY9;A0A1A8QC83;A0A1A8SFC1;A0A1A8UI02;A0A060XII9;A0A060XJX9;A0A087XQU7;A0A146NJR6;A0A146Q523;A0A146Z4H1;A0A146Z4J7;A0A146Z4K2;A0A146Z4L3;A0A146Z4P1;A0A146Z5L2;A0A146Z6F5;A0A146Z650;F1R443;F1R446;G3Q393;G3Q398;H2UIA9;H2UIB0;H2UIB…	1.30642	0.821557	LLEATELK		50.6	458.772	915.529	2	-0.816887	51.8015
	A0A0R4IJ08;A0A0P7VEP4;A0A060XII9;A0A060XJX9;F1R443;F1R446;G3Q393;G3Q398;H2UIA9;H2UIB0;H2UIB1;H3C0G3;H3CBT9;I3JZ89;I3JZ90;Q4T9R4;W5KTF3;W5KTG2;W5MFM2;W5MFP4	0.837064	1.10897	LLVSSEDYGRDLTGVQNLR		48.03	712.376	2134.11	3	2.65968	98.3523
	A0A0R4IJ08;A0A0D9SGF6;A0A0P7V2T7;A0A0P7VEP4;A0A0S7GFQ2;A0A0S7GFQ8;A0A0S7GFR3;A0A0S7GFS1;A0A0S7GFS2;A0A0S7GFS3;A0A0S7GG64;A0A0S7GGW2;A0A0S7GGW7;A0A0S7GI92;A0A0S7GKU3;A0A0S7GLM7;A0A0S7GLW5;A0A0S7GNH5;A0A1A7WGD9;A0A1A7Z4A6;A0A1A8AIC9;A0A1A8DRB6;A0A1A8GCR2;A0A1A8KF62;A0A1A8MAY9;A0A1A8MXE6;A0A1A8QNY9;A0A1A8RNY5;A0A1A8SFC1;A0A1A8UI02;A0A060XII9;A0A060XJX9;A0A087XQU7;A0A146NIL5;A0A146NIU7;A0A146NJR6;A0A…	0.953975	0.827656	DLTGVQNLR		47.62	508.28	1014.55	2	-4.07736	50.4624
	A0A0R4IJ08;A0A0D9SGF6;A0A0P7V2T7;A0A0P7VEP4;A0A0S7GFQ8;A0A0S7GFR3;A0A0S7GFS1;A0A0S7GFS2;A0A0S7GFS3;A0A0S7GFT9;A0A0S7GG64;A0A0S7GGW2;A0A0S7GGW7;A0A0S7GKU3;A0A0S7GLM7;A0A0S7GNH5;A0A1A7WGD9;A0A1A7Z4A6;A0A1A8AIC9;A0A1A8DRB6;A0A1A8GCR2;A0A1A8KF62;A0A1A8MAY9;A0A1A8MXE6;A0A1A8QNY9;A0A1A8RNY5;A0A1A8SFC1;A0A1A8UI02;A0A060XII9;A0A060XJX9;A0A087XQU7;A0A146NIL5;A0A146NIU7;A0A146NJR6;A0A146Q523;A0A146Z4H1;A0A…	11.0449	93.973	SKLGESQTLQQFSR		46.81	536.945	1607.81	3	-10.3331	53.0722
	A0A0R4IJ08;A0A0S7GKE8;A0A0S7GKV9;A0A0S7GMT1;A0A0S7GPJ4;A0A0S7GQA6;A0A0S7GRJ6;A0A1A7WGD9;A0A1A7Z4A6;A0A1A8D2Q6;A0A1A8D8C3;A0A1A8GCR2;A0A1A8I584;A0A1A8KR84;A0A1A8MAY9;A0A1A8QC83;A0A1A8SFC1;A0A1A8UI02;A0A060XII9;A0A087XQU7;A0A146Q523;A0A146Z4H1;A0A146Z4K2;A0A146Z4L3;A0A146Z4P1;A0A146Z5L2;A0A146Z6F5;F1R443;F1R446;H2MBY2;H2UIA9;H2UIB0;H2UIB1;H3C0G3;H3CBT9;M4A8R0;Q4T9R4;Q4T9R5;Q566W8;W5KTF3;W5KTG2;W5MF…	1.85005	1.01947	LWDLLLQK		39.08	514.813	1027.61	2	0.50593	123.824
	A0A0R4IJ08;A0A0D9SGF6;A0A0P7V2T7;A0A0P7VEP4;A0A0S7GFS1;A0A0S7GFS2;A0A0S7GFS3;A0A0S7GG64;A0A0S7GGW2;A0A0S7GGW7;A0A0S7GI92;A0A0S7GKU3;A0A0S7GLM7;A0A0S7GLW5;A0A060XII9;A0A087XQU7;A0A146NIL5;A0A146NIU7;A0A146NJR6;A0A146Q523;A0A146Z4J7;A0A146Z4K2;A0A146Z4L3;A0A146Z4P1;A0A146Z6F5;A0A146Z650;C0PUV6;F1R443;F1R446;G3Q393;G3Q398;H2MBY2;H2UGD2;H2UIA9;H2UIB0;H2UIB1;H3C0G3;H3CBT9;I3JZ89;I3JZ90;M4A8R0;Q4T9R4;Q…	1.20725	0.827429	ENSLKTDDYGR		38.31	433.213	1296.62	3	19.998	19.9438
	A0A0R4IJ08;A0A0D9SGF6;A0A0P7V2T7;A0A0P7VEP4;A0A0S7GFQ8;A0A0S7GFR3;A0A0S7GFS1;A0A0S7GFS2;A0A0S7GFS3;A0A0S7GFT9;A0A0S7GG64;A0A0S7GGW2;A0A0S7GGW7;A0A0S7GKU3;A0A0S7GLM7;A0A0S7GNH5;A0A1A7WGD9;A0A1A7Z4A6;A0A1A8AIC9;A0A1A8DRB6;A0A1A8GCR2;A0A1A8KF62;A0A1A8MAY9;A0A1A8MXE6;A0A1A8QNY9;A0A1A8RNY5;A0A1A8SFC1;A0A1A8UI02;A0A060XII9;A0A060XJX9;A0A087XQU7;A0A146NIL5;A0A146NIU7;A0A146NJR6;A0A146Q523;A0A146Z4H1;A0A…	1.03591	0.81451	LGESQTLQQFSR		37.01	465.242	1392.7	3	2.45396	58.6754
	A0A0R4IJ08;A0A0D9SGF6;A0A0P7VEP4;A0A0S7GFS1;A0A0S7GFS2;A0A0S7GFS3;A0A0S7GG64;A0A0S7GGW2;A0A0S7GGW7;A0A0S7GI92;A0A0S7GKU3;A0A0S7GLM7;A0A0S7GLW5;A0A1A7WGD9;A0A1A7Z4A6;A0A1A8AIC9;A0A1A8DRB6;A0A1A8GCR2;A0A1A8KF62;A0A1A8MAY9;A0A1A8MXE6;A0A1A8QNY9;A0A1A8RNY5;A0A1A8SFC1;A0A1A8UI02;A0A060XII9;A0A060XJX9;A0A087XQU7;A0A146NIL5;A0A146NIU7;A0A146NJR6;A0A146Q523;A0A146Z4J7;A0A146Z4K2;A0A146Z4L3;A0A146Z4P1;A0A…	1.53291	0.988724	KVEDLFLTFAK		36.93	655.857	1309.7	2	-23.1591	119.386
	A0A0R4IJ08;A0A0D9SGF6;A0A0P7V2T7;A0A0P7VEP4;A0A0S7GFR3;A0A0S7GFS2;A0A0S7GG64;A0A0S7GKU3;A0A0S7GLM7;A0A1A7WGD9;A0A1A7Z4A6;A0A1A8D2Q6;A0A1A8GCR2;A0A1A8I584;A0A1A8KR84;A0A1A8MAY9;A0A1A8SFC1;A0A060XII9;A0A060XJX9;A0A087XQU7;A0A146NIL5;A0A146NIU7;A0A146NJR6;A0A146Q523;A0A146Z4H1;A0A146Z4J7;A0A146Z4L3;A0A146Z4P1;A0A146Z5L2;A0A146Z6F5;A0A146Z650;F1R443;F1R446;G3Q393;G3Q398;H2MBY2;H2UIA9;H2UIB0;H2UIB1;H3…	1.12398	1.23248	GKDLIGVQNLLKK		36.53	357.226	1424.87	4	2.74437	80.7888
	A0A0R4IJ08;A0A0D9SGF6;A0A0P7V2T7;A0A0P7VEP4;A0A0S7GFQ8;A0A0S7GFR3;A0A0S7GFS1;A0A0S7GFS2;A0A0S7GFS3;A0A0S7GFT9;A0A0S7GG64;A0A0S7GGW2;A0A0S7GGW7;A0A0S7GKU3;A0A0S7GLM7;A0A0S7GNH5;A0A1A7WGD9;A0A1A7Z4A6;A0A1A8AIC9;A0A1A8DRB6;A0A1A8GCR2;A0A1A8KF62;A0A1A8MAY9;A0A1A8MXE6;A0A1A8QNY9;A0A1A8RNY5;A0A1A8SFC1;A0A1A8UI02;A0A060XII9;A0A060XJX9;A0A087XQU7;A0A146NIL5;A0A146NIU7;A0A146NJR6;A0A146Q523;A0A146Z4H1;A0A…	1.03818	173.829	KHEDFDKAINVQEEK		32.61	458.234	1828.91	4	4.44861	30.8362
A0A1A8SFC1	82	1.55246	1.01947	82
	A0A1A8SFC1;A0A0D9SGF6;A0A0R4IJ08;A0A0S7GFR3;A0A0S7GFS1;A0A0S7GFS2;A0A0S7GFS3;A0A0S7GG64;A0A0S7GGW2;A0A0S7GGW7;A0A0S7GKU3;A0A0S7GLM7;A0A0S7GNH5;A0A1A7WGD9;A0A1A7Z4A6;A0A1A8GCR2;A0A1A8MAY9;A0A1A8MXE6;A0A1A8QNY9;A0A1A8RNY5;A0A060XII9;A0A060XJX9;A0A087XQU7;A0A146NIL5;A0A146NIU7;A0A146NJR6;A0A146Q523;A0A146Z4H1;A0A146Z4J7;A0A146Z4K2;A0A146Z4L3;A0A146Z4P1;A0A146Z5L2;A0A146Z6F5;A0A146Z650;F1QDX2;F1R443;…	1.10634	0.946459	NQALNTDNYGHDLASVQALQR		127.8	776.717	2327.13	3	-0.924291	82.1301
	A0A1A8SFC1;A0A0P7VEP4;A0A0S7GFQ8;A0A0S7GFR3;A0A0S7GFS1;A0A0S7GFS2;A0A0S7GFS3;A0A0S7GFT9;A0A0S7GG64;A0A0S7GGW2;A0A0S7GGW7;A0A0S7GKU3;A0A0S7GLM7;A0A0S7GNH5;A0A1A7WGD9;A0A1A7Z4A6;A0A1A8AIC9;A0A1A8DRB6;A0A1A8GCR2;A0A1A8KF62;A0A1A8MAY9;A0A1A8MXE6;A0A1A8QNY9;A0A1A8RNY5;A0A1A8UI02;A0A060XII9;A0A060XJX9;A0A087XQU7;I3JZ89;I3JZ90;M4A8R0;W5KTF3;W5KTG2	0.0290227	34.4391	AGTFQAFEQFGQQLLAR		122.22	956.489	1910.96	2	1.61374	169.873
	A0A1A8SFC1;A0A0P7V2T7;A0A0S7GFR3;A0A0S7GFS1;A0A0S7GFS2;A0A0S7GFS3;A0A0S7GG64;A0A0S7GGW2;A0A0S7GGW7;A0A0S7GKU3;A0A0S7GLM7;A0A0S7GNH5;A0A1A7WGD9;A0A1A7Z4A6;A0A1A8AIC9;A0A1A8DRB6;A0A1A8GCR2;A0A1A8KF62;A0A1A8MAY9;A0A1A8MXE6;A0A1A8QNY9;A0A1A8RNY5;A0A1A8UI02;A0A060XJX9;A0A087XQU7;A0A146NIL5;A0A146NIU7;A0A146NJR6;A0A146Q523;A0A146Z4H1;A0A146Z4J7;A0A146Z4K2;A0A146Z4L3;A0A146Z4P1;A0A146Z5L2;A0A146Z6F5;A0A…	0.000970093	0.480679	GLVSSEELAKDVTGAEALLER		115.99	729.722	2186.15	3	2.34333	162.693
	A0A1A8SFC1;A0A0R4IJ08;A0A0S7GFS1;A0A0S7GFS2;A0A0S7GFS3;A0A0S7GG64;A0A0S7GGW2;A0A0S7GGW7;A0A0S7GI92;A0A0S7GKU3;A0A0S7GLM7;A0A0S7GLW5;A0A1A7WGD9;A0A1A7Z4A6;A0A1A8AIC9;A0A1A8DRB6;A0A1A8GCR2;A0A1A8KF62;A0A1A8MAY9;A0A1A8MXE6;A0A1A8QNY9;A0A1A8RNY5;A0A1A8UI02;A0A060XII9;A0A060XJX9;A0A087XQU7;A0A146NIL5;A0A146NIU7;A0A146NJR6;A0A146Q523;A0A146Z4J7;A0A146Z4K2;A0A146Z4L3;A0A146Z4P1;A0A146Z6F5;A0A146Z650;F1R…	1.12788	1556.08	LNLVGSEDYGDTLAAVQGLLK		115.77	726.054	2175.14	3	0.603017	171.724
	A0A1A8SFC1;A0A0R4IJ08;A0A0S7GFS1;A0A0S7GFS2;A0A0S7GFS3;A0A0S7GG64;A0A0S7GGW2;A0A0S7GGW7;A0A0S7GI92;A0A0S7GKU3;A0A0S7GLM7;A0A0S7GLW5;A0A1A7WGD9;A0A1A7Z4A6;A0A1A8AIC9;A0A1A8DRB6;A0A1A8GCR2;A0A1A8KF62;A0A1A8MAY9;A0A1A8MXE6;A0A1A8QNY9;A0A1A8RNY5;A0A1A8UI02;A0A060XII9;A0A060XJX9;A0A087XQU7;A0A146NIL5;A0A146NIU7;A0A146NJR6;A0A146Q523;A0A146Z4J7;A0A146Z4K2;A0A146Z4L3;A0A146Z4P1;A0A146Z6F5;A0A146Z650;F1R…	16.1158	1.01947	LNLVGSEDYGDTLAAVQGLLK		109.97	1088.58	2175.15	2	6.71343	175.929
	A0A1A8SFC1;A0A0D9SGF6;A0A0P7V2T7;A0A0P7VEP4;A0A0R4IJ08;A0A0S7GFS1;A0A0S7GFS2;A0A0S7GFS3;A0A0S7GG64;A0A0S7GGW2;A0A0S7GGW7;A0A0S7GI92;A0A0S7GKU3;A0A0S7GLM7;A0A0S7GLW5;A0A1A7WGD9;A0A1A7Z4A6;A0A1A8AIC9;A0A1A8DRB6;A0A1A8GCR2;A0A1A8KF62;A0A1A8MAY9;A0A1A8MXE6;A0A1A8QNY9;A0A1A8RNY5;A0A1A8UI02;A0A1B0GV13;A0A060XII9;A0A060XJX9;A0A087XQU7;A0A146NIL5;A0A146NIU7;A0A146NJR6;A0A146Q523;A0A146Z4J7;A0A146Z4K2;A0A…	1.62303	0.582025	LDENSAFLQFNWK		109.63	806.398	1610.78	2	7.24726	133.8
	A0A1A8SFC1;A0A0P7V2T7;A0A0P7VEP4;A0A0R4IJ08;A0A0S7GKE8;A0A0S7GMT1;A0A0S7GQA6;A0A1A7WGD9;A0A1A7Z4A6;A0A1A8D2Q6;A0A1A8D8C3;A0A1A8GCR2;A0A1A8I584;A0A1A8KR84;A0A1A8MAY9;A0A1A8QC83;A0A1A8UI02;A0A060XII9;A0A060XJX9;A0A087XQU7;A0A146Q523;A0A146Z4H1;A0A146Z4K2;A0A146Z4L3;A0A146Z4P1;A0A146Z5L2;A0A146Z6F5;A0A146Z650;F1R443;F1R446;G3Q393;G3Q398;H2MBY2;I3JZ89;I3JZ90;M4A8R0;Q566W8;W5KTF3;W5KTG2;W5MFM2;W5MFP4	3.19093	1.85266	ALINADELANDVAGAEALLDR		107	718.709	2153.11	3	2.54416	185.541
	A0A1A8SFC1;A0A0D9SGF6;A0A0P7V2T7;A0A0P7VEP4;A0A0R4IJ08;A0A0S7GFS2;A0A0S7GFS3;A0A0S7GGW7;A0A0S7GI92;A0A0S7GKU3;A0A1A7WGD9;A0A1A7Z4A6;A0A1A8AIC9;A0A1A8DRB6;A0A1A8GCR2;A0A1A8KF62;A0A1A8MAY9;A0A1A8MXE6;A0A1A8QNY9;A0A1A8RNY5;A0A1A8UI02;A0A060XII9;A0A060XJX9;A0A087XQU7;A0A146NIU7;A0A146Q523;A0A146Z4J7;A0A146Z4L3;A0A146Z4P1;A0A146Z6F5;A0A146Z650;C0PUV6;F1R443;F1R445;F1R446;F8K8N3;G3Q393;G3Q398;H2MBY2;H2…	2.21306	2.37499	IEDLGAAMEEALILDNK		106.2	922.972	1843.93	2	5.60561	153.845
	A0A1A8SFC1;A0A1A7WGD9;A0A1A7Z4A6;A0A1A8D2Q6;A0A1A8GCR2;A0A1A8I584;A0A1A8KR84;A0A1A8MXE6;A0A1A8QNY9;A0A060XII9;A0A060XJX9;W5KTF3;W5KTG2	1042.5	684.201	EGALTNEEVGSDLEQVEVLQK		105.35	1144.07	2286.13	2	4.00149	109.237
	A0A1A8SFC1;A0A0D9SGF6;A0A0P7V2T7;A0A0P7VEP4;A0A0R4IJ08;A0A0S7GFS2;A0A0S7GFS3;A0A0S7GGW7;A0A0S7GI92;A0A0S7GKU3;A0A1A7WGD9;A0A1A7Z4A6;A0A1A8AIC9;A0A1A8DRB6;A0A1A8GCR2;A0A1A8KF62;A0A1A8MAY9;A0A1A8MXE6;A0A1A8QNY9;A0A1A8RNY5;A0A1A8UI02;A0A060XII9;A0A060XJX9;A0A087XQU7;A0A146NIU7;A0A146Q523;A0A146Z4J7;A0A146Z4L3;A0A146Z4P1;A0A146Z6F5;A0A146Z650;C0PUV6;F1R443;F1R445;F1R446;F8K8N3;G3Q393;G3Q398;H2MBY2;H2…	12.4474	0.768997	KIEDLGAAMEEALILDNK		99.23	658.351	1972.03	3	5.84731	152.693
	A0A1A8SFC1;A0A0D9SGF6;A0A0P7V2T7;A0A0P7VEP4;A0A0R4IJ08;A0A0S7GFR3;A0A0S7GFS2;A0A0S7GG64;A0A0S7GKU3;A0A0S7GLM7;A0A1A7WGD9;A0A1A7Z4A6;A0A1A8D2Q6;A0A1A8GCR2;A0A1A8I584;A0A1A8KR84;A0A1A8MXE6;A0A1A8QNY9;A0A060XII9;A0A060XJX9;A0A146NIL5;A0A146NIU7;A0A146NJR6;A0A146Q523;A0A146Z4H1;A0A146Z4J7;A0A146Z4K2;A0A146Z4L3;A0A146Z4P1;A0A146Z5L2;A0A146Z6F5;A0A146Z650;F1R443;F1R446;G3Q393;G3Q398;H2UIB0;H2UIB1;H3CBT…	1.03818	2427.31	QQVAPTDDETGKELVLALYDYQEK		96.33	918.458	2752.35	3	4.07101	131.026
	A0A1A8SFC1;A0A0D9SGF6;A0A0P7V2T7;A0A0R4IJ08;A0A0S7GFR3;A0A0S7GFS2;A0A0S7GG64;A0A0S7GKU3;A0A0S7GLM7;A0A1A7WGD9;A0A1A7Z4A6;A0A1A8D2Q6;A0A1A8D8C3;A0A1A8GCR2;A0A1A8I584;A0A1A8KR84;A0A1A8MAY9;A0A1A8RNY5;A0A060XII9;A0A060XJX9;A0A087XQU7;F1R443;F1R446;G3Q393;G3Q398;H2MBY2;I3JZ89;I3JZ90;M4A8R0;Q13813;W5KTF3;W5KTG2;W5MFM2;W5MFP4	1.03818	1.24516	RQDLEDSLQAQQYFADANEAESWMR		95.41	1001.12	3000.34	3	4.19052	134.37
	A0A1A8SFC1;A0A0R4IJ08;A0A0S7GFQ2;A0A0S7GFQ8;A0A0S7GFR3;A0A0S7GFS1;A0A0S7GFS2;A0A0S7GFS3;A0A0S7GG64;A0A0S7GGW2;A0A0S7GGW7;A0A0S7GI92;A0A0S7GKU3;A0A0S7GLM7;A0A0S7GLW5;A0A0S7GNH5;A0A1A7WGD9;A0A1A7Z4A6;A0A1A8AIC9;A0A1A8DRB6;A0A1A8GCR2;A0A1A8KF62;A0A1A8MAY9;A0A1A8MXE6;A0A1A8QNY9;A0A1A8RNY5;A0A1A8UI02;A0A060XII9;A0A087XQU7;A0A146NIL5;A0A146NIU7;A0A146NJR6;A0A146Q523;A0A146Z4H1;A0A146Z4J7;A0A146Z4K2;A0A…	1.47246	0.92686	GVIDTGNALIQR		93.15	628.853	1255.69	2	1.68535	71.0409
	A0A1A8SFC1;A0A0P7VEP4;A0A0S7GFQ8;A0A0S7GFR3;A0A0S7GFS1;A0A0S7GFS2;A0A0S7GFS3;A0A0S7GFT9;A0A0S7GG64;A0A0S7GGW2;A0A0S7GGW7;A0A0S7GKU3;A0A0S7GLM7;A0A0S7GNH5;A0A1A7WGD9;A0A1A7Z4A6;A0A1A8AIC9;A0A1A8DRB6;A0A1A8GCR2;A0A1A8KF62;A0A1A8MAY9;A0A1A8MXE6;A0A1A8QNY9;A0A1A8RNY5;A0A1A8UI02;A0A060XII9;A0A060XJX9;A0A087XQU7;I3JZ89;I3JZ90;M4A8R0;W5KTF3;W5KTG2	71.7992	2.98086	AGTFQAFEQFGQQLLAR		92.56	637.998	1910.97	3	6.14205	169.011
	A0A1A8SFC1;A0A0D9SGF6;A0A0P7V2T7;A0A0P7VEP4;A0A0R4IJ08;A0A1A7WGD9;A0A1A7Z4A6;A0A1A8D2Q6;A0A1A8D8C3;A0A1A8GCR2;A0A1A8I584;A0A1A8KR84;A0A1A8MAY9;A0A1A8QC83;A0A1A8UI02;A0A060XII9;A0A060XJX9;A0A087XQU7;A0A146Q523;A0A146Z4H1;A0A146Z4J7;A0A146Z4K2;A0A146Z4L3;A0A146Z4P1;A0A146Z5L2;A0A146Z6F5;A0A146Z650;F1R443;F1R446;G3Q393;G3Q398;H2MBY2;H2UIA9;H2UIB0;H2UIB1;H3C0G3;H3CBT9;I3JZ89;I3JZ90;M4A8R0;Q4T9R4;Q4T9…	1.02938	1.07542	HQAFEAELSANQSR		92.43	529.923	1586.75	3	4.18109	40.423
	A0A1A8SFC1;A0A0D9SFH4;A0A0D9SGF6;A0A0P7V2T7;A0A0P7VEP4;A0A0R4IJ08;A0A0S7GFS2;A0A0S7GFS3;A0A0S7GGW7;A0A0S7GI92;A0A0S7GKU3;A0A1A7WGD9;A0A1A7Z4A6;A0A1A8AIC9;A0A1A8DRB6;A0A1A8GCR2;A0A1A8KF62;A0A1A8MAY9;A0A1A8MXE6;A0A1A8QNY9;A0A1A8RNY5;A0A1A8UI02;A0A060XII9;A0A060XJX9;A0A087XQU7;A0A146NIU7;A0A146Q523;A0A146Z4J7;A0A146Z4L3;A0A146Z4P1;A0A146Z650;C0PUV6;F1R443;F1R445;F1R446;F8K8N3;G3Q393;G3Q398;H2MBY2;H2…	1.80805	0.865306	SSEEIESAFR		88.75	577.771	1153.53	2	-1.61916	51.3788
	A0A1A8SFC1;A0A0P7VEP4;A0A0R4IJ08;A0A0S7GFS1;A0A0S7GFS2;A0A0S7GFS3;A0A0S7GG64;A0A0S7GGW2;A0A0S7GGW7;A0A0S7GI92;A0A0S7GKU3;A0A0S7GLM7;A0A0S7GLW5;A0A1A7WGD9;A0A1A7Z4A6;A0A1A8AIC9;A0A1A8DRB6;A0A1A8GCR2;A0A1A8KF62;A0A1A8MAY9;A0A1A8MXE6;A0A1A8QNY9;A0A1A8RNY5;A0A1A8UI02;A0A060XII9;A0A060XJX9;A0A087XQU7;A0A146NIL5;A0A146NIU7;A0A146NJR6;A0A146Q523;A0A146Z4J7;A0A146Z4K2;A0A146Z4L3;A0A146Z4P1;A0A146Z6F5;A0A…	145.971	0.577478	QETFDAGLQAFQQEGITNITALK		88.67	841.766	2522.28	3	3.03161	153.268
	A0A1A8SFC1;A0A0D9SGF6;A0A0P7VEP4;A0A0R4IJ08;A0A0S7GFS2;A0A0S7GFS3;A0A0S7GGW7;A0A0S7GI92;A0A0S7GKU3;A0A1A7WGD9;A0A1A7Z4A6;A0A1A8AIC9;A0A1A8DRB6;A0A1A8GCR2;A0A1A8KF62;A0A1A8MAY9;A0A1A8MXE6;A0A1A8QNY9;A0A1A8RNY5;A0A1A8UI02;A0A060XII9;A0A060XJX9;A0A087XQU7;A0A146NIU7;A0A146Q523;A0A146Z4J7;A0A146Z4L3;A0A146Z4P1;A0A146Z6F5;A0A146Z650;C0PUV6;F1R443;F1R445;F1R446;F8K8N3;G3Q393;G3Q398;H2MBY2;H2UGD2;H3C0G3…	0.233289	0.00119199	YTEHSTVGLAQQWDQLDQLGMR		87.43	859.415	2575.22	3	5.41344	132.586
	A0A1A8SFC1;A0A0D9SGF6;A0A0P7V2T7;A0A0R4IJ08;A0A1A7WGD9;A0A1A7Z4A6;A0A1A8D2Q6;A0A1A8GCR2;A0A1A8I584;A0A1A8KR84;A0A1A8MXE6;A0A1A8QNY9;A0A060XII9;A0A060XJX9;F1R443;F1R446;G3Q393;G3Q398;Q13813;W5KTF3;W5KTG2	1.54542	1.00188	EANELQQWINEK		84.85	751.369	1500.72	2	1.77925	86.718
	A0A1A8SFC1;A0A0D9SGF6;A0A0P7VEP4;A0A0R4IJ08;A0A0S7GFQ8;A0A0S7GFR3;A0A0S7GFS1;A0A0S7GFS2;A0A0S7GFS3;A0A0S7GFT9;A0A0S7GG64;A0A0S7GGW2;A0A0S7GGW7;A0A0S7GKU3;A0A0S7GLM7;A0A0S7GNH5;A0A1A7WGD9;A0A1A7Z4A6;A0A1A8AIC9;A0A1A8DRB6;A0A1A8GCR2;A0A1A8KF62;A0A1A8MAY9;A0A1A8MXE6;A0A1A8QNY9;A0A1A8RNY5;A0A1A8UI02;A0A060XII9;A0A060XJX9;A0A087XQU7;A0A146NIL5;A0A146NIU7;A0A146NJR6;A0A146Q523;A0A146Z4H1;A0A146Z4J7;A0A…	639.152	1.0256	DCEQAENWMAAR	[2] Methylthio (C)	84.18	735.286	1468.56	2	4.578	79.8609
	A0A1A8SFC1;A0A0R4IJ08;A0A0S7GFR3;A0A0S7GFS2;A0A0S7GG64;A0A0S7GKU3;A0A0S7GLM7;A0A1A7WGD9;A0A1A7Z4A6;A0A1A8D2Q6;A0A1A8D8C3;A0A1A8GCR2;A0A1A8I584;A0A1A8KR84;A0A1A8QNY9;A0A060XII9;A0A060XJX9;A0A087XQU7;A0A146NIL5;A0A146NIU7;A0A146NJR6;A0A146Q523;A0A146Z4H1;A0A146Z4J7;A0A146Z4K2;A0A146Z4L3;A0A146Z4P1;A0A146Z5L2;A0A146Z6F5;A0A146Z650;F1R443;F1R446;H2UIA9;H2UIB0;H2UIB1;M4A8R0;W5KTF3;W5KTG2	1.21813	0.849124	EKEPIVGSPDYGKDEDSAEALLK		83.57	623.313	2489.22	4	0.933673	82.5533
	A0A1A8SFC1;A0A0D9SGF6;A0A0P7V2T7;A0A0R4IJ08;A0A0S7GFR3;A0A0S7GFS1;A0A0S7GFS2;A0A0S7GFS3;A0A0S7GG64;A0A0S7GGW2;A0A0S7GGW7;A0A0S7GKU3;A0A0S7GLM7;A0A0S7GNH5;A0A1A7WGD9;A0A1A7Z4A6;A0A1A8AIC9;A0A1A8DRB6;A0A1A8GCR2;A0A1A8MAY9;A0A1A8MXE6;A0A1A8QNY9;A0A1A8RNY5;A0A1A8UI02;A0A060XII9;A0A060XJX9;A0A087XQU7;A0A146NIL5;A0A146NIU7;A0A146NJR6;A0A146Q523;A0A146Z4H1;A0A146Z4J7;A0A146Z4K2;A0A146Z4L3;A0A146Z4P1;A0A…	342.749	49.8991	DADETKEWIEEK		83.48	746.846	1491.68	2	5.32486	44.8114
	A0A1A8SFC1;A0A0D9SGF6;A0A0P7V2T7;A0A0P7VEP4;A0A0R4IJ08;A0A0S7GFQ8;A0A0S7GFR3;A0A0S7GFS1;A0A0S7GFS2;A0A0S7GFS3;A0A0S7GFT9;A0A0S7GG64;A0A0S7GGW2;A0A0S7GGW7;A0A0S7GKU3;A0A0S7GLM7;A0A0S7GNH5;A0A1A7WGD9;A0A1A7Z4A6;A0A1A8AIC9;A0A1A8DRB6;A0A1A8GCR2;A0A1A8KF62;A0A1A8MAY9;A0A1A8MXE6;A0A1A8QNY9;A0A1A8RNY5;A0A1A8UI02;A0A060XII9;A0A060XJX9;A0A087XQU7;A0A146NIL5;A0A146NIU7;A0A146NJR6;A0A146Q523;A0A146Z4H1;A0A…	1.58256	1.52869	DVTGAEALLER		82.72	587.31	1172.6	2	3.83635	77.9559
	A0A1A8SFC1;A0A0D9SGF6;A0A0P7V2T7;A0A0P7VEP4;A0A0R4IJ08;A0A1A7WGD9;A0A1A7Z4A6;A0A1A8D2Q6;A0A1A8D8C3;A0A1A8GCR2;A0A1A8I584;A0A1A8KR84;A0A1A8MAY9;A0A1A8QC83;A0A1A8UI02;A0A060XII9;A0A060XJX9;A0A087XQU7;A0A146Q523;A0A146Z4H1;A0A146Z4J7;A0A146Z4K2;A0A146Z4L3;A0A146Z4P1;A0A146Z5L2;A0A146Z6F5;A0A146Z650;F1R443;F1R446;G3Q393;G3Q398;H2MBY2;H2UIA9;H2UIB0;H2UIB1;H3C0G3;H3CBT9;I3JZ89;I3JZ90;M4A8R0;Q4T9R4;Q4T9…	1.36222	1.05396	HQAFEAELSANQSR		82.34	794.38	1586.75	2	3.32603	40.4952
	A0A1A8SFC1;A0A0D9SGF6;A0A0P7V2T7;A0A0P7VEP4;A0A0R4IJ08;A0A0S7GKE8;A0A0S7GMT1;A0A0S7GQA6;A0A1A7WGD9;A0A1A7Z4A6;A0A1A8D2Q6;A0A1A8D8C3;A0A1A8GCR2;A0A1A8I584;A0A1A8KR84;A0A1A8MAY9;A0A1A8QC83;A0A1A8UI02;A0A060XII9;A0A060XJX9;A0A087XQU7;A0A146Q523;A0A146Z4H1;A0A146Z4K2;A0A146Z4L3;A0A146Z4P1;A0A146Z5L2;A0A146Z6F5;F1R443;F1R446;G3Q393;G3Q398;H2MBY2;H2UIA9;H2UIB0;H2UIB1;H3C0G3;H3CBT9;I3JZ89;I3JZ90;M4A8R0;…	13.9598	12.7181	DLASVQALLR		82.27	543.319	1084.62	2	4.01573	111.985
	A0A1A8SFC1;A0A0R4IJ08;A0A0S7GFS1;A0A0S7GFS2;A0A0S7GFS3;A0A0S7GG64;A0A0S7GGW2;A0A0S7GGW7;A0A0S7GI92;A0A0S7GKU3;A0A0S7GLM7;A0A0S7GLW5;A0A1A7WGD9;A0A1A7Z4A6;A0A1A8AIC9;A0A1A8DRB6;A0A1A8GCR2;A0A1A8KF62;A0A1A8MAY9;A0A1A8MXE6;A0A1A8QNY9;A0A1A8RNY5;A0A1A8UI02;A0A060XII9;A0A060XJX9;A0A087XQU7;A0A146NIL5;A0A146NIU7;A0A146NJR6;A0A146Q523;A0A146Z4J7;A0A146Z4L3;A0A146Z4P1;A0A146Z6F5;A0A146Z650;C0PUV6;F1R443;…	0.00243808	1.43642	QETFDAGLQAFQQEGITNITALKDQLLAAK		81.55	1088.24	3261.69	3	0.395662	190.428
	A0A1A8SFC1;A0A0R4IJ08;A0A0S7GKE8;A0A0S7GKV9;A0A0S7GQU7;A0A1A8D2Q6;A0A1A8D8C3;A0A1A8GCR2;A0A1A8I584;A0A1A8KR84;A0A1A8MAY9;A0A1A8QC83;A0A1A8UI02;A0A060XII9;A0A060XJX9;A0A087XQU7;A0A146Z4H1;A0A146Z4K2;A0A146Z4L3;A0A146Z4P1;A0A146Z5L2;A0A146Z6F5;F1R443;F1R446;G3Q393;G3Q398;H2MBY2;I3JZ89;I3JZ90;M4A8R0;Q32P38;Q566W8;W5KTF3;W5KTG2;W5MFM2;W5MFP4	3.59038	0.31157	DADELEKWIQEK		80.79	752.37	1502.73	2	-2.72521	95.8845
	A0A1A8SFC1;A0A0D9SGF6;A0A0P7V2T7;A0A0P7VEP4;A0A0R4IJ08;A0A0S7GFS1;A0A0S7GFS2;A0A0S7GFS3;A0A0S7GG64;A0A0S7GGW2;A0A0S7GGW7;A0A0S7GI92;A0A0S7GKU3;A0A0S7GLM7;A0A0S7GLW5;A0A1A7WGD9;A0A1A7Z4A6;A0A1A8AIC9;A0A1A8DRB6;A0A1A8GCR2;A0A1A8KF62;A0A1A8MAY9;A0A1A8MXE6;A0A1A8QNY9;A0A1A8RNY5;A0A1A8UI02;A0A060XII9;A0A060XJX9;A0A087XQU7;A0A146NIL5;A0A146NIU7;A0A146NJR6;A0A146Q523;A0A146Z4J7;A0A146Z4K2;A0A146Z4L3;A0A…	3.42187	0.776863	ADVVESWIGEK		80.45	616.814	1231.61	2	3.30561	81.7777
	A0A1A8SFC1;A0A0S7GFS2;A0A0S7GFS3;A0A0S7GGW7;A0A0S7GI92;A0A0S7GKU3;A0A1A7WGD9;A0A1A7Z4A6;A0A1A8AIC9;A0A1A8DRB6;A0A1A8GCR2;A0A1A8KF62;A0A1A8MAY9;A0A1A8MXE6;A0A1A8QNY9;A0A1A8RNY5;A0A1A8UI02;A0A060XII9;A0A060XJX9;A0A146NIU7;A0A146Q523;A0A146Z4J7;A0A146Z4L3;A0A146Z4P1;A0A146Z6F5;A0A146Z650;C0PUV6;F1R446;G3Q393;G3Q398;H2MBY2;H3C0G3;H3CBT9;I3JZ89;Q13813;W5KTG2;W5MFM2	3.63141	5.60988	TYLLDGSCMVEESGTLESQLEATKR	[8] Methylthio (C)	79.79	936.109	2805.3	3	4.90607	152.98
	A0A1A8SFC1;A0A0D9SGF6;A0A0P7V2T7;A0A0P7VEP4;A0A0R4IJ08;A0A0S7GKE8;A0A0S7GMT1;A0A0S7GQA6;A0A1A7WGD9;A0A1A7Z4A6;A0A1A8D2Q6;A0A1A8D8C3;A0A1A8GCR2;A0A1A8I584;A0A1A8KR84;A0A1A8MAY9;A0A1A8QC83;A0A1A8UI02;A0A060XII9;A0A060XJX9;A0A087XQU7;A0A146Q523;A0A146Z4H1;A0A146Z4K2;A0A146Z4L3;A0A146Z4P1;A0A146Z5L2;A0A146Z6F5;A0A146Z650;F1R443;F1R446;G3Q393;G3Q398;H2MBY2;H2UIA9;H2UIB0;H2UIB1;H3C0G3;H3CBT9;I3JZ89;I3J…	4.51153	0.892071	DTEQVDNWMSK		79.45	676.796	1351.58	2	5.05027	55.3468
	A0A1A8SFC1;A0A1A7WGD9;A0A1A7Z4A6;A0A1A8D2Q6;A0A1A8GCR2;A0A1A8I584;A0A1A8KR84;A0A1A8MXE6;A0A1A8QNY9;A0A060XII9;A0A060XJX9;W5KTF3;W5KTG2	4.24954	2.61477	EGALTNEEVGSDLEQVEVLQK		79.15	763.052	2286.13	3	6.33243	109.237
	A0A1A8SFC1;A0A0R4IJ08;A0A0S7GFS1;A0A0S7GFS2;A0A0S7GFS3;A0A0S7GG64;A0A0S7GGW2;A0A0S7GGW7;A0A0S7GI92;A0A0S7GKU3;A0A0S7GLM7;A0A0S7GLW5;A0A1A7WGD9;A0A1A7Z4A6;A0A1A8AIC9;A0A1A8DRB6;A0A1A8GCR2;A0A1A8KF62;A0A1A8MAY9;A0A1A8MXE6;A0A1A8QNY9;A0A1A8RNY5;A0A1A8UI02;A0A060XII9;A0A060XJX9;A0A087XQU7;A0A146NIL5;A0A146NIU7;A0A146NJR6;A0A146Q523;A0A146Z4J7;A0A146Z4L3;A0A146Z4P1;A0A146Z6F5;A0A146Z650;C0PUV6;F1R443;…	1158.65	1.01947	QETFDAGLQAFQQEGITNITALKDQLLAAK		78.96	816.434	3261.71	4	4.85996	190.921
	A0A1A8SFC1;A0A0R4IJ08;A0A0S7GFS1;A0A0S7GFS2;A0A0S7GFS3;A0A0S7GG64;A0A0S7GGW2;A0A0S7GGW7;A0A0S7GI92;A0A0S7GKU3;A0A0S7GLM7;A0A0S7GLW5;A0A1A7WGD9;A0A1A7Z4A6;A0A1A8AIC9;A0A1A8DRB6;A0A1A8GCR2;A0A1A8KF62;A0A1A8MAY9;A0A1A8MXE6;A0A1A8QNY9;A0A1A8RNY5;A0A1A8UI02;A0A060XII9;A0A060XJX9;A0A087XQU7;A0A146NIL5;A0A146NIU7;A0A146NJR6;A0A146Q523;A0A146Z4J7;A0A146Z4L3;A0A146Z4P1;A0A146Z6F5;A0A146Z650;C0PUV6;F1R443;…	176.05	1.01947	QETFDAGLQAFQQEGITNITALKDQLLAAK	[N-term] Gln->pyro-Glu (N-term Q)	77.51	1082.57	3244.68	3	4.79505	192.126
	A0A1A8SFC1;A0A0P7VEP4;A0A0R4IJ08;A0A0S7GKQ9;A0A0S7GMT1;A0A0S7GRJ6;A0A1A7WGD9;A0A1A7Z4A6;A0A1A8D2Q6;A0A1A8D8C3;A0A1A8GCR2;A0A1A8I584;A0A1A8KR84;A0A1A8MAY9;A0A1A8QC83;A0A1A8UI02;A0A060XII9;A0A087XQU7;A0A146Q523;A0A146Z4H1;A0A146Z4K2;A0A146Z4L3;A0A146Z4P1;A0A146Z5L2;A0A146Z6F5;A0A146Z650;F1R443;F1R446;G3Q393;G3Q398;H2UIA9;H2UIB0;H2UIB1;H3C0G3;H3CBT9;I3JZ89;I3JZ90;M4A8R0;Q4T9R4;Q4T9R5;W5KTF3;W5KTG2;W…	1.19251	1.01947	RAALEDSFHLQQFFR		77.08	622.323	1863.95	3	3.76403	124.952
	A0A1A8SFC1;A0A0R4IJ08;A0A0S7GFR3;A0A0S7GFS3;A0A0S7GG64;A0A0S7GGW2;A0A0S7GKU3;A0A0S7GNH5;A0A1A7WGD9;A0A1A7Z4A6;A0A1A8AIC9;A0A1A8DRB6;A0A1A8GCR2;A0A1A8KF62;A0A1A8MAY9;A0A1A8MXE6;A0A1A8QNY9;A0A1A8RNY5;A0A1A8UI02;A0A060XII9;A0A060XJX9;A0A087XQU7;A0A146NIL5;A0A146NIU7;A0A146NJR6;A0A146Z4H1;A0A146Z4P1;F1R446;G3Q398;H2MBY2;H2UIB0;I3JZ89;M4A8R0;W5KTF3;W5KTG2;W5MFM2;W5MFP4	1.81363	0.890157	LQTATDESYKDPTNIQLSK		77.03	718.032	2151.07	3	1.28737	63.1219
	A0A1A8SFC1;A0A0D9SGF6;A0A0P7V2T7;A0A0P7VEP4;A0A0R4IJ08;A0A0S7GFS1;A0A0S7GFS2;A0A0S7GFS3;A0A0S7GG64;A0A0S7GGW2;A0A0S7GGW7;A0A0S7GI92;A0A0S7GKU3;A0A0S7GLM7;A0A0S7GLW5;A0A1A7WGD9;A0A1A7Z4A6;A0A1A8AIC9;A0A1A8DRB6;A0A1A8GCR2;A0A1A8KF62;A0A1A8MAY9;A0A1A8MXE6;A0A1A8QNY9;A0A1A8RNY5;A0A1A8UI02;A0A060XII9;A0A060XJX9;A0A087XQU7;A0A146NIL5;A0A146NIU7;A0A146NJR6;A0A146Q523;A0A146Z4J7;A0A146Z4K2;A0A146Z4L3;A0A…	1.51824	0.852764	DLSSVQTLLTK		76.54	602.844	1203.67	2	2.8522	99.131
	A0A1A8SFC1;A0A0P7VEP4;A0A0R4IJ08;A0A0S7GKQ9;A0A0S7GMT1;A0A0S7GRJ6;A0A1A7WGD9;A0A1A7Z4A6;A0A1A8D2Q6;A0A1A8D8C3;A0A1A8GCR2;A0A1A8I584;A0A1A8KR84;A0A1A8MAY9;A0A1A8QC83;A0A1A8UI02;A0A060XII9;A0A060XJX9;A0A087XQU7;A0A146Q523;A0A146Z4H1;A0A146Z4K2;A0A146Z4L3;A0A146Z4P1;A0A146Z5L2;A0A146Z6F5;A0A146Z650;F1R443;F1R446;G3Q393;G3Q398;H2MBY2;H2UIA9;H2UIB0;H2UIB1;H3C0G3;H3CBT9;I3JZ89;I3JZ90;M4A8R0;Q4T9R4;Q4T9…	1.13379	1.01947	DSDELKSWINEK		75.04	732.356	1462.7	2	5.36109	70.5467
	A0A1A8SFC1;A0A0D9SGF6;A0A0P7V2T7;A0A0P7VEP4;A0A0R4IJ08;A0A0S7GFS1;A0A0S7GFS2;A0A0S7GFS3;A0A0S7GG64;A0A0S7GGW2;A0A0S7GGW7;A0A0S7GI92;A0A0S7GKU3;A0A0S7GLM7;A0A0S7GLW5;A0A1A7WGD9;A0A1A7Z4A6;A0A1A8AIC9;A0A1A8DRB6;A0A1A8GCR2;A0A1A8KF62;A0A1A8MAY9;A0A1A8MXE6;A0A1A8QNY9;A0A1A8RNY5;A0A1A8UI02;A0A060XII9;A0A060XJX9;A0A087XQU7;A0A146NIL5;A0A146NIU7;A0A146NJR6;A0A146Q523;A0A146Z4J7;A0A146Z4K2;A0A146Z4L3;A0A…	1.03818	0.845309	ASAFNSWFENAEEDLTDPVR		74.24	1149.52	2297.03	2	4.16893	161.833
	A0A1A8SFC1;A0A0D9SGF6;A0A0P7VEP4;A0A0R4IJ08;A0A0S7GFR3;A0A0S7GFS2;A0A0S7GG64;A0A0S7GKU3;A0A0S7GLM7;A0A1A7WGD9;A0A1A7Z4A6;A0A1A8D2Q6;A0A1A8GCR2;A0A1A8I584;A0A1A8KR84;A0A1A8MXE6;A0A1A8QNY9;A0A060XII9;A0A146NIL5;A0A146NIU7;A0A146NJR6;A0A146Q523;A0A146Z4H1;A0A146Z4J7;A0A146Z4K2;A0A146Z4L3;A0A146Z4P1;A0A146Z5L2;A0A146Z6F5;A0A146Z650;F1R443;F1R446;G3Q393;G3Q398;H2MBY2;H2UIA9;H2UIB0;H2UIB1;H3C0G3;H3CBT9…	9.89134	42.8179	KGDILTLLNSTNKDWWK		73.99	678.035	2031.08	3	1.34542	153.628
	A0A1A8SFC1;A0A0D9SGF6;A0A0P7VEP4;A0A0R4IJ08;A0A0S7GKE8;A0A0S7GMT1;A0A0S7GQA6;A0A1A7WGD9;A0A1A7Z4A6;A0A1A8D2Q6;A0A1A8D8C3;A0A1A8GCR2;A0A1A8I584;A0A1A8KR84;A0A1A8MAY9;A0A1A8QC83;A0A1A8UI02;A0A060XII9;A0A060XJX9;A0A087XQU7;A0A146Q523;A0A146Z4H1;A0A146Z4K2;A0A146Z4L3;A0A146Z4P1;A0A146Z5L2;A0A146Z6F5;A0A146Z650;F1R443;F1R446;G3Q393;G3Q398;I3JZ89;I3JZ90;M4A8R0;Q566W8;Q13813;W5KTF3;W5KTG2;W5MFM2;W5MFP4	2.07143	0.191413	DLTSWVTEMK		73.73	605.296	1208.58	2	6.47796	114.66
	A0A1A8SFC1;A0A0P7VEP4;A0A1A7Z4A6;A0A1A8D2Q6;A0A1A8D8C3;A0A1A8GCR2;A0A1A8I584;A0A1A8KR84;A0A1A8MAY9;A0A1A8QC83;A0A1A8UI02;A0A060XII9;A0A060XJX9;G3Q393;G3Q398;W5MFM2;W5MFP4	375.95	325.392	HQAFEAEVQANAGAIIK		72.73	599.649	1795.92	3	2.76581	83.9641
	A0A1A8SFC1;A0A0R4IJ08;A0A0S7GFQ8;A0A0S7GFR3;A0A0S7GFS1;A0A0S7GFS2;A0A0S7GFS3;A0A0S7GFT9;A0A0S7GG64;A0A0S7GGW2;A0A0S7GGW7;A0A0S7GKU3;A0A0S7GLM7;A0A0S7GNH5;A0A1A7WGD9;A0A1A7Z4A6;A0A1A8AIC9;A0A1A8DRB6;A0A1A8GCR2;A0A1A8KF62;A0A1A8MAY9;A0A1A8MXE6;A0A1A8QNY9;A0A1A8RNY5;A0A1A8UI02;A0A060XII9;A0A060XJX9;A0A087XQU7;A0A146NIL5;A0A146NIU7;A0A146NJR6;A0A146Q523;A0A146Z4H1;A0A146Z4J7;A0A146Z4K2;A0A146Z4L3;A0A…	1.2166	0.487952	EAFLASDDKGDSLDSVEALIK		71.06	741.709	2222.11	3	2.41343	138.153
	A0A1A8SFC1;A0A0D9SGF6;A0A0P7V2T7;A0A0P7VEP4;A0A0R4IJ08;A0A0S7GFS2;A0A0S7GFS3;A0A0S7GGW7;A0A0S7GI92;A0A0S7GKU3;A0A1A7WGD9;A0A1A7Z4A6;A0A1A8AIC9;A0A1A8DRB6;A0A1A8GCR2;A0A1A8KF62;A0A1A8MAY9;A0A1A8MXE6;A0A1A8QNY9;A0A1A8RNY5;A0A1A8UI02;A0A060XII9;A0A060XJX9;A0A087XQU7;A0A146NIU7;A0A146Q523;A0A146Z4J7;A0A146Z4L3;A0A146Z4P1;A0A146Z6F5;A0A146Z650;C0PUV6;F1R443;F1R445;F1R446;F8K8N3;G3Q393;G3Q398;H2MBY2;H2…	748.413	24.6248	KIEDLGAAMEEALILDNK		70.83	987.022	1972.03	2	5.20131	152.693
	A0A1A8SFC1;A0A0D9SGF6;A0A0P7V2T7;A0A0P7VEP4;A0A0R4IJ08;A0A0S7GFR3;A0A0S7GFS2;A0A0S7GG64;A0A0S7GKU3;A0A0S7GLM7;A0A1A7WGD9;A0A1A7Z4A6;A0A1A8D2Q6;A0A1A8GCR2;A0A1A8I584;A0A1A8KR84;A0A1A8MAY9;A0A060XII9;A0A060XJX9;A0A087XQU7;A0A146NIL5;A0A146NIU7;A0A146NJR6;A0A146Q523;A0A146Z4H1;A0A146Z4J7;A0A146Z4L3;A0A146Z4P1;A0A146Z5L2;A0A146Z6F5;A0A146Z650;F1R443;F1R446;G3Q393;G3Q398;H2MBY2;H2UIA9;H2UIB0;H2UIB1;H3…	0.646554	0.72502	GKDLIGVQNLLK		69.7	649.397	1296.78	2	-1.08841	96.0961
	A0A1A8SFC1;A0A0R4IJ08;A0A0S7GFR3;A0A0S7GFS2;A0A0S7GG64;A0A0S7GKU3;A0A0S7GLM7;A0A1A7WGD9;A0A1A7Z4A6;A0A1A8D2Q6;A0A1A8D8C3;A0A1A8GCR2;A0A1A8I584;A0A1A8KR84;A0A1A8QNY9;A0A060XII9;A0A060XJX9;A0A087XQU7;A0A146NIL5;A0A146NIU7;A0A146NJR6;A0A146Q523;A0A146Z4H1;A0A146Z4J7;A0A146Z4K2;A0A146Z4L3;A0A146Z4P1;A0A146Z5L2;A0A146Z6F5;A0A146Z650;F1R443;F1R446;H2UIA9;H2UIB0;H2UIB1;M4A8R0;W5KTF3;W5KTG2	1.86448	25.3728	EKEPIVGSPDYGKDEDSAEALLK		67.62	830.747	2489.22	3	-0.0692612	82.4828
	A0A1A8SFC1;A0A0D9SGF6;A0A0P7VEP4;A0A0R4IJ08;A0A0S7GFR3;A0A0S7GFS1;A0A0S7GFS2;A0A0S7GFS3;A0A0S7GG64;A0A0S7GGW2;A0A0S7GGW7;A0A0S7GKU3;A0A0S7GLM7;A0A0S7GNH5;A0A1A7WGD9;A0A1A7Z4A6;A0A1A8AIC9;A0A1A8DRB6;A0A1A8GCR2;A0A1A8KF62;A0A1A8MAY9;A0A1A8MXE6;A0A1A8QNY9;A0A1A8RNY5;A0A1A8UI02;A0A060XII9;A0A060XJX9;A0A087XQU7;A0A146NIL5;A0A146NIU7;A0A146NJR6;A0A146Q523;A0A146Z4H1;A0A146Z4J7;A0A146Z4K2;A0A146Z4L3;A0A…	1.68847	1.87492	DLMSWINGIR		67.46	602.812	1203.61	2	-0.298836	155.21
	A0A1A8SFC1;A0A0D9SGF6;A0A0P7V2T7;A0A0P7VEP4;A0A0R4IJ08;A0A0S7GFS1;A0A0S7GFS2;A0A0S7GFS3;A0A0S7GG64;A0A0S7GGW2;A0A0S7GGW7;A0A0S7GI92;A0A0S7GKU3;A0A0S7GLM7;A0A0S7GLW5;A0A1A7WGD9;A0A1A7Z4A6;A0A1A8AIC9;A0A1A8DRB6;A0A1A8GCR2;A0A1A8KF62;A0A1A8MAY9;A0A1A8MXE6;A0A1A8QNY9;A0A1A8RNY5;A0A1A8UI02;A0A060XII9;A0A060XJX9;A0A087XQU7;A0A146NIL5;A0A146NIU7;A0A146NJR6;A0A146Q523;A0A146Z4J7;A0A146Z4K2;A0A146Z4L3;A0A…	44.1651	0.424204	ASAFNSWFENAEEDLTDPVR		66.91	766.686	2297.04	3	6.9364	164.274
	A0A1A8SFC1;A0A1A7WGD9;A0A1A7Z4A6;A0A1A8AIC9;A0A1A8DRB6;A0A1A8GCR2;A0A1A8KF62;A0A1A8MAY9;A0A1A8MXE6;A0A1A8QNY9;A0A1A8RNY5;A0A1A8UI02;A0A060XII9;A0A060XJX9;G3Q393;G3Q398;H2MBY2;H2UIA9;H2UIB0;H2UIB1;H3C0G3;H3CBT9;I3JZ89;I3JZ90;Q4T9R4;W5KTF3;W5KTG2	1.11623	0.116383	GHYASPEIQQK		66.23	419.88	1256.62	3	6.94991	21.7151
	A0A1A8SFC1;A0A0D9SGF6;A0A0P7V2T7;A0A0P7VEP4;A0A0R4IJ08;A0A0S7GFR3;A0A0S7GFS2;A0A0S7GG64;A0A0S7GKU3;A0A0S7GLM7;A0A1A7WGD9;A0A1A7Z4A6;A0A1A8D2Q6;A0A1A8D8C3;A0A1A8GCR2;A0A1A8I584;A0A1A8KR84;A0A1A8MAY9;A0A1A8QC83;A0A060XJX9;A0A087XQU7;A0A146NIL5;A0A146NIU7;A0A146NJR6;A0A146Q523;A0A146Z4H1;A0A146Z4J7;A0A146Z4K2;A0A146Z4L3;A0A146Z4P1;A0A146Z5L2;A0A146Z6F5;A0A146Z650;F1R443;F1R446;G3Q393;G3Q398;H2MBY2;H…	1.77112	0.00401734	DVEDEETWIR		65.86	646.296	1290.58	2	5.49503	68.6247
	A0A1A8SFC1;A0A0P7VEP4;A0A0R4IJ08;A0A0S7GFS1;A0A0S7GFS2;A0A0S7GFS3;A0A0S7GG64;A0A0S7GGW2;A0A0S7GGW7;A0A0S7GI92;A0A0S7GKU3;A0A0S7GLM7;A0A0S7GLW5;A0A1A7WGD9;A0A1A7Z4A6;A0A1A8AIC9;A0A1A8DRB6;A0A1A8GCR2;A0A1A8KF62;A0A1A8MAY9;A0A1A8MXE6;A0A1A8QNY9;A0A1A8RNY5;A0A1A8UI02;A0A060XII9;A0A060XJX9;A0A087XQU7;A0A146NIL5;A0A146NIU7;A0A146NJR6;A0A146Q523;A0A146Z4J7;A0A146Z4K2;A0A146Z4L3;A0A146Z4P1;A0A146Z6F5;A0A…	357.792	2.6172	CNSLEEIR	[1] Methylthio (C)	65.69	505.229	1008.44	2	4.26409	42.7674
	A0A1A8SFC1;A0A0D9SGF6;A0A0P7V2T7;A0A0P7VEP4;A0A0R4IJ08;A0A0S7GKQ9;A0A0S7GMT1;A0A0S7GRJ6;A0A1A7WGD9;A0A1A7Z4A6;A0A1A8D2Q6;A0A1A8D8C3;A0A1A8GCR2;A0A1A8I584;A0A1A8KR84;A0A1A8MAY9;A0A1A8QC83;A0A1A8UI02;A0A060XII9;A0A060XJX9;A0A087XQU7;A0A146Q523;A0A146Z4H1;A0A146Z4K2;A0A146Z4L3;A0A146Z4P1;A0A146Z5L2;A0A146Z6F5;A0A146Z650;F1R443;F1R446;G3Q393;G3Q398;H2MBY2;H2UIA9;H2UIB0;H2UIB1;H3C0G3;H3CBT9;I3JZ89;I3J…	0.821047	1.11662	ITALDEFATK		65	554.791	1107.57	2	-11.0637	72.3097
	A0A1A8SFC1;A0A0P7VEP4;A0A0R4IJ08;A0A0S7GFQ2;A0A0S7GFQ8;A0A0S7GFR3;A0A0S7GFS1;A0A0S7GFS2;A0A0S7GFS3;A0A0S7GG64;A0A0S7GGW2;A0A0S7GGW7;A0A0S7GI92;A0A0S7GKU3;A0A0S7GLM7;A0A0S7GLW5;A0A0S7GNH5;A0A1A7WGD9;A0A1A7Z4A6;A0A1A8AIC9;A0A1A8DRB6;A0A1A8GCR2;A0A1A8KF62;A0A1A8MAY9;A0A1A8MXE6;A0A1A8QNY9;A0A1A8RNY5;A0A1A8UI02;A0A060XII9;A0A060XJX9;A0A087XQU7;A0A146NIL5;A0A146NIU7;A0A146NJR6;A0A146Q523;A0A146Z4J7;A0A…	1.55949	1.01947	DLDDEESWIKEK		64.98	502.906	1505.7	3	3.79862	67.8497
	A0A1A8SFC1;A0A0D9SGF6;A0A0P7V2T7;A0A0P7VEP4;A0A0R4IJ08;A0A0S7GFS2;A0A0S7GFS3;A0A0S7GGW7;A0A0S7GI92;A0A0S7GKU3;A0A1A7WGD9;A0A1A7Z4A6;A0A1A8AIC9;A0A1A8DRB6;A0A1A8GCR2;A0A1A8KF62;A0A1A8MAY9;A0A1A8MXE6;A0A1A8QNY9;A0A1A8RNY5;A0A1A8UI02;A0A060XII9;A0A060XJX9;A0A087XQU7;A0A146NIU7;A0A146Q523;A0A146Z4J7;A0A146Z4L3;A0A146Z4P1;A0A146Z6F5;A0A146Z650;C0PUV6;F1R443;F1R445;F1R446;F8K8N3;G3Q393;G3Q398;H2MBY2;H2…	0.00150252	0.0161301	MQHNLEQQIQAR		63.72	499.254	1494.74	3	-0.210263	31.0477
	A0A1A8SFC1;A0A0P7VEP4;A0A0R4IJ08;A0A0S7GFR3;A0A0S7GFS1;A0A0S7GFS2;A0A0S7GFS3;A0A0S7GG64;A0A0S7GGW2;A0A0S7GGW7;A0A0S7GKU3;A0A0S7GLM7;A0A0S7GNH5;A0A1A7WGD9;A0A1A7Z4A6;A0A1A8AIC9;A0A1A8DRB6;A0A1A8GCR2;A0A1A8KF62;A0A1A8MAY9;A0A1A8MXE6;A0A1A8QNY9;A0A1A8RNY5;A0A1A8UI02;A0A060XII9;A0A060XJX9;A0A087XQU7;A0A146NIL5;A0A146NIU7;A0A146NJR6;A0A146Q523;A0A146Z4H1;A0A146Z4J7;A0A146Z4K2;A0A146Z4L3;A0A146Z4P1;A0A…	1.51961	32.2562	LIQSHPEAVDDIQEK		63.33	574.629	1720.86	3	2.61635	42.2722
	A0A1A8SFC1;A0A0P7V2T7;A0A0P7VEP4;A0A0R4IJ08;A0A0S7GKE8;A0A0S7GMT1;A0A0S7GQA6;A0A1A7WGD9;A0A1A7Z4A6;A0A1A8D2Q6;A0A1A8D8C3;A0A1A8GCR2;A0A1A8I584;A0A1A8KR84;A0A1A8MAY9;A0A1A8QC83;A0A1A8UI02;A0A060XII9;A0A060XJX9;A0A087XQU7;A0A146Q523;A0A146Z4H1;A0A146Z4K2;A0A146Z4L3;A0A146Z4P1;A0A146Z5L2;A0A146Z6F5;A0A146Z650;F1R443;F1R446;G3Q393;G3Q398;H2MBY2;I3JZ89;I3JZ90;M4A8R0;Q566W8;W5KTF3;W5KTG2;W5MFM2;W5MFP4	4.7557	1.01947	ALINADELANDVAGAEALLDR		63.3	1077.56	2153.1	2	2.01469	185.541
	A0A1A8SFC1;A0A0D9SGF6;A0A0P7VEP4;A0A0R4IJ08;A0A0S7GFR3;A0A0S7GFS2;A0A0S7GG64;A0A0S7GKU3;A0A0S7GLM7;A0A1A7WGD9;A0A1A7Z4A6;A0A1A8D2Q6;A0A1A8D8C3;A0A1A8GCR2;A0A1A8I584;A0A1A8KR84;A0A1A8MAY9;A0A1A8QC83;A0A1A8UI02;A0A060XII9;A0A060XJX9;A0A087XQU7;A0A146NJR6;A0A146Q523;A0A146Z4H1;A0A146Z4J7;A0A146Z4K2;A0A146Z4L3;A0A146Z4P1;A0A146Z5L2;A0A146Z6F5;A0A146Z650;F1R443;F1R446;G3Q393;G3Q398;H2MBY2;H2UIA9;H2UIB…	0.908829	0.475904	HALLEADVAAHQDR		62.69	515.936	1544.79	3	10.1322	40.423
	A0A1A8SFC1;A0A0R4IJ08;A0A0S7GFQ8;A0A0S7GFR3;A0A0S7GFS1;A0A0S7GFS2;A0A0S7GFS3;A0A0S7GFT9;A0A0S7GG64;A0A0S7GGW2;A0A0S7GGW7;A0A0S7GKU3;A0A0S7GLM7;A0A0S7GNH5;A0A1A7WGD9;A0A1A7Z4A6;A0A1A8AIC9;A0A1A8DRB6;A0A1A8GCR2;A0A1A8KF62;A0A1A8MAY9;A0A1A8MXE6;A0A1A8QNY9;A0A1A8RNY5;A0A1A8UI02;A0A060XII9;A0A060XJX9;A0A087XQU7;A0A146NIL5;A0A146NIU7;A0A146NJR6;A0A146Q523;A0A146Z4H1;A0A146Z4J7;A0A146Z4K2;A0A146Z4L3;A0A…	1.64574	1.01947	EAFLASDDKGDSLDSVEALIK		62.33	1112.06	2222.1	2	1.50482	138.153
	A0A1A8SFC1;A0A0D9SGF6;A0A0P7VEP4;A0A0R4IJ08;A0A0S7GFQ2;A0A0S7GFQ8;A0A0S7GFR3;A0A0S7GFS1;A0A0S7GFS2;A0A0S7GFS3;A0A0S7GG64;A0A0S7GGW2;A0A0S7GGW7;A0A0S7GI92;A0A0S7GKU3;A0A0S7GLM7;A0A0S7GLW5;A0A0S7GNH5;A0A1A7WGD9;A0A1A7Z4A6;A0A1A8AIC9;A0A1A8DRB6;A0A1A8GCR2;A0A1A8KF62;A0A1A8MAY9;A0A1A8MXE6;A0A1A8QNY9;A0A1A8RNY5;A0A1A8UI02;A0A060XII9;A0A060XJX9;A0A087XQU7;A0A146NIL5;A0A146NIU7;A0A146NJR6;A0A146Q523;A0A…	4.71858	1.01947	LEESLEYQQFVANVEEEEAWINEK		62.07	976.131	2925.37	3	4.07214	165.566
	A0A1A8SFC1;A0A0P7VEP4;A0A0R4IJ08;A0A0S7GKQ9;A0A0S7GMT1;A0A0S7GRJ6;A0A1A7WGD9;A0A1A7Z4A6;A0A1A8D2Q6;A0A1A8D8C3;A0A1A8GCR2;A0A1A8I584;A0A1A8KR84;A0A1A8MAY9;A0A1A8QC83;A0A1A8UI02;A0A060XII9;A0A087XQU7;A0A146Q523;A0A146Z4H1;A0A146Z4K2;A0A146Z4L3;A0A146Z4P1;A0A146Z5L2;A0A146Z6F5;A0A146Z650;F1R443;F1R446;G3Q393;G3Q398;H2UIA9;H2UIB0;H2UIB1;H3C0G3;H3CBT9;I3JZ89;I3JZ90;M4A8R0;Q4T9R4;Q4T9R5;W5KTF3;W5KTG2;W…	0.396837	0.831982	AALEDSFHLQQFFR		60.37	570.291	1707.85	3	6.80052	138.511
	A0A1A8SFC1;A0A0P7VEP4;A0A0R4IJ08;A0A0S7GFQ2;A0A0S7GFQ8;A0A0S7GFR3;A0A0S7GFS1;A0A0S7GFS2;A0A0S7GFS3;A0A0S7GG64;A0A0S7GGW2;A0A0S7GGW7;A0A0S7GI92;A0A0S7GKU3;A0A0S7GLM7;A0A0S7GLW5;A0A0S7GNH5;A0A1A7WGD9;A0A1A7Z4A6;A0A1A8AIC9;A0A1A8DRB6;A0A1A8GCR2;A0A1A8KF62;A0A1A8MAY9;A0A1A8MXE6;A0A1A8QNY9;A0A1A8RNY5;A0A1A8UI02;A0A060XII9;A0A060XJX9;A0A087XQU7;A0A146NIL5;A0A146NIU7;A0A146NJR6;A0A146Q523;A0A146Z4J7;A0A…	7.88007	0.0992557	DLDDEESWIK		60.1	625.285	1248.56	2	4.38244	78.0972
	A0A1A8SFC1;A0A0P7V2T7;A0A0S7GFS1;A0A0S7GFS2;A0A0S7GFS3;A0A0S7GG64;A0A0S7GGW2;A0A0S7GGW7;A0A0S7GI92;A0A0S7GKU3;A0A0S7GLM7;A0A0S7GLW5;A0A1A7WGD9;A0A1A7Z4A6;A0A1A8AIC9;A0A1A8DRB6;A0A1A8GCR2;A0A1A8KF62;A0A1A8MAY9;A0A1A8MXE6;A0A1A8QNY9;A0A1A8RNY5;A0A1A8UI02;A0A060XJX9;A0A146NIL5;A0A146NIU7;A0A146NJR6;A0A146Q523;A0A146Z4J7;A0A146Z4K2;A0A146Z4L3;A0A146Z4P1;A0A146Z6F5;A0A146Z650;C0PUV6;G3Q393;G3Q398;H2MB…	0.915266	0.700824	LLEAQEHFR		59.87	571.799	1141.58	2	-6.0651	40.3512
	A0A1A8SFC1;A0A0D9SGF6;A0A0P7V2T7;A0A0P7VEP4;A0A0R4IJ08;A0A0S7GFQ2;A0A0S7GFQ8;A0A0S7GFR3;A0A0S7GFS1;A0A0S7GFS2;A0A0S7GFS3;A0A0S7GG64;A0A0S7GGW2;A0A0S7GGW7;A0A0S7GI92;A0A0S7GKU3;A0A0S7GLM7;A0A0S7GLW5;A0A0S7GNH5;A0A1A7WGD9;A0A1A7Z4A6;A0A1A8AIC9;A0A1A8DRB6;A0A1A8GCR2;A0A1A8KF62;A0A1A8MAY9;A0A1A8MXE6;A0A1A8QNY9;A0A1A8RNY5;A0A1A8UI02;A0A060XII9;A0A060XJX9;A0A087XQU7;A0A146NIL5;A0A146NIU7;A0A146NJR6;A0A…	0.128867	41.2466	HQAFEAELHANADR		59.07	536.923	1607.75	3	3.95866	36.1187
	A0A1A8SFC1;A0A0R4IJ08;A0A0S7GFR3;A0A0S7GFS1;A0A0S7GFS2;A0A0S7GFS3;A0A0S7GG64;A0A0S7GGW2;A0A0S7GGW7;A0A0S7GKU3;A0A0S7GLM7;A0A0S7GNH5;A0A1A7WGD9;A0A1A7Z4A6;A0A1A8AIC9;A0A1A8DRB6;A0A1A8GCR2;A0A1A8MAY9;A0A1A8MXE6;A0A1A8QNY9;A0A1A8RNY5;A0A1A8UI02;A0A060XII9;A0A060XJX9;A0A087XQU7;A0A146NIL5;A0A146NIU7;A0A146NJR6;A0A146Q523;A0A146Z4H1;A0A146Z4J7;A0A146Z4K2;A0A146Z4L3;A0A146Z4P1;A0A146Z5L2;A0A146Z6F5;A0A…	1.11941	0.935289	SNMLGSAHEVQR		58.43	443.55	1327.63	3	-0.271899	27.1652
	A0A1A8SFC1;A0A0D9SGF6;A0A0P7VEP4;A0A0R4IJ08;A0A0S7GKE8;A0A0S7GMT1;A0A0S7GQA6;A0A1A7WGD9;A0A1A7Z4A6;A0A1A8D2Q6;A0A1A8D8C3;A0A1A8GCR2;A0A1A8I584;A0A1A8KR84;A0A1A8MAY9;A0A1A8QC83;A0A1A8UI02;A0A060XII9;A0A060XJX9;A0A087XQU7;A0A146Q523;A0A146Z4H1;A0A146Z4K2;A0A146Z4L3;A0A146Z4P1;A0A146Z5L2;A0A146Z6F5;F1R443;F1R446;G3Q393;G3Q398;H2MBY2;H2UIA9;H2UIB0;H2UIB1;H3C0G3;H3CBT9;M4A8R0;Q4T9R4;Q566W8;Q13813;W5KT…	9.5342	1.23316	EQLMASDDFGR		57.64	634.784	1267.55	2	1.9613	56.4104
	A0A1A8SFC1;A0A0D9SGF6;A0A0P7VEP4;A0A0R4IJ08;A0A0S7GKE8;A0A0S7GMT1;A0A0S7GQA6;A0A1A7WGD9;A0A1A7Z4A6;A0A1A8D2Q6;A0A1A8D8C3;A0A1A8GCR2;A0A1A8I584;A0A1A8KR84;A0A1A8MAY9;A0A1A8QC83;A0A1A8UI02;A0A060XII9;A0A060XJX9;A0A087XQU7;A0A146Q523;A0A146Z4H1;A0A146Z4K2;A0A146Z4L3;A0A146Z4P1;A0A146Z5L2;A0A146Z6F5;F1R443;F1R446;G3Q393;G3Q398;H2MBY2;H2UIA9;H2UIB0;H2UIB1;H3C0G3;H3CBT9;M4A8R0;Q4T9R4;Q566W8;Q13813;W5KT…	0.0416343	6.13441	EKEQLMASDDFGRDLASVQALLR		57.25	648.836	2591.31	4	5.12752	164.992
	A0A1A8SFC1;A0A0P7VEP4;A0A0R4IJ08;A0A0S7GKQ9;A0A0S7GMT1;A0A0S7GRJ6;A0A1A7WGD9;A0A1A7Z4A6;A0A1A8D2Q6;A0A1A8D8C3;A0A1A8GCR2;A0A1A8I584;A0A1A8KR84;A0A1A8MAY9;A0A1A8QC83;A0A1A8UI02;A0A060XII9;A0A087XQU7;A0A146Q523;A0A146Z4H1;A0A146Z4K2;A0A146Z4L3;A0A146Z4P1;A0A146Z5L2;A0A146Z6F5;A0A146Z650;F1R443;F1R446;G3Q393;G3Q398;H2UIA9;H2UIB0;H2UIB1;H3C0G3;H3CBT9;I3JZ89;I3JZ90;M4A8R0;Q4T9R4;Q4T9R5;W5KTF3;W5KTG2;W…	1.03818	313.195	RAALEDSFHLQQFFR		57.22	466.997	1863.96	4	9.12968	123.824
	A0A1A8SFC1;A0A0D9SGF6;A0A0P7V2T7;A0A0P7VEP4;A0A0R4IJ08;A0A0S7GFQ8;A0A0S7GFR3;A0A0S7GFS1;A0A0S7GFS2;A0A0S7GFS3;A0A0S7GFT9;A0A0S7GG64;A0A0S7GGW2;A0A0S7GGW7;A0A0S7GKU3;A0A0S7GLM7;A0A0S7GNH5;A0A1A7WGD9;A0A1A7Z4A6;A0A1A8AIC9;A0A1A8DRB6;A0A1A8GCR2;A0A1A8KF62;A0A1A8MAY9;A0A1A8MXE6;A0A1A8QNY9;A0A1A8RNY5;A0A1A8UI02;A0A060XII9;A0A060XJX9;A0A087XQU7;A0A146NIL5;A0A146NIU7;A0A146NJR6;A0A146Q523;A0A146Z4H1;A0A…	176.124	1.01947	SKLGESQTLQQFSR		57.05	804.917	1607.82	2	-6.37406	53.0722
	A0A1A8SFC1;A0A0D9SGF6;A0A0P7V2T7;A0A0P7VEP4;A0A0R4IJ08;A0A0S7GKE8;A0A0S7GMT1;A0A0S7GQA6;A0A1A7WGD9;A0A1A7Z4A6;A0A1A8D2Q6;A0A1A8D8C3;A0A1A8GCR2;A0A1A8I584;A0A1A8KR84;A0A1A8MAY9;A0A1A8QC83;A0A1A8UI02;A0A060XII9;A0A060XJX9;A0A087XQU7;A0A146Q523;A0A146Z4H1;A0A146Z4K2;A0A146Z4L3;A0A146Z4P1;A0A146Z5L2;A0A146Z6F5;F1R443;F1R446;H2UIA9;H2UIB0;H2UIB1;I3JZ89;I3JZ90;M4A8R0;Q4T9R4;Q4T9R5;Q566W8;Q13813;W5KTF3;…	1.06504	1.20015	FNRDVDETISWIK		56.12	541.613	1621.82	3	3.67186	98.3523
	A0A1A8SFC1;A0A0D9SGF6;A0A0P7V2T7;A0A0R4IJ08;A0A0S7GFR3;A0A0S7GFS1;A0A0S7GFS2;A0A0S7GFS3;A0A0S7GG64;A0A0S7GGW2;A0A0S7GGW7;A0A0S7GKU3;A0A0S7GLM7;A0A0S7GNH5;A0A1A7WGD9;A0A1A7Z4A6;A0A1A8AIC9;A0A1A8DRB6;A0A1A8GCR2;A0A1A8MAY9;A0A1A8MXE6;A0A1A8QNY9;A0A1A8RNY5;A0A1A8UI02;A0A060XII9;A0A060XJX9;A0A087XQU7;A0A146NIL5;A0A146NIU7;A0A146NJR6;A0A146Q523;A0A146Z4H1;A0A146Z4J7;A0A146Z4K2;A0A146Z4L3;A0A146Z4P1;A0A…	377.696	18.7436	DADETKEWIEEK		55.6	498.234	1491.68	3	7.33982	44.8114
	A0A1A8SFC1;A0A0P7V2T7;A0A0S7GFR3;A0A0S7GFS1;A0A0S7GFS2;A0A0S7GFS3;A0A0S7GG64;A0A0S7GGW2;A0A0S7GGW7;A0A0S7GKU3;A0A0S7GLM7;A0A0S7GNH5;A0A1A7WGD9;A0A1A7Z4A6;A0A1A8AIC9;A0A1A8DRB6;A0A1A8GCR2;A0A1A8KF62;A0A1A8MAY9;A0A1A8MXE6;A0A1A8QNY9;A0A1A8RNY5;A0A1A8UI02;A0A060XJX9;A0A087XQU7;A0A146NIL5;A0A146NIU7;A0A146NJR6;A0A146Q523;A0A146Z4H1;A0A146Z4J7;A0A146Z4K2;A0A146Z4L3;A0A146Z4P1;A0A146Z5L2;A0A146Z6F5;A0A…	0.476975	75.7443	GLVSSEELAKDVTGAEALLER		54.75	547.545	2186.15	4	5.63577	155.21
	A0A1A8SFC1;A0A0D9SGF6;A0A0P7VEP4;A0A0R4IJ08;A0A0S7GKE8;A0A0S7GMT1;A0A0S7GQA6;A0A1A7WGD9;A0A1A7Z4A6;A0A1A8D2Q6;A0A1A8D8C3;A0A1A8GCR2;A0A1A8I584;A0A1A8KR84;A0A1A8MAY9;A0A1A8QC83;A0A1A8UI02;A0A060XII9;A0A060XJX9;A0A087XQU7;A0A146Q523;A0A146Z4H1;A0A146Z4K2;A0A146Z4L3;A0A146Z4P1;A0A146Z5L2;A0A146Z6F5;F1R443;F1R446;G3Q393;G3Q398;H2MBY2;H2UIA9;H2UIB0;H2UIB1;H3C0G3;H3CBT9;M4A8R0;Q4T9R4;Q566W8;Q13813;W5KT…	0.13822	0.0380785	EQLMASDDFGRDLASVQALLR		53.67	779.066	2334.18	3	7.43772	168.006
	A0A1A8SFC1;A0A0P7VEP4;A0A0R4IJ08;A0A0S7GFR3;A0A0S7GFS1;A0A0S7GFS2;A0A0S7GFS3;A0A0S7GG64;A0A0S7GGW2;A0A0S7GGW7;A0A0S7GKU3;A0A0S7GLM7;A0A0S7GNH5;A0A1A7WGD9;A0A1A7Z4A6;A0A1A8AIC9;A0A1A8DRB6;A0A1A8GCR2;A0A1A8KF62;A0A1A8MAY9;A0A1A8MXE6;A0A1A8QNY9;A0A1A8RNY5;A0A1A8UI02;A0A060XII9;A0A060XJX9;A0A087XQU7;A0A146NIL5;A0A146NIU7;A0A146NJR6;A0A146Q523;A0A146Z4H1;A0A146Z4J7;A0A146Z4K2;A0A146Z4L3;A0A146Z4P1;A0A…	7.67321	210.65	LIQSHPEAVDDIQEK		52.66	861.44	1720.86	2	2.68113	42.2016
	A0A1A8SFC1;A0A0D9SGF6;A0A0P7V2T7;A0A0P7VEP4;A0A0R4IJ08;A0A0S7GFR3;A0A0S7GFS2;A0A0S7GG64;A0A0S7GKU3;A0A0S7GLM7;A0A1A7WGD9;A0A1A7Z4A6;A0A1A8D2Q6;A0A1A8D8C3;A0A1A8GCR2;A0A1A8I584;A0A1A8KR84;A0A1A8MAY9;A0A1A8QC83;A0A1A8UI02;A0A060XII9;A0A060XJX9;A0A087XQU7;A0A146NJR6;A0A146Q523;A0A146Z4H1;A0A146Z4J7;A0A146Z4K2;A0A146Z4L3;A0A146Z4P1;A0A146Z5L2;A0A146Z6F5;A0A146Z650;F1R443;F1R446;G3Q393;G3Q398;H2MBY2;H…	1.0417	0.0543832	LREANQQQQFNR		52.37	511.262	1530.76	3	-4.27043	20.2292
	A0A1A8SFC1;A0A0D9SGF6;A0A0P7V2T7;A0A0P7VEP4;A0A0R4IJ08;A0A0S7GKE8;A0A0S7GMT1;A0A0S7GQA6;A0A1A7WGD9;A0A1A7Z4A6;A0A1A8D2Q6;A0A1A8D8C3;A0A1A8GCR2;A0A1A8I584;A0A1A8KR84;A0A1A8MAY9;A0A1A8QC83;A0A1A8UI02;A0A060XII9;A0A060XJX9;A0A087XQU7;A0A146Q523;A0A146Z4H1;A0A146Z4K2;A0A146Z4L3;A0A146Z4P1;A0A146Z5L2;A0A146Z6F5;F1R443;F1R446;G3Q393;G3Q398;H2UIA9;H2UIB0;H2UIB1;H3C0G3;H3CBT9;I3JZ89;I3JZ90;M4A8R0;Q4T9R4;…	0.0367097	0.749109	DVDETISWIK		51.1	603.309	1204.6	2	2.06903	95.814
	A0A1A8SFC1;A0A0D9SGF6;A0A0P7VEP4;A0A0R4IJ08;A0A0S7GFR3;A0A0S7GFS2;A0A0S7GG64;A0A0S7GKU3;A0A0S7GLM7;A0A1A7WGD9;A0A1A7Z4A6;A0A1A8D2Q6;A0A1A8D8C3;A0A1A8GCR2;A0A1A8I584;A0A1A8KR84;A0A1A8MAY9;A0A1A8QC83;A0A1A8UI02;A0A060XII9;A0A060XJX9;A0A087XQU7;A0A146NJR6;A0A146Q523;A0A146Z4H1;A0A146Z4J7;A0A146Z4K2;A0A146Z4L3;A0A146Z4P1;A0A146Z5L2;A0A146Z6F5;A0A146Z650;F1R443;F1R446;G3Q393;G3Q398;H2UIA9;H2UIB0;H2UIB…	1.30642	0.821557	LLEATELK		50.6	458.772	915.529	2	-0.816887	51.8015
	A0A1A8SFC1;A0A0D9SGF6;A0A0P7V2T7;A0A0P7VEP4;A0A0R4IJ08;A0A0S7GFQ2;A0A0S7GFQ8;A0A0S7GFR3;A0A0S7GFS1;A0A0S7GFS2;A0A0S7GFS3;A0A0S7GG64;A0A0S7GGW2;A0A0S7GGW7;A0A0S7GI92;A0A0S7GKU3;A0A0S7GLM7;A0A0S7GLW5;A0A0S7GNH5;A0A1A7WGD9;A0A1A7Z4A6;A0A1A8AIC9;A0A1A8DRB6;A0A1A8GCR2;A0A1A8KF62;A0A1A8MAY9;A0A1A8MXE6;A0A1A8QNY9;A0A1A8RNY5;A0A1A8UI02;A0A060XII9;A0A060XJX9;A0A087XQU7;A0A146NIL5;A0A146NIU7;A0A146NJR6;A0A…	0.953975	0.827656	DLTGVQNLR		47.62	508.28	1014.55	2	-4.07736	50.4624
	A0A1A8SFC1;A0A0D9SGF6;A0A0P7V2T7;A0A0P7VEP4;A0A0R4IJ08;A0A0S7GFQ8;A0A0S7GFR3;A0A0S7GFS1;A0A0S7GFS2;A0A0S7GFS3;A0A0S7GFT9;A0A0S7GG64;A0A0S7GGW2;A0A0S7GGW7;A0A0S7GKU3;A0A0S7GLM7;A0A0S7GNH5;A0A1A7WGD9;A0A1A7Z4A6;A0A1A8AIC9;A0A1A8DRB6;A0A1A8GCR2;A0A1A8KF62;A0A1A8MAY9;A0A1A8MXE6;A0A1A8QNY9;A0A1A8RNY5;A0A1A8UI02;A0A060XII9;A0A060XJX9;A0A087XQU7;A0A146NIL5;A0A146NIU7;A0A146NJR6;A0A146Q523;A0A146Z4H1;A0A…	11.0449	93.973	SKLGESQTLQQFSR		46.81	536.945	1607.81	3	-10.3331	53.0722
	A0A1A8SFC1;A0A0R4IJ08;A0A0S7GKE8;A0A0S7GKV9;A0A0S7GMT1;A0A0S7GPJ4;A0A0S7GQA6;A0A0S7GRJ6;A0A1A7WGD9;A0A1A7Z4A6;A0A1A8D2Q6;A0A1A8D8C3;A0A1A8GCR2;A0A1A8I584;A0A1A8KR84;A0A1A8MAY9;A0A1A8QC83;A0A1A8UI02;A0A060XII9;A0A087XQU7;A0A146Q523;A0A146Z4H1;A0A146Z4K2;A0A146Z4L3;A0A146Z4P1;A0A146Z5L2;A0A146Z6F5;F1R443;F1R446;H2MBY2;H2UIA9;H2UIB0;H2UIB1;H3C0G3;H3CBT9;M4A8R0;Q4T9R4;Q4T9R5;Q566W8;W5KTF3;W5KTG2;W5MF…	1.85005	1.01947	LWDLLLQK		39.08	514.813	1027.61	2	0.50593	123.824
	A0A1A8SFC1;A0A0D9SGF6;A0A0P7V2T7;A0A0P7VEP4;A0A0R4IJ08;A0A0S7GFQ8;A0A0S7GFR3;A0A0S7GFS1;A0A0S7GFS2;A0A0S7GFS3;A0A0S7GFT9;A0A0S7GG64;A0A0S7GGW2;A0A0S7GGW7;A0A0S7GKU3;A0A0S7GLM7;A0A0S7GNH5;A0A1A7WGD9;A0A1A7Z4A6;A0A1A8AIC9;A0A1A8DRB6;A0A1A8GCR2;A0A1A8KF62;A0A1A8MAY9;A0A1A8MXE6;A0A1A8QNY9;A0A1A8RNY5;A0A1A8UI02;A0A060XII9;A0A060XJX9;A0A087XQU7;A0A146NIL5;A0A146NIU7;A0A146NJR6;A0A146Q523;A0A146Z4H1;A0A…	1.03591	0.81451	LGESQTLQQFSR		37.01	465.242	1392.7	3	2.45396	58.6754
	A0A1A8SFC1;A0A0D9SGF6;A0A0P7VEP4;A0A0R4IJ08;A0A0S7GFS1;A0A0S7GFS2;A0A0S7GFS3;A0A0S7GG64;A0A0S7GGW2;A0A0S7GGW7;A0A0S7GI92;A0A0S7GKU3;A0A0S7GLM7;A0A0S7GLW5;A0A1A7WGD9;A0A1A7Z4A6;A0A1A8AIC9;A0A1A8DRB6;A0A1A8GCR2;A0A1A8KF62;A0A1A8MAY9;A0A1A8MXE6;A0A1A8QNY9;A0A1A8RNY5;A0A1A8UI02;A0A060XII9;A0A060XJX9;A0A087XQU7;A0A146NIL5;A0A146NIU7;A0A146NJR6;A0A146Q523;A0A146Z4J7;A0A146Z4K2;A0A146Z4L3;A0A146Z4P1;A0A…	1.53291	0.988724	KVEDLFLTFAK		36.93	655.857	1309.7	2	-23.1591	119.386
	A0A1A8SFC1;A0A0D9SGF6;A0A0P7V2T7;A0A0P7VEP4;A0A0R4IJ08;A0A0S7GFR3;A0A0S7GFS2;A0A0S7GG64;A0A0S7GKU3;A0A0S7GLM7;A0A1A7WGD9;A0A1A7Z4A6;A0A1A8D2Q6;A0A1A8GCR2;A0A1A8I584;A0A1A8KR84;A0A1A8MAY9;A0A060XII9;A0A060XJX9;A0A087XQU7;A0A146NIL5;A0A146NIU7;A0A146NJR6;A0A146Q523;A0A146Z4H1;A0A146Z4J7;A0A146Z4L3;A0A146Z4P1;A0A146Z5L2;A0A146Z6F5;A0A146Z650;F1R443;F1R446;G3Q393;G3Q398;H2MBY2;H2UIA9;H2UIB0;H2UIB1;H3…	1.12398	1.23248	GKDLIGVQNLLKK		36.53	357.226	1424.87	4	2.74437	80.7888
	A0A1A8SFC1;A0A0D9SGF6;A0A0P7V2T7;A0A0P7VEP4;A0A0R4IJ08;A0A0S7GFQ8;A0A0S7GFR3;A0A0S7GFS1;A0A0S7GFS2;A0A0S7GFS3;A0A0S7GFT9;A0A0S7GG64;A0A0S7GGW2;A0A0S7GGW7;A0A0S7GKU3;A0A0S7GLM7;A0A0S7GNH5;A0A1A7WGD9;A0A1A7Z4A6;A0A1A8AIC9;A0A1A8DRB6;A0A1A8GCR2;A0A1A8KF62;A0A1A8MAY9;A0A1A8MXE6;A0A1A8QNY9;A0A1A8RNY5;A0A1A8UI02;A0A060XII9;A0A060XJX9;A0A087XQU7;A0A146NIL5;A0A146NIU7;A0A146NJR6;A0A146Q523;A0A146Z4H1;A0A…	1.03818	173.829	KHEDFDKAINVQEEK		32.61	458.234	1828.91	4	4.44861	30.8362
A0A1A7Z4A6	81	1.54542	1.01947	81
	A0A1A7Z4A6;A0A0D9SGF6;A0A0R4IJ08;A0A0S7GFR3;A0A0S7GFS1;A0A0S7GFS2;A0A0S7GFS3;A0A0S7GG64;A0A0S7GGW2;A0A0S7GGW7;A0A0S7GKU3;A0A0S7GLM7;A0A0S7GNH5;A0A1A7WGD9;A0A1A8GCR2;A0A1A8MAY9;A0A1A8MXE6;A0A1A8QNY9;A0A1A8RNY5;A0A1A8SFC1;A0A060XII9;A0A060XJX9;A0A087XQU7;A0A146NIL5;A0A146NIU7;A0A146NJR6;A0A146Q523;A0A146Z4H1;A0A146Z4J7;A0A146Z4K2;A0A146Z4L3;A0A146Z4P1;A0A146Z5L2;A0A146Z6F5;A0A146Z650;F1QDX2;F1R443;…	1.10634	0.946459	NQALNTDNYGHDLASVQALQR		127.8	776.717	2327.13	3	-0.924291	82.1301
	A0A1A7Z4A6;A0A0P7VEP4;A0A0S7GFQ8;A0A0S7GFR3;A0A0S7GFS1;A0A0S7GFS2;A0A0S7GFS3;A0A0S7GFT9;A0A0S7GG64;A0A0S7GGW2;A0A0S7GGW7;A0A0S7GKU3;A0A0S7GLM7;A0A0S7GNH5;A0A1A7WGD9;A0A1A8AIC9;A0A1A8DRB6;A0A1A8GCR2;A0A1A8KF62;A0A1A8MAY9;A0A1A8MXE6;A0A1A8QNY9;A0A1A8RNY5;A0A1A8SFC1;A0A1A8UI02;A0A060XII9;A0A060XJX9;A0A087XQU7;I3JZ89;I3JZ90;M4A8R0;W5KTF3;W5KTG2	0.0290227	34.4391	AGTFQAFEQFGQQLLAR		122.22	956.489	1910.96	2	1.61374	169.873
	A0A1A7Z4A6;A0A0P7V2T7;A0A0S7GFR3;A0A0S7GFS1;A0A0S7GFS2;A0A0S7GFS3;A0A0S7GG64;A0A0S7GGW2;A0A0S7GGW7;A0A0S7GKU3;A0A0S7GLM7;A0A0S7GNH5;A0A1A7WGD9;A0A1A8AIC9;A0A1A8DRB6;A0A1A8GCR2;A0A1A8KF62;A0A1A8MAY9;A0A1A8MXE6;A0A1A8QNY9;A0A1A8RNY5;A0A1A8SFC1;A0A1A8UI02;A0A060XJX9;A0A087XQU7;A0A146NIL5;A0A146NIU7;A0A146NJR6;A0A146Q523;A0A146Z4H1;A0A146Z4J7;A0A146Z4K2;A0A146Z4L3;A0A146Z4P1;A0A146Z5L2;A0A146Z6F5;A0A…	0.000970093	0.480679	GLVSSEELAKDVTGAEALLER		115.99	729.722	2186.15	3	2.34333	162.693
	A0A1A7Z4A6;A0A0R4IJ08;A0A0S7GFS1;A0A0S7GFS2;A0A0S7GFS3;A0A0S7GG64;A0A0S7GGW2;A0A0S7GGW7;A0A0S7GI92;A0A0S7GKU3;A0A0S7GLM7;A0A0S7GLW5;A0A1A7WGD9;A0A1A8AIC9;A0A1A8DRB6;A0A1A8GCR2;A0A1A8KF62;A0A1A8MAY9;A0A1A8MXE6;A0A1A8QNY9;A0A1A8RNY5;A0A1A8SFC1;A0A1A8UI02;A0A060XII9;A0A060XJX9;A0A087XQU7;A0A146NIL5;A0A146NIU7;A0A146NJR6;A0A146Q523;A0A146Z4J7;A0A146Z4K2;A0A146Z4L3;A0A146Z4P1;A0A146Z6F5;A0A146Z650;F1R…	1.12788	1556.08	LNLVGSEDYGDTLAAVQGLLK		115.77	726.054	2175.14	3	0.603017	171.724
	A0A1A7Z4A6;A0A0R4IJ08;A0A0S7GFS1;A0A0S7GFS2;A0A0S7GFS3;A0A0S7GG64;A0A0S7GGW2;A0A0S7GGW7;A0A0S7GI92;A0A0S7GKU3;A0A0S7GLM7;A0A0S7GLW5;A0A1A7WGD9;A0A1A8AIC9;A0A1A8DRB6;A0A1A8GCR2;A0A1A8KF62;A0A1A8MAY9;A0A1A8MXE6;A0A1A8QNY9;A0A1A8RNY5;A0A1A8SFC1;A0A1A8UI02;A0A060XII9;A0A060XJX9;A0A087XQU7;A0A146NIL5;A0A146NIU7;A0A146NJR6;A0A146Q523;A0A146Z4J7;A0A146Z4K2;A0A146Z4L3;A0A146Z4P1;A0A146Z6F5;A0A146Z650;F1R…	16.1158	1.01947	LNLVGSEDYGDTLAAVQGLLK		109.97	1088.58	2175.15	2	6.71343	175.929
	A0A1A7Z4A6;A0A0D9SGF6;A0A0P7V2T7;A0A0P7VEP4;A0A0R4IJ08;A0A0S7GFS1;A0A0S7GFS2;A0A0S7GFS3;A0A0S7GG64;A0A0S7GGW2;A0A0S7GGW7;A0A0S7GI92;A0A0S7GKU3;A0A0S7GLM7;A0A0S7GLW5;A0A1A7WGD9;A0A1A8AIC9;A0A1A8DRB6;A0A1A8GCR2;A0A1A8KF62;A0A1A8MAY9;A0A1A8MXE6;A0A1A8QNY9;A0A1A8RNY5;A0A1A8SFC1;A0A1A8UI02;A0A1B0GV13;A0A060XII9;A0A060XJX9;A0A087XQU7;A0A146NIL5;A0A146NIU7;A0A146NJR6;A0A146Q523;A0A146Z4J7;A0A146Z4K2;A0A…	1.62303	0.582025	LDENSAFLQFNWK		109.63	806.398	1610.78	2	7.24726	133.8
	A0A1A7Z4A6;A0A0P7V2T7;A0A0P7VEP4;A0A0R4IJ08;A0A0S7GKE8;A0A0S7GMT1;A0A0S7GQA6;A0A1A7WGD9;A0A1A8D2Q6;A0A1A8D8C3;A0A1A8GCR2;A0A1A8I584;A0A1A8KR84;A0A1A8MAY9;A0A1A8QC83;A0A1A8SFC1;A0A1A8UI02;A0A060XII9;A0A060XJX9;A0A087XQU7;A0A146Q523;A0A146Z4H1;A0A146Z4K2;A0A146Z4L3;A0A146Z4P1;A0A146Z5L2;A0A146Z6F5;A0A146Z650;F1R443;F1R446;G3Q393;G3Q398;H2MBY2;I3JZ89;I3JZ90;M4A8R0;Q566W8;W5KTF3;W5KTG2;W5MFM2;W5MFP4	3.19093	1.85266	ALINADELANDVAGAEALLDR		107	718.709	2153.11	3	2.54416	185.541
	A0A1A7Z4A6;A0A0D9SGF6;A0A0P7V2T7;A0A0P7VEP4;A0A0R4IJ08;A0A0S7GFS2;A0A0S7GFS3;A0A0S7GGW7;A0A0S7GI92;A0A0S7GKU3;A0A1A7WGD9;A0A1A8AIC9;A0A1A8DRB6;A0A1A8GCR2;A0A1A8KF62;A0A1A8MAY9;A0A1A8MXE6;A0A1A8QNY9;A0A1A8RNY5;A0A1A8SFC1;A0A1A8UI02;A0A060XII9;A0A060XJX9;A0A087XQU7;A0A146NIU7;A0A146Q523;A0A146Z4J7;A0A146Z4L3;A0A146Z4P1;A0A146Z6F5;A0A146Z650;C0PUV6;F1R443;F1R445;F1R446;F8K8N3;G3Q393;G3Q398;H2MBY2;H2…	2.21306	2.37499	IEDLGAAMEEALILDNK		106.2	922.972	1843.93	2	5.60561	153.845
	A0A1A7Z4A6;A0A1A7WGD9;A0A1A8D2Q6;A0A1A8GCR2;A0A1A8I584;A0A1A8KR84;A0A1A8MXE6;A0A1A8QNY9;A0A1A8SFC1;A0A060XII9;A0A060XJX9;W5KTF3;W5KTG2	1042.5	684.201	EGALTNEEVGSDLEQVEVLQK		105.35	1144.07	2286.13	2	4.00149	109.237
	A0A1A7Z4A6;A0A0D9SGF6;A0A0P7V2T7;A0A0P7VEP4;A0A0R4IJ08;A0A0S7GFS2;A0A0S7GFS3;A0A0S7GGW7;A0A0S7GI92;A0A0S7GKU3;A0A1A7WGD9;A0A1A8AIC9;A0A1A8DRB6;A0A1A8GCR2;A0A1A8KF62;A0A1A8MAY9;A0A1A8MXE6;A0A1A8QNY9;A0A1A8RNY5;A0A1A8SFC1;A0A1A8UI02;A0A060XII9;A0A060XJX9;A0A087XQU7;A0A146NIU7;A0A146Q523;A0A146Z4J7;A0A146Z4L3;A0A146Z4P1;A0A146Z6F5;A0A146Z650;C0PUV6;F1R443;F1R445;F1R446;F8K8N3;G3Q393;G3Q398;H2MBY2;H2…	12.4474	0.768997	KIEDLGAAMEEALILDNK		99.23	658.351	1972.03	3	5.84731	152.693
	A0A1A7Z4A6;A0A0D9SGF6;A0A0P7V2T7;A0A0P7VEP4;A0A0R4IJ08;A0A0S7GFR3;A0A0S7GFS2;A0A0S7GG64;A0A0S7GKU3;A0A0S7GLM7;A0A1A7WGD9;A0A1A8D2Q6;A0A1A8GCR2;A0A1A8I584;A0A1A8KR84;A0A1A8MXE6;A0A1A8QNY9;A0A1A8SFC1;A0A060XII9;A0A060XJX9;A0A146NIL5;A0A146NIU7;A0A146NJR6;A0A146Q523;A0A146Z4H1;A0A146Z4J7;A0A146Z4K2;A0A146Z4L3;A0A146Z4P1;A0A146Z5L2;A0A146Z6F5;A0A146Z650;F1R443;F1R446;G3Q393;G3Q398;H2UIB0;H2UIB1;H3CBT…	1.03818	2427.31	QQVAPTDDETGKELVLALYDYQEK		96.33	918.458	2752.35	3	4.07101	131.026
	A0A1A7Z4A6;A0A0D9SGF6;A0A0P7V2T7;A0A0R4IJ08;A0A0S7GFR3;A0A0S7GFS2;A0A0S7GG64;A0A0S7GKU3;A0A0S7GLM7;A0A1A7WGD9;A0A1A8D2Q6;A0A1A8D8C3;A0A1A8GCR2;A0A1A8I584;A0A1A8KR84;A0A1A8MAY9;A0A1A8RNY5;A0A1A8SFC1;A0A060XII9;A0A060XJX9;A0A087XQU7;F1R443;F1R446;G3Q393;G3Q398;H2MBY2;I3JZ89;I3JZ90;M4A8R0;Q13813;W5KTF3;W5KTG2;W5MFM2;W5MFP4	1.03818	1.24516	RQDLEDSLQAQQYFADANEAESWMR		95.41	1001.12	3000.34	3	4.19052	134.37
	A0A1A7Z4A6;A0A0R4IJ08;A0A0S7GFQ2;A0A0S7GFQ8;A0A0S7GFR3;A0A0S7GFS1;A0A0S7GFS2;A0A0S7GFS3;A0A0S7GG64;A0A0S7GGW2;A0A0S7GGW7;A0A0S7GI92;A0A0S7GKU3;A0A0S7GLM7;A0A0S7GLW5;A0A0S7GNH5;A0A1A7WGD9;A0A1A8AIC9;A0A1A8DRB6;A0A1A8GCR2;A0A1A8KF62;A0A1A8MAY9;A0A1A8MXE6;A0A1A8QNY9;A0A1A8RNY5;A0A1A8SFC1;A0A1A8UI02;A0A060XII9;A0A087XQU7;A0A146NIL5;A0A146NIU7;A0A146NJR6;A0A146Q523;A0A146Z4H1;A0A146Z4J7;A0A146Z4K2;A0A…	1.47246	0.92686	GVIDTGNALIQR		93.15	628.853	1255.69	2	1.68535	71.0409
	A0A1A7Z4A6;A0A0P7VEP4;A0A0S7GFQ8;A0A0S7GFR3;A0A0S7GFS1;A0A0S7GFS2;A0A0S7GFS3;A0A0S7GFT9;A0A0S7GG64;A0A0S7GGW2;A0A0S7GGW7;A0A0S7GKU3;A0A0S7GLM7;A0A0S7GNH5;A0A1A7WGD9;A0A1A8AIC9;A0A1A8DRB6;A0A1A8GCR2;A0A1A8KF62;A0A1A8MAY9;A0A1A8MXE6;A0A1A8QNY9;A0A1A8RNY5;A0A1A8SFC1;A0A1A8UI02;A0A060XII9;A0A060XJX9;A0A087XQU7;I3JZ89;I3JZ90;M4A8R0;W5KTF3;W5KTG2	71.7992	2.98086	AGTFQAFEQFGQQLLAR		92.56	637.998	1910.97	3	6.14205	169.011
	A0A1A7Z4A6;A0A0D9SGF6;A0A0P7V2T7;A0A0P7VEP4;A0A0R4IJ08;A0A1A7WGD9;A0A1A8D2Q6;A0A1A8D8C3;A0A1A8GCR2;A0A1A8I584;A0A1A8KR84;A0A1A8MAY9;A0A1A8QC83;A0A1A8SFC1;A0A1A8UI02;A0A060XII9;A0A060XJX9;A0A087XQU7;A0A146Q523;A0A146Z4H1;A0A146Z4J7;A0A146Z4K2;A0A146Z4L3;A0A146Z4P1;A0A146Z5L2;A0A146Z6F5;A0A146Z650;F1R443;F1R446;G3Q393;G3Q398;H2MBY2;H2UIA9;H2UIB0;H2UIB1;H3C0G3;H3CBT9;I3JZ89;I3JZ90;M4A8R0;Q4T9R4;Q4T9…	1.02938	1.07542	HQAFEAELSANQSR		92.43	529.923	1586.75	3	4.18109	40.423
	A0A1A7Z4A6;A0A0D9SFH4;A0A0D9SGF6;A0A0P7V2T7;A0A0P7VEP4;A0A0R4IJ08;A0A0S7GFS2;A0A0S7GFS3;A0A0S7GGW7;A0A0S7GI92;A0A0S7GKU3;A0A1A7WGD9;A0A1A8AIC9;A0A1A8DRB6;A0A1A8GCR2;A0A1A8KF62;A0A1A8MAY9;A0A1A8MXE6;A0A1A8QNY9;A0A1A8RNY5;A0A1A8SFC1;A0A1A8UI02;A0A060XII9;A0A060XJX9;A0A087XQU7;A0A146NIU7;A0A146Q523;A0A146Z4J7;A0A146Z4L3;A0A146Z4P1;A0A146Z650;C0PUV6;F1R443;F1R445;F1R446;F8K8N3;G3Q393;G3Q398;H2MBY2;H2…	1.80805	0.865306	SSEEIESAFR		88.75	577.771	1153.53	2	-1.61916	51.3788
	A0A1A7Z4A6;A0A0P7VEP4;A0A0R4IJ08;A0A0S7GFS1;A0A0S7GFS2;A0A0S7GFS3;A0A0S7GG64;A0A0S7GGW2;A0A0S7GGW7;A0A0S7GI92;A0A0S7GKU3;A0A0S7GLM7;A0A0S7GLW5;A0A1A7WGD9;A0A1A8AIC9;A0A1A8DRB6;A0A1A8GCR2;A0A1A8KF62;A0A1A8MAY9;A0A1A8MXE6;A0A1A8QNY9;A0A1A8RNY5;A0A1A8SFC1;A0A1A8UI02;A0A060XII9;A0A060XJX9;A0A087XQU7;A0A146NIL5;A0A146NIU7;A0A146NJR6;A0A146Q523;A0A146Z4J7;A0A146Z4K2;A0A146Z4L3;A0A146Z4P1;A0A146Z6F5;A0A…	145.971	0.577478	QETFDAGLQAFQQEGITNITALK		88.67	841.766	2522.28	3	3.03161	153.268
	A0A1A7Z4A6;A0A0D9SGF6;A0A0P7VEP4;A0A0R4IJ08;A0A0S7GFS2;A0A0S7GFS3;A0A0S7GGW7;A0A0S7GI92;A0A0S7GKU3;A0A1A7WGD9;A0A1A8AIC9;A0A1A8DRB6;A0A1A8GCR2;A0A1A8KF62;A0A1A8MAY9;A0A1A8MXE6;A0A1A8QNY9;A0A1A8RNY5;A0A1A8SFC1;A0A1A8UI02;A0A060XII9;A0A060XJX9;A0A087XQU7;A0A146NIU7;A0A146Q523;A0A146Z4J7;A0A146Z4L3;A0A146Z4P1;A0A146Z6F5;A0A146Z650;C0PUV6;F1R443;F1R445;F1R446;F8K8N3;G3Q393;G3Q398;H2MBY2;H2UGD2;H3C0G3…	0.233289	0.00119199	YTEHSTVGLAQQWDQLDQLGMR		87.43	859.415	2575.22	3	5.41344	132.586
	A0A1A7Z4A6;A0A0D9SGF6;A0A0P7V2T7;A0A0R4IJ08;A0A1A7WGD9;A0A1A8D2Q6;A0A1A8GCR2;A0A1A8I584;A0A1A8KR84;A0A1A8MXE6;A0A1A8QNY9;A0A1A8SFC1;A0A060XII9;A0A060XJX9;F1R443;F1R446;G3Q393;G3Q398;Q13813;W5KTF3;W5KTG2	1.54542	1.00188	EANELQQWINEK		84.85	751.369	1500.72	2	1.77925	86.718
	A0A1A7Z4A6;A0A0D9SGF6;A0A0P7VEP4;A0A0R4IJ08;A0A0S7GFQ8;A0A0S7GFR3;A0A0S7GFS1;A0A0S7GFS2;A0A0S7GFS3;A0A0S7GFT9;A0A0S7GG64;A0A0S7GGW2;A0A0S7GGW7;A0A0S7GKU3;A0A0S7GLM7;A0A0S7GNH5;A0A1A7WGD9;A0A1A8AIC9;A0A1A8DRB6;A0A1A8GCR2;A0A1A8KF62;A0A1A8MAY9;A0A1A8MXE6;A0A1A8QNY9;A0A1A8RNY5;A0A1A8SFC1;A0A1A8UI02;A0A060XII9;A0A060XJX9;A0A087XQU7;A0A146NIL5;A0A146NIU7;A0A146NJR6;A0A146Q523;A0A146Z4H1;A0A146Z4J7;A0A…	639.152	1.0256	DCEQAENWMAAR	[2] Methylthio (C)	84.18	735.286	1468.56	2	4.578	79.8609
	A0A1A7Z4A6;A0A0R4IJ08;A0A0S7GFR3;A0A0S7GFS2;A0A0S7GG64;A0A0S7GKU3;A0A0S7GLM7;A0A1A7WGD9;A0A1A8D2Q6;A0A1A8D8C3;A0A1A8GCR2;A0A1A8I584;A0A1A8KR84;A0A1A8QNY9;A0A1A8SFC1;A0A060XII9;A0A060XJX9;A0A087XQU7;A0A146NIL5;A0A146NIU7;A0A146NJR6;A0A146Q523;A0A146Z4H1;A0A146Z4J7;A0A146Z4K2;A0A146Z4L3;A0A146Z4P1;A0A146Z5L2;A0A146Z6F5;A0A146Z650;F1R443;F1R446;H2UIA9;H2UIB0;H2UIB1;M4A8R0;W5KTF3;W5KTG2	1.21813	0.849124	EKEPIVGSPDYGKDEDSAEALLK		83.57	623.313	2489.22	4	0.933673	82.5533
	A0A1A7Z4A6;A0A0D9SGF6;A0A0P7V2T7;A0A0R4IJ08;A0A0S7GFR3;A0A0S7GFS1;A0A0S7GFS2;A0A0S7GFS3;A0A0S7GG64;A0A0S7GGW2;A0A0S7GGW7;A0A0S7GKU3;A0A0S7GLM7;A0A0S7GNH5;A0A1A7WGD9;A0A1A8AIC9;A0A1A8DRB6;A0A1A8GCR2;A0A1A8MAY9;A0A1A8MXE6;A0A1A8QNY9;A0A1A8RNY5;A0A1A8SFC1;A0A1A8UI02;A0A060XII9;A0A060XJX9;A0A087XQU7;A0A146NIL5;A0A146NIU7;A0A146NJR6;A0A146Q523;A0A146Z4H1;A0A146Z4J7;A0A146Z4K2;A0A146Z4L3;A0A146Z4P1;A0A…	342.749	49.8991	DADETKEWIEEK		83.48	746.846	1491.68	2	5.32486	44.8114
	A0A1A7Z4A6;A0A0D9SGF6;A0A0P7V2T7;A0A0P7VEP4;A0A0R4IJ08;A0A0S7GFQ8;A0A0S7GFR3;A0A0S7GFS1;A0A0S7GFS2;A0A0S7GFS3;A0A0S7GFT9;A0A0S7GG64;A0A0S7GGW2;A0A0S7GGW7;A0A0S7GKU3;A0A0S7GLM7;A0A0S7GNH5;A0A1A7WGD9;A0A1A8AIC9;A0A1A8DRB6;A0A1A8GCR2;A0A1A8KF62;A0A1A8MAY9;A0A1A8MXE6;A0A1A8QNY9;A0A1A8RNY5;A0A1A8SFC1;A0A1A8UI02;A0A060XII9;A0A060XJX9;A0A087XQU7;A0A146NIL5;A0A146NIU7;A0A146NJR6;A0A146Q523;A0A146Z4H1;A0A…	1.58256	1.52869	DVTGAEALLER		82.72	587.31	1172.6	2	3.83635	77.9559
	A0A1A7Z4A6;A0A0D9SGF6;A0A0P7V2T7;A0A0P7VEP4;A0A0R4IJ08;A0A1A7WGD9;A0A1A8D2Q6;A0A1A8D8C3;A0A1A8GCR2;A0A1A8I584;A0A1A8KR84;A0A1A8MAY9;A0A1A8QC83;A0A1A8SFC1;A0A1A8UI02;A0A060XII9;A0A060XJX9;A0A087XQU7;A0A146Q523;A0A146Z4H1;A0A146Z4J7;A0A146Z4K2;A0A146Z4L3;A0A146Z4P1;A0A146Z5L2;A0A146Z6F5;A0A146Z650;F1R443;F1R446;G3Q393;G3Q398;H2MBY2;H2UIA9;H2UIB0;H2UIB1;H3C0G3;H3CBT9;I3JZ89;I3JZ90;M4A8R0;Q4T9R4;Q4T9…	1.36222	1.05396	HQAFEAELSANQSR		82.34	794.38	1586.75	2	3.32603	40.4952
	A0A1A7Z4A6;A0A0D9SGF6;A0A0P7V2T7;A0A0P7VEP4;A0A0R4IJ08;A0A0S7GKE8;A0A0S7GMT1;A0A0S7GQA6;A0A1A7WGD9;A0A1A8D2Q6;A0A1A8D8C3;A0A1A8GCR2;A0A1A8I584;A0A1A8KR84;A0A1A8MAY9;A0A1A8QC83;A0A1A8SFC1;A0A1A8UI02;A0A060XII9;A0A060XJX9;A0A087XQU7;A0A146Q523;A0A146Z4H1;A0A146Z4K2;A0A146Z4L3;A0A146Z4P1;A0A146Z5L2;A0A146Z6F5;F1R443;F1R446;G3Q393;G3Q398;H2MBY2;H2UIA9;H2UIB0;H2UIB1;H3C0G3;H3CBT9;I3JZ89;I3JZ90;M4A8R0;…	13.9598	12.7181	DLASVQALLR		82.27	543.319	1084.62	2	4.01573	111.985
	A0A1A7Z4A6;A0A0R4IJ08;A0A0S7GFS1;A0A0S7GFS2;A0A0S7GFS3;A0A0S7GG64;A0A0S7GGW2;A0A0S7GGW7;A0A0S7GI92;A0A0S7GKU3;A0A0S7GLM7;A0A0S7GLW5;A0A1A7WGD9;A0A1A8AIC9;A0A1A8DRB6;A0A1A8GCR2;A0A1A8KF62;A0A1A8MAY9;A0A1A8MXE6;A0A1A8QNY9;A0A1A8RNY5;A0A1A8SFC1;A0A1A8UI02;A0A060XII9;A0A060XJX9;A0A087XQU7;A0A146NIL5;A0A146NIU7;A0A146NJR6;A0A146Q523;A0A146Z4J7;A0A146Z4L3;A0A146Z4P1;A0A146Z6F5;A0A146Z650;C0PUV6;F1R443;…	0.00243808	1.43642	QETFDAGLQAFQQEGITNITALKDQLLAAK		81.55	1088.24	3261.69	3	0.395662	190.428
	A0A1A7Z4A6;A0A0D9SGF6;A0A0P7V2T7;A0A0P7VEP4;A0A0R4IJ08;A0A0S7GFS1;A0A0S7GFS2;A0A0S7GFS3;A0A0S7GG64;A0A0S7GGW2;A0A0S7GGW7;A0A0S7GI92;A0A0S7GKU3;A0A0S7GLM7;A0A0S7GLW5;A0A1A7WGD9;A0A1A8AIC9;A0A1A8DRB6;A0A1A8GCR2;A0A1A8KF62;A0A1A8MAY9;A0A1A8MXE6;A0A1A8QNY9;A0A1A8RNY5;A0A1A8SFC1;A0A1A8UI02;A0A060XII9;A0A060XJX9;A0A087XQU7;A0A146NIL5;A0A146NIU7;A0A146NJR6;A0A146Q523;A0A146Z4J7;A0A146Z4K2;A0A146Z4L3;A0A…	3.42187	0.776863	ADVVESWIGEK		80.45	616.814	1231.61	2	3.30561	81.7777
	A0A1A7Z4A6;A0A0S7GFS2;A0A0S7GFS3;A0A0S7GGW7;A0A0S7GI92;A0A0S7GKU3;A0A1A7WGD9;A0A1A8AIC9;A0A1A8DRB6;A0A1A8GCR2;A0A1A8KF62;A0A1A8MAY9;A0A1A8MXE6;A0A1A8QNY9;A0A1A8RNY5;A0A1A8SFC1;A0A1A8UI02;A0A060XII9;A0A060XJX9;A0A146NIU7;A0A146Q523;A0A146Z4J7;A0A146Z4L3;A0A146Z4P1;A0A146Z6F5;A0A146Z650;C0PUV6;F1R446;G3Q393;G3Q398;H2MBY2;H3C0G3;H3CBT9;I3JZ89;Q13813;W5KTG2;W5MFM2	3.63141	5.60988	TYLLDGSCMVEESGTLESQLEATKR	[8] Methylthio (C)	79.79	936.109	2805.3	3	4.90607	152.98
	A0A1A7Z4A6;A0A0D9SGF6;A0A0P7V2T7;A0A0P7VEP4;A0A0R4IJ08;A0A0S7GKE8;A0A0S7GMT1;A0A0S7GQA6;A0A1A7WGD9;A0A1A8D2Q6;A0A1A8D8C3;A0A1A8GCR2;A0A1A8I584;A0A1A8KR84;A0A1A8MAY9;A0A1A8QC83;A0A1A8SFC1;A0A1A8UI02;A0A060XII9;A0A060XJX9;A0A087XQU7;A0A146Q523;A0A146Z4H1;A0A146Z4K2;A0A146Z4L3;A0A146Z4P1;A0A146Z5L2;A0A146Z6F5;A0A146Z650;F1R443;F1R446;G3Q393;G3Q398;H2MBY2;H2UIA9;H2UIB0;H2UIB1;H3C0G3;H3CBT9;I3JZ89;I3J…	4.51153	0.892071	DTEQVDNWMSK		79.45	676.796	1351.58	2	5.05027	55.3468
	A0A1A7Z4A6;A0A1A7WGD9;A0A1A8D2Q6;A0A1A8GCR2;A0A1A8I584;A0A1A8KR84;A0A1A8MXE6;A0A1A8QNY9;A0A1A8SFC1;A0A060XII9;A0A060XJX9;W5KTF3;W5KTG2	4.24954	2.61477	EGALTNEEVGSDLEQVEVLQK		79.15	763.052	2286.13	3	6.33243	109.237
	A0A1A7Z4A6;A0A0R4IJ08;A0A0S7GFS1;A0A0S7GFS2;A0A0S7GFS3;A0A0S7GG64;A0A0S7GGW2;A0A0S7GGW7;A0A0S7GI92;A0A0S7GKU3;A0A0S7GLM7;A0A0S7GLW5;A0A1A7WGD9;A0A1A8AIC9;A0A1A8DRB6;A0A1A8GCR2;A0A1A8KF62;A0A1A8MAY9;A0A1A8MXE6;A0A1A8QNY9;A0A1A8RNY5;A0A1A8SFC1;A0A1A8UI02;A0A060XII9;A0A060XJX9;A0A087XQU7;A0A146NIL5;A0A146NIU7;A0A146NJR6;A0A146Q523;A0A146Z4J7;A0A146Z4L3;A0A146Z4P1;A0A146Z6F5;A0A146Z650;C0PUV6;F1R443;…	1158.65	1.01947	QETFDAGLQAFQQEGITNITALKDQLLAAK		78.96	816.434	3261.71	4	4.85996	190.921
	A0A1A7Z4A6;A0A0R4IJ08;A0A0S7GFS1;A0A0S7GFS2;A0A0S7GFS3;A0A0S7GG64;A0A0S7GGW2;A0A0S7GGW7;A0A0S7GI92;A0A0S7GKU3;A0A0S7GLM7;A0A0S7GLW5;A0A1A7WGD9;A0A1A8AIC9;A0A1A8DRB6;A0A1A8GCR2;A0A1A8KF62;A0A1A8MAY9;A0A1A8MXE6;A0A1A8QNY9;A0A1A8RNY5;A0A1A8SFC1;A0A1A8UI02;A0A060XII9;A0A060XJX9;A0A087XQU7;A0A146NIL5;A0A146NIU7;A0A146NJR6;A0A146Q523;A0A146Z4J7;A0A146Z4L3;A0A146Z4P1;A0A146Z6F5;A0A146Z650;C0PUV6;F1R443;…	176.05	1.01947	QETFDAGLQAFQQEGITNITALKDQLLAAK	[N-term] Gln->pyro-Glu (N-term Q)	77.51	1082.57	3244.68	3	4.79505	192.126
	A0A1A7Z4A6;A0A0P7VEP4;A0A0R4IJ08;A0A0S7GKQ9;A0A0S7GMT1;A0A0S7GRJ6;A0A1A7WGD9;A0A1A8D2Q6;A0A1A8D8C3;A0A1A8GCR2;A0A1A8I584;A0A1A8KR84;A0A1A8MAY9;A0A1A8QC83;A0A1A8SFC1;A0A1A8UI02;A0A060XII9;A0A087XQU7;A0A146Q523;A0A146Z4H1;A0A146Z4K2;A0A146Z4L3;A0A146Z4P1;A0A146Z5L2;A0A146Z6F5;A0A146Z650;F1R443;F1R446;G3Q393;G3Q398;H2UIA9;H2UIB0;H2UIB1;H3C0G3;H3CBT9;I3JZ89;I3JZ90;M4A8R0;Q4T9R4;Q4T9R5;W5KTF3;W5KTG2;W…	1.19251	1.01947	RAALEDSFHLQQFFR		77.08	622.323	1863.95	3	3.76403	124.952
	A0A1A7Z4A6;A0A0R4IJ08;A0A0S7GFR3;A0A0S7GFS3;A0A0S7GG64;A0A0S7GGW2;A0A0S7GKU3;A0A0S7GNH5;A0A1A7WGD9;A0A1A8AIC9;A0A1A8DRB6;A0A1A8GCR2;A0A1A8KF62;A0A1A8MAY9;A0A1A8MXE6;A0A1A8QNY9;A0A1A8RNY5;A0A1A8SFC1;A0A1A8UI02;A0A060XII9;A0A060XJX9;A0A087XQU7;A0A146NIL5;A0A146NIU7;A0A146NJR6;A0A146Z4H1;A0A146Z4P1;F1R446;G3Q398;H2MBY2;H2UIB0;I3JZ89;M4A8R0;W5KTF3;W5KTG2;W5MFM2;W5MFP4	1.81363	0.890157	LQTATDESYKDPTNIQLSK		77.03	718.032	2151.07	3	1.28737	63.1219
	A0A1A7Z4A6;A0A0D9SGF6;A0A0P7V2T7;A0A0P7VEP4;A0A0R4IJ08;A0A0S7GFS1;A0A0S7GFS2;A0A0S7GFS3;A0A0S7GG64;A0A0S7GGW2;A0A0S7GGW7;A0A0S7GI92;A0A0S7GKU3;A0A0S7GLM7;A0A0S7GLW5;A0A1A7WGD9;A0A1A8AIC9;A0A1A8DRB6;A0A1A8GCR2;A0A1A8KF62;A0A1A8MAY9;A0A1A8MXE6;A0A1A8QNY9;A0A1A8RNY5;A0A1A8SFC1;A0A1A8UI02;A0A060XII9;A0A060XJX9;A0A087XQU7;A0A146NIL5;A0A146NIU7;A0A146NJR6;A0A146Q523;A0A146Z4J7;A0A146Z4K2;A0A146Z4L3;A0A…	1.51824	0.852764	DLSSVQTLLTK		76.54	602.844	1203.67	2	2.8522	99.131
	A0A1A7Z4A6;A0A0P7VEP4;A0A0R4IJ08;A0A0S7GKQ9;A0A0S7GMT1;A0A0S7GRJ6;A0A1A7WGD9;A0A1A8D2Q6;A0A1A8D8C3;A0A1A8GCR2;A0A1A8I584;A0A1A8KR84;A0A1A8MAY9;A0A1A8QC83;A0A1A8SFC1;A0A1A8UI02;A0A060XII9;A0A060XJX9;A0A087XQU7;A0A146Q523;A0A146Z4H1;A0A146Z4K2;A0A146Z4L3;A0A146Z4P1;A0A146Z5L2;A0A146Z6F5;A0A146Z650;F1R443;F1R446;G3Q393;G3Q398;H2MBY2;H2UIA9;H2UIB0;H2UIB1;H3C0G3;H3CBT9;I3JZ89;I3JZ90;M4A8R0;Q4T9R4;Q4T9…	1.13379	1.01947	DSDELKSWINEK		75.04	732.356	1462.7	2	5.36109	70.5467
	A0A1A7Z4A6;A0A0D9SGF6;A0A0P7V2T7;A0A0P7VEP4;A0A0R4IJ08;A0A0S7GFS1;A0A0S7GFS2;A0A0S7GFS3;A0A0S7GG64;A0A0S7GGW2;A0A0S7GGW7;A0A0S7GI92;A0A0S7GKU3;A0A0S7GLM7;A0A0S7GLW5;A0A1A7WGD9;A0A1A8AIC9;A0A1A8DRB6;A0A1A8GCR2;A0A1A8KF62;A0A1A8MAY9;A0A1A8MXE6;A0A1A8QNY9;A0A1A8RNY5;A0A1A8SFC1;A0A1A8UI02;A0A060XII9;A0A060XJX9;A0A087XQU7;A0A146NIL5;A0A146NIU7;A0A146NJR6;A0A146Q523;A0A146Z4J7;A0A146Z4K2;A0A146Z4L3;A0A…	1.03818	0.845309	ASAFNSWFENAEEDLTDPVR		74.24	1149.52	2297.03	2	4.16893	161.833
	A0A1A7Z4A6;A0A0D9SGF6;A0A0P7VEP4;A0A0R4IJ08;A0A0S7GFR3;A0A0S7GFS2;A0A0S7GG64;A0A0S7GKU3;A0A0S7GLM7;A0A1A7WGD9;A0A1A8D2Q6;A0A1A8GCR2;A0A1A8I584;A0A1A8KR84;A0A1A8MXE6;A0A1A8QNY9;A0A1A8SFC1;A0A060XII9;A0A146NIL5;A0A146NIU7;A0A146NJR6;A0A146Q523;A0A146Z4H1;A0A146Z4J7;A0A146Z4K2;A0A146Z4L3;A0A146Z4P1;A0A146Z5L2;A0A146Z6F5;A0A146Z650;F1R443;F1R446;G3Q393;G3Q398;H2MBY2;H2UIA9;H2UIB0;H2UIB1;H3C0G3;H3CBT9…	9.89134	42.8179	KGDILTLLNSTNKDWWK		73.99	678.035	2031.08	3	1.34542	153.628
	A0A1A7Z4A6;A0A0D9SGF6;A0A0P7VEP4;A0A0R4IJ08;A0A0S7GKE8;A0A0S7GMT1;A0A0S7GQA6;A0A1A7WGD9;A0A1A8D2Q6;A0A1A8D8C3;A0A1A8GCR2;A0A1A8I584;A0A1A8KR84;A0A1A8MAY9;A0A1A8QC83;A0A1A8SFC1;A0A1A8UI02;A0A060XII9;A0A060XJX9;A0A087XQU7;A0A146Q523;A0A146Z4H1;A0A146Z4K2;A0A146Z4L3;A0A146Z4P1;A0A146Z5L2;A0A146Z6F5;A0A146Z650;F1R443;F1R446;G3Q393;G3Q398;I3JZ89;I3JZ90;M4A8R0;Q566W8;Q13813;W5KTF3;W5KTG2;W5MFM2;W5MFP4	2.07143	0.191413	DLTSWVTEMK		73.73	605.296	1208.58	2	6.47796	114.66
	A0A1A7Z4A6;A0A0P7VEP4;A0A1A8D2Q6;A0A1A8D8C3;A0A1A8GCR2;A0A1A8I584;A0A1A8KR84;A0A1A8MAY9;A0A1A8QC83;A0A1A8SFC1;A0A1A8UI02;A0A060XII9;A0A060XJX9;G3Q393;G3Q398;W5MFM2;W5MFP4	375.95	325.392	HQAFEAEVQANAGAIIK		72.73	599.649	1795.92	3	2.76581	83.9641
	A0A1A7Z4A6;A0A0R4IJ08;A0A0S7GFQ8;A0A0S7GFR3;A0A0S7GFS1;A0A0S7GFS2;A0A0S7GFS3;A0A0S7GFT9;A0A0S7GG64;A0A0S7GGW2;A0A0S7GGW7;A0A0S7GKU3;A0A0S7GLM7;A0A0S7GNH5;A0A1A7WGD9;A0A1A8AIC9;A0A1A8DRB6;A0A1A8GCR2;A0A1A8KF62;A0A1A8MAY9;A0A1A8MXE6;A0A1A8QNY9;A0A1A8RNY5;A0A1A8SFC1;A0A1A8UI02;A0A060XII9;A0A060XJX9;A0A087XQU7;A0A146NIL5;A0A146NIU7;A0A146NJR6;A0A146Q523;A0A146Z4H1;A0A146Z4J7;A0A146Z4K2;A0A146Z4L3;A0A…	1.2166	0.487952	EAFLASDDKGDSLDSVEALIK		71.06	741.709	2222.11	3	2.41343	138.153
	A0A1A7Z4A6;A0A0D9SGF6;A0A0P7V2T7;A0A0P7VEP4;A0A0R4IJ08;A0A0S7GFS2;A0A0S7GFS3;A0A0S7GGW7;A0A0S7GI92;A0A0S7GKU3;A0A1A7WGD9;A0A1A8AIC9;A0A1A8DRB6;A0A1A8GCR2;A0A1A8KF62;A0A1A8MAY9;A0A1A8MXE6;A0A1A8QNY9;A0A1A8RNY5;A0A1A8SFC1;A0A1A8UI02;A0A060XII9;A0A060XJX9;A0A087XQU7;A0A146NIU7;A0A146Q523;A0A146Z4J7;A0A146Z4L3;A0A146Z4P1;A0A146Z6F5;A0A146Z650;C0PUV6;F1R443;F1R445;F1R446;F8K8N3;G3Q393;G3Q398;H2MBY2;H2…	748.413	24.6248	KIEDLGAAMEEALILDNK		70.83	987.022	1972.03	2	5.20131	152.693
	A0A1A7Z4A6;A0A0D9SGF6;A0A0P7V2T7;A0A0P7VEP4;A0A0R4IJ08;A0A0S7GFR3;A0A0S7GFS2;A0A0S7GG64;A0A0S7GKU3;A0A0S7GLM7;A0A1A7WGD9;A0A1A8D2Q6;A0A1A8GCR2;A0A1A8I584;A0A1A8KR84;A0A1A8MAY9;A0A1A8SFC1;A0A060XII9;A0A060XJX9;A0A087XQU7;A0A146NIL5;A0A146NIU7;A0A146NJR6;A0A146Q523;A0A146Z4H1;A0A146Z4J7;A0A146Z4L3;A0A146Z4P1;A0A146Z5L2;A0A146Z6F5;A0A146Z650;F1R443;F1R446;G3Q393;G3Q398;H2MBY2;H2UIA9;H2UIB0;H2UIB1;H3…	0.646554	0.72502	GKDLIGVQNLLK		69.7	649.397	1296.78	2	-1.08841	96.0961
	A0A1A7Z4A6;A0A0R4IJ08;A0A0S7GFR3;A0A0S7GFS2;A0A0S7GG64;A0A0S7GKU3;A0A0S7GLM7;A0A1A7WGD9;A0A1A8D2Q6;A0A1A8D8C3;A0A1A8GCR2;A0A1A8I584;A0A1A8KR84;A0A1A8QNY9;A0A1A8SFC1;A0A060XII9;A0A060XJX9;A0A087XQU7;A0A146NIL5;A0A146NIU7;A0A146NJR6;A0A146Q523;A0A146Z4H1;A0A146Z4J7;A0A146Z4K2;A0A146Z4L3;A0A146Z4P1;A0A146Z5L2;A0A146Z6F5;A0A146Z650;F1R443;F1R446;H2UIA9;H2UIB0;H2UIB1;M4A8R0;W5KTF3;W5KTG2	1.86448	25.3728	EKEPIVGSPDYGKDEDSAEALLK		67.62	830.747	2489.22	3	-0.0692612	82.4828
	A0A1A7Z4A6;A0A0D9SGF6;A0A0P7VEP4;A0A0R4IJ08;A0A0S7GFR3;A0A0S7GFS1;A0A0S7GFS2;A0A0S7GFS3;A0A0S7GG64;A0A0S7GGW2;A0A0S7GGW7;A0A0S7GKU3;A0A0S7GLM7;A0A0S7GNH5;A0A1A7WGD9;A0A1A8AIC9;A0A1A8DRB6;A0A1A8GCR2;A0A1A8KF62;A0A1A8MAY9;A0A1A8MXE6;A0A1A8QNY9;A0A1A8RNY5;A0A1A8SFC1;A0A1A8UI02;A0A060XII9;A0A060XJX9;A0A087XQU7;A0A146NIL5;A0A146NIU7;A0A146NJR6;A0A146Q523;A0A146Z4H1;A0A146Z4J7;A0A146Z4K2;A0A146Z4L3;A0A…	1.68847	1.87492	DLMSWINGIR		67.46	602.812	1203.61	2	-0.298836	155.21
	A0A1A7Z4A6;A0A0D9SGF6;A0A0P7V2T7;A0A0P7VEP4;A0A0R4IJ08;A0A0S7GFS1;A0A0S7GFS2;A0A0S7GFS3;A0A0S7GG64;A0A0S7GGW2;A0A0S7GGW7;A0A0S7GI92;A0A0S7GKU3;A0A0S7GLM7;A0A0S7GLW5;A0A1A7WGD9;A0A1A8AIC9;A0A1A8DRB6;A0A1A8GCR2;A0A1A8KF62;A0A1A8MAY9;A0A1A8MXE6;A0A1A8QNY9;A0A1A8RNY5;A0A1A8SFC1;A0A1A8UI02;A0A060XII9;A0A060XJX9;A0A087XQU7;A0A146NIL5;A0A146NIU7;A0A146NJR6;A0A146Q523;A0A146Z4J7;A0A146Z4K2;A0A146Z4L3;A0A…	44.1651	0.424204	ASAFNSWFENAEEDLTDPVR		66.91	766.686	2297.04	3	6.9364	164.274
	A0A1A7Z4A6;A0A1A7WGD9;A0A1A8AIC9;A0A1A8DRB6;A0A1A8GCR2;A0A1A8KF62;A0A1A8MAY9;A0A1A8MXE6;A0A1A8QNY9;A0A1A8RNY5;A0A1A8SFC1;A0A1A8UI02;A0A060XII9;A0A060XJX9;G3Q393;G3Q398;H2MBY2;H2UIA9;H2UIB0;H2UIB1;H3C0G3;H3CBT9;I3JZ89;I3JZ90;Q4T9R4;W5KTF3;W5KTG2	1.11623	0.116383	GHYASPEIQQK		66.23	419.88	1256.62	3	6.94991	21.7151
	A0A1A7Z4A6;A0A0D9SGF6;A0A0P7V2T7;A0A0P7VEP4;A0A0R4IJ08;A0A0S7GFR3;A0A0S7GFS2;A0A0S7GG64;A0A0S7GKU3;A0A0S7GLM7;A0A1A7WGD9;A0A1A8D2Q6;A0A1A8D8C3;A0A1A8GCR2;A0A1A8I584;A0A1A8KR84;A0A1A8MAY9;A0A1A8QC83;A0A1A8SFC1;A0A060XJX9;A0A087XQU7;A0A146NIL5;A0A146NIU7;A0A146NJR6;A0A146Q523;A0A146Z4H1;A0A146Z4J7;A0A146Z4K2;A0A146Z4L3;A0A146Z4P1;A0A146Z5L2;A0A146Z6F5;A0A146Z650;F1R443;F1R446;G3Q393;G3Q398;H2MBY2;H…	1.77112	0.00401734	DVEDEETWIR		65.86	646.296	1290.58	2	5.49503	68.6247
	A0A1A7Z4A6;A0A0P7VEP4;A0A0R4IJ08;A0A0S7GFS1;A0A0S7GFS2;A0A0S7GFS3;A0A0S7GG64;A0A0S7GGW2;A0A0S7GGW7;A0A0S7GI92;A0A0S7GKU3;A0A0S7GLM7;A0A0S7GLW5;A0A1A7WGD9;A0A1A8AIC9;A0A1A8DRB6;A0A1A8GCR2;A0A1A8KF62;A0A1A8MAY9;A0A1A8MXE6;A0A1A8QNY9;A0A1A8RNY5;A0A1A8SFC1;A0A1A8UI02;A0A060XII9;A0A060XJX9;A0A087XQU7;A0A146NIL5;A0A146NIU7;A0A146NJR6;A0A146Q523;A0A146Z4J7;A0A146Z4K2;A0A146Z4L3;A0A146Z4P1;A0A146Z6F5;A0A…	357.792	2.6172	CNSLEEIR	[1] Methylthio (C)	65.69	505.229	1008.44	2	4.26409	42.7674
	A0A1A7Z4A6;A0A0D9SGF6;A0A0P7V2T7;A0A0P7VEP4;A0A0R4IJ08;A0A0S7GKQ9;A0A0S7GMT1;A0A0S7GRJ6;A0A1A7WGD9;A0A1A8D2Q6;A0A1A8D8C3;A0A1A8GCR2;A0A1A8I584;A0A1A8KR84;A0A1A8MAY9;A0A1A8QC83;A0A1A8SFC1;A0A1A8UI02;A0A060XII9;A0A060XJX9;A0A087XQU7;A0A146Q523;A0A146Z4H1;A0A146Z4K2;A0A146Z4L3;A0A146Z4P1;A0A146Z5L2;A0A146Z6F5;A0A146Z650;F1R443;F1R446;G3Q393;G3Q398;H2MBY2;H2UIA9;H2UIB0;H2UIB1;H3C0G3;H3CBT9;I3JZ89;I3J…	0.821047	1.11662	ITALDEFATK		65	554.791	1107.57	2	-11.0637	72.3097
	A0A1A7Z4A6;A0A0P7VEP4;A0A0R4IJ08;A0A0S7GFQ2;A0A0S7GFQ8;A0A0S7GFR3;A0A0S7GFS1;A0A0S7GFS2;A0A0S7GFS3;A0A0S7GG64;A0A0S7GGW2;A0A0S7GGW7;A0A0S7GI92;A0A0S7GKU3;A0A0S7GLM7;A0A0S7GLW5;A0A0S7GNH5;A0A1A7WGD9;A0A1A8AIC9;A0A1A8DRB6;A0A1A8GCR2;A0A1A8KF62;A0A1A8MAY9;A0A1A8MXE6;A0A1A8QNY9;A0A1A8RNY5;A0A1A8SFC1;A0A1A8UI02;A0A060XII9;A0A060XJX9;A0A087XQU7;A0A146NIL5;A0A146NIU7;A0A146NJR6;A0A146Q523;A0A146Z4J7;A0A…	1.55949	1.01947	DLDDEESWIKEK		64.98	502.906	1505.7	3	3.79862	67.8497
	A0A1A7Z4A6;A0A0D9SGF6;A0A0P7V2T7;A0A0P7VEP4;A0A0R4IJ08;A0A0S7GFS2;A0A0S7GFS3;A0A0S7GGW7;A0A0S7GI92;A0A0S7GKU3;A0A1A7WGD9;A0A1A8AIC9;A0A1A8DRB6;A0A1A8GCR2;A0A1A8KF62;A0A1A8MAY9;A0A1A8MXE6;A0A1A8QNY9;A0A1A8RNY5;A0A1A8SFC1;A0A1A8UI02;A0A060XII9;A0A060XJX9;A0A087XQU7;A0A146NIU7;A0A146Q523;A0A146Z4J7;A0A146Z4L3;A0A146Z4P1;A0A146Z6F5;A0A146Z650;C0PUV6;F1R443;F1R445;F1R446;F8K8N3;G3Q393;G3Q398;H2MBY2;H2…	0.00150252	0.0161301	MQHNLEQQIQAR		63.72	499.254	1494.74	3	-0.210263	31.0477
	A0A1A7Z4A6;A0A0P7VEP4;A0A0R4IJ08;A0A0S7GFR3;A0A0S7GFS1;A0A0S7GFS2;A0A0S7GFS3;A0A0S7GG64;A0A0S7GGW2;A0A0S7GGW7;A0A0S7GKU3;A0A0S7GLM7;A0A0S7GNH5;A0A1A7WGD9;A0A1A8AIC9;A0A1A8DRB6;A0A1A8GCR2;A0A1A8KF62;A0A1A8MAY9;A0A1A8MXE6;A0A1A8QNY9;A0A1A8RNY5;A0A1A8SFC1;A0A1A8UI02;A0A060XII9;A0A060XJX9;A0A087XQU7;A0A146NIL5;A0A146NIU7;A0A146NJR6;A0A146Q523;A0A146Z4H1;A0A146Z4J7;A0A146Z4K2;A0A146Z4L3;A0A146Z4P1;A0A…	1.51961	32.2562	LIQSHPEAVDDIQEK		63.33	574.629	1720.86	3	2.61635	42.2722
	A0A1A7Z4A6;A0A0P7V2T7;A0A0P7VEP4;A0A0R4IJ08;A0A0S7GKE8;A0A0S7GMT1;A0A0S7GQA6;A0A1A7WGD9;A0A1A8D2Q6;A0A1A8D8C3;A0A1A8GCR2;A0A1A8I584;A0A1A8KR84;A0A1A8MAY9;A0A1A8QC83;A0A1A8SFC1;A0A1A8UI02;A0A060XII9;A0A060XJX9;A0A087XQU7;A0A146Q523;A0A146Z4H1;A0A146Z4K2;A0A146Z4L3;A0A146Z4P1;A0A146Z5L2;A0A146Z6F5;A0A146Z650;F1R443;F1R446;G3Q393;G3Q398;H2MBY2;I3JZ89;I3JZ90;M4A8R0;Q566W8;W5KTF3;W5KTG2;W5MFM2;W5MFP4	4.7557	1.01947	ALINADELANDVAGAEALLDR		63.3	1077.56	2153.1	2	2.01469	185.541
	A0A1A7Z4A6;A0A0D9SGF6;A0A0P7VEP4;A0A0R4IJ08;A0A0S7GFR3;A0A0S7GFS2;A0A0S7GG64;A0A0S7GKU3;A0A0S7GLM7;A0A1A7WGD9;A0A1A8D2Q6;A0A1A8D8C3;A0A1A8GCR2;A0A1A8I584;A0A1A8KR84;A0A1A8MAY9;A0A1A8QC83;A0A1A8SFC1;A0A1A8UI02;A0A060XII9;A0A060XJX9;A0A087XQU7;A0A146NJR6;A0A146Q523;A0A146Z4H1;A0A146Z4J7;A0A146Z4K2;A0A146Z4L3;A0A146Z4P1;A0A146Z5L2;A0A146Z6F5;A0A146Z650;F1R443;F1R446;G3Q393;G3Q398;H2MBY2;H2UIA9;H2UIB…	0.908829	0.475904	HALLEADVAAHQDR		62.69	515.936	1544.79	3	10.1322	40.423
	A0A1A7Z4A6;A0A0R4IJ08;A0A0S7GFQ8;A0A0S7GFR3;A0A0S7GFS1;A0A0S7GFS2;A0A0S7GFS3;A0A0S7GFT9;A0A0S7GG64;A0A0S7GGW2;A0A0S7GGW7;A0A0S7GKU3;A0A0S7GLM7;A0A0S7GNH5;A0A1A7WGD9;A0A1A8AIC9;A0A1A8DRB6;A0A1A8GCR2;A0A1A8KF62;A0A1A8MAY9;A0A1A8MXE6;A0A1A8QNY9;A0A1A8RNY5;A0A1A8SFC1;A0A1A8UI02;A0A060XII9;A0A060XJX9;A0A087XQU7;A0A146NIL5;A0A146NIU7;A0A146NJR6;A0A146Q523;A0A146Z4H1;A0A146Z4J7;A0A146Z4K2;A0A146Z4L3;A0A…	1.64574	1.01947	EAFLASDDKGDSLDSVEALIK		62.33	1112.06	2222.1	2	1.50482	138.153
	A0A1A7Z4A6;A0A0D9SGF6;A0A0P7VEP4;A0A0R4IJ08;A0A0S7GFQ2;A0A0S7GFQ8;A0A0S7GFR3;A0A0S7GFS1;A0A0S7GFS2;A0A0S7GFS3;A0A0S7GG64;A0A0S7GGW2;A0A0S7GGW7;A0A0S7GI92;A0A0S7GKU3;A0A0S7GLM7;A0A0S7GLW5;A0A0S7GNH5;A0A1A7WGD9;A0A1A8AIC9;A0A1A8DRB6;A0A1A8GCR2;A0A1A8KF62;A0A1A8MAY9;A0A1A8MXE6;A0A1A8QNY9;A0A1A8RNY5;A0A1A8SFC1;A0A1A8UI02;A0A060XII9;A0A060XJX9;A0A087XQU7;A0A146NIL5;A0A146NIU7;A0A146NJR6;A0A146Q523;A0A…	4.71858	1.01947	LEESLEYQQFVANVEEEEAWINEK		62.07	976.131	2925.37	3	4.07214	165.566
	A0A1A7Z4A6;A0A0P7VEP4;A0A0R4IJ08;A0A0S7GKQ9;A0A0S7GMT1;A0A0S7GRJ6;A0A1A7WGD9;A0A1A8D2Q6;A0A1A8D8C3;A0A1A8GCR2;A0A1A8I584;A0A1A8KR84;A0A1A8MAY9;A0A1A8QC83;A0A1A8SFC1;A0A1A8UI02;A0A060XII9;A0A087XQU7;A0A146Q523;A0A146Z4H1;A0A146Z4K2;A0A146Z4L3;A0A146Z4P1;A0A146Z5L2;A0A146Z6F5;A0A146Z650;F1R443;F1R446;G3Q393;G3Q398;H2UIA9;H2UIB0;H2UIB1;H3C0G3;H3CBT9;I3JZ89;I3JZ90;M4A8R0;Q4T9R4;Q4T9R5;W5KTF3;W5KTG2;W…	0.396837	0.831982	AALEDSFHLQQFFR		60.37	570.291	1707.85	3	6.80052	138.511
	A0A1A7Z4A6;A0A0P7VEP4;A0A0R4IJ08;A0A0S7GFQ2;A0A0S7GFQ8;A0A0S7GFR3;A0A0S7GFS1;A0A0S7GFS2;A0A0S7GFS3;A0A0S7GG64;A0A0S7GGW2;A0A0S7GGW7;A0A0S7GI92;A0A0S7GKU3;A0A0S7GLM7;A0A0S7GLW5;A0A0S7GNH5;A0A1A7WGD9;A0A1A8AIC9;A0A1A8DRB6;A0A1A8GCR2;A0A1A8KF62;A0A1A8MAY9;A0A1A8MXE6;A0A1A8QNY9;A0A1A8RNY5;A0A1A8SFC1;A0A1A8UI02;A0A060XII9;A0A060XJX9;A0A087XQU7;A0A146NIL5;A0A146NIU7;A0A146NJR6;A0A146Q523;A0A146Z4J7;A0A…	7.88007	0.0992557	DLDDEESWIK		60.1	625.285	1248.56	2	4.38244	78.0972
	A0A1A7Z4A6;A0A0P7V2T7;A0A0S7GFS1;A0A0S7GFS2;A0A0S7GFS3;A0A0S7GG64;A0A0S7GGW2;A0A0S7GGW7;A0A0S7GI92;A0A0S7GKU3;A0A0S7GLM7;A0A0S7GLW5;A0A1A7WGD9;A0A1A8AIC9;A0A1A8DRB6;A0A1A8GCR2;A0A1A8KF62;A0A1A8MAY9;A0A1A8MXE6;A0A1A8QNY9;A0A1A8RNY5;A0A1A8SFC1;A0A1A8UI02;A0A060XJX9;A0A146NIL5;A0A146NIU7;A0A146NJR6;A0A146Q523;A0A146Z4J7;A0A146Z4K2;A0A146Z4L3;A0A146Z4P1;A0A146Z6F5;A0A146Z650;C0PUV6;G3Q393;G3Q398;H2MB…	0.915266	0.700824	LLEAQEHFR		59.87	571.799	1141.58	2	-6.0651	40.3512
	A0A1A7Z4A6;A0A0D9SGF6;A0A0P7V2T7;A0A0P7VEP4;A0A0R4IJ08;A0A0S7GFQ2;A0A0S7GFQ8;A0A0S7GFR3;A0A0S7GFS1;A0A0S7GFS2;A0A0S7GFS3;A0A0S7GG64;A0A0S7GGW2;A0A0S7GGW7;A0A0S7GI92;A0A0S7GKU3;A0A0S7GLM7;A0A0S7GLW5;A0A0S7GNH5;A0A1A7WGD9;A0A1A8AIC9;A0A1A8DRB6;A0A1A8GCR2;A0A1A8KF62;A0A1A8MAY9;A0A1A8MXE6;A0A1A8QNY9;A0A1A8RNY5;A0A1A8SFC1;A0A1A8UI02;A0A060XII9;A0A060XJX9;A0A087XQU7;A0A146NIL5;A0A146NIU7;A0A146NJR6;A0A…	0.128867	41.2466	HQAFEAELHANADR		59.07	536.923	1607.75	3	3.95866	36.1187
	A0A1A7Z4A6;A0A0R4IJ08;A0A0S7GFR3;A0A0S7GFS1;A0A0S7GFS2;A0A0S7GFS3;A0A0S7GG64;A0A0S7GGW2;A0A0S7GGW7;A0A0S7GKU3;A0A0S7GLM7;A0A0S7GNH5;A0A1A7WGD9;A0A1A8AIC9;A0A1A8DRB6;A0A1A8GCR2;A0A1A8MAY9;A0A1A8MXE6;A0A1A8QNY9;A0A1A8RNY5;A0A1A8SFC1;A0A1A8UI02;A0A060XII9;A0A060XJX9;A0A087XQU7;A0A146NIL5;A0A146NIU7;A0A146NJR6;A0A146Q523;A0A146Z4H1;A0A146Z4J7;A0A146Z4K2;A0A146Z4L3;A0A146Z4P1;A0A146Z5L2;A0A146Z6F5;A0A…	1.11941	0.935289	SNMLGSAHEVQR		58.43	443.55	1327.63	3	-0.271899	27.1652
	A0A1A7Z4A6;A0A0D9SGF6;A0A0P7VEP4;A0A0R4IJ08;A0A0S7GKE8;A0A0S7GMT1;A0A0S7GQA6;A0A1A7WGD9;A0A1A8D2Q6;A0A1A8D8C3;A0A1A8GCR2;A0A1A8I584;A0A1A8KR84;A0A1A8MAY9;A0A1A8QC83;A0A1A8SFC1;A0A1A8UI02;A0A060XII9;A0A060XJX9;A0A087XQU7;A0A146Q523;A0A146Z4H1;A0A146Z4K2;A0A146Z4L3;A0A146Z4P1;A0A146Z5L2;A0A146Z6F5;F1R443;F1R446;G3Q393;G3Q398;H2MBY2;H2UIA9;H2UIB0;H2UIB1;H3C0G3;H3CBT9;M4A8R0;Q4T9R4;Q566W8;Q13813;W5KT…	9.5342	1.23316	EQLMASDDFGR		57.64	634.784	1267.55	2	1.9613	56.4104
	A0A1A7Z4A6;A0A0D9SGF6;A0A0P7VEP4;A0A0R4IJ08;A0A0S7GKE8;A0A0S7GMT1;A0A0S7GQA6;A0A1A7WGD9;A0A1A8D2Q6;A0A1A8D8C3;A0A1A8GCR2;A0A1A8I584;A0A1A8KR84;A0A1A8MAY9;A0A1A8QC83;A0A1A8SFC1;A0A1A8UI02;A0A060XII9;A0A060XJX9;A0A087XQU7;A0A146Q523;A0A146Z4H1;A0A146Z4K2;A0A146Z4L3;A0A146Z4P1;A0A146Z5L2;A0A146Z6F5;F1R443;F1R446;G3Q393;G3Q398;H2MBY2;H2UIA9;H2UIB0;H2UIB1;H3C0G3;H3CBT9;M4A8R0;Q4T9R4;Q566W8;Q13813;W5KT…	0.0416343	6.13441	EKEQLMASDDFGRDLASVQALLR		57.25	648.836	2591.31	4	5.12752	164.992
	A0A1A7Z4A6;A0A0P7VEP4;A0A0R4IJ08;A0A0S7GKQ9;A0A0S7GMT1;A0A0S7GRJ6;A0A1A7WGD9;A0A1A8D2Q6;A0A1A8D8C3;A0A1A8GCR2;A0A1A8I584;A0A1A8KR84;A0A1A8MAY9;A0A1A8QC83;A0A1A8SFC1;A0A1A8UI02;A0A060XII9;A0A087XQU7;A0A146Q523;A0A146Z4H1;A0A146Z4K2;A0A146Z4L3;A0A146Z4P1;A0A146Z5L2;A0A146Z6F5;A0A146Z650;F1R443;F1R446;G3Q393;G3Q398;H2UIA9;H2UIB0;H2UIB1;H3C0G3;H3CBT9;I3JZ89;I3JZ90;M4A8R0;Q4T9R4;Q4T9R5;W5KTF3;W5KTG2;W…	1.03818	313.195	RAALEDSFHLQQFFR		57.22	466.997	1863.96	4	9.12968	123.824
	A0A1A7Z4A6;A0A0D9SGF6;A0A0P7V2T7;A0A0P7VEP4;A0A0R4IJ08;A0A0S7GFQ8;A0A0S7GFR3;A0A0S7GFS1;A0A0S7GFS2;A0A0S7GFS3;A0A0S7GFT9;A0A0S7GG64;A0A0S7GGW2;A0A0S7GGW7;A0A0S7GKU3;A0A0S7GLM7;A0A0S7GNH5;A0A1A7WGD9;A0A1A8AIC9;A0A1A8DRB6;A0A1A8GCR2;A0A1A8KF62;A0A1A8MAY9;A0A1A8MXE6;A0A1A8QNY9;A0A1A8RNY5;A0A1A8SFC1;A0A1A8UI02;A0A060XII9;A0A060XJX9;A0A087XQU7;A0A146NIL5;A0A146NIU7;A0A146NJR6;A0A146Q523;A0A146Z4H1;A0A…	176.124	1.01947	SKLGESQTLQQFSR		57.05	804.917	1607.82	2	-6.37406	53.0722
	A0A1A7Z4A6;A0A0D9SGF6;A0A0P7V2T7;A0A0P7VEP4;A0A0R4IJ08;A0A0S7GKE8;A0A0S7GMT1;A0A0S7GQA6;A0A1A7WGD9;A0A1A8D2Q6;A0A1A8D8C3;A0A1A8GCR2;A0A1A8I584;A0A1A8KR84;A0A1A8MAY9;A0A1A8QC83;A0A1A8SFC1;A0A1A8UI02;A0A060XII9;A0A060XJX9;A0A087XQU7;A0A146Q523;A0A146Z4H1;A0A146Z4K2;A0A146Z4L3;A0A146Z4P1;A0A146Z5L2;A0A146Z6F5;F1R443;F1R446;H2UIA9;H2UIB0;H2UIB1;I3JZ89;I3JZ90;M4A8R0;Q4T9R4;Q4T9R5;Q566W8;Q13813;W5KTF3;…	1.06504	1.20015	FNRDVDETISWIK		56.12	541.613	1621.82	3	3.67186	98.3523
	A0A1A7Z4A6;A0A0D9SGF6;A0A0P7V2T7;A0A0R4IJ08;A0A0S7GFR3;A0A0S7GFS1;A0A0S7GFS2;A0A0S7GFS3;A0A0S7GG64;A0A0S7GGW2;A0A0S7GGW7;A0A0S7GKU3;A0A0S7GLM7;A0A0S7GNH5;A0A1A7WGD9;A0A1A8AIC9;A0A1A8DRB6;A0A1A8GCR2;A0A1A8MAY9;A0A1A8MXE6;A0A1A8QNY9;A0A1A8RNY5;A0A1A8SFC1;A0A1A8UI02;A0A060XII9;A0A060XJX9;A0A087XQU7;A0A146NIL5;A0A146NIU7;A0A146NJR6;A0A146Q523;A0A146Z4H1;A0A146Z4J7;A0A146Z4K2;A0A146Z4L3;A0A146Z4P1;A0A…	377.696	18.7436	DADETKEWIEEK		55.6	498.234	1491.68	3	7.33982	44.8114
	A0A1A7Z4A6;A0A0P7V2T7;A0A0S7GFR3;A0A0S7GFS1;A0A0S7GFS2;A0A0S7GFS3;A0A0S7GG64;A0A0S7GGW2;A0A0S7GGW7;A0A0S7GKU3;A0A0S7GLM7;A0A0S7GNH5;A0A1A7WGD9;A0A1A8AIC9;A0A1A8DRB6;A0A1A8GCR2;A0A1A8KF62;A0A1A8MAY9;A0A1A8MXE6;A0A1A8QNY9;A0A1A8RNY5;A0A1A8SFC1;A0A1A8UI02;A0A060XJX9;A0A087XQU7;A0A146NIL5;A0A146NIU7;A0A146NJR6;A0A146Q523;A0A146Z4H1;A0A146Z4J7;A0A146Z4K2;A0A146Z4L3;A0A146Z4P1;A0A146Z5L2;A0A146Z6F5;A0A…	0.476975	75.7443	GLVSSEELAKDVTGAEALLER		54.75	547.545	2186.15	4	5.63577	155.21
	A0A1A7Z4A6;A0A0D9SGF6;A0A0P7VEP4;A0A0R4IJ08;A0A0S7GKE8;A0A0S7GMT1;A0A0S7GQA6;A0A1A7WGD9;A0A1A8D2Q6;A0A1A8D8C3;A0A1A8GCR2;A0A1A8I584;A0A1A8KR84;A0A1A8MAY9;A0A1A8QC83;A0A1A8SFC1;A0A1A8UI02;A0A060XII9;A0A060XJX9;A0A087XQU7;A0A146Q523;A0A146Z4H1;A0A146Z4K2;A0A146Z4L3;A0A146Z4P1;A0A146Z5L2;A0A146Z6F5;F1R443;F1R446;G3Q393;G3Q398;H2MBY2;H2UIA9;H2UIB0;H2UIB1;H3C0G3;H3CBT9;M4A8R0;Q4T9R4;Q566W8;Q13813;W5KT…	0.13822	0.0380785	EQLMASDDFGRDLASVQALLR		53.67	779.066	2334.18	3	7.43772	168.006
	A0A1A7Z4A6;A0A0P7VEP4;A0A0R4IJ08;A0A0S7GFR3;A0A0S7GFS1;A0A0S7GFS2;A0A0S7GFS3;A0A0S7GG64;A0A0S7GGW2;A0A0S7GGW7;A0A0S7GKU3;A0A0S7GLM7;A0A0S7GNH5;A0A1A7WGD9;A0A1A8AIC9;A0A1A8DRB6;A0A1A8GCR2;A0A1A8KF62;A0A1A8MAY9;A0A1A8MXE6;A0A1A8QNY9;A0A1A8RNY5;A0A1A8SFC1;A0A1A8UI02;A0A060XII9;A0A060XJX9;A0A087XQU7;A0A146NIL5;A0A146NIU7;A0A146NJR6;A0A146Q523;A0A146Z4H1;A0A146Z4J7;A0A146Z4K2;A0A146Z4L3;A0A146Z4P1;A0A…	7.67321	210.65	LIQSHPEAVDDIQEK		52.66	861.44	1720.86	2	2.68113	42.2016
	A0A1A7Z4A6;A0A0D9SGF6;A0A0P7V2T7;A0A0P7VEP4;A0A0R4IJ08;A0A0S7GFR3;A0A0S7GFS2;A0A0S7GG64;A0A0S7GKU3;A0A0S7GLM7;A0A1A7WGD9;A0A1A8D2Q6;A0A1A8D8C3;A0A1A8GCR2;A0A1A8I584;A0A1A8KR84;A0A1A8MAY9;A0A1A8QC83;A0A1A8SFC1;A0A1A8UI02;A0A060XII9;A0A060XJX9;A0A087XQU7;A0A146NJR6;A0A146Q523;A0A146Z4H1;A0A146Z4J7;A0A146Z4K2;A0A146Z4L3;A0A146Z4P1;A0A146Z5L2;A0A146Z6F5;A0A146Z650;F1R443;F1R446;G3Q393;G3Q398;H2MBY2;H…	1.0417	0.0543832	LREANQQQQFNR		52.37	511.262	1530.76	3	-4.27043	20.2292
	A0A1A7Z4A6;A0A0D9SGF6;A0A0P7V2T7;A0A0P7VEP4;A0A0R4IJ08;A0A0S7GKE8;A0A0S7GMT1;A0A0S7GQA6;A0A1A7WGD9;A0A1A8D2Q6;A0A1A8D8C3;A0A1A8GCR2;A0A1A8I584;A0A1A8KR84;A0A1A8MAY9;A0A1A8QC83;A0A1A8SFC1;A0A1A8UI02;A0A060XII9;A0A060XJX9;A0A087XQU7;A0A146Q523;A0A146Z4H1;A0A146Z4K2;A0A146Z4L3;A0A146Z4P1;A0A146Z5L2;A0A146Z6F5;F1R443;F1R446;G3Q393;G3Q398;H2UIA9;H2UIB0;H2UIB1;H3C0G3;H3CBT9;I3JZ89;I3JZ90;M4A8R0;Q4T9R4;…	0.0367097	0.749109	DVDETISWIK		51.1	603.309	1204.6	2	2.06903	95.814
	A0A1A7Z4A6;A0A0D9SGF6;A0A0P7VEP4;A0A0R4IJ08;A0A0S7GFR3;A0A0S7GFS2;A0A0S7GG64;A0A0S7GKU3;A0A0S7GLM7;A0A1A7WGD9;A0A1A8D2Q6;A0A1A8D8C3;A0A1A8GCR2;A0A1A8I584;A0A1A8KR84;A0A1A8MAY9;A0A1A8QC83;A0A1A8SFC1;A0A1A8UI02;A0A060XII9;A0A060XJX9;A0A087XQU7;A0A146NJR6;A0A146Q523;A0A146Z4H1;A0A146Z4J7;A0A146Z4K2;A0A146Z4L3;A0A146Z4P1;A0A146Z5L2;A0A146Z6F5;A0A146Z650;F1R443;F1R446;G3Q393;G3Q398;H2UIA9;H2UIB0;H2UIB…	1.30642	0.821557	LLEATELK		50.6	458.772	915.529	2	-0.816887	51.8015
	A0A1A7Z4A6;A0A0D9SGF6;A0A0P7V2T7;A0A0P7VEP4;A0A0R4IJ08;A0A0S7GFQ2;A0A0S7GFQ8;A0A0S7GFR3;A0A0S7GFS1;A0A0S7GFS2;A0A0S7GFS3;A0A0S7GG64;A0A0S7GGW2;A0A0S7GGW7;A0A0S7GI92;A0A0S7GKU3;A0A0S7GLM7;A0A0S7GLW5;A0A0S7GNH5;A0A1A7WGD9;A0A1A8AIC9;A0A1A8DRB6;A0A1A8GCR2;A0A1A8KF62;A0A1A8MAY9;A0A1A8MXE6;A0A1A8QNY9;A0A1A8RNY5;A0A1A8SFC1;A0A1A8UI02;A0A060XII9;A0A060XJX9;A0A087XQU7;A0A146NIL5;A0A146NIU7;A0A146NJR6;A0A…	0.953975	0.827656	DLTGVQNLR		47.62	508.28	1014.55	2	-4.07736	50.4624
	A0A1A7Z4A6;A0A0D9SGF6;A0A0P7V2T7;A0A0P7VEP4;A0A0R4IJ08;A0A0S7GFQ8;A0A0S7GFR3;A0A0S7GFS1;A0A0S7GFS2;A0A0S7GFS3;A0A0S7GFT9;A0A0S7GG64;A0A0S7GGW2;A0A0S7GGW7;A0A0S7GKU3;A0A0S7GLM7;A0A0S7GNH5;A0A1A7WGD9;A0A1A8AIC9;A0A1A8DRB6;A0A1A8GCR2;A0A1A8KF62;A0A1A8MAY9;A0A1A8MXE6;A0A1A8QNY9;A0A1A8RNY5;A0A1A8SFC1;A0A1A8UI02;A0A060XII9;A0A060XJX9;A0A087XQU7;A0A146NIL5;A0A146NIU7;A0A146NJR6;A0A146Q523;A0A146Z4H1;A0A…	11.0449	93.973	SKLGESQTLQQFSR		46.81	536.945	1607.81	3	-10.3331	53.0722
	A0A1A7Z4A6;A0A0R4IJ08;A0A0S7GKE8;A0A0S7GKV9;A0A0S7GMT1;A0A0S7GPJ4;A0A0S7GQA6;A0A0S7GRJ6;A0A1A7WGD9;A0A1A8D2Q6;A0A1A8D8C3;A0A1A8GCR2;A0A1A8I584;A0A1A8KR84;A0A1A8MAY9;A0A1A8QC83;A0A1A8SFC1;A0A1A8UI02;A0A060XII9;A0A087XQU7;A0A146Q523;A0A146Z4H1;A0A146Z4K2;A0A146Z4L3;A0A146Z4P1;A0A146Z5L2;A0A146Z6F5;F1R443;F1R446;H2MBY2;H2UIA9;H2UIB0;H2UIB1;H3C0G3;H3CBT9;M4A8R0;Q4T9R4;Q4T9R5;Q566W8;W5KTF3;W5KTG2;W5MF…	1.85005	1.01947	LWDLLLQK		39.08	514.813	1027.61	2	0.50593	123.824
	A0A1A7Z4A6;A0A0D9SGF6;A0A0P7V2T7;A0A0P7VEP4;A0A0R4IJ08;A0A0S7GFQ8;A0A0S7GFR3;A0A0S7GFS1;A0A0S7GFS2;A0A0S7GFS3;A0A0S7GFT9;A0A0S7GG64;A0A0S7GGW2;A0A0S7GGW7;A0A0S7GKU3;A0A0S7GLM7;A0A0S7GNH5;A0A1A7WGD9;A0A1A8AIC9;A0A1A8DRB6;A0A1A8GCR2;A0A1A8KF62;A0A1A8MAY9;A0A1A8MXE6;A0A1A8QNY9;A0A1A8RNY5;A0A1A8SFC1;A0A1A8UI02;A0A060XII9;A0A060XJX9;A0A087XQU7;A0A146NIL5;A0A146NIU7;A0A146NJR6;A0A146Q523;A0A146Z4H1;A0A…	1.03591	0.81451	LGESQTLQQFSR		37.01	465.242	1392.7	3	2.45396	58.6754
	A0A1A7Z4A6;A0A0D9SGF6;A0A0P7VEP4;A0A0R4IJ08;A0A0S7GFS1;A0A0S7GFS2;A0A0S7GFS3;A0A0S7GG64;A0A0S7GGW2;A0A0S7GGW7;A0A0S7GI92;A0A0S7GKU3;A0A0S7GLM7;A0A0S7GLW5;A0A1A7WGD9;A0A1A8AIC9;A0A1A8DRB6;A0A1A8GCR2;A0A1A8KF62;A0A1A8MAY9;A0A1A8MXE6;A0A1A8QNY9;A0A1A8RNY5;A0A1A8SFC1;A0A1A8UI02;A0A060XII9;A0A060XJX9;A0A087XQU7;A0A146NIL5;A0A146NIU7;A0A146NJR6;A0A146Q523;A0A146Z4J7;A0A146Z4K2;A0A146Z4L3;A0A146Z4P1;A0A…	1.53291	0.988724	KVEDLFLTFAK		36.93	655.857	1309.7	2	-23.1591	119.386
	A0A1A7Z4A6;A0A0D9SGF6;A0A0P7V2T7;A0A0P7VEP4;A0A0R4IJ08;A0A0S7GFR3;A0A0S7GFS2;A0A0S7GG64;A0A0S7GKU3;A0A0S7GLM7;A0A1A7WGD9;A0A1A8D2Q6;A0A1A8GCR2;A0A1A8I584;A0A1A8KR84;A0A1A8MAY9;A0A1A8SFC1;A0A060XII9;A0A060XJX9;A0A087XQU7;A0A146NIL5;A0A146NIU7;A0A146NJR6;A0A146Q523;A0A146Z4H1;A0A146Z4J7;A0A146Z4L3;A0A146Z4P1;A0A146Z5L2;A0A146Z6F5;A0A146Z650;F1R443;F1R446;G3Q393;G3Q398;H2MBY2;H2UIA9;H2UIB0;H2UIB1;H3…	1.12398	1.23248	GKDLIGVQNLLKK		36.53	357.226	1424.87	4	2.74437	80.7888
	A0A1A7Z4A6;A0A0D9SGF6;A0A0P7V2T7;A0A0P7VEP4;A0A0R4IJ08;A0A0S7GFQ8;A0A0S7GFR3;A0A0S7GFS1;A0A0S7GFS2;A0A0S7GFS3;A0A0S7GFT9;A0A0S7GG64;A0A0S7GGW2;A0A0S7GGW7;A0A0S7GKU3;A0A0S7GLM7;A0A0S7GNH5;A0A1A7WGD9;A0A1A8AIC9;A0A1A8DRB6;A0A1A8GCR2;A0A1A8KF62;A0A1A8MAY9;A0A1A8MXE6;A0A1A8QNY9;A0A1A8RNY5;A0A1A8SFC1;A0A1A8UI02;A0A060XII9;A0A060XJX9;A0A087XQU7;A0A146NIL5;A0A146NIU7;A0A146NJR6;A0A146Q523;A0A146Z4H1;A0A…	1.03818	173.829	KHEDFDKAINVQEEK		32.61	458.234	1828.91	4	4.44861	30.8362
A0A146Z4P1	79	1.51824	1.01947	79
	A0A146Z4P1;A0A0D9SGF6;A0A0R4IJ08;A0A0S7GFR3;A0A0S7GFS1;A0A0S7GFS2;A0A0S7GFS3;A0A0S7GG64;A0A0S7GGW2;A0A0S7GGW7;A0A0S7GKU3;A0A0S7GLM7;A0A0S7GNH5;A0A1A7WGD9;A0A1A7Z4A6;A0A1A8GCR2;A0A1A8MAY9;A0A1A8MXE6;A0A1A8QNY9;A0A1A8RNY5;A0A1A8SFC1;A0A060XII9;A0A060XJX9;A0A087XQU7;A0A146NIL5;A0A146NIU7;A0A146NJR6;A0A146Q523;A0A146Z4H1;A0A146Z4J7;A0A146Z4K2;A0A146Z4L3;A0A146Z5L2;A0A146Z6F5;A0A146Z650;F1QDX2;F1R443;…	1.10634	0.946459	NQALNTDNYGHDLASVQALQR		127.8	776.717	2327.13	3	-0.924291	82.1301
	A0A146Z4P1;A0A0P7V2T7;A0A0S7GFR3;A0A0S7GFS1;A0A0S7GFS2;A0A0S7GFS3;A0A0S7GG64;A0A0S7GGW2;A0A0S7GGW7;A0A0S7GKU3;A0A0S7GLM7;A0A0S7GNH5;A0A1A7WGD9;A0A1A7Z4A6;A0A1A8AIC9;A0A1A8DRB6;A0A1A8GCR2;A0A1A8KF62;A0A1A8MAY9;A0A1A8MXE6;A0A1A8QNY9;A0A1A8RNY5;A0A1A8SFC1;A0A1A8UI02;A0A060XJX9;A0A087XQU7;A0A146NIL5;A0A146NIU7;A0A146NJR6;A0A146Q523;A0A146Z4H1;A0A146Z4J7;A0A146Z4K2;A0A146Z4L3;A0A146Z5L2;A0A146Z6F5;A0A…	0.000970093	0.480679	GLVSSEELAKDVTGAEALLER		115.99	729.722	2186.15	3	2.34333	162.693
	A0A146Z4P1;A0A0R4IJ08;A0A0S7GFS1;A0A0S7GFS2;A0A0S7GFS3;A0A0S7GG64;A0A0S7GGW2;A0A0S7GGW7;A0A0S7GI92;A0A0S7GKU3;A0A0S7GLM7;A0A0S7GLW5;A0A1A7WGD9;A0A1A7Z4A6;A0A1A8AIC9;A0A1A8DRB6;A0A1A8GCR2;A0A1A8KF62;A0A1A8MAY9;A0A1A8MXE6;A0A1A8QNY9;A0A1A8RNY5;A0A1A8SFC1;A0A1A8UI02;A0A060XII9;A0A060XJX9;A0A087XQU7;A0A146NIL5;A0A146NIU7;A0A146NJR6;A0A146Q523;A0A146Z4J7;A0A146Z4K2;A0A146Z4L3;A0A146Z6F5;A0A146Z650;F1R…	1.12788	1556.08	LNLVGSEDYGDTLAAVQGLLK		115.77	726.054	2175.14	3	0.603017	171.724
	A0A146Z4P1;A0A0R4IJ08;A0A0S7GFS1;A0A0S7GFS2;A0A0S7GFS3;A0A0S7GG64;A0A0S7GGW2;A0A0S7GGW7;A0A0S7GI92;A0A0S7GKU3;A0A0S7GLM7;A0A0S7GLW5;A0A1A7WGD9;A0A1A7Z4A6;A0A1A8AIC9;A0A1A8DRB6;A0A1A8GCR2;A0A1A8KF62;A0A1A8MAY9;A0A1A8MXE6;A0A1A8QNY9;A0A1A8RNY5;A0A1A8SFC1;A0A1A8UI02;A0A060XII9;A0A060XJX9;A0A087XQU7;A0A146NIL5;A0A146NIU7;A0A146NJR6;A0A146Q523;A0A146Z4J7;A0A146Z4K2;A0A146Z4L3;A0A146Z6F5;A0A146Z650;F1R…	16.1158	1.01947	LNLVGSEDYGDTLAAVQGLLK		109.97	1088.58	2175.15	2	6.71343	175.929
	A0A146Z4P1;A0A0D9SGF6;A0A0P7V2T7;A0A0P7VEP4;A0A0R4IJ08;A0A0S7GFS1;A0A0S7GFS2;A0A0S7GFS3;A0A0S7GG64;A0A0S7GGW2;A0A0S7GGW7;A0A0S7GI92;A0A0S7GKU3;A0A0S7GLM7;A0A0S7GLW5;A0A1A7WGD9;A0A1A7Z4A6;A0A1A8AIC9;A0A1A8DRB6;A0A1A8GCR2;A0A1A8KF62;A0A1A8MAY9;A0A1A8MXE6;A0A1A8QNY9;A0A1A8RNY5;A0A1A8SFC1;A0A1A8UI02;A0A1B0GV13;A0A060XII9;A0A060XJX9;A0A087XQU7;A0A146NIL5;A0A146NIU7;A0A146NJR6;A0A146Q523;A0A146Z4J7;A0A…	1.62303	0.582025	LDENSAFLQFNWK		109.63	806.398	1610.78	2	7.24726	133.8
	A0A146Z4P1;A0A0P7V2T7;A0A0P7VEP4;A0A0R4IJ08;A0A0S7GKE8;A0A0S7GMT1;A0A0S7GQA6;A0A1A7WGD9;A0A1A7Z4A6;A0A1A8D2Q6;A0A1A8D8C3;A0A1A8GCR2;A0A1A8I584;A0A1A8KR84;A0A1A8MAY9;A0A1A8QC83;A0A1A8SFC1;A0A1A8UI02;A0A060XII9;A0A060XJX9;A0A087XQU7;A0A146Q523;A0A146Z4H1;A0A146Z4K2;A0A146Z4L3;A0A146Z5L2;A0A146Z6F5;A0A146Z650;F1R443;F1R446;G3Q393;G3Q398;H2MBY2;I3JZ89;I3JZ90;M4A8R0;Q566W8;W5KTF3;W5KTG2;W5MFM2;W5MFP4	3.19093	1.85266	ALINADELANDVAGAEALLDR		107	718.709	2153.11	3	2.54416	185.541
	A0A146Z4P1;A0A0D9SGF6;A0A0P7V2T7;A0A0P7VEP4;A0A0R4IJ08;A0A0S7GFS2;A0A0S7GFS3;A0A0S7GGW7;A0A0S7GI92;A0A0S7GKU3;A0A1A7WGD9;A0A1A7Z4A6;A0A1A8AIC9;A0A1A8DRB6;A0A1A8GCR2;A0A1A8KF62;A0A1A8MAY9;A0A1A8MXE6;A0A1A8QNY9;A0A1A8RNY5;A0A1A8SFC1;A0A1A8UI02;A0A060XII9;A0A060XJX9;A0A087XQU7;A0A146NIU7;A0A146Q523;A0A146Z4J7;A0A146Z4L3;A0A146Z6F5;A0A146Z650;C0PUV6;F1R443;F1R445;F1R446;F8K8N3;G3Q393;G3Q398;H2MBY2;H2…	2.21306	2.37499	IEDLGAAMEEALILDNK		106.2	922.972	1843.93	2	5.60561	153.845
	A0A146Z4P1;A0A0D9SGF6;A0A0P7V2T7;A0A0P7VEP4;A0A0R4IJ08;A0A0S7GFS2;A0A0S7GFS3;A0A0S7GGW7;A0A0S7GI92;A0A0S7GKU3;A0A1A7WGD9;A0A1A7Z4A6;A0A1A8AIC9;A0A1A8DRB6;A0A1A8GCR2;A0A1A8KF62;A0A1A8MAY9;A0A1A8MXE6;A0A1A8QNY9;A0A1A8RNY5;A0A1A8SFC1;A0A1A8UI02;A0A060XII9;A0A060XJX9;A0A087XQU7;A0A146NIU7;A0A146Q523;A0A146Z4J7;A0A146Z4L3;A0A146Z6F5;A0A146Z650;C0PUV6;F1R443;F1R445;F1R446;F8K8N3;G3Q393;G3Q398;H2MBY2;H2…	12.4474	0.768997	KIEDLGAAMEEALILDNK		99.23	658.351	1972.03	3	5.84731	152.693
	A0A146Z4P1;A0A0D9SGF6;A0A0P7V2T7;A0A0P7VEP4;A0A0R4IJ08;A0A0S7GFR3;A0A0S7GFS2;A0A0S7GG64;A0A0S7GKU3;A0A0S7GLM7;A0A1A7WGD9;A0A1A7Z4A6;A0A1A8D2Q6;A0A1A8GCR2;A0A1A8I584;A0A1A8KR84;A0A1A8MXE6;A0A1A8QNY9;A0A1A8SFC1;A0A060XII9;A0A060XJX9;A0A146NIL5;A0A146NIU7;A0A146NJR6;A0A146Q523;A0A146Z4H1;A0A146Z4J7;A0A146Z4K2;A0A146Z4L3;A0A146Z5L2;A0A146Z6F5;A0A146Z650;F1R443;F1R446;G3Q393;G3Q398;H2UIB0;H2UIB1;H3CBT…	1.03818	2427.31	QQVAPTDDETGKELVLALYDYQEK		96.33	918.458	2752.35	3	4.07101	131.026
	A0A146Z4P1;A0A0R4IJ08;A0A0S7GFQ2;A0A0S7GFQ8;A0A0S7GFR3;A0A0S7GFS1;A0A0S7GFS2;A0A0S7GFS3;A0A0S7GG64;A0A0S7GGW2;A0A0S7GGW7;A0A0S7GI92;A0A0S7GKU3;A0A0S7GLM7;A0A0S7GLW5;A0A0S7GNH5;A0A1A7WGD9;A0A1A7Z4A6;A0A1A8AIC9;A0A1A8DRB6;A0A1A8GCR2;A0A1A8KF62;A0A1A8MAY9;A0A1A8MXE6;A0A1A8QNY9;A0A1A8RNY5;A0A1A8SFC1;A0A1A8UI02;A0A060XII9;A0A087XQU7;A0A146NIL5;A0A146NIU7;A0A146NJR6;A0A146Q523;A0A146Z4H1;A0A146Z4J7;A0A…	1.47246	0.92686	GVIDTGNALIQR		93.15	628.853	1255.69	2	1.68535	71.0409
	A0A146Z4P1;A0A0D9SGF6;A0A0P7V2T7;A0A0P7VEP4;A0A0R4IJ08;A0A1A7WGD9;A0A1A7Z4A6;A0A1A8D2Q6;A0A1A8D8C3;A0A1A8GCR2;A0A1A8I584;A0A1A8KR84;A0A1A8MAY9;A0A1A8QC83;A0A1A8SFC1;A0A1A8UI02;A0A060XII9;A0A060XJX9;A0A087XQU7;A0A146Q523;A0A146Z4H1;A0A146Z4J7;A0A146Z4K2;A0A146Z4L3;A0A146Z5L2;A0A146Z6F5;A0A146Z650;F1R443;F1R446;G3Q393;G3Q398;H2MBY2;H2UIA9;H2UIB0;H2UIB1;H3C0G3;H3CBT9;I3JZ89;I3JZ90;M4A8R0;Q4T9R4;Q4T9…	1.02938	1.07542	HQAFEAELSANQSR		92.43	529.923	1586.75	3	4.18109	40.423
	A0A146Z4P1;A0A0D9SFH4;A0A0D9SGF6;A0A0P7V2T7;A0A0P7VEP4;A0A0R4IJ08;A0A0S7GFS2;A0A0S7GFS3;A0A0S7GGW7;A0A0S7GI92;A0A0S7GKU3;A0A1A7WGD9;A0A1A7Z4A6;A0A1A8AIC9;A0A1A8DRB6;A0A1A8GCR2;A0A1A8KF62;A0A1A8MAY9;A0A1A8MXE6;A0A1A8QNY9;A0A1A8RNY5;A0A1A8SFC1;A0A1A8UI02;A0A060XII9;A0A060XJX9;A0A087XQU7;A0A146NIU7;A0A146Q523;A0A146Z4J7;A0A146Z4L3;A0A146Z650;C0PUV6;F1R443;F1R445;F1R446;F8K8N3;G3Q393;G3Q398;H2MBY2;H2…	1.80805	0.865306	SSEEIESAFR		88.75	577.771	1153.53	2	-1.61916	51.3788
	A0A146Z4P1;A0A0P7VEP4;A0A0R4IJ08;A0A0S7GFS1;A0A0S7GFS2;A0A0S7GFS3;A0A0S7GG64;A0A0S7GGW2;A0A0S7GGW7;A0A0S7GI92;A0A0S7GKU3;A0A0S7GLM7;A0A0S7GLW5;A0A1A7WGD9;A0A1A7Z4A6;A0A1A8AIC9;A0A1A8DRB6;A0A1A8GCR2;A0A1A8KF62;A0A1A8MAY9;A0A1A8MXE6;A0A1A8QNY9;A0A1A8RNY5;A0A1A8SFC1;A0A1A8UI02;A0A060XII9;A0A060XJX9;A0A087XQU7;A0A146NIL5;A0A146NIU7;A0A146NJR6;A0A146Q523;A0A146Z4J7;A0A146Z4K2;A0A146Z4L3;A0A146Z6F5;A0A…	145.971	0.577478	QETFDAGLQAFQQEGITNITALK		88.67	841.766	2522.28	3	3.03161	153.268
	A0A146Z4P1;A0A0D9SGF6;A0A0P7VEP4;A0A0R4IJ08;A0A0S7GFS2;A0A0S7GFS3;A0A0S7GGW7;A0A0S7GI92;A0A0S7GKU3;A0A1A7WGD9;A0A1A7Z4A6;A0A1A8AIC9;A0A1A8DRB6;A0A1A8GCR2;A0A1A8KF62;A0A1A8MAY9;A0A1A8MXE6;A0A1A8QNY9;A0A1A8RNY5;A0A1A8SFC1;A0A1A8UI02;A0A060XII9;A0A060XJX9;A0A087XQU7;A0A146NIU7;A0A146Q523;A0A146Z4J7;A0A146Z4L3;A0A146Z6F5;A0A146Z650;C0PUV6;F1R443;F1R445;F1R446;F8K8N3;G3Q393;G3Q398;H2MBY2;H2UGD2;H3C0G3…	0.233289	0.00119199	YTEHSTVGLAQQWDQLDQLGMR		87.43	859.415	2575.22	3	5.41344	132.586
	A0A146Z4P1;A0A0D9SGF6;A0A0P7VEP4;A0A0R4IJ08;A0A0S7GFQ8;A0A0S7GFR3;A0A0S7GFS1;A0A0S7GFS2;A0A0S7GFS3;A0A0S7GFT9;A0A0S7GG64;A0A0S7GGW2;A0A0S7GGW7;A0A0S7GKU3;A0A0S7GLM7;A0A0S7GNH5;A0A1A7WGD9;A0A1A7Z4A6;A0A1A8AIC9;A0A1A8DRB6;A0A1A8GCR2;A0A1A8KF62;A0A1A8MAY9;A0A1A8MXE6;A0A1A8QNY9;A0A1A8RNY5;A0A1A8SFC1;A0A1A8UI02;A0A060XII9;A0A060XJX9;A0A087XQU7;A0A146NIL5;A0A146NIU7;A0A146NJR6;A0A146Q523;A0A146Z4H1;A0A…	639.152	1.0256	DCEQAENWMAAR	[2] Methylthio (C)	84.18	735.286	1468.56	2	4.578	79.8609
	A0A146Z4P1;A0A0R4IJ08;A0A0S7GFR3;A0A0S7GFS2;A0A0S7GG64;A0A0S7GKU3;A0A0S7GLM7;A0A1A7WGD9;A0A1A7Z4A6;A0A1A8D2Q6;A0A1A8D8C3;A0A1A8GCR2;A0A1A8I584;A0A1A8KR84;A0A1A8QNY9;A0A1A8SFC1;A0A060XII9;A0A060XJX9;A0A087XQU7;A0A146NIL5;A0A146NIU7;A0A146NJR6;A0A146Q523;A0A146Z4H1;A0A146Z4J7;A0A146Z4K2;A0A146Z4L3;A0A146Z5L2;A0A146Z6F5;A0A146Z650;F1R443;F1R446;H2UIA9;H2UIB0;H2UIB1;M4A8R0;W5KTF3;W5KTG2	1.21813	0.849124	EKEPIVGSPDYGKDEDSAEALLK		83.57	623.313	2489.22	4	0.933673	82.5533
	A0A146Z4P1;A0A0D9SGF6;A0A0P7V2T7;A0A0R4IJ08;A0A0S7GFR3;A0A0S7GFS1;A0A0S7GFS2;A0A0S7GFS3;A0A0S7GG64;A0A0S7GGW2;A0A0S7GGW7;A0A0S7GKU3;A0A0S7GLM7;A0A0S7GNH5;A0A1A7WGD9;A0A1A7Z4A6;A0A1A8AIC9;A0A1A8DRB6;A0A1A8GCR2;A0A1A8MAY9;A0A1A8MXE6;A0A1A8QNY9;A0A1A8RNY5;A0A1A8SFC1;A0A1A8UI02;A0A060XII9;A0A060XJX9;A0A087XQU7;A0A146NIL5;A0A146NIU7;A0A146NJR6;A0A146Q523;A0A146Z4H1;A0A146Z4J7;A0A146Z4K2;A0A146Z4L3;A0A…	342.749	49.8991	DADETKEWIEEK		83.48	746.846	1491.68	2	5.32486	44.8114
	A0A146Z4P1;A0A0D9SGF6;A0A0P7V2T7;A0A0P7VEP4;A0A0R4IJ08;A0A0S7GFQ8;A0A0S7GFR3;A0A0S7GFS1;A0A0S7GFS2;A0A0S7GFS3;A0A0S7GFT9;A0A0S7GG64;A0A0S7GGW2;A0A0S7GGW7;A0A0S7GKU3;A0A0S7GLM7;A0A0S7GNH5;A0A1A7WGD9;A0A1A7Z4A6;A0A1A8AIC9;A0A1A8DRB6;A0A1A8GCR2;A0A1A8KF62;A0A1A8MAY9;A0A1A8MXE6;A0A1A8QNY9;A0A1A8RNY5;A0A1A8SFC1;A0A1A8UI02;A0A060XII9;A0A060XJX9;A0A087XQU7;A0A146NIL5;A0A146NIU7;A0A146NJR6;A0A146Q523;A0A…	1.58256	1.52869	DVTGAEALLER		82.72	587.31	1172.6	2	3.83635	77.9559
	A0A146Z4P1;A0A0D9SGF6;A0A0P7V2T7;A0A0P7VEP4;A0A0R4IJ08;A0A1A7WGD9;A0A1A7Z4A6;A0A1A8D2Q6;A0A1A8D8C3;A0A1A8GCR2;A0A1A8I584;A0A1A8KR84;A0A1A8MAY9;A0A1A8QC83;A0A1A8SFC1;A0A1A8UI02;A0A060XII9;A0A060XJX9;A0A087XQU7;A0A146Q523;A0A146Z4H1;A0A146Z4J7;A0A146Z4K2;A0A146Z4L3;A0A146Z5L2;A0A146Z6F5;A0A146Z650;F1R443;F1R446;G3Q393;G3Q398;H2MBY2;H2UIA9;H2UIB0;H2UIB1;H3C0G3;H3CBT9;I3JZ89;I3JZ90;M4A8R0;Q4T9R4;Q4T9…	1.36222	1.05396	HQAFEAELSANQSR		82.34	794.38	1586.75	2	3.32603	40.4952
	A0A146Z4P1;A0A0D9SGF6;A0A0P7V2T7;A0A0P7VEP4;A0A0R4IJ08;A0A0S7GKE8;A0A0S7GMT1;A0A0S7GQA6;A0A1A7WGD9;A0A1A7Z4A6;A0A1A8D2Q6;A0A1A8D8C3;A0A1A8GCR2;A0A1A8I584;A0A1A8KR84;A0A1A8MAY9;A0A1A8QC83;A0A1A8SFC1;A0A1A8UI02;A0A060XII9;A0A060XJX9;A0A087XQU7;A0A146Q523;A0A146Z4H1;A0A146Z4K2;A0A146Z4L3;A0A146Z5L2;A0A146Z6F5;F1R443;F1R446;G3Q393;G3Q398;H2MBY2;H2UIA9;H2UIB0;H2UIB1;H3C0G3;H3CBT9;I3JZ89;I3JZ90;M4A8R0;…	13.9598	12.7181	DLASVQALLR		82.27	543.319	1084.62	2	4.01573	111.985
	A0A146Z4P1;A0A0R4IJ08;A0A0S7GFS1;A0A0S7GFS2;A0A0S7GFS3;A0A0S7GG64;A0A0S7GGW2;A0A0S7GGW7;A0A0S7GI92;A0A0S7GKU3;A0A0S7GLM7;A0A0S7GLW5;A0A1A7WGD9;A0A1A7Z4A6;A0A1A8AIC9;A0A1A8DRB6;A0A1A8GCR2;A0A1A8KF62;A0A1A8MAY9;A0A1A8MXE6;A0A1A8QNY9;A0A1A8RNY5;A0A1A8SFC1;A0A1A8UI02;A0A060XII9;A0A060XJX9;A0A087XQU7;A0A146NIL5;A0A146NIU7;A0A146NJR6;A0A146Q523;A0A146Z4J7;A0A146Z4L3;A0A146Z6F5;A0A146Z650;C0PUV6;F1R443;…	0.00243808	1.43642	QETFDAGLQAFQQEGITNITALKDQLLAAK		81.55	1088.24	3261.69	3	0.395662	190.428
	A0A146Z4P1;A0A0R4IJ08;A0A0S7GKE8;A0A0S7GKV9;A0A0S7GQU7;A0A1A8D2Q6;A0A1A8D8C3;A0A1A8GCR2;A0A1A8I584;A0A1A8KR84;A0A1A8MAY9;A0A1A8QC83;A0A1A8SFC1;A0A1A8UI02;A0A060XII9;A0A060XJX9;A0A087XQU7;A0A146Z4H1;A0A146Z4K2;A0A146Z4L3;A0A146Z5L2;A0A146Z6F5;F1R443;F1R446;G3Q393;G3Q398;H2MBY2;I3JZ89;I3JZ90;M4A8R0;Q32P38;Q566W8;W5KTF3;W5KTG2;W5MFM2;W5MFP4	3.59038	0.31157	DADELEKWIQEK		80.79	752.37	1502.73	2	-2.72521	95.8845
	A0A146Z4P1;A0A0D9SGF6;A0A0P7V2T7;A0A0P7VEP4;A0A0R4IJ08;A0A0S7GFS1;A0A0S7GFS2;A0A0S7GFS3;A0A0S7GG64;A0A0S7GGW2;A0A0S7GGW7;A0A0S7GI92;A0A0S7GKU3;A0A0S7GLM7;A0A0S7GLW5;A0A1A7WGD9;A0A1A7Z4A6;A0A1A8AIC9;A0A1A8DRB6;A0A1A8GCR2;A0A1A8KF62;A0A1A8MAY9;A0A1A8MXE6;A0A1A8QNY9;A0A1A8RNY5;A0A1A8SFC1;A0A1A8UI02;A0A060XII9;A0A060XJX9;A0A087XQU7;A0A146NIL5;A0A146NIU7;A0A146NJR6;A0A146Q523;A0A146Z4J7;A0A146Z4K2;A0A…	3.42187	0.776863	ADVVESWIGEK		80.45	616.814	1231.61	2	3.30561	81.7777
	A0A146Z4P1;A0A0S7GFS2;A0A0S7GFS3;A0A0S7GGW7;A0A0S7GI92;A0A0S7GKU3;A0A1A7WGD9;A0A1A7Z4A6;A0A1A8AIC9;A0A1A8DRB6;A0A1A8GCR2;A0A1A8KF62;A0A1A8MAY9;A0A1A8MXE6;A0A1A8QNY9;A0A1A8RNY5;A0A1A8SFC1;A0A1A8UI02;A0A060XII9;A0A060XJX9;A0A146NIU7;A0A146Q523;A0A146Z4J7;A0A146Z4L3;A0A146Z6F5;A0A146Z650;C0PUV6;F1R446;G3Q393;G3Q398;H2MBY2;H3C0G3;H3CBT9;I3JZ89;Q13813;W5KTG2;W5MFM2	3.63141	5.60988	TYLLDGSCMVEESGTLESQLEATKR	[8] Methylthio (C)	79.79	936.109	2805.3	3	4.90607	152.98
	A0A146Z4P1;A0A0D9SGF6;A0A0P7V2T7;A0A0P7VEP4;A0A0R4IJ08;A0A0S7GKE8;A0A0S7GMT1;A0A0S7GQA6;A0A1A7WGD9;A0A1A7Z4A6;A0A1A8D2Q6;A0A1A8D8C3;A0A1A8GCR2;A0A1A8I584;A0A1A8KR84;A0A1A8MAY9;A0A1A8QC83;A0A1A8SFC1;A0A1A8UI02;A0A060XII9;A0A060XJX9;A0A087XQU7;A0A146Q523;A0A146Z4H1;A0A146Z4K2;A0A146Z4L3;A0A146Z5L2;A0A146Z6F5;A0A146Z650;F1R443;F1R446;G3Q393;G3Q398;H2MBY2;H2UIA9;H2UIB0;H2UIB1;H3C0G3;H3CBT9;I3JZ89;I3J…	4.51153	0.892071	DTEQVDNWMSK		79.45	676.796	1351.58	2	5.05027	55.3468
	A0A146Z4P1;A0A0R4IJ08;A0A0S7GFS1;A0A0S7GFS2;A0A0S7GFS3;A0A0S7GG64;A0A0S7GGW2;A0A0S7GGW7;A0A0S7GI92;A0A0S7GKU3;A0A0S7GLM7;A0A0S7GLW5;A0A1A7WGD9;A0A1A7Z4A6;A0A1A8AIC9;A0A1A8DRB6;A0A1A8GCR2;A0A1A8KF62;A0A1A8MAY9;A0A1A8MXE6;A0A1A8QNY9;A0A1A8RNY5;A0A1A8SFC1;A0A1A8UI02;A0A060XII9;A0A060XJX9;A0A087XQU7;A0A146NIL5;A0A146NIU7;A0A146NJR6;A0A146Q523;A0A146Z4J7;A0A146Z4L3;A0A146Z6F5;A0A146Z650;C0PUV6;F1R443;…	1158.65	1.01947	QETFDAGLQAFQQEGITNITALKDQLLAAK		78.96	816.434	3261.71	4	4.85996	190.921
	A0A146Z4P1;A0A0R4IJ08;A0A0S7GFS1;A0A0S7GFS2;A0A0S7GFS3;A0A0S7GG64;A0A0S7GGW2;A0A0S7GGW7;A0A0S7GI92;A0A0S7GKU3;A0A0S7GLM7;A0A0S7GLW5;A0A1A7WGD9;A0A1A7Z4A6;A0A1A8AIC9;A0A1A8DRB6;A0A1A8GCR2;A0A1A8KF62;A0A1A8MAY9;A0A1A8MXE6;A0A1A8QNY9;A0A1A8RNY5;A0A1A8SFC1;A0A1A8UI02;A0A060XII9;A0A060XJX9;A0A087XQU7;A0A146NIL5;A0A146NIU7;A0A146NJR6;A0A146Q523;A0A146Z4J7;A0A146Z4L3;A0A146Z6F5;A0A146Z650;C0PUV6;F1R443;…	176.05	1.01947	QETFDAGLQAFQQEGITNITALKDQLLAAK	[N-term] Gln->pyro-Glu (N-term Q)	77.51	1082.57	3244.68	3	4.79505	192.126
	A0A146Z4P1;A0A0P7VEP4;A0A0R4IJ08;A0A0S7GKQ9;A0A0S7GMT1;A0A0S7GRJ6;A0A1A7WGD9;A0A1A7Z4A6;A0A1A8D2Q6;A0A1A8D8C3;A0A1A8GCR2;A0A1A8I584;A0A1A8KR84;A0A1A8MAY9;A0A1A8QC83;A0A1A8SFC1;A0A1A8UI02;A0A060XII9;A0A087XQU7;A0A146Q523;A0A146Z4H1;A0A146Z4K2;A0A146Z4L3;A0A146Z5L2;A0A146Z6F5;A0A146Z650;F1R443;F1R446;G3Q393;G3Q398;H2UIA9;H2UIB0;H2UIB1;H3C0G3;H3CBT9;I3JZ89;I3JZ90;M4A8R0;Q4T9R4;Q4T9R5;W5KTF3;W5KTG2;W…	1.19251	1.01947	RAALEDSFHLQQFFR		77.08	622.323	1863.95	3	3.76403	124.952
	A0A146Z4P1;A0A0R4IJ08;A0A0S7GFR3;A0A0S7GFS3;A0A0S7GG64;A0A0S7GGW2;A0A0S7GKU3;A0A0S7GNH5;A0A1A7WGD9;A0A1A7Z4A6;A0A1A8AIC9;A0A1A8DRB6;A0A1A8GCR2;A0A1A8KF62;A0A1A8MAY9;A0A1A8MXE6;A0A1A8QNY9;A0A1A8RNY5;A0A1A8SFC1;A0A1A8UI02;A0A060XII9;A0A060XJX9;A0A087XQU7;A0A146NIL5;A0A146NIU7;A0A146NJR6;A0A146Z4H1;F1R446;G3Q398;H2MBY2;H2UIB0;I3JZ89;M4A8R0;W5KTF3;W5KTG2;W5MFM2;W5MFP4	1.81363	0.890157	LQTATDESYKDPTNIQLSK		77.03	718.032	2151.07	3	1.28737	63.1219
	A0A146Z4P1;A0A0D9SGF6;A0A0P7V2T7;A0A0P7VEP4;A0A0R4IJ08;A0A0S7GFS1;A0A0S7GFS2;A0A0S7GFS3;A0A0S7GG64;A0A0S7GGW2;A0A0S7GGW7;A0A0S7GI92;A0A0S7GKU3;A0A0S7GLM7;A0A0S7GLW5;A0A1A7WGD9;A0A1A7Z4A6;A0A1A8AIC9;A0A1A8DRB6;A0A1A8GCR2;A0A1A8KF62;A0A1A8MAY9;A0A1A8MXE6;A0A1A8QNY9;A0A1A8RNY5;A0A1A8SFC1;A0A1A8UI02;A0A060XII9;A0A060XJX9;A0A087XQU7;A0A146NIL5;A0A146NIU7;A0A146NJR6;A0A146Q523;A0A146Z4J7;A0A146Z4K2;A0A…	1.51824	0.852764	DLSSVQTLLTK		76.54	602.844	1203.67	2	2.8522	99.131
	A0A146Z4P1;A0A0P7VEP4;A0A0R4IJ08;A0A0S7GKQ9;A0A0S7GMT1;A0A0S7GRJ6;A0A1A7WGD9;A0A1A7Z4A6;A0A1A8D2Q6;A0A1A8D8C3;A0A1A8GCR2;A0A1A8I584;A0A1A8KR84;A0A1A8MAY9;A0A1A8QC83;A0A1A8SFC1;A0A1A8UI02;A0A060XII9;A0A060XJX9;A0A087XQU7;A0A146Q523;A0A146Z4H1;A0A146Z4K2;A0A146Z4L3;A0A146Z5L2;A0A146Z6F5;A0A146Z650;F1R443;F1R446;G3Q393;G3Q398;H2MBY2;H2UIA9;H2UIB0;H2UIB1;H3C0G3;H3CBT9;I3JZ89;I3JZ90;M4A8R0;Q4T9R4;Q4T9…	1.13379	1.01947	DSDELKSWINEK		75.04	732.356	1462.7	2	5.36109	70.5467
	A0A146Z4P1;A0A0D9SGF6;A0A0P7V2T7;A0A0P7VEP4;A0A0R4IJ08;A0A0S7GFS1;A0A0S7GFS2;A0A0S7GFS3;A0A0S7GG64;A0A0S7GGW2;A0A0S7GGW7;A0A0S7GI92;A0A0S7GKU3;A0A0S7GLM7;A0A0S7GLW5;A0A1A7WGD9;A0A1A7Z4A6;A0A1A8AIC9;A0A1A8DRB6;A0A1A8GCR2;A0A1A8KF62;A0A1A8MAY9;A0A1A8MXE6;A0A1A8QNY9;A0A1A8RNY5;A0A1A8SFC1;A0A1A8UI02;A0A060XII9;A0A060XJX9;A0A087XQU7;A0A146NIL5;A0A146NIU7;A0A146NJR6;A0A146Q523;A0A146Z4J7;A0A146Z4K2;A0A…	1.03818	0.845309	ASAFNSWFENAEEDLTDPVR		74.24	1149.52	2297.03	2	4.16893	161.833
	A0A146Z4P1;A0A0D9SGF6;A0A0P7VEP4;A0A0R4IJ08;A0A0S7GFR3;A0A0S7GFS2;A0A0S7GG64;A0A0S7GKU3;A0A0S7GLM7;A0A1A7WGD9;A0A1A7Z4A6;A0A1A8D2Q6;A0A1A8GCR2;A0A1A8I584;A0A1A8KR84;A0A1A8MXE6;A0A1A8QNY9;A0A1A8SFC1;A0A060XII9;A0A146NIL5;A0A146NIU7;A0A146NJR6;A0A146Q523;A0A146Z4H1;A0A146Z4J7;A0A146Z4K2;A0A146Z4L3;A0A146Z5L2;A0A146Z6F5;A0A146Z650;F1R443;F1R446;G3Q393;G3Q398;H2MBY2;H2UIA9;H2UIB0;H2UIB1;H3C0G3;H3CBT9…	9.89134	42.8179	KGDILTLLNSTNKDWWK		73.99	678.035	2031.08	3	1.34542	153.628
	A0A146Z4P1;A0A0D9SGF6;A0A0P7VEP4;A0A0R4IJ08;A0A0S7GKE8;A0A0S7GMT1;A0A0S7GQA6;A0A1A7WGD9;A0A1A7Z4A6;A0A1A8D2Q6;A0A1A8D8C3;A0A1A8GCR2;A0A1A8I584;A0A1A8KR84;A0A1A8MAY9;A0A1A8QC83;A0A1A8SFC1;A0A1A8UI02;A0A060XII9;A0A060XJX9;A0A087XQU7;A0A146Q523;A0A146Z4H1;A0A146Z4K2;A0A146Z4L3;A0A146Z5L2;A0A146Z6F5;A0A146Z650;F1R443;F1R446;G3Q393;G3Q398;I3JZ89;I3JZ90;M4A8R0;Q566W8;Q13813;W5KTF3;W5KTG2;W5MFM2;W5MFP4	2.07143	0.191413	DLTSWVTEMK		73.73	605.296	1208.58	2	6.47796	114.66
	A0A146Z4P1;A0A0D9SGF6;A0A0P7V2T7;A0A0R4IJ08;A0A060XJX9;A0A146Q523;A0A146Z4H1;A0A146Z4J7;A0A146Z4K2;A0A146Z4L3;A0A146Z5L2;A0A146Z6F5;A0A146Z650;F1QDX2;F1R443;F1R446;G3Q393;G3Q398;H2MBY2;H3C0G3;H3CBT9;I3JZ89;I3JZ90;Q4T9R4;Q4T9R5;Q13813;W5KTF3;W5KTG2;W5MFM2;W5MFP4	1.34405	1.11579	DLAALGDKVNSLGETAER		73.23	620.321	1857.94	3	0.633634	86.0829
	A0A146Z4P1;A0A0R4IJ08;A0A0S7GFQ8;A0A0S7GFR3;A0A0S7GFS1;A0A0S7GFS2;A0A0S7GFS3;A0A0S7GFT9;A0A0S7GG64;A0A0S7GGW2;A0A0S7GGW7;A0A0S7GKU3;A0A0S7GLM7;A0A0S7GNH5;A0A1A7WGD9;A0A1A7Z4A6;A0A1A8AIC9;A0A1A8DRB6;A0A1A8GCR2;A0A1A8KF62;A0A1A8MAY9;A0A1A8MXE6;A0A1A8QNY9;A0A1A8RNY5;A0A1A8SFC1;A0A1A8UI02;A0A060XII9;A0A060XJX9;A0A087XQU7;A0A146NIL5;A0A146NIU7;A0A146NJR6;A0A146Q523;A0A146Z4H1;A0A146Z4J7;A0A146Z4K2;A0A…	1.2166	0.487952	EAFLASDDKGDSLDSVEALIK		71.06	741.709	2222.11	3	2.41343	138.153
	A0A146Z4P1;A0A0D9SGF6;A0A0P7V2T7;A0A0P7VEP4;A0A0R4IJ08;A0A0S7GFS2;A0A0S7GFS3;A0A0S7GGW7;A0A0S7GI92;A0A0S7GKU3;A0A1A7WGD9;A0A1A7Z4A6;A0A1A8AIC9;A0A1A8DRB6;A0A1A8GCR2;A0A1A8KF62;A0A1A8MAY9;A0A1A8MXE6;A0A1A8QNY9;A0A1A8RNY5;A0A1A8SFC1;A0A1A8UI02;A0A060XII9;A0A060XJX9;A0A087XQU7;A0A146NIU7;A0A146Q523;A0A146Z4J7;A0A146Z4L3;A0A146Z6F5;A0A146Z650;C0PUV6;F1R443;F1R445;F1R446;F8K8N3;G3Q393;G3Q398;H2MBY2;H2…	748.413	24.6248	KIEDLGAAMEEALILDNK		70.83	987.022	1972.03	2	5.20131	152.693
[truncated: 22,191 more rows]

## Sheet: Peptide List__Cytosol Sample1
Main Accession	Protein Group	V1-Cyto/C1-Cyto	Sequence	Modifications	Score	m/z	Mr (Da)	Charge	Delta (ppm)	RT
P02769	42	1.38493	42
	P02769	0.876925	LGEYGFQNALIVR		128.44	740.401	1478.79	2	-1.28036	107.911
	P02769	5.15695	MPCTEDYLSLILNR	[3] Methylthio (C)	111.13	857.41	1712.81	2	9.50295	168.637
[truncated: 1,938 more rows]

## Sheet: Peptide List_Cytosol Sample2
Main Accession	Protein Group	V2-Cyto/C2-Cyto	Sequence	Modifications	Score	m/z	Mr (Da)	Charge	Delta (ppm)	RT
[truncated: 2,428 more rows]

[truncated: 2 more sheets: Peptide List_Cytosol Sample1_b, Peptide List_Cytosol Sample2_b]
